# Supplementary material for: m6A RNA methylation impacts fate choices during skin morphogenesis
Source: eLife. 2020 Aug 26;9:e56980. doi: 10.7554/eLife.56980 (PMC7535931; doi:10.7554/eLife.56980)
Supplement: Figure 2—figure supplement 2—source data 1. [file elife-56980-fig2-figsupp2-data1.xlsx]

## Sheet: Sheet1
	Body weight (unit: g)
Time Point	Ctrl	Ctrl	Ctrl	Ctrl	Ctrl	cKO	cKO	cKO	cKO	cKO
P0	1.4	1.3	1.3	1.3	1.2	1.3	1.3	1.3	1.3	1.3
P1	1.5	1.4	1.4	1.4	1.4	1.4	1.4	1.3	1.3	1.3
P2	1.8	1.7	1.7	1.6	1.6	1.6	1.5	1.5	1.5	1.5
P3	2.3	2.2	2.1	2	1.9	1.9	1.7	1.7	1.6	1.5
P4	3.1	2.8	2.7	2.6	2.5	2.2	2	2	1.8	1.5
P5	3.8	3.5	3.4	3.1	3	2.5	2	2	1.9	1.4
P6	4.8	4.3	4.3	4	3.9	2.3	1.8	1.8	1.7	Dead
