# Supplementary material for: m6A RNA methylation impacts fate choices during skin morphogenesis
Source: eLife. 2020 Aug 26;9:e56980. doi: 10.7554/eLife.56980 (PMC7535931; doi:10.7554/eLife.56980)
Supplement: Figure 2—figure supplement 2—source data 2. [file elife-56980-fig2-figsupp2-data2.xlsx]

## Sheet: Sheet1
Relative water loss rate
	P0		P6
	Ctrl	cKO	Ctrl	cKO
Replicate 1	0.928429	1.11183	0.848485	1.31016
Replicate 2	1.03777	0.937873	0.795009	0.983957
Replicate 3	1.07555	0.946322	1.09091	1.21604
Replicate 4	0.95825	1.28429	1.2656	1.24955
