# Supplementary material for: m6A RNA methylation impacts fate choices during skin morphogenesis
Source: eLife. 2020 Aug 26;9:e56980. doi: 10.7554/eLife.56980 (PMC7535931; doi:10.7554/eLife.56980)
Supplement: Figure 2—source data 1. [file elife-56980-fig2-data1.xlsx]

## Sheet: Sheet1
Sample	Genotype	m6A signal	A signal	m6A/A
Mettl3 +/+ Replicate 1	Mettl3 +/+, Rosa26-YFP fl/+, K14-Cre	1356.73	7876.24	0.172257
Mettl3 +/+ Replicate 2	Mettl3 +/+, Rosa26-YFP fl/+, K14-Cre	1704.68	9250.75	0.184275
Mettl3 +/- Replicate 1	Mettl3 fl/+, Rosa26-YFP fl/+, K14-Cre	2200.26	11721.1	0.187718
Mettl3 +/- Replicate 2	Mettl3 fl/+, Rosa26-YFP fl/+, K14-Cre	1483.14	7472.1	0.198491
Mettl3 +/- Replicate 3	Mettl3 fl/+, Rosa26-YFP fl/+, K14-Cre	1145.02	7146.75	0.160216
Mettl3 -/- Replicate 1	Mettl3 fl/fl, Rosa26-YFP fl/+, K14-Cre	426.837	9738.55	0.0438296
Mettl3 -/- Replicate 2	Mettl3 fl/fl, Rosa26-YFP fl/+, K14-Cre	309.857	4658.08	0.0665204
Mettl3 -/- Replicate 3	Mettl3 fl/fl, Rosa26-YFP fl/+, K14-Cre	151.595	7978.46	0.0190005
