# Supplementary material for: m6A RNA methylation impacts fate choices during skin morphogenesis
Source: eLife. 2020 Aug 26;9:e56980. doi: 10.7554/eLife.56980 (PMC7535931; doi:10.7554/eLife.56980)
Supplement: Figure 2—source data 2. [file elife-56980-fig2-data2.xlsx]

## Sheet: E16.5
		Number in a 0.308 mm2 field				Number per mm2
		Placode	Germ	Peg	Long Peg	Placode	Germ	Peg	Long Peg
Ctrl Replicate 1	Image 1	24	3	1	1	77.9944	9.7493	3.24977	3.24977
	Image 2	21	5	2	0	68.2451	16.2488	6.49954	0
	Image 3	16	3	0	1	51.9963	9.7493	0	3.24977
	Image 4	24	3	1	1	77.9944	9.7493	3.24977	3.24977
	Image 5	20	4	2	2	64.9954	12.9991	6.49954	6.49954
	Image 6	21	2	2	1	68.2451	6.49954	6.49954	3.24977
	Image 7	18	2	1	1	58.4958	6.49954	3.24977	3.24977
	Image 8	16	1	2	1	51.9963	3.24977	6.49954	3.24977
	Image 9	22	1	2	0	71.4949	3.24977	6.49954	0
	Image 10	20	2	1	0	64.9954	6.49954	3.24977	0
Ctrl Replicate 2	Image 1	20	6	1	1	64.9954	19.4986	3.24977	3.24977
	Image 2	22	5	1	0	71.4949	16.2488	3.24977	0
	Image 3	24	3	2	0	77.9944	9.7493	6.49954	0
	Image 4	27	5	0	1	87.7437	16.2488	0	3.24977
	Image 5	20	4	3	1	64.9954	12.9991	9.7493	3.24977
	Image 6	22	6	3	1	71.4949	19.4986	9.7493	3.24977
	Image 7	23	5	4	0	74.7447	16.2488	12.9991	0
	Image 8	27	8	2	3	87.7437	25.9981	6.49954	9.7493
	Image 9	28	6	4	1	90.9935	19.4986	12.9991	3.24977
	Image 10	21	7	2	2	68.2451	22.7484	6.49954	6.49954
Ctrl Replicate 3	Image 1	19	6	4	1	61.7456	19.4986	12.9991	3.24977
	Image 2	23	6	1	1	74.7447	19.4986	3.24977	3.24977
	Image 3	22	7	3	1	71.4949	22.7484	9.7493	3.24977
	Image 4	24	3	2	0	77.9944	9.7493	6.49954	0
	Image 5	23	5	3	0	74.7447	16.2488	9.7493	0
	Image 6	24	7	2	1	77.9944	22.7484	6.49954	3.24977
	Image 7	23	9	1	1	74.7447	29.2479	3.24977	3.24977
	Image 8	27	7	4	1	87.7437	22.7484	12.9991	3.24977
	Image 9	27	9	2	2	87.7437	29.2479	6.49954	6.49954
	Image 10	23	10	2	1	74.7447	32.4977	6.49954	3.24977
cKO Replicate 1	Image 1	14	1	3	0	45.4968	3.24977	9.7493	0
	Image 2	11	3	2	0	35.7474	9.7493	6.49954	0
	Image 3	14	3	3	0	45.4968	9.7493	9.7493	0
	Image 4	12	2	2	0	38.9972	6.49954	6.49954	0
	Image 5	16	5	3	0	51.9963	16.2488	9.7493	0
	Image 6	12	3	2	0	38.9972	9.7493	6.49954	0
	Image 7	14	3	3	0	45.4968	9.7493	9.7493	0
	Image 8	15	3	1	1	48.7465	9.7493	3.24977	3.24977
	Image 9	17	3	2	0	55.2461	9.7493	6.49954	0
	Image 10	18	4	3	0	58.4958	12.9991	9.7493	0
cKO Replicate 2	Image 1	18	3	2	2	58.4958	9.7493	6.49954	6.49954
	Image 2	19	5	2	2	61.7456	16.2488	6.49954	6.49954
	Image 3	20	5	3	1	64.9954	16.2488	9.7493	3.24977
	Image 4	19	8	2	1	61.7456	25.9981	6.49954	3.24977
	Image 5	15	3	2	1	48.7465	9.7493	6.49954	3.24977
	Image 6	14	6	2	2	45.4968	19.4986	6.49954	6.49954
	Image 7	20	6	3	1	64.9954	19.4986	9.7493	3.24977
	Image 8	21	7	1	2	68.2451	22.7484	3.24977	6.49954
	Image 9	17	7	3	0	55.2461	22.7484	9.7493	0
	Image 10	22	7	1	2	71.4949	22.7484	3.24977	6.49954
cKO Replicate 3	Image 1	20	9	3	1	64.9954	29.2479	9.7493	3.24977
	Image 2	20	11	4	0	64.9954	35.7474	12.9991	0
	Image 3	21	10	4	1	68.2451	32.4977	12.9991	3.24977
	Image 4	24	9	4	0	77.9944	29.2479	12.9991	0
	Image 5	24	12	2	1	77.9944	38.9972	6.49954	3.24977
	Image 6	21	10	3	1	68.2451	32.4977	9.7493	3.24977
	Image 7	18	8	5	1	58.4958	25.9981	16.2488	3.24977
	Image 8	24	8	3	1	77.9944	25.9981	9.7493	3.24977
	Image 9	15	7	2	3	48.7465	22.7484	6.49954	9.7493
	Image 10	15	10	2	1	48.7465	32.4977	6.49954	3.24977

## Sheet: P0
		Number in a 0.308 mm2 field					Number per mm2
		Placode	Germ	Peg	Long Peg	Hair follicle	Placode	Germ	Peg	Long Peg	Hair follicle
Ctrl Replicate 1	Image 1	0	28	20	20	18	0	90.9935	64.9954	64.9954	58.4958
	Image 2	0	30	19	16	16	0	97.493	61.7456	51.9963	51.9963
	Image 3	0	29	19	18	18	0	94.2433	61.7456	58.4958	58.4958
	Image 4	0	29	18	18	22	0	94.2433	58.4958	58.4958	71.4949
Ctrl Replicate 2	Image 1	0	18	29	16	20	0	58.4958	94.2433	51.9963	64.9954
	Image 2	0	24	24	22	16	0	77.9944	77.9944	71.4949	51.9963
	Image 3	0	25	26	16	20	0	81.2442	84.494	51.9963	64.9954
	Image 4	0	22	27	20	16	0	71.4949	87.7437	64.9954	51.9963
Ctrl Replicate 3	Image 1	0	26	20	23	21	0	84.494	64.9954	74.7447	68.2451
	Image 2	0	27	19	21	21	0	87.7437	61.7456	68.2451	68.2451
	Image 3	0	32	21	18	17	0	103.993	68.2451	58.4958	55.2461
	Image 4	0	37	31	21	19	0	120.241	100.743	68.2451	61.7456
	Image 5	0	30	26	20	26	0	97.493	84.494	64.9954	84.494
Ctrl Replicate 4	Image 1	0	30	27	23	21	0	97.493	87.7437	74.7447	68.2451
	Image 2	0	29	22	21	27	0	94.2433	71.4949	68.2451	87.7437
	Image 3	0	28	24	15	28	0	90.9935	77.9944	48.7465	90.9935
	Image 4	0	27	19	23	21	0	87.7437	61.7456	74.7447	68.2451
	Image 5	0	32	21	19	23	0	103.993	68.2451	61.7456	74.7447
cKO Replicate 1	Image 1	8	18	11	12	18	25.9981	58.4958	35.7474	38.9972	58.4958
	Image 2	9	18	18	15	22	29.2479	58.4958	58.4958	48.7465	71.4949
	Image 3	10	14	17	14	14	32.4977	45.4968	55.2461	45.4968	45.4968
	Image 4	11	16	14	15	17	35.7474	51.9963	45.4968	48.7465	55.2461
cKO Replicate 2	Image 1	6	14	17	24	20	19.4986	45.4968	55.2461	77.9944	64.9954
	Image 2	9	20	17	24	19	29.2479	64.9954	55.2461	77.9944	61.7456
	Image 3	7	15	19	18	17	22.7484	48.7465	61.7456	58.4958	55.2461
	Image 4	7	14	16	16	16	22.7484	45.4968	51.9963	51.9963	51.9963
	Image 5	9	17	24	12	21	29.2479	55.2461	77.9944	38.9972	68.2451
	Image 6	10	21	24	14	14	32.4977	68.2451	77.9944	45.4968	45.4968
cKO Replicate 3	Image 1	41	31	7	4	1	133.24	100.743	22.7484	12.9991	3.24977
	Image 2	42	27	14	6	5	136.49	87.7437	45.4968	19.4986	16.2488
	Image 3	36	26	15	8	4	116.992	84.494	48.7465	25.9981	12.9991
cKO Replicate 4	Image 1	32	23	14	18	15	103.993	74.7447	45.4968	58.4958	48.7465
	Image 2	24	27	17	16	18	77.9944	87.7437	55.2461	51.9963	58.4958
	Image 3	20	21	17	20	10	64.9954	68.2451	55.2461	64.9954	32.4977
	Image 4	33	23	20	16	12	107.242	74.7447	64.9954	51.9963	38.9972
	Image 5	24	28	22	11	12	77.9944	90.9935	71.4949	35.7474	38.9972
