# Supplementary material for: m6A RNA methylation impacts fate choices during skin morphogenesis
Source: eLife. 2020 Aug 26;9:e56980. doi: 10.7554/eLife.56980 (PMC7535931; doi:10.7554/eLife.56980)
Supplement: Figure 3—source data 1. [file elife-56980-fig3-data1.xlsx]

## Sheet: Sheet1
		Relative LEF1 fluorescence signal
		E17.5
		Ctrl			cKO
		Epi basal	HF WNThi	Dermal Condensate	Epi basal	HF WNThi	Dermal Condensate
Replicate 1	Image 1	1.2061	1.94827	2.39349	0.504626	1.08734	1.12591
	Image 2	1.22647	1.66024	1.7881	0.490861	0.846115	0.833694
	Image 3	1.37885	1.86324	2.05221	0.58656	0.94894	1.22623
	Image 4	1.18336	1.83916	2.04348	0.770104	1.29926	1.64278
	Image 5	1.10382	1.61061	1.90822	0.811854	1.42329	1.55158
	Image 6	1.03219	1.63724	1.79575	0.992908	1.54375	1.74927
	Image 7	0.877292	1.03229	1.35371	0.404842	0.582863	0.790431
Replicate 2	Image 1	0.517581	0.965367	1.43892	0.560078	0.863137	0.974526
	Image 2	0.47434	0.961615	1.06316	0.828072	1.32272	1.26759
	Image 3	0.806259	0.987674	1.04909	0.775282	1.29074	1.37237
	Image 4	0.998413	1.28975	1.07587	0.839054	1.45634	0.964297
	Image 5	1.16463	1.21143	1.30235	0.758468	1.322	1.63604
	Image 6	1.0895	1.61007	1.47306	0.64887	1.07583	1.33543
	Image 7	0.941204	1.6492	1.83911	0.458495	1.41972	1.72435
Replicate 3	Image 1	0.668872	2.16578	1.33295	0.68161	1.52547	1.61684
	Image 2	1.00552	1.33697	1.07167	0.733825	1.5154	1.74993
	Image 3	1.03227	2.01772	1.50146	0.619024	1.57963	1.55293
	Image 4	0.888414	2.16831	1.7927	0.820595	1.69015	1.34799
	Image 5	0.950735	2.69298	1.55797	0.873199	1.73804	1.60133
	Image 6	0.981195	1.24468	1.41335	0.695797	1.56811	1.66268
	Image 7	1.47299	2.06659	1.46729	0.681159	1.77529	1.50235
