# Supplementary material for: m6A RNA methylation impacts fate choices during skin morphogenesis
Source: eLife. 2020 Aug 26;9:e56980. doi: 10.7554/eLife.56980 (PMC7535931; doi:10.7554/eLife.56980)
Supplement: Figure 3—source data 2. [file elife-56980-fig3-data2.xlsx]

## Sheet: Sheet1
		Relative LEF1 fluorescence signal
		P0
		Ctrl			cKO
		Epi basal	HF WNThi	Dermal Condensate	Epi basal	HF WNThi	Dermal Condensate
Replicate 1	Image 1	0.90294	2.73324	2.28926	0.66906	2.3859	2.57971
	Image 2	0.994342	2.12536	1.97677	1.31225	1.4492	3.39036
	Image 3	0.826214	3.55992	2.3079	0.671956	2.76494	2.71975
	Image 4	0.890658	3.73253	3.92856	0.932381	2.22478	1.45636
	Image 5	1.09027	2.07058	1.979	0.74045	3.27985	1.92776
	Image 6	1.21542	2.33851	1.41	0.89097	2.96927	2.16125
	Image 7	0.782843	2.62331	3.4772	1.27283	1.85617	1.33122
Replicate 2	Image 1	0.778612	1.99165	2.83478	1.22387	2.01057	2.44219
	Image 2	1.22621	2.69973	4.11495	1.36469	1.80901	2.70857
	Image 3	0.447716	2.8777	3.79734	1.19391	2.96099	3.58957
	Image 4	0.930099	2.32431	1.94278	0.619828	2.2711	3.18761
	Image 5	0.762999	2.16721	2.23016	0.435365	2.01261	1.52552
	Image 6	1.28664	3.29115	4.43721	0.47871	1.7333	2.29944
	Image 7	1.13484	4.0128	4.56312	0.948768	1.94077	3.01163
Replicate 3	Image 1	1.00393	3.38317	1.4663	0.416924	1.91881	1.81129
	Image 2	0.572521	2.73009	4.1831	0.824825	1.93917	2.78495
	Image 3	1.15114	3.62899	4.36598	1.43836	2.80461	2.74954
	Image 4	1.32686	3.54687	2.7427	1.26796	2.30921	2.64621
	Image 5	1.12358	3.28461	3.45983	0.339432	2.30132	1.17675
	Image 6	1.18846	4.09432	4.71375	0.284347	1.27999	1.38976
	Image 7	1.3637	2.98015	3.11104	0.87088	2.21592	2.52591
