# Supplementary material for: m6A RNA methylation impacts fate choices during skin morphogenesis
Source: eLife. 2020 Aug 26;9:e56980. doi: 10.7554/eLife.56980 (PMC7535931; doi:10.7554/eLife.56980)
Supplement: Figure 4—figure supplement 1—source data 1. [file elife-56980-fig4-figsupp1-data1.xlsx]

## Sheet: Sheet1
Ctrl						cKO							Replicate 1
Placode & Germ			Peg			Placode & Germ			Peg				Replicate 2
Cleaved Caspase-3+	TUNEL+	Double+	Cleaved Caspase-3+	TUNEL+	Double+	Cleaved Caspase-3+	TUNEL+	Double+	Cleaved Caspase-3+	TUNEL+	Double+		Replicate 3
0	0	0	0	0	0	0	0	0	0	0	2
0	0	0	0	0	0	0	2	0	0	2	1
0	2	0	0	0	0	0	0	0	0	3	0
0	0	0	0	0	0	0	0	0	0	1	1
0	0	0	0	0	0	0	4	0	0	1	2
0	0	0	0	0	0	0	0	0	0	0	0
0	0	0	0	0	0	0	0	0	0	3	0
0	0	0	0	0	0	0	3	0	0	2	0
0	0	0	0	0	0	0	0	0	0	1	2
0	0	0	0	0	0	0	0	0	0	4	0
0	0	0	0	0	0	0	2	1	0	0	0
0	0	0	0	0	0	0	0	0	0	0	0
0	0	0	0	0	0	0	0	0	0	2	0
0	0	0	0	0	0	0	1	0	0	2	0
0	0	0	0	0	0	0	0	0	0	1	0
0	0	0	0	1	0	0	0	0	0	2	0
0	0	0	0	0	0	0	0	0	1	0	0
0	0	0	0	0	0	0	0	0	0	0	0
0	0	0	0	0	0	0	0	0	1	2	0
0	0	0	0	0	0	0	0	0	0	4	2
0	0	0	0	0	0	0	1	0	0	1	0
0	0	0	0	0	0	0	0	1	0	1	0
0	0	0	0	0	0	0	0	1	0	0	0
0	0	0	0	0	0	0	0	1	0	1	0
0	0	0	0	0	0	0	0	0	0	0	0
			0	0	0	0	0	1	0	0	1
			0	0	0	0	0	0	0	0	0
			0	0	0	0	0	0	0	0	0
			0	0	0	0	1	0	0	0	1
									0	3	1
									0	0	0
									0	0	4
