# Supplementary material for: m6A RNA methylation impacts fate choices during skin morphogenesis
Source: eLife. 2020 Aug 26;9:e56980. doi: 10.7554/eLife.56980 (PMC7535931; doi:10.7554/eLife.56980)
Supplement: Figure 4—figure supplement 1—source data 2. [file elife-56980-fig4-figsupp1-data2.xlsx]

## Sheet: Sheet1
Spindle Orientation measured from each cell
E17.5 HF WNThi
Ctrl	cKO
84	76
88	51
61	43
72	79
59	68
75	75
85	31
84	82
36	41
60	76
67	74
37	89
83	65
90	69
61	71
63	79
47	82
46	88
81	84
55	83
73	75
84	66
	83
