# Supplementary material for: m6A RNA methylation impacts fate choices during skin morphogenesis
Source: eLife. 2020 Aug 26;9:e56980. doi: 10.7554/eLife.56980 (PMC7535931; doi:10.7554/eLife.56980)
Supplement: Figure 6—figure supplement 2—source data 1. [file elife-56980-fig6-figsupp2-data1.xlsx]

## Sheet: Pcad
		HET	cKO
	Embryo 1	33965.3	34471.2
		21437.3	50908
		31410.6	54307
		33818	31179
		19390.4	39662
		13250.2	39958.3
		38454.6	54064.2
		51620.5	21780.4
		42300.9	31029.2
		35432.9	64913.2
		25366.1	20977.2
		27740.9	12068.9
		46228.7	12132
		82099.9	13121.1
		50904.1	13496.3
		34433.8	14427.1
		53602.8	23761.2
		36768.2	10460.8
		19679.2	14589.5
		24166.2	9585.33
		63287.2	38206
		37478.9	47825.7
		35460.4	36057.6
		99206	33837.9
		34857.2	27786
		29042.2	21194.7
		35966.8	19840.6
		51428.9	35979.2
		36641.9	36100.7
		45399.2	44253.8
		43718.2	60456
		81176.3	79366.8
		53565.9	46830.9
		33756.4	33687.1
		38427.1	64883.5
		24190.4	64793.6
		17545	99375.3
		25634.6	58084.9
		26638.4	128827
		28597.7	77487.4
		32797.6	107303
		18081.2	112335
		58257	94128.8
		39683.8	87167.9
		35800	44328.9
		25676.5	69234.6
		30378.3	85634.2
		35510	42493.8
		19596.4	66270.5
		31621.7	57428.2
		55996.5	45515.2
		35904.7	54572.3
		72574.1	58195.3
		40061.6	42324.3
		34830.2	55593.3
		40264.7	48592.1
		45541.8	49073.1
		31622.6	59528.5
		28774.7	44421.1
		27313
		27118.1	36538.5
		23249.8	45394.3
		32305.2	82796.6
		74590.2	52517.7
		34876.8	55732.2
		43479.2	83081.9
		32846.3	38894.8
		29065.5	35511.2
		26392.4	48742.9
		22556.8	53946.8
		32529.3	30750.3
		42754	49773.6
		25180	29166.2
		60296.4	70581.8
		14002.1	32124
		58890.2	42843.7
		20021	29680.6
		31611.6	45835.7
		16106.7	62491.8
		30560.6	42287.1
		24329	33781.9
		39193.8	34512.1
		31762.1	51141.6
		38947.9	24632.4
		38600.2	23103.1
		28742	45529.8
		27413.3	31434.4
		41232.7	72181.4
		30138.3	26655.5
		39651.2	51671.7
		65177.6	55672.5
		146841	102168
		114969	84771
		111585	59253.1
		64002.3	129735
		30090.3	70185.7
		27558.9	97352.6
		51945.1	58786.8
		64513	104760
		85634.1	67479.7
		36376.7	39250.5
		26174.3	38958.5
		13357.3	98231.1
		16172.7	48842.6
		20669.4	73338.4
		33572.1	102672
		26383.2	31299.8
		22564.5	59130.9
		23834.7	59530.6
		22783.8	37164.7
		37632.5	49282.9
		19226.5	25140.8
		19061.9	42844.4
		19569.4	40197.7
		37229.5	52640.1
		21907	42601.4
		12302.3	43855.5
		18293.2	42661.6
		22317.7	42587.9
		15654	34985.8
		38199.7	72664.9
		68337.4	68723
		64055.9	103912
		71611.7	56172.5
		103668	111121
		60161.6	79861
		62021.1	87856.4
		41143.3	147313
		23881.4	112988
		42417.7	95099
		55610.5	53451.4
		25795.2	63368.3
		26625.8	62388.9
		67092.5	37434
		32007.4	48109.2
		71564.9	52779.4
		57106.9	48955.2
		38400.2	73927.7
		37907.9	97087.6
		35041.8	60104.9
		24700.8	35415.9
		34820.1	42074.9
		55699.2	58519.4
		95711	36796.1
		65684.7	25554.7
		53186.5	66320.5
		59846.5	45246.5
		69025.8	57585.1
		39483.9	31947.4
		52632.2	75367.4
		75625.2	46753.2
		44009.5	47663
		44845	53245.2
		47069.6	121946
		48551.2	130298
		53205	72672.5
		76586	105201
		54760.6	51151.1
		47174.2	94022.2
		58513	60316.5
		40739.6	50443.2
		61723.2	32917.1
		18785.6	77518
		49921	62360.7
		51805.3	85332.6
		36381.1	58905
		40796.6	70758.2
		48695.5	47189.5
		40396.2	31798.3
		30002.2	49916.3
		23982.8	60038.7
		28871.9	43577.5
		29033.8	58979.3
		40835.3	52711.3
		32230.5	65405.8
		43161.4	45059
		45205.2	25673.3
		23669	52576.7
		26544.1	48002.2
		34390	53540.6
	Embryo 2	104325	107385
		82968.5	59670.2
		49704.8	77249.7
		118232	70740
		99368.3	62200.6
		100858	79118.6
		101257	89363.3
		116724	132373
		59346.5	117401
		50496.6	84797.7
		70650.9	50363.4
		49278.5	75631
		62094	42941.4
		75303.7	52861.3
		55693.7	72130.1
		86762.9	53919.6
		64031.6	39791.2
		66248.6	86099.4
		71857.6	77831.6
		79893.5	82802.9
		59657.8	46289.3
		64893.6	29094.2
		64332.8	46017.9
		71299.9	43538.4
		45732.8	49202.7
		112066	37649.1
		106596	49729.3
		91702.3	46080.9
		91902.1	71301.2
		44678.1	34839
		111465	36971.7
		87605.4	34196.7
		91783.1	56938
		43940	45169.6
		56243.9	55711.8
		88119.2	40665.4
		43840.1	51894.8
		62596.5	80514.9
		73848.3	33409
		27772.5	54223.7
		81438.4	50373.9
		103309	47299.1
		114075	71092.1
		108888	30335.8
		106412	47136.5
		117181	45130.3
		65696.6	72424.5
		57031.9	80363
		28261.9	56835.7
		37395.1	104509
		26693.1	65068.6
		30764.4	58534.4
		24013.3	50565.7
		12466.2	63982.3
		31152.4	52740.1
		21507.5	64283.1
		36488.4	85001.1
		39958.3	62813.4
		25329.2	33259.8
		43522.8	41372.8
		107500	116632
		41972.9	56262.1
		47108.3	54760.8
		57220.9	83544.8
		35231.1	92919.9
		114404	73420.1
		64521.2	41392.8
		88475.5	55974.5
		39544.9	101073
		70188.6	35509.2
		180588	67073
		128828	68084.9
		100319	62671.7
		126127	100943
		99678.5	70493.8
		277121	77220.4
		46757.8	67085.8
		130173	123388
		140583	102785
		62571.1	209599
		222731	92141
		147254	85639.1
		77178.3	51989.1
		131210	33977.8
		91643.3	55103.1
		80759.8	59665.6
		177332	103672
		121386	51249
		49944.6	45922.9
		55195	35568.1
		74744.8	49959.1
		51887.3	60740.5
		79485.3	93904.6
		84603.3	55215.7
		69303.4	56378
		111595	47268.4
		108865	61834
		91294.1	48400.9
		51871.6	74432.9
		104904	98255.9
		118328	38918.2
		157161	47591.1
		142160	25561
		111514	29417.7
		85859	53234.4
		94077	50938.3
		73972.4	32532.7
		87412.4	36226.6
		82540.1	47686.2
		100602	48224.9
		72080.9	55198.6
		121404	80390
		108885	65833.8
		98818	72230.6
		41005.5	65969.6
		58253.5	32403.7
		37339.8	57358.1
		26718.9	67217.4
		74812.4	20058.3
		82987.5	57424.2
		15625.3	66406.6
		18428.1	74289.4
		33121	66839.9
		30595.5	45983.6
		15064.4	64580.2
		39532.9	33311.4
		41870.1	68734.7
		21058.2	61961.6
		39178	44114.9
		33803.2	66520.3
		13329.9	38772.9
		19010	61704.5
		21954.1	47512.7
		33737.4	55840.7
		22128.3	39951.1
		43478.2	55843
		37486.6	44832.4
		32929.7	73372.1
		23294.6	21868.5
		30724.8	51132.2
		49897.7	39301.6
		36546	29517.8
		43045.4	24197.5
		46164.1	30821.7
		23106	8359.86
		29884.3	29076
		25634.4	15441.9
		32113.7	28497.9
		33096.3	35739.7
		36587.8	9653.82
		80833.2	93826.5
		57790.1	69896.9
		90198.1	73769.5
		67509.5	60455.8
		55135.6	91211.6
		36951.5	35937.3
		43887.9	68458.9
		63943.1	85932.1
		47230.5	62905.4
		59509	94535.6
		16274.4	56166.9
		29759.7	115568
		17540.4	59701.1
		16684.6	69255.3
		25125.9	70811.7
		29882.6	99097.7
		19133.5	88518.4
		19025.1	103281
		31517.2	96594.3
		35779.9	67466.9
		12619.3	186354
		21485.3	102221
		23156.4	61879.3
		36737.2	23588.5
		28896.5	51864.6
		18188.8	88936
		23538.1	49683
		14181.9	173592
		8995.62	97285.9
		9612.76	89824.6

## Sheet: ECAD
		HET	cKO
	Embryo 1	2669.53	7948.58
		2379.8	15834.8
		5041.22	11334.1
		7235.68	8763.14
		4508.56	12266.5
		1080.85	10168.1
		2792.94	18054.4
		7981.67	12207.4
		5413.08	3186.39
		6035.86	33873.7
		4078.02	6039.05
		4028.82	2928.64
		7118.5	3066.74
		9843.57	3138.41
		6122.66	3112.87
		5315.63	5149.5
		6747.63	6380.13
		4079.69	3663.63
		2090.39	4051.69
		2393.14	3992.26
		7835.5	4126.61
		3664.74	15952.7
		5857.15	8354.12
		10031.5	11850.8
		2878.2	9912.55
		5619.92	12337.7
		5128.32	7458.18
		5190	14576
		4499.34	9286.46
		6693.26	14156.6
		7418.29	14550.6
		14133.4	24978
		4705.46	13345.3
		3115.89	6522.57
		2937.98	13130.1
		6724.26	7183.53
		3190.21	11992.9
		5277.99	15099.6
		4676.46	20050.6
		3307.07	9971.94
		3676.21	18108.8
		2594.96	18083.6
		5500.77	11048.1
		4106.33	15988.3
		3673.95	6540.32
		2634.01	12681.6
		2413.68	16300.3
		3937.36	8637.94
		2358.76	18249.5
		3307.3	10142.6
		7544.38	11381.7
		7987.66	17367.8
		8916.87	14521.5
		6310.69	15233.1
		3561.66	13709.6
		4512.12	9715.63
		4827.22	8186.19
		3468.07	17683.4
		5185.87	14858.8
		5349.39
		4288.37	11955.7
		2784.84	16068.3
		3155.82	29658.9
		11808.5	16197.4
		7792.87	14670.5
		8020.52	22772.2
		5763	13655.1
		5416.06	9392.67
		3761.13	10474.7
		2401.37	14726.6
		3753.89	16277.8
		8126.77	11449.2
		6657.23	8445.39
		12486.5	16597.2
		2649.01	12085.7
		8241.12	4547.17
		3428.84	5795.79
		6668.54	10062.3
		2788.59	17625.3
		7997.71	10226.2
		5125.9	6969.49
		9349.5	3846.23
		7306.72	14836.7
		7606.8	6000.31
		5679.01	2831.12
		4791.72	16928.2
		6767.06	10989.6
		13578.9	18409.8
		7362.43	4181.18
		7368.81	21830.7
		7692.48	9278.84
		12754.3	12455.5
		9948.91	13316.9
		9633.49	8372.25
		8441.93	23588.1
		2516.27	9002.07
		3304.63	24438.4
		9450.4	15674.4
		6428.77	22535.6
		5933.61	13073.8
		7028.26	8810.7
		4704.05	8763.17
		3214.27	15356.6
		2324.58	8492.79
		3295.11	12284
		7022.62	21550.1
		7054.73	7080.68
		2691.51	11799.1
		1998.28	10026.3
		4385.38	9591.81
		6168.34	9096.97
		3505.32	3700.05
		3214.22	8056.4
		3866.77	5670.64
		5102.55	6633.86
		4150.11	5178.7
		650.295	7697.46
		3066.4	7233.33
		1881.78	9545.13
		2875.56	4414.82
		5599.6	18838.5
		7492.23	10202
		9210.48	23392.3
		8761.95	12339.1
		11795.8	27290.7
		7333.84	12050.2
		6837.91	14392.1
		5584.42	25895.4
		3533.24	24191.9
		7830.81	16954.7
		5641.43	15920
		2311.08	8417.38
		3826.43	16771.4
		12082.2	8752.48
		3548.41	8622.7
		13009.1	12227.5
		10326	8521.4
		7006.88	12983.2
		5427.35	19384.9
		3107.53	12686.3
		4893.58	10321.8
		4786.2	9986.82
		7598.41	10832.4
		11653.6	9265.84
		8106.12	5606.84
		5787.12	10611.7
		7305.94	8633.76
		9970.18	10714.1
		4635.27	5000.82
		12243.5	13167.1
		15628.9	8156.64
		6739.24	12786.3
		7931.13	11352.4
		6378.71	27520.5
		6750.75	26603.6
		10908.4	13117.2
		13414.1	22273.3
		9184.9	10665.3
		7576.04	26731.4
		9319.94	19398.8
		5150.83	11796.6
		7302.83	6736.21
		2699.08	12999.3
		8056.34	18082.5
		9886.29	17396.4
		7076.84	14991.8
		6633.27	12226.9
		8804.65	9712.47
		7442.95	8725.73
		5388.34	11543.6
		3693.23	25078.7
		5104.64	22138.9
		5816.13	17832.1
		9702.94	12307.1
		5732.08	16505.8
		3525.25	6631.1
		9361.1	5957.77
		6237.77	10391.3
		4934.27	12961.1
	Embryo 2	8330.69	20977.2
		16260.7	12865.2
		12131	5869.34
		6545.46	9927.21
		12057.1	9586.44
		13644.1	7324.91
		9218.24	9427.67
		15972	11122.4
		19220.5	11671.6
		6843.17	18586.7
		9844.25	9561.85
		10224.2	6467.42
		7403.71	13199.6
		9308.53	3838.41
		9893.41	11099.7
		6710.7	11812.4
		8447.27	12568.3
		10459.3	7245.74
		7859.51	11714.3
		9071.49	13624.6
		12557.8	11204.6
		6017.71	6267.66
		8382.69	5520.16
		10400.5	5136.71
		10102.4	10809
		6012.42	9624.89
		15524.6	5786.41
		14353.9	6567.75
		8017.57	8980.18
		12040.4	11498.2
		6153.64	7412.42
		9495.78	4426.49
		8115.32	4648.11
		12355.2	7996.99
		6696.31	8468.73
		6733.85	12640.8
		9961.82	6513.95
		5848.67	12939.1
		7183.65	10607.4
		6876.86	4531.25
		3194.92	10132.9
		11118.1	8767.58
		12653	8685.46
		16916.6	8701.72
		12740.4	5076.89
		13129.9	5597.82
		14562.1	5580.94
		8200.58	9516.25
		7549.66	13460.3
		4385.49	7079.58
		2935.78	14413.3
		3006.94	10651
		4901.92	7902.53
		3020.21	10506
		1634.64	7069.45
		3689.31	10283.3
		1981.35	12832.3
		4738.65	9856.06
		5122.03	10060.3
		2632.17	5935.5
		4293.51	3902.9
		12149.6	20463.6
		8243.72	15172.3
		5321.44	9174.64
		7837.03	11371.8
		5018.56	11710
		19403.4	14231.4
		6386.4	8721.21
		8810.8	10121.3
		5512.99	16413.7
		8224.29	7921.93
		16195.7	17078.7
		15779.1	11944.5
		10728.5	9836.66
		18738	9468.66
		18216.5	8331.16
		45363.4	15446.9
		6145.3	10076.4
		26072.3	13234.5
		22064.2	7366.22
		7682.88	31739.1
		40488.5	14140.2
		21979.4	10784
		15290.9	11551.2
		23071.8	5902.48
		12893.6	4651.92
		12268.3	6474.18
		26401	15307.4
		16342.2	4372.01
		8087.11	7878.67
		5731.43	7205.44
		9244.47	5944.13
		8497.42	6861.1
		6409.87	14538
		9448.82	6111.38
		8463.48	4853.08
		19270.8	10845.8
		19519.5	10761.3
		7827.15	6073.06
		5874.4	9633.6
		13817	7380.02
		15964	6196.2
		22999	8731.65
		25778.6	5319.75
		15303.2	9535.41
		11339	4918.71
		13379.7	8887.7
		8369.32	6301.94
		9863.75	6507.38
		16748.5	8047.1
		11022.5	4976.29
		8822.29	5677.61
		12162.2	8736.67
		11358.6	9458.37
		9209.1	11947.5
		4288.55	11712.5
		5800.93	7160.4
		4418.86	11767
		2945.59	10919.2
		5460.7	3772.94
		7807.91	10119.8
		1857.25	12101.2
		1444.26	13185.2
		2120.89	10376.1
		2483.71	10603
		2106.25	12634.3
		5067.5	8633.09
		5802.1	9944.5
		3200.33	9449.49
		4184.82	9351.91
		4916.01	12198.7
		1557.71	7244.87
		2454	14160.3
		2011.13	9553.7
		3929.34	9781.32
		1579.36	10397.6
		6302.31	9011.95
		6716.99	14686.9
		3152.47	8970.06
		2436.84	5866.38
		3634.67	8447.93
		4682.05	8311.64
		2472.77	6192.92
		4665.03	4850.8
		4033.71	5392.13
		2437.55	2158.26
		3347.38	6244.76
		1925.51	2725.35
		2737.63	7888.65
		2978.51	6692.46
		4049.06	2272.26
		7948.34	22087.6
		7242.98	22713.5
		6197.14	11849.9
		5252.65	12156.4
		5613.28	11562.8
		4586.09	4069.78
		3602.59	5430.08
		8795.69	9785.05
		6262.9	9610.18
		7788.03	17710.6
		1650.07	8496.26
		3757.01	17687.3
		3258.77	10850.5
		1674.65	9280.07
		1974.85	16865.4
		3034.05	15985.9
		2915.79	7995.29
		2905.94	22743.7
		3139.46	9270.99
		4839.9	8984.55
		1922.47	17472.9
		3716.07	11081.6
		2367.53	7568.25
		2456.25	2976.35
		3831.05	5618.64
		2268.73	11399.7
		2414.76	7990.93
		1561.19	16014.3
		672.292	10404.3
		556.949	11848.8

## Sheet: PCAD_ECAD_Ratio
		HET	cKO
	Embryo1	12.7233	4.33677
		9.00801	3.21495
		6.23075	4.79148
		4.67378	3.55797
		4.3008	3.23335
		12.2591	3.92978
		13.7685	2.99451
		6.46738	1.7842
		7.81458	9.73802
		5.8704	1.91633
		6.22021	3.4736
		6.88561	4.12098
		6.49417	3.95598
		8.34046	4.18081
		8.31406	4.33563
		6.47783	2.80164
		7.94395	3.72425
		9.0125	2.85532
		9.41411	3.60085
		10.0981	2.40098
		8.07698	9.25843
		10.2269	2.99797
		6.05421	4.31614
		9.88941	2.85532
		12.1108	2.80311
		5.16772	1.71789
		7.01336	2.66025
		9.90924	2.46839
		8.14383	3.88745
		6.78282	3.12601
		5.89329	4.15487
		5.74358	3.17747
		11.3838	3.50918
		10.8336	5.16469
		13.0794	4.94158
		3.59748	9.01975
		5.49962	8.28619
		4.85689	3.8468
		5.69627	6.42507
		8.64744	7.77055
		8.92156	5.92546
		6.96781	6.21199
		10.5907	8.51994
		9.66406	5.45199
		9.74427	6.77779
		9.74805	5.45947
		12.5859	5.25354
		9.01874	4.91944
		8.30794	3.63137
		9.56118	5.66208
		7.42228	3.99899
		4.49503	3.14215
		8.13896	4.00752
		6.34822	2.77844
		9.7792	4.05508
		8.92366	5.00144
		9.43437	5.99462
		9.11821	3.36635
		5.54867	2.98955
		5.10583
		6.32365	3.05616
		8.34871	2.82509
		10.2367	2.79163
		6.31668	3.24236
		4.47547	3.79894
		5.421	3.64839
		5.69951	2.84836
		5.36654	3.78073
		7.01714	4.65339
		9.39329	3.66322
		8.66548	1.8891
		5.26088	4.34733
		3.78235	3.45351
		4.82893	4.25265
		5.28579	2.65802
		7.1459	9.42206
		5.839	5.12106
		4.74041	4.55517
		5.77593	3.54558
		3.82117	4.13516
		4.7463	4.84712
		4.19208	8.97296
		4.34696	3.44697
		5.12015	4.10518
		6.79699	8.16043
		5.99827	2.68959
		4.05098	2.86037
		3.03652	3.92081
		4.09352	6.37512
		5.38095	2.36693
		8.47291	5.99994
		11.5131	8.20262
		11.5559	6.36566
		11.583	7.07732
		7.58148	5.50001
		11.9583	7.79662
		8.33947	3.98359
		5.4966	3.75051
		10.035	4.64864
		14.432	5.16144
		5.17577	4.45487
		5.56421	4.44571
		4.15561	6.39666
		6.95723	5.75106
		6.27274	5.97023
		4.78057	4.76433
		3.73979	4.42045
		8.38358	5.01149
		11.9276	5.93744
		5.19538	3.87463
		6.10092	5.4175
		5.48495	6.79471
		5.93048	5.31806
		5.06091	7.08875
		7.29625	7.93507
		5.27866	8.22628
		18.918	5.6974
		5.96568	5.89792
		11.8599	4.46174
		5.44381	7.92463
		6.82186	3.85725
		9.12111	6.73624
		6.95468	4.44216
		8.17303	4.55241
		8.78854	4.07175
		8.20328	6.62738
		9.0702	6.10451
		7.36752	5.68877
		6.75907	4.67049
		5.41677	5.60899
		9.85753	3.3575
		11.1615	7.52827
		6.95838	3.71997
		5.55299	4.27696
		9.02021	5.57937
		5.50114	4.31646
		5.53039	5.74498
		5.48035	5.69412
		6.98461	5.00841
		11.2764	4.73777
		5.04758	3.43118
		7.2751	4.21305
		7.33037	5.40224
		8.21297	3.97116
		8.1031	4.55778
		9.19048	6.24973
		8.19148	5.24064
		6.92322	5.37472
		8.51815	6.38844
		4.2988	5.7239
		4.83879	5.73192
		6.53034	3.72767
		5.65429	4.6902
		7.37917	4.43108
		7.19197	4.89776
		4.87744	5.54026
		5.70938	4.72318
		5.96203	4.79604
		6.22676	3.5173
		6.27826	3.10929
		7.90932	4.27607
		8.45196	4.88659
		6.95998	5.96323
		6.19649	3.44867
		5.24012	4.90518
		5.14087	3.92916
		6.15029	5.78711
		5.53065	4.85865
		5.42745	3.64421
		5.56798	4.32416
		6.49372	2.39401
		5.656	1.96837
		4.99195	3.30747
		4.20855	4.28299
		5.62282	3.96261
		12.2435	6.7951
		4.82905	4.3092
		3.79447	5.05966
		5.37953	3.70357
		4.12811	2.55232
	Embryo 2	6.41574	8.34694
		6.83938	10.1664
		7.59378	7.78161
		9.80599	7.37917
		7.28289	8.49165
		10.9411	8.39217
		6.33965	8.03453
		6.07287	11.3414
		8.67237	6.31643
		5.12955	8.86834
		6.91019	7.78724
		6.65592	5.72979
		6.67065	11.1873
		7.6115	4.76239
		8.29923	6.10629
		10.2711	4.29012
		6.122	5.49167
		8.4291	7.34995
		7.92125	5.71257
		6.36205	7.39009
		9.9137	7.38542
		7.74139	5.27053
		6.18556	8.95863
		7.05773	4.02798
		7.60638	5.11203
		7.21859	6.50648
		7.42627	7.57173
		11.4377	5.1314
		7.63283	6.20106
		7.26043	4.70009
		11.7384	8.35237
		10.7951	7.35712
		7.42869	7.11994
		6.56182	5.33369
		8.35241	4.4073
		8.8457	6.24282
		7.49574	4.01069
		8.71375	7.59048
		10.7387	7.37302
		8.69272	5.35123
		7.32484	5.74547
		8.16482	5.44578
		6.74337	8.1699
		8.54664	5.97528
		8.10454	8.42051
		8.047	8.0865
		8.01121	7.61062
		7.55424	5.97037
		6.4444	8.02811
		12.7377	7.25086
		8.87714	6.10917
		6.27599	7.40705
		7.9509	4.81303
		7.62628	9.05054
		8.44395	5.12871
		10.855	5.00947
		7.70018	8.62425
		7.80126	6.24368
		9.62296	5.60354
		10.1369	10.6005
		8.84801	5.69951
		5.0915	3.7082
		8.85255	5.96872
		7.30135	7.34664
		7.02015	7.93507
		5.89605	5.15903
		10.1029	4.74622
		10.0417	5.53036
		7.17304	6.15785
		8.53431	4.48239
		11.1503	3.92729
		8.16447	5.70009
		9.35067	6.37124
		6.73108	10.6607
		5.47189	8.46147
		6.10891	4.99908
		7.60871	6.65772
		4.99277	9.32325
		6.37154	13.9535
		8.14423	6.60381
		5.50108	6.51625
		6.69962	7.94132
		5.04735	4.50075
		5.68703	5.75653
		7.10763	11.8452
		6.5828	9.21594
		6.71687	6.77266
		7.42778	11.7221
		6.17583	5.82876
		9.63024	4.93628
		8.08535	8.40478
		6.10624	8.85287
		12.4005	6.45924
		8.95385	9.0349
		8.18852	11.617
		5.79089	4.35823
		5.57724	5.74595
		11.6638	7.96978
		8.83011	7.72638
		7.59236	13.3138
		7.41219	6.28098
		6.83339	5.45042
		5.51465	4.80492
		7.28696	3.0851
		7.57203	10.8228
		7.0313	5.73132
		8.83852	5.16233
		8.86199	5.56701
		4.92821	5.92589
		9.12691	9.69093
		8.17032	9.72216
		9.98204	9.20145
		9.58619	6.96038
		10.7305	6.04567
		9.56164	5.63242
		10.0421	4.52541
		8.45009	4.87448
		9.07081	6.1559
		13.7001	5.31636
		10.6286	5.67445
		8.41312	5.4876
		12.7595	5.63431
		15.6165	6.44174
		12.3185	4.33684
		7.15224	5.11149
		7.80126	3.85857
		7.21636	6.91183
		6.58	6.55714
		9.36194	4.71721
		6.87615	5.45307
		8.55733	5.35178
		7.74652	4.35758
		10.9163	4.97323
		8.586	5.7089
		14.0109	3.84235
		6.89877	6.19655
		5.58087	3.05253
		10.4457	8.17966
		9.55933	3.72777
		8.45324	6.05263
		10.6572	4.7285
		14.7794	4.76638
		9.22725	4.98835
		11.4446	5.71605
		9.4792	3.87342
		8.92769	4.65606
		13.313	5.66603
		11.7305	3.61251
		11.1117	5.34029
		9.03611	4.24856
		10.1698	4.24792
		7.97877	3.07733
		14.5548	6.22535
		12.8525	4.97318
		9.82236	7.88835
		8.0573	8.83029
		12.1823	12.6073
		7.26983	8.78199
		7.54132	6.5457
		7.64109	5.33781
		9.86283	6.61078
		7.92109	6.53392
		5.38253	5.50215
		9.96306	7.46279
		12.7229	4.19863
		9.84909	6.19906
		6.56204	11.0713
		6.54696	4.5411
		10.0391	10.419
		7.39268	7.50921
		6.56407	10.6653
		5.78173	9.22443
		9.78083	8.17618
		14.9566	7.92531
		7.5427	9.23082
		8.0172	7.80164
		9.74759	6.21742
		9.08401	10.8398
		13.3805	9.35055
		17.2597	7.58088
