# Supplementary material for: m6A RNA methylation impacts fate choices during skin morphogenesis
Source: eLife. 2020 Aug 26;9:e56980. doi: 10.7554/eLife.56980 (PMC7535931; doi:10.7554/eLife.56980)
Supplement: Figure 6—figure supplement 2—source data 2. [file elife-56980-fig6-figsupp2-data2.xlsx]

## Sheet: EdU ratio
		Ratio of EdU+ cells among Epi basal cells
		Ctrl	cKO
Replicate 1	Image 1	0.1	0.133333
	Image 2	0.133333	0.25
	Image 3	0	0.352941
	Image 4	0.12	0
	Image 5	0.0416667	0.0833333
	Image 6	0.185185	0.272727
	Image 7	0.263158	0.347826
	Image 8	0.0909091	0.142857
	Image 9	0.05	0.0833333
	Image 10	0.0434783	0.0625
Replicate 2	Image 1	0.103448	0.133333
	Image 2	0.166667	0.133333
	Image 3	0.0666667	0.333333
	Image 4	0.157895	0.357143
	Image 5	0.0833333	0.304348
	Image 6	0	0.35
	Image 7	0.142857	0.208333
	Image 8	0.0625	0.142857
	Image 9	0.222222	0
	Image 10	0.1	0.0714286
Replicate 3	Image 1	0.208333	0.2
	Image 2	0.0434783	0.0666667
	Image 3	0.153846	0.4375
	Image 4	0.125	0.3
	Image 5	0.0555556	0
	Image 6	0.0833333	0.5
	Image 7	0.142857	0.217391
	Image 8	0.0384615	0.375
	Image 9	0.25	0.444444
	Image 10	0.222222	0.4

## Sheet: Cell number ratio
		Ratio of suprabasal cell # to basal cell #
		Ctrl	cKO
Replicate 1	Image 1	1.03333	1.53333
	Image 2	1	1.95
	Image 3	1.05	1.76471
	Image 4	0.92	2
	Image 5	1.5	1.5
	Image 6	0.962963	1.27273
	Image 7	0.842105	1.30435
	Image 8	1.22727	1.14286
	Image 9	0.85	1.66667
	Image 10	1.13043	1.375
Replicate 2	Image 1	1	1.13333
	Image 2	1.25	1.43333
	Image 3	1	1.86667
	Image 4	1.05263	2.42857
	Image 5	1.20833	1.6087
	Image 6	1.05882	1.7
	Image 7	1.04762	1.5
	Image 8	1.375	1.85714
	Image 9	1.22222	1.69231
	Image 10	1.1	2
Replicate 3	Image 1	1.33333	1.46667
	Image 2	0.913043	1.53333
	Image 3	1.23077	1.75
	Image 4	1.25	2.8
	Image 5	1.33333	1
	Image 6	1.29167	2
	Image 7	1.42857	2.6087
	Image 8	1.5	1.8125
	Image 9	1.41667	2.44444
	Image 10	1.61111	1.8
Replicate 4	Image 1	0.933333	1.46667
	Image 2	1.52941	1.2
	Image 3	0.727273	1.5625
	Image 4	0.95	1.27273
	Image 5	0.888889	1.18182
	Image 6	1	1.73333
	Image 7	1.33333	1.66667
	Image 8	1	1.6
	Image 9	1.35294	1.55556
	Image 10	1.58333	2
Replicate 5	Image 1	0.904762	1.6
	Image 2	1.125	1.33333
	Image 3	1.26667	1.1
	Image 4	0.772727	1.56
	Image 5	0.894737	1.69231
	Image 6	1.0625	1.75
	Image 7	1.05556	2.5
	Image 8	1.41667	1.60714
	Image 9	1	2.25
	Image 10	1.85714	1.8125
