# Supplementary material for: m6A RNA methylation impacts fate choices during skin morphogenesis
Source: eLife. 2020 Aug 26;9:e56980. doi: 10.7554/eLife.56980 (PMC7535931; doi:10.7554/eLife.56980)
Supplement: Figure 6—figure supplement 2—source data 3. [file elife-56980-fig6-figsupp2-data3.xlsx]

## Sheet: Sheet1
Projected cellular area (um2)
Ctrl	cKO
1016.4	1015.15
1424.76	1042.92
819.309	899.342
991.284	738.522
1040.66	631.682
1417.03	579.211
1000.49	601.416
1085.43	884.807
898.952	978.049
1188.04	625.702
1586.41	588.337
1258.66	604.614
1148.26	891.126
984.549	886.055
1107.8	758.622
788.029	725.938
884.573	890.892
1322.72	1027.17
1311.36	709.037
1499.09	927.19
1643.51	758.284
1007.07	539.168
1195.5	770.946
1056.23	640.965
1680.53	883.871
1471.87	843.647
1193.63	576.221
1008.6	564.858
728.538	728.304
1246.98	872.69
1071.81	882.571
1559.5	1084.97
928.594	733.998
1322.62	929.894
1001.01	896.508
969.962	1061.7
1165.1	634.1
1011.1	801.836
1030.47	938.708
917.855	808.493
885.535	894.324
577.547	861.718
969.182	849.393
840.631	589.247
1208.42	728.798
849.003	685.557
1112.58	518.913
944.949	544.837
1029.92	735.558
902.436	635.114
814.291	566.314
1249.09	774.067
1238.4	663.586
1183.88	792.606
1471.09	826.642
792.996	789.537
1419.01	710.623
1078.18	603.678
1246.93	650.923
892.764	699.234
886.575	759.22
701.938	812.159
793.776	602.17
1112.74	1019.99
1136.79	631.292
861.952	724.508
866.632	745.803
1048.83	443.509
1363.37	782.569
1027.56	719.775
1423.77	664.678
920.507	837.588
1241.84	772.636
1384.58	563.454
1011.83	508.331
1197.01	715.147
712.729	772.74
1266.9	1028
1134.24	488.699
1251.79	565.404
1206.03	702.146
952.567	780.541
1509.62	808.311
720.529	478.845
1313.91	353.829
1395.61	699
1271.55	538.596
1034.65	694.554
999.318	815.539
1229.54	751.939
1892.08	484.019
1267.16	603.314
684.725	802.408
1685.6	1182.16
1679.75	513.245
1215.96	653.835
1397.51	809.481
1098.57	1058.39
856.881	693.956
1084.91	709.765
1134.63	954.699
1086.21	646.243
996.12	669.046
1147.99	535.996
1356.29	1088.09
1206.13	844.115
1309.93	647.595
514.493	746.713
779.605	698.558
1207.62	573.438
1009.3	684.283
1200.8	860.262
789.927	592.082
1117.94	616.809
1077.01	603.834
927.19	610.543
1065.99	1214.69
1106.37	1117.11
1036.14	1020.27
1038.58	727.706
828.462	558.176
1492.85	783.245
1231.07	887.745
1104.78	729.656
1137.33	838.108
1014.37	751.861
1060.01	552.507
1016.66	578.171
885.275	744.633
