# Supplementary material for: m6A RNA methylation impacts fate choices during skin morphogenesis
Source: eLife. 2020 Aug 26;9:e56980. doi: 10.7554/eLife.56980 (PMC7535931; doi:10.7554/eLife.56980)
Supplement: Figure 6—figure supplement 2—source data 4. [file elife-56980-fig6-figsupp2-data4.xlsx]

## Sheet: Sheet1
	Basal			S1			LG
	Cleaved Caspase-3+	TUNEL+	Double+	Cleaved Caspase-3+	TUNEL+	Double+	Cleaved Caspase-3+	TUNEL+	Double+
Ctrl Replicate 1	0	0	0	0	0	0	0	0.416667	0
Ctrl Replicate 1	0	0	0	0	0	0	0	0	0
Ctrl Replicate 1	0	0	0	0	0	0	0	0	0
Ctrl Replicate 1	0	0	0	0	0	0	0	1	0
Ctrl Replicate 1	0	0	0	0	0	0	0	1	0
Ctrl Replicate 1	0	0.08	0	0	0	0	0	0	0
Ctrl Replicate 1	0	0	0	0	0	0	0	0.0833333	0
Ctrl Replicate 1	0	0	0	0	0	0	0	0.333333	0
Ctrl Replicate 1	0	0	0	0	0	0	0	0.3	0
Ctrl Replicate 1	0	0	0	0	0	0	0	0.6	0
Ctrl Replicate 2	0	0	0.047619	0	0	0	0	0	0
Ctrl Replicate 2	0	0	0	0	0.0625	0	0	0	0
Ctrl Replicate 2	0	0	0	0	0	0	0	0	0
Ctrl Replicate 2	0	0	0	0	0	0	0	0	0
Ctrl Replicate 2	0	0	0	0	0	0	0.0909091	0	0
Ctrl Replicate 2	0	0	0	0	0	0	0	0.5	0
Ctrl Replicate 2	0	0	0	0	0	0	0	0	0
Ctrl Replicate 2	0	0	0	0	0	0	0	0	0
Ctrl Replicate 2	0	0	0	0	0	0	0	0.25	0
Ctrl Replicate 2	0	0	0	0	0	0	0	0.222222	0
Ctrl Replicate 3	0	0	0	0	0	0	0	0	0
Ctrl Replicate 3	0	0	0	0	0	0	0	0	0
Ctrl Replicate 3	0	0	0	0	0	0	0	0	0
Ctrl Replicate 3	0	0	0	0	0	0	0	0	0
Ctrl Replicate 3	0	0	0.0416667	0	0	0	0	0.166667	0
Ctrl Replicate 3	0	0	0	0	0.0666667	0	0.125	0.5	0
Ctrl Replicate 3	0	0	0	0	0	0	0	1	0
Ctrl Replicate 3	0	0	0	0	0	0	0	0	0
Ctrl Replicate 3	0	0	0	0	0	0	0	0	0
Ctrl Replicate 3	0	0	0	0	0	0	0	0	0
cKO Replicate 1	0	0	0	0	0.0454545	0	0	0	0
cKO Replicate 1	0	0	0	0	0.04	0	0	0	0
cKO Replicate 1	0	0	0.0416667	0	0	0	0	0	0
cKO Replicate 1	0	0	0	0	0	0	0	0	0
cKO Replicate 1	0	0	0	0	0	0	0	0	0
cKO Replicate 1	0	0	0	0	0	0	0	0	0
cKO Replicate 1	0	0	0	0	0	0	0	0	0
cKO Replicate 1	0	0.0454545	0	0	0.0555556	0	0	0	0
cKO Replicate 1	0	0	0	0	0.0344828	0	0	0	0
cKO Replicate 1	0	0	0	0	0.05	0	0	0	0
cKO Replicate 2	0	0.0666667	0	0.0333333	0.0666667	0	0	0	0
cKO Replicate 2	0	0	0	0	0.0769231	0	0	0	0
cKO Replicate 2	0	0	0	0	0.15	0	0	0	0
cKO Replicate 2	0	0	0	0	0.0416667	0	0	0	0
cKO Replicate 2	0	0	0	0.0416667	0.0416667	0	0	0	0
cKO Replicate 2	0	0	0	0	0	0	0	0.375	0
cKO Replicate 2	0	0	0	0	0.08	0	0	0	0
cKO Replicate 2	0	0	0	0	0.0416667	0	0	0	0
cKO Replicate 2	0	0	0	0	0.12	0.04	0	0	0
cKO Replicate 2	0	0	0	0	0	0	0	0	0
cKO Replicate 3	0	0	0	0	0	0	0	0.625	0
cKO Replicate 3	0	0	0	0	0	0	0	0.133333	0
cKO Replicate 3	0	0	0	0	0	0	0	0.0909091	0
cKO Replicate 3	0	0	0	0	0	0	0	0.0714286	0
cKO Replicate 3	0	0	0	0	0	0	0	0.047619	0
cKO Replicate 3	0	0.04	0	0	0.0416667	0	0	0	0
cKO Replicate 3	0	0	0	0	0	0	0	0.0833333	0
cKO Replicate 3	0	0	0	0	0	0	0	0	0
cKO Replicate 3	0	0	0	0	0	0	0	0	0
cKO Replicate 3	0	0.0555556	0	0	0.2	0	0	0	0
