# Supplementary material for: m6A RNA methylation impacts fate choices during skin morphogenesis
Source: eLife. 2020 Aug 26;9:e56980. doi: 10.7554/eLife.56980 (PMC7535931; doi:10.7554/eLife.56980)
Supplement: Figure 6—source data 1. [file elife-56980-fig6-data1.xlsx]

## Sheet: Sheet1
Target		Ctrl	cKO
Lef1	Replicate 1	1.07371	0.748767
	Replicate 2	0.967846	0.713884
	Replicate 3	0.962294	0.641966
