# Supplementary material for: m6A RNA methylation impacts fate choices during skin morphogenesis
Source: eLife. 2020 Aug 26;9:e56980. doi: 10.7554/eLife.56980 (PMC7535931; doi:10.7554/eLife.56980)
Supplement: Figure 6—source data 2. [file elife-56980-fig6-data2.xlsx]

## Sheet: Sheet1
Figure 6D - Quantifications of HES1 positive cells on each layer
	HET B	HET SB1	HET SB2		cKO B	cKO SB1	cKO SB2
Embryo 1	0.190476	0.722222	0.769231	Embryo 1	0.0714286	0.923077	0.947368		B - Basal
	0	0.705882	0.846154		0.0952381	0.741935	0.466667		SB1 - Suprabasal
	0.243902	0.666667	0.833333		0.318182	0.512195	0.608696		SB2 - Suprabasal
	0.2	0.923077	0.75		0.0909091	0.8	0.647059
	0.1	0.857143	0.666667		0.357143	0.59375	0.8
	0.225806	0.846154	0.75		0.216216	0.727273	N/A
	0.222222	0.75	0.7		0.0645161	0.923077	N/A
	0.121212	0.882353	0.833333		0.166667	0.727273	N/A
	0.0952381	0.8	0.75		0.15625	0.869565	N/A
	0.102564	0.75	0.7		0.0322581	0.740741	N/A
	0.0645161	0.8	0.692308		0.111111	0.62069	0.727273
	0.0882353	1	0.583333		0.210526	0.928571	0.758621
	0.146341	0.636364	0.625		0.179487	0.794118	0.736842
	0.0526316	0.818182	0.727273		0.292683	0.633333	0.814815
	0.0882353	0.75	0.588235		0.184211	0.735294	0.4
	0.0285714	0.894737	0.454545		0	0.647059	0.666667
	0.097561	0.777778	0.647059		0.0188679	0.7	0.782609
	0.0731707	0.85	0.444444		0.162791	0.59375	0.909091
	0.108108	0.941176	0.615385		0.05	0.625	0.666667
	0.102564	0.9	0.769231		0.181818	0.65625	0.714286
	0.111111	0.846154	0.642857		0.138889	0.705882	0.583333
	0.0465116	0.833333	0.533333		0.128205	0.703704	0.8
	0.0930233	0.8	0.823529		0.2	0.677419	0.791667
	0	1	0.615385		0.102564	0.692308	0.705882
	0	0.8125	0.785714		0.2	0.65625	0.823529
	0.15625	1	0.818182		0.111111	0.653846	0.666667
	0.025	0.8	0.6		0.184211	0.764706	0.724138
	0.135135	0.944444	0.666667		0.108696	0.666667	0.384615
	0.105263	0.947368	0.625		0.097561	0.882353	0.681818
Embryo 2	0.183673	0.952381	0.291667		0.0769231	0.607143	0.73913
	0.1	0.913043	0.37037	Embryo 2	0.142857	0.533333	0.642857
	0.127273	0.833333	0.434783		0.108108	0.705882	0.352941
	0.0612245	0.904762	0.26087		0.0285714	0.714286	0.222222
	0.206349	0.925926	0.52381		0.075	0.958333	0.5
	0.175	0.857143	0.421053		0.075	0.758621	0.363636
	0.0243902	0.85	0.578947		0.147059	0.666667	0.538462
	0.0851064	0.869565	0.409091		0.0833333	0.8	0.666667
	0.119048	0.789474	0.285714		0	0.875	0.529412
	0.254902	0.933333	0.25		0.15	0.769231	0.529412
	0.322581	0.833333	0.0909091		0.206897	0.866667	0.272727
	0.135135	0.833333	0.409091		0.257143	0.928571	0.266667
	0.176471	0.8	0.423077		0.097561	0.904762	0.291667
	0.208333	0.925926	0.357143		0.25	0.967742	0.55
	0	0.888889	0.125		0.125	0.785714	0.52381
	0.0357143	0.904762	0.444444		0.0909091	0.931034	0.318182
	0.0555556	0.875	0.5625		0.148148	0.913043	0.352941
	0.114286	1	0.368421		0.222222	0.857143	0.333333
	0.113208	0.769231	0.52381		0.08	0.84	0.32
	0.0212766	0.925926	0.5		0.357143	0.75	0.391304
	0.0980392	0.925926	0.647059		0.104167	0.782609	0.409091
	0.0666667	0.90625	0.631579		0.0540541	0.857143	0.277778
	0.151515	0.956522	0.636364		0.257143	0.75	0.529412
	0.119048	0.785714	0.764706		0.0344828	0.882353	0.375
	0.0952381	0.866667	0.692308		0.125	0.916667	0.5
	0.0681818	0.961538	1		0.105263	0.909091	0.269231
	0.146341	0.961538	0.533333		0.0961538	0.8125	0.259259
	0.0833333	0.863636	0.411765
	0.0444444	0.789474	0.529412
