# Supplementary material for: m6A RNA methylation impacts fate choices during skin morphogenesis
Source: eLife. 2020 Aug 26;9:e56980. doi: 10.7554/eLife.56980 (PMC7535931; doi:10.7554/eLife.56980)
Supplement: Figure 6—source data 3. [file elife-56980-fig6-data3.xlsx]

## Sheet: Sheet1
		Ratio of suprabasal EdU+ cell # to basal BrdU+ cell #
		Ctrl	cKO
Replicate 1	Image 1	1.14286	1.16667
	Image 2	1.33333	1.55556
	Image 3	3	1.6
	Image 4	0	1.625
	Image 5	1.42857	1
	Image 6	2	0.25
	Image 7	0.625	1
	Image 8	0.833333	1.15385
	Image 9	1.25	0.875
	Image 10	1.25	1.75
Replicate 2	Image 1	1.75	1
	Image 2	0.6	1.27273
	Image 3	2.5	1.2
	Image 4	1.33333	0.454545
	Image 5	0.5	1.8
	Image 6	0.8	2
	Image 7	0.666667	1
	Image 8	0.75	3.2
	Image 9	1	1.90909
	Image 10	1	0.9
Replicate 3	Image 1	1	1.72727
	Image 2	0.5	1.6
	Image 3	1.5	1.14286
	Image 4	1	0.666667
	Image 5	2.5	3.125
	Image 6	0.75	1.52632
	Image 7	1.5	1.2
	Image 8	1.5	1
	Image 9	1	1
	Image 10	1.57143	2.8
Replicate 4	Image 1	0.75	1.66667
	Image 2	1.83333	1.71429
	Image 3	0.666667	1.63636
	Image 4	0.6	1
	Image 5	1	2
	Image 6	0.777778	2.33333
	Image 7	1.4	2.57143
	Image 8	1.33333	1.77778
	Image 9	1.1	3.25
	Image 10	1	1.75
