# Supplementary material for: m6A RNA methylation impacts fate choices during skin morphogenesis
Source: eLife. 2020 Aug 26;9:e56980. doi: 10.7554/eLife.56980 (PMC7535931; doi:10.7554/eLife.56980)
Supplement: Figure 6—source data 4. [file elife-56980-fig6-data4.xlsx]

## Sheet: Sheet1
Spindle Orientation measured from each cell
E17.5 Epi basal			P0 Epi basal
Ctrl	cKO		Ctrl	cKO
36	33		72	56
19	25		22	0
56	0		77	49
0	67		17	55
11	59		0	0
64	0		0	25
61	35		35	45
47	32		20	62
75	18		48	0
0	0		0	73
69	17		0	85
74	25		18	0
83	0		59	76
23	0		0	0
85	85		11	0
0	35		31	6
0	88		81	0
84	84		0	0
0	55		0	35
85	28		0	58
54	81		62	22
78	0		34	69
38	81		84	0
59	5		0	19
64	7		6	0
0	53		26	0
90	38		15	39
73	26		14	0
41	90		44	55
0	0		0	13
55	83		0	74
62	88		7	75
0	84		26	0
0	90		65	37
28	0		0	6
0	71		48	8
32	28		35	89
45	52		88	25
0	27		72	12
56	0		0	35
17	25		19	0
31	36		0	25
43	55		25	0
90	35		35	19
24	14		67	71
0	58		63	26
37	22		0	53
0	82		0	82
44	63		0	27
14	0		0	16
90	46		0	24
14	17		9	0
54	86		0	0
0	46		27	0
44	52		27	22
43	23		28	0
56	14		0	0
59	0		17	56
19	0		18	36
11	39		14	24
18	0			12
63	0
47	54
6	47
87	68
0	0
0	24
17	59
84	56
12	0
83	77
87	14
0	0
17	0
0	90
90	88
0	12
	35
	0
	68
	57
	54
	85
	0
	0
	90
	38
