# Supplementary material for: m6A RNA methylation impacts fate choices during skin morphogenesis
Source: eLife. 2020 Aug 26;9:e56980. doi: 10.7554/eLife.56980 (PMC7535931; doi:10.7554/eLife.56980)
Supplement: Figure 7—figure supplement 1—source data 1. [file elife-56980-fig7-figsupp1-data1.xlsx]

## Sheet: Sheet1
Target		Ctrl	cKO
Bmyc	Replicate 1	0.8752	2.24327
	Replicate 2	1.22867	2.73378
	Replicate 3	0.929948	2.22202
