# Supplementary material for: m6A RNA methylation impacts fate choices during skin morphogenesis
Source: eLife. 2020 Aug 26;9:e56980. doi: 10.7554/eLife.56980 (PMC7535931; doi:10.7554/eLife.56980)
Supplement: Figure 7—figure supplement 1—source data 2. [file elife-56980-fig7-figsupp1-data2.xlsx]

## Sheet: Sheet1
Target		Ctrl	cKO
Myc	Replicate 1	1.31416	1.00107
	Replicate 2	1.05862	1.72943
	Replicate 3	0.718805	1.23684
