# Supplementary material for: m6A RNA methylation impacts fate choices during skin morphogenesis
Source: eLife. 2020 Aug 26;9:e56980. doi: 10.7554/eLife.56980 (PMC7535931; doi:10.7554/eLife.56980)
Supplement: Figure 7—figure supplement 1—source data 3. [file elife-56980-fig7-figsupp1-data3.xlsx]

## Sheet: Sheet1
		Relative MYC fluorescence signal
		E17.5		P0
		Ctrl	cKO	Ctrl	cKO
Replicate 1	Image 1	1.12037	1.69892	1.23971	1.18853
	Image 2	0.974078	1.84983	1.27803	0.889325
	Image 3	0.79821	1.79941	1.37277	0.883447
	Image 4	1.00306	1.61643	0.812408	0.856658
	Image 5	1.06325	1.86465	0.936906	1.13344
	Image 6	0.897041	1.69725	1.15861	0.897039
	Image 7	0.876271	1.73593	0.725833	2.84145
Replicate 2	Image 1	1.39742	1.44571	1.25963	2.40909
	Image 2	0.96716	1.37233	0.901117	2.52582
	Image 3	0.89716	1.71854	0.395168	1.92238
	Image 4	1.00598	1.57942	0.919828	1.7115
	Image 5	0.465426	1.18928	1.71776	0.863943
	Image 6	1.12258	1.47099	0.764894	2.27811
	Image 7	1.2547	1.57321	0.907488	0.884655
Replicate 3	Image 1	0.589718	1.21868	1.12646	0.506385
	Image 2	0.518226	1.65387	1.14595	1.45803
	Image 3	0.846988	1.18359	0.578994	1.43485
	Image 4	1.50838	1.35928	1.29541	2.41582
	Image 5	1.13636	1.60991	1.0652	0.361059
	Image 6	1.42154	0.917182	0.932124	0.85665
	Image 7	1.13608	1.43658	0.465731	0.619993
