# Supplementary material for: m6A RNA methylation impacts fate choices during skin morphogenesis
Source: eLife. 2020 Aug 26;9:e56980. doi: 10.7554/eLife.56980 (PMC7535931; doi:10.7554/eLife.56980)
Supplement: Figure 7—source data 1. [file elife-56980-fig7-data1.xlsx]

## Sheet: Sheet1
Target		Ctrl	cKO
Apex1	Replicate 1	0.989005	1.81399
	Replicate 2	1.22477	2.39571
	Replicate 3	0.82556	1.80051
Lsm10	Replicate 1	1.01838	2.56839
	Replicate 2	0.890993	3.62399
	Replicate 3	1.10209	2.62645
Exosc4	Replicate 1	1.13222	1.98206
	Replicate 2	0.874884	1.87382
	Replicate 3	1.00953	1.76597
Pop7	Replicate 1	1.09369	2.39702
	Replicate 2	1.04631	3.32415
	Replicate 3	0.873873	2.64787
Sac3d1	Replicate 1	0.970467	2.24992
	Replicate 2	1.20776	2.35376
	Replicate 3	0.853176	1.86426
Imp3	Replicate 1	1.00674	2.29252
	Replicate 2	1.34444	2.41975
	Replicate 3	0.738821	1.94914
Ccdc59	Replicate 1	1.18284	1.487
	Replicate 2	0.937741	1.86682
	Replicate 3	0.901555	1.56181
Clp1	Replicate 1	1.05398	2.06389
	Replicate 2	0.844239	2.25828
	Replicate 3	1.12384	2.21201
Gimap9	Replicate 1	1.09998	2.52737
	Replicate 2	1.0715	3.30494
	Replicate 3	0.848442	3.11207
Nxt1	Replicate 1	1.0621	2.61058
	Replicate 2	1.06633	2.9512
	Replicate 3	0.882959	2.61965
Ndufaf1	Replicate 1	1.04325	1.83088
	Replicate 2	0.877478	1.91212
	Replicate 3	1.09239	1.91011
Rhog	Replicate 1	1.16253	2.24364
	Replicate 2	0.800028	2.58806
	Replicate 3	1.07521	2.16966
