# Supplementary material for: m6A RNA methylation impacts fate choices during skin morphogenesis
Source: eLife. 2020 Aug 26;9:e56980. doi: 10.7554/eLife.56980 (PMC7535931; doi:10.7554/eLife.56980)
Supplement: Supplementary file 1. [file elife-56980-supp1.xlsx]

## Sheet: m6A site information
Chromosome #	m6A site start	m6A site end	Strand m6A site located	Region m6A located	Gene ID	Gene start	Gene end	Gene length	Transcript ID
chr7	45589419	45589419	+	3' UTR	0610005C13Rik	45567795	45575176	7382	NR_038165
chr7	45589483	45589483	+	3' UTR	0610005C13Rik	45567795	45575176	7382	NR_038165
chr7	45587936	45587936	+	Exon	0610005C13Rik	45567795	45575176	7382	NR_038165
chr7	45587460	45587460	+	Intron	0610005C13Rik	45567795	45575176	7382	NR_038165
chr7	45575956	45575956	+	Exon	0610005C13Rik	45567795	45575176	7382	NR_038165
chr7	45587720	45587720	+	Exon	0610005C13Rik	45567795	45575176	7382	NR_038165
chr12	85822132	85822132	-	Exon	0610007P14Rik	85815455	85824545	9091	NM_021446
chr12	85815720	85815720	-	3' UTR	0610007P14Rik	85815455	85824545	9091	NM_021446
chr12	85816412	85816412	-	Exon	0610007P14Rik	85815455	85824545	9091	NM_021446
chr11	51685651	51685651	-	Exon	0610009B22Rik	51685385	51688634	3250	NM_025319
chr11	51685891	51685891	-	Exon	0610009B22Rik	51685385	51688634	3250	NM_025319
chr11	51685636	51685636	-	3' UTR	0610009B22Rik	51685385	51688634	3250	NM_025319
chr11	51685722	51685722	-	Exon	0610009B22Rik	51685385	51688634	3250	NM_025319
chr11	51694834	51694834	-	3' UTR	0610009B22Rik	51685385	51688634	3250	NM_025319
chr11	51685876	51685876	-	Exon	0610009B22Rik	51685385	51688634	3250	NM_025319
chr11	51685883	51685883	-	Exon	0610009B22Rik	51685385	51688634	3250	NM_025319
chr11	51685897	51685897	-	Exon	0610009B22Rik	51685385	51688634	3250	NM_025319
chr11	51695006	51695006	-	3' UTR	0610009B22Rik	51685385	51688634	3250	NM_025319
chr11	51694852	51694852	-	3' UTR	0610009B22Rik	51685385	51688634	3250	NM_025319
chr11	51692864	51692864	-	3' UTR	0610009B22Rik	51685385	51688634	3250	NM_025319
chr11	51713613	51713613	-	Exon	0610009B22Rik	51685385	51688634	3250	NM_025319
chr11	23649448	23649448	-	Exon	0610010F05Rik	23573776	23633631	59856	NM_027860
chr11	23649388	23649388	-	Exon	0610010F05Rik	23573776	23633631	59856	NM_027860
chr11	23649451	23649451	-	Exon	0610010F05Rik	23573776	23633631	59856	NM_027860
chr11	23648996	23648996	-	3' UTR	0610010F05Rik	23573776	23633631	59856	NM_027860
chr11	23648984	23648984	-	3' UTR	0610010F05Rik	23573776	23633631	59856	NM_027860
chr11	23648988	23648988	-	3' UTR	0610010F05Rik	23573776	23633631	59856	NM_027860
chr11	23649532	23649532	-	Exon	0610010F05Rik	23573776	23633631	59856	NM_027860
chr11	23649116	23649116	-	3' UTR	0610010F05Rik	23573776	23633631	59856	NM_027860
chr11	23649480	23649480	-	Exon	0610010F05Rik	23573776	23633631	59856	NM_027860
chr11	23649308	23649308	-	Exon	0610010F05Rik	23573776	23633631	59856	NM_027860
chr11	23649012	23649012	-	3' UTR	0610010F05Rik	23573776	23633631	59856	NM_027860
chr11	23649099	23649099	-	3' UTR	0610010F05Rik	23573776	23633631	59856	NM_027860
chr11	23649090	23649090	-	3' UTR	0610010F05Rik	23573776	23633631	59856	NM_027860
chr11	23649265	23649265	-	3' UTR	0610010F05Rik	23573776	23633631	59856	NM_027860
chr11	70238283	70238283	-	3' UTR	0610010K14Rik	70235204	70237914	2711	NM_001177601
chr11	70238342	70238342	-	Exon	0610010K14Rik	70235204	70237914	2711	NM_001177601
chr11	70237958	70237958	-	Downstream (2-3kb)	0610010K14Rik	70235204	70237914	2711	NM_001177601
chr11	70238153	70238153	-	3' UTR	0610010K14Rik	70235204	70237914	2711	NM_001177601
chr11	70238203	70238203	-	3' UTR	0610010K14Rik	70235204	70237914	2711	NM_001177601
chr11	70238357	70238357	-	Exon	0610010K14Rik	70235204	70237914	2711	NM_001177601
chr17	25877896	25877896	-	Exon	0610011F06Rik	25875500	25877163	1664	NM_026686
chr17	25878036	25878036	-	Exon	0610011F06Rik	25875500	25877163	1664	NM_026686
chr17	25877854	25877854	-	Exon	0610011F06Rik	25875500	25877163	1664	NM_026686
chr17	25877793	25877793	-	Exon	0610011F06Rik	25875500	25877163	1664	NM_026686
chr17	25878136	25878136	-	Exon	0610011F06Rik	25875500	25877163	1664	NM_026686
chr17	25877694	25877694	-	Exon	0610011F06Rik	25875500	25877163	1664	NM_026686
chr16	31948013	31948013	-	Exon	0610012G03Rik	31947051	31948521	1471	NR_027897
chr16	31947529	31947529	-	Exon	0610012G03Rik	31947051	31948521	1471	NR_027897
chr16	31948049	31948049	-	Exon	0610012G03Rik	31947051	31948521	1471	NR_027897
chr16	31947922	31947922	-	Exon	0610012G03Rik	31947051	31948521	1471	NR_027897
chr16	31948237	31948237	-	Exon	0610012G03Rik	31947051	31948521	1471	NR_027897
chr16	31947982	31947982	-	Exon	0610012G03Rik	31947051	31948521	1471	NR_027897
chr16	31947939	31947939	-	Exon	0610012G03Rik	31947051	31948521	1471	NR_027897
chr16	31947990	31947990	-	Exon	0610012G03Rik	31947051	31948521	1471	NR_027897
chr6	72351222	72351222	+	3' UTR	0610030E20Rik	72347317	72353160	5844	NM_026696
chr6	72350213	72350213	+	3' UTR	0610030E20Rik	72347317	72353160	5844	NM_026696
chr6	72350806	72350806	+	3' UTR	0610030E20Rik	72347317	72353160	5844	NM_026696
chr6	72349748	72349748	+	3' UTR	0610030E20Rik	72347317	72353160	5844	NM_026696
chr6	72351155	72351155	+	3' UTR	0610030E20Rik	72347317	72353160	5844	NM_026696
chr6	72349251	72349251	+	3' UTR	0610030E20Rik	72347317	72353160	5844	NM_026696
chr6	72347396	72347396	+	5' UTR	0610030E20Rik	72347317	72353160	5844	NM_026696
chr6	72348634	72348634	+	Exon	0610030E20Rik	72347317	72353160	5844	NM_026696
chr6	72351362	72351362	+	3' UTR	0610030E20Rik	72347317	72353160	5844	NM_026696
chr6	72348646	72348646	+	Exon	0610030E20Rik	72347317	72353160	5844	NM_026696
chr6	72350394	72350394	+	3' UTR	0610030E20Rik	72347317	72353160	5844	NM_026696
chr3	88329642	88329642	-	3' UTR	0610031J06Rik	88325023	88328631	3609	NM_020003
chr3	88329676	88329676	-	3' UTR	0610031J06Rik	88325023	88328631	3609	NM_020003
chr3	88311736	88311736	+	Exon	0610031J06Rik	88325023	88328631	3609	NM_020003
chr3	88321617	88321617	+	3' UTR	0610031J06Rik	88325023	88328631	3609	NM_020003
chr3	88329535	88329535	-	3' UTR	0610031J06Rik	88325023	88328631	3609	NM_020003
chr3	88321062	88321062	+	Exon	0610031J06Rik	88325023	88328631	3609	NM_020003
chr3	88318461	88318461	+	Exon	0610031J06Rik	88325023	88328631	3609	NM_020003
chr3	88321574	88321574	+	3' UTR	0610031J06Rik	88325023	88328631	3609	NM_020003
chr3	88329626	88329626	-	3' UTR	0610031J06Rik	88325023	88328631	3609	NM_020003
chr3	88321125	88321125	+	Exon	0610031J06Rik	88325023	88328631	3609	NM_020003
chr3	88321626	88321626	+	3' UTR	0610031J06Rik	88325023	88328631	3609	NM_020003
chr3	88329278	88329278	-	3' UTR	0610031J06Rik	88325023	88328631	3609	NM_020003
chr3	88329378	88329378	-	3' UTR	0610031J06Rik	88325023	88328631	3609	NM_020003
chr3	88328582	88328582	+	3' UTR	0610031J06Rik	88325023	88328631	3609	NM_020003
chr3	88329413	88329413	-	3' UTR	0610031J06Rik	88325023	88328631	3609	NM_020003
chr3	88321696	88321696	+	3' UTR	0610031J06Rik	88325023	88328631	3609	NM_020003
chr3	88321700	88321700	+	3' UTR	0610031J06Rik	88325023	88328631	3609	NM_020003
chr3	88328613	88328613	+	3' UTR	0610031J06Rik	88325023	88328631	3609	NM_020003
chr3	88329610	88329610	-	3' UTR	0610031J06Rik	88325023	88328631	3609	NM_020003
chr3	88329258	88329258	-	3' UTR	0610031J06Rik	88325023	88328631	3609	NM_020003
chr3	88328403	88328403	+	3' UTR	0610031J06Rik	88325023	88328631	3609	NM_020003
chr3	88329205	88329205	-	3' UTR	0610031J06Rik	88325023	88328631	3609	NM_020003
chr4	107904237	107904237	-	Exon	0610037L13Rik	107889899	107897802	7904	NM_028754
chr4	107904353	107904353	-	Exon	0610037L13Rik	107889899	107897802	7904	NM_028754
chr4	107897543	107897543	+	3' UTR	0610037L13Rik	107889899	107897802	7904	NM_028754
chr4	107896877	107896877	+	Exon	0610037L13Rik	107889899	107897802	7904	NM_028754
chr4	107890143	107890143	+	Exon	0610037L13Rik	107889899	107897802	7904	NM_028754
chr4	107896949	107896949	+	3' UTR	0610037L13Rik	107889899	107897802	7904	NM_028754
chr4	107897421	107897421	+	3' UTR	0610037L13Rik	107889899	107897802	7904	NM_028754
chr4	107897503	107897503	+	3' UTR	0610037L13Rik	107889899	107897802	7904	NM_028754
chr4	107897169	107897169	+	3' UTR	0610037L13Rik	107889899	107897802	7904	NM_028754
chr4	107887252	107887252	+	Exon	0610037L13Rik	107889899	107897802	7904	NM_028754
chr4	107887293	107887293	+	3' UTR	0610037L13Rik	107889899	107897802	7904	NM_028754
chr4	107887295	107887295	+	3' UTR	0610037L13Rik	107889899	107897802	7904	NM_028754
chr8	77259141	77259141	-	Exon	0610038B21Rik	77517056	77518578	1523	NR_028125
chr8	77450881	77450881	-	Exon	0610038B21Rik	77517056	77518578	1523	NR_028125
chr8	77250710	77250710	-	3' UTR	0610038B21Rik	77517056	77518578	1523	NR_028125
chr8	77388719	77388719	-	Exon	0610038B21Rik	77517056	77518578	1523	NR_028125
chr2	163626352	163626352	-	Exon	0610039K10Rik	163644850	163645800	951	NR_028113
chr2	163625485	163625485	-	Exon	0610039K10Rik	163644850	163645800	951	NR_028113
chr2	163628003	163628003	-	Exon	0610039K10Rik	163644850	163645800	951	NR_028113
chr2	163625361	163625361	-	3' UTR	0610039K10Rik	163644850	163645800	951	NR_028113
chr2	163634461	163634461	-	Exon	0610039K10Rik	163644850	163645800	951	NR_028113
chr2	163626404	163626404	-	Exon	0610039K10Rik	163644850	163645800	951	NR_028113
chr2	163627907	163627907	-	Exon	0610039K10Rik	163644850	163645800	951	NR_028113
chr2	163630999	163630999	-	Exon	0610039K10Rik	163644850	163645800	951	NR_028113
chr2	163625344	163625344	-	3' UTR	0610039K10Rik	163644850	163645800	951	NR_028113
chr5	143332576	143332576	+	Exon	0610040B10Rik	143329308	143332704	3397	NR_027874
chr6	108665591	108665591	+	3' UTR	0610040F04Rik	108577036	108660934	83899	NR_104577
chr6	108665202	108665202	+	Exon	0610040F04Rik	108577036	108660934	83899	NR_104577
chr6	108664854	108664854	+	Exon	0610040F04Rik	108577036	108660934	83899	NR_104577
chr6	108661212	108661212	+	Exon	0610040F04Rik	108577036	108660934	83899	NR_104577
chr6	108665321	108665321	+	Exon	0610040F04Rik	108577036	108660934	83899	NR_104577
chr6	108665209	108665209	+	Exon	0610040F04Rik	108577036	108660934	83899	NR_104577
chr6	108665313	108665313	+	Exon	0610040F04Rik	108577036	108660934	83899	NR_104577
chr6	108664581	108664581	+	Exon	0610040F04Rik	108577036	108660934	83899	NR_104577
chr6	108664538	108664538	+	Exon	0610040F04Rik	108577036	108660934	83899	NR_104577
chr6	108665701	108665701	+	3' UTR	0610040F04Rik	108577036	108660934	83899	NR_104577
chr6	108665733	108665733	+	3' UTR	0610040F04Rik	108577036	108660934	83899	NR_104577
chr6	108664894	108664894	+	Exon	0610040F04Rik	108577036	108660934	83899	NR_104577
chr6	108665328	108665328	+	Exon	0610040F04Rik	108577036	108660934	83899	NR_104577
chr6	108664821	108664821	+	Exon	0610040F04Rik	108577036	108660934	83899	NR_104577
chr6	108660811	108660811	+	5' UTR	0610040F04Rik	108577036	108660934	83899	NR_104577
chr6	108666150	108666150	+	3' UTR	0610040F04Rik	108577036	108660934	83899	NR_104577
chr6	108660825	108660825	+	5' UTR	0610040F04Rik	108577036	108660934	83899	NR_104577
chr6	108665236	108665236	+	Exon	0610040F04Rik	108577036	108660934	83899	NR_104577
chr6	108662474	108662474	+	Intron	0610040F04Rik	108577036	108660934	83899	NR_104577
chr6	108665583	108665583	+	3' UTR	0610040F04Rik	108577036	108660934	83899	NR_104577
chr6	108665196	108665196	+	Exon	0610040F04Rik	108577036	108660934	83899	NR_104577
chr6	108664749	108664749	+	Exon	0610040F04Rik	108577036	108660934	83899	NR_104577
chr6	108665333	108665333	+	3' UTR	0610040F04Rik	108577036	108660934	83899	NR_104577
chr6	108665100	108665100	+	Exon	0610040F04Rik	108577036	108660934	83899	NR_104577
chr6	108664695	108664695	+	Exon	0610040F04Rik	108577036	108660934	83899	NR_104577
chr6	108664809	108664809	+	Exon	0610040F04Rik	108577036	108660934	83899	NR_104577
chr6	108664590	108664590	+	Exon	0610040F04Rik	108577036	108660934	83899	NR_104577
chr6	108664815	108664815	+	Exon	0610040F04Rik	108577036	108660934	83899	NR_104577
chr6	108664674	108664674	+	Exon	0610040F04Rik	108577036	108660934	83899	NR_104577
chr12	3405829	3405829	-	3' UTR	1110002L01Rik	3403883	3426747	22865	NR_030694
chr12	3403459	3403459	+	3' UTR	1110002L01Rik	3403883	3426747	22865	NR_030694
chr16	90938736	90938736	-	3' UTR	1110004E09Rik	90925811	90934849	9039	NM_026502
chr16	90937707	90937707	-	3' UTR	1110004E09Rik	90925811	90934849	9039	NM_026502
chr16	90960356	90960356	-	Exon	1110004E09Rik	90925811	90934849	9039	NM_026502
chr16	90926014	90926014	-	Exon	1110004E09Rik	90925811	90934849	9039	NM_026502
chr16	90960317	90960317	-	Exon	1110004E09Rik	90925811	90934849	9039	NM_026502
chr16	90938442	90938442	-	3' UTR	1110004E09Rik	90925811	90934849	9039	NM_026502
chr16	90938559	90938559	-	3' UTR	1110004E09Rik	90925811	90934849	9039	NM_026502
chr16	90963873	90963873	-	Exon	1110004E09Rik	90925811	90934849	9039	NM_026502
chr16	90938256	90938256	-	3' UTR	1110004E09Rik	90925811	90934849	9039	NM_026502
chr16	90938719	90938719	-	3' UTR	1110004E09Rik	90925811	90934849	9039	NM_026502
chr16	90925994	90925994	-	Exon	1110004E09Rik	90925811	90934849	9039	NM_026502
chr16	90938598	90938598	-	3' UTR	1110004E09Rik	90925811	90934849	9039	NM_026502
chr16	90938724	90938724	-	3' UTR	1110004E09Rik	90925811	90934849	9039	NM_026502
chr7	116123814	116123814	-	Distal Intergenic	1110004F10Rik	116093380	116105210	11831	NM_019772
chr7	116124259	116124259	-	3' UTR	1110004F10Rik	116093380	116105210	11831	NM_019772
chr7	116124622	116124622	-	3' UTR	1110004F10Rik	116093380	116105210	11831	NM_019772
chr7	116124197	116124197	-	3' UTR	1110004F10Rik	116093380	116105210	11831	NM_019772
chr7	116124502	116124502	-	3' UTR	1110004F10Rik	116093380	116105210	11831	NM_019772
chr7	116124293	116124293	-	3' UTR	1110004F10Rik	116093380	116105210	11831	NM_019772
chr7	116123740	116123740	-	Distal Intergenic	1110004F10Rik	116093380	116105210	11831	NM_019772
chr7	116123787	116123787	-	Distal Intergenic	1110004F10Rik	116093380	116105210	11831	NM_019772
chr7	116124443	116124443	-	3' UTR	1110004F10Rik	116093380	116105210	11831	NM_019772
chr7	116134797	116134797	-	Intron	1110004F10Rik	116093380	116105210	11831	NM_019772
chr7	116123833	116123833	-	Distal Intergenic	1110004F10Rik	116093380	116105210	11831	NM_019772
chr7	116124063	116124063	-	Distal Intergenic	1110004F10Rik	116093380	116105210	11831	NM_019772
chr7	116140363	116140363	-	Exon	1110004F10Rik	116093380	116105210	11831	NM_019772
chr7	116124038	116124038	-	Distal Intergenic	1110004F10Rik	116093380	116105210	11831	NM_019772
chr7	116123693	116123693	-	Distal Intergenic	1110004F10Rik	116093380	116105210	11831	NM_019772
chr7	116104519	116104519	+	3' UTR	1110004F10Rik	116093380	116105210	11831	NM_019772
chr7	116124250	116124250	-	3' UTR	1110004F10Rik	116093380	116105210	11831	NM_019772
chr7	116123946	116123946	-	Distal Intergenic	1110004F10Rik	116093380	116105210	11831	NM_019772
chr7	116132712	116132712	-	Exon	1110004F10Rik	116093380	116105210	11831	NM_019772
chr7	116134983	116134983	-	Intron	1110004F10Rik	116093380	116105210	11831	NM_019772
chr7	116124641	116124641	-	3' UTR	1110004F10Rik	116093380	116105210	11831	NM_019772
chr7	116124573	116124573	-	3' UTR	1110004F10Rik	116093380	116105210	11831	NM_019772
chr7	116104501	116104501	+	3' UTR	1110004F10Rik	116093380	116105210	11831	NM_019772
chr7	116099490	116099490	+	Exon	1110004F10Rik	116093380	116105210	11831	NM_019772
chr7	116133899	116133899	-	Intron	1110004F10Rik	116093380	116105210	11831	NM_019772
chr7	116123959	116123959	-	Distal Intergenic	1110004F10Rik	116093380	116105210	11831	NM_019772
chr7	116123990	116123990	-	Distal Intergenic	1110004F10Rik	116093380	116105210	11831	NM_019772
chr7	116123899	116123899	-	Distal Intergenic	1110004F10Rik	116093380	116105210	11831	NM_019772
chr7	116123858	116123858	-	Distal Intergenic	1110004F10Rik	116093380	116105210	11831	NM_019772
chr5	115621997	115621997	+	Intron	1110006O24Rik	115631049	115631816	768	NR_027810
chr5	115614491	115614491	+	Exon	1110006O24Rik	115631049	115631816	768	NR_027810
chr13	49202998	49202998	-	3' UTR	1110007C09Rik	49202951	49216026	13076	NM_026738
chr2	156873122	156873122	+	3' UTR	1110008F13Rik	156863122	156873562	10441	NM_026124
chr2	156873130	156873130	+	3' UTR	1110008F13Rik	156863122	156873562	10441	NM_026124
chr2	156873305	156873305	+	3' UTR	1110008F13Rik	156863122	156873562	10441	NM_026124
chr2	156863247	156863247	+	5' UTR	1110008F13Rik	156863122	156873562	10441	NM_026124
chr2	156873220	156873220	+	3' UTR	1110008F13Rik	156863122	156873562	10441	NM_026124
chr2	156873536	156873536	+	3' UTR	1110008F13Rik	156863122	156873562	10441	NM_026124
chr2	156873261	156873261	+	3' UTR	1110008F13Rik	156863122	156873562	10441	NM_026124
chr2	156873211	156873211	+	3' UTR	1110008F13Rik	156863122	156873562	10441	NM_026124
chr2	156873249	156873249	+	3' UTR	1110008F13Rik	156863122	156873562	10441	NM_026124
chr2	156863846	156863846	+	Intron	1110008F13Rik	156863122	156873562	10441	NM_026124
chr2	156873392	156873392	+	3' UTR	1110008F13Rik	156863122	156873562	10441	NM_026124
chr2	156873080	156873080	+	3' UTR	1110008F13Rik	156863122	156873562	10441	NM_026124
chr2	156873434	156873434	+	3' UTR	1110008F13Rik	156863122	156873562	10441	NM_026124
chr2	156863936	156863936	+	Intron	1110008F13Rik	156863122	156873562	10441	NM_026124
chr2	156873200	156873200	+	3' UTR	1110008F13Rik	156863122	156873562	10441	NM_026124
chr12	55281642	55281642	-	Exon	1110008L16Rik	55302637	55382491	79855	NM_025373
chr2	32378128	32378128	+	Exon	1110008P14Rik	32379101	32381915	2815	NM_198001
chr2	32375529	32375529	+	Exon	1110008P14Rik	32379101	32381915	2815	NM_198001
chrX	70389288	70389288	+	3' UTR	1110012L19Rik	70385913	70389416	3504	NM_026787
chrX	70389305	70389305	+	3' UTR	1110012L19Rik	70385913	70389416	3504	NM_026787
chrX	70388892	70388892	+	Exon	1110012L19Rik	70385913	70389416	3504	NM_026787
chrX	70388053	70388053	+	Exon	1110012L19Rik	70385913	70389416	3504	NM_026787
chr8	106552873	106552873	+	Exon	1110028F18Rik	106587143	106594820	7678	NR_045470
chr8	106552867	106552867	+	Exon	1110028F18Rik	106587143	106594820	7678	NR_045470
chr8	106555877	106555877	+	3' UTR	1110028F18Rik	106587143	106594820	7678	NR_045470
chr8	106555302	106555302	+	Exon	1110028F18Rik	106587143	106594820	7678	NR_045470
chr8	106555570	106555570	+	3' UTR	1110028F18Rik	106587143	106594820	7678	NR_045470
chr8	106551254	106551254	+	Intron	1110028F18Rik	106587143	106594820	7678	NR_045470
chr8	106555422	106555422	+	Exon	1110028F18Rik	106587143	106594820	7678	NR_045470
chr8	106555483	106555483	+	3' UTR	1110028F18Rik	106587143	106594820	7678	NR_045470
chr8	106555962	106555962	+	3' UTR	1110028F18Rik	106587143	106594820	7678	NR_045470
chr8	106555582	106555582	+	3' UTR	1110028F18Rik	106587143	106594820	7678	NR_045470
chr8	106556797	106556797	+	3' UTR	1110028F18Rik	106587143	106594820	7678	NR_045470
chr8	106552810	106552810	+	Intron	1110028F18Rik	106587143	106594820	7678	NR_045470
chr8	106555810	106555810	+	3' UTR	1110028F18Rik	106587143	106594820	7678	NR_045470
chr8	106555389	106555389	+	Exon	1110028F18Rik	106587143	106594820	7678	NR_045470
chr8	106555945	106555945	+	3' UTR	1110028F18Rik	106587143	106594820	7678	NR_045470
chr8	106555934	106555934	+	3' UTR	1110028F18Rik	106587143	106594820	7678	NR_045470
chr8	106555281	106555281	+	Exon	1110028F18Rik	106587143	106594820	7678	NR_045470
chr8	106555536	106555536	+	3' UTR	1110028F18Rik	106587143	106594820	7678	NR_045470
chr8	106555595	106555595	+	3' UTR	1110028F18Rik	106587143	106594820	7678	NR_045470
chr8	106555377	106555377	+	Exon	1110028F18Rik	106587143	106594820	7678	NR_045470
chr8	106551287	106551287	+	Intron	1110028F18Rik	106587143	106594820	7678	NR_045470
chr8	106555487	106555487	+	3' UTR	1110028F18Rik	106587143	106594820	7678	NR_045470
chr8	106555741	106555741	+	3' UTR	1110028F18Rik	106587143	106594820	7678	NR_045470
chr8	106555763	106555763	+	3' UTR	1110028F18Rik	106587143	106594820	7678	NR_045470
chr8	106556154	106556154	+	3' UTR	1110028F18Rik	106587143	106594820	7678	NR_045470
chr8	106555374	106555374	+	Exon	1110028F18Rik	106587143	106594820	7678	NR_045470
chr8	106556086	106556086	+	3' UTR	1110028F18Rik	106587143	106594820	7678	NR_045470
chr8	106555480	106555480	+	3' UTR	1110028F18Rik	106587143	106594820	7678	NR_045470
chr8	106555636	106555636	+	3' UTR	1110028F18Rik	106587143	106594820	7678	NR_045470
chr8	106555414	106555414	+	Exon	1110028F18Rik	106587143	106594820	7678	NR_045470
chr8	106555305	106555305	+	Exon	1110028F18Rik	106587143	106594820	7678	NR_045470
chr8	106555638	106555638	+	3' UTR	1110028F18Rik	106587143	106594820	7678	NR_045470
chr8	106555446	106555446	+	Exon	1110028F18Rik	106587143	106594820	7678	NR_045470
chr8	106555633	106555633	+	3' UTR	1110028F18Rik	106587143	106594820	7678	NR_045470
chr8	106552927	106552927	+	Exon	1110028F18Rik	106587143	106594820	7678	NR_045470
chr8	106555624	106555624	+	3' UTR	1110028F18Rik	106587143	106594820	7678	NR_045470
chr9	50767734	50767734	-	Intron	1110032A03Rik	50762828	50768152	5325	NM_023483
chr3	68893333	68893333	-	3' UTR	1110032F04Rik	68869586	68872163	2578	NM_001167996
chr4	11514088	11514088	+	Exon	1110037F02Rik	11485958	11551143	65186	NM_001081183
chr4	11513670	11513670	+	Exon	1110037F02Rik	11485958	11551143	65186	NM_001081183
chr4	11518984	11518984	+	Exon	1110037F02Rik	11485958	11551143	65186	NM_001081183
chr4	11519260	11519260	+	Exon	1110037F02Rik	11485958	11551143	65186	NM_001081183
chr4	11519189	11519189	+	Exon	1110037F02Rik	11485958	11551143	65186	NM_001081183
chr4	11519090	11519090	+	Exon	1110037F02Rik	11485958	11551143	65186	NM_001081183
chr4	11513470	11513470	+	Exon	1110037F02Rik	11485958	11551143	65186	NM_001081183
chr4	11513746	11513746	+	Exon	1110037F02Rik	11485958	11551143	65186	NM_001081183
chr4	11519040	11519040	+	Exon	1110037F02Rik	11485958	11551143	65186	NM_001081183
chr4	11513537	11513537	+	Exon	1110037F02Rik	11485958	11551143	65186	NM_001081183
chr4	11513789	11513789	+	Exon	1110037F02Rik	11485958	11551143	65186	NM_001081183
chr4	11513876	11513876	+	Exon	1110037F02Rik	11485958	11551143	65186	NM_001081183
chr4	11513851	11513851	+	Exon	1110037F02Rik	11485958	11551143	65186	NM_001081183
chr4	11513774	11513774	+	Exon	1110037F02Rik	11485958	11551143	65186	NM_001081183
chr4	11513308	11513308	+	Exon	1110037F02Rik	11485958	11551143	65186	NM_001081183
chr4	11513976	11513976	+	Exon	1110037F02Rik	11485958	11551143	65186	NM_001081183
chr4	11519200	11519200	+	Exon	1110037F02Rik	11485958	11551143	65186	NM_001081183
chr4	11513915	11513915	+	Exon	1110037F02Rik	11485958	11551143	65186	NM_001081183
chr4	11519300	11519300	+	Exon	1110037F02Rik	11485958	11551143	65186	NM_001081183
chr4	11513172	11513172	+	Exon	1110037F02Rik	11485958	11551143	65186	NM_001081183
chr4	11513895	11513895	+	Exon	1110037F02Rik	11485958	11551143	65186	NM_001081183
chr4	11513156	11513156	+	Exon	1110037F02Rik	11485958	11551143	65186	NM_001081183
chr4	11514065	11514065	+	Exon	1110037F02Rik	11485958	11551143	65186	NM_001081183
chr4	11486053	11486053	+	Exon	1110037F02Rik	11485958	11551143	65186	NM_001081183
chr17	34952141	34952141	-	Exon	1110038B12Rik	34950236	34952468	2233	NR_027943
chr17	34952242	34952242	-	Intron	1110038B12Rik	34950236	34952468	2233	NR_027943
chr17	34952295	34952295	-	Intron	1110038B12Rik	34950236	34952468	2233	NR_027943
chr17	34952266	34952266	-	Intron	1110038B12Rik	34950236	34952468	2233	NR_027943
chr17	34952285	34952285	-	Intron	1110038B12Rik	34950236	34952468	2233	NR_027943
chr15	76950622	76950622	+	3' UTR	1110038F14Rik	76948544	76950731	2188	NM_054099
chr1	24029161	24029161	-	Exon	1110058L19Rik	23995939	24005640	9702	NM_026503
chr1	24029076	24029076	-	Exon	1110058L19Rik	23995939	24005640	9702	NM_026503
chr1	24028452	24028452	-	Exon	1110058L19Rik	23995939	24005640	9702	NM_026503
chr1	24029031	24029031	-	Exon	1110058L19Rik	23995939	24005640	9702	NM_026503
chr1	24029084	24029084	-	Exon	1110058L19Rik	23995939	24005640	9702	NM_026503
chr1	24028384	24028384	-	Exon	1110058L19Rik	23995939	24005640	9702	NM_026503
chr1	24028801	24028801	-	Exon	1110058L19Rik	23995939	24005640	9702	NM_026503
chr1	24028415	24028415	-	Exon	1110058L19Rik	23995939	24005640	9702	NM_026503
chr1	24015862	24015862	-	Intron	1110058L19Rik	23995939	24005640	9702	NM_026503
chr1	24028427	24028427	-	Exon	1110058L19Rik	23995939	24005640	9702	NM_026503
chr1	24029819	24029819	-	Exon	1110058L19Rik	23995939	24005640	9702	NM_026503
chr1	24032585	24032585	-	Intron	1110058L19Rik	23995939	24005640	9702	NM_026503
chr1	24028366	24028366	-	Exon	1110058L19Rik	23995939	24005640	9702	NM_026503
chr1	24047091	24047091	-	Intron	1110058L19Rik	23995939	24005640	9702	NM_026503
chr1	24021028	24021028	-	Intron	1110058L19Rik	23995939	24005640	9702	NM_026503
chr1	24030434	24030434	-	Exon	1110058L19Rik	23995939	24005640	9702	NM_026503
chr1	24028257	24028257	-	Exon	1110058L19Rik	23995939	24005640	9702	NM_026503
chr1	24028697	24028697	-	Exon	1110058L19Rik	23995939	24005640	9702	NM_026503
chr1	24029416	24029416	-	Exon	1110058L19Rik	23995939	24005640	9702	NM_026503
chr1	24028874	24028874	-	Exon	1110058L19Rik	23995939	24005640	9702	NM_026503
chr1	24028630	24028630	-	Exon	1110058L19Rik	23995939	24005640	9702	NM_026503
chr1	24028480	24028480	-	Exon	1110058L19Rik	23995939	24005640	9702	NM_026503
chr1	24029688	24029688	-	Exon	1110058L19Rik	23995939	24005640	9702	NM_026503
chr1	24029599	24029599	-	Exon	1110058L19Rik	23995939	24005640	9702	NM_026503
chr1	24028711	24028711	-	Exon	1110058L19Rik	23995939	24005640	9702	NM_026503
chr1	24029756	24029756	-	Exon	1110058L19Rik	23995939	24005640	9702	NM_026503
chr1	24029179	24029179	-	Exon	1110058L19Rik	23995939	24005640	9702	NM_026503
chr1	24029243	24029243	-	Exon	1110058L19Rik	23995939	24005640	9702	NM_026503
chr1	24021880	24021880	-	Exon	1110058L19Rik	23995939	24005640	9702	NM_026503
chr1	24044240	24044240	-	Exon	1110058L19Rik	23995939	24005640	9702	NM_026503
chr1	24030254	24030254	-	Exon	1110058L19Rik	23995939	24005640	9702	NM_026503
chr1	24029899	24029899	-	Exon	1110058L19Rik	23995939	24005640	9702	NM_026503
chr1	24030273	24030273	-	Exon	1110058L19Rik	23995939	24005640	9702	NM_026503
chr1	24026279	24026279	-	Intron	1110058L19Rik	23995939	24005640	9702	NM_026503
chr1	24029517	24029517	-	Exon	1110058L19Rik	23995939	24005640	9702	NM_026503
chr1	24029657	24029657	-	Exon	1110058L19Rik	23995939	24005640	9702	NM_026503
chr1	24012272	24012272	-	3' UTR	1110058L19Rik	23995939	24005640	9702	NM_026503
chr1	24029729	24029729	-	Exon	1110058L19Rik	23995939	24005640	9702	NM_026503
chr1	23996214	23996214	-	3' UTR	1110058L19Rik	23995939	24005640	9702	NM_026503
chr19	21598242	21598242	-	Exon	1110059E24Rik	21597313	21652791	55479	NM_025423
chr19	21598274	21598274	-	Exon	1110059E24Rik	21597313	21652791	55479	NM_025423
chr19	21597382	21597382	-	3' UTR	1110059E24Rik	21597313	21652791	55479	NM_025423
chr9	122947829	122947829	-	3' UTR	1110059G10Rik	122945089	122951000	5912	NM_025419
chr9	122947954	122947954	-	Exon	1110059G10Rik	122945089	122951000	5912	NM_025419
chr9	122947916	122947916	-	Exon	1110059G10Rik	122945089	122951000	5912	NM_025419
chr9	122947958	122947958	-	Exon	1110059G10Rik	122945089	122951000	5912	NM_025419
chr9	122947822	122947822	-	3' UTR	1110059G10Rik	122945089	122951000	5912	NM_025419
chr9	122947800	122947800	-	3' UTR	1110059G10Rik	122945089	122951000	5912	NM_025419
chr4	124849682	124849682	-	3' UTR	1110065P20Rik	124849485	124850730	1246	NM_001142727
chr4	124844804	124844804	+	3' UTR	1110065P20Rik	124849485	124850730	1246	NM_001142727
chr4	124848805	124848805	-	3' UTR	1110065P20Rik	124849485	124850730	1246	NM_001142727
chr4	124838807	124838807	+	Exon	1110065P20Rik	124849485	124850730	1246	NM_001142727
chr4	124838716	124838716	+	Exon	1110065P20Rik	124849485	124850730	1246	NM_001142727
chr4	124838753	124838753	+	Exon	1110065P20Rik	124849485	124850730	1246	NM_001142727
chr4	124838801	124838801	+	Exon	1110065P20Rik	124849485	124850730	1246	NM_001142727
chr4	124844595	124844595	+	3' UTR	1110065P20Rik	124849485	124850730	1246	NM_001142727
chr4	124844719	124844719	+	3' UTR	1110065P20Rik	124849485	124850730	1246	NM_001142727
chr4	124844735	124844735	+	3' UTR	1110065P20Rik	124849485	124850730	1246	NM_001142727
chr6	134925148	134925148	+	3' UTR	1190002F15Rik	134929092	134951718	22627	NR_037955
chr6	134924853	134924853	+	3' UTR	1190002F15Rik	134929092	134951718	22627	NR_037955
chr6	134927559	134927559	+	Distal Intergenic	1190002F15Rik	134929092	134951718	22627	NR_037955
chr6	134925476	134925476	+	3' UTR	1190002F15Rik	134929092	134951718	22627	NR_037955
chr9	94537625	94537625	-	Exon	1190002N15Rik	94517864	94538081	20218	NM_001033145
chr9	94524526	94524526	-	Exon	1190002N15Rik	94517864	94538081	20218	NM_001033145
chr9	94520628	94520628	-	Exon	1190002N15Rik	94517864	94538081	20218	NM_001033145
chr9	94520187	94520187	-	3' UTR	1190002N15Rik	94517864	94538081	20218	NM_001033145
chr9	94518319	94518319	-	3' UTR	1190002N15Rik	94517864	94538081	20218	NM_001033145
chr9	94524609	94524609	-	Exon	1190002N15Rik	94517864	94538081	20218	NM_001033145
chr9	94524478	94524478	-	Exon	1190002N15Rik	94517864	94538081	20218	NM_001033145
chr9	94519244	94519244	-	3' UTR	1190002N15Rik	94517864	94538081	20218	NM_001033145
chr9	94518103	94518103	-	3' UTR	1190002N15Rik	94517864	94538081	20218	NM_001033145
chr9	94520091	94520091	-	3' UTR	1190002N15Rik	94517864	94538081	20218	NM_001033145
chr9	94520328	94520328	-	Exon	1190002N15Rik	94517864	94538081	20218	NM_001033145
chr9	94520181	94520181	-	3' UTR	1190002N15Rik	94517864	94538081	20218	NM_001033145
chr9	94519682	94519682	-	3' UTR	1190002N15Rik	94517864	94538081	20218	NM_001033145
chr9	94520165	94520165	-	3' UTR	1190002N15Rik	94517864	94538081	20218	NM_001033145
chr9	94524520	94524520	-	Exon	1190002N15Rik	94517864	94538081	20218	NM_001033145
chr9	94520237	94520237	-	3' UTR	1190002N15Rik	94517864	94538081	20218	NM_001033145
chr9	94520529	94520529	-	Exon	1190002N15Rik	94517864	94538081	20218	NM_001033145
chr9	94520273	94520273	-	3' UTR	1190002N15Rik	94517864	94538081	20218	NM_001033145
chr9	94520251	94520251	-	3' UTR	1190002N15Rik	94517864	94538081	20218	NM_001033145
chr9	94537280	94537280	-	Exon	1190002N15Rik	94517864	94538081	20218	NM_001033145
chr9	94520387	94520387	-	Exon	1190002N15Rik	94517864	94538081	20218	NM_001033145
chr9	94520468	94520468	-	Exon	1190002N15Rik	94517864	94538081	20218	NM_001033145
chr9	94524588	94524588	-	Exon	1190002N15Rik	94517864	94538081	20218	NM_001033145
chr9	94520203	94520203	-	3' UTR	1190002N15Rik	94517864	94538081	20218	NM_001033145
chr9	94520538	94520538	-	Exon	1190002N15Rik	94517864	94538081	20218	NM_001033145
chr9	94520511	94520511	-	Exon	1190002N15Rik	94517864	94538081	20218	NM_001033145
chr9	94519189	94519189	-	3' UTR	1190002N15Rik	94517864	94538081	20218	NM_001033145
chr9	94524568	94524568	-	Exon	1190002N15Rik	94517864	94538081	20218	NM_001033145
chr9	94537313	94537313	-	Exon	1190002N15Rik	94517864	94538081	20218	NM_001033145
chr9	94520268	94520268	-	3' UTR	1190002N15Rik	94517864	94538081	20218	NM_001033145
chr9	94520357	94520357	-	Exon	1190002N15Rik	94517864	94538081	20218	NM_001033145
chr11	73040924	73040924	+	3' UTR	1200014J11Rik	73047867	73083579	35713	NM_025818
chr11	73041091	73041091	+	3' UTR	1200014J11Rik	73047867	73083579	35713	NM_025818
chr11	73041188	73041188	+	3' UTR	1200014J11Rik	73047867	73083579	35713	NM_025818
chr11	73041310	73041310	+	3' UTR	1200014J11Rik	73047867	73083579	35713	NM_025818
chr11	73041294	73041294	+	3' UTR	1200014J11Rik	73047867	73083579	35713	NM_025818
chr16	21795902	21795902	+	Exon	1300002E11Rik	21794347	21806125	11779	NR_037957
chr16	21803114	21803114	+	Exon	1300002E11Rik	21794347	21806125	11779	NR_037957
chr16	21795871	21795871	+	Exon	1300002E11Rik	21794347	21806125	11779	NR_037957
chr16	21803373	21803373	+	Exon	1300002E11Rik	21794347	21806125	11779	NR_037957
chr3	88816665	88816665	+	Exon	1500004A13Rik	88822010	88832487	10478	NR_015498
chr3	88820552	88820552	+	Exon	1500004A13Rik	88822010	88832487	10478	NR_015498
chr3	88816514	88816514	+	Exon	1500004A13Rik	88822010	88832487	10478	NR_015498
chr3	88820224	88820224	+	Exon	1500004A13Rik	88822010	88832487	10478	NR_015498
chr3	88821134	88821134	+	Exon	1500004A13Rik	88822010	88832487	10478	NR_015498
chr3	88825667	88825667	+	Exon	1500004A13Rik	88822010	88832487	10478	NR_015498
chr3	88822329	88822329	+	Exon	1500004A13Rik	88822010	88832487	10478	NR_015498
chr3	88821264	88821264	+	Exon	1500004A13Rik	88822010	88832487	10478	NR_015498
chr3	88825624	88825624	+	Exon	1500004A13Rik	88822010	88832487	10478	NR_015498
chr5	114805060	114805060	+	3' UTR	1500011B03Rik	114808196	114813976	5781	NR_027817
chr5	114808503	114808503	-	Exon	1500011B03Rik	114808196	114813976	5781	NR_027817
chr5	114804945	114804945	+	3' UTR	1500011B03Rik	114808196	114813976	5781	NR_027817
chr5	114804425	114804425	+	3' UTR	1500011B03Rik	114808196	114813976	5781	NR_027817
chr5	114808753	114808753	-	Exon	1500011B03Rik	114808196	114813976	5781	NR_027817
chr5	114809025	114809025	-	Exon	1500011B03Rik	114808196	114813976	5781	NR_027817
chr5	114805696	114805696	+	3' UTR	1500011B03Rik	114808196	114813976	5781	NR_027817
chr5	114805313	114805313	+	3' UTR	1500011B03Rik	114808196	114813976	5781	NR_027817
chr5	114809095	114809095	-	Exon	1500011B03Rik	114808196	114813976	5781	NR_027817
chr2	127801200	127801200	-	3' UTR	1500011K16Rik	127791377	127792488	1112	NR_015476
chr2	127791784	127791784	-	Exon	1500011K16Rik	127791377	127792488	1112	NR_015476
chr2	127792460	127792460	-	Exon	1500011K16Rik	127791377	127792488	1112	NR_015476
chr2	127792446	127792446	-	Exon	1500011K16Rik	127791377	127792488	1112	NR_015476
chr2	167055522	167055522	-	Exon	1500012F01Rik	167062934	167065862	2929	NM_001081005
chr2	167056733	167056733	-	Exon	1500012F01Rik	167062934	167065862	2929	NM_001081005
chr2	167055420	167055420	-	Exon	1500012F01Rik	167062934	167065862	2929	NM_001081005
chr2	167055381	167055381	-	Exon	1500012F01Rik	167062934	167065862	2929	NM_001081005
chr18	61730809	61730809	-	3' UTR	1500015A07Rik	61726390	61728253	1864	NR_029432
chr18	61731115	61731115	-	3' UTR	1500015A07Rik	61726390	61728253	1864	NR_029432
chr18	61726473	61726473	+	Exon	1500015A07Rik	61726390	61728253	1864	NR_029432
chr18	61730847	61730847	-	3' UTR	1500015A07Rik	61726390	61728253	1864	NR_029432
chr17	24223831	24223831	-	3' UTR	1600002H07Rik	24215056	24220769	5714	NM_028056
chr17	24223614	24223614	-	3' UTR	1600002H07Rik	24215056	24220769	5714	NM_028056
chr17	24223577	24223577	-	3' UTR	1600002H07Rik	24215056	24220769	5714	NM_028056
chr17	24220028	24220028	-	Exon	1600002H07Rik	24215056	24220769	5714	NM_028056
chr17	24219808	24219808	-	Exon	1600002H07Rik	24215056	24220769	5714	NM_028056
chr17	24215383	24215383	-	3' UTR	1600002H07Rik	24215056	24220769	5714	NM_028056
chr17	24223515	24223515	-	3' UTR	1600002H07Rik	24215056	24220769	5714	NM_028056
chr17	24223859	24223859	-	3' UTR	1600002H07Rik	24215056	24220769	5714	NM_028056
chr17	24224049	24224049	-	Exon	1600002H07Rik	24215056	24220769	5714	NM_028056
chr17	24223917	24223917	-	Exon	1600002H07Rik	24215056	24220769	5714	NM_028056
chr17	24224160	24224160	-	Exon	1600002H07Rik	24215056	24220769	5714	NM_028056
chr10	80171399	80171399	+	3' UTR	1600002K03Rik	80172944	80175119	2176	NM_027207
chr10	80171555	80171555	+	3' UTR	1600002K03Rik	80172944	80175119	2176	NM_027207
chr10	80171641	80171641	+	3' UTR	1600002K03Rik	80172944	80175119	2176	NM_027207
chr17	14944245	14944245	+	3' UTR	1600012H06Rik	14943184	14945939	2756	NM_001083880
chr17	14944255	14944255	+	3' UTR	1600012H06Rik	14943184	14945939	2756	NM_001083880
chr17	14943773	14943773	+	Exon	1600012H06Rik	14943184	14945939	2756	NM_001083880
chr17	14944001	14944001	+	Exon	1600012H06Rik	14943184	14945939	2756	NM_001083880
chr17	14944232	14944232	+	3' UTR	1600012H06Rik	14943184	14945939	2756	NM_001083880
chr17	14944527	14944527	+	3' UTR	1600012H06Rik	14943184	14945939	2756	NM_001083880
chr17	14943667	14943667	+	Exon	1600012H06Rik	14943184	14945939	2756	NM_001083880
chr17	14945317	14945317	+	3' UTR	1600012H06Rik	14943184	14945939	2756	NM_001083880
chr17	14943954	14943954	+	Exon	1600012H06Rik	14943184	14945939	2756	NM_001083880
chr17	14943920	14943920	+	Exon	1600012H06Rik	14943184	14945939	2756	NM_001083880
chr17	14944123	14944123	+	Exon	1600012H06Rik	14943184	14945939	2756	NM_001083880
chr17	14944006	14944006	+	Exon	1600012H06Rik	14943184	14945939	2756	NM_001083880
chr17	14945051	14945051	-	3' UTR	1600012H06Rik	14943184	14945939	2756	NM_001083880
chr17	14944146	14944146	+	Exon	1600012H06Rik	14943184	14945939	2756	NM_001083880
chr17	14945608	14945608	+	3' UTR	1600012H06Rik	14943184	14945939	2756	NM_001083880
chr7	38196231	38196231	+	3' UTR	1600014C10Rik	38183787	38197565	13779	NM_028166
chr7	38194843	38194843	+	Exon	1600014C10Rik	38183787	38197565	13779	NM_028166
chrX	85203643	85203643	+	3' UTR	1600014K23Rik	85249677	85270291	20615	NM_028046
chrX	85204301	85204301	+	3' UTR	1600014K23Rik	85249677	85270291	20615	NM_028046
chrX	85048428	85048428	+	Intron	1600014K23Rik	85249677	85270291	20615	NM_028046
chrX	85204928	85204928	+	3' UTR	1600014K23Rik	85249677	85270291	20615	NM_028046
chr7	141205677	141205677	+	Exon	1600016N20Rik	141210043	141214080	4038	NM_028050
chr7	141206498	141206498	+	Exon	1600016N20Rik	141210043	141214080	4038	NM_028050
chr7	141211433	141211433	-	Intron	1600016N20Rik	141210043	141214080	4038	NM_028050
chr6	86527630	86527630	+	Intron	1600020E01Rik	86527401	86564449	37049	NR_037961
chr6	86527256	86527256	+	Distal Intergenic	1600020E01Rik	86527330	86564449	37120	NR_037960
chr9	99480643	99480643	-	3' UTR	1600029I14Rik	99470421	99474751	4331	NR_028123
chr9	99480550	99480550	-	3' UTR	1600029I14Rik	99470421	99474751	4331	NR_028123
chr9	99480657	99480657	-	3' UTR	1600029I14Rik	99470421	99474751	4331	NR_028123
chr17	47468439	47468439	+	Exon	1700001C19Rik	47412734	47437375	24642	NM_029296
chr17	47466443	47466443	+	Exon	1700001C19Rik	47412734	47437375	24642	NM_029296
chr17	47467599	47467599	+	Exon	1700001C19Rik	47412734	47437375	24642	NM_029296
chr17	47467386	47467386	+	Exon	1700001C19Rik	47412734	47437375	24642	NM_029296
chr17	47468442	47468442	+	Exon	1700001C19Rik	47412734	47437375	24642	NM_029296
chr17	47468201	47468201	+	Exon	1700001C19Rik	47412734	47437375	24642	NM_029296
chr17	47466202	47466202	+	Exon	1700001C19Rik	47412734	47437375	24642	NM_029296
chr17	47466074	47466074	+	Exon	1700001C19Rik	47412734	47437375	24642	NM_029296
chr17	47466181	47466181	+	Exon	1700001C19Rik	47412734	47437375	24642	NM_029296
chr17	47466369	47466369	+	Exon	1700001C19Rik	47412734	47437375	24642	NM_029296
chr17	47467498	47467498	+	Exon	1700001C19Rik	47412734	47437375	24642	NM_029296
chr17	47467478	47467478	+	Exon	1700001C19Rik	47412734	47437375	24642	NM_029296
chr17	47467463	47467463	+	Exon	1700001C19Rik	47412734	47437375	24642	NM_029296
chr17	47465808	47465808	+	Exon	1700001C19Rik	47412734	47437375	24642	NM_029296
chr17	47468310	47468310	+	Exon	1700001C19Rik	47412734	47437375	24642	NM_029296
chr17	47466661	47466661	+	Exon	1700001C19Rik	47412734	47437375	24642	NM_029296
chr17	47468187	47468187	+	Exon	1700001C19Rik	47412734	47437375	24642	NM_029296
chr17	47465757	47465757	+	Exon	1700001C19Rik	47412734	47437375	24642	NM_029296
chr17	47467416	47467416	+	Exon	1700001C19Rik	47412734	47437375	24642	NM_029296
chr17	47466475	47466475	+	Exon	1700001C19Rik	47412734	47437375	24642	NM_029296
chr17	47455689	47455689	+	Intron	1700001C19Rik	47412734	47437375	24642	NM_029296
chr17	47467446	47467446	+	Exon	1700001C19Rik	47412734	47437375	24642	NM_029296
chr17	47467476	47467476	+	Exon	1700001C19Rik	47412734	47437375	24642	NM_029296
chr17	47468163	47468163	+	Exon	1700001C19Rik	47412734	47437375	24642	NM_029296
chr17	47467217	47467217	+	Exon	1700001C19Rik	47412734	47437375	24642	NM_029296
chr17	47467358	47467358	+	Exon	1700001C19Rik	47412734	47437375	24642	NM_029296
chr17	47467554	47467554	+	Exon	1700001C19Rik	47412734	47437375	24642	NM_029296
chr17	47468659	47468659	+	Exon	1700001C19Rik	47412734	47437375	24642	NM_029296
chr17	47467461	47467461	+	Exon	1700001C19Rik	47412734	47437375	24642	NM_029296
chr17	47467751	47467751	+	Exon	1700001C19Rik	47412734	47437375	24642	NM_029296
chr17	47469529	47469529	+	3' UTR	1700001C19Rik	47412734	47437375	24642	NM_029296
chr17	47467776	47467776	+	Exon	1700001C19Rik	47412734	47437375	24642	NM_029296
chr17	47466834	47466834	+	Exon	1700001C19Rik	47412734	47437375	24642	NM_029296
chr17	47468165	47468165	+	Exon	1700001C19Rik	47412734	47437375	24642	NM_029296
chr17	47466269	47466269	+	Exon	1700001C19Rik	47412734	47437375	24642	NM_029296
chr17	47469591	47469591	+	3' UTR	1700001C19Rik	47412734	47437375	24642	NM_029296
chr17	47467949	47467949	+	Exon	1700001C19Rik	47412734	47437375	24642	NM_029296
chr17	47468554	47468554	+	Exon	1700001C19Rik	47412734	47437375	24642	NM_029296
chr17	47468111	47468111	+	Exon	1700001C19Rik	47412734	47437375	24642	NM_029296
chr17	47468823	47468823	+	Exon	1700001C19Rik	47412734	47437375	24642	NM_029296
chr17	47468451	47468451	+	Exon	1700001C19Rik	47412734	47437375	24642	NM_029296
chr17	47468480	47468480	+	Exon	1700001C19Rik	47412734	47437375	24642	NM_029296
chr17	47467340	47467340	+	Exon	1700001C19Rik	47412734	47437375	24642	NM_029296
chr17	47466490	47466490	+	Exon	1700001C19Rik	47412734	47437375	24642	NM_029296
chr17	47469549	47469549	+	3' UTR	1700001C19Rik	47412734	47437375	24642	NM_029296
chr17	47467004	47467004	+	Exon	1700001C19Rik	47412734	47437375	24642	NM_029296
chr17	47466714	47466714	+	Exon	1700001C19Rik	47412734	47437375	24642	NM_029296
chr17	47469330	47469330	+	Exon	1700001C19Rik	47412734	47437375	24642	NM_029296
chr17	47467145	47467145	+	Exon	1700001C19Rik	47412734	47437375	24642	NM_029296
chr17	47468011	47468011	+	Exon	1700001C19Rik	47412734	47437375	24642	NM_029296
chr17	47469370	47469370	+	Exon	1700001C19Rik	47412734	47437375	24642	NM_029296
chr17	47468514	47468514	+	Exon	1700001C19Rik	47412734	47437375	24642	NM_029296
chr17	47469761	47469761	+	3' UTR	1700001C19Rik	47412734	47437375	24642	NM_029296
chr17	47466987	47466987	+	Exon	1700001C19Rik	47412734	47437375	24642	NM_029296
chr17	47466854	47466854	+	Exon	1700001C19Rik	47412734	47437375	24642	NM_029296
chr17	47468100	47468100	+	Exon	1700001C19Rik	47412734	47437375	24642	NM_029296
chr17	47467958	47467958	+	Exon	1700001C19Rik	47412734	47437375	24642	NM_029296
chr17	47468093	47468093	+	Exon	1700001C19Rik	47412734	47437375	24642	NM_029296
chr17	47469415	47469415	+	3' UTR	1700001C19Rik	47412734	47437375	24642	NM_029296
chr17	47469497	47469497	+	3' UTR	1700001C19Rik	47412734	47437375	24642	NM_029296
chr17	47469127	47469127	+	Intron	1700001C19Rik	47412734	47437375	24642	NM_029296
chr17	47468572	47468572	+	Exon	1700001C19Rik	47412734	47437375	24642	NM_029296
chr17	47468507	47468507	+	Exon	1700001C19Rik	47412734	47437375	24642	NM_029296
chr17	47467330	47467330	+	Exon	1700001C19Rik	47412734	47437375	24642	NM_029296
chr17	47466843	47466843	+	Exon	1700001C19Rik	47412734	47437375	24642	NM_029296
chr17	47469719	47469719	+	3' UTR	1700001C19Rik	47412734	47437375	24642	NM_029296
chr8	61374272	61374272	+	Exon	1700001D01Rik	61281522	61288872	7351	NR_045475
chr8	61363176	61363176	+	Exon	1700001D01Rik	61281522	61288872	7351	NR_045475
chr14	66297530	66297530	+	Exon	1700001G11Rik	66295329	66297129	1801	NR_038077
chr14	66309088	66309088	+	Exon	1700001G11Rik	66295329	66297129	1801	NR_038077
chr14	66310204	66310204	+	3' UTR	1700001G11Rik	66295329	66297129	1801	NR_038077
chr14	66310795	66310795	+	3' UTR	1700001G11Rik	66295329	66297129	1801	NR_038077
chr14	66297271	66297271	+	Exon	1700001G11Rik	66295329	66297129	1801	NR_038077
chr14	66309329	66309329	+	Exon	1700001G11Rik	66295329	66297129	1801	NR_038077
chr14	66310482	66310482	+	3' UTR	1700001G11Rik	66295329	66297129	1801	NR_038077
chr14	66297458	66297458	+	Exon	1700001G11Rik	66295329	66297129	1801	NR_038077
chr14	66310097	66310097	+	3' UTR	1700001G11Rik	66295329	66297129	1801	NR_038077
chr14	66309351	66309351	+	3' UTR	1700001G11Rik	66295329	66297129	1801	NR_038077
chr14	66309221	66309221	+	Exon	1700001G11Rik	66295329	66297129	1801	NR_038077
chr14	66310816	66310816	+	3' UTR	1700001G11Rik	66295329	66297129	1801	NR_038077
chr14	66309914	66309914	+	3' UTR	1700001G11Rik	66295329	66297129	1801	NR_038077
chr14	66309182	66309182	+	Exon	1700001G11Rik	66295329	66297129	1801	NR_038077
chr14	66309353	66309353	+	3' UTR	1700001G11Rik	66295329	66297129	1801	NR_038077
chr12	110656603	110656603	+	Exon	1700001K19Rik	110667689	110682619	14931	NM_025488
chr12	110646256	110646256	+	Exon	1700001K19Rik	110667689	110682619	14931	NM_025488
chr12	110654793	110654793	+	Exon	1700001K19Rik	110667689	110682619	14931	NM_025488
chr12	110651536	110651536	+	Exon	1700001K19Rik	110667689	110682619	14931	NM_025488
chr12	110665201	110665201	+	Exon	1700001K19Rik	110667689	110682619	14931	NM_025488
chr12	110642046	110642046	+	Exon	1700001K19Rik	110667689	110682619	14931	NM_025488
chr12	110666391	110666391	+	Exon	1700001K19Rik	110667689	110682619	14931	NM_025488
chr12	110666837	110666837	+	3' UTR	1700001K19Rik	110667689	110682619	14931	NM_025488
chr12	110666880	110666880	+	3' UTR	1700001K19Rik	110667689	110682619	14931	NM_025488
chr12	110657936	110657936	+	Exon	1700001K19Rik	110667689	110682619	14931	NM_025488
chr12	110662675	110662675	+	Exon	1700001K19Rik	110667689	110682619	14931	NM_025488
chr12	110657077	110657077	+	Exon	1700001K19Rik	110667689	110682619	14931	NM_025488
chr12	110666324	110666324	+	Exon	1700001K19Rik	110667689	110682619	14931	NM_025488
chr12	110649944	110649944	+	Exon	1700001K19Rik	110667689	110682619	14931	NM_025488
chr12	110666618	110666618	+	Exon	1700001K19Rik	110667689	110682619	14931	NM_025488
chr12	110654314	110654314	+	Exon	1700001K19Rik	110667689	110682619	14931	NM_025488
chr12	110654260	110654260	+	Exon	1700001K19Rik	110667689	110682619	14931	NM_025488
chr12	110652109	110652109	+	Exon	1700001K19Rik	110667689	110682619	14931	NM_025488
chr12	110662598	110662598	+	Exon	1700001K19Rik	110667689	110682619	14931	NM_025488
chr12	110667766	110667766	+	3' UTR	1700001K19Rik	110667689	110682619	14931	NM_025488
chr12	110667917	110667917	+	Intron	1700001K19Rik	110667689	110682619	14931	NM_025488
chr12	110666585	110666585	+	Exon	1700001K19Rik	110667689	110682619	14931	NM_025488
chr12	110661210	110661210	+	Exon	1700001K19Rik	110667689	110682619	14931	NM_025488
chr12	110658909	110658909	+	Exon	1700001K19Rik	110667689	110682619	14931	NM_025488
chr12	110655429	110655429	+	Exon	1700001K19Rik	110667689	110682619	14931	NM_025488
chr12	110666698	110666698	+	3' UTR	1700001K19Rik	110667689	110682619	14931	NM_025488
chr12	110649553	110649553	+	Exon	1700001K19Rik	110667689	110682619	14931	NM_025488
chr12	110646265	110646265	+	Exon	1700001K19Rik	110667689	110682619	14931	NM_025488
chr12	110656302	110656302	+	Exon	1700001K19Rik	110667689	110682619	14931	NM_025488
chr12	110662665	110662665	+	Exon	1700001K19Rik	110667689	110682619	14931	NM_025488
chr12	110649506	110649506	+	Exon	1700001K19Rik	110667689	110682619	14931	NM_025488
chr12	110666907	110666907	+	3' UTR	1700001K19Rik	110667689	110682619	14931	NM_025488
chr12	110651524	110651524	+	Exon	1700001K19Rik	110667689	110682619	14931	NM_025488
chr12	110667647	110667647	+	Downstream (<1kb)	1700001K19Rik	110667689	110682619	14931	NM_025488
chr12	110651538	110651538	+	Exon	1700001K19Rik	110667689	110682619	14931	NM_025488
chr12	110657060	110657060	+	Exon	1700001K19Rik	110667689	110682619	14931	NM_025488
chr12	110663035	110663035	+	Exon	1700001K19Rik	110667689	110682619	14931	NM_025488
chr12	110661433	110661433	+	Exon	1700001K19Rik	110667689	110682619	14931	NM_025488
chr12	110666683	110666683	+	Exon	1700001K19Rik	110667689	110682619	14931	NM_025488
chr12	110649346	110649346	+	Exon	1700001K19Rik	110667689	110682619	14931	NM_025488
chr12	110661221	110661221	+	Exon	1700001K19Rik	110667689	110682619	14931	NM_025488
chr12	110661396	110661396	+	Exon	1700001K19Rik	110667689	110682619	14931	NM_025488
chr12	110666782	110666782	+	3' UTR	1700001K19Rik	110667689	110682619	14931	NM_025488
chr19	53245171	53245171	+	Exon	1700001K23Rik	53248736	53255205	6470	NR_036590
chr19	53245367	53245367	+	3' UTR	1700001K23Rik	53248736	53255205	6470	NR_036590
chr19	53238442	53238442	+	Exon	1700001K23Rik	53248736	53255205	6470	NR_036590
chr19	53244473	53244473	+	Intron	1700001K23Rik	53248736	53255205	6470	NR_036590
chr19	53245489	53245489	+	3' UTR	1700001K23Rik	53248736	53255205	6470	NR_036590
chr19	53245037	53245037	+	Exon	1700001K23Rik	53248736	53255205	6470	NR_036590
chr19	53246271	53246271	+	3' UTR	1700001K23Rik	53248736	53255205	6470	NR_036590
chr19	53245415	53245415	+	3' UTR	1700001K23Rik	53248736	53255205	6470	NR_036590
chr19	53246646	53246646	+	3' UTR	1700001K23Rik	53248736	53255205	6470	NR_036590
chr19	53246723	53246723	+	3' UTR	1700001K23Rik	53248736	53255205	6470	NR_036590
chr19	53216812	53216812	+	5' UTR	1700001K23Rik	53248736	53255205	6470	NR_036590
chr19	53245769	53245769	+	3' UTR	1700001K23Rik	53248736	53255205	6470	NR_036590
chr19	53245686	53245686	+	3' UTR	1700001K23Rik	53248736	53255205	6470	NR_036590
chr19	53245139	53245139	+	Exon	1700001K23Rik	53248736	53255205	6470	NR_036590
chr19	53246487	53246487	+	3' UTR	1700001K23Rik	53248736	53255205	6470	NR_036590
chr19	53245262	53245262	+	Exon	1700001K23Rik	53248736	53255205	6470	NR_036590
chr19	53245455	53245455	+	3' UTR	1700001K23Rik	53248736	53255205	6470	NR_036590
chr19	53245405	53245405	+	3' UTR	1700001K23Rik	53248736	53255205	6470	NR_036590
chr19	53245885	53245885	+	3' UTR	1700001K23Rik	53248736	53255205	6470	NR_036590
chr19	53246449	53246449	+	3' UTR	1700001K23Rik	53248736	53255205	6470	NR_036590
chr19	53246927	53246927	+	3' UTR	1700001K23Rik	53248736	53255205	6470	NR_036590
chr19	53245431	53245431	+	3' UTR	1700001K23Rik	53248736	53255205	6470	NR_036590
chr19	53246470	53246470	+	3' UTR	1700001K23Rik	53248736	53255205	6470	NR_036590
chr19	53245857	53245857	+	3' UTR	1700001K23Rik	53248736	53255205	6470	NR_036590
chr19	53246428	53246428	+	3' UTR	1700001K23Rik	53248736	53255205	6470	NR_036590
chr19	53246151	53246151	+	3' UTR	1700001K23Rik	53248736	53255205	6470	NR_036590
chr19	53246425	53246425	+	3' UTR	1700001K23Rik	53248736	53255205	6470	NR_036590
chr19	53246231	53246231	+	3' UTR	1700001K23Rik	53248736	53255205	6470	NR_036590
chr19	53245751	53245751	+	3' UTR	1700001K23Rik	53248736	53255205	6470	NR_036590
chr19	53246844	53246844	+	3' UTR	1700001K23Rik	53248736	53255205	6470	NR_036590
chr19	53246915	53246915	+	3' UTR	1700001K23Rik	53248736	53255205	6470	NR_036590
chr19	53245552	53245552	+	3' UTR	1700001K23Rik	53248736	53255205	6470	NR_036590
chr15	83385027	83385027	-	Exon	1700001L05Rik	83353847	83367297	13451	NR_027980
chr15	83376961	83376961	-	3' UTR	1700001L05Rik	83353847	83367297	13451	NR_027980
chr15	83379080	83379080	-	Exon	1700001L05Rik	83353847	83367297	13451	NR_027980
chr15	83381811	83381811	-	Exon	1700001L05Rik	83353847	83367297	13451	NR_027980
chr15	83377403	83377403	-	3' UTR	1700001L05Rik	83353847	83367297	13451	NR_027980
chr15	83377254	83377254	-	3' UTR	1700001L05Rik	83353847	83367297	13451	NR_027980
chr15	83379157	83379157	-	Exon	1700001L05Rik	83353847	83367297	13451	NR_027980
chr15	83377678	83377678	-	Exon	1700001L05Rik	83353847	83367297	13451	NR_027980
chr15	83377491	83377491	-	3' UTR	1700001L05Rik	83353847	83367297	13451	NR_027980
chr15	83376557	83376557	-	3' UTR	1700001L05Rik	83353847	83367297	13451	NR_027980
chr11	97777943	97777943	-	3' UTR	1700001P01Rik	97771481	97775918	4438	NM_028156
chr11	97777986	97777986	-	3' UTR	1700001P01Rik	97771481	97775918	4438	NM_028156
chr11	97777592	97777592	-	3' UTR	1700001P01Rik	97771481	97775918	4438	NM_028156
chr11	97778377	97778377	-	Exon	1700001P01Rik	97771481	97775918	4438	NM_028156
chr2	154535838	154535838	+	3' UTR	1700003F12Rik	154548904	154550048	1145	NM_029305
chr2	154535353	154535353	+	3' UTR	1700003F12Rik	154548904	154550048	1145	NM_029305
chr2	154537767	154537767	+	3' UTR	1700003F12Rik	154548904	154550048	1145	NM_029305
chr2	154534894	154534894	+	Exon	1700003F12Rik	154548904	154550048	1145	NM_029305
chr2	154504650	154504650	+	5' UTR	1700003F12Rik	154548904	154550048	1145	NM_029305
chr2	154535107	154535107	+	Exon	1700003F12Rik	154548904	154550048	1145	NM_029305
chr2	154536386	154536386	+	3' UTR	1700003F12Rik	154548904	154550048	1145	NM_029305
chr2	154536586	154536586	+	3' UTR	1700003F12Rik	154548904	154550048	1145	NM_029305
chr2	154538633	154538633	+	3' UTR	1700003F12Rik	154548904	154550048	1145	NM_029305
chr2	154536604	154536604	+	3' UTR	1700003F12Rik	154548904	154550048	1145	NM_029305
chr2	154531265	154531265	+	Exon	1700003F12Rik	154548904	154550048	1145	NM_029305
chr2	154535112	154535112	+	Exon	1700003F12Rik	154548904	154550048	1145	NM_029305
chr2	154537582	154537582	+	3' UTR	1700003F12Rik	154548904	154550048	1145	NM_029305
chr2	154536016	154536016	+	3' UTR	1700003F12Rik	154548904	154550048	1145	NM_029305
chr2	154535621	154535621	+	3' UTR	1700003F12Rik	154548904	154550048	1145	NM_029305
chr2	154535642	154535642	+	3' UTR	1700003F12Rik	154548904	154550048	1145	NM_029305
chr2	154539240	154539240	+	3' UTR	1700003F12Rik	154548904	154550048	1145	NM_029305
chr2	154535800	154535800	+	3' UTR	1700003F12Rik	154548904	154550048	1145	NM_029305
chr2	154535963	154535963	+	3' UTR	1700003F12Rik	154548904	154550048	1145	NM_029305
chr2	154535541	154535541	+	3' UTR	1700003F12Rik	154548904	154550048	1145	NM_029305
chr2	154535253	154535253	+	3' UTR	1700003F12Rik	154548904	154550048	1145	NM_029305
chr2	154535188	154535188	+	3' UTR	1700003F12Rik	154548904	154550048	1145	NM_029305
chr2	154535664	154535664	+	3' UTR	1700003F12Rik	154548904	154550048	1145	NM_029305
chr2	154535193	154535193	+	3' UTR	1700003F12Rik	154548904	154550048	1145	NM_029305
chr2	154538567	154538567	+	3' UTR	1700003F12Rik	154548904	154550048	1145	NM_029305
chr9	45345317	45345317	+	Exon	1700003G13Rik	45318266	45322079	3814	NR_040720
chr9	45332500	45332500	+	Exon	1700003G13Rik	45318266	45322079	3814	NR_040720
chr9	45338351	45338351	+	Exon	1700003G13Rik	45318266	45322079	3814	NR_040720
chr11	59759368	59759368	+	Intron	1700007J10Rik	59725917	59740154	14238	NR_045476
chr11	59759713	59759713	+	Intron	1700007J10Rik	59725917	59740154	14238	NR_045476
chr11	59760771	59760771	+	Intron	1700007J10Rik	59725917	59740154	14238	NR_045476
chr11	59759945	59759945	+	Intron	1700007J10Rik	59725917	59740154	14238	NR_045476
chr11	59737366	59737366	+	Intron	1700007J10Rik	59725917	59740154	14238	NR_045476
chr11	59760256	59760256	+	Intron	1700007J10Rik	59725917	59740154	14238	NR_045476
chr11	59761066	59761066	+	Intron	1700007J10Rik	59725917	59740154	14238	NR_045476
chr11	59737400	59737400	+	Intron	1700007J10Rik	59725917	59740154	14238	NR_045476
chr11	59752884	59752884	+	Exon	1700007J10Rik	59725917	59740154	14238	NR_045476
chr11	59749582	59749582	+	Exon	1700007J10Rik	59725917	59740154	14238	NR_045476
chr11	59741185	59741185	+	Exon	1700007J10Rik	59725917	59740154	14238	NR_045476
chr11	59759866	59759866	+	Intron	1700007J10Rik	59725917	59740154	14238	NR_045476
chr11	59752970	59752970	+	Exon	1700007J10Rik	59725917	59740154	14238	NR_045476
chr11	59753008	59753008	+	Exon	1700007J10Rik	59725917	59740154	14238	NR_045476
chr11	59752810	59752810	+	Exon	1700007J10Rik	59725917	59740154	14238	NR_045476
chr11	59741915	59741915	+	Intron	1700007J10Rik	59725917	59740154	14238	NR_045476
chr11	59760169	59760169	+	Intron	1700007J10Rik	59725917	59740154	14238	NR_045476
chr11	59752855	59752855	+	Exon	1700007J10Rik	59725917	59740154	14238	NR_045476
chr11	59752839	59752839	+	Exon	1700007J10Rik	59725917	59740154	14238	NR_045476
chr11	59748492	59748492	+	Intron	1700007J10Rik	59725917	59740154	14238	NR_045476
chr11	59740677	59740677	+	Intron	1700007J10Rik	59725917	59740154	14238	NR_045476
chr11	59759192	59759192	+	Intron	1700007J10Rik	59725917	59740154	14238	NR_045476
chr11	59752837	59752837	+	Exon	1700007J10Rik	59725917	59740154	14238	NR_045476
chr11	59737392	59737392	+	Intron	1700007J10Rik	59725917	59740154	14238	NR_045476
chr11	59761844	59761844	+	Intron	1700007J10Rik	59725917	59740154	14238	NR_045476
chr11	59752823	59752823	+	Exon	1700007J10Rik	59725917	59740154	14238	NR_045476
chr11	59752642	59752642	+	Exon	1700007J10Rik	59725917	59740154	14238	NR_045476
chr11	59758986	59758986	+	Intron	1700007J10Rik	59725917	59740154	14238	NR_045476
chr11	59752861	59752861	+	Exon	1700007J10Rik	59725917	59740154	14238	NR_045476
chr11	59757940	59757940	+	Intron	1700007J10Rik	59725917	59740154	14238	NR_045476
chr11	59761071	59761071	+	Intron	1700007J10Rik	59725917	59740154	14238	NR_045476
chr11	59758220	59758220	+	Intron	1700007J10Rik	59725917	59740154	14238	NR_045476
chr11	59758428	59758428	+	Intron	1700007J10Rik	59725917	59740154	14238	NR_045476
chr11	59760999	59760999	+	Intron	1700007J10Rik	59725917	59740154	14238	NR_045476
chr11	59758068	59758068	+	Intron	1700007J10Rik	59725917	59740154	14238	NR_045476
chr2	28462292	28462292	-	Exon	1700007K13Rik	28462001	28466324	4324	NM_027040
chr7	127511949	127511949	-	Exon	1700008J07Rik	127510438	127512869	2432	NR_024331
chr7	127512037	127512037	+	Exon	1700008J07Rik	127510438	127512869	2432	NR_024331
chr7	127514182	127514182	+	Distal Intergenic	1700008J07Rik	127510438	127512869	2432	NR_024331
chr7	44357402	44357402	+	3' UTR	1700008O03Rik	44360045	44375030	14986	NM_027049
chr7	44352054	44352054	+	Exon	1700008O03Rik	44360045	44375030	14986	NM_027049
chr7	44354100	44354100	+	Exon	1700008O03Rik	44360045	44375030	14986	NM_027049
chr10	77886506	77886506	+	Exon	1700009J07Rik	77893420	77896111	2692	NR_015547
chr10	77892999	77892999	+	Distal Intergenic	1700009J07Rik	77893420	77896111	2692	NR_015547
chr10	77886767	77886767	+	3' UTR	1700009J07Rik	77893420	77896111	2692	NR_015547
chr10	77884496	77884496	+	Intron	1700009J07Rik	77893420	77896111	2692	NR_015547
chr10	77886572	77886572	+	Exon	1700009J07Rik	77893420	77896111	2692	NR_015547
chr10	77886877	77886877	+	Distal Intergenic	1700009J07Rik	77893420	77896111	2692	NR_015547
chr10	77893531	77893531	+	Exon	1700009J07Rik	77893420	77896111	2692	NR_015547
chr10	77881078	77881078	+	Exon	1700009J07Rik	77893420	77896111	2692	NR_015547
chr1	171129774	171129774	-	3' UTR	1700009P17Rik	171121661	171126967	5307	NM_001081275
chr1	171129241	171129241	-	3' UTR	1700009P17Rik	171121661	171126967	5307	NM_001081275
chr1	171129422	171129422	-	3' UTR	1700009P17Rik	171121661	171126967	5307	NM_001081275
chr1	171129464	171129464	-	3' UTR	1700009P17Rik	171121661	171126967	5307	NM_001081275
chr1	171129576	171129576	-	3' UTR	1700009P17Rik	171121661	171126967	5307	NM_001081275
chr17	87380593	87380593	+	3' UTR	1700011E24Rik	87389571	87427741	38171	NM_029298
chr17	87434048	87434048	-	Exon	1700011E24Rik	87389571	87427741	38171	NM_029298
chr17	87435108	87435108	-	Exon	1700011E24Rik	87389571	87427741	38171	NM_029298
chr17	87380454	87380454	+	3' UTR	1700011E24Rik	87389571	87427741	38171	NM_029298
chr17	87380748	87380748	+	3' UTR	1700011E24Rik	87389571	87427741	38171	NM_029298
chr17	87435915	87435915	-	Exon	1700011E24Rik	87389571	87427741	38171	NM_029298
chr17	87381394	87381394	+	3' UTR	1700011E24Rik	87389571	87427741	38171	NM_029298
chr17	87435907	87435907	-	Exon	1700011E24Rik	87389571	87427741	38171	NM_029298
chr17	87435145	87435145	-	Exon	1700011E24Rik	87389571	87427741	38171	NM_029298
chr17	87435817	87435817	-	Exon	1700011E24Rik	87389571	87427741	38171	NM_029298
chr17	87381724	87381724	+	3' UTR	1700011E24Rik	87389571	87427741	38171	NM_029298
chr17	87380275	87380275	+	3' UTR	1700011E24Rik	87389571	87427741	38171	NM_029298
chr17	87434017	87434017	-	3' UTR	1700011E24Rik	87389571	87427741	38171	NM_029298
chr17	87433656	87433656	-	3' UTR	1700011E24Rik	87389571	87427741	38171	NM_029298
chr17	87380332	87380332	+	3' UTR	1700011E24Rik	87389571	87427741	38171	NM_029298
chr17	87433960	87433960	-	3' UTR	1700011E24Rik	87389571	87427741	38171	NM_029298
chr8	79192390	79192390	+	3' UTR	1700011L22Rik	79210430	79248583	38154	NM_026315
chr8	79190525	79190525	+	3' UTR	1700011L22Rik	79210430	79248583	38154	NM_026315
chr8	79268024	79268024	-	Exon	1700011L22Rik	79210430	79248583	38154	NM_026315
chr8	79190535	79190535	+	3' UTR	1700011L22Rik	79210430	79248583	38154	NM_026315
chr8	79190459	79190459	+	3' UTR	1700011L22Rik	79210430	79248583	38154	NM_026315
chr8	79190519	79190519	+	3' UTR	1700011L22Rik	79210430	79248583	38154	NM_026315
chr8	79190435	79190435	+	3' UTR	1700011L22Rik	79210430	79248583	38154	NM_026315
chr8	79190320	79190320	+	3' UTR	1700011L22Rik	79210430	79248583	38154	NM_026315
chr8	79192317	79192317	+	3' UTR	1700011L22Rik	79210430	79248583	38154	NM_026315
chr8	79192671	79192671	+	3' UTR	1700011L22Rik	79210430	79248583	38154	NM_026315
chr8	79192680	79192680	+	3' UTR	1700011L22Rik	79210430	79248583	38154	NM_026315
chr8	79271469	79271469	-	Intron	1700011L22Rik	79210430	79248583	38154	NM_026315
chr8	79192958	79192958	+	3' UTR	1700011L22Rik	79210430	79248583	38154	NM_026315
chr8	79190550	79190550	+	3' UTR	1700011L22Rik	79210430	79248583	38154	NM_026315
chr9	57253525	57253525	-	3' UTR	1700017B05Rik	57252322	57262599	10278	NM_028820
chr9	57253556	57253556	-	3' UTR	1700017B05Rik	57252322	57262599	10278	NM_028820
chr9	57253825	57253825	-	3' UTR	1700017B05Rik	57252322	57262599	10278	NM_028820
chr9	57256742	57256742	-	Exon	1700017B05Rik	57252322	57262599	10278	NM_028820
chr9	57257062	57257062	-	Exon	1700017B05Rik	57252322	57262599	10278	NM_028820
chr9	57257635	57257635	-	Exon	1700017B05Rik	57252322	57262599	10278	NM_028820
chr9	57257486	57257486	-	Exon	1700017B05Rik	57252322	57262599	10278	NM_028820
chr9	57258891	57258891	-	Exon	1700017B05Rik	57252322	57262599	10278	NM_028820
chr9	57256680	57256680	-	Exon	1700017B05Rik	57252322	57262599	10278	NM_028820
chr9	57253486	57253486	-	3' UTR	1700017B05Rik	57252322	57262599	10278	NM_028820
chr9	57259103	57259103	-	5' UTR	1700017B05Rik	57252322	57262599	10278	NM_028820
chr9	57253921	57253921	-	3' UTR	1700017B05Rik	57252322	57262599	10278	NM_028820
chr9	57253976	57253976	-	Exon	1700017B05Rik	57252322	57262599	10278	NM_028820
chr9	57258491	57258491	-	Exon	1700017B05Rik	57252322	57262599	10278	NM_028820
chr9	57253939	57253939	-	3' UTR	1700017B05Rik	57252322	57262599	10278	NM_028820
chr9	57258821	57258821	-	Exon	1700017B05Rik	57252322	57262599	10278	NM_028820
chr9	57257991	57257991	-	Exon	1700017B05Rik	57252322	57262599	10278	NM_028820
chr9	57256406	57256406	-	Exon	1700017B05Rik	57252322	57262599	10278	NM_028820
chr9	57257558	57257558	-	Exon	1700017B05Rik	57252322	57262599	10278	NM_028820
chr9	57256880	57256880	-	Exon	1700017B05Rik	57252322	57262599	10278	NM_028820
chr9	57258113	57258113	-	Exon	1700017B05Rik	57252322	57262599	10278	NM_028820
chr9	57257219	57257219	-	Exon	1700017B05Rik	57252322	57262599	10278	NM_028820
chr9	57258092	57258092	-	Exon	1700017B05Rik	57252322	57262599	10278	NM_028820
chr9	57258345	57258345	-	Exon	1700017B05Rik	57252322	57262599	10278	NM_028820
chr9	57257388	57257388	-	Exon	1700017B05Rik	57252322	57262599	10278	NM_028820
chr9	57258666	57258666	-	Exon	1700017B05Rik	57252322	57262599	10278	NM_028820
chr9	57253841	57253841	-	3' UTR	1700017B05Rik	57252322	57262599	10278	NM_028820
chr9	57253414	57253414	-	3' UTR	1700017B05Rik	57252322	57262599	10278	NM_028820
chr9	57259006	57259006	-	Exon	1700017B05Rik	57252322	57262599	10278	NM_028820
chr9	57253246	57253246	-	3' UTR	1700017B05Rik	57252322	57262599	10278	NM_028820
chr9	57258673	57258673	-	Exon	1700017B05Rik	57252322	57262599	10278	NM_028820
chr9	57258407	57258407	-	Exon	1700017B05Rik	57252322	57262599	10278	NM_028820
chr9	57258271	57258271	-	Exon	1700017B05Rik	57252322	57262599	10278	NM_028820
chr9	57253272	57253272	-	3' UTR	1700017B05Rik	57252322	57262599	10278	NM_028820
chr9	57258825	57258825	-	Exon	1700017B05Rik	57252322	57262599	10278	NM_028820
chr9	57258645	57258645	-	Exon	1700017B05Rik	57252322	57262599	10278	NM_028820
chr9	57258005	57258005	-	Exon	1700017B05Rik	57252322	57262599	10278	NM_028820
chr9	57257223	57257223	-	Exon	1700017B05Rik	57252322	57262599	10278	NM_028820
chr9	57257903	57257903	-	Exon	1700017B05Rik	57252322	57262599	10278	NM_028820
chr9	57253148	57253148	-	3' UTR	1700017B05Rik	57252322	57262599	10278	NM_028820
chr9	57257169	57257169	-	Exon	1700017B05Rik	57252322	57262599	10278	NM_028820
chr9	57256870	57256870	-	Exon	1700017B05Rik	57252322	57262599	10278	NM_028820
chr9	57256795	57256795	-	Exon	1700017B05Rik	57252322	57262599	10278	NM_028820
chr9	57258974	57258974	-	Exon	1700017B05Rik	57252322	57262599	10278	NM_028820
chr9	57257405	57257405	-	Exon	1700017B05Rik	57252322	57262599	10278	NM_028820
chr9	57258962	57258962	-	Exon	1700017B05Rik	57252322	57262599	10278	NM_028820
chr19	29025615	29025615	+	Intron	1700018L02Rik	29047483	29048729	1247	NR_028360
chr19	29026206	29026206	+	Intron	1700018L02Rik	29047483	29048729	1247	NR_028360
chr19	29021050	29021050	-	3' UTR	1700018L02Rik	29047483	29048729	1247	NR_028360
chr19	29025608	29025608	+	Intron	1700018L02Rik	29047483	29048729	1247	NR_028360
chr19	29022631	29022631	-	3' UTR	1700018L02Rik	29047483	29048729	1247	NR_028360
chr19	29022870	29022870	-	Exon	1700018L02Rik	29047483	29048729	1247	NR_028360
chr19	29022348	29022348	-	3' UTR	1700018L02Rik	29047483	29048729	1247	NR_028360
chr19	29021940	29021940	-	3' UTR	1700018L02Rik	29047483	29048729	1247	NR_028360
chr19	29026227	29026227	+	Exon	1700018L02Rik	29047483	29048729	1247	NR_028360
chr19	29021855	29021855	-	3' UTR	1700018L02Rik	29047483	29048729	1247	NR_028360
chr19	29021706	29021706	-	3' UTR	1700018L02Rik	29047483	29048729	1247	NR_028360
chr19	29022747	29022747	-	3' UTR	1700018L02Rik	29047483	29048729	1247	NR_028360
chr19	29037929	29037929	-	Exon	1700018L02Rik	29047483	29048729	1247	NR_028360
chr19	29022120	29022120	-	3' UTR	1700018L02Rik	29047483	29048729	1247	NR_028360
chr19	29019290	29019290	+	Downstream (1-2kb)	1700018L02Rik	29047483	29048729	1247	NR_028360
chr19	29020958	29020958	-	3' UTR	1700018L02Rik	29047483	29048729	1247	NR_028360
chr19	29022650	29022650	-	3' UTR	1700018L02Rik	29047483	29048729	1247	NR_028360
chr19	29022183	29022183	-	3' UTR	1700018L02Rik	29047483	29048729	1247	NR_028360
chr1	53196885	53196885	-	Exon	1700019A02Rik	53158577	53187617	29041	NM_027070
chr1	53197153	53197153	-	Exon	1700019A02Rik	53158577	53187617	29041	NM_027070
chr1	53197167	53197167	-	Exon	1700019A02Rik	53158577	53187617	29041	NM_027070
chr8	3476198	3476198	+	Exon	1700019B03Rik	3470862	3487178	16317	NM_029598
chr6	6042219	6042219	-	Exon	1700019G24Rik	5963897	5977393	13497	NR_040255
chr6	6041698	6041698	-	3' UTR	1700019G24Rik	5963897	5977393	13497	NR_040255
chr6	6042153	6042153	-	Exon	1700019G24Rik	5963897	5977393	13497	NR_040255
chr6	6042141	6042141	-	3' UTR	1700019G24Rik	5963897	5977393	13497	NR_040255
chr19	58799356	58799356	-	3' UTR	1700019N19Rik	58785803	58794414	8612	NM_026208
chr19	58796919	58796919	-	3' UTR	1700019N19Rik	58785803	58794414	8612	NM_026208
chr19	58798049	58798049	-	3' UTR	1700019N19Rik	58785803	58794414	8612	NM_026208
chr19	58797964	58797964	-	3' UTR	1700019N19Rik	58785803	58794414	8612	NM_026208
chr19	58796931	58796931	-	3' UTR	1700019N19Rik	58785803	58794414	8612	NM_026208
chr2	119600584	119600584	+	Exon	1700020I14Rik	119594296	119600744	6449	NR_015473
chr2	119600453	119600453	+	Exon	1700020I14Rik	119594296	119600744	6449	NR_015473
chr2	119599729	119599729	+	Exon	1700020I14Rik	119594296	119600744	6449	NR_015473
chr2	119600566	119600566	+	Exon	1700020I14Rik	119594296	119600744	6449	NR_015473
chr2	119599602	119599602	+	Exon	1700020I14Rik	119594296	119600744	6449	NR_015473
chr2	119600086	119600086	+	Exon	1700020I14Rik	119594296	119600744	6449	NR_015473
chr2	119600407	119600407	+	Exon	1700020I14Rik	119594296	119600744	6449	NR_015473
chr2	119602122	119602122	+	Distal Intergenic	1700020I14Rik	119594296	119600744	6449	NR_015473
chr2	119599701	119599701	+	Exon	1700020I14Rik	119594296	119600744	6449	NR_015473
chr2	119585804	119585804	+	3' UTR	1700020I14Rik	119594296	119600744	6449	NR_015473
chr2	119599859	119599859	+	Exon	1700020I14Rik	119594296	119600744	6449	NR_015473
chr2	119599821	119599821	+	Exon	1700020I14Rik	119594296	119600744	6449	NR_015473
chr2	119600351	119600351	+	Exon	1700020I14Rik	119594296	119600744	6449	NR_015473
chr2	119600498	119600498	+	Exon	1700020I14Rik	119594296	119600744	6449	NR_015473
chr2	119604191	119604191	+	Distal Intergenic	1700020I14Rik	119594296	119600744	6449	NR_015473
chr2	119603447	119603447	+	Distal Intergenic	1700020I14Rik	119594296	119600744	6449	NR_015473
chr2	119586411	119586411	+	3' UTR	1700020I14Rik	119594296	119600744	6449	NR_015473
chr2	119585202	119585202	+	3' UTR	1700020I14Rik	119594296	119600744	6449	NR_015473
chr2	119572684	119572684	+	Intron	1700020I14Rik	119594296	119600744	6449	NR_015473
chr2	119604857	119604857	+	Distal Intergenic	1700020I14Rik	119594296	119600744	6449	NR_015473
chr2	119599777	119599777	+	Exon	1700020I14Rik	119594296	119600744	6449	NR_015473
chr2	119600231	119600231	+	Exon	1700020I14Rik	119594296	119600744	6449	NR_015473
chr2	119600335	119600335	+	Exon	1700020I14Rik	119594296	119600744	6449	NR_015473
chr2	119599788	119599788	+	Exon	1700020I14Rik	119594296	119600744	6449	NR_015473
chr2	119603403	119603403	+	Distal Intergenic	1700020I14Rik	119594296	119600744	6449	NR_015473
chr2	119604928	119604928	+	Distal Intergenic	1700020I14Rik	119594296	119600744	6449	NR_015473
chr2	119599781	119599781	+	Exon	1700020I14Rik	119594296	119600744	6449	NR_015473
chr11	83442370	83442370	-	3' UTR	1700020L24Rik	83437694	83441232	3539	NM_025492
chr11	83441917	83441917	-	3' UTR	1700020L24Rik	83437694	83441232	3539	NM_025492
chr10	43525210	43525210	-	3' UTR	1700021F05Rik	43525121	43540994	15874	NM_026411
chr10	43533083	43533083	-	Exon	1700021F05Rik	43525121	43540994	15874	NM_026411
chr10	43511738	43511738	+	Exon	1700021F05Rik	43525121	43540994	15874	NM_026411
chr10	43512112	43512112	+	3' UTR	1700021F05Rik	43525121	43540994	15874	NM_026411
chr10	43532980	43532980	-	Exon	1700021F05Rik	43525121	43540994	15874	NM_026411
chr10	43513560	43513560	+	3' UTR	1700021F05Rik	43525121	43540994	15874	NM_026411
chr10	43511693	43511693	+	Exon	1700021F05Rik	43525121	43540994	15874	NM_026411
chr10	43533047	43533047	-	Exon	1700021F05Rik	43525121	43540994	15874	NM_026411
chr10	43525243	43525243	-	Exon	1700021F05Rik	43525121	43540994	15874	NM_026411
chr10	43532883	43532883	-	Exon	1700021F05Rik	43525121	43540994	15874	NM_026411
chr10	43532951	43532951	-	Exon	1700021F05Rik	43525121	43540994	15874	NM_026411
chr10	43512184	43512184	+	3' UTR	1700021F05Rik	43525121	43540994	15874	NM_026411
chr10	43511714	43511714	+	Exon	1700021F05Rik	43525121	43540994	15874	NM_026411
chr10	43511207	43511207	+	Exon	1700021F05Rik	43525121	43540994	15874	NM_026411
chr10	43513809	43513809	+	3' UTR	1700021F05Rik	43525121	43540994	15874	NM_026411
chr10	43512090	43512090	+	Exon	1700021F05Rik	43525121	43540994	15874	NM_026411
chr10	43532869	43532869	-	Exon	1700021F05Rik	43525121	43540994	15874	NM_026411
chr10	43514224	43514224	+	3' UTR	1700021F05Rik	43525121	43540994	15874	NM_026411
chr10	43510451	43510451	+	Exon	1700021F05Rik	43525121	43540994	15874	NM_026411
chr10	43532900	43532900	-	Exon	1700021F05Rik	43525121	43540994	15874	NM_026411
chr10	43511213	43511213	+	Exon	1700021F05Rik	43525121	43540994	15874	NM_026411
chr16	32843451	32843451	-	Exon	1700021K19Rik	32821702	32868366	46665	NM_001200038
chr16	32843253	32843253	-	Exon	1700021K19Rik	32821702	32868366	46665	NM_001200038
chr4	134426823	134426823	+	3' UTR	1700021N21Rik	134448765	134450171	1407	NR_045800
chr4	42980453	42980453	-	3' UTR	1700022I11Rik	42969946	42974325	4380	NM_026088
chr4	42980412	42980412	-	3' UTR	1700022I11Rik	42969946	42974325	4380	NM_026088
chr4	42980393	42980393	-	3' UTR	1700022I11Rik	42969946	42974325	4380	NM_026088
chr4	42980002	42980002	-	3' UTR	1700022I11Rik	42969946	42974325	4380	NM_026088
chr14	123985623	123985623	-	Intron	1700024B18Rik	123987635	124015684	28050	NR_045479
chr6	39087577	39087577	-	Exon	1700025N23Rik	39063879	39067586	3708	NR_040523
chr2	132530336	132530336	-	3' UTR	1700026D11Rik	132490728	132524057	33330	NR_028286
chr2	132530328	132530328	-	3' UTR	1700026D11Rik	132490728	132524057	33330	NR_028286
chr2	132530656	132530656	-	Exon	1700026D11Rik	132490728	132524057	33330	NR_028286
chr2	132530642	132530642	-	Exon	1700026D11Rik	132490728	132524057	33330	NR_028286
chr2	132530560	132530560	-	Exon	1700026D11Rik	132490728	132524057	33330	NR_028286
chr2	132530535	132530535	-	3' UTR	1700026D11Rik	132490728	132524057	33330	NR_028286
chr2	28688937	28688937	+	3' UTR	1700026L06Rik	28692080	28699651	7572	NM_027283
chr2	28686696	28686696	+	Exon	1700026L06Rik	28692080	28699651	7572	NM_027283
chr2	28690690	28690690	+	3' UTR	1700026L06Rik	28692080	28699651	7572	NM_027283
chr2	28676116	28676116	+	Exon	1700026L06Rik	28692080	28699651	7572	NM_027283
chr2	28689073	28689073	+	3' UTR	1700026L06Rik	28692080	28699651	7572	NM_027283
chr2	28687304	28687304	+	3' UTR	1700026L06Rik	28692080	28699651	7572	NM_027283
chr2	28676183	28676183	+	Exon	1700026L06Rik	28692080	28699651	7572	NM_027283
chr2	28687164	28687164	+	Exon	1700026L06Rik	28692080	28699651	7572	NM_027283
chr2	28687396	28687396	+	3' UTR	1700026L06Rik	28692080	28699651	7572	NM_027283
chr2	28676072	28676072	+	Exon	1700026L06Rik	28692080	28699651	7572	NM_027283
chr2	28687142	28687142	+	Exon	1700026L06Rik	28692080	28699651	7572	NM_027283
chr2	28676510	28676510	+	Exon	1700026L06Rik	28692080	28699651	7572	NM_027283
chr2	28688137	28688137	+	3' UTR	1700026L06Rik	28692080	28699651	7572	NM_027283
chr2	28690052	28690052	+	3' UTR	1700026L06Rik	28692080	28699651	7572	NM_027283
chr2	28687115	28687115	+	Exon	1700026L06Rik	28692080	28699651	7572	NM_027283
chr2	28687069	28687069	+	Exon	1700026L06Rik	28692080	28699651	7572	NM_027283
chr2	28687289	28687289	+	3' UTR	1700026L06Rik	28692080	28699651	7572	NM_027283
chr2	28687453	28687453	+	3' UTR	1700026L06Rik	28692080	28699651	7572	NM_027283
chr2	28687153	28687153	+	Exon	1700026L06Rik	28692080	28699651	7572	NM_027283
chr2	28678928	28678928	+	Intron	1700026L06Rik	28692080	28699651	7572	NM_027283
chr2	28687038	28687038	+	Exon	1700026L06Rik	28692080	28699651	7572	NM_027283
chr2	28676404	28676404	+	Exon	1700026L06Rik	28692080	28699651	7572	NM_027283
chr5	64350067	64350067	+	3' UTR	1700027F09Rik	64454813	64467942	13130	NR_040681
chr5	64350455	64350455	+	3' UTR	1700027F09Rik	64454813	64467942	13130	NR_040681
chr5	64350082	64350082	+	3' UTR	1700027F09Rik	64454813	64467942	13130	NR_040681
chr5	64350770	64350770	+	3' UTR	1700027F09Rik	64454813	64467942	13130	NR_040681
chr5	64350236	64350236	+	3' UTR	1700027F09Rik	64454813	64467942	13130	NR_040681
chr8	13588885	13588885	-	Exon	1700029H14Rik	13550722	13562461	11740	NM_001080781
chr8	13568386	13568386	-	3' UTR	1700029H14Rik	13550722	13562461	11740	NM_001080781
chr8	13576124	13576124	-	Intron	1700029H14Rik	13550722	13562461	11740	NM_001080781
chr8	13576883	13576883	-	Intron	1700029H14Rik	13550722	13562461	11740	NM_001080781
chr8	13568043	13568043	-	3' UTR	1700029H14Rik	13550722	13562461	11740	NM_001080781
chr8	13588907	13588907	-	Exon	1700029H14Rik	13550722	13562461	11740	NM_001080781
chr8	13589018	13589018	-	Exon	1700029H14Rik	13550722	13562461	11740	NM_001080781
chr8	13577423	13577423	-	Exon	1700029H14Rik	13550722	13562461	11740	NM_001080781
chr8	13567557	13567557	-	3' UTR	1700029H14Rik	13550722	13562461	11740	NM_001080781
chr8	13567548	13567548	-	3' UTR	1700029H14Rik	13550722	13562461	11740	NM_001080781
chr8	13567319	13567319	-	3' UTR	1700029H14Rik	13550722	13562461	11740	NM_001080781
chr8	13567831	13567831	-	3' UTR	1700029H14Rik	13550722	13562461	11740	NM_001080781
chr8	13568181	13568181	-	3' UTR	1700029H14Rik	13550722	13562461	11740	NM_001080781
chr8	13597022	13597022	-	Intron	1700029H14Rik	13550722	13562461	11740	NM_001080781
chr2	92381741	92381741	+	Downstream (1-2kb)	1700029I15Rik	92382918	92383603	686	NM_183112
chr2	92381202	92381202	+	3' UTR	1700029I15Rik	92382918	92383603	686	NM_183112
chr15	81994747	81994747	-	3' UTR	1700029P11Rik	81980540	81981563	1024	NM_025503
chr15	81994290	81994290	-	3' UTR	1700029P11Rik	81980540	81981563	1024	NM_025503
chr15	81994666	81994666	-	3' UTR	1700029P11Rik	81980540	81981563	1024	NM_025503
chr15	81994654	81994654	-	3' UTR	1700029P11Rik	81980540	81981563	1024	NM_025503
chr15	81994402	81994402	-	3' UTR	1700029P11Rik	81980540	81981563	1024	NM_025503
chr15	81994299	81994299	-	3' UTR	1700029P11Rik	81980540	81981563	1024	NM_025503
chr15	81992585	81992585	-	3' UTR	1700029P11Rik	81980540	81981563	1024	NM_025503
chr15	81998138	81998138	-	Exon	1700029P11Rik	81980540	81981563	1024	NM_025503
chr15	81994162	81994162	-	3' UTR	1700029P11Rik	81980540	81981563	1024	NM_025503
chr15	81992832	81992832	-	3' UTR	1700029P11Rik	81980540	81981563	1024	NM_025503
chr15	81994599	81994599	-	3' UTR	1700029P11Rik	81980540	81981563	1024	NM_025503
chr15	81994312	81994312	-	3' UTR	1700029P11Rik	81980540	81981563	1024	NM_025503
chr8	116982547	116982547	-	3' UTR	1700030J22Rik	116969599	116978943	9345	NM_027103
chr8	72445135	72445135	+	Exon	1700030K09Rik	72443880	72460541	16662	NM_028170
chr8	72455415	72455415	+	Exon	1700030K09Rik	72443880	72460541	16662	NM_028170
chr8	72444917	72444917	+	Exon	1700030K09Rik	72443880	72460541	16662	NM_028170
chr8	121560082	121560082	-	Exon	1700030M09Rik	121544388	121547652	3265	NR_045903
chr8	121552078	121552078	-	3' UTR	1700030M09Rik	121544388	121547652	3265	NR_045903
chr8	121552245	121552245	-	Exon	1700030M09Rik	121544388	121547652	3265	NR_045903
chr12	52568622	52568622	+	Distal Intergenic	1700031P21Rik	52599984	52602322	2339	NR_045910
chr12	52567387	52567387	+	3' UTR	1700031P21Rik	52599984	52602322	2339	NR_045910
chr12	52567529	52567529	+	3' UTR	1700031P21Rik	52599984	52602322	2339	NR_045910
chr12	52568397	52568397	+	Distal Intergenic	1700031P21Rik	52599984	52602322	2339	NR_045910
chr12	52568393	52568393	+	Distal Intergenic	1700031P21Rik	52599984	52602322	2339	NR_045910
chr12	52567456	52567456	+	3' UTR	1700031P21Rik	52599984	52602322	2339	NR_045910
chr12	52567239	52567239	+	Exon	1700031P21Rik	52599984	52602322	2339	NR_045910
chr12	52567225	52567225	+	Exon	1700031P21Rik	52599984	52602322	2339	NR_045910
chr12	52567884	52567884	+	Distal Intergenic	1700031P21Rik	52599984	52602322	2339	NR_045910
chr12	52567147	52567147	+	Exon	1700031P21Rik	52599984	52602322	2339	NR_045910
chr12	52560043	52560043	+	Exon	1700031P21Rik	52599984	52602322	2339	NR_045910
chr12	52567042	52567042	+	Exon	1700031P21Rik	52599984	52602322	2339	NR_045910
chr12	52567371	52567371	+	3' UTR	1700031P21Rik	52599984	52602322	2339	NR_045910
chr12	52567205	52567205	+	Exon	1700031P21Rik	52599984	52602322	2339	NR_045910
chr12	52567221	52567221	+	Exon	1700031P21Rik	52599984	52602322	2339	NR_045910
chr12	52567207	52567207	+	Exon	1700031P21Rik	52599984	52602322	2339	NR_045910
chr12	52567198	52567198	+	Exon	1700031P21Rik	52599984	52602322	2339	NR_045910
chr11	29544973	29544973	+	Exon	1700034F02Rik	29547950	29578352	30403	NM_001163521
chr11	29546713	29546713	-	Exon	1700034F02Rik	29547950	29578352	30403	NM_001163521
chr11	29546639	29546639	-	Intron	1700034F02Rik	29547950	29578352	30403	NM_001163521
chr11	29538725	29538725	+	Exon	1700034F02Rik	29547950	29578352	30403	NM_001163521
chr1	191909264	191909264	+	Exon	1700034H15Rik	191894072	191907527	13456	NR_030669
chr1	191912583	191912583	+	3' UTR	1700034H15Rik	191894072	191907527	13456	NR_030669
chr1	191909222	191909222	+	Exon	1700034H15Rik	191894072	191907527	13456	NR_030669
chr1	191909079	191909079	+	Exon	1700034H15Rik	191894072	191907527	13456	NR_030669
chr1	191909148	191909148	+	Exon	1700034H15Rik	191894072	191907527	13456	NR_030669
chr1	191909124	191909124	+	Exon	1700034H15Rik	191894072	191907527	13456	NR_030669
chr1	191909043	191909043	+	Exon	1700034H15Rik	191894072	191907527	13456	NR_030669
chr1	191909824	191909824	+	3' UTR	1700034H15Rik	191894072	191907527	13456	NR_030669
chr1	191909734	191909734	+	Exon	1700034H15Rik	191894072	191907527	13456	NR_030669
chr1	191909794	191909794	+	3' UTR	1700034H15Rik	191894072	191907527	13456	NR_030669
chr1	191909037	191909037	+	Exon	1700034H15Rik	191894072	191907527	13456	NR_030669
chr1	191909811	191909811	+	3' UTR	1700034H15Rik	191894072	191907527	13456	NR_030669
chr1	191912659	191912659	+	3' UTR	1700034H15Rik	191894072	191907527	13456	NR_030669
chr1	191909641	191909641	+	Exon	1700034H15Rik	191894072	191907527	13456	NR_030669
chr1	191909730	191909730	+	Exon	1700034H15Rik	191894072	191907527	13456	NR_030669
chr1	191912310	191912310	+	3' UTR	1700034H15Rik	191894072	191907527	13456	NR_030669
chr1	191909403	191909403	+	Exon	1700034H15Rik	191894072	191907527	13456	NR_030669
chr1	191909903	191909903	+	3' UTR	1700034H15Rik	191894072	191907527	13456	NR_030669
chr1	191909780	191909780	+	3' UTR	1700034H15Rik	191894072	191907527	13456	NR_030669
chr1	191909675	191909675	+	Exon	1700034H15Rik	191894072	191907527	13456	NR_030669
chr1	191909969	191909969	+	3' UTR	1700034H15Rik	191894072	191907527	13456	NR_030669
chr1	191909290	191909290	+	Exon	1700034H15Rik	191894072	191907527	13456	NR_030669
chr1	191909573	191909573	+	Exon	1700034H15Rik	191894072	191907527	13456	NR_030669
chr6	146978169	146978169	+	Exon	1700034J05Rik	146951301	146954421	3121	NM_001164236
chr6	146990578	146990578	+	Exon	1700034J05Rik	146951301	146954421	3121	NM_001164236
chr1	9746729	9746729	-	Exon	1700034P13Rik	9747648	9771256	23609	NR_040462
chr1	9745629	9745629	-	Exon	1700034P13Rik	9747648	9771256	23609	NR_040462
chr1	9724674	9724674	-	Exon	1700034P13Rik	9747648	9771256	23609	NR_040462
chr1	9746892	9746892	-	Exon	1700034P13Rik	9747648	9771256	23609	NR_040462
chr1	9746017	9746017	-	Exon	1700034P13Rik	9747648	9771256	23609	NR_040462
chr1	9746026	9746026	-	Exon	1700034P13Rik	9747648	9771256	23609	NR_040462
chr1	9745808	9745808	-	Exon	1700034P13Rik	9747648	9771256	23609	NR_040462
chr1	9747612	9747612	-	Exon	1700034P13Rik	9747648	9771256	23609	NR_040462
chr1	9724661	9724661	-	Exon	1700034P13Rik	9747648	9771256	23609	NR_040462
chr1	9747384	9747384	-	Exon	1700034P13Rik	9747648	9771256	23609	NR_040462
chr1	9745952	9745952	-	Exon	1700034P13Rik	9747648	9771256	23609	NR_040462
chr1	9746668	9746668	-	Exon	1700034P13Rik	9747648	9771256	23609	NR_040462
chr1	9724652	9724652	-	Exon	1700034P13Rik	9747648	9771256	23609	NR_040462
chr1	9745966	9745966	-	Exon	1700034P13Rik	9747648	9771256	23609	NR_040462
chr1	9724628	9724628	-	Exon	1700034P13Rik	9747648	9771256	23609	NR_040462
chr1	9725274	9725274	-	Exon	1700034P13Rik	9747648	9771256	23609	NR_040462
chr1	9745860	9745860	-	Exon	1700034P13Rik	9747648	9771256	23609	NR_040462
chr1	9747702	9747702	-	Exon	1700034P13Rik	9747648	9771256	23609	NR_040462
chr1	9747815	9747815	-	Exon	1700034P13Rik	9747648	9771256	23609	NR_040462
chr1	9747741	9747741	-	Exon	1700034P13Rik	9747648	9771256	23609	NR_040462
chr1	9745912	9745912	-	Exon	1700034P13Rik	9747648	9771256	23609	NR_040462
chr1	9725048	9725048	-	Exon	1700034P13Rik	9747648	9771256	23609	NR_040462
chr1	9745927	9745927	-	Exon	1700034P13Rik	9747648	9771256	23609	NR_040462
chr1	9747563	9747563	-	Exon	1700034P13Rik	9747648	9771256	23609	NR_040462
chr1	9724631	9724631	-	Exon	1700034P13Rik	9747648	9771256	23609	NR_040462
chr1	9747674	9747674	-	Exon	1700034P13Rik	9747648	9771256	23609	NR_040462
chr1	9746117	9746117	-	Exon	1700034P13Rik	9747648	9771256	23609	NR_040462
chr1	9747692	9747692	-	Exon	1700034P13Rik	9747648	9771256	23609	NR_040462
chr1	9745508	9745508	-	Exon	1700034P13Rik	9747648	9771256	23609	NR_040462
chr1	9746622	9746622	-	Exon	1700034P13Rik	9747648	9771256	23609	NR_040462
chr1	9746072	9746072	-	Exon	1700034P13Rik	9747648	9771256	23609	NR_040462
chr1	9747163	9747163	-	Exon	1700034P13Rik	9747648	9771256	23609	NR_040462
chr1	9724605	9724605	-	Exon	1700034P13Rik	9747648	9771256	23609	NR_040462
chr1	9747357	9747357	-	Exon	1700034P13Rik	9747648	9771256	23609	NR_040462
chr1	9746934	9746934	-	Exon	1700034P13Rik	9747648	9771256	23609	NR_040462
chr1	9746178	9746178	-	Exon	1700034P13Rik	9747648	9771256	23609	NR_040462
chr1	9746772	9746772	-	Exon	1700034P13Rik	9747648	9771256	23609	NR_040462
chr1	9724786	9724786	-	Exon	1700034P13Rik	9747648	9771256	23609	NR_040462
chr1	9746574	9746574	-	Exon	1700034P13Rik	9747648	9771256	23609	NR_040462
chr1	9746429	9746429	-	Exon	1700034P13Rik	9747648	9771256	23609	NR_040462
chr1	9747708	9747708	-	Exon	1700034P13Rik	9747648	9771256	23609	NR_040462
chr1	9746059	9746059	-	Exon	1700034P13Rik	9747648	9771256	23609	NR_040462
chr1	9746197	9746197	-	Exon	1700034P13Rik	9747648	9771256	23609	NR_040462
chr16	3904084	3904084	+	3' UTR	1700037C18Rik	3905798	3908689	2892	NM_028484
chr16	3903842	3903842	+	3' UTR	1700037C18Rik	3905798	3908689	2892	NM_028484
chr16	3902111	3902111	+	3' UTR	1700037C18Rik	3905798	3908689	2892	NM_028484
chr16	3904031	3904031	+	3' UTR	1700037C18Rik	3905798	3908689	2892	NM_028484
chr16	3900766	3900766	+	Exon	1700037C18Rik	3905798	3908689	2892	NM_028484
chr16	3903631	3903631	+	3' UTR	1700037C18Rik	3905798	3908689	2892	NM_028484
chr16	3903953	3903953	+	3' UTR	1700037C18Rik	3905798	3908689	2892	NM_028484
chr16	3903546	3903546	+	3' UTR	1700037C18Rik	3905798	3908689	2892	NM_028484
chr16	3903830	3903830	+	3' UTR	1700037C18Rik	3905798	3908689	2892	NM_028484
chr2	131146698	131146698	-	3' UTR	1700037H04Rik	131146325	131160020	13696	NM_026091
chr2	131146513	131146513	-	3' UTR	1700037H04Rik	131146325	131160020	13696	NM_026091
chr2	131146636	131146636	-	3' UTR	1700037H04Rik	131146325	131160020	13696	NM_026091
chr7	45303387	45303387	-	3' UTR	1700039E15Rik	45282873	45288993	6121	NM_001033176
chr7	45303692	45303692	-	Exon	1700039E15Rik	45282873	45288993	6121	NM_001033176
chr7	45303407	45303407	-	3' UTR	1700039E15Rik	45282873	45288993	6121	NM_001033176
chr7	45303529	45303529	-	3' UTR	1700039E15Rik	45282873	45288993	6121	NM_001033176
chr1	182317062	182317062	-	Exon	1700047M11Rik	182300834	182303289	2456	NR_015458
chr1	182314309	182314309	-	3' UTR	1700047M11Rik	182300834	182303289	2456	NR_015458
chr1	182315631	182315631	-	3' UTR	1700047M11Rik	182300834	182303289	2456	NR_015458
chr1	182317116	182317116	-	Exon	1700047M11Rik	182300834	182303289	2456	NR_015458
chr1	182316809	182316809	-	3' UTR	1700047M11Rik	182300834	182303289	2456	NR_015458
chr1	182316776	182316776	-	3' UTR	1700047M11Rik	182300834	182303289	2456	NR_015458
chr1	182316573	182316573	-	3' UTR	1700047M11Rik	182300834	182303289	2456	NR_015458
chr1	182317172	182317172	-	Exon	1700047M11Rik	182300834	182303289	2456	NR_015458
chr1	182317035	182317035	-	Exon	1700047M11Rik	182300834	182303289	2456	NR_015458
chr1	182316588	182316588	-	3' UTR	1700047M11Rik	182300834	182303289	2456	NR_015458
chr1	182316944	182316944	-	Exon	1700047M11Rik	182300834	182303289	2456	NR_015458
chr1	182316558	182316558	-	3' UTR	1700047M11Rik	182300834	182303289	2456	NR_015458
chr1	182316778	182316778	-	3' UTR	1700047M11Rik	182300834	182303289	2456	NR_015458
chr1	182316712	182316712	-	3' UTR	1700047M11Rik	182300834	182303289	2456	NR_015458
chr1	182314473	182314473	-	3' UTR	1700047M11Rik	182300834	182303289	2456	NR_015458
chr1	182316863	182316863	-	3' UTR	1700047M11Rik	182300834	182303289	2456	NR_015458
chr1	182316486	182316486	-	3' UTR	1700047M11Rik	182300834	182303289	2456	NR_015458
chr1	182316931	182316931	-	Exon	1700047M11Rik	182300834	182303289	2456	NR_015458
chr1	182315849	182315849	-	3' UTR	1700047M11Rik	182300834	182303289	2456	NR_015458
chr1	182313403	182313403	-	3' UTR	1700047M11Rik	182300834	182303289	2456	NR_015458
chr1	182316912	182316912	-	Exon	1700047M11Rik	182300834	182303289	2456	NR_015458
chr1	182316681	182316681	-	3' UTR	1700047M11Rik	182300834	182303289	2456	NR_015458
chr1	182316909	182316909	-	Exon	1700047M11Rik	182300834	182303289	2456	NR_015458
chr1	182315371	182315371	-	3' UTR	1700047M11Rik	182300834	182303289	2456	NR_015458
chr1	182316358	182316358	-	3' UTR	1700047M11Rik	182300834	182303289	2456	NR_015458
chr6	147632441	147632441	+	3' UTR	1700049E15Rik	147690241	147702374	12134	NR_033636
chr6	147631846	147631846	+	3' UTR	1700049E15Rik	147690241	147702374	12134	NR_033636
chr6	147631861	147631861	+	3' UTR	1700049E15Rik	147690241	147702374	12134	NR_033636
chr6	147632460	147632460	+	3' UTR	1700049E15Rik	147690241	147702374	12134	NR_033636
chr6	100573489	100573489	-	Exon	1700049E22Rik	100527400	100533426	6027	NR_040525
chr6	100573570	100573570	-	Exon	1700049E22Rik	100527400	100533426	6027	NR_040525
chr6	100573626	100573626	-	Exon	1700049E22Rik	100527400	100533426	6027	NR_040525
chr6	100573597	100573597	-	Exon	1700049E22Rik	100527400	100533426	6027	NR_040525
chr6	100573213	100573213	-	3' UTR	1700049E22Rik	100527400	100533426	6027	NR_040525
chr6	100573266	100573266	-	Exon	1700049E22Rik	100527400	100533426	6027	NR_040525
chr6	100568504	100568504	-	Distal Intergenic	1700049E22Rik	100527400	100533426	6027	NR_040525
chr6	100573416	100573416	-	Exon	1700049E22Rik	100527400	100533426	6027	NR_040525
chr7	27910562	27910562	-	Exon	1700049G17Rik	27907392	27929430	22039	NM_028538
chr7	27906926	27906926	-	Distal Intergenic	1700049G17Rik	27907392	27929430	22039	NM_028538
chr7	27912107	27912107	-	Exon	1700049G17Rik	27907392	27929430	22039	NM_028538
chr12	80874435	80874435	+	Exon	1700052I22Rik	80923432	80924447	1016	NR_033786
chr12	80879475	80879475	+	3' UTR	1700052I22Rik	80923432	80924447	1016	NR_033786
chr12	80879968	80879968	+	3' UTR	1700052I22Rik	80923432	80924447	1016	NR_033786
chr12	80874379	80874379	+	Exon	1700052I22Rik	80923432	80924447	1016	NR_033786
chr12	80874319	80874319	+	Exon	1700052I22Rik	80923432	80924447	1016	NR_033786
chr12	80877289	80877289	+	3' UTR	1700052I22Rik	80923432	80924447	1016	NR_033786
chr12	80868463	80868463	+	Exon	1700052I22Rik	80923432	80924447	1016	NR_033786
chr12	80877674	80877674	+	3' UTR	1700052I22Rik	80923432	80924447	1016	NR_033786
chr12	80874508	80874508	+	Exon	1700052I22Rik	80923432	80924447	1016	NR_033786
chr12	80880647	80880647	+	3' UTR	1700052I22Rik	80923432	80924447	1016	NR_033786
chr12	80880634	80880634	+	3' UTR	1700052I22Rik	80923432	80924447	1016	NR_033786
chr12	80877705	80877705	+	3' UTR	1700052I22Rik	80923432	80924447	1016	NR_033786
chr12	80879616	80879616	+	3' UTR	1700052I22Rik	80923432	80924447	1016	NR_033786
chr12	80877217	80877217	+	3' UTR	1700052I22Rik	80923432	80924447	1016	NR_033786
chr12	80877698	80877698	+	3' UTR	1700052I22Rik	80923432	80924447	1016	NR_033786
chr12	80878329	80878329	+	3' UTR	1700052I22Rik	80923432	80924447	1016	NR_033786
chr12	80877385	80877385	+	3' UTR	1700052I22Rik	80923432	80924447	1016	NR_033786
chr12	80879871	80879871	+	3' UTR	1700052I22Rik	80923432	80924447	1016	NR_033786
chr12	80874526	80874526	+	Exon	1700052I22Rik	80923432	80924447	1016	NR_033786
chr12	80874532	80874532	+	Exon	1700052I22Rik	80923432	80924447	1016	NR_033786
chr12	80877806	80877806	+	3' UTR	1700052I22Rik	80923432	80924447	1016	NR_033786
chr12	80874332	80874332	+	Exon	1700052I22Rik	80923432	80924447	1016	NR_033786
chr12	80880400	80880400	+	3' UTR	1700052I22Rik	80923432	80924447	1016	NR_033786
chr12	80878168	80878168	+	3' UTR	1700052I22Rik	80923432	80924447	1016	NR_033786
chr12	80878736	80878736	+	3' UTR	1700052I22Rik	80923432	80924447	1016	NR_033786
chr12	80879658	80879658	+	3' UTR	1700052I22Rik	80923432	80924447	1016	NR_033786
chr12	80877609	80877609	+	3' UTR	1700052I22Rik	80923432	80924447	1016	NR_033786
chr12	80877943	80877943	+	3' UTR	1700052I22Rik	80923432	80924447	1016	NR_033786
chr12	80868538	80868538	+	Exon	1700052I22Rik	80923432	80924447	1016	NR_033786
chr12	80874536	80874536	+	Exon	1700052I22Rik	80923432	80924447	1016	NR_033786
chr12	80877103	80877103	+	Exon	1700052I22Rik	80923432	80924447	1016	NR_033786
chr11	105180031	105180031	-	Exon	1700052K11Rik	105179021	105181433	2413	NR_027956
chr11	105180082	105180082	-	Exon	1700052K11Rik	105179021	105181433	2413	NR_027956
chr11	105180862	105180862	-	Exon	1700052K11Rik	105179021	105181433	2413	NR_027956
chr11	105180378	105180378	-	Exon	1700052K11Rik	105179021	105181433	2413	NR_027956
chr11	105180370	105180370	-	Exon	1700052K11Rik	105179021	105181433	2413	NR_027956
chr11	105179861	105179861	-	Exon	1700052K11Rik	105179021	105181433	2413	NR_027956
chr11	105180359	105180359	-	Exon	1700052K11Rik	105179021	105181433	2413	NR_027956
chr10	4454816	4454816	+	3' UTR	1700052N19Rik	4432605	4455140	22536	NM_024261
chr10	4454836	4454836	+	3' UTR	1700052N19Rik	4432605	4455140	22536	NM_024261
chr10	4454114	4454114	+	Exon	1700052N19Rik	4432605	4455140	22536	NM_024261
chr10	4453975	4453975	+	Exon	1700052N19Rik	4432605	4455140	22536	NM_024261
chr10	4454821	4454821	+	3' UTR	1700052N19Rik	4432605	4455140	22536	NM_024261
chr10	4455043	4455043	+	3' UTR	1700052N19Rik	4432605	4455140	22536	NM_024261
chr10	4453684	4453684	+	Exon	1700052N19Rik	4432605	4455140	22536	NM_024261
chr10	4453736	4453736	+	Exon	1700052N19Rik	4432605	4455140	22536	NM_024261
chr6	143833132	143833132	-	3' UTR	1700060C16Rik	143593353	143651288	57936	NR_045732
chr6	143833189	143833189	-	3' UTR	1700060C16Rik	143593353	143651288	57936	NR_045732
chr17	56892735	56892735	-	3' UTR	1700061G19Rik	56875633	56888838	13206	NM_030141
chr17	56894278	56894278	-	3' UTR	1700061G19Rik	56875633	56888838	13206	NM_030141
chr17	56900220	56900220	-	Exon	1700061G19Rik	56875633	56888838	13206	NM_030141
chr17	56899995	56899995	-	Exon	1700061G19Rik	56875633	56888838	13206	NM_030141
chr17	56901118	56901118	-	Intron	1700061G19Rik	56875633	56888838	13206	NM_030141
chr17	56893663	56893663	-	3' UTR	1700061G19Rik	56875633	56888838	13206	NM_030141
chr17	56901202	56901202	-	Intron	1700061G19Rik	56875633	56888838	13206	NM_030141
chr17	56902098	56902098	-	Intron	1700061G19Rik	56875633	56888838	13206	NM_030141
chr17	56893994	56893994	-	3' UTR	1700061G19Rik	56875633	56888838	13206	NM_030141
chr17	56894206	56894206	-	3' UTR	1700061G19Rik	56875633	56888838	13206	NM_030141
chr17	56892981	56892981	-	3' UTR	1700061G19Rik	56875633	56888838	13206	NM_030141
chr17	56899945	56899945	-	Exon	1700061G19Rik	56875633	56888838	13206	NM_030141
chr17	56893844	56893844	-	3' UTR	1700061G19Rik	56875633	56888838	13206	NM_030141
chr17	56893184	56893184	-	3' UTR	1700061G19Rik	56875633	56888838	13206	NM_030141
chr17	56900821	56900821	-	Intron	1700061G19Rik	56875633	56888838	13206	NM_030141
chr17	56893688	56893688	-	3' UTR	1700061G19Rik	56875633	56888838	13206	NM_030141
chr17	56902622	56902622	-	Exon	1700061G19Rik	56875633	56888838	13206	NM_030141
chr17	56893648	56893648	-	3' UTR	1700061G19Rik	56875633	56888838	13206	NM_030141
chr17	56893773	56893773	-	3' UTR	1700061G19Rik	56875633	56888838	13206	NM_030141
chr12	99718965	99718965	-	3' UTR	1700064M15Rik	99626053	99627974	1922	NR_045288
chr9	95865647	95865647	+	Exon	1700065D16Rik	95855418	95857882	2465	NM_001271569
chr9	95865139	95865139	+	Exon	1700065D16Rik	95855418	95857882	2465	NM_001271569
chr9	95865297	95865297	+	Exon	1700065D16Rik	95855418	95857882	2465	NM_001271569
chr9	95871562	95871562	+	Exon	1700065D16Rik	95855418	95857882	2465	NM_001271569
chr9	95865359	95865359	+	Exon	1700065D16Rik	95855418	95857882	2465	NM_001271569
chr1	192845202	192845202	-	3' UTR	1700065J18Rik	192841705	192842739	1035	NR_040468
chr1	192845070	192845070	-	3' UTR	1700065J18Rik	192841705	192842739	1035	NR_040468
chr1	192845801	192845801	-	3' UTR	1700065J18Rik	192841705	192842739	1035	NR_040468
chr1	192845316	192845316	-	3' UTR	1700065J18Rik	192841705	192842739	1035	NR_040468
chr1	192846599	192846599	-	Exon	1700065J18Rik	192841705	192842739	1035	NR_040468
chr1	192846328	192846328	-	3' UTR	1700065J18Rik	192841705	192842739	1035	NR_040468
chr1	192846704	192846704	-	Exon	1700065J18Rik	192841705	192842739	1035	NR_040468
chr1	192845109	192845109	-	3' UTR	1700065J18Rik	192841705	192842739	1035	NR_040468
chr1	192846497	192846497	-	Exon	1700065J18Rik	192841705	192842739	1035	NR_040468
chr1	192846541	192846541	-	Exon	1700065J18Rik	192841705	192842739	1035	NR_040468
chr1	192844907	192844907	-	3' UTR	1700065J18Rik	192841705	192842739	1035	NR_040468
chr1	192845915	192845915	-	3' UTR	1700065J18Rik	192841705	192842739	1035	NR_040468
chr1	192844892	192844892	-	3' UTR	1700065J18Rik	192841705	192842739	1035	NR_040468
chr1	192846464	192846464	-	Exon	1700065J18Rik	192841705	192842739	1035	NR_040468
chr1	192846392	192846392	-	Exon	1700065J18Rik	192841705	192842739	1035	NR_040468
chr1	192844917	192844917	-	3' UTR	1700065J18Rik	192841705	192842739	1035	NR_040468
chr1	192846403	192846403	-	Exon	1700065J18Rik	192841705	192842739	1035	NR_040468
chr1	192846483	192846483	-	Exon	1700065J18Rik	192841705	192842739	1035	NR_040468
chr1	192846638	192846638	-	Exon	1700065J18Rik	192841705	192842739	1035	NR_040468
chr1	192846713	192846713	-	Exon	1700065J18Rik	192841705	192842739	1035	NR_040468
chr1	57388591	57388591	-	Exon	1700066M21Rik	57377620	57385422	7803	NM_028546
chr1	57388488	57388488	-	3' UTR	1700066M21Rik	57377620	57385422	7803	NM_028546
chr8	83999753	83999753	+	Exon	1700067K01Rik	84001706	84004770	3065	NM_183097
chr8	83999974	83999974	+	3' UTR	1700067K01Rik	84001706	84004770	3065	NM_183097
chr8	84000164	84000164	+	3' UTR	1700067K01Rik	84001706	84004770	3065	NM_183097
chr8	84000120	84000120	+	3' UTR	1700067K01Rik	84001706	84004770	3065	NM_183097
chr8	83999970	83999970	+	3' UTR	1700067K01Rik	84001706	84004770	3065	NM_183097
chr8	84000341	84000341	+	3' UTR	1700067K01Rik	84001706	84004770	3065	NM_183097
chr8	84000072	84000072	+	3' UTR	1700067K01Rik	84001706	84004770	3065	NM_183097
chrX	52053434	52053434	-	3' UTR	1700080O16Rik	51968695	51972772	4078	NM_028851
chrX	52053363	52053363	-	3' UTR	1700080O16Rik	51968695	51972772	4078	NM_028851
chrX	52051090	52051090	-	Distal Intergenic	1700080O16Rik	51968695	51972772	4078	NM_028851
chrX	52053382	52053382	-	3' UTR	1700080O16Rik	51968695	51972772	4078	NM_028851
chrX	52053412	52053412	-	3' UTR	1700080O16Rik	51968695	51972772	4078	NM_028851
chrX	52053239	52053239	-	3' UTR	1700080O16Rik	51968695	51972772	4078	NM_028851
chrX	52053334	52053334	-	3' UTR	1700080O16Rik	51968695	51972772	4078	NM_028851
chrX	52053071	52053071	-	3' UTR	1700080O16Rik	51968695	51972772	4078	NM_028851
chrX	52053513	52053513	-	3' UTR	1700080O16Rik	51968695	51972772	4078	NM_028851
chrX	52053657	52053657	-	Exon	1700080O16Rik	51968695	51972772	4078	NM_028851
chrX	52051538	52051538	-	Distal Intergenic	1700080O16Rik	51968695	51972772	4078	NM_028851
chr18	38258337	38258337	+	Exon	1700086O06Rik	38238405	38250565	12161	NR_027904
chr18	38262203	38262203	+	3' UTR	1700086O06Rik	38238405	38250565	12161	NR_027904
chr18	38262169	38262169	+	3' UTR	1700086O06Rik	38238405	38250565	12161	NR_027904
chr18	38262173	38262173	+	3' UTR	1700086O06Rik	38238405	38250565	12161	NR_027904
chr18	38238546	38238546	-	Exon	1700086O06Rik	38238405	38250198	11794	NR_015475
chr18	38262094	38262094	+	3' UTR	1700086O06Rik	38238405	38250565	12161	NR_027904
chr18	38262461	38262461	+	3' UTR	1700086O06Rik	38238405	38250565	12161	NR_027904
chr18	38252889	38252889	+	Exon	1700086O06Rik	38238405	38250565	12161	NR_027904
chr18	38262431	38262431	+	3' UTR	1700086O06Rik	38238405	38250565	12161	NR_027904
chr18	38262439	38262439	+	3' UTR	1700086O06Rik	38238405	38250565	12161	NR_027904
chr15	79133421	79133421	+	3' UTR	1700088E04Rik	79134655	79141251	6597	NM_138581
chr15	79133975	79133975	+	3' UTR	1700088E04Rik	79134655	79141251	6597	NM_138581
chr15	79133485	79133485	+	3' UTR	1700088E04Rik	79134655	79141251	6597	NM_138581
chr15	79133314	79133314	+	3' UTR	1700088E04Rik	79134655	79141251	6597	NM_138581
chr15	79133212	79133212	+	3' UTR	1700088E04Rik	79134655	79141251	6597	NM_138581
chr15	79136105	79136105	+	3' UTR	1700088E04Rik	79134655	79141251	6597	NM_138581
chr15	79134154	79134154	+	3' UTR	1700088E04Rik	79134655	79141251	6597	NM_138581
chr15	79133206	79133206	+	3' UTR	1700088E04Rik	79134655	79141251	6597	NM_138581
chr15	79133585	79133585	+	3' UTR	1700088E04Rik	79134655	79141251	6597	NM_138581
chr15	79135000	79135000	+	3' UTR	1700088E04Rik	79134655	79141251	6597	NM_138581
chr15	79127119	79127119	+	Exon	1700088E04Rik	79134655	79141251	6597	NM_138581
chr15	79135275	79135275	+	3' UTR	1700088E04Rik	79134655	79141251	6597	NM_138581
chr15	79136798	79136798	+	3' UTR	1700088E04Rik	79134655	79141251	6597	NM_138581
chr15	79135635	79135635	+	3' UTR	1700088E04Rik	79134655	79141251	6597	NM_138581
chr15	79135286	79135286	+	3' UTR	1700088E04Rik	79134655	79141251	6597	NM_138581
chr15	79134350	79134350	+	3' UTR	1700088E04Rik	79134655	79141251	6597	NM_138581
chr15	79130736	79130736	+	Exon	1700088E04Rik	79134655	79141251	6597	NM_138581
chr15	79130543	79130543	+	Exon	1700088E04Rik	79134655	79141251	6597	NM_138581
chr15	79127100	79127100	+	Exon	1700088E04Rik	79134655	79141251	6597	NM_138581
chr15	79133121	79133121	+	Exon	1700088E04Rik	79134655	79141251	6597	NM_138581
chr15	79127205	79127205	+	Exon	1700088E04Rik	79134655	79141251	6597	NM_138581
chr15	79125614	79125614	+	Exon	1700088E04Rik	79134655	79141251	6597	NM_138581
chr15	79129878	79129878	+	Exon	1700088E04Rik	79134655	79141251	6597	NM_138581
chr15	79125575	79125575	+	Exon	1700088E04Rik	79134655	79141251	6597	NM_138581
chr15	79125296	79125296	+	Exon	1700088E04Rik	79134655	79141251	6597	NM_138581
chr19	8739912	8739912	+	Exon	1700092M07Rik	8740718	8741225	508	NM_001177347
chr19	8740464	8740464	+	Exon	1700092M07Rik	8740718	8741225	508	NM_001177347
chr3	90061785	90061785	+	Exon	1700094D03Rik	90062796	90068347	5552	NM_028567
chr3	90061802	90061802	+	Exon	1700094D03Rik	90062796	90068347	5552	NM_028567
chr3	90065605	90065605	+	Exon	1700094D03Rik	90062796	90068347	5552	NM_028567
chr3	90065699	90065699	+	3' UTR	1700094D03Rik	90062796	90068347	5552	NM_028567
chr3	90065790	90065790	+	3' UTR	1700094D03Rik	90062796	90068347	5552	NM_028567
chr10	76389423	76389423	-	Exon	1700094J05Rik	76389015	76401507	12493	NR_040580
chr10	76392962	76392962	-	Exon	1700094J05Rik	76389015	76401507	12493	NR_040580
chr10	76375292	76375292	-	Exon	1700094J05Rik	76389015	76401507	12493	NR_040580
chr10	76392636	76392636	-	Exon	1700094J05Rik	76389015	76401507	12493	NR_040580
chr10	76392638	76392638	-	Exon	1700094J05Rik	76389015	76401507	12493	NR_040580
chr10	76411573	76411573	-	Exon	1700094J05Rik	76389015	76401507	12493	NR_040580
chr10	76392800	76392800	-	Exon	1700094J05Rik	76389015	76401507	12493	NR_040580
chr10	76389197	76389197	-	Exon	1700094J05Rik	76389015	76401507	12493	NR_040580
chr10	76392678	76392678	-	Exon	1700094J05Rik	76389015	76401507	12493	NR_040580
chr10	76392571	76392571	-	Exon	1700094J05Rik	76389015	76401507	12493	NR_040580
chr10	76389458	76389458	-	Exon	1700094J05Rik	76389015	76401507	12493	NR_040580
chr10	76374970	76374970	-	Exon	1700094J05Rik	76389015	76401507	12493	NR_040580
chr10	76412042	76412042	-	Exon	1700094J05Rik	76389015	76401507	12493	NR_040580
chr10	76392414	76392414	-	Exon	1700094J05Rik	76389015	76401507	12493	NR_040580
chr10	76388985	76388985	-	Exon	1700094J05Rik	76389015	76401507	12493	NR_040580
chr10	76392456	76392456	-	Exon	1700094J05Rik	76389015	76401507	12493	NR_040580
chr10	76389409	76389409	-	Exon	1700094J05Rik	76389015	76401507	12493	NR_040580
chr10	76412434	76412434	-	Intron	1700094J05Rik	76389015	76401507	12493	NR_040580
chr10	76389069	76389069	-	Exon	1700094J05Rik	76389015	76401507	12493	NR_040580
chr10	76375218	76375218	-	Exon	1700094J05Rik	76389015	76401507	12493	NR_040580
chr10	76392987	76392987	-	Exon	1700094J05Rik	76389015	76401507	12493	NR_040580
chr10	76381284	76381284	-	Exon	1700094J05Rik	76389015	76401507	12493	NR_040580
chr10	76389108	76389108	-	Exon	1700094J05Rik	76389015	76401507	12493	NR_040580
chr10	76389314	76389314	-	Exon	1700094J05Rik	76389015	76401507	12493	NR_040580
chr10	76375256	76375256	-	Exon	1700094J05Rik	76389015	76401507	12493	NR_040580
chr10	76389521	76389521	-	Exon	1700094J05Rik	76389015	76401507	12493	NR_040580
chr10	76374737	76374737	-	Intron	1700094J05Rik	76389015	76401507	12493	NR_040580
chr10	76374803	76374803	-	Intron	1700094J05Rik	76389015	76401507	12493	NR_040580
chr10	76389398	76389398	-	Exon	1700094J05Rik	76389015	76401507	12493	NR_040580
chr10	76392437	76392437	-	Exon	1700094J05Rik	76389015	76401507	12493	NR_040580
chr10	76369613	76369613	-	Intron	1700094J05Rik	76389015	76401507	12493	NR_040580
chr10	76374926	76374926	-	Exon	1700094J05Rik	76389015	76401507	12493	NR_040580
chr10	76389126	76389126	-	Exon	1700094J05Rik	76389015	76401507	12493	NR_040580
chr10	76392513	76392513	-	Exon	1700094J05Rik	76389015	76401507	12493	NR_040580
chr10	76375015	76375015	-	Exon	1700094J05Rik	76389015	76401507	12493	NR_040580
chr10	76388997	76388997	-	Exon	1700094J05Rik	76389015	76401507	12493	NR_040580
chr10	76367440	76367440	-	Exon	1700094J05Rik	76389015	76401507	12493	NR_040580
chr10	76382089	76382089	-	Exon	1700094J05Rik	76389015	76401507	12493	NR_040580
chr10	76367923	76367923	-	Intron	1700094J05Rik	76389015	76401507	12493	NR_040580
chr10	76367346	76367346	-	Exon	1700094J05Rik	76389015	76401507	12493	NR_040580
chr10	76374537	76374537	-	Intron	1700094J05Rik	76389015	76401507	12493	NR_040580
chr6	52546867	52546867	-	3' UTR	1700094M24Rik	52492451	52500085	7635	NR_046049
chr6	52546950	52546950	-	Exon	1700094M24Rik	52492451	52500085	7635	NR_046049
chr5	25530461	25530461	+	Exon	1700096K18Rik	25530018	25531466	1449	NR_027388
chr5	25530573	25530573	+	Exon	1700096K18Rik	25530018	25531466	1449	NR_027388
chr5	25530566	25530566	+	Exon	1700096K18Rik	25530018	25531466	1449	NR_027388
chr13	70601182	70601182	-	Exon	1700100L14Rik	70573241	70576104	2864	NR_045934
chr13	70603453	70603453	-	Exon	1700100L14Rik	70573241	70576104	2864	NR_045934
chr13	70603363	70603363	-	Exon	1700100L14Rik	70573241	70576104	2864	NR_045934
chr13	70604559	70604559	-	Exon	1700100L14Rik	70573241	70576104	2864	NR_045934
chr13	70604226	70604226	-	Exon	1700100L14Rik	70573241	70576104	2864	NR_045934
chr13	70604271	70604271	-	Exon	1700100L14Rik	70573241	70576104	2864	NR_045934
chr13	70602597	70602597	-	Exon	1700100L14Rik	70573241	70576104	2864	NR_045934
chr13	70589677	70589677	-	Exon	1700100L14Rik	70573241	70576104	2864	NR_045934
chr13	70603215	70603215	-	Exon	1700100L14Rik	70573241	70576104	2864	NR_045934
chr13	70602493	70602493	-	Exon	1700100L14Rik	70573241	70576104	2864	NR_045934
chr13	70604693	70604693	-	Exon	1700100L14Rik	70573241	70576104	2864	NR_045934
chr13	70589334	70589334	-	3' UTR	1700100L14Rik	70573241	70576104	2864	NR_045934
chr13	70589237	70589237	-	3' UTR	1700100L14Rik	70573241	70576104	2864	NR_045934
chr13	70604663	70604663	-	Exon	1700100L14Rik	70573241	70576104	2864	NR_045934
chr13	70589577	70589577	-	3' UTR	1700100L14Rik	70573241	70576104	2864	NR_045934
chr13	70603286	70603286	-	Exon	1700100L14Rik	70573241	70576104	2864	NR_045934
chr13	70602911	70602911	-	Exon	1700100L14Rik	70573241	70576104	2864	NR_045934
chr13	70603443	70603443	-	Exon	1700100L14Rik	70573241	70576104	2864	NR_045934
chr13	70603297	70603297	-	Exon	1700100L14Rik	70573241	70576104	2864	NR_045934
chr13	70599171	70599171	-	Exon	1700100L14Rik	70573241	70576104	2864	NR_045934
chr13	70589714	70589714	-	Exon	1700100L14Rik	70573241	70576104	2864	NR_045934
chr13	70605137	70605137	-	Exon	1700100L14Rik	70573241	70576104	2864	NR_045934
chr13	70596221	70596221	-	Exon	1700100L14Rik	70573241	70576104	2864	NR_045934
chr13	70602683	70602683	-	Exon	1700100L14Rik	70573241	70576104	2864	NR_045934
chr13	70603783	70603783	-	Exon	1700100L14Rik	70573241	70576104	2864	NR_045934
chr13	70602643	70602643	-	Exon	1700100L14Rik	70573241	70576104	2864	NR_045934
chr13	70605008	70605008	-	Exon	1700100L14Rik	70573241	70576104	2864	NR_045934
chr13	70603788	70603788	-	Exon	1700100L14Rik	70573241	70576104	2864	NR_045934
chr13	70603728	70603728	-	Exon	1700100L14Rik	70573241	70576104	2864	NR_045934
chr13	70603477	70603477	-	Exon	1700100L14Rik	70573241	70576104	2864	NR_045934
chr13	70603126	70603126	-	Exon	1700100L14Rik	70573241	70576104	2864	NR_045934
chr13	70603104	70603104	-	Exon	1700100L14Rik	70573241	70576104	2864	NR_045934
chr13	70604833	70604833	-	Exon	1700100L14Rik	70573241	70576104	2864	NR_045934
chr13	70603680	70603680	-	Exon	1700100L14Rik	70573241	70576104	2864	NR_045934
chr13	70605210	70605210	-	Exon	1700100L14Rik	70573241	70576104	2864	NR_045934
chr13	70604553	70604553	-	Exon	1700100L14Rik	70573241	70576104	2864	NR_045934
chr13	70603484	70603484	-	Exon	1700100L14Rik	70573241	70576104	2864	NR_045934
chr13	70602527	70602527	-	Exon	1700100L14Rik	70573241	70576104	2864	NR_045934
chr13	70603486	70603486	-	Exon	1700100L14Rik	70573241	70576104	2864	NR_045934
chr6	129541782	129541782	+	3' UTR	1700101I11Rik	129532184	129533284	1101	NR_045270
chr6	129541817	129541817	+	3' UTR	1700101I11Rik	129532184	129533284	1101	NR_045270
chr6	129533363	129533363	+	5' UTR	1700101I11Rik	129532184	129533284	1101	NR_045270
chr6	129541369	129541369	+	3' UTR	1700101I11Rik	129532184	129533284	1101	NR_045270
chr6	129541407	129541407	+	3' UTR	1700101I11Rik	129532184	129533284	1101	NR_045270
chr6	129541228	129541228	+	3' UTR	1700101I11Rik	129532184	129533284	1101	NR_045270
chr6	129541198	129541198	+	3' UTR	1700101I11Rik	129532184	129533284	1101	NR_045270
chr6	129541281	129541281	+	3' UTR	1700101I11Rik	129532184	129533284	1101	NR_045270
chr9	108392189	108392189	+	3' UTR	1700102P08Rik	108392834	108397767	4934	NM_053216
chr9	108391859	108391859	+	3' UTR	1700102P08Rik	108392834	108397767	4934	NM_053216
chr9	108392056	108392056	+	3' UTR	1700102P08Rik	108392834	108397767	4934	NM_053216
chr9	108391827	108391827	+	Exon	1700102P08Rik	108392834	108397767	4934	NM_053216
chr9	108391833	108391833	+	Exon	1700102P08Rik	108392834	108397767	4934	NM_053216
chr9	108391944	108391944	+	3' UTR	1700102P08Rik	108392834	108397767	4934	NM_053216
chr9	108392456	108392456	+	3' UTR	1700102P08Rik	108392834	108397767	4934	NM_053216
chr9	108392215	108392215	+	3' UTR	1700102P08Rik	108392834	108397767	4934	NM_053216
chr9	108392715	108392715	+	Distal Intergenic	1700102P08Rik	108392834	108397767	4934	NM_053216
chr9	108391791	108391791	+	Exon	1700102P08Rik	108392834	108397767	4934	NM_053216
chr9	108388354	108388354	+	Exon	1700102P08Rik	108392834	108397767	4934	NM_053216
chr9	108374291	108374291	+	Exon	1700102P08Rik	108392834	108397767	4934	NM_053216
chr9	108391913	108391913	+	3' UTR	1700102P08Rik	108392834	108397767	4934	NM_053216
chr9	108391982	108391982	+	3' UTR	1700102P08Rik	108392834	108397767	4934	NM_053216
chr9	108384809	108384809	+	Exon	1700102P08Rik	108392834	108397767	4934	NM_053216
chr9	108392486	108392486	+	3' UTR	1700102P08Rik	108392834	108397767	4934	NM_053216
chr19	7373825	7373825	-	Exon	1700105P06Rik	7383003	7383557	555	NR_045703
chr19	7373725	7373725	-	Exon	1700105P06Rik	7383003	7383557	555	NR_045703
chr19	7374667	7374667	-	Exon	1700105P06Rik	7383003	7383557	555	NR_045703
chr19	7374717	7374717	-	Exon	1700105P06Rik	7383003	7383557	555	NR_045703
chr5	3565500	3565500	+	Intron	1700109H08Rik	3571716	3584341	12626	NM_029843
chr5	3569616	3569616	+	3' UTR	1700109H08Rik	3571716	3584341	12626	NM_029843
chr5	3583768	3583768	+	Intron	1700109H08Rik	3571716	3584341	12626	NM_029843
chr5	3558496	3558496	+	Exon	1700109H08Rik	3571716	3584341	12626	NM_029843
chr5	3571174	3571174	+	Distal Intergenic	1700109H08Rik	3571716	3584341	12626	NM_029843
chr5	3581540	3581540	+	Intron	1700109H08Rik	3571716	3584341	12626	NM_029843
chr5	3569693	3569693	+	3' UTR	1700109H08Rik	3571716	3584341	12626	NM_029843
chr15	77082758	77082758	-	3' UTR	1700109K24Rik	77084398	77096314	11917	NR_108037
chr15	77117029	77117029	-	Exon	1700109K24Rik	77084398	77096314	11917	NR_108037
chr15	77084085	77084085	-	3' UTR	1700109K24Rik	77084398	77096314	11917	NR_108037
chr15	77080514	77080514	-	3' UTR	1700109K24Rik	77084398	77096314	11917	NR_108037
chr15	77088822	77088822	-	Intron	1700109K24Rik	77084398	77096314	11917	NR_108037
chr15	77081964	77081964	-	3' UTR	1700109K24Rik	77084398	77096314	11917	NR_108037
chr15	77083693	77083693	-	3' UTR	1700109K24Rik	77084398	77096314	11917	NR_108037
chr15	77108810	77108810	-	Intron	1700109K24Rik	77084398	77096314	11917	NR_108037
chr15	77117038	77117038	-	Exon	1700109K24Rik	77084398	77096314	11917	NR_108037
chr15	77081489	77081489	-	3' UTR	1700109K24Rik	77084398	77096314	11917	NR_108037
chr15	77079793	77079793	-	3' UTR	1700109K24Rik	77084398	77096314	11917	NR_108037
chr15	77081014	77081014	-	3' UTR	1700109K24Rik	77084398	77096314	11917	NR_108037
chr15	77084040	77084040	-	3' UTR	1700109K24Rik	77084398	77096314	11917	NR_108037
chr15	77079315	77079315	-	3' UTR	1700109K24Rik	77084398	77096314	11917	NR_108037
chr3	88168606	88168606	+	Intron	1700113A16Rik	88171560	88177785	6226	NR_045997
chr3	88171449	88171449	+	Downstream (<1kb)	1700113A16Rik	88171560	88177785	6226	NR_045997
chr3	88168942	88168942	+	3' UTR	1700113A16Rik	88171560	88177785	6226	NR_045997
chr3	88168465	88168465	+	Intron	1700113A16Rik	88171560	88177785	6226	NR_045997
chr3	88170665	88170665	+	Downstream (<1kb)	1700113A16Rik	88171560	88177785	6226	NR_045997
chr3	88160369	88160369	+	Intron	1700113A16Rik	88171560	88177785	6226	NR_045997
chr3	88169352	88169352	+	Downstream (2-3kb)	1700113A16Rik	88171560	88177785	6226	NR_045997
chr3	88168632	88168632	+	Exon	1700113A16Rik	88171560	88177785	6226	NR_045997
chr3	88168058	88168058	+	Exon	1700113A16Rik	88171560	88177785	6226	NR_045997
chr3	88167518	88167518	+	Exon	1700113A16Rik	88171560	88177785	6226	NR_045997
chr3	88169926	88169926	+	Downstream (1-2kb)	1700113A16Rik	88171560	88177785	6226	NR_045997
chr3	88168686	88168686	+	3' UTR	1700113A16Rik	88171560	88177785	6226	NR_045997
chr3	88168248	88168248	+	Exon	1700113A16Rik	88171560	88177785	6226	NR_045997
chr3	88171292	88171292	+	Downstream (<1kb)	1700113A16Rik	88171560	88177785	6226	NR_045997
chr3	88170765	88170765	+	Downstream (<1kb)	1700113A16Rik	88171560	88177785	6226	NR_045997
chr3	88169410	88169410	+	Downstream (2-3kb)	1700113A16Rik	88171560	88177785	6226	NR_045997
chr3	88171362	88171362	+	Downstream (<1kb)	1700113A16Rik	88171560	88177785	6226	NR_045997
chr3	88161248	88161248	+	Exon	1700113A16Rik	88171560	88177785	6226	NR_045997
chr3	88169621	88169621	+	Downstream (1-2kb)	1700113A16Rik	88171560	88177785	6226	NR_045997
chr3	88168256	88168256	+	Exon	1700113A16Rik	88171560	88177785	6226	NR_045997
chr3	88169171	88169171	+	Downstream (2-3kb)	1700113A16Rik	88171560	88177785	6226	NR_045997
chr3	88169054	88169054	+	3' UTR	1700113A16Rik	88171560	88177785	6226	NR_045997
chr3	88169105	88169105	+	3' UTR	1700113A16Rik	88171560	88177785	6226	NR_045997
chr7	135172998	135172998	+	3' UTR	1700120G07Rik	135191765	135196002	4238	NR_046050
chr7	135173487	135173487	+	3' UTR	1700120G07Rik	135191765	135196002	4238	NR_046050
chr7	135172815	135172815	+	3' UTR	1700120G07Rik	135191765	135196002	4238	NR_046050
chr7	135172498	135172498	+	Exon	1700120G07Rik	135191765	135196002	4238	NR_046050
chr7	135115328	135115328	+	Exon	1700120G07Rik	135191765	135196002	4238	NR_046050
chr7	135172523	135172523	+	Exon	1700120G07Rik	135191765	135196002	4238	NR_046050
chr7	135115349	135115349	+	Exon	1700120G07Rik	135191765	135196002	4238	NR_046050
chr7	135098801	135098801	+	Exon	1700120G07Rik	135191765	135196002	4238	NR_046050
chr7	135115334	135115334	+	Exon	1700120G07Rik	135191765	135196002	4238	NR_046050
chr7	127608353	127608353	-	3' UTR	1700120K04Rik	127603903	127604445	543	NR_027915
chr7	127608145	127608145	-	3' UTR	1700120K04Rik	127603903	127604445	543	NR_027915
chr7	127602660	127602660	+	3' UTR	1700120K04Rik	127603903	127604445	543	NR_027915
chr7	127602597	127602597	+	Exon	1700120K04Rik	127603903	127604445	543	NR_027915
chr7	127609392	127609392	-	3' UTR	1700120K04Rik	127603903	127604445	543	NR_027915
chr7	127608049	127608049	-	3' UTR	1700120K04Rik	127603903	127604445	543	NR_027915
chr7	127608700	127608700	-	3' UTR	1700120K04Rik	127603903	127604445	543	NR_027915
chr7	127603006	127603006	+	3' UTR	1700120K04Rik	127603903	127604445	543	NR_027915
chr7	127607344	127607344	-	3' UTR	1700120K04Rik	127603903	127604445	543	NR_027915
chr7	127597435	127597435	+	Exon	1700120K04Rik	127603903	127604445	543	NR_027915
chr7	127609377	127609377	-	3' UTR	1700120K04Rik	127603903	127604445	543	NR_027915
chr7	127608760	127608760	-	3' UTR	1700120K04Rik	127603903	127604445	543	NR_027915
chr7	127602667	127602667	+	3' UTR	1700120K04Rik	127603903	127604445	543	NR_027915
chr7	127607676	127607676	-	3' UTR	1700120K04Rik	127603903	127604445	543	NR_027915
chr7	127608773	127608773	-	3' UTR	1700120K04Rik	127603903	127604445	543	NR_027915
chr7	127602776	127602776	+	3' UTR	1700120K04Rik	127603903	127604445	543	NR_027915
chr7	127602651	127602651	+	3' UTR	1700120K04Rik	127603903	127604445	543	NR_027915
chr7	127608406	127608406	-	3' UTR	1700120K04Rik	127603903	127604445	543	NR_027915
chr7	127597218	127597218	+	Exon	1700120K04Rik	127603903	127604445	543	NR_027915
chr7	127603104	127603104	+	3' UTR	1700120K04Rik	127603903	127604445	543	NR_027915
chr7	127608435	127608435	-	3' UTR	1700120K04Rik	127603903	127604445	543	NR_027915
chr7	127603164	127603164	+	3' UTR	1700120K04Rik	127603903	127604445	543	NR_027915
chr7	127609249	127609249	-	3' UTR	1700120K04Rik	127603903	127604445	543	NR_027915
chr7	127603517	127603517	+	3' UTR	1700120K04Rik	127603903	127604445	543	NR_027915
chr7	127608552	127608552	-	3' UTR	1700120K04Rik	127603903	127604445	543	NR_027915
chr7	127608749	127608749	-	3' UTR	1700120K04Rik	127603903	127604445	543	NR_027915
chr7	127608510	127608510	-	3' UTR	1700120K04Rik	127603903	127604445	543	NR_027915
chr7	127602895	127602895	+	3' UTR	1700120K04Rik	127603903	127604445	543	NR_027915
chr7	127602854	127602854	+	3' UTR	1700120K04Rik	127603903	127604445	543	NR_027915
chr7	127608325	127608325	-	3' UTR	1700120K04Rik	127603903	127604445	543	NR_027915
chr7	127596639	127596639	+	Exon	1700120K04Rik	127603903	127604445	543	NR_027915
chr7	127602733	127602733	+	3' UTR	1700120K04Rik	127603903	127604445	543	NR_027915
chr14	54679356	54679356	-	Intron	1700123O20Rik	54686171	54690742	4572	NM_021437
chr14	54685056	54685056	-	Exon	1700123O20Rik	54686171	54690742	4572	NM_021437
chr14	54674821	54674821	-	Intron	1700123O20Rik	54686171	54690742	4572	NM_021437
chr14	54685043	54685043	-	Exon	1700123O20Rik	54686171	54690742	4572	NM_021437
chr14	54678755	54678755	-	Exon	1700123O20Rik	54686171	54690742	4572	NM_021437
chr6	83759967	83759967	+	Downstream (1-2kb)	1700124L16Rik	83761759	83762508	750	NR_105027
chr6	83758556	83758556	+	3' UTR	1700124L16Rik	83761759	83762508	750	NR_105027
chr6	83756913	83756913	+	Exon	1700124L16Rik	83761759	83762508	750	NR_105027
chr6	83758712	83758712	+	3' UTR	1700124L16Rik	83761759	83762508	750	NR_105027
chr6	83760181	83760181	+	Downstream (1-2kb)	1700124L16Rik	83761759	83762508	750	NR_105027
chr6	83756887	83756887	+	Exon	1700124L16Rik	83761759	83762508	750	NR_105027
chr6	83756051	83756051	+	Intron	1700124L16Rik	83761759	83762508	750	NR_105027
chr6	83758347	83758347	+	Exon	1700124L16Rik	83761759	83762508	750	NR_105027
chr6	83758736	83758736	+	3' UTR	1700124L16Rik	83761759	83762508	750	NR_105027
chr6	83758435	83758435	+	Exon	1700124L16Rik	83761759	83762508	750	NR_105027
chr8	68385090	68385090	-	Intron	1700125H03Rik	68368459	68372293	3835	NR_038189
chr8	68357069	68357069	-	3' UTR	1700125H03Rik	68368459	68372293	3835	NR_038189
chr8	68357488	68357488	-	3' UTR	1700125H03Rik	68368459	68372293	3835	NR_038189
chr8	68356847	68356847	-	3' UTR	1700125H03Rik	68368459	68372293	3835	NR_038189
chr8	68356959	68356959	-	3' UTR	1700125H03Rik	68368459	68372293	3835	NR_038189
chr8	68443530	68443530	-	Intron	1700125H03Rik	68368459	68372293	3835	NR_038189
chr8	68346800	68346800	+	3' UTR	1700125H03Rik	68368459	68372293	3835	NR_038189
chr8	68357145	68357145	-	3' UTR	1700125H03Rik	68368459	68372293	3835	NR_038189
chr8	68357240	68357240	-	3' UTR	1700125H03Rik	68368459	68372293	3835	NR_038189
chr8	68347342	68347342	+	3' UTR	1700125H03Rik	68368459	68372293	3835	NR_038189
chr8	68357461	68357461	-	3' UTR	1700125H03Rik	68368459	68372293	3835	NR_038189
chr8	68357478	68357478	-	3' UTR	1700125H03Rik	68368459	68372293	3835	NR_038189
chr8	68347052	68347052	+	3' UTR	1700125H03Rik	68368459	68372293	3835	NR_038189
chr8	68357132	68357132	-	3' UTR	1700125H03Rik	68368459	68372293	3835	NR_038189
chr8	68358181	68358181	-	3' UTR	1700125H03Rik	68368459	68372293	3835	NR_038189
chr8	68357339	68357339	-	3' UTR	1700125H03Rik	68368459	68372293	3835	NR_038189
chr8	68358622	68358622	-	Exon	1700125H03Rik	68368459	68372293	3835	NR_038189
chr8	68461589	68461589	-	5' UTR	1700125H03Rik	68368459	68372293	3835	NR_038189
chr8	68358429	68358429	-	Exon	1700125H03Rik	68368459	68372293	3835	NR_038189
chr8	68358267	68358267	-	3' UTR	1700125H03Rik	68368459	68372293	3835	NR_038189
chr8	68358121	68358121	-	3' UTR	1700125H03Rik	68368459	68372293	3835	NR_038189
chr8	68347392	68347392	+	3' UTR	1700125H03Rik	68368459	68372293	3835	NR_038189
chr8	68357503	68357503	-	3' UTR	1700125H03Rik	68368459	68372293	3835	NR_038189
chr8	68461303	68461303	-	Exon	1700125H03Rik	68368459	68372293	3835	NR_038189
chr8	68358005	68358005	-	3' UTR	1700125H03Rik	68368459	68372293	3835	NR_038189
chr8	68357436	68357436	-	3' UTR	1700125H03Rik	68368459	68372293	3835	NR_038189
chr8	68346796	68346796	+	3' UTR	1700125H03Rik	68368459	68372293	3835	NR_038189
chr8	68346815	68346815	+	3' UTR	1700125H03Rik	68368459	68372293	3835	NR_038189
chr8	68357377	68357377	-	3' UTR	1700125H03Rik	68368459	68372293	3835	NR_038189
chr8	68329340	68329340	+	Exon	1700125H03Rik	68368459	68372293	3835	NR_038189
chr8	68357459	68357459	-	3' UTR	1700125H03Rik	68368459	68372293	3835	NR_038189
chr8	68358330	68358330	-	3' UTR	1700125H03Rik	68368459	68372293	3835	NR_038189
chr8	68461265	68461265	-	Exon	1700125H03Rik	68368459	68372293	3835	NR_038189
chr8	68461661	68461661	-	5' UTR	1700125H03Rik	68368459	68372293	3835	NR_038189
chr8	68461582	68461582	-	5' UTR	1700125H03Rik	68368459	68372293	3835	NR_038189
chr8	68461172	68461172	-	Exon	1700125H03Rik	68368459	68372293	3835	NR_038189
chr8	68347127	68347127	+	3' UTR	1700125H03Rik	68368459	68372293	3835	NR_038189
chr8	68461408	68461408	-	Exon	1700125H03Rik	68368459	68372293	3835	NR_038189
chr8	68358399	68358399	-	3' UTR	1700125H03Rik	68368459	68372293	3835	NR_038189
chr8	68358187	68358187	-	3' UTR	1700125H03Rik	68368459	68372293	3835	NR_038189
chr8	68357438	68357438	-	3' UTR	1700125H03Rik	68368459	68372293	3835	NR_038189
chr8	68357576	68357576	-	3' UTR	1700125H03Rik	68368459	68372293	3835	NR_038189
chr8	68358571	68358571	-	Exon	1700125H03Rik	68368459	68372293	3835	NR_038189
chr8	68461327	68461327	-	Exon	1700125H03Rik	68368459	68372293	3835	NR_038189
chr8	68358261	68358261	-	3' UTR	1700125H03Rik	68368459	68372293	3835	NR_038189
chr11	85194269	85194269	-	Intron	1700125H20Rik	85171096	85181154	10059	NM_028589
chr11	85190929	85190929	-	Distal Intergenic	1700125H20Rik	85171096	85181154	10059	NM_028589
chr11	85189856	85189856	-	Distal Intergenic	1700125H20Rik	85171096	85181154	10059	NM_028589
chr11	85190802	85190802	-	Distal Intergenic	1700125H20Rik	85171096	85181154	10059	NM_028589
chr11	85190952	85190952	-	Distal Intergenic	1700125H20Rik	85171096	85181154	10059	NM_028589
chr11	85191642	85191642	-	3' UTR	1700125H20Rik	85171096	85181154	10059	NM_028589
chr11	85194249	85194249	-	Intron	1700125H20Rik	85171096	85181154	10059	NM_028589
chr11	85191773	85191773	-	Exon	1700125H20Rik	85171096	85181154	10059	NM_028589
chr11	85191658	85191658	-	Exon	1700125H20Rik	85171096	85181154	10059	NM_028589
chr11	85190664	85190664	-	Distal Intergenic	1700125H20Rik	85171096	85181154	10059	NM_028589
chr11	85191779	85191779	-	Exon	1700125H20Rik	85171096	85181154	10059	NM_028589
chr11	85190391	85190391	-	Distal Intergenic	1700125H20Rik	85171096	85181154	10059	NM_028589
chr11	85190997	85190997	-	Distal Intergenic	1700125H20Rik	85171096	85181154	10059	NM_028589
chr11	85191892	85191892	-	Exon	1700125H20Rik	85171096	85181154	10059	NM_028589
chr11	85188559	85188559	-	Distal Intergenic	1700125H20Rik	85171096	85181154	10059	NM_028589
chr11	85189909	85189909	-	Distal Intergenic	1700125H20Rik	85171096	85181154	10059	NM_028589
chr11	85191596	85191596	-	3' UTR	1700125H20Rik	85171096	85181154	10059	NM_028589
chr11	85189421	85189421	-	Distal Intergenic	1700125H20Rik	85171096	85181154	10059	NM_028589
chr11	85191868	85191868	-	Exon	1700125H20Rik	85171096	85181154	10059	NM_028589
chr11	85189069	85189069	-	Distal Intergenic	1700125H20Rik	85171096	85181154	10059	NM_028589
chr19	8890685	8890685	+	3' UTR	1810009A15Rik	8888883	8890759	1877	NM_025463
chr19	8890437	8890437	+	Exon	1810009A15Rik	8888883	8890759	1877	NM_025463
chr19	8890577	8890577	+	3' UTR	1810009A15Rik	8888883	8890759	1877	NM_025463
chr11	107035581	107035581	-	3' UTR	1810010H24Rik	107028223	107030442	2220	NM_001163473
chr11	107043680	107043680	-	Exon	1810010H24Rik	107028223	107030442	2220	NM_001163473
chr11	107036506	107036506	-	Intron	1810010H24Rik	107028223	107030442	2220	NM_001163473
chr11	107035500	107035500	-	3' UTR	1810010H24Rik	107028223	107030442	2220	NM_001163473
chr11	107073002	107073002	-	Exon	1810010H24Rik	107028223	107030442	2220	NM_001163473
chr11	107073160	107073160	-	Exon	1810010H24Rik	107028223	107030442	2220	NM_001163473
chr11	107074264	107074264	-	Exon	1810010H24Rik	107028223	107030442	2220	NM_001163473
chr11	107047045	107047045	-	Exon	1810010H24Rik	107028223	107030442	2220	NM_001163473
chr11	107072998	107072998	-	Exon	1810010H24Rik	107028223	107030442	2220	NM_001163473
chr11	107072706	107072706	-	Exon	1810010H24Rik	107028223	107030442	2220	NM_001163473
chr11	107054803	107054803	-	Exon	1810010H24Rik	107028223	107030442	2220	NM_001163473
chr11	107047184	107047184	-	Exon	1810010H24Rik	107028223	107030442	2220	NM_001163473
chr11	107036262	107036262	-	Intron	1810010H24Rik	107028223	107030442	2220	NM_001163473
chr11	107074352	107074352	-	Exon	1810010H24Rik	107028223	107030442	2220	NM_001163473
chr11	107054957	107054957	-	Exon	1810010H24Rik	107028223	107030442	2220	NM_001163473
chr11	107034973	107034973	-	3' UTR	1810010H24Rik	107028223	107030442	2220	NM_001163473
chr11	107044640	107044640	-	Intron	1810010H24Rik	107028223	107030442	2220	NM_001163473
chr11	107074801	107074801	-	Exon	1810010H24Rik	107028223	107030442	2220	NM_001163473
chr11	107043238	107043238	-	Intron	1810010H24Rik	107028223	107030442	2220	NM_001163473
chr11	107040362	107040362	-	Exon	1810010H24Rik	107028223	107030442	2220	NM_001163473
chr11	107073152	107073152	-	Exon	1810010H24Rik	107028223	107030442	2220	NM_001163473
chr11	107035814	107035814	-	Exon	1810010H24Rik	107028223	107030442	2220	NM_001163473
chr11	107037220	107037220	-	Intron	1810010H24Rik	107028223	107030442	2220	NM_001163473
chr11	107036550	107036550	-	Intron	1810010H24Rik	107028223	107030442	2220	NM_001163473
chr11	107040080	107040080	-	Intron	1810010H24Rik	107028223	107030442	2220	NM_001163473
chr11	107058747	107058747	-	Exon	1810010H24Rik	107028223	107030442	2220	NM_001163473
chr11	107072929	107072929	-	Exon	1810010H24Rik	107028223	107030442	2220	NM_001163473
chr11	107072966	107072966	-	Exon	1810010H24Rik	107028223	107030442	2220	NM_001163473
chr11	107035225	107035225	-	3' UTR	1810010H24Rik	107028223	107030442	2220	NM_001163473
chr11	107035129	107035129	-	3' UTR	1810010H24Rik	107028223	107030442	2220	NM_001163473
chr11	107074333	107074333	-	Exon	1810010H24Rik	107028223	107030442	2220	NM_001163473
chr11	107073946	107073946	-	Exon	1810010H24Rik	107028223	107030442	2220	NM_001163473
chr11	107055002	107055002	-	Exon	1810010H24Rik	107028223	107030442	2220	NM_001163473
chr11	107042698	107042698	-	Exon	1810010H24Rik	107028223	107030442	2220	NM_001163473
chr11	107074322	107074322	-	Exon	1810010H24Rik	107028223	107030442	2220	NM_001163473
chr11	107035742	107035742	-	3' UTR	1810010H24Rik	107028223	107030442	2220	NM_001163473
chr11	107035801	107035801	-	3' UTR	1810010H24Rik	107028223	107030442	2220	NM_001163473
chr11	107074980	107074980	-	Exon	1810010H24Rik	107028223	107030442	2220	NM_001163473
chr11	107035751	107035751	-	3' UTR	1810010H24Rik	107028223	107030442	2220	NM_001163473
chr11	107054836	107054836	-	Exon	1810010H24Rik	107028223	107030442	2220	NM_001163473
chr11	107043787	107043787	-	Exon	1810010H24Rik	107028223	107030442	2220	NM_001163473
chr11	107035125	107035125	-	3' UTR	1810010H24Rik	107028223	107030442	2220	NM_001163473
chr11	107035338	107035338	-	3' UTR	1810010H24Rik	107028223	107030442	2220	NM_001163473
chr11	107029840	107029840	+	3' UTR	1810010H24Rik	107028223	107030442	2220	NM_001163473
chr11	107074138	107074138	-	Exon	1810010H24Rik	107028223	107030442	2220	NM_001163473
chr11	107074162	107074162	-	Exon	1810010H24Rik	107028223	107030442	2220	NM_001163473
chr11	107035701	107035701	-	3' UTR	1810010H24Rik	107028223	107030442	2220	NM_001163473
chr11	107035706	107035706	-	3' UTR	1810010H24Rik	107028223	107030442	2220	NM_001163473
chr11	107043505	107043505	-	Intron	1810010H24Rik	107028223	107030442	2220	NM_001163473
chr11	107062710	107062710	-	Exon	1810010H24Rik	107028223	107030442	2220	NM_001163473
chr11	107035425	107035425	-	3' UTR	1810010H24Rik	107028223	107030442	2220	NM_001163473
chr11	107039120	107039120	-	Intron	1810010H24Rik	107028223	107030442	2220	NM_001163473
chr11	107035121	107035121	-	3' UTR	1810010H24Rik	107028223	107030442	2220	NM_001163473
chr11	107054870	107054870	-	Exon	1810010H24Rik	107028223	107030442	2220	NM_001163473
chr11	107074084	107074084	-	Exon	1810010H24Rik	107028223	107030442	2220	NM_001163473
chr11	107035387	107035387	-	3' UTR	1810010H24Rik	107028223	107030442	2220	NM_001163473
chr11	107035104	107035104	-	3' UTR	1810010H24Rik	107028223	107030442	2220	NM_001163473
chr11	107035674	107035674	-	3' UTR	1810010H24Rik	107028223	107030442	2220	NM_001163473
chr11	107055085	107055085	-	Exon	1810010H24Rik	107028223	107030442	2220	NM_001163473
chr11	107073548	107073548	-	Exon	1810010H24Rik	107028223	107030442	2220	NM_001163473
chr11	107074579	107074579	-	Exon	1810010H24Rik	107028223	107030442	2220	NM_001163473
chr11	107074838	107074838	-	Exon	1810010H24Rik	107028223	107030442	2220	NM_001163473
chr11	107044636	107044636	-	Intron	1810010H24Rik	107028223	107030442	2220	NM_001163473
chr11	107054818	107054818	-	Exon	1810010H24Rik	107028223	107030442	2220	NM_001163473
chr11	107073380	107073380	-	Exon	1810010H24Rik	107028223	107030442	2220	NM_001163473
chr11	107073786	107073786	-	Exon	1810010H24Rik	107028223	107030442	2220	NM_001163473
chr11	107073288	107073288	-	Exon	1810010H24Rik	107028223	107030442	2220	NM_001163473
chr11	107055038	107055038	-	Exon	1810010H24Rik	107028223	107030442	2220	NM_001163473
chr11	107055890	107055890	-	Exon	1810010H24Rik	107028223	107030442	2220	NM_001163473
chr11	107035417	107035417	-	3' UTR	1810010H24Rik	107028223	107030442	2220	NM_001163473
chr11	107035213	107035213	-	3' UTR	1810010H24Rik	107028223	107030442	2220	NM_001163473
chr11	107074614	107074614	-	Exon	1810010H24Rik	107028223	107030442	2220	NM_001163473
chr11	107073817	107073817	-	Exon	1810010H24Rik	107028223	107030442	2220	NM_001163473
chr11	107055032	107055032	-	Exon	1810010H24Rik	107028223	107030442	2220	NM_001163473
chr11	107054965	107054965	-	Exon	1810010H24Rik	107028223	107030442	2220	NM_001163473
chr11	107073185	107073185	-	Exon	1810010H24Rik	107028223	107030442	2220	NM_001163473
chr11	107056053	107056053	-	Exon	1810010H24Rik	107028223	107030442	2220	NM_001163473
chr11	107077732	107077732	-	Exon	1810010H24Rik	107028223	107030442	2220	NM_001163473
chr11	107074620	107074620	-	Exon	1810010H24Rik	107028223	107030442	2220	NM_001163473
chr11	107066041	107066041	-	Exon	1810010H24Rik	107028223	107030442	2220	NM_001163473
chr11	107073008	107073008	-	Exon	1810010H24Rik	107028223	107030442	2220	NM_001163473
chr8	24438223	24438223	-	3' UTR	1810011O10Rik	24437616	24438946	1331	NM_026931
chr8	24437813	24437813	-	3' UTR	1810011O10Rik	24437616	24438946	1331	NM_026931
chr8	24437936	24437936	-	3' UTR	1810011O10Rik	24437616	24438946	1331	NM_026931
chr8	24438582	24438582	-	Exon	1810011O10Rik	24437616	24438946	1331	NM_026931
chr8	24438539	24438539	-	3' UTR	1810011O10Rik	24437616	24438946	1331	NM_026931
chr8	24438294	24438294	-	3' UTR	1810011O10Rik	24437616	24438946	1331	NM_026931
chr8	24438459	24438459	-	3' UTR	1810011O10Rik	24437616	24438946	1331	NM_026931
chr8	24438279	24438279	-	3' UTR	1810011O10Rik	24437616	24438946	1331	NM_026931
chr8	24438580	24438580	-	Exon	1810011O10Rik	24437616	24438946	1331	NM_026931
chr8	24438464	24438464	-	3' UTR	1810011O10Rik	24437616	24438946	1331	NM_026931
chr8	24438348	24438348	-	3' UTR	1810011O10Rik	24437616	24438946	1331	NM_026931
chr8	24438529	24438529	-	3' UTR	1810011O10Rik	24437616	24438946	1331	NM_026931
chr8	24438902	24438902	-	5' UTR	1810011O10Rik	24437616	24438946	1331	NM_026931
chr8	24438239	24438239	-	3' UTR	1810011O10Rik	24437616	24438946	1331	NM_026931
chr8	24437806	24437806	-	3' UTR	1810011O10Rik	24437616	24438946	1331	NM_026931
chr8	24438431	24438431	-	3' UTR	1810011O10Rik	24437616	24438946	1331	NM_026931
chr8	24438945	24438945	-	5' UTR	1810011O10Rik	24437616	24438946	1331	NM_026931
chr8	24438296	24438296	-	3' UTR	1810011O10Rik	24437616	24438946	1331	NM_026931
chr8	24438573	24438573	-	3' UTR	1810011O10Rik	24437616	24438946	1331	NM_026931
chr8	24438440	24438440	-	3' UTR	1810011O10Rik	24437616	24438946	1331	NM_026931
chr8	24437455	24437455	-	Distal Intergenic	1810011O10Rik	24437616	24438946	1331	NM_026931
chr8	24438329	24438329	-	3' UTR	1810011O10Rik	24437616	24438946	1331	NM_026931
chr8	24438420	24438420	-	3' UTR	1810011O10Rik	24437616	24438946	1331	NM_026931
chr8	24438727	24438727	-	Exon	1810011O10Rik	24437616	24438946	1331	NM_026931
chr8	24438414	24438414	-	3' UTR	1810011O10Rik	24437616	24438946	1331	NM_026931
chr8	24437644	24437644	-	3' UTR	1810011O10Rik	24437616	24438946	1331	NM_026931
chr8	24438606	24438606	-	Exon	1810011O10Rik	24437616	24438946	1331	NM_026931
chr8	24437781	24437781	-	3' UTR	1810011O10Rik	24437616	24438946	1331	NM_026931
chr17	28286352	28286352	+	Exon	1810013A23Rik	28271708	28273163	1456	NR_045427
chr16	8856039	8856039	+	3' UTR	1810013L24Rik	8830100	8858924	28825	NM_001081400
chr16	8855950	8855950	+	Exon	1810013L24Rik	8830100	8858924	28825	NM_001081400
chr16	8841784	8841784	+	Intron	1810013L24Rik	8830100	8858924	28825	NM_001081400
chr16	8830391	8830391	+	5' UTR	1810013L24Rik	8830100	8858924	28825	NM_001081400
chr16	8856920	8856920	+	3' UTR	1810013L24Rik	8830100	8858924	28825	NM_001081400
chr16	8855916	8855916	+	Exon	1810013L24Rik	8830100	8858924	28825	NM_001081400
chr16	8856097	8856097	+	3' UTR	1810013L24Rik	8830100	8858924	28825	NM_001081400
chr16	8845977	8845977	+	Intron	1810013L24Rik	8830100	8858924	28825	NM_001081400
chr16	8856046	8856046	+	3' UTR	1810013L24Rik	8830100	8858924	28825	NM_001081400
chr16	8843166	8843166	+	Exon	1810013L24Rik	8830100	8858924	28825	NM_001081400
chr16	8847280	8847280	+	Intron	1810013L24Rik	8830100	8858924	28825	NM_001081400
chr16	8855914	8855914	+	Exon	1810013L24Rik	8830100	8858924	28825	NM_001081400
chr16	8830653	8830653	+	Exon	1810013L24Rik	8830100	8858924	28825	NM_001081400
chr16	8857300	8857300	+	3' UTR	1810013L24Rik	8830100	8858924	28825	NM_001081400
chr16	8852869	8852869	+	Intron	1810013L24Rik	8830100	8858924	28825	NM_001081400
chr16	8856257	8856257	+	3' UTR	1810013L24Rik	8830100	8858924	28825	NM_001081400
chr16	8843204	8843204	+	Exon	1810013L24Rik	8830100	8858924	28825	NM_001081400
chr16	8855961	8855961	+	Exon	1810013L24Rik	8830100	8858924	28825	NM_001081400
chr16	8856232	8856232	+	3' UTR	1810013L24Rik	8830100	8858924	28825	NM_001081400
chr16	8850917	8850917	+	Intron	1810013L24Rik	8830100	8858924	28825	NM_001081400
chr16	8843146	8843146	+	Exon	1810013L24Rik	8830100	8858924	28825	NM_001081400
chr16	8830860	8830860	+	Intron	1810013L24Rik	8830100	8858924	28825	NM_001081400
chr16	8856004	8856004	+	Exon	1810013L24Rik	8830100	8858924	28825	NM_001081400
chr16	8830297	8830297	+	5' UTR	1810013L24Rik	8830100	8858924	28825	NM_001081400
chr16	8848608	8848608	+	Intron	1810013L24Rik	8830100	8858924	28825	NM_001081400
chr16	8847375	8847375	+	Intron	1810013L24Rik	8830100	8858924	28825	NM_001081400
chr16	8856835	8856835	+	3' UTR	1810013L24Rik	8830100	8858924	28825	NM_001081400
chr16	8856115	8856115	+	3' UTR	1810013L24Rik	8830100	8858924	28825	NM_001081400
chr16	8862051	8862051	+	Distal Intergenic	1810013L24Rik	8830100	8858924	28825	NM_001081400
chr16	8852162	8852162	+	Intron	1810013L24Rik	8830100	8858924	28825	NM_001081400
chr16	8845697	8845697	+	Intron	1810013L24Rik	8830100	8858924	28825	NM_001081400
chr16	8856020	8856020	+	Exon	1810013L24Rik	8830100	8858924	28825	NM_001081400
chr16	8856439	8856439	+	3' UTR	1810013L24Rik	8830100	8858924	28825	NM_001081400
chr16	8857492	8857492	+	3' UTR	1810013L24Rik	8830100	8858924	28825	NM_001081400
chr16	8858012	8858012	+	3' UTR	1810013L24Rik	8830100	8858924	28825	NM_001081400
chr16	8856787	8856787	+	3' UTR	1810013L24Rik	8830100	8858924	28825	NM_001081400
chr16	8857660	8857660	+	3' UTR	1810013L24Rik	8830100	8858924	28825	NM_001081400
chr16	8857558	8857558	+	3' UTR	1810013L24Rik	8830100	8858924	28825	NM_001081400
chr16	8856216	8856216	+	3' UTR	1810013L24Rik	8830100	8858924	28825	NM_001081400
chr16	8856251	8856251	+	3' UTR	1810013L24Rik	8830100	8858924	28825	NM_001081400
chr16	8843069	8843069	+	Exon	1810013L24Rik	8830100	8858924	28825	NM_001081400
chr16	8843951	8843951	+	Intron	1810013L24Rik	8830100	8858924	28825	NM_001081400
chr16	8856197	8856197	+	3' UTR	1810013L24Rik	8830100	8858924	28825	NM_001081400
chr16	8843150	8843150	+	Exon	1810013L24Rik	8830100	8858924	28825	NM_001081400
chr16	8855894	8855894	+	Exon	1810013L24Rik	8830100	8858924	28825	NM_001081400
chr16	8857961	8857961	+	3' UTR	1810013L24Rik	8830100	8858924	28825	NM_001081400
chr16	8843122	8843122	+	Exon	1810013L24Rik	8830100	8858924	28825	NM_001081400
chr16	8847021	8847021	+	Intron	1810013L24Rik	8830100	8858924	28825	NM_001081400
chr16	8858796	8858796	+	3' UTR	1810013L24Rik	8830100	8858924	28825	NM_001081400
chr10	86692210	86692210	-	Exon	1810014B01Rik	86685527	86689954	4428	NR_015572
chr10	86694592	86694592	-	Exon	1810014B01Rik	86685527	86689954	4428	NR_015572
chr10	86691033	86691033	-	3' UTR	1810014B01Rik	86685527	86689954	4428	NR_015572
chr10	86694484	86694484	-	Exon	1810014B01Rik	86685527	86689954	4428	NR_015572
chr10	86693918	86693918	-	Exon	1810014B01Rik	86685527	86689954	4428	NR_015572
chr10	86692909	86692909	-	Intron	1810014B01Rik	86685527	86689954	4428	NR_015572
chr10	86691122	86691122	-	Exon	1810014B01Rik	86685527	86689954	4428	NR_015572
chr10	86692405	86692405	-	Exon	1810014B01Rik	86685527	86689954	4428	NR_015572
chr10	86694498	86694498	-	Exon	1810014B01Rik	86685527	86689954	4428	NR_015572
chr10	86694526	86694526	-	Exon	1810014B01Rik	86685527	86689954	4428	NR_015572
chr10	86692277	86692277	-	Exon	1810014B01Rik	86685527	86689954	4428	NR_015572
chr10	86692442	86692442	-	Exon	1810014B01Rik	86685527	86689954	4428	NR_015572
chr8	106127693	106127693	-	Intron	1810019D21Rik	106135400	106138722	3323	NR_040344
chr8	106129042	106129042	+	3' UTR	1810019D21Rik	106135400	106138722	3323	NR_040344
chr8	106108949	106108949	+	Exon	1810019D21Rik	106135400	106138722	3323	NR_040344
chr8	106108939	106108939	+	Exon	1810019D21Rik	106135400	106138722	3323	NR_040344
chr8	106109088	106109088	+	Exon	1810019D21Rik	106135400	106138722	3323	NR_040344
chr8	106131708	106131708	-	Exon	1810019D21Rik	106135400	106138722	3323	NR_040344
chr8	106128057	106128057	+	3' UTR	1810019D21Rik	106135400	106138722	3323	NR_040344
chr8	106127944	106127944	-	Exon	1810019D21Rik	106135400	106138722	3323	NR_040344
chr8	106130481	106130481	-	3' UTR	1810019D21Rik	106135400	106138722	3323	NR_040344
chr8	106108607	106108607	+	Exon	1810019D21Rik	106135400	106138722	3323	NR_040344
chr8	106127939	106127939	+	Exon	1810019D21Rik	106135400	106138722	3323	NR_040344
chr8	106128022	106128022	+	Exon	1810019D21Rik	106135400	106138722	3323	NR_040344
chr8	106129272	106129272	-	3' UTR	1810019D21Rik	106135400	106138722	3323	NR_040344
chr8	106130498	106130498	-	3' UTR	1810019D21Rik	106135400	106138722	3323	NR_040344
chr8	106130678	106130678	-	Downstream (<1kb)	1810019D21Rik	106135400	106138722	3323	NR_040344
chr8	106108630	106108630	+	Exon	1810019D21Rik	106135400	106138722	3323	NR_040344
chr8	106130066	106130066	+	3' UTR	1810019D21Rik	106135400	106138722	3323	NR_040344
chr8	106129410	106129410	-	3' UTR	1810019D21Rik	106135400	106138722	3323	NR_040344
chr8	106108445	106108445	+	Exon	1810019D21Rik	106135400	106138722	3323	NR_040344
chr8	106132186	106132186	-	Exon	1810019D21Rik	106135400	106138722	3323	NR_040344
chr8	106108697	106108697	+	Exon	1810019D21Rik	106135400	106138722	3323	NR_040344
chr8	106132511	106132511	-	Exon	1810019D21Rik	106135400	106138722	3323	NR_040344
chr8	106132836	106132836	-	Exon	1810019D21Rik	106135400	106138722	3323	NR_040344
chr8	106129170	106129170	-	3' UTR	1810019D21Rik	106135400	106138722	3323	NR_040344
chr8	106129217	106129217	+	3' UTR	1810019D21Rik	106135400	106138722	3323	NR_040344
chr8	106109068	106109068	+	Exon	1810019D21Rik	106135400	106138722	3323	NR_040344
chr8	106130712	106130712	-	Downstream (<1kb)	1810019D21Rik	106135400	106138722	3323	NR_040344
chr8	106130734	106130734	-	Downstream (<1kb)	1810019D21Rik	106135400	106138722	3323	NR_040344
chr8	106129549	106129549	-	3' UTR	1810019D21Rik	106135400	106138722	3323	NR_040344
chr8	106108612	106108612	+	Exon	1810019D21Rik	106135400	106138722	3323	NR_040344
chr8	106134299	106134299	-	Exon	1810019D21Rik	106135400	106138722	3323	NR_040344
chr8	106128846	106128846	-	3' UTR	1810019D21Rik	106135400	106138722	3323	NR_040344
chr8	106130139	106130139	-	3' UTR	1810019D21Rik	106135400	106138722	3323	NR_040344
chr8	106131043	106131043	-	Downstream (<1kb)	1810019D21Rik	106135400	106138722	3323	NR_040344
chr8	106131092	106131092	-	Downstream (<1kb)	1810019D21Rik	106135400	106138722	3323	NR_040344
chr8	106130186	106130186	+	3' UTR	1810019D21Rik	106135400	106138722	3323	NR_040344
chr8	106131126	106131126	-	Downstream (<1kb)	1810019D21Rik	106135400	106138722	3323	NR_040344
chr8	106108898	106108898	+	Exon	1810019D21Rik	106135400	106138722	3323	NR_040344
chr8	106131451	106131451	-	3' UTR	1810019D21Rik	106135400	106138722	3323	NR_040344
chr8	106131485	106131485	-	3' UTR	1810019D21Rik	106135400	106138722	3323	NR_040344
chr8	106128000	106128000	-	Exon	1810019D21Rik	106135400	106138722	3323	NR_040344
chr8	106128054	106128054	+	3' UTR	1810019D21Rik	106135400	106138722	3323	NR_040344
chr8	106127739	106127739	-	Intron	1810019D21Rik	106135400	106138722	3323	NR_040344
chr8	106130775	106130775	-	Downstream (<1kb)	1810019D21Rik	106135400	106138722	3323	NR_040344
chr8	106127845	106127845	-	Intron	1810019D21Rik	106135400	106138722	3323	NR_040344
chr8	106127813	106127813	-	Intron	1810019D21Rik	106135400	106138722	3323	NR_040344
chr8	106128692	106128692	-	3' UTR	1810019D21Rik	106135400	106138722	3323	NR_040344
chr8	106132282	106132282	-	Exon	1810019D21Rik	106135400	106138722	3323	NR_040344
chr8	106128936	106128936	+	3' UTR	1810019D21Rik	106135400	106138722	3323	NR_040344
chr8	106130209	106130209	+	3' UTR	1810019D21Rik	106135400	106138722	3323	NR_040344
chr8	106133073	106133073	-	Exon	1810019D21Rik	106135400	106138722	3323	NR_040344
chr8	106099091	106099091	+	Exon	1810019D21Rik	106135400	106138722	3323	NR_040344
chr8	106133595	106133595	-	Exon	1810019D21Rik	106135400	106138722	3323	NR_040344
chr8	106133600	106133600	-	Exon	1810019D21Rik	106135400	106138722	3323	NR_040344
chr8	106133606	106133606	-	Exon	1810019D21Rik	106135400	106138722	3323	NR_040344
chr8	106133975	106133975	-	Exon	1810019D21Rik	106135400	106138722	3323	NR_040344
chr8	106129489	106129489	+	3' UTR	1810019D21Rik	106135400	106138722	3323	NR_040344
chr8	106130120	106130120	+	3' UTR	1810019D21Rik	106135400	106138722	3323	NR_040344
chr8	106128436	106128436	+	3' UTR	1810019D21Rik	106135400	106138722	3323	NR_040344
chr8	106108646	106108646	+	Exon	1810019D21Rik	106135400	106138722	3323	NR_040344
chr8	106108693	106108693	+	Exon	1810019D21Rik	106135400	106138722	3323	NR_040344
chr8	106108730	106108730	+	Exon	1810019D21Rik	106135400	106138722	3323	NR_040344
chr8	106131810	106131810	-	Exon	1810019D21Rik	106135400	106138722	3323	NR_040344
chr8	106131201	106131201	-	3' UTR	1810019D21Rik	106135400	106138722	3323	NR_040344
chr8	106127986	106127986	+	Exon	1810019D21Rik	106135400	106138722	3323	NR_040344
chr8	106127984	106127984	+	Exon	1810019D21Rik	106135400	106138722	3323	NR_040344
chr8	106133185	106133185	-	Exon	1810019D21Rik	106135400	106138722	3323	NR_040344
chr8	106130710	106130710	-	Downstream (<1kb)	1810019D21Rik	106135400	106138722	3323	NR_040344
chr8	106108223	106108223	+	Exon	1810019D21Rik	106135400	106138722	3323	NR_040344
chr8	106108152	106108152	+	Exon	1810019D21Rik	106135400	106138722	3323	NR_040344
chr8	106134276	106134276	-	Exon	1810019D21Rik	106135400	106138722	3323	NR_040344
chr8	106129992	106129992	-	3' UTR	1810019D21Rik	106135400	106138722	3323	NR_040344
chr8	106132133	106132133	-	Exon	1810019D21Rik	106135400	106138722	3323	NR_040344
chr8	106127770	106127770	-	Intron	1810019D21Rik	106135400	106138722	3323	NR_040344
chr8	106130804	106130804	-	Downstream (<1kb)	1810019D21Rik	106135400	106138722	3323	NR_040344
chr8	106127717	106127717	-	Intron	1810019D21Rik	106135400	106138722	3323	NR_040344
chr8	106131532	106131532	-	Exon	1810019D21Rik	106135400	106138722	3323	NR_040344
chr8	106132127	106132127	-	Exon	1810019D21Rik	106135400	106138722	3323	NR_040344
chr8	106129019	106129019	-	3' UTR	1810019D21Rik	106135400	106138722	3323	NR_040344
chr8	106128087	106128087	+	3' UTR	1810019D21Rik	106135400	106138722	3323	NR_040344
chr8	106130750	106130750	-	Downstream (<1kb)	1810019D21Rik	106135400	106138722	3323	NR_040344
chr8	106128095	106128095	-	3' UTR	1810019D21Rik	106135400	106138722	3323	NR_040344
chr8	106132143	106132143	-	Exon	1810019D21Rik	106135400	106138722	3323	NR_040344
chr8	106131229	106131229	-	3' UTR	1810019D21Rik	106135400	106138722	3323	NR_040344
chr8	106104139	106104139	+	Exon	1810019D21Rik	106135400	106138722	3323	NR_040344
chr8	106130760	106130760	-	Downstream (<1kb)	1810019D21Rik	106135400	106138722	3323	NR_040344
chr8	106134706	106134706	-	Exon	1810019D21Rik	106135400	106138722	3323	NR_040344
chr8	106131710	106131710	-	Exon	1810019D21Rik	106135400	106138722	3323	NR_040344
chr8	106128061	106128061	+	3' UTR	1810019D21Rik	106135400	106138722	3323	NR_040344
chr15	89075663	89075663	-	Exon	1810021B22Rik	89071198	89075854	4657	NR_040417
chr3	14606344	14606344	-	3' UTR	1810022K09Rik	14606289	14611256	4968	NM_001099674
chr3	14606364	14606364	-	Exon	1810022K09Rik	14606289	14611256	4968	NM_001099674
chr3	14606520	14606520	-	Intron	1810022K09Rik	14606289	14611256	4968	NM_001099674
chr7	73558395	73558395	-	Exon	1810026B05Rik	73539798	73558395	18598	NR_037569
chr9	21588565	21588565	+	3' UTR	1810026J23Rik	21592722	21595970	3249	NM_178619
chr9	21587312	21587312	+	Exon	1810026J23Rik	21592722	21595970	3249	NM_178619
chr9	21587332	21587332	+	Exon	1810026J23Rik	21592722	21595970	3249	NM_178619
chr9	21588175	21588175	+	Exon	1810026J23Rik	21592722	21595970	3249	NM_178619
chr9	21588924	21588924	+	3' UTR	1810026J23Rik	21592722	21595970	3249	NM_178619
chr9	21591995	21591995	+	Intron	1810026J23Rik	21592722	21595970	3249	NM_178619
chr9	21588736	21588736	+	3' UTR	1810026J23Rik	21592722	21595970	3249	NM_178619
chr9	21588333	21588333	+	3' UTR	1810026J23Rik	21592722	21595970	3249	NM_178619
chr9	21588480	21588480	+	3' UTR	1810026J23Rik	21592722	21595970	3249	NM_178619
chr9	21583042	21583042	+	Exon	1810026J23Rik	21592722	21595970	3249	NM_178619
chr9	21592488	21592488	+	Intron	1810026J23Rik	21592722	21595970	3249	NM_178619
chr9	21586168	21586168	+	Exon	1810026J23Rik	21592722	21595970	3249	NM_178619
chr9	21589890	21589890	+	Exon	1810026J23Rik	21592722	21595970	3249	NM_178619
chr9	21592647	21592647	+	5' UTR	1810026J23Rik	21592722	21595970	3249	NM_178619
chr9	21592629	21592629	+	5' UTR	1810026J23Rik	21592722	21595970	3249	NM_178619
chr9	21588636	21588636	+	3' UTR	1810026J23Rik	21592722	21595970	3249	NM_178619
chr9	21590659	21590659	+	Intron	1810026J23Rik	21592722	21595970	3249	NM_178619
chr9	21588209	21588209	+	3' UTR	1810026J23Rik	21592722	21595970	3249	NM_178619
chr9	21588659	21588659	+	3' UTR	1810026J23Rik	21592722	21595970	3249	NM_178619
chr9	21588220	21588220	+	3' UTR	1810026J23Rik	21592722	21595970	3249	NM_178619
chr9	21592027	21592027	+	Intron	1810026J23Rik	21592722	21595970	3249	NM_178619
chr9	21588343	21588343	+	3' UTR	1810026J23Rik	21592722	21595970	3249	NM_178619
chr9	21588417	21588417	+	3' UTR	1810026J23Rik	21592722	21595970	3249	NM_178619
chr9	21580454	21580454	+	Exon	1810026J23Rik	21592722	21595970	3249	NM_178619
chr9	21589477	21589477	+	3' UTR	1810026J23Rik	21592722	21595970	3249	NM_178619
chr9	21589365	21589365	-	3' UTR	1810026J23Rik	21592722	21595970	3249	NM_178619
chr9	21588469	21588469	+	3' UTR	1810026J23Rik	21592722	21595970	3249	NM_178619
chr9	21588456	21588456	+	3' UTR	1810026J23Rik	21592722	21595970	3249	NM_178619
chr9	21588114	21588114	+	Exon	1810026J23Rik	21592722	21595970	3249	NM_178619
chr9	21588296	21588296	+	3' UTR	1810026J23Rik	21592722	21595970	3249	NM_178619
chr9	21590027	21590027	+	Exon	1810026J23Rik	21592722	21595970	3249	NM_178619
chr9	21587359	21587359	+	Exon	1810026J23Rik	21592722	21595970	3249	NM_178619
chr9	21591884	21591884	+	Intron	1810026J23Rik	21592722	21595970	3249	NM_178619
chr9	21592390	21592390	+	Intron	1810026J23Rik	21592722	21595970	3249	NM_178619
chr9	21588971	21588971	+	3' UTR	1810026J23Rik	21592722	21595970	3249	NM_178619
chr9	21588327	21588327	+	3' UTR	1810026J23Rik	21592722	21595970	3249	NM_178619
chr9	21589311	21589311	+	3' UTR	1810026J23Rik	21592722	21595970	3249	NM_178619
chr9	21588609	21588609	+	3' UTR	1810026J23Rik	21592722	21595970	3249	NM_178619
chr9	21580394	21580394	+	Exon	1810026J23Rik	21592722	21595970	3249	NM_178619
chr9	21589787	21589787	+	Intron	1810026J23Rik	21592722	21595970	3249	NM_178619
chr9	21591440	21591440	+	Exon	1810026J23Rik	21592722	21595970	3249	NM_178619
chr9	21590365	21590365	+	Exon	1810026J23Rik	21592722	21595970	3249	NM_178619
chr9	21592216	21592216	+	Exon	1810026J23Rik	21592722	21595970	3249	NM_178619
chr9	21589928	21589928	+	Exon	1810026J23Rik	21592722	21595970	3249	NM_178619
chr9	21592274	21592274	+	Intron	1810026J23Rik	21592722	21595970	3249	NM_178619
chrX	12676034	12676034	-	3' UTR	1810030O07Rik	12654884	12673546	18663	NM_175141
chrX	12677423	12677423	-	3' UTR	1810030O07Rik	12654884	12673546	18663	NM_175141
chrX	12703782	12703782	-	Exon	1810030O07Rik	12654884	12673546	18663	NM_175141
chrX	12716984	12716984	-	Exon	1810030O07Rik	12654884	12673546	18663	NM_175141
chrX	12676370	12676370	-	3' UTR	1810030O07Rik	12654884	12673546	18663	NM_175141
chrX	12673570	12673570	-	Distal Intergenic	1810030O07Rik	12654884	12673546	18663	NM_175141
chrX	12693627	12693627	-	Exon	1810030O07Rik	12654884	12673546	18663	NM_175141
chrX	12703404	12703404	-	Exon	1810030O07Rik	12654884	12673546	18663	NM_175141
chrX	12677577	12677577	-	3' UTR	1810030O07Rik	12654884	12673546	18663	NM_175141
chrX	12676221	12676221	-	3' UTR	1810030O07Rik	12654884	12673546	18663	NM_175141
chrX	12706358	12706358	-	Exon	1810030O07Rik	12654884	12673546	18663	NM_175141
chrX	12716929	12716929	-	Exon	1810030O07Rik	12654884	12673546	18663	NM_175141
chrX	12680201	12680201	-	3' UTR	1810030O07Rik	12654884	12673546	18663	NM_175141
chrX	12677478	12677478	-	3' UTR	1810030O07Rik	12654884	12673546	18663	NM_175141
chrX	12677385	12677385	-	3' UTR	1810030O07Rik	12654884	12673546	18663	NM_175141
chrX	12675230	12675230	-	Distal Intergenic	1810030O07Rik	12654884	12673546	18663	NM_175141
chrX	12684341	12684341	-	Exon	1810030O07Rik	12654884	12673546	18663	NM_175141
chrX	12684276	12684276	-	Exon	1810030O07Rik	12654884	12673546	18663	NM_175141
chrX	12677534	12677534	-	3' UTR	1810030O07Rik	12654884	12673546	18663	NM_175141
chrX	12675979	12675979	-	3' UTR	1810030O07Rik	12654884	12673546	18663	NM_175141
chr3	122949409	122949409	-	Exon	1810037I17Rik	122924397	122926194	1798	NM_024461
chr3	122933809	122933809	-	Exon	1810037I17Rik	122924397	122926194	1798	NM_024461
chr3	122949750	122949750	-	Exon	1810037I17Rik	122924397	122926194	1798	NM_024461
chr3	122934280	122934280	-	Exon	1810037I17Rik	122924397	122926194	1798	NM_024461
chr3	122924856	122924856	+	Intron	1810037I17Rik	122924397	122926194	1798	NM_024461
chr3	122933909	122933909	-	Exon	1810037I17Rik	122924397	122926194	1798	NM_024461
chr3	122933686	122933686	-	3' UTR	1810037I17Rik	122924397	122926194	1798	NM_024461
chr3	122934118	122934118	-	Exon	1810037I17Rik	122924397	122926194	1798	NM_024461
chr3	122924820	122924820	+	Intron	1810037I17Rik	122924397	122926194	1798	NM_024461
chr3	122925574	122925574	+	3' UTR	1810037I17Rik	122924397	122926194	1798	NM_024461
chr3	122932030	122932030	-	Distal Intergenic	1810037I17Rik	122924397	122926194	1798	NM_024461
chr3	122933627	122933627	-	3' UTR	1810037I17Rik	122924397	122926194	1798	NM_024461
chr3	122933727	122933727	-	Exon	1810037I17Rik	122924397	122926194	1798	NM_024461
chr3	122925706	122925706	+	3' UTR	1810037I17Rik	122924397	122926194	1798	NM_024461
chr3	122934543	122934543	-	Exon	1810037I17Rik	122924397	122926194	1798	NM_024461
chr3	122933871	122933871	-	Exon	1810037I17Rik	122924397	122926194	1798	NM_024461
chr3	122933586	122933586	-	Distal Intergenic	1810037I17Rik	122924397	122926194	1798	NM_024461
chr3	122933841	122933841	-	Exon	1810037I17Rik	122924397	122926194	1798	NM_024461
chr3	122934342	122934342	-	Exon	1810037I17Rik	122924397	122926194	1798	NM_024461
chr3	122933751	122933751	-	Exon	1810037I17Rik	122924397	122926194	1798	NM_024461
chr10	77988936	77988936	-	Exon	1810043G02Rik	77978650	77985438	6789	NM_026431
chr10	77988120	77988120	-	3' UTR	1810043G02Rik	77978650	77985438	6789	NM_026431
chr10	77988177	77988177	-	3' UTR	1810043G02Rik	77978650	77985438	6789	NM_026431
chr10	77989636	77989636	-	Exon	1810043G02Rik	77978650	77985438	6789	NM_026431
chr10	77988292	77988292	-	Exon	1810043G02Rik	77978650	77985438	6789	NM_026431
chr10	77992443	77992443	-	Exon	1810043G02Rik	77978650	77985438	6789	NM_026431
chr10	77988199	77988199	-	3' UTR	1810043G02Rik	77978650	77985438	6789	NM_026431
chr10	77989627	77989627	-	Exon	1810043G02Rik	77978650	77985438	6789	NM_026431
chr10	77988245	77988245	-	Exon	1810043G02Rik	77978650	77985438	6789	NM_026431
chr10	77988756	77988756	-	Exon	1810043G02Rik	77978650	77985438	6789	NM_026431
chr10	77989649	77989649	-	Exon	1810043G02Rik	77978650	77985438	6789	NM_026431
chr11	120105512	120105512	-	Exon	1810043H04Rik	120098934	120100424	1491	NM_001110242
chr11	120104763	120104763	-	3' UTR	1810043H04Rik	120098934	120100424	1491	NM_001110242
chr11	120104967	120104967	-	3' UTR	1810043H04Rik	120098934	120100424	1491	NM_001110242
chr11	120105593	120105593	-	Exon	1810043H04Rik	120098934	120100424	1491	NM_001110242
chr11	120104899	120104899	-	3' UTR	1810043H04Rik	120098934	120100424	1491	NM_001110242
chr11	120105841	120105841	-	Exon	1810043H04Rik	120098934	120100424	1491	NM_001110242
chr11	120105430	120105430	-	Exon	1810043H04Rik	120098934	120100424	1491	NM_001110242
chr11	120105088	120105088	-	Exon	1810043H04Rik	120098934	120100424	1491	NM_001110242
chr11	120104656	120104656	-	3' UTR	1810043H04Rik	120098934	120100424	1491	NM_001110242
chr11	120105718	120105718	-	Exon	1810043H04Rik	120098934	120100424	1491	NM_001110242
chr11	120105492	120105492	-	Exon	1810043H04Rik	120098934	120100424	1491	NM_001110242
chr11	120104649	120104649	-	3' UTR	1810043H04Rik	120098934	120100424	1491	NM_001110242
chr11	120110455	120110455	-	Exon	1810043H04Rik	120098934	120100424	1491	NM_001110242
chr11	120100291	120100291	+	3' UTR	1810043H04Rik	120098934	120100424	1491	NM_001110242
chr11	120104960	120104960	-	3' UTR	1810043H04Rik	120098934	120100424	1491	NM_001110242
chr11	120105976	120105976	-	Exon	1810043H04Rik	120098934	120100424	1491	NM_001110242
chr11	120105301	120105301	-	Exon	1810043H04Rik	120098934	120100424	1491	NM_001110242
chr11	120104840	120104840	-	3' UTR	1810043H04Rik	120098934	120100424	1491	NM_001110242
chr11	120110173	120110173	-	Exon	1810043H04Rik	120098934	120100424	1491	NM_001110242
chr11	120105288	120105288	-	Exon	1810043H04Rik	120098934	120100424	1491	NM_001110242
chr11	120104859	120104859	-	3' UTR	1810043H04Rik	120098934	120100424	1491	NM_001110242
chr11	120105514	120105514	-	Exon	1810043H04Rik	120098934	120100424	1491	NM_001110242
chr11	120098992	120098992	+	Exon	1810043H04Rik	120098934	120100424	1491	NM_001110242
chr11	120104549	120104549	-	3' UTR	1810043H04Rik	120098934	120100424	1491	NM_001110242
chr11	120104528	120104528	-	3' UTR	1810043H04Rik	120098934	120100424	1491	NM_001110242
chr11	120105027	120105027	-	Exon	1810043H04Rik	120098934	120100424	1491	NM_001110242
chr11	120110945	120110945	-	Exon	1810043H04Rik	120098934	120100424	1491	NM_001110242
chr11	120104625	120104625	-	3' UTR	1810043H04Rik	120098934	120100424	1491	NM_001110242
chr11	120105106	120105106	-	Exon	1810043H04Rik	120098934	120100424	1491	NM_001110242
chr11	120105889	120105889	-	Exon	1810043H04Rik	120098934	120100424	1491	NM_001110242
chr11	120104526	120104526	-	3' UTR	1810043H04Rik	120098934	120100424	1491	NM_001110242
chr19	3714379	3714379	+	Intron	1810055G02Rik	3708333	3717881	9549	NM_028077
chr19	3717648	3717648	+	3' UTR	1810055G02Rik	3708333	3717881	9549	NM_028077
chr19	3716682	3716682	+	Exon	1810055G02Rik	3708333	3717881	9549	NM_028077
chr19	3717553	3717553	+	Exon	1810055G02Rik	3708333	3717881	9549	NM_028077
chr19	3717446	3717446	+	Exon	1810055G02Rik	3708333	3717881	9549	NM_028077
chr19	3716973	3716973	+	Exon	1810055G02Rik	3708333	3717881	9549	NM_028077
chr19	3717089	3717089	+	Exon	1810055G02Rik	3708333	3717881	9549	NM_028077
chr19	3717702	3717702	+	3' UTR	1810055G02Rik	3708333	3717881	9549	NM_028077
chr19	3717276	3717276	+	Exon	1810055G02Rik	3708333	3717881	9549	NM_028077
chr19	3716644	3716644	+	Exon	1810055G02Rik	3708333	3717881	9549	NM_028077
chr19	3717867	3717867	+	3' UTR	1810055G02Rik	3708333	3717881	9549	NM_028077
chr19	3717346	3717346	+	Exon	1810055G02Rik	3708333	3717881	9549	NM_028077
chr6	35261258	35261258	+	Exon	1810058I24Rik	35252732	35262059	9328	NR_027875
chr6	35261447	35261447	+	Exon	1810058I24Rik	35252732	35262059	9328	NR_027875
chr6	35224652	35224652	+	Exon	1810058I24Rik	35252699	35262059	9361	NR_015608
chr6	35261358	35261358	+	Exon	1810058I24Rik	35252732	35262059	9328	NR_027875
chr6	35252739	35252739	+	Exon	1810058I24Rik	35252732	35262059	9328	NR_027875
chr6	35234715	35234715	+	Exon	1810058I24Rik	35252699	35262059	9361	NR_015608
chr6	35261179	35261179	+	Exon	1810058I24Rik	35252732	35262059	9328	NR_027875
chr6	35261578	35261578	+	Exon	1810058I24Rik	35252732	35262059	9328	NR_027875
chr6	35261859	35261859	+	Exon	1810058I24Rik	35252732	35262059	9328	NR_027875
chr6	35261557	35261557	+	Exon	1810058I24Rik	35252732	35262059	9328	NR_027875
chr6	35261473	35261473	+	Exon	1810058I24Rik	35252732	35262059	9328	NR_027875
chr6	35261593	35261593	+	Exon	1810058I24Rik	35252732	35262059	9328	NR_027875
chr6	35260456	35260456	+	Exon	1810058I24Rik	35252732	35262059	9328	NR_027875
chr6	35261770	35261770	+	Exon	1810058I24Rik	35252732	35262059	9328	NR_027875
chr6	35261602	35261602	+	Exon	1810058I24Rik	35252732	35262059	9328	NR_027875
chr6	35261484	35261484	+	Exon	1810058I24Rik	35252732	35262059	9328	NR_027875
chr6	35261597	35261597	+	Exon	1810058I24Rik	35252732	35262059	9328	NR_027875
chr6	35234699	35234699	+	Exon	1810058I24Rik	35252699	35262059	9361	NR_015608
chr14	20528185	20528185	-	Exon	1810062O18Rik	20546293	20570680	24388	NR_033571
chr14	20531706	20531706	-	Exon	1810062O18Rik	20546293	20570680	24388	NR_033571
chr14	20523611	20523611	-	Exon	1810062O18Rik	20546293	20570680	24388	NR_033571
chr14	20523663	20523663	-	Exon	1810062O18Rik	20546293	20570680	24388	NR_033571
chr2	158075203	158075203	+	3' UTR	2010009K17Rik	158070364	158091797	21434	NR_040609
chr2	158075081	158075081	+	3' UTR	2010009K17Rik	158070364	158091797	21434	NR_040609
chr2	158076059	158076059	+	3' UTR	2010009K17Rik	158070364	158091797	21434	NR_040609
chr2	158076730	158076730	+	3' UTR	2010009K17Rik	158070364	158091797	21434	NR_040609
chr2	158075990	158075990	+	3' UTR	2010009K17Rik	158070364	158091797	21434	NR_040609
chr2	158075298	158075298	+	3' UTR	2010009K17Rik	158070364	158091797	21434	NR_040609
chr2	158075264	158075264	+	3' UTR	2010009K17Rik	158070364	158091797	21434	NR_040609
chr2	158076201	158076201	+	3' UTR	2010009K17Rik	158070364	158091797	21434	NR_040609
chr2	158076141	158076141	+	3' UTR	2010009K17Rik	158070364	158091797	21434	NR_040609
chr2	158074974	158074974	+	3' UTR	2010009K17Rik	158070364	158091797	21434	NR_040609
chr18	75286873	75286873	+	3' UTR	2010010A06Rik	75288660	75297317	8658	NR_045394
chr18	75286823	75286823	+	3' UTR	2010010A06Rik	75288660	75297317	8658	NR_045394
chr12	111961441	111961441	-	3' UTR	2010107E04Rik	111961376	111966977	5602	NM_027360
chr12	111961431	111961431	-	3' UTR	2010107E04Rik	111961376	111966977	5602	NM_027360
chr12	111961474	111961474	-	3' UTR	2010107E04Rik	111961376	111966977	5602	NM_027360
chr6	35037176	35037176	-	Intron	2010107G12Rik	34945295	34977999	32705	NM_001025573
chr6	35051287	35051287	-	Exon	2010107G12Rik	34945295	34977999	32705	NM_001025573
chr6	35052955	35052955	-	Exon	2010107G12Rik	34945295	34977999	32705	NM_001025573
chr6	35051532	35051532	-	Exon	2010107G12Rik	34945295	34977999	32705	NM_001025573
chr6	35046300	35046300	-	Exon	2010107G12Rik	34945295	34977999	32705	NM_001025573
chr6	35051536	35051536	-	Exon	2010107G12Rik	34945295	34977999	32705	NM_001025573
chr6	35051423	35051423	-	Exon	2010107G12Rik	34945295	34977999	32705	NM_001025573
chr6	35051154	35051154	-	Exon	2010107G12Rik	34945295	34977999	32705	NM_001025573
chr6	35046204	35046204	-	3' UTR	2010107G12Rik	34945295	34977999	32705	NM_001025573
chr6	35051301	35051301	-	Exon	2010107G12Rik	34945295	34977999	32705	NM_001025573
chr6	35046250	35046250	-	3' UTR	2010107G12Rik	34945295	34977999	32705	NM_001025573
chr6	35051498	35051498	-	Exon	2010107G12Rik	34945295	34977999	32705	NM_001025573
chr6	35046226	35046226	-	3' UTR	2010107G12Rik	34945295	34977999	32705	NM_001025573
chr6	35051115	35051115	-	Exon	2010107G12Rik	34945295	34977999	32705	NM_001025573
chr6	35052930	35052930	-	Exon	2010107G12Rik	34945295	34977999	32705	NM_001025573
chr6	35025834	35025834	-	Intron	2010107G12Rik	34945295	34977999	32705	NM_001025573
chr6	35023141	35023141	-	Exon	2010107G12Rik	34945295	34977999	32705	NM_001025573
chr6	35023402	35023402	-	Exon	2010107G12Rik	34945295	34977999	32705	NM_001025573
chr6	35051160	35051160	-	Exon	2010107G12Rik	34945295	34977999	32705	NM_001025573
chr6	35051089	35051089	-	Exon	2010107G12Rik	34945295	34977999	32705	NM_001025573
chr10	62108811	62108811	-	3' UTR	2010107G23Rik	62107656	62111013	3358	NM_027251
chr10	62108790	62108790	-	3' UTR	2010107G23Rik	62107656	62111013	3358	NM_027251
chr10	62108514	62108514	-	3' UTR	2010107G23Rik	62107656	62111013	3358	NM_027251
chr10	62072231	62072231	+	Distal Intergenic	2010107G23Rik	62107656	62111013	3358	NM_027251
chr13	63259147	63259147	+	Intron	2010111I01Rik	63240029	63302877	62849	NR_110520
chr13	63240301	63240301	+	Exon	2010111I01Rik	63240029	63302877	62849	NR_110520
chr13	63015555	63015555	+	Exon	2010111I01Rik	62964893	63302877	337985	NM_001289924
chr13	63245641	63245641	+	Intron	2010111I01Rik	63240029	63302877	62849	NR_110520
chr13	63244448	63244448	+	Intron	2010111I01Rik	63240029	63302877	62849	NR_110520
chr1	37631332	37631332	-	Exon	2010300C02Rik	37611676	37719811	108136	NM_028096
chr1	37644608	37644608	-	Exon	2010300C02Rik	37611676	37719811	108136	NM_028096
chr1	37631910	37631910	-	Exon	2010300C02Rik	37611676	37719811	108136	NM_028096
chrX	13203607	13203607	+	Distal Intergenic	2010308F09Rik	13234641	13236283	1643	NR_045430
[truncated: 155,642 more rows]
