# Supplementary material for: m6A RNA methylation impacts fate choices during skin morphogenesis
Source: eLife. 2020 Aug 26;9:e56980. doi: 10.7554/eLife.56980 (PMC7535931; doi:10.7554/eLife.56980)
Supplement: Supplementary file 2. — First sheet: Rank of mRNAs based on coding sequence SN-uTPM. Second sheet: GSEA of mRNAs weighted on coding sequence SN-uTPM. The gene sets with p values <0.25 are shown. Third sheet: GSEA of mRNAs with top 20% coding sequence SN-uTPM and top 20% translation efficiency. The gene sets with p values <0.10 are shown. [file elife-56980-supp2.xlsx]

## Sheet: CDS m6A SN-uTPM
Gene ID	CDS m6A SN-uTPM
Pcdha4-g	630.876
Fat2	407.134
Ahnak	393.277
Dst	382.096
Fat1	380.683
Eppk1	321.698
Kmt2d	315.292
Plec	298.562
Zfp292	291.306
Spen	277.046
Zfp518a	276.179
Bc1	271.747
Mga	270.951
Gm608	263.011
Hivep1	261.975
Ranbp6	261.425
Tsix	250.374
Mki67	239.725
Son	235.867
Frem2	234.758
Pkd1	232.96
Nsd1	232.597
Tug1	229.461
Kmt2a	227.715
Cspg4	222.805
Rai1	221.336
Apc	221.07
Macf1	215.709
9930021J03Rik	215.188
Celsr1	213.65
Setd2	209.93
Mir3473f	207.687
Zfp318	206.826
Brca2	205.529
Hivep2	205.268
Zfp646	204.273
Arid1a	204.172
Mbd5	202.425
Exph5	198.212
Bcl9l	196.695
Trappc9	193.81
Ahdc1	188.816
Ubox5	186.452
Arhgap32	183.438
Vcpip1	182.236
Cenpf	181.83
Dido1	181.245
Kmt2c	180.146
Tnrc18	179.499
Mn1	179.434
Zbtb21	178.917
Plag1	178.901
Casp8ap2	178.327
Ash1l	178.093
Pcdh20	177.679
Mars2	175.767
Nrip1	175.75
Arhgap21	174.227
Arhgap5	174.183
Tcf20	173.648
Ankrd11	172.613
Ncoa6	172.041
Chd6	168.525
Kat6a	168.42
Tacc2	167.015
Smcr8	166.902
Setx	166.553
Vcan	165.817
Rfx7	165.634
Asxl1	165.073
Adnp2	164.99
Nynrin	164.114
Wdr81	163.988
Dsp	163.484
Dmxl1	162.578
Bod1l	161.801
Disp1	160.406
BC018507	154.388
D8Ertd82e	154.3
Aspm	154.03
Srrm2	152.821
Pdzd2	152.575
Rnf139	152.064
Fam179b	151.965
Setd1b	150.894
Zfp462	150.703
Tnks1bp1	149.959
Rprd2	149.675
Kat6b	149.663
Ranbp2	149.359
Lats1	148.444
Kif26a	147.53
Arhgap35	147.507
Dse	147.466
Ssh2	145.926
Crebbp	145.893
Msl2	145.832
Zbtb10	145.649
Zfp644	145.494
Slitrk6	144.817
Phf3	144.653
Gli3	143.525
Klhl9	142.645
Zfp407	142.501
Rlf	142.482
Bptf	142.076
Mir8115	140.97
Prr14l	139.211
Tnc	138.815
Tshz1	138.649
Zmym1	137.179
Jrkl	135.954
Chd9	135.941
Tet2	135.172
Tenm2	134.998
N4bp2	134.936
Btd	134.583
Fancm	134.162
Stil	133.563
Prdm2	133.366
Ticrr	133.275
Ep300	133.164
Sgol2	132.952
Celsr2	132.393
Bcl9	132.132
Rreb1	132.069
Fbxo30	131.721
Cep170b	131.485
Prkrir	131.478
Mfhas1	131.361
2610035D17Rik	130.985
Akap11	130.863
Prr12	130.428
2810474O19Rik	130.378
Asxl2	130.36
Ankhd1	130.229
Dsel	129.37
Tnrc6c	129.13
Arid2	129.073
Poc1b	128.5
Tenm4	128.417
Kmt2e	128.152
Fem1c	128.122
Zc3h11a	127.874
Cpne1	127.584
Arid1b	126.28
Zfml	125.037
Rbm15b	124.424
Macrod2	124.242
Znfx1	123.056
Zfp609	123.055
Ylpm1	122.933
Fignl1	122.787
Gltscr1l	122.465
Ankrd17	122.251
Cx3cl1	122.19
Jmjd1c	122.107
Rev3l	121.805
Pus3	121.613
Qser1	121.516
Pcdh18	121.513
Zfp445	121.5
Soga1	121.425
Pcdh7	121.233
Zfp322a	120.597
Zfp628	120.441
Ttc28	120.115
Syne2	119.452
Birc6	119.448
Tanc2	119.045
Helz2	118.714
Zfp800	118.686
Tet3	118.488
Ccdc14	117.544
Btbd7	117.222
Wnk1	116.866
Gltscr1	116.101
Urgcp	115.619
Gli2	115.469
Cdk13	115.018
Klhl28	115.012
Fam208b	114.345
Mast4	114.185
Akap9	113.858
Atad5	113.782
Adnp	113.243
Rif1	113.227
Fpgt	113.137
Zfp281	112.961
Tiparp	112.754
9530082P21Rik	112.695
Adcy9	112.503
Rnf103	112.474
Tnrc6a	111.2
Bahcc1	111.177
Amer1	110.617
Prrc2a	110.579
Abl2	110.303
Arhgef17	110.255
Zc3h6	109.894
Irs1	109.822
Fam83h	109.441
BC005561	109.177
Snd1	109.032
Rsbn1l	108.887
1110037F02Rik	108.576
Kbtbd2	108.355
Kmt2b	107.717
Maml2	107.653
Lphn2	107.54
Ppp1r26	107.057
Epm2aip1	106.802
Zbtb22	106.711
Zfp142	106.558
Tmem168	106.448
Slc26a2	106.427
Bach2	106.381
Med26	106.001
Zfp217	105.388
Irs2	105.328
D5Ertd579e	105.158
Fam83b	104.759
Sh3bp4	104.34
Atmin	104.025
Tnrc6b	103.978
Nhsl1	103.719
1700017B05Rik	103.711
Znrf3	103.557
Shroom3	103.403
Dag1	103.28
Zfp839	103.227
Macrod1	102.294
Lcmt2	102.185
Bcl11a	102.148
Pcx	101.915
Rb1cc1	101.577
AI661453	101.571
Zgrf1	100.836
Bbs12	100.605
4632434I11Rik	100.561
Malat1	100.462
Arhgef5	100.295
Usp34	100.097
Lmtk2	99.8729
Casz1	99.8602
Shroom4	99.7765
Maml3	99.1567
Zbtb18	99.1044
Gemin4	98.7215
5830418K08Rik	98.4842
Tenm3	98.2986
Macc1	98.1669
Zbtb6	98.1228
Mapk7	97.8466
Zfp516	97.7442
Pdzd8	97.6786
Dyrk2	97.4747
Frs2	97.0626
Exoc8	97.0076
Amigo1	96.8267
Alms1	96.7744
Fzd10	96.7196
Sp3	96.4915
Dicer1	96.0955
Plekhg2	95.6476
Map3k10	95.5029
Cln5	95.4568
Zbtb4	95.2732
Tab2	95.1776
Zfp850	95.1636
Rbbp6	95.1568
Setbp1	95.0077
Erbb2ip	95.0018
Sec16a	94.9383
Ghr	94.5684
Cmss1	94.2224
Suco	94.0194
Sp4	94.0146
Zhx1	93.9897
Dnmbp	93.807
Casc5	93.7857
Bcl11b	93.6875
Trip11	93.5733
Usp53	93.5716
Gcc1	93.5191
Topors	93.2971
Gpatch8	93.2535
Zfp451	93.226
Npat	93.1257
Ptch1	92.7115
Zfp871	92.6356
Zcchc2	92.4888
Ercc6l2	92.3633
Tsc22d1	92.1707
Myo9a	92.1645
Mir3098	92.0408
Pvrl3	91.7989
Klhl15	91.5816
Phrf1	91.5734
Lcor	91.5514
Irf2bpl	91.5368
Aim1l	91.4886
Zbtb1	91.4391
Scaf1	91.382
Zc3h12c	91.3083
Camsap2	91.1544
Rest	90.9639
Luzp1	90.921
Mtcl1	90.8036
Cdk12	90.6665
Kansl1	90.2779
Pcnxl4	90.1344
Pcf11	89.7307
Plk4	89.6975
Vps13d	89.5892
Cecr2	89.5706
Ythdf3	89.4921
Urb2	89.1816
Sipa1l2	89.1571
Usp6nl	89.1365
Phlpp2	89.0847
Bnc1	89.0217
Stox2	88.9906
Prrc2c	88.8696
Fam135a	88.8593
Notch1	88.6018
Zbtb39	88.4901
Rbm15	88.0023
Ercc6l	87.841
Tanc1	87.4961
Kif14	87.3872
Lats2	87.2355
Micalcl	87.2212
Sowahc	87.1664
Zfp26	87.0742
Prkg1	86.965
Ntf3	86.8787
Map3k9	86.7935
Fem1b	86.5834
Ythdf1	86.5228
Arhgap11a	86.5101
Lcorl	86.0093
1700052K11Rik	85.8395
Aftph	85.7612
Zfp507	85.642
Zfp865	85.6008
Hivep3	85.5336
Golgb1	85.5245
Pdik1l	85.2341
Ikbip	85.1498
Nr3c1	85.131
Kank1	84.9808
Dusp16	84.9751
Etl4	84.9192
Cep350	84.6893
Megf9	84.6838
Zbtb5	84.5571
Atrx	84.5483
Pdp1	84.5105
Zbtb38	84.4783
Pcnx	84.4016
Zbtb33	84.3918
Bmp2k	84.3208
D7Ertd715e	84.2765
Zc3h4	84.2631
Ston1	84.1829
Brwd1	84.0984
Tti1	84.098
Chd8	84.0214
Sipa1l3	83.9977
Atxn1l	83.9358
Dyrk3	83.8512
Pcnt	83.5289
Kbtbd7	83.1461
Lrp12	83.1292
Ahctf1	83.102
Golga4	83.0212
Zfp280b	82.9704
Champ1	82.8717
Pramef8	82.7634
Chst2	82.6707
Med13l	82.4246
Zfp668	82.3357
Ccdc88c	82.3296
Aim1	82.0691
Atp10d	81.9659
Trappc13	81.9164
Zfhx2	81.8588
Nfat5	81.7671
Fhdc1	81.6419
Mtus1	81.6268
Ppp1r15b	81.6169
Hic2	81.6005
Zfp711	81.2611
Tmem184c	81.2128
Ythdf2	81.1417
A830010M20Rik	81.0929
Plekhg3	80.906
Mlh3	80.6879
Maml1	80.6204
Fdxacb1	80.5283
Zfp106	80.4323
5930430L01Rik	80.2781
Fcgbp	80.1155
Syde2	80.0062
Tnfaip3	79.9633
Pprc1	79.9244
Rgmb	79.8626
Zcchc14	79.8133
Flrt2	79.5256
Lgr4	79.2812
Extl3	79.2228
Elf2	79.1287
Bnc2	78.9714
Rassf10	78.835
Lrp6	78.6827
Zfp553	78.5194
Zswim6	78.5131
Fam171a2	78.3598
Hectd1	78.3258
Zc3h10	78.3182
Zbtb7b	78.2778
Nufip2	77.9183
Ptprf	77.8802
Ccnt1	77.7365
Med13	77.7288
Usp47	77.5956
Brca1	77.5271
Lrrc8d	77.4758
Suv420h1	77.4654
Ptprd	77.3764
Zfp81	77.2581
Prickle1	77.2358
Fam120b	77.1869
Mir3470a	77.1018
Msh6	77.0818
Cobll1	77.0472
Zfp654	76.9498
Zfp608	76.7545
Rassf9	76.7161
Nrde2	76.7158
Herc1	76.6169
2010300C02Rik	76.5532
Ints5	76.4587
Itgae	76.1581
Glce	76.1305
E130308A19Rik	76.1156
Rpp38	76.0153
Akap13	75.9999
Sos2	75.9926
Nod2	75.8778
Bcorl1	75.8206
2410089E03Rik	75.7683
Ror1	75.7518
Zfp639	75.6758
Chsy1	75.6367
Mex3d	75.6008
Raph1	75.5723
Mir6369	75.4812
Ambra1	75.4675
2510039O18Rik	75.4559
Uhrf1bp1l	75.433
Ppl	75.1929
Kansl1l	75.0507
Lrrn1	74.8768
Zbtb49	74.8461
Arid5b	74.8181
Ripk4	74.8055
Tacc1	74.6778
Traf6	74.5154
Peg3	74.4228
Socs6	74.3997
Dapk1	74.2659
Wdr20	74.198
Ube3a	74.1179
Med1	74.0897
Zfp592	73.7747
Mecp2	73.6549
Upf2	73.643
Tlr5	73.6362
Bach1	73.6166
Sh3pxd2a	73.597
Nox4	73.3273
Rnf19a	73.2602
A130010J15Rik	73.2532
Zbtb24	73.2237
Nipbl	73.2142
Fam222b	73.1071
Hoxa1	73.0892
Atf7ip	73.0365
Dclre1c	72.7363
N4bp1	72.6969
Zfp503	72.6764
Ssfa2	72.5295
Lrr1	72.5021
Setd1a	72.4499
Zbtb11	72.3645
Slfn9	72.2896
Nfatc3	72.1714
Cep250	72.1445
Phldb2	71.9692
Irf2bp2	71.934
Tshz3	71.8379
Mbtps2	71.788
Socs5	71.7294
D630045J12Rik	71.7082
Foxo3	71.541
Heca	71.5293
Marveld2	71.5283
Mkks	71.5153
Ino80d	71.4206
Clhc1	71.235
Wdr5b	71.225
Manea	71.2177
Cep97	71.146
Zfp53	71.1265
Nckap5	70.9925
Bmp2	70.8108
Mex3c	70.8047
Fzd6	70.6142
Slc39a10	70.4719
Jmy	70.4161
Elmsan1	70.4042
Cep192	70.3937
Setd5	70.3923
Zfp316	70.3716
AI464131	70.2774
Dopey1	70.2721
Ppp2r3a	70.1759
Rsbn1	70.1448
Ep400	70.1289
Usp10	69.9189
Traf3ip2	69.7574
Dcaf5	69.5436
Pogz	69.5369
Ap5b1	69.4381
Rsf1	69.3735
Ubn2	69.308
Ahr	69.1391
Gen1	68.9943
Auts2	68.9927
Ticam1	68.9827
Cep152	68.9326
Kcns3	68.7946
Pwwp2b	68.7342
Zranb1	68.6756
Zfp687	68.6191
Snrk	68.6092
Aff1	68.5486
Wnk2	68.5199
Gli1	68.5011
Fkrp	68.3719
Cand2	68.347
Rnf43	68.3383
Akap2	68.2897
Zfp169	68.284
Pars2	68.2555
Zfp830	68.0491
Zfp777	68.0142
Trim59	68.0125
Tiam2	67.9971
Ccdc66	67.9293
Ccnt2	67.8997
Gas2l3	67.8642
Klhl11	67.7307
Otud7b	67.706
Exo1	67.6446
Tmem246	67.574
Chpf2	67.3605
Zfyve16	67.3003
Ptger4	67.2976
Ppm1d	67.247
Fjx1	67.0114
Mief1	67.0055
Abl1	66.9827
Cog8	66.927
Mgat1	66.9253
Dhx57	66.7814
Caskin2	66.7687
B3gnt2	66.5821
Ubn1	66.5527
Bag5	66.4126
Ptpn14	66.33
Usp38	66.2735
Hcfc1	66.237
Itpripl1	66.2315
Zscan29	66.2103
Scaf8	66.1882
Klhl26	66.157
Scaf11	66.0762
Rgs12	66.0752
Fkbpl	66.061
Aff4	66.0418
Hjurp	66.0223
Ugt1a10	65.9514
Nedd9	65.7286
Rapgef6	65.7033
Tiam1	65.6551
Phlpp1	65.645
Nhs	65.5858
Vps13b	65.4673
Garem	65.3788
Abhd13	65.3713
Prss35	65.297
Acsl3	65.1624
Wdr33	65.126
R3hcc1l	65.0659
Wdr6	65.0655
Zfp101	64.841
Errfi1	64.8195
Kdm6b	64.6626
Tnfrsf21	64.6385
Mbd4	64.4733
Zbtb43	64.4312
Whsc1l1	64.3464
Gm20554	64.0219
Gas1	64.0114
Rtn4r	63.8614
Zbtb41	63.7848
Trp53bp1	63.7308
Dnajc14	63.7251
Fzd1	63.6304
C130021I20Rik	63.6174
Ankle2	63.5385
Nup153	63.526
Gpr125	63.5009
Ptpn13	63.4114
Zfp618	63.3779
H6pd	63.1942
Usp1	63.1512
Eri2	63.1336
Pomk	62.9943
Setdb1	62.9885
Efnb2	62.9807
Foxo1	62.9803
Arhgef26	62.9667
Mfsd6	62.9533
Dlg5	62.9438
Plxna1	62.9121
Tsc22d2	62.8783
Cbx4	62.848
Prrc2b	62.8046
Huwe1	62.6235
Rere	62.5769
Brd1	62.5674
Golga3	62.4719
Hoxa3	62.1899
Hipk2	62.0767
Nfe2l1	62.0153
Rexo1	61.966
Naa30	61.7726
Vangl1	61.4688
Fbrsl1	61.4537
Kdm6a	61.4201
Nup62-il4i1	61.2313
Nkrf	61.209
Tmcc1	61.0508
Mex3a	61.0401
Slc2a12	60.8909
Slc30a1	60.838
Ston2	60.8265
Sertad2	60.8172
Zfp629	60.8119
P2ry1	60.7993
Zfp148	60.7789
Wapal	60.5879
Birc2	60.5801
Mgat2	60.4711
Espl1	60.442
Mill1	60.3696
Mcm9	60.3105
C77080	60.248
Mios	60.2455
Pbrm1	60.2383
Tshz2	60.1397
Spty2d1	60.0824
Nbeal1	60.0291
Clcn3	59.9719
Ttll4	59.9358
Peo1	59.8401
Itprip	59.8328
Glyctk	59.8202
Rbm4b	59.8041
Megf8	59.7358
Klhl25	59.7303
Fras1	59.6286
Rev1	59.5293
Cep68	59.4174
Sgms1	59.2281
Ncoa1	59.1236
Slc5a10	59.021
Numa1	58.9971
Zfp1	58.8666
Lrrc8e	58.8481
Synj2	58.8339
Zfp266	58.8268
Zmym2	58.8146
Ptgfrn	58.6849
1600012H06Rik	58.6244
Ndst2	58.5849
Usp42	58.5603
Tab3	58.3884
Fbxo42	58.3357
Socs4	58.2904
D3Ertd254e	58.2284
Vprbp	58.2231
Cand1	58.2067
Fzd7	58.1944
Rb1	58.1365
Prss23	58.1345
Nfe2l2	58.0844
Rgma	58.0674
Evpl	58.0396
Slx4	58.033
Csrnp2	57.7709
Slc33a1	57.7349
Fam84a	57.6212
Aste1	57.557
Adamts1	57.5391
Hipk3	57.5285
Zak	57.4841
Polk	57.3524
Trp53bp2	57.2721
Brpf1	57.1919
Igsf3	57.0441
Hs6st1	56.9833
Cnst	56.9616
Phf12	56.9518
Zswim1	56.8969
Zfp783	56.8414
Mir466f-3	56.718
Nup214	56.69
Harbi1	56.5866
Sos1	56.5827
Dot1l	56.4855
Dnajc25	56.4628
Osmr	56.3555
Sp1	56.3475
Gorab	56.325
Cmtr2	56.3077
Sipa1l1	56.2637
Lpar5	56.1714
Glb1	56.0483
Vps18	55.9749
Hcar2	55.8199
Usp31	55.7813
Atp10a	55.7762
1190002N15Rik	55.728
A230056P14Rik	55.6739
Mst1r	55.6651
Arhgap29	55.658
Mis12	55.5752
Ckap2l	55.5188
Lnpep	55.4901
Sptbn1	55.4629
Nisch	55.4464
Prmt10	55.3962
Irx2	55.2944
Hspg2	55.201
Nlgn2	55.1564
Bcar1	55.1111
Sema6a	55.0816
Kdm5a	54.9529
Mastl	54.8834
Slc5a3	54.8621
Trio	54.8466
Zhx2	54.6698
2210408I21Rik	54.6028
Blm	54.5698
Zcchc11	54.5669
Adrb2	54.5538
Ptprz1	54.5488
Col8a1	54.5201
Lrrc8b	54.4442
Tbc1d25	54.4306
Zfpm1	54.4133
Lrp10	54.4012
Ttbk2	54.3683
Usp43	54.2376
Spry2	54.2111
Mdc1	54.2079
Snip1	54.1965
Tmem2	54.187
Fzd3	54.113
Mfsd5	54.1098
Fbxl3	54.0564
9430020K01Rik	54.0101
Zzz3	53.9198
Tor4a	53.8887
Otud1	53.8825
Trerf1	53.8748
Slc16a1	53.8162
Enc1	53.8094
Irf2bp1	53.7998
Tor1aip2	53.57
Zfp715	53.5632
Dhx30	53.4396
Sema4g	53.4141
Col12a1	53.4088
Samd8	53.3825
Zfp518b	53.2599
Trim13	53.2386
Gm15800	53.2354
4932438A13Rik	53.2332
Brf2	53.2032
Ext1	53.0346
Kdm3b	53.0087
Fastkd3	52.9752
4833418N02Rik	52.9622
Lphn1	52.9481
Mtg2	52.8638
Pask	52.8431
Axin1	52.8393
Cic	52.823
Specc1	52.7964
Klhl24	52.705
Ncor2	52.68
Tbccd1	52.6743
Zfp746	52.6561
Mb21d2	52.6427
Qrich1	52.5674
Senp5	52.4744
Sik3	52.4736
Zfyve1	52.4501
Kif24	52.384
Brf1	52.3838
Zfp623	52.3801
Mettl18	52.3748
Mkl2	52.3477
Psd3	52.3471
Tubgcp6	52.2991
Gpr161	52.2859
Brwd3	52.2726
Fam160a1	52.2633
Tor1aip1	52.1994
Tmcc3	52.1527
Pdzrn3	52.0516
Zmym6	52.0268
Nktr	51.9572
4930558K02Rik	51.9494
Nuak1	51.9494
Dtx2	51.8507
Tex10	51.7946
Pskh1	51.7819
Col17a1	51.7777
Lrp5	51.7646
Msl1	51.7571
Klhl36	51.5885
Zfx	51.5834
Zfp109	51.5723
Rnf219	51.5625
Daxx	51.5351
Arhgap23	51.5256
Gtf3c4	51.4944
Mia3	51.4836
4930412O13Rik	51.384
Tns3	51.3622
Plagl2	51.294
Zfyve20	51.2934
Arid4b	51.2857
Pigm	51.2679
Rasal2	51.1739
A630007B06Rik	51.0925
Limd1	51.0912
Notch2	51.0589
Phldb1	50.9553
Nod1	50.9476
N4bp2l2	50.9268
Ercc5	50.7688
Map3k1	50.7479
1810062O18Rik	50.7327
D11Wsu47e	50.6516
BC048403	50.6441
Lrrc39	50.6293
Rnf146	50.6131
Esco1	50.6084
Hoxa2	50.5047
Coro7	50.4251
Shoc2	50.4248
Gmeb1	50.359
Zfp948	50.3284
Zfp251	50.3081
4931406P16Rik	50.2963
Zbtb8a	50.2923
Dolk	50.2429
Ttc3	50.2126
Axin2	50.1857
C1galt1c1	50.1655
Zbtb9	50.132
Itga1	50.1306
Fnip2	50.1056
Lrrc14	50.1004
Tigd2	50.083
Zbtb7c	49.9727
Mir680-2	49.9355
Pik3r4	49.9183
Smek1	49.8292
Akap1	49.8043
Smg6	49.7078
Gpatch3	49.5731
Fam208a	49.5602
Mast2	49.3695
Zfp870	49.3595
Cenpj	49.3569
Col18a1	49.3362
Ankrd9	49.2679
Zfp408	49.2457
Dync1h1	49.2343
Slc16a7	49.2162
Fbxo46	49.1705
Tob1	49.143
C030046E11Rik	49.1058
Frmpd1	49.1032
Clp1	49.0709
Opn3	49.0004
Jag2	48.9626
Tmtc2	48.9527
Dnttip2	48.9319
Prps1l3	48.928
Tbcd	48.9215
Wnt5b	48.893
Mogs	48.802
Asnsd1	48.78
Pygo1	48.7607
Zmynd8	48.743
Klf11	48.6797
Zfp574	48.6327
Dennd4c	48.5968
Tsc1	48.5874
Elk4	48.5536
Chst15	48.5235
Stk35	48.4902
Metrnl	48.3659
Pik3c2a	48.3471
Fbxl5	48.2858
Adam1a	48.2803
Baz1b	48.2187
Ehbp1	48.129
Sptbn2	48.0986
Il17ra	47.9594
Tmem28	47.9019
Magee1	47.9013
Zfp707	47.8522
Kif20b	47.7128
Ddx24	47.688
Trak1	47.6796
Gin1	47.6551
Flna	47.6316
Mtmr3	47.6153
Usp2	47.6031
Chaf1a	47.5793
Lama3	47.5129
Ccser2	47.4049
Pikfyve	47.3504
Ier5l	47.3433
Tbc1d10b	47.3326
Irgq	47.3122
Mis18bp1	47.3121
Foxn2	47.2817
Pkp4	47.2255
Zfp36l2	47.1806
D430042O09Rik	47.0217
Inppl1	46.987
Pi4kb	46.8474
Pwwp2a	46.8364
Cebpz	46.8189
Shprh	46.7867
Adprm	46.7537
Il4ra	46.7488
Fry	46.7364
Tgfbrap1	46.7274
Mtmr4	46.6301
Wfikkn1	46.6135
Med12l	46.5788
Suv39h2	46.5008
Zfp280d	46.4869
Zdbf2	46.4506
Neat1	46.4268
Shroom2	46.4229
Plekhm1	46.391
Pde4d	46.3469
Ubap1	46.3366
Pxdn	46.2935
Lama5	46.2906
Fam214a	46.2842
Rictor	46.2787
Bmpr2	46.2484
2410016O06Rik	46.177
Irx4	46.1732
Csrnp1	46.1623
Clip1	46.0648
Mertk	46.0235
Ptar1	46.0121
Kctd6	45.9953
Tmem102	45.9175
Rab33b	45.8699
Trpm1	45.7985
Gna13	45.7808
Arhgap39	45.7437
Ggta1	45.7142
Slc19a1	45.6859
Snapc4	45.6468
Specc1l	45.5495
Dab2ip	45.5475
Sugp2	45.5438
Fem1a	45.536
Adat3	45.5148
Col27a1	45.502
Plxnb1	45.498
Atn1	45.381
Zscan2	45.3505
Foxn3	45.3349
Birc3	45.3023
Apbb2	45.2771
Zfp90	45.23
Tada2b	45.2198
Svil	45.2011
2510009E07Rik	45.1885
Zcchc6	45.1126
Zfp64	45.1107
Zfp131	45.0319
Lclat1	44.965
Apcdd1	44.9121
Met	44.8994
Kcnj15	44.8845
Cnnm3	44.8313
Erf	44.7807
Has3	44.7285
Itpkb	44.7212
Ccdc80	44.7066
Rbm33	44.6794
Trmt10c	44.6676
Xrcc2	44.6516
Fzd5	44.6206
Fam178a	44.5892
Fam46b	44.5221
Cant1	44.5147
Cnot4	44.4481
Dstyk	44.4306
Setmar	44.4282
Ankrd12	44.4093
Igf1r	44.3565
5830417I10Rik	44.305
BC068281	44.3036
Rab11fip3	44.289
Tpbg	44.2355
Pfkfb2	44.2277
Pnpla8	44.2013
Nckap5l	44.1863
Peli2	44.1292
1700020I14Rik	44.0732
Itpkc	44.0678
Etv3	44.0532
Mfap3	44.01
Lactb	43.9562
Fzd8	43.9446
Slc45a3	43.921
Zbtb26	43.8738
Ndufaf1	43.8128
Bcor	43.7942
Ncoa3	43.7603
Nlrx1	43.7491
Ppp1r13b	43.7391
Mycbp2	43.7032
Bahd1	43.6887
Camsap3	43.6828
Baz2b	43.624
Lrfn3	43.6136
Egr2	43.5645
Lpar1	43.5522
Thnsl1	43.5241
Itpripl2	43.5208
Fut11	43.5031
Map3k4	43.465
Dennd2c	43.4542
Fgd6	43.4076
Mdm4	43.3703
Ski	43.3277
Rfx5	43.293
2610507B11Rik	43.2666
Arid5a	43.2553
Cbll1	43.2418
Plxnb2	43.2188
Mier3	43.1845
Gfod1	43.1417
Nin	43.1241
Brpf3	43.0631
Crybg3	43.0226
Epc1	42.9999
Skil	42.9946
Cyhr1	42.9909
Acad11	42.9686
5430417L22Rik	42.9185
Foxm1	42.9021
Rbm12b2	42.8944
Zfp672	42.8678
Usp9x	42.8371
Edem3	42.7914
Rnf169	42.7891
Slc25a46	42.7883
Kctd1	42.7651
A430033K04Rik	42.7565
Phactr4	42.7238
Zswim8	42.6984
Egr1	42.6692
Ajuba	42.6473
Pcnxl3	42.5747
Phip	42.5499
Zxdc	42.5071
Nfrkb	42.4694
9330020H09Rik	42.4678
Ch25h	42.4481
Fam69b	42.4408
Agrn	42.3915
Fam160a2	42.3904
Pex11a	42.3802
Phax	42.3174
Zfp768	42.2347
Mir466f-2	42.2338
Trip12	42.2141
Klf7	42.1029
Snai2	42.1005
Mocs3	42.0508
Sphk1	41.9652
Myadm	41.9632
Kdm2a	41.9471
Rhno1	41.9055
Zfp317	41.8704
Hps4	41.8451
Kidins220	41.838
Kif13a	41.8073
Chdh	41.7711
Capn15	41.7603
Mtf1	41.6965
Gse1	41.6757
Btbd3	41.6167
Ddx42	41.5711
Ctcf	41.5659
Cdcp1	41.5538
Xiap	41.5322
Fam83d	41.5266
Rapgef2	41.3539
Atp7a	41.3395
Slc45a4	41.3221
Ccdc176	41.3135
Thbs1	41.2058
Chd3	41.1608
Nudt7	41.1353
Nom1	41.1235
Mapk6	41.0796
Helz	41.0498
Tnk2	41.0262
Ltb4r2	40.9224
Lrrk1	40.8742
Ap5m1	40.8734
Dyrk1a	40.8729
Lzts2	40.8306
Lrp4	40.8062
Scyl2	40.7263
2210018M11Rik	40.7215
Gas2l1	40.6741
Hr	40.6531
Trim39	40.6438
Fam110b	40.6392
Hyal2	40.6024
Nfil3	40.5579
Zfc3h1	40.5251
Nck1	40.4955
Iqsec1	40.4029
Zbtb16	40.3957
Ppp1r9b	40.3953
2610306M01Rik	40.3939
Ripk1	40.375
Atxn7	40.3632
Wdr89	40.3247
Fam46a	40.2892
Clip2	40.2811
Nr4a1	40.2614
Nab1	40.2334
Rel	40.2119
Klf10	40.1826
Foxn1	40.1747
Urb1	40.1351
Sox12	40.1333
Dbf4	40.1204
Mrps2	40.0659
Egr3	40.0624
Zbtb37	40.0187
Pom121	40.0182
Zfp329	40.0107
Ubqln2	39.9997
Otud4	39.9923
Pvrl1	39.98
Micall2	39.9698
Kdm5c	39.9663
Eif4g1	39.9515
2310057M21Rik	39.8869
Lysmd3	39.8502
Dcun1d3	39.842
Rtn4	39.7743
Ccdc71	39.7707
Snrnp35	39.7555
Fam193b	39.7346
Fzd2	39.7001
Synpo	39.6906
Fbxl4	39.6797
Pml	39.6755
Ppp1r18	39.6593
Ppm1a	39.6571
Gapvd1	39.5917
Baz2a	39.5669
Ntn4	39.5449
Klf15	39.5445
Lrig2	39.5287
Inpp5f	39.4864
Rbm14-rbm4	39.4768
Arf6	39.4605
Arhgap12	39.414
Lrrc8a	39.3721
Bcdin3d	39.3538
Sphk2	39.3073
Erbb2	39.1862
Ipmk	39.1561
Dennd1b	39.1419
E430018J23Rik	39.0905
Tank	39.0837
4932416H05Rik	39.0723
Dmwd	39.0471
Tmem132a	39.028
Dusp8	39.0165
Arid4a	39.015
Nr1d2	38.9539
Sgpp1	38.9101
Fam35a	38.8852
Senp6	38.8841
Ralgapa1	38.8639
Zbtb7a	38.8609
Spred1	38.8605
Itgb4	38.8592
Spred2	38.8351
Brd4	38.805
Fam193a	38.8003
Plekhg1	38.7444
Parg	38.7122
Sertad4	38.6713
Tut1	38.6614
Smad7	38.6307
Camsap1	38.6153
Bmp4	38.605
Taf5l	38.5934
Krcc1	38.5792
Fam212b	38.5687
1810055G02Rik	38.5484
Kdf1	38.4906
Shb	38.4314
Tmem51	38.4309
Sh3d21	38.4063
Txndc11	38.3747
Trim56	38.3703
Nol8	38.314
Satb1	38.2652
Stard13	38.2603
Mepce	38.2554
Bivm	38.2441
Zufsp	38.2294
Etaa1	38.2231
Peak1	38.2176
Sash1	38.1744
Fam69a	38.1608
Lin54	38.158
Map3k11	38.0726
Slk	38.063
Zfp383	37.991
Slc35e4	37.9883
Slc12a9	37.9466
Adar	37.912
Nipal1	37.9054
Trim41	37.9048
S1pr2	37.8997
Dusp6	37.8826
Homez	37.8672
Epha2	37.8625
C2cd3	37.8353
Plxna2	37.811
Oxsm	37.8008
Btbd11	37.7576
Sema4c	37.7572
Tspyl1	37.7174
Zbtb2	37.7089
Irx5	37.7019
A830080D01Rik	37.6986
Atad2	37.655
Ogfrl1	37.6445
5930412G12Rik	37.6443
Peli1	37.6205
Snx21	37.5916
Paqr7	37.5094
Ube2o	37.5053
N4bp3	37.5009
AW209491	37.4605
Fam20b	37.441
Jag1	37.3946
Plekhm3	37.3803
Ubtd2	37.3719
Sin3a	37.3362
C1galt1	37.332
Zkscan17	37.3127
Col7a1	37.3096
Exo5	37.2506
Map4	37.2462
Uspl1	37.2379
Glt28d2	37.2128
Keap1	37.2022
Whsc1	37.1855
Klf4	37.1713
Zfp799	37.136
Ifi202b	37.0648
Nat2	37.0235
Ptpn12	37.0177
Fastkd2	37.0102
Ric8b	36.9686
Dsg2	36.9267
AW554918	36.8754
Map10	36.8649
Syde1	36.8641
Msantd4	36.8469
Slc25a51	36.8372
Spry1	36.8254
D930015E06Rik	36.7559
Zfp655	36.7538
Fam98a	36.7476
Zfp551	36.7323
Anpep	36.6227
2410002F23Rik	36.6072
Shq1	36.6032
Zfp84	36.5633
Snx18	36.5464
Pex12	36.5459
Fam110a	36.535
Gzf1	36.5229
Igsf9	36.5032
Ifnar2	36.4909
Lgr6	36.3691
Csgalnact2	36.3639
Htr1b	36.3232
Msantd2	36.2898
Uaca	36.2552
Gpr19	36.2127
Plxna3	36.1924
Ncoa2	36.1774
Chpf	36.177
Mut	36.1108
Exosc6	36.091
Rpap2	36.049
Hcfc2	36.0473
Fut1	36.0242
Smg1	36.0088
Arhgap25	35.9758
Iba57	35.974
Med18	35.9567
Slc16a6	35.903
Pde4dip	35.8929
Adcy3	35.887
Fitm2	35.8749
Eif3a	35.8713
Il6st	35.8385
Alg11	35.8294
Lamc1	35.8048
Lins	35.7722
Flnb	35.7692
Rlim	35.7482
Wdr53	35.7404
Hspa5	35.6194
Tefm	35.6106
Ndst1	35.5726
Spata2	35.5215
Taf3	35.517
Mkl1	35.4762
Pdpr	35.4283
Akap8	35.3612
Amotl1	35.3053
Klf5	35.2991
Ttf1	35.2687
Hunk	35.2531
Nfatc4	35.1931
Nrg2	35.1919
Plekhh2	35.1375
F2rl1	35.1237
Hspa14	35.0864
Astn2	35.0226
Prdm11	35.0096
Tatdn2	35.0009
Klhl20	34.9629
Cux1	34.9438
Elf1	34.9277
Fbxo18	34.8872
Rnf168	34.8731
Hlcs	34.8479
Polq	34.809
Sh3pxd2b	34.7652
Sema3c	34.7612
Ercc4	34.7319
Bai2	34.7257
4833420G17Rik	34.7013
Csrp2bp	34.6803
Arl4a	34.6671
Clspn	34.6653
Mettl13	34.6604
Pogk	34.6479
Terf2ip	34.599
Zyg11b	34.5757
Ehmt1	34.5548
Suox	34.4946
St5	34.4837
Tjp1	34.4064
Slc39a6	34.3683
Akap10	34.3518
Fbxo10	34.3341
Slc35a5	34.3292
Kcnq1	34.3147
Zfp748	34.3038
Arsi	34.2367
Tmem185b	34.2351
Smarcal1	34.2313
Pde12	34.2308
St7l	34.2273
Mtmr10	34.2101
Hs3st6	34.2063
Gcc2	34.195
Dsg3	34.1701
Zfp319	34.1363
Kdm5b	34.1218
Zfp398	34.0893
Rp2h	34.0562
Trmt5	34.0118
Zfp874b	33.9965
Ppp1r15a	33.9638
Brinp1	33.9576
Mir15b	33.8887
Slc38a10	33.8643
Secisbp2l	33.7363
Klf6	33.6944
Sema3d	33.6699
Hoxb8	33.6083
Cbx2	33.5942
Rnpepl1	33.5341
Lphn3	33.5135
Krba1	33.5099
H19	33.5036
Dph7	33.5009
Zadh2	33.4792
Foxo6	33.433
Gab1	33.4207
Ipo13	33.392
D16Ertd472e	33.3899
Impad1	33.3591
Tbc1d9b	33.3213
Fhod3	33.2983
Matr3	33.2961
Zfp597	33.29
Epg5	33.2425
Toe1	33.2372
Ankib1	33.2371
Arhgef40	33.2344
Zbtb34	33.2323
Bzrap1	33.1422
Cyld	33.111
Helb	33.0978
Plekho2	33.0419
Cdca4	33.0352
Isg20l2	33.0179
Elovl6	33.015
Fam189a1	32.9751
Nr4a2	32.9611
Epc2	32.9476
Zkscan5	32.9227
Fnip1	32.8965
Nup98	32.8699
Klhl21	32.8625
Zfp39	32.8508
Purg	32.8083
Zfp212	32.7649
2310003H01Rik	32.7276
Lemd3	32.718
Myc	32.6668
Ptpn21	32.6614
Dopey2	32.6077
Osgin2	32.6037
Cul7	32.586
Zcchc8	32.5854
Wnt6	32.5805
Snx33	32.5399
Lrig1	32.523
Cln8	32.4897
Mgea5	32.4752
Haus6	32.3274
Zscan25	32.3252
Myh9	32.2762
Csgalnact1	32.1972
Klhl42	32.1892
Gja1	32.1791
Sema6d	32.1284
Panx1	32.1148
Zfp526	32.1044
Nyap1	32.0986
Zfp770	32.0983
Ccdc181	32.0544
Maz	32.0417
Zfp821	32.0335
Plekhm2	32.0255
Cipc	32.0255
Ifngr1	31.9685
Morc3	31.9532
Bdp1	31.9345
Epn2	31.9279
Gjc1	31.8975
Incenp	31.828
Ercc6	31.8052
Cdca2	31.7808
Sec24a	31.7136
Dusp14	31.7103
Glcci1	31.7
Ip6k1	31.6941
Phf23	31.6677
Fam134b	31.667
Ring1	31.6615
Bhlhe40	31.648
Crebrf	31.6161
Rspry1	31.6066
Tuba4a	31.5985
B3gnt8	31.5519
Bcl6	31.526
Slc20a2	31.4862
Cxcr4	31.4639
Slc9a1	31.432
Vps13a	31.3988
Qtrtd1	31.3849
Pde4b	31.3564
Tns1	31.3434
Zfp62	31.3242
Crk	31.3218
Tbc1d24	31.3067
Tnfsf18	31.289
Scara3	31.2812
Sec24b	31.2759
Pcsk7	31.245
Ptch2	31.2304
Zfp827	31.2041
Synrg	31.1885
Ptpdc1	31.1445
Ccnj	31.1288
Gpatch2	31.0972
Polr1b	31.0615
Arhgef3	31.0508
Ckap4	31.0486
Snrnp70	31.0011
Chd7	30.9898
Pex13	30.9544
Ccdc127	30.946
Srpk2	30.9443
Rad52	30.9378
Slc16a3	30.8807
Cstf1	30.8781
Hyal1	30.8454
Sprtn	30.8425
Tdrd3	30.8356
Pomgnt2	30.8286
Tmtc3	30.7843
Zfp579	30.7786
Tex2	30.7332
Lpcat2	30.7171
Bclaf1	30.6967
Pigv	30.6788
Fam83c	30.6769
Esf1	30.6663
Mettl4	30.6645
Pard6g	30.6319
S100pbp	30.6265
Gins3	30.6214
Sav1	30.5712
1700021F05Rik	30.5507
Asprv1	30.5322
Fbxo38	30.4728
Fbln2	30.4513
Wnt7a	30.4411
Sox9	30.4358
Hmgxb4	30.4325
Fbxo5	30.3583
Dclre1a	30.3576
Eif2a	30.3532
Trpm7	30.3467
Zfp263	30.3323
Cnnm2	30.3259
Degs1	30.2852
Magi1	30.2525
Plekhg5	30.2259
Pex2	30.2142
Zfp229	30.2072
Zfp942	30.1607
Tpst2	30.1578
Prdm4	30.1404
Hmgxb3	30.1161
Fn1	30.0448
Fan1	30.0028
Ccdc55	30.0008
Arhgef28	29.9713
Eef2	29.9496
Nrd1	29.9461
Usp16	29.9461
Hs3st1	29.9444
Hspa13	29.9426
Junb	29.8893
Prpf4b	29.8488
C87436	29.838
Zfp36	29.7974
Crebzf	29.7728
Dsc3	29.7645
Myo18a	29.7611
Cluh	29.7563
C1s1	29.6841
Abcc10	29.6609
Sik1	29.637
Nfia	29.6264
Sfpq	29.6047
Sac3d1	29.5639
Aen	29.5638
Rnf145	29.543
Pou3f1	29.4978
Slc25a43	29.4908
Zcchc3	29.4293
3110043O21Rik	29.4221
Ocln	29.4136
Mon1b	29.3928
Ckap2	29.3697
Zfp13	29.3362
Ppm1b	29.3347
Dbr1	29.3334
Mapk1ip1l	29.306
Trim11	29.2894
Firre	29.2783
Cactin	29.2599
Tmem57	29.2164
Pelp1	29.2139
Tgfbr2	29.213
Gstcd	29.1933
Tmem81	29.1594
Sephs2	29.1505
Arhgef12	29.1452
Ip6k2	29.1372
Csf1	29.1115
3632451O06Rik	29.1034
Wbp1l	29.0875
Zscan12	29.0347
Lrrn2	28.9958
Mterfd2	28.9836
Hps6	28.9674
Fryl	28.9629
Kin	28.945
Usp27x	28.9307
Gprc5b	28.9143
Utp3	28.8726
Zbtb48	28.8653
Cttnbp2nl	28.8579
Pxylp1	28.8561
Nxt1	28.8551
Cenpl	28.8523
Dennd5a	28.7695
Gjb5	28.7662
Ctdp1	28.7617
Rbm6	28.7536
Mical3	28.7426
Ackr3	28.7338
Sema4b	28.7248
Sox4	28.7242
Plekha7	28.7186
Prdm15	28.7133
Armcx4	28.7052
Tceal1	28.693
Tm9sf1	28.6842
Bdkrb2	28.6604
Rnf39	28.636
Tesk2	28.6197
BC027231	28.6174
Tmem131	28.6067
Cog1	28.6065
Pank1	28.6055
Zswim4	28.603
Gfod2	28.567
Lamc2	28.5312
Gmeb2	28.5257
Hs3st3b1	28.5095
Tmem175	28.489
Tfap2c	28.4582
Six5	28.4405
Adpgk	28.4339
Tmem186	28.4265
Smek2	28.4235
Fbxw7	28.4173
Trim8	28.37
Zfp788	28.3583
Trim7	28.3321
Ggt6	28.3121
Jade1	28.3076
Fbxl18	28.2933
Zfp956	28.2916
Spsb1	28.2727
Ftx	28.2459
Msantd3	28.2396
Abcb9	28.2326
Prpf8	28.218
Pkn2	28.2102
Zfp449	28.2025
Slc25a28	28.1999
Pcm1	28.1938
Zfp758	28.1604
Ralgapa2	28.1548
Cdc42ep4	28.1313
Hexim1	28.0857
Scaf4	28.0823
Slc2a4rg-ps	28.0705
Slco3a1	28.0704
Nrbf2	28.0379
Faxc	28.005
Xpc	27.9967
Kbtbd4	27.9941
Pms2	27.991
Ptpn23	27.9742
Mcm3ap	27.974
Mdm2	27.8991
2700081O15Rik	27.8818
Tmem11	27.8303
Zhx3	27.763
Siah1a	27.7549
Gm7854	27.7336
E2f8	27.7179
Ankrd49	27.71
Cdk5rap2	27.6875
Gba2	27.6428
Pdia4	27.6386
Mynn	27.6379
Ssh1	27.6146
Slc35b2	27.6115
Rn45s	27.6077
Nfatc1	27.6023
Smc4	27.5938
Ap4e1	27.5874
Rnf25	27.5665
Tmf1	27.5664
Psd4	27.5615
Ccpg1	27.5535
Trib1	27.5516
Sirt1	27.5393
Zscan20	27.5374
Gtf3c1	27.5047
Top2b	27.4524
Ccrn4l	27.4376
Zbtb25	27.4356
Vezt	27.3952
Gjb3	27.3941
Rpap1	27.386
Ank3	27.3843
Slc10a3-ubl4	27.3573
Bloc1s3	27.3468
Tbc1d14	27.3279
Narg2	27.3257
Ccar1	27.2916
Zfp955a	27.2835
Pik3r1	27.2657
Myo10	27.21
Bag3	27.2026
Ddx20	27.1973
Vkorc1l1	27.177
Adcy6	27.1434
Acbd3	27.1433
Fen1	27.0943
Zbtb44	27.0137
Cep162	27.0062
Zfp760	27.0032
Tacstd2	26.9706
Jarid2	26.9662
Snx13	26.9558
Zbtb45	26.9395
Lamb3	26.929
Ammecr1l	26.9227
Dusp10	26.895
Atp2b1	26.8922
Bcl2	26.8886
Lifr	26.8885
Mad2l1bp	26.83
Rad54l2	26.8253
Nipal4	26.804
Myo9b	26.7897
Rnf26	26.7587
Rpusd2	26.758
Mysm1	26.7543
Ppapdc2	26.7503
9630033F20Rik	26.7412
Rps6kc1	26.7174
Hoxb3	26.7062
Baiap2l1	26.6681
Ptprs	26.6522
Piga	26.6506
2020-03-07	26.6367
Trps1	26.6247
Umps	26.5946
Thada	26.5543
Insr	26.5536
Tpst1	26.5457
Dnajb1	26.5404
Cabin1	26.5243
Zdhhc5	26.4809
9330162012Rik	26.4735
Eprs	26.4643
Mms22l	26.4556
Fgfr2	26.4418
4632415L05Rik	26.4288
Slc39a7	26.4024
Spg11	26.3986
Atad2b	26.3567
Hif1a	26.3558
Tmem60	26.3557
Ninl	26.3431
B3gnt1	26.3249
Dcbld1	26.3184
Dll1	26.3121
Nfe2l3	26.2424
Vwa2	26.1841
1700096K18Rik	26.1674
4931414P19Rik	26.1583
Cdh3	26.1278
Itga6	26.0685
Wnt4	26.0492
Kif1b	26.0412
Arc	26.0224
Rdh14	25.9901
Diexf	25.9525
Rbbp8	25.9412
Tmcc2	25.9395
Hnrnpul1	25.918
Adck2	25.9063
Atp2b4	25.8738
Asb8	25.8583
Zfp945	25.8343
Cdc42ep1	25.8294
Plekhg6	25.8242
Rrbp1	25.8116
Pkp1	25.8022
Fam134a	25.7976
Polr3e	25.7965
Lrig3	25.7882
Lig3	25.7801
Pop7	25.7522
Ankrd10	25.7316
Irx1	25.7257
Vps54	25.7246
Taf6l	25.7186
1500011B03Rik	25.6878
Fos	25.6831
Srfbp1	25.6511
Ggps1	25.6478
Usp49	25.6349
Usp36	25.6313
Zfp219	25.626
Stard4	25.6244
Pcbp1	25.5223
Ppargc1b	25.4861
Crkl	25.486
Klhl22	25.4777
E2f2	25.4203
Il1r1	25.4042
Chd2	25.3977
Zfp688	25.3974
Neurl2	25.3767
6030458C11Rik	25.3685
Rin2	25.366
Nfix	25.3614
Dcaf8	25.3598
Dyrk1b	25.3583
Cobl	25.3582
Exoc3	25.3548
Pcyox1	25.3227
2610507I01Rik	25.3166
Uhrf1bp1	25.3137
R3hdm2	25.3106
Dtx3l	25.3083
Per1	25.2831
Adora2b	25.2772
2610008E11Rik	25.2601
Erbb3	25.2166
Jun	25.2155
Trrap	25.1782
Plekhf2	25.1691
Cdc42bpa	25.1678
Tango6	25.1504
Dnajb4	25.1421
Tspyl2	25.1343
Sbk1	25.1076
Mmgt2	25.0993
Tgs1	25.0871
Yap1	25.0863
Sh3rf2	25.0775
9130023H24Rik	25.0508
Zkscan2	25.0361
Adrb1	25.0308
Armc5	25.0218
Paxip1	24.9932
G2e3	24.9865
Aim2	24.948
Rhobtb1	24.9436
Cd44	24.9296
Elf4	24.8977
Furin	24.8931
Brd2	24.8742
Dnajb9	24.8718
Sipa1	24.8553
Postn	24.8112
Ttc30b	24.7806
Amotl2	24.7782
Zfp7	24.7768
Rnf111	24.7698
Jade2	24.7325
Naglu	24.7316
Zfyve26	24.7206
Srpk1	24.7095
Pard6b	24.6934
Ncdn	24.6674
Krt5	24.6441
Ell2	24.6326
Dcaf10	24.6316
Ikzf2	24.6239
Hinfp	24.6159
Dhx9	24.6142
Fam129b	24.6119
Frk	24.5801
Rwdd3	24.5229
Cul3	24.4689
Phospho2	24.4219
Fat4	24.4197
Tgif1	24.4191
Gm20604	24.3868
Thbd	24.3861
Snx19	24.3594
Acsf3	24.347
Zfp472	24.3327
Gon4l	24.3195
Zfp61	24.2959
Zfp790	24.2917
Hnrnpm	24.2835
Sde2	24.2547
Lmo7	24.2543
Traf5	24.2378
Rrnad1	24.2202
Vsig10l	24.1969
Agtr1a	24.1904
Mplkip	24.1874
Cenpe	24.187
Cntln	24.1447
Marf1	24.1422
Tjap1	24.1251
Kcnj2	24.1106
Tfap2b	24.1088
Agbl5	24.0846
Klhl13	24.0612
Fam210a	24.0489
Zscan26	24.0455
Dlk2	24.0332
Mesdc1	24.0246
Azi2	24.02
Bend3	24.0115
Zfp568	24.011
Uvrag	24.0069
Trim16	23.994
Gm9776	23.9939
Adamts14	23.985
Scyl3	23.9703
Lacc1	23.9627
Ndufv3	23.9615
Thap2	23.9548
Gnptab	23.9372
Nif3l1	23.9345
4933427D14Rik	23.9229
Sgol1	23.8905
Mir297-2	23.889
Slco4a1	23.8807
Zrsr2	23.8742
Aoc2	23.8672
Chd4	23.8393
Cramp1l	23.8247
Ltb4r1	23.8014
Zmym5	23.7934
Inpp5e	23.7771
8030462N17Rik	23.7724
Nedd4	23.7678
Tll1	23.7625
Egln2	23.7559
Bcar3	23.7355
Npcd	23.7118
Ngf	23.6832
Eif4g3	23.6749
[truncated: 6,428 more rows]

## Sheet:  CDS m6A GSEA-KEGG
Pathway	p value	Normalized enrichment score	Leading Edge Genes
KEGG_LYSINE_DEGRADATION	0.009	1.33378	Nsd1,Setd2,Ash1l,Setd1b,Setd1a,Setdb1,Dot1l,Suv39h2,Setmar
KEGG_BASAL_CELL_CARCINOMA	0.021	1.26726	Apc,Gli3,Gli2,Fzd10,Ptch1,Bmp2,Fzd6,Gli1,Fzd1,Fzd7,Fzd3,Axin1,Axin2,Wnt5b,Fzd5,Fzd8,Fzd2,Bmp4,Wnt6,Ptch2,Wnt7a
KEGG_NOTCH_SIGNALING_PATHWAY	0.042	1.24665	Crebbp,Ep300,Maml2,Maml3,Notch1,Maml1,Ncor2,Dtx2,Notch2,Jag2
KEGG_PENTOSE_AND_GLUCURONATE_INTERCONVERSIONS	0.0932203	1.31276	Ugt1a10,Ugp2,Ugdh
KEGG_STEROID_HORMONE_BIOSYNTHESIS	0.110032	1.29336	Ugt1a10,Hsd17b12
KEGG_MISMATCH_REPAIR	0.114343	1.21388	Mlh3,Msh6,Exo1,Pms2
KEGG_NOD_LIKE_RECEPTOR_SIGNALING_PATHWAY	0.129	1.15417	Tab2,Tnfaip3,Nod2,Traf6,Birc2,Tab3,Nod1,Birc3,Xiap
KEGG_ASCORBATE_AND_ALDARATE_METABOLISM	0.171202	1.23817	Ugt1a10,Aldh2
KEGG_DRUG_METABOLISM_CYTOCHROME_P450	0.172009	1.23097	Ugt1a10,Gsto1
KEGG_METABOLISM_OF_XENOBIOTICS_BY_CYTOCHROME_P450	0.176915	1.23852	Ugt1a10,Gsto1,Ephx1
KEGG_SELENOAMINO_ACID_METABOLISM	0.179409	1.20304	Mars2,Lcmt2,Sephs2,Ggt6
KEGG_RETINOL_METABOLISM	0.185941	1.22573	Ugt1a10,Rdh10
KEGG_NEUROACTIVE_LIGAND_RECEPTOR_INTERACTION	0.189	1.12867	Ghr,Nr3c1,Ptger4,P2ry1,Adrb2,Lpar1,Ltb4r2,S1pr2,Htr1b,F2rl1,Bdkrb2,Adora2b,Adrb1,Pard3,F2r
KEGG_AMINO_SUGAR_AND_NUCLEOTIDE_SUGAR_METABOLISM	0.202405	1.14544	Fpgt,Gmppb,Uap1
KEGG_GLYCOSAMINOGLYCAN_BIOSYNTHESIS_KERATAN_SULFATE	0.213012	1.19107	Chst2,B3gnt2,St3gal2,B4galt1
KEGG_WNT_SIGNALING_PATHWAY	0.21978	1.07143	Apc,Crebbp,Ep300,Fzd10,Chd8,Nfat5,Lrp6,Prickle1,Nfatc3,Fzd6,Fzd1,Vangl1,Fzd7,Fzd3,Axin1,Lrp5,Axin2,Wnt5b,Fzd5,Fzd8,Fzd2,Nfatc4,Myc,Wnt6,Wnt7a,Nfatc1,Wnt4,Jun,Wnt16,Vangl2,Ctnnb1
KEGG_LONG_TERM_POTENTIATION	0.227	1.09997	Crebbp,Ep300,Plcb3,Itpr3,Calml3,Ppp1r12a
KEGG_PRION_DISEASES	0.237614	1.15391	Notch1,Egr1,Lamc1,Hspa5
KEGG_FRUCTOSE_AND_MANNOSE_METABOLISM	0.245207	1.13272	Fpgt,Pfkfb2

## Sheet: GSEA-KEGG high m6A&translation
Pathway	p value	Leading Edge Genes
ECM-receptor interaction	5.84948e-05	Fn1;Hspg2;Lama3;Lama5;Thbs1;Tnc;Itga1;Itgb4;Lamc1
Basal cell carcinoma	0.00198215	Fzd1;Fzd7;Fzd8;Gli2;Gli3;Ptch2;Fzd2
Notch signaling pathway	0.00409381	Crebbp;Jag1;Notch1;Notch2;Ncor2;Ep300
Focal adhesion	0.00511543	Arhgap5;Fn1;Igf1r;Lama3;Lama5;Thbs1;Tnc;Itga1;Flna;Itgb4;Lamc1;Flnb
Arrhythmogenic right ventricular cardiomyopathy (ARVC)	0.0147286	Dsg2;Gja1;Dsp;Itga1;Itgb4
Ubiquitin mediated proteolysis	0.0149677	Brca1;Birc6;Trip12;Ube3a;Map3k1;Huwe1;Cul7;Ube2o;Herc1;Klhl9
Pathways in cancer	0.0202306	Brca2;Crebbp;Fn1;Fzd1;Fzd7;Fzd8;Gli2;Gli3;Igf1r;Lama3;Lama5;Msh6;Ptch2;Fzd2;Lamc1;Ep300
Prion diseases	0.0225843	Hspa5;Notch1;Lamc1
Renin-angiotensin system	0.0268343	Anpep;Lnpep
Tight junction	0.047349	Myh9;Ocln;Sptbn1;Tjp1;Amotl1;Ash1l
Melanogenesis	0.047349	Crebbp;Fzd1;Fzd7;Fzd8;Fzd2;Ep300
Adherens junction	0.057904	Crebbp;Igf1r;Ptprf;Tjp1;Ep300
Intestinal immune network for IgA production	0.0881513	Cxcr4
Type II diabetes mellitus	0.0999483	Irs1;Socs4;Irs2
