# Supplementary material for: m6A RNA methylation impacts fate choices during skin morphogenesis
Source: eLife. 2020 Aug 26;9:e56980. doi: 10.7554/eLife.56980 (PMC7535931; doi:10.7554/eLife.56980)
Supplement: Supplementary file 3. — The extent of differential gene expression assessed by Z score (reflecting the extent of differential expression) and false discovery rate (FDR) was calculated between groups of Ctrl and cKO cells with the same identity, as indicated by sheet names in the file. [file elife-56980-supp3.xlsx]

## Sheet: Epi Basal
Gene ID	Z score (cKO/Ctrl)	False discovery rate
Rpl35	34.7765	5.9696e-231
Nxt1	33.7075	3.36089e-224
Mrpl43	33.3135	5.73572e-218
Rpp25l	31.2186	2.5907e-204
Rpl36al	27.1046	6.63294e-146
Mrps34	26.263	1.37919e-140
Stfa3	-22.7197	1.10501e-115
Mrpl46	22.597	8.26914e-110
Rpl41	23.1857	2.78042e-108
Krt15	-22.9465	9.9458e-108
Llph	22.5422	7.57977e-103
Sar1a	22.1143	8.88133e-103
Hist3h2a	-21.3497	3.12463e-100
Sfn	21.7797	3.84243e-96
Hist1h1c	-20.0923	6.94068e-95
Scand1	21.3652	3.71424e-93
Cxcl14	-21.1401	9.3027e-91
Rps29	21.0008	1.58414e-89
Gadd45gip1	20.7568	3.24871e-89
Phax	20.5233	4.2683e-89
Rpl24	-20.7947	5.53418e-88
Nop10	20.5682	5.46567e-86
Apex1	20.3555	1.41023e-85
Krt5	-20.3058	1.92545e-84
Mrpl51	20.2677	5.68616e-84
Tmem167	19.9489	3.74461e-81
Lsm10	19.0108	1.83082e-79
Mrpl14	19.4526	3.52489e-78
Dynll1	19.405	1.19301e-77
Tomm7	19.2747	5.70786e-76
Polr2l	18.3826	7.96925e-76
Pop7	18.5087	3.64355e-75
Ncl	18.8685	5.38334e-73
Rrs1	18.3178	6.6774e-72
Cdc42ep5	17.8554	6.73254e-71
Txnl4a	18.0249	2.44101e-69
Tmem11	17.8892	6.10767e-69
Btf3	-18.2201	4.67426e-68
Tpgs1	17.507	5.71149e-68
Chchd1	18.0529	2.65532e-67
Gnb2l1	-18.0208	1.73653e-66
Fdx1l	17.3291	7.84927e-65
Coa7	16.5907	1.54795e-64
Rplp2	17.7372	1.85408e-64
Fam212a	16.3496	6.7234e-64
Uqcrc1	-17.5627	1.51673e-63
Ndufaf4	17.0111	1.22994e-62
Krt14	-17.3425	4.83048e-62
Rbm15	15.3299	3.33887e-60
Hdgf	-17.0438	1.02555e-59
Uqcrq	16.9803	4.03341e-59
Med29	16.4213	1.57839e-57
Nt5dc2	-16.8557	1.61129e-57
Uqcr10	16.7313	1.90384e-57
Ythdf2	16.1606	9.80633e-57
Rbmxl1	16.2889	4.04889e-55
Gpatch4	15.9208	1.00748e-54
Ass1	-16.3621	1.47422e-54
D8Ertd738e	16.2248	4.33429e-54
Cdkn1c	-11.8117	4.70027e-54
Rpl4	-15.9521	2.82303e-52
Dph3	15.6062	6.08596e-52
Anxa2	-15.8312	9.26232e-52
Pelo	15.1007	3.18218e-51
Naca	-15.7343	7.09204e-51
Npm1	-15.7251	8.03765e-51
Eif1a	15.2864	2.87223e-50
Emc6	15.316	2.91392e-50
Ccdc59	15.3878	4.64292e-50
Arf6	15.3297	5.02091e-50
Polr1d	15.5697	8.4449e-50
Tst	15.2461	1.76016e-49
Mrps12	14.8567	1.75956e-48
Rpl14	-15.3462	1.97186e-48
1700021F05Rik	14.9385	2.24867e-48
Rpl3	-15.2649	2.65891e-48
Trp53	-15.4095	3.00697e-48
Mad2l1bp	14.0238	5.87438e-48
Eif3k	-15.1457	2.50041e-47
Avpi1	15.0151	5.72908e-47
Cct4	-15.1885	6.3028e-47
Itm2b	-14.7657	2.99442e-45
Cbr2	-14.7401	3.91509e-45
Cygb	-14.1964	7.02601e-45
Cox8a	14.7052	1.54788e-44
Imp3	14.5268	2.58785e-44
Uqcrfs1	14.5265	2.60404e-44
Sap30bp	14.0691	3.1826e-44
Gltscr2	-14.5042	3.41979e-44
BC005561	14.1587	8.80152e-44
Rnh1	-14.6453	1.896e-43
Mrps24	14.1471	9.0755e-43
Kif21a	-14.5465	1.05492e-42
Bola2	14.0074	2.73851e-42
Exosc4	14.1159	3.04337e-42
Odc1	-14.4876	5.16738e-42
Rps6	-14.1292	2.45163e-41
Med21	14.0215	4.33328e-41
Rpp38	12.9882	4.33328e-41
H3f3b	-14.043	1.35489e-40
Rps3a1	-14.0094	2.10979e-40
Atp5f1	-13.824	2.37577e-40
Pdlim1	-14.0066	4.01726e-40
BC100530	-10.6288	4.11132e-40
Fam32a	13.6122	5.58539e-40
Tbcc	13.3081	1.07951e-39
Phgdh	-13.9081	1.91216e-39
Mrpl50	13.6584	3.07481e-39
Mrto4	13.4474	3.08866e-39
Cox6a1	13.6458	9.94695e-39
Atg101	13.291	1.08378e-38
Bmyc	13.3055	1.69451e-38
Ywhah	13.5176	1.81568e-38
Snrpb2	13.5778	1.99058e-38
Son	13.5483	3.5395e-38
Wdr18	13.1668	6.02937e-38
Mrps33	13.4407	1.10729e-37
Rpl23a	13.2666	1.22019e-37
Lmna	-13.3759	1.36558e-37
Mrpl12	13.3073	1.74994e-37
C1qbp	13.4403	1.82931e-37
Rgs2	-12.3369	2.07674e-37
Ndufaf1	12.7399	2.79322e-37
Ptov1	-13.1085	3.00413e-37
Tpt1	-13.4271	3.75828e-37
Rpl7	-13.3493	1.01867e-36
Coa3	13.0528	1.45571e-36
Rpl22l1	-13.2708	1.94067e-36
Smim15	13.0284	2.26325e-36
Rpl18	-13.2571	3.23024e-36
Timm17a	13.0112	5.23072e-36
Eif3e	-13.1653	1.00217e-35
Grpel1	12.7726	1.31595e-34
Pycard	12.7613	1.72725e-34
Mrpl20	12.8555	1.9458e-34
Uqcr11	12.8811	3.19153e-34
Timm13	12.4801	6.50111e-34
Gemin6	12.3152	1.08203e-33
Mrpl34	12.6743	1.18291e-33
Trim29	-12.6144	1.23577e-33
Mrpl57	12.6028	3.52364e-33
Tmem238	12.1123	1.22864e-32
Dynlrb1	-12.5434	2.68903e-32
Znhit2	12.0272	5.48326e-32
Pgp	11.9729	1.19714e-31
Zfp292	11.8704	1.22599e-31
Nck1	11.8568	1.75793e-31
Gnb2	-12.3877	2.5402e-31
Hist1h2bc	-10.9628	2.78196e-31
Cox7c	12.227	6.94963e-31
Knop1	12.1227	1.01433e-30
Anxa1	-12.2583	1.47991e-30
Hnrnpa1	-12.1148	2.9042e-30
Mrpl16	11.7445	3.13889e-30
Ppp1ca	-12.1366	3.65878e-30
Eif3f	-11.9941	4.04765e-30
Ybx1	-11.9451	4.5155e-30
Gdi2	-12.1242	6.35904e-30
2410016O06Rik	11.2577	8.35306e-30
Rp9	11.8171	8.66086e-30
Atxn10	-12.1407	1.44186e-29
H3f3a	-11.9354	1.78351e-29
Cdc26	11.287	1.81018e-29
Cdk4	-11.9394	2.91112e-29
Anapc5	-11.8211	4.07526e-29
Fam213a	-11.9336	4.07526e-29
Sac3d1	11.5371	4.10035e-29
Ppic	-11.9752	5.22353e-29
Cox6c	11.7484	8.14204e-29
Stfa1	-9.9694	8.67547e-29
Gapdh	-11.59	1.00768e-28
Rpl5	-11.733	1.24081e-28
Atp5c1	-11.7747	1.25984e-28
Pabpc1	-11.6458	1.45024e-28
Ccnd3	-11.8911	2.02771e-28
Psmc4	-11.8211	2.23385e-28
Mbd2	-11.7251	2.62117e-28
Set	-11.6901	2.97975e-28
Shfm1	11.5076	3.82709e-28
Mrpl54	11.6297	4.85982e-28
Ywhae	-11.6612	4.9801e-28
Mtch1	-11.8189	5.68708e-28
Rhog	11.1672	7.94698e-28
Basp1	11.05	8.16929e-28
Rps5	-11.5793	1.3301e-27
Nudt2	11.1911	1.39092e-27
Eef1b2	-11.4999	2.06416e-27
Hmox2	11.1382	2.26049e-27
Mrps6	11.1937	4.41972e-27
Rabac1	-11.3378	5.98957e-27
Tsc22d1	-11.459	8.26288e-27
Mrps21	11.3845	8.73024e-27
Reep5	-11.5158	9.03899e-27
Cope	-11.4812	9.34074e-27
Luzp1	11.3096	9.87022e-27
H2afy	-11.4625	1.07769e-26
Glrx3	-11.4569	1.20494e-26
Prr7	10.6212	1.29846e-26
Abt1	10.9181	2.07123e-26
Gcat	-11.3661	2.39961e-26
Tk1	10.9937	2.84725e-26
Nhp2	11.2632	2.85554e-26
Rpl38	11.2297	5.01103e-26
Cct5	-11.28	5.61371e-26
Srp19	11.0343	5.75468e-26
Arhgdib	-11.2916	6.9506e-26
Nup50	10.8055	6.9506e-26
Etfb	-11.2995	7.85575e-26
Psmb6	-11.1382	7.85575e-26
Fxn	10.8817	8.19354e-26
H2afx	-10.861	1.06651e-25
Mrps7	10.949	1.11405e-25
Pcbp2	-11.1196	1.82343e-25
Hmgn2	11.0099	2.2247e-25
Fam83d	10.3606	2.70526e-25
Tecr	-10.9747	3.21023e-25
Atp5a1	-10.9975	5.06251e-25
Spr	10.7962	5.84359e-25
2310036O22Rik	10.9703	6.20359e-25
Dctpp1	10.8966	6.35989e-25
Eif5a	-10.9882	7.14647e-25
Lancl1	-11.2435	7.14647e-25
Eif4h	-11.0216	1.10327e-24
Rpl10a	-10.8596	2.85255e-24
Rps3	-10.8578	2.89491e-24
Tssc4	10.574	2.99035e-24
Nudt19	10.6003	3.06057e-24
Rpl17	-10.8515	3.06057e-24
Trappc5	10.5805	5.44122e-24
Eif3c	-10.8377	6.10574e-24
Psmd7	10.7094	7.19919e-24
Med7	10.4267	1.12981e-23
Ccdc85b	10.0073	1.2513e-23
Fth1	-10.6461	1.25496e-23
Ntmt1	10.4419	1.33761e-23
Gemin7	10.2904	1.46566e-23
Rbfa	10.4529	1.61363e-23
Chchd4	10.4381	2.0357e-23
Eci2	-10.8389	2.08836e-23
Luc7l2	-10.5873	2.15399e-23
Pkp3	-10.7843	2.28997e-23
Slc38a4	-10.805	3.33756e-23
Gtf2h5	10.5663	3.52291e-23
Cct2	-10.5427	3.75809e-23
Ndufb10	-10.6152	4.02518e-23
Plin3	-10.8005	4.27311e-23
Eif3h	-10.5252	5.0942e-23
Eid1	-10.7461	5.53611e-23
Anapc15	10.285	5.61297e-23
Cebpb	10.0935	1.19772e-22
Impdh2	-10.5738	1.21362e-22
Umps	10.1995	1.29448e-22
Ubxn1	-10.5132	1.3809e-22
Top2a	-2.93949	1.55049e-22
Myeov2	10.4307	1.64763e-22
Defb1	9.56486	1.79937e-22
Rps13	-10.4237	2.33475e-22
Cox19	10.2714	2.34556e-22
Gnas	-10.3445	2.34556e-22
AU022252	9.98156	2.41488e-22
Mrps17	10.2656	2.54957e-22
Fkbpl	9.75211	2.77295e-22
Dusp14	10.1299	2.83776e-22
Rps27	10.1713	2.83776e-22
Utp3	10.2916	3.01705e-22
Prpf19	-10.4241	4.04578e-22
Mrpl15	10.189	4.25666e-22
Phospho2	9.89181	4.3919e-22
Tnrc6c	9.82931	5.27338e-22
Spink8	-10.0143	5.45048e-22
Ly6e	9.6819	5.60865e-22
Tmsb10	10.305	5.81547e-22
Mdh1	-10.0179	6.13892e-22
Mplkip	-10.4599	7.32844e-22
Itm2c	-10.4073	7.84919e-22
Clp1	9.6623	9.00583e-22
Acaa2	-10.0897	9.21745e-22
Postn	-9.9327	1.90426e-21
Zfp771	9.97708	2.20582e-21
Rps7	10.0731	2.58257e-21
Ost4	10.051	2.66389e-21
Hes1	8.24979	2.68816e-21
Rpl13a	-10.1519	3.26249e-21
H2afj	10.1302	3.32308e-21
Ldhb	-10.1037	3.32455e-21
Pus1	9.51111	3.89852e-21
Manf	9.96289	5.01871e-21
Chchd5	9.71529	5.75643e-21
0610037L13Rik	9.87304	5.96174e-21
Dek	-9.79572	6.30411e-21
Fkbp4	-9.98847	7.83703e-21
Pitpna	-10.0484	9.02533e-21
Pebp1	-9.87992	9.23329e-21
Ube2d3	-9.95071	9.94562e-21
Bola1	9.8111	1.02814e-20
Ythdc1	9.90888	1.09113e-20
Oser1	9.78419	1.11521e-20
Snapc5	9.67135	1.24011e-20
Rps20	-9.99527	1.44031e-20
Birc5	9.31546	1.46322e-20
Zfp593	9.76051	1.55477e-20
2210016L21Rik	-10.2131	1.5804e-20
Glrx5	9.88074	1.66223e-20
Eif3m	-9.96691	1.92341e-20
Spin1	9.759	2.03424e-20
Cbr1	9.77389	2.18823e-20
Raly	-9.97184	2.3911e-20
Polr2m	-9.99471	2.51903e-20
Ddb1	-10.0287	2.56299e-20
Slc3a2	-9.99128	2.81154e-20
Rps18	-9.91937	2.91394e-20
Tgif1	9.46545	2.97943e-20
Anxa5	-9.74517	3.53228e-20
Apoc1	-9.00517	5.00117e-20
Mrps25	9.74759	5.10902e-20
Timm10	9.68347	5.5631e-20
Lysmd2	9.37198	1.52423e-19
Nasp	-9.72037	1.58415e-19
Eif3g	-9.78753	1.75202e-19
Hspa1b	9.25641	1.77805e-19
Cyc1	-9.55305	1.78863e-19
A430005L14Rik	9.48773	1.86727e-19
Igfbp2	-8.39111	1.94337e-19
1810058I24Rik	9.67541	2.23382e-19
Atp5k	9.67099	2.68338e-19
Kti12	9.44697	2.69223e-19
Psmd8	-9.73564	2.72077e-19
Arpp19	-9.42957	3.5272e-19
Mrpl27	9.47254	3.61209e-19
Pafah1b3	-9.65982	3.90677e-19
Rpl23	-9.6362	4.15232e-19
Vangl1	9.13754	4.41813e-19
Tradd	9.24962	4.76734e-19
Snrpg	9.58508	6.51974e-19
Cd9	-9.57504	7.1024e-19
Atp5b	-9.41538	8.94485e-19
Etfa	-9.58512	1.36514e-18
Fabp5	-9.06305	1.45001e-18
Rps17	-9.49781	1.48115e-18
Rps19	-9.49784	1.48115e-18
Perp	-9.29319	1.56188e-18
Smarcd2	-9.25226	1.71807e-18
Rrp15	9.2279	1.95423e-18
Sf3b2	-8.46624	2.39447e-18
Magoh	9.42752	2.42919e-18
Bag5	9.11525	2.62687e-18
Rps14	-9.43192	2.68226e-18
Gm561	9.17559	3.03879e-18
Eif4e2	-9.52129	3.16404e-18
Dstn	-9.22304	3.23201e-18
Aldh2	-9.41537	3.68314e-18
Fen1	9.20071	3.80039e-18
Rps8	-9.38756	3.96581e-18
Tmem70	9.24529	4.12674e-18
Mrpl36	9.33731	4.36462e-18
Thy1	-9.53016	4.62197e-18
Rps27rt	9.28643	4.71767e-18
Comt	9.10287	5.87763e-18
Pfdn5	9.31702	6.02669e-18
Rpl18a	-9.32424	6.95248e-18
Morf4l1	-9.28606	7.03667e-18
Fam210a	8.99616	7.47941e-18
Spsb2	8.54731	7.48001e-18
Mta2	-9.4482	7.52339e-18
Rps2	-9.30298	8.34156e-18
Rpl8	-9.18399	8.68942e-18
Srsf5	-9.13183	8.83397e-18
Mkks	9.03481	8.95402e-18
Cops3	-9.36958	1.06838e-17
Gtf3c6	9.15477	1.15808e-17
Bzw1	-9.12608	1.49634e-17
Usmg5	9.23206	1.51123e-17
Ddx24	8.82743	1.74357e-17
Sde2	9.02062	1.87965e-17
Med18	8.66516	1.90184e-17
Psma2	-9.20722	2.09277e-17
Vapa	-8.85482	2.28587e-17
0610012G03Rik	8.87324	2.42705e-17
Hspa1a	8.81521	2.485e-17
Nol12	8.89274	3.24334e-17
Rab11a	-9.02712	3.79625e-17
Mpnd	-9.2739	4.00362e-17
2810417H13Rik	-7.09103	4.04898e-17
Ivns1abp	-9.2273	5.27491e-17
Gpx4	-9.05285	5.50391e-17
Qars	-9.19011	5.82201e-17
Dynll2	9.00614	5.84858e-17
Eif4a1	-9.04206	5.99505e-17
Gimap9	8.49778	6.07767e-17
Ndnl2	8.68766	6.48848e-17
Acot1	8.72898	6.90934e-17
Tsfm	8.9017	7.16811e-17
Hmgn1	-9.0319	7.28464e-17
Vps33a	8.51978	7.46529e-17
Capns1	-8.9375	9.72469e-17
Snx17	-9.13458	1.22029e-16
Zmat2	8.95366	1.22029e-16
Cox14	8.97493	1.25194e-16
N4bp2l2	8.78427	1.52204e-16
Rab5c	-8.78871	1.55806e-16
Atp5e	8.89158	1.60193e-16
Mrps2	8.57936	1.70124e-16
Cyb5r3	-8.87079	1.9234e-16
Trim27	8.71165	2.20508e-16
Psmb4	-8.90208	2.35344e-16
Marcks	8.72249	2.66572e-16
Nxf1	8.80611	3.00622e-16
Pttg1	-7.71073	3.04947e-16
Scd2	8.5421	3.26566e-16
Txnl1	-8.9399	3.77939e-16
Mybpc1	-8.28506	3.80422e-16
Cotl1	-8.17902	4.02733e-16
Pthlh	5.98349	5.09106e-16
Wtap	5.04217	6.02556e-16
Gm13251	8.2418	6.41963e-16
Cct3	-8.55457	6.56021e-16
Cmc1	8.60551	7.13418e-16
Mat2b	-8.87048	7.97252e-16
Cdca4	8.60021	8.94702e-16
Sh3bp4	7.95032	1.03901e-15
Tfg	-8.78281	1.04969e-15
Lgals1	-7.51008	1.11303e-15
Smim20	-8.73441	1.18603e-15
Sco2	8.37224	1.32974e-15
Psmc3	-8.68327	1.49248e-15
Gfer	8.45889	1.54374e-15
Timm9	8.56258	1.63071e-15
Ufm1	8.5303	1.66436e-15
Rnmtl1	8.33926	1.92542e-15
Pck2	8.27913	2.12018e-15
Ydjc	8.2054	2.76256e-15
Oxct1	-8.37147	2.92805e-15
0610009B22Rik	8.48512	2.96956e-15
1500011K16Rik	8.37083	2.96967e-15
Eif6	-8.46061	3.09253e-15
Lypd6b	-8.6827	3.2074e-15
Psma6	-8.41587	3.2824e-15
Capg	-8.57014	3.30859e-15
2310009B15Rik	-8.76101	3.32314e-15
Sec62	8.5187	4.34011e-15
Capzb	-8.5891	4.38888e-15
Tigd2	8.37083	4.85654e-15
Gnai1	-8.54958	5.13232e-15
Ndufv2	-8.50763	5.31598e-15
Bloc1s4	8.26988	5.76505e-15
Ndfip2	-8.65766	6.24784e-15
Prelid1	-8.43606	6.30873e-15
Twistnb	8.38425	6.35622e-15
Sparc	-8.53606	6.57099e-15
Serpinb10	-6.77823	7.06215e-15
Rps10	-8.4934	8.10779e-15
Ywhaz	-8.5389	8.32166e-15
Nedd4	-8.4909	8.54364e-15
Ndufaf2	8.37766	9.17374e-15
Lmnb1	-8.5053	1.06147e-14
Rnf146	8.24256	1.17953e-14
Atp5o	-8.43648	1.20793e-14
Pkm	-8.31421	1.31028e-14
Rpl21	-8.42561	1.40098e-14
Mrps23	8.31045	1.45225e-14
Nudt7	7.91543	1.52528e-14
Irf2bp2	8.19818	1.57306e-14
Aldh3b2	-8.70325	1.58471e-14
Ppp2r1a	-8.48952	1.78082e-14
Rnf113a2	8.03029	1.87957e-14
Hoxc8	8.0062	2.15776e-14
Psmc5	-8.35146	2.24753e-14
Psph	-8.45814	2.25958e-14
Cct8	-8.34482	2.34956e-14
Use1	-8.37191	3.04321e-14
Nop16	7.89863	3.32528e-14
Bcl9l	8.03315	3.7351e-14
Tax1bp1	-8.13784	3.84956e-14
Ddx28	7.79036	4.53846e-14
Nt5c	7.9323	4.99376e-14
Gnai2	-8.32273	5.06251e-14
Ahcyl2	-8.36568	5.14316e-14
Micu1	-8.34133	5.14316e-14
Zfp637	7.97133	5.17196e-14
Ube2e1	-8.1162	5.1788e-14
Acp1	-8.06184	5.40924e-14
Nop2	8.02203	5.79435e-14
Dctn2	-8.29813	6.36585e-14
Ywhaq	-8.19899	6.58453e-14
Bsg	-8.20688	6.64445e-14
Mlf2	-8.30841	6.68277e-14
Fignl1	7.98478	7.86425e-14
Tmem132a	8.03834	8.35546e-14
Fkbp8	-7.96895	8.63566e-14
Lamtor4	8.13661	9.05607e-14
Vav3	-8.20059	1.46013e-13
Psmc6	-8.18387	1.4608e-13
Mrpl40	7.90418	1.59744e-13
Psmd6	-8.19033	1.64333e-13
Cdc37	-8.143	1.7648e-13
Hist3h2ba	-8.10094	1.82035e-13
Coa6	7.75468	1.88416e-13
Krtcap3	7.91416	1.99272e-13
Polr2k	8.0531	2.21851e-13
Rab38	7.96393	2.74806e-13
Sugt1	-7.76207	2.88869e-13
Rpl30	-7.9818	3.03429e-13
2300009A05Rik	7.78392	3.13534e-13
2010107E04Rik	7.9954	3.33802e-13
Anxa8	-8.08265	3.59097e-13
Fam136a	7.87942	3.59763e-13
Commd5	7.73865	3.63845e-13
Uchl3	-8.08559	3.70652e-13
Grwd1	7.78189	4.07644e-13
Slc31a2	-8.19593	4.14714e-13
Ppib	-7.93905	4.25078e-13
Khk	-8.01251	4.41683e-13
Vcp	-7.81109	4.78069e-13
Polr2h	7.90088	4.9598e-13
Lcmt2	7.4919	4.96633e-13
Tmed2	-7.9668	4.9924e-13
Ywhag	7.82757	5.46802e-13
Ndufa3	7.84712	6.07214e-13
Eif4b	-7.99766	6.28174e-13
Esd	-7.87071	6.39514e-13
Mcm6	-7.62161	6.46043e-13
Myl12b	7.67444	6.54357e-13
Mfsd5	7.65757	6.93938e-13
Ier5l	7.56184	7.01939e-13
Csta1	-6.76756	7.36639e-13
Cdc42	-7.64002	7.58309e-13
Ndufv3	7.59607	8.1815e-13
Agpat2	7.51846	8.508e-13
Tpbg	7.74207	9.03292e-13
Cd81	-7.93356	9.34591e-13
Lef1	-7.82877	9.48409e-13
Uqcrc2	-7.69474	9.57524e-13
Sf3b5	7.85193	9.91915e-13
Prdx2	-7.84461	1.1097e-12
Sgol1	7.60191	1.1097e-12
Hnrnpab	-7.85022	1.1156e-12
Commd2	7.3959	1.23747e-12
Pde12	7.60118	1.26968e-12
Orai1	7.54424	1.3094e-12
Trim59	7.57837	1.33349e-12
Smarcb1	-7.48027	1.34472e-12
Ip6k2	-7.87751	1.38526e-12
Hspd1	7.81567	1.47452e-12
Trim13	7.44081	1.47524e-12
Degs1	7.64937	1.54343e-12
Tubb4b	7.78801	1.57505e-12
Cmc2	7.12547	1.64042e-12
Ssbp2	-7.64724	1.66584e-12
Cald1	6.61191	1.68397e-12
L3hypdh	7.49304	1.74044e-12
Ckb	-7.80714	1.87273e-12
Tmem261	7.7276	2.00419e-12
Fbxl5	7.5364	2.03089e-12
Nudt1	7.66447	2.11226e-12
Dyrk3	7.25584	2.21529e-12
Snn	-7.78051	2.28512e-12
Hagh	-7.83458	2.28759e-12
Timm8b	7.66892	2.41093e-12
Asb8	7.47879	2.49198e-12
Deb1	7.59366	2.51794e-12
Hdac5	-7.94124	2.72367e-12
Tmco1	-7.81721	2.72367e-12
Abracl	7.73203	2.74492e-12
Casc5	7.34909	3.03525e-12
Topors	7.54443	3.05047e-12
2700060E02Rik	-7.67757	3.27459e-12
Reep3	-7.75065	3.62879e-12
Nfkbia	-7.51252	3.68841e-12
Hyal2	7.51524	3.88984e-12
Ap2m1	-7.75526	3.9469e-12
Gria2	-7.67467	4.14124e-12
Klc3	-7.79587	4.32765e-12
Pprc1	7.22938	4.85079e-12
Mtch2	-7.42018	5.23246e-12
Mpc1	-7.65389	5.34168e-12
Mxd4	-7.79649	5.57387e-12
Ndufb9	-7.60226	6.25385e-12
Mdh2	-7.62625	6.59508e-12
Srp54b	-7.68403	6.81437e-12
Fgfbp1	7.44158	6.86356e-12
Gmps	-7.69331	6.98083e-12
Tubb6	7.2556	7.37103e-12
Hoxa7	7.39765	7.56529e-12
Hoxb8	7.32925	7.75927e-12
Cetn3	-7.60727	8.25747e-12
Capza2	-7.55492	8.61258e-12
Ankrd54	-7.70919	9.05017e-12
Pdgfa	-7.59211	9.20055e-12
Sdhb	-7.60117	9.61057e-12
Actr10	-7.5746	1.02729e-11
Mrps28	7.15526	1.03257e-11
Tspan3	-7.2568	1.03553e-11
Hist1h2ap	7.10063	1.07065e-11
Cst3	-7.3368	1.08519e-11
Sec61g	7.42782	1.09661e-11
Ptges	-7.73793	1.14275e-11
Ccnd1	6.40758	1.17866e-11
Med28	7.48658	1.20131e-11
Mrpl19	7.40251	1.20131e-11
Guk1	7.43414	1.22233e-11
Med11	7.34465	1.22886e-11
Med9	7.41043	1.24009e-11
Xrn2	-7.55594	1.25289e-11
Mthfd1	-7.61495	1.26342e-11
Fam92a	-7.56644	1.36682e-11
S100a16	-7.2567	1.38838e-11
Dnpep	-7.57045	1.42504e-11
Wdr55	7.26174	1.46512e-11
Psmc2	-7.57889	1.48888e-11
Pgam1	-7.48731	1.63943e-11
Trmt5	6.93794	1.70257e-11
Eno1	7.30848	1.83668e-11
Efcab1	-7.74707	1.84744e-11
Pop5	7.41741	1.87435e-11
Vdac1	-7.48434	2.02949e-11
Tnfaip8l1	6.81476	2.04904e-11
Psma7	-7.44279	2.17135e-11
1110008P14Rik	7.23274	2.46919e-11
Rhoa	-7.37827	2.60459e-11
Pih1d1	-7.35122	2.67152e-11
Ybx3	-7.41045	2.9523e-11
Rpl36	7.40256	3.07143e-11
Fam110a	6.99647	3.10306e-11
Cox7a2l	6.87052	3.29205e-11
Rps9	-7.38986	3.35584e-11
Cyb5b	7.24381	3.51235e-11
Vamp8	7.13812	3.56704e-11
Nif3l1	7.1922	3.6231e-11
Cdc34	7.27537	3.68051e-11
Psmb1	-7.37032	3.75402e-11
S100a14	-6.15472	3.75402e-11
Gtf3a	-7.43588	3.98963e-11
Yae1d1	7.22783	4.00443e-11
Mgst1	6.67488	4.07711e-11
Cltb	-5.49424	4.36428e-11
Cct7	-7.1931	4.47537e-11
Psme2	-7.4292	4.6232e-11
Pcbp1	7.29897	4.6431e-11
Pramef8	6.85702	4.72471e-11
Rsrp1	-7.32272	4.88932e-11
2410015M20Rik	7.24556	5.12109e-11
Npc2	-7.31555	5.32078e-11
Eif3i	-7.32692	5.42868e-11
Tmem248	7.06111	5.42868e-11
Marcksl1	7.26405	5.43683e-11
Htra1	7.1391	5.44859e-11
Trappc3	7.25001	5.52209e-11
Arhgap5	7.20669	6.14464e-11
Kcnq1ot1	7.2231	6.15692e-11
Nudt21	-7.25375	6.16485e-11
Endog	6.96098	6.24983e-11
A730017C20Rik	-6.79239	6.41022e-11
Mcts2	7.11989	6.41022e-11
Ndufa11	-7.16506	6.56183e-11
Ppdpf	7.24756	6.70753e-11
Trappc6a	-7.24688	6.88264e-11
Cdca5	6.59723	6.90977e-11
Mrpl23	-6.91448	7.50649e-11
Tkt	-7.26464	7.51644e-11
Apoe	-6.82358	7.53015e-11
Arl4a	7.09185	8.09938e-11
Hadh	-7.3052	8.46866e-11
Hr	6.65461	8.72922e-11
Pou3f1	6.27893	9.32782e-11
Bmp7	-6.89301	1.19483e-10
Snx5	-7.22587	1.20405e-10
Polr2a	-7.29254	1.2419e-10
Hsph1	7.0072	1.3813e-10
Pdia4	7.0812	1.40742e-10
Rfc4	-7.28353	1.48487e-10
Pole3	6.61591	1.53044e-10
Aimp1	-7.14356	1.5328e-10
Rnf10	-7.22002	1.5328e-10
Rab14	-6.67921	1.55982e-10
Sh3glb2	-7.2657	1.66982e-10
Hdhd3	6.6975	1.6785e-10
Hnrnpll	-7.25764	1.7725e-10
Gnmt	-7.38771	1.77781e-10
Psap	-7.14816	1.91847e-10
Btbd2	-7.27472	2.10586e-10
Tbrg1	-7.1029	2.24765e-10
2510002D24Rik	-7.20507	2.31049e-10
Gstp1	6.72091	2.38155e-10
Atg3	-7.14246	2.39643e-10
Chpf	6.66618	2.49968e-10
Lsm3	6.62867	2.71928e-10
Adh5	-7.12719	2.85475e-10
Uchl5	-6.93603	2.86177e-10
Slc25a51	6.94554	3.35633e-10
Mfhas1	-6.84035	3.51775e-10
Mis12	6.8542	3.60128e-10
Ube2b	-7.04783	3.70726e-10
Rpl28	-7.03451	3.80506e-10
Dpf2	-7.11866	3.94049e-10
Egr1	-7.03307	3.99876e-10
Mff	-7.05364	4.16021e-10
U2af1	-6.99138	4.17718e-10
Rnaseh2b	-7.08989	4.79776e-10
Akr1a1	-6.63447	4.90795e-10
Gtf2i	-7.06474	4.97153e-10
Ascc1	-7.09824	4.99122e-10
Fjx1	-7.1228	4.99122e-10
Zcchc17	6.93047	5.00647e-10
Zwint	-6.9826	5.21848e-10
Nat2	6.51075	5.66452e-10
Lrrc59	-6.839	6.04433e-10
Psmd4	-6.90767	6.13338e-10
Mrpl17	6.76791	6.73374e-10
Cxcl1	-6.60058	7.07233e-10
Serpinb7	-5.2209	7.07233e-10
Usp50	6.65228	7.10763e-10
Ppp3ca	-6.74552	7.15696e-10
Zfp385a	-6.89165	7.34241e-10
Ddit4	6.57967	7.40674e-10
Acer2	6.36104	7.51214e-10
Ifitm3	6.68342	7.58589e-10
Nusap1	-5.2688	7.58589e-10
Smarca4	-6.88085	7.71843e-10
Aars	6.28796	9.0752e-10
Phlda2	6.35619	9.0801e-10
Hdac1	-6.89168	9.87983e-10
Ece2	6.66214	1.03129e-09
Gnb1l	6.57877	1.03434e-09
Bhlhe40	6.3494	1.05498e-09
Etf1	-6.92445	1.07572e-09
Polr1b	6.5749	1.13151e-09
Rps21	6.85901	1.13312e-09
Trmt10c	6.71802	1.14912e-09
Msmo1	6.49827	1.19568e-09
Gpn2	6.56086	1.23843e-09
Det1	6.5496	1.27617e-09
Smco4	6.73319	1.28759e-09
Lsm11	6.62238	1.31947e-09
BC003965	6.78147	1.37334e-09
Rps11	-6.83698	1.39342e-09
Timm10b	6.76228	1.4512e-09
Setd1b	5.90775	1.45391e-09
Ash1l	6.75249	1.45704e-09
Smarcc1	-6.86525	1.50311e-09
Rnf187	-6.58108	1.55372e-09
Sdha	-6.87897	1.5893e-09
Urod	-6.74147	1.59554e-09
Zfp579	6.55557	1.59554e-09
Psmb5	-6.46288	1.65413e-09
Ddx18	6.56172	1.67061e-09
Sf3b6	-6.4692	1.71409e-09
3010026O09Rik	6.54298	1.80945e-09
Phf5a	6.72328	1.87548e-09
Mrpl33	6.71934	1.88774e-09
Hnrnpk	-6.74801	1.9497e-09
Hoxb9	5.95634	2.07237e-09
Cdh1	6.06854	2.11755e-09
Sgta	-6.5938	2.16506e-09
Ryk	-6.80379	2.17435e-09
Rps26	-6.76618	2.18758e-09
Pltp	-6.72167	2.19135e-09
Mapk13	-6.63267	2.34495e-09
Rab2a	-6.77312	2.4142e-09
Prss23	6.62776	2.47282e-09
Cox4i1	-6.37043	2.55106e-09
Tomm20	-6.73759	2.63982e-09
Psmd1	-6.79915	2.64303e-09
Ddx5	-6.5675	2.68122e-09
Cops5	-6.6575	2.70181e-09
Ppp4r2	6.36595	2.85629e-09
Lamtor2	6.71112	2.88648e-09
Nat6	6.44528	3.0115e-09
Krcc1	6.58095	3.01456e-09
Fkbp3	-6.69316	3.0291e-09
Serpinb5	-6.2907	3.3176e-09
Tprgl	-6.80155	3.38447e-09
Fbln1	6.63386	3.9319e-09
Metrnl	6.21368	4.16206e-09
Phb	-6.74995	4.28058e-09
Kif26a	6.27945	4.32512e-09
Slc16a3	5.81297	4.38065e-09
Rac1	-6.66117	4.45121e-09
Gsto1	-6.62419	5.01674e-09
Gars	-6.72926	5.11019e-09
Ugp2	-6.47277	5.11019e-09
Ube2v2	6.54696	5.12167e-09
Leprotl1	6.38288	5.31969e-09
Rbm42	-6.69112	5.50955e-09
Eef2	-5.9939	5.56725e-09
Tfap2a	6.46374	6.25304e-09
Mrpl44	6.48617	6.58359e-09
Rps19bp1	6.53299	6.78106e-09
Rnaseh2c	6.53724	7.21747e-09
Tnfaip8	6.44354	7.3387e-09
Slc7a5	-6.58242	7.8548e-09
Bcl11a	6.43904	7.90326e-09
Dazap1	-6.47057	7.94017e-09
Ccnl2	6.39615	8.38816e-09
Ash2l	-6.65022	8.6948e-09
Bnip1	6.23681	8.79776e-09
Hspa5	6.51645	8.84658e-09
Rpl19	-6.54054	9.14423e-09
Selenbp1	-6.30277	9.35381e-09
Tomm6	6.17888	9.43822e-09
Tmem97	6.22367	1.05544e-08
2810004N23Rik	6.37426	1.12527e-08
Ninj1	6.34372	1.20417e-08
Rpl12	-6.49456	1.21947e-08
Commd3	-5.99464	1.23121e-08
Sra1	6.40814	1.25204e-08
Gas6	-6.34201	1.27661e-08
Stoml2	-6.5198	1.30057e-08
Hebp1	6.22473	1.30306e-08
Cth	-6.59258	1.30615e-08
Ndufa10	-6.26377	1.33528e-08
Ndufs2	-6.42892	1.34971e-08
Rps27l	6.21934	1.378e-08
Rab7	-6.46191	1.41057e-08
Cisd2	-6.48083	1.42151e-08
Dap3	-6.52738	1.43664e-08
Oard1	-6.52051	1.44186e-08
Atf5	-6.59614	1.45435e-08
Armc1	6.26196	1.45809e-08
Bola3	6.35762	1.45809e-08
Tnfrsf21	6.12572	1.45842e-08
Ufsp1	5.76847	1.50647e-08
Actr3	-6.44602	1.63917e-08
Grpel2	6.31071	1.6702e-08
Dnajb4	6.29691	1.69871e-08
Mrpl55	6.35912	1.71929e-08
Smim4	-6.52824	1.8338e-08
Atp5g1	-6.41215	1.8913e-08
Jup	-5.89991	1.98453e-08
Cttn	-6.45938	1.98892e-08
Msantd3	6.15235	2.13225e-08
Brf2	6.02443	2.14221e-08
Trim28	-6.39602	2.27894e-08
Bmp2	-6.16756	2.37746e-08
Rchy1	-6.40025	2.48876e-08
Xrcc1	-6.46769	2.54822e-08
Fam216a	-6.47458	2.63565e-08
Prpf40a	-6.2443	2.68418e-08
Mpc2	-6.01724	2.78956e-08
Pinx1	5.85317	2.8085e-08
Cbr3	6.20289	2.89657e-08
Ddx20	6.18628	2.91542e-08
Tefm	6.09477	2.98485e-08
0610010K14Rik	6.20549	3.01572e-08
Hoxa1	6.10615	3.01658e-08
Cenpl	6.09914	3.03032e-08
Dcn	-5.84065	3.1565e-08
Kctd1	6.15715	3.26793e-08
Gpr89	6.14027	3.40759e-08
Utp11l	-6.35816	3.46094e-08
Ier2	-6.33284	3.63326e-08
1700008J07Rik	-6.31737	3.67234e-08
Arhgdia	-6.34397	3.75721e-08
Pigp	-6.18146	3.80908e-08
Celf2	-6.05202	3.94975e-08
Fbxo36	5.53997	3.94975e-08
Suclg1	-6.32662	4.03383e-08
Rbms2	6.20492	4.07551e-08
Gbas	-6.39094	4.1058e-08
Usp10	6.17209	4.11522e-08
Rtn4	-6.31632	4.16277e-08
Ndufa12	6.25499	4.2809e-08
Ddx1	-6.09454	4.48844e-08
Zdhhc3	6.01882	4.56354e-08
Emb	-6.01033	4.60091e-08
Vsnl1	5.8284	4.86005e-08
Taf11	6.17684	4.93272e-08
Rbm7	5.93274	4.94203e-08
Ccdc51	5.97801	5.04114e-08
Ezh2	-6.25387	5.04734e-08
Naa30	6.05974	5.04734e-08
Mki67	5.60468	5.04735e-08
Lmo1	-5.6837	5.51561e-08
Copg2	-6.09626	5.84225e-08
Hmgn3	6.17538	5.90123e-08
Cd2bp2	5.89495	5.92303e-08
Shisa5	-6.05438	6.12675e-08
Zfp442	5.94552	6.17714e-08
Hnrnpa0	5.67137	6.19542e-08
Nap1l4	-6.23339	6.19998e-08
Wnt10a	5.67627	6.28051e-08
AW209491	6.04149	6.63881e-08
Hnrnpr	6.10146	6.67745e-08
Nnt	-5.97276	6.88452e-08
Psmc1	-6.15392	7.80066e-08
Rnf114	-6.27352	7.88953e-08
Fbxo5	5.9892	7.89626e-08
Sypl	-6.17383	8.05709e-08
Hoxa5	6.08128	8.11462e-08
Chic2	-5.48464	8.12651e-08
Dctn1	-6.28661	8.22935e-08
Smarca2	-6.04718	8.28612e-08
Nit2	-6.23136	8.44105e-08
Ppp1r14b	5.74393	8.44262e-08
Klhl9	6.00713	8.58375e-08
Tmem256	5.94466	8.59687e-08
Chd3	5.7438	8.64901e-08
Sephs1	5.38419	8.8727e-08
Cops6	-5.92804	8.92035e-08
Sft2d3	-6.28789	9.01548e-08
Elof1	6.11983	9.31223e-08
Arl2	6.02166	9.55301e-08
Fxr1	-6.0017	9.55301e-08
Tor1aip2	-6.21337	9.55301e-08
Lpl	5.78619	9.7663e-08
Zswim1	5.8707	1.00176e-07
2810474O19Rik	6.0022	1.02096e-07
Eid2b	5.71034	1.03016e-07
Tpd52	-6.09838	1.03016e-07
Ccdc71	6.0107	1.03955e-07
Haus3	5.91166	1.08444e-07
Bzw2	-5.93837	1.08625e-07
Ift74	-6.23234	1.11705e-07
Tmem123	-5.93107	1.13428e-07
Ppp1cc	-5.96174	1.13685e-07
Klhdc4	5.97469	1.15495e-07
Mapk1ip1l	5.91924	1.15619e-07
Mdk	5.89224	1.17141e-07
Tmem203	5.94953	1.1828e-07
Ctbp1	-6.09976	1.19637e-07
Eif1b	5.98394	1.19698e-07
Ndufb4	-6.10301	1.20218e-07
Tstd1	5.18162	1.20928e-07
Ptp4a1	6.01642	1.23734e-07
Nup62	5.9615	1.30432e-07
Psmb7	-6.10053	1.31626e-07
Nsa2	-6.02236	1.31937e-07
Exo1	5.91494	1.32212e-07
Ewsr1	-5.93078	1.39089e-07
Mcm4	-6.14993	1.42186e-07
Cox6b1	6.07301	1.44856e-07
Mettl3	-6.00423	1.44856e-07
Nenf	5.99237	1.47602e-07
Rpl7a	5.88477	1.51458e-07
Zc3h13	5.2677	1.53933e-07
Thumpd1	5.9442	1.56526e-07
Cenpf	5.13088	1.57363e-07
Champ1	5.85828	1.57619e-07
Gar1	5.99372	1.58253e-07
Txn1	6.05343	1.59232e-07
Katna1	-6.09897	1.69896e-07
Calm4	5.61804	1.72685e-07
Nudt18	5.83998	1.72685e-07
Cbll1	5.86625	1.75959e-07
Alyref	-6.03754	1.78125e-07
Ssr2	-6.00479	1.79077e-07
Tmem100	5.64915	1.94702e-07
Uhrf1	-6.05713	1.97478e-07
Slbp	-5.82032	1.97674e-07
Gsr	-5.92038	2.03451e-07
Usp34	-6.03568	2.10282e-07
Nfe2l2	5.7708	2.19533e-07
Uba2	-6.0382	2.20387e-07
Dguok	-6.0502	2.26526e-07
Polr2j	5.69976	2.26661e-07
H19	-5.98271	2.28846e-07
Tomm22	5.94115	2.3518e-07
Htatip2	5.62302	2.38581e-07
Tpst2	5.83732	2.41388e-07
Rpsa	-5.97593	2.53788e-07
Ces2g	-5.98189	2.58358e-07
Rfc3	-6.01369	2.65305e-07
Cebpg	5.88175	2.77706e-07
Manbal	-5.57622	2.79054e-07
Znhit6	5.83574	2.88e-07
Ngrn	5.68408	2.88932e-07
Farsb	-5.70986	2.96785e-07
Ppp2r5c	-5.99386	2.96785e-07
Pdcd5	-5.75309	3.00357e-07
Cks2	4.29802	3.11291e-07
Bysl	5.78993	3.11417e-07
Ubac2	-5.78443	3.11493e-07
Ndufv1	-5.98938	3.11742e-07
Wdr53	5.60355	3.17332e-07
Calm5	4.92646	3.21675e-07
Rassf1	-5.86117	3.21675e-07
Sssca1	5.85799	3.28126e-07
Gjb3	5.6054	3.50322e-07
Dbf4	5.35365	3.54217e-07
Sephs2	5.80012	3.70676e-07
Gtf2a2	5.76569	3.83389e-07
Gm20604	-5.8178	3.93842e-07
Gtf2f2	5.79577	3.94155e-07
Phf23	5.7218	3.95624e-07
Plekhj1	5.86363	4.0552e-07
Gata3	-5.85649	4.1168e-07
Phyhip	5.5838	4.14327e-07
Adk	-5.93022	4.18019e-07
Dsc3	5.64042	4.18019e-07
Fam168b	-5.86719	4.309e-07
Chac2	5.6643	4.41844e-07
Kbtbd4	5.65547	4.50583e-07
Prpf38a	-5.90708	4.51604e-07
Rsu1	-5.92907	4.62023e-07
Ube2j2	5.50936	4.75794e-07
Gyg	-5.97029	4.75967e-07
Atp6v1e1	-5.9061	4.86862e-07
Dnajc8	-5.21623	4.92418e-07
Abhd13	5.65151	5.01801e-07
Pvrl2	5.70399	5.0187e-07
Arl1	-5.80535	5.06361e-07
Clu	-5.33998	5.12662e-07
Zfp64	5.78254	5.20202e-07
Msl1	5.75497	5.25858e-07
Prkaca	-5.94943	5.26158e-07
Lypla1	-5.68278	5.30835e-07
Ddx39	-5.46086	5.35619e-07
Myl6	-5.7774	5.59049e-07
Psmb3	-5.49859	5.64042e-07
Psmb2	-5.80629	5.64512e-07
Igfbp3	-5.08535	5.77141e-07
Fam173a	5.7617	5.87596e-07
Casp8ap2	5.71344	5.89858e-07
Ckap4	5.68971	6.22358e-07
Fam207a	5.39585	6.22358e-07
Hspg2	5.72301	6.29063e-07
Arpc2	-5.77983	6.32604e-07
Phlda3	5.65112	6.80401e-07
Rbm48	5.50421	6.89379e-07
Fam162a	-5.51651	6.91941e-07
Paics	-5.75424	7.0122e-07
Snrpf	5.7657	7.04892e-07
Prmt1	-5.76141	7.24395e-07
Asprv1	4.33819	7.24667e-07
Ak6	5.73115	7.45378e-07
Cfl1	-5.74485	7.46293e-07
Pafah1b1	-5.82672	7.60782e-07
Atic	-5.80454	7.62655e-07
Rab20	5.43664	7.62655e-07
Gatsl3	-5.77805	7.63116e-07
Emg1	5.2243	7.65717e-07
1700016K19Rik	5.21342	7.66357e-07
Rps23	-5.7651	8.09245e-07
Elovl7	5.20382	8.11409e-07
Rlf	5.55431	8.11409e-07
Mkrn1	5.63391	8.24751e-07
Stip1	-5.80407	8.31654e-07
Brms1	5.63021	8.41817e-07
Lonp2	-5.76028	8.44033e-07
Psma3	-5.38155	8.63676e-07
Tmem26	-1.88806	8.63717e-07
Lcmt1	-5.68049	8.91051e-07
Ndufb3	5.71627	8.95919e-07
Spc25	-4.69566	9.03767e-07
Ngdn	-4.93898	9.04066e-07
Hsdl2	-5.82144	9.1168e-07
Atp5l	5.73572	9.44505e-07
Vdac2	-5.74271	9.44505e-07
Qser1	5.61807	9.46995e-07
Fmo1	-5.76827	9.69422e-07
Gja1	-4.92084	9.69514e-07
Phf10	-5.66229	9.89761e-07
Arid5b	-5.70469	1.0205e-06
Eif4a2	5.69991	1.02459e-06
Ubl5	5.67199	1.02728e-06
Ubiad1	5.24447	1.06959e-06
Prkag1	-5.76277	1.1043e-06
Eif3d	-5.59561	1.15252e-06
Dbnl	-5.6706	1.15908e-06
Mtx1	5.61642	1.15997e-06
Nosip	-5.60511	1.16225e-06
Smoc2	-5.73116	1.16511e-06
Hspa9	-5.48217	1.17672e-06
Hif3a	-5.73144	1.18245e-06
Vapb	-5.56046	1.18245e-06
Fem1c	5.43748	1.22105e-06
Npl	-4.44406	1.24026e-06
Parp1	-5.64226	1.2424e-06
Ube2d2a	-5.6884	1.26179e-06
Rbbp4	-5.66044	1.28839e-06
Apopt1	-5.71714	1.33935e-06
Actl6a	-5.67404	1.35152e-06
Eif5b	5.50119	1.367e-06
Csde1	-5.63642	1.40075e-06
Aurkb	2.93799	1.4094e-06
Toporsos	5.42295	1.40998e-06
Rpl29	5.52326	1.42762e-06
Pnkd	5.57893	1.44286e-06
Faim	5.53695	1.48946e-06
Samm50	-5.29572	1.50791e-06
Fuom	5.48154	1.51285e-06
Bax	5.60225	1.53583e-06
Slc25a33	5.36717	1.53966e-06
Eprs	-5.68754	1.54196e-06
Baiap2	-5.62627	1.6607e-06
Fam101b	5.38129	1.6978e-06
Copz1	-5.66498	1.71268e-06
D17H6S53E	5.29277	1.71641e-06
Tnfrsf18	-5.53085	1.74501e-06
Vasp	-5.56504	1.75671e-06
Ctxn1	5.35969	1.79616e-06
AU041133	5.33722	1.84331e-06
Grhl3	3.92719	1.8676e-06
Fh1	-5.60437	1.95905e-06
Fam129b	5.33833	1.98309e-06
Rpn2	-5.45744	1.99947e-06
Bpgm	5.41944	2.11106e-06
Ergic3	-5.62161	2.11569e-06
Ndfip1	-5.71625	2.14153e-06
Rraga	5.42765	2.1576e-06
Ube2c	1.7054	2.1687e-06
Vopp1	-5.60107	2.16911e-06
Dap	-5.63028	2.1741e-06
Ppp5c	-5.61831	2.18699e-06
Grrp1	5.33006	2.2148e-06
Agpat3	5.42144	2.23318e-06
Romo1	5.56067	2.23318e-06
Mcm3	-5.46115	2.25617e-06
Sh3glb1	-5.56416	2.32266e-06
Mboat7	-5.66725	2.32828e-06
Pnrc2	-5.16348	2.36757e-06
Gnb1	-5.50817	2.44031e-06
1810013L24Rik	5.32848	2.49346e-06
Pex13	5.47749	2.50998e-06
Isoc2b	-5.66983	2.52935e-06
Opn3	5.09567	2.54451e-06
Espn	-5.6808	2.56081e-06
Abcg2	-5.65827	2.56838e-06
Parl	-5.46477	2.57063e-06
Fhit	-5.10928	2.57758e-06
Zmym1	5.32431	2.58653e-06
2310039H08Rik	-5.59578	2.63224e-06
Pkp1	-5.09146	2.63453e-06
Ints5	5.31583	2.65507e-06
Epgn	-5.09664	2.66873e-06
Wls	-5.47601	2.69412e-06
Edn1	5.27836	2.7291e-06
Mettl6	5.28691	2.73064e-06
Foxn3	5.44999	2.742e-06
Dxo	5.41001	2.86277e-06
Hk2	5.3678	2.87974e-06
E130309D02Rik	4.80472	2.88366e-06
Acd	-5.62267	2.90929e-06
Ddx39b	-5.51474	2.91421e-06
Tyms	-5.10011	2.91554e-06
Pik3r1	-5.51424	2.92258e-06
Lsm14a	-5.56091	3.02816e-06
Sulf2	4.91685	3.17337e-06
Nip7	5.33869	3.28336e-06
Rfxap	-5.27215	3.3225e-06
Jagn1	5.41377	3.33843e-06
Hebp2	5.06978	3.50133e-06
Fkbp1a	-5.4932	3.50269e-06
Prkab1	-5.60199	3.55602e-06
Psmg3	5.33871	3.59963e-06
Cyr61	3.81856	3.60573e-06
Fam122a	5.3632	3.70095e-06
Apip	-5.54887	3.70421e-06
Zkscan6	5.16465	3.70421e-06
Rab32	5.11908	3.77644e-06
Hmga1	4.98473	3.84438e-06
Lrrfip1	5.34633	3.86773e-06
Csnk2b	-5.39933	3.92047e-06
Tmem5	5.28085	3.94726e-06
Srp68	-5.47362	3.97694e-06
Tcf20	5.27923	3.98047e-06
Sult5a1	-5.03156	4.02398e-06
Ech1	-5.41009	4.06054e-06
Sox6	-5.51757	4.21744e-06
Cenpa	4.31591	4.22874e-06
Dnase2a	-5.50475	4.23242e-06
Pfdn4	5.36071	4.24377e-06
Sesn1	-5.54176	4.25279e-06
Bag6	-5.49293	4.28021e-06
Icam1	-5.50254	4.3979e-06
Acaa1a	-5.31292	4.41575e-06
Rab26os	5.1659	4.43824e-06
Ptprz1	-5.50444	4.44769e-06
Dnajc15	5.37999	4.49353e-06
Hmg20b	-5.48073	4.57321e-06
Cmpk1	-5.47714	4.59859e-06
Hspbap1	4.76062	4.62278e-06
Erbb2ip	5.34599	4.68015e-06
Siva1	-5.32506	4.71064e-06
Prkrir	5.31031	4.90176e-06
Bri3bp	5.02831	4.91199e-06
Eef1e1	5.27232	5.0744e-06
Rpl37a	5.40296	5.30771e-06
Ets2	-5.44563	5.34076e-06
Atp6v1f	5.39008	5.41238e-06
Cln5	5.17897	5.47467e-06
Emc10	-5.43833	5.5213e-06
Uvssa	-5.2878	5.53048e-06
Plekha5	-5.3063	5.64907e-06
Cbx3	4.87661	5.69638e-06
Aar2	5.10017	5.83735e-06
Actn4	-4.54528	5.85244e-06
Med6	5.31143	5.92478e-06
Fn1	4.66448	5.93308e-06
Paip2	-5.37224	6.16162e-06
Atpif1	-5.28044	6.2128e-06
Tchh	5.18155	6.24105e-06
Vimp	-4.56965	6.31298e-06
Rexo2	-5.4075	6.36573e-06
Spcs1	4.01356	6.40236e-06
Abhd6	5.12938	6.55266e-06
Cpsf3l	-5.43276	6.68345e-06
Pfdn1	-5.35132	6.68345e-06
Cdca2	4.68159	6.68876e-06
Pcyox1	-5.30538	6.83921e-06
Tmem59	-5.36168	6.84037e-06
Srp9	5.01342	6.90298e-06
Map2k2	-5.30793	6.90658e-06
Rassf9	5.25832	6.90658e-06
Cstf2t	5.18795	6.99162e-06
Mrps18b	5.12331	7.36786e-06
Abhd16a	-5.41817	7.45365e-06
Med22	-5.46002	7.46909e-06
Cyth2	-5.24772	7.48784e-06
Psat1	-5.23488	7.48784e-06
Pnma2	4.04767	7.53573e-06
Stk25	-5.34177	7.73489e-06
Prkar1a	-5.28231	7.74057e-06
Znhit3	5.24302	7.74326e-06
Supt4a	5.25556	8.0101e-06
Shmt1	-5.14562	8.04693e-06
Mmaa	5.16662	8.08568e-06
Zbtb16	-5.43181	8.31361e-06
Yif1a	-5.23727	8.32459e-06
Gna11	-5.36869	8.42602e-06
Nedd9	4.8179	8.45904e-06
Ankrd10	5.2426	8.65165e-06
Ankrd40	5.16395	8.77362e-06
Tex10	5.19335	8.77362e-06
Rpl9	5.24407	8.83892e-06
Naa50	5.25841	9.36404e-06
Pmm1	5.07474	9.66501e-06
Rfng	-5.19545	1.05966e-05
Mrpl9	-5.32498	1.06092e-05
Rxrb	-4.70148	1.06326e-05
Ltb4r2	-5.28719	1.07997e-05
2010111I01Rik	5.16223	1.14215e-05
Cxxc1	-5.32968	1.16178e-05
Ythdf1	5.16776	1.16178e-05
Fat1	4.85951	1.20111e-05
Cggbp1	4.75974	1.21054e-05
Eif3l	-5.22066	1.21457e-05
Pcbd2	-5.27847	1.22647e-05
Ctdsp2	-5.04891	1.24809e-05
Traf7	-4.01702	1.27206e-05
Cstf3	5.15944	1.27872e-05
Pole4	5.13578	1.29206e-05
Ndufaf7	5.08305	1.30135e-05
Smdt1	-5.20172	1.31626e-05
Rock1	-5.02206	1.32566e-05
Srsf11	-5.21499	1.33711e-05
Ppp1r2	-4.92916	1.33947e-05
Pigf	-4.49568	1.3485e-05
B9d2	5.08647	1.36716e-05
Rps16	-5.20887	1.39069e-05
Fbxo46	4.86733	1.4235e-05
Cacfd1	-5.29011	1.4321e-05
Nufip2	4.98911	1.43933e-05
Srpk1	4.64035	1.4424e-05
Phrf1	5.07615	1.46846e-05
Exosc5	-4.96248	1.47528e-05
Sf3a3	-5.19924	1.48301e-05
Plrg1	-5.25724	1.49052e-05
Rnf25	4.91638	1.50021e-05
2700038G22Rik	5.062	1.52348e-05
Tuba1c	4.78828	1.52348e-05
Mybbp1a	5.13731	1.538e-05
AK010878	-5.26322	1.55943e-05
1110008F13Rik	4.92251	1.57053e-05
Aspscr1	-5.24502	1.57053e-05
Psma4	5.16466	1.57701e-05
Macrod2	-5.09442	1.58782e-05
Mbd3	4.85416	1.63153e-05
Sppl2a	-4.8487	1.64445e-05
Ptges3	-4.87236	1.67948e-05
Hnrnph1	-4.80129	1.68599e-05
Mgst3	-4.86587	1.70981e-05
1700048O20Rik	-5.343	1.72924e-05
Fdps	4.93327	1.743e-05
Pdap1	-5.12681	1.78617e-05
Slc35b2	4.86154	1.80751e-05
Lta4h	-5.23302	1.81514e-05
Spryd4	5.03293	1.81514e-05
Mb21d2	4.87105	1.83672e-05
Tfpi	-5.10446	1.83891e-05
Irf3	5.08345	1.8459e-05
Lsm6	5.00317	1.84646e-05
Bre	-4.95781	1.85126e-05
Coil	4.67388	1.87995e-05
Smc3	-5.08583	1.88051e-05
Tomm5	5.11686	1.97828e-05
Pa2g4	-5.13181	1.98763e-05
Ubxn6	-5.21085	2.02368e-05
Ik	-4.99563	2.04336e-05
Ppig	4.8399	2.05396e-05
Ado	5.0378	2.09428e-05
Ggct	4.55442	2.10136e-05
Msh2	-5.11176	2.11755e-05
Pura	5.02261	2.20842e-05
Dgcr6	-5.14118	2.21276e-05
Dpp7	4.76341	2.23594e-05
Anxa7	-5.12284	2.23781e-05
Sppl3	-5.15171	2.25608e-05
Trmt10a	4.78761	2.2605e-05
Tor3a	-5.20002	2.26548e-05
Actb	5.05698	2.30336e-05
9430016H08Rik	5.03208	2.3132e-05
Eif5	-5.0344	2.35848e-05
Acp6	-4.83394	2.39754e-05
Chchd7	-5.00694	2.3988e-05
Rpl32	-5.0939	2.3988e-05
Psmd2	-5.01219	2.41501e-05
Lor	4.89419	2.44253e-05
Cbs	-5.14346	2.46499e-05
Cd109	-5.16219	2.47117e-05
Spo11	-5.21761	2.49831e-05
Dst	4.77258	2.5038e-05
AI837181	4.8905	2.53893e-05
Rsbn1	4.77962	2.56644e-05
Pten	4.7677	2.61703e-05
Chchd6	-4.4514	2.62259e-05
Eps15l1	-5.17401	2.64074e-05
Lrwd1	-5.08036	2.65174e-05
Hilpda	-4.87145	2.67375e-05
Chid1	4.88511	2.69362e-05
Klc4	-5.24641	2.69586e-05
Erlec1	-5.05161	2.69708e-05
Ndufs3	-4.92038	2.70577e-05
Irak1bp1	4.93394	2.71108e-05
Wdr73	4.92659	2.71108e-05
Matr3	4.56652	2.75695e-05
Pkig	5.01193	2.76602e-05
Plekhf2	4.86388	2.78297e-05
BC026585	-5.1933	2.81961e-05
Cdca8	-3.63227	2.83307e-05
Ddx21	4.89956	2.89179e-05
Zfp281	4.87129	2.89179e-05
Khdrbs1	-5.07122	2.90227e-05
Cinp	4.95476	2.91062e-05
Pdcd2	-4.91476	2.92066e-05
Ube2n	5.04468	2.94968e-05
Alcam	-5.12885	2.98518e-05
Surf1	-4.67008	3.01093e-05
Adamtsl1	-4.18839	3.06647e-05
Ss18	-4.90578	3.09177e-05
Eif2s2	-4.99339	3.14681e-05
Fahd2a	-5.02274	3.14681e-05
Fdft1	4.23557	3.20092e-05
Ier5	4.85664	3.22226e-05
Eif2s1	-4.95184	3.25735e-05
Csnk2a1	-5.07148	3.2631e-05
Tex264	4.86935	3.27882e-05
Sumo1	-4.49983	3.28725e-05
9130023H24Rik	-5.19529	3.29301e-05
Mrps22	-4.65751	3.29984e-05
Fbxo30	4.88225	3.30569e-05
Nsmce2	-4.87484	3.30703e-05
Prr5	4.80299	3.3109e-05
Rab40c	-5.11306	3.3109e-05
Zbtb7a	4.90606	3.3333e-05
Proser1	-5.06599	3.39584e-05
Strn4	-5.07003	3.43425e-05
Tmem165	-4.88099	3.50506e-05
Dnajc2	-5.04148	3.50971e-05
0610011F06Rik	4.93647	3.54667e-05
Gna13	4.59023	3.55381e-05
Srsf9	-4.82528	3.55381e-05
Ccdc86	4.91072	3.56442e-05
Hbs1l	-4.91028	3.61229e-05
Pik3r2	-5.06899	3.65459e-05
Cmtr2	4.6137	3.68037e-05
Selm	4.64363	3.68819e-05
Ppp2cb	-5.05772	3.68884e-05
Cox17	4.09443	3.69711e-05
Ndufa2	4.97852	3.71128e-05
Mak16	4.95287	3.76202e-05
Psmg1	-5.04058	3.81319e-05
Eif1	4.72348	3.85741e-05
Eif2b3	-4.9747	3.85741e-05
Smc2	-1.66954	3.89433e-05
Kif5b	-4.81866	3.92072e-05
Zhx2	4.84483	4.00589e-05
Retsat	-5.05953	4.01411e-05
Chmp1a	-4.99357	4.02713e-05
Mrpl48	-4.97214	4.07094e-05
2310030G06Rik	4.85947	4.1606e-05
Bnip3l	-4.83932	4.19854e-05
Rad23b	-4.79178	4.26302e-05
Tmem161a	-4.98767	4.26302e-05
Rpp30	-4.86217	4.27691e-05
E2f4	-4.98968	4.35106e-05
Med25	-4.8647	4.35106e-05
Nipsnap1	4.84599	4.37179e-05
Zfp518a	4.75669	4.37655e-05
Snhg6	4.93731	4.39319e-05
Lgals9	-4.59204	4.45756e-05
Tmem65	-4.97619	4.47688e-05
Gdpgp1	4.61665	4.48701e-05
Pdgfc	-4.98297	4.60606e-05
2310022A10Rik	4.78995	4.61315e-05
Lars	-4.97412	4.6828e-05
Nisch	-4.25358	4.72046e-05
Psmd13	-4.97562	4.77167e-05
Cdca3	-0.336247	4.7991e-05
Paox	4.85282	4.84307e-05
Psmd3	-4.96546	4.85438e-05
Penk	4.63381	4.87093e-05
Ubb	3.89064	4.87117e-05
Sod2	-4.85922	4.91954e-05
Acbd6	-4.88167	4.95843e-05
Nrbp1	-4.83302	4.96992e-05
Flrt3	4.78794	5.04036e-05
Myc	4.75091	5.30527e-05
Tcf25	-4.89379	5.33328e-05
Gm1673	-4.65991	5.35296e-05
Gsta4	-4.16454	5.37198e-05
Nabp2	-4.86762	5.44633e-05
Hspa14	-4.92798	5.46636e-05
Rgs12	-4.88213	5.48409e-05
Brd3	-4.76467	5.48763e-05
Cmtm7	4.68083	5.48763e-05
Elovl6	4.68295	5.59341e-05
Spag9	-4.95871	5.60549e-05
Eif4a3	-4.85159	5.6251e-05
Eif3b	-4.92383	5.68823e-05
Rars	-4.95459	5.69224e-05
Mettl16	4.8351	5.69353e-05
Vkorc1	-4.95433	5.70157e-05
Mef2c	-3.54026	5.71882e-05
Sh2b1	-4.95031	5.7334e-05
Flrt2	4.41301	5.73521e-05
Snrpn	-4.95829	5.82103e-05
Snx2	-4.89422	5.8235e-05
Necap2	-4.85692	5.86447e-05
Aen	4.817	6.21664e-05
Fars2	4.46527	6.22353e-05
Tatdn1	-4.69091	6.34109e-05
Glud1	-4.92262	6.67105e-05
Cbx2	4.75384	6.68704e-05
Cuedc2	-4.91455	6.72866e-05
Dnajb6	4.84865	6.7831e-05
Cirbp	-4.61791	6.81551e-05
Supt5	-4.9104	6.81551e-05
Spcs3	-4.93297	6.83214e-05
Ahnak	-4.79915	6.85931e-05
Bclaf1	-4.54717	6.9076e-05
Mex3a	4.78828	6.90884e-05
Sfxn1	4.77829	6.99241e-05
Arl5a	4.42678	7.08532e-05
Riok3	-4.88089	7.13613e-05
Arid1a	4.74883	7.39524e-05
Nop58	-4.65166	7.39806e-05
Nme1	4.75634	7.46732e-05
Eif4g2	-4.77014	7.68013e-05
Asap1	-4.67078	7.8822e-05
Ankrd22	-4.92178	8.01348e-05
Pcsk2	-4.95205	8.20518e-05
Capn1	-4.67369	8.20811e-05
Gm10094	4.53079	8.28626e-05
Prim2	-4.62707	8.35442e-05
Pigyl	4.71996	8.45153e-05
Prrc2b	-4.81446	8.55456e-05
Xrcc5	-4.76217	8.59015e-05
Cdk9	4.73572	8.68085e-05
Dgcr14	4.68756	8.70113e-05
Tsg101	-4.80882	8.86607e-05
Hint3	-4.89688	9.02199e-05
Rab27b	-4.8349	9.03938e-05
Adprm	4.53131	9.11789e-05
Hdgfrp2	-4.80646	9.11789e-05
Ide	-4.84583	9.20972e-05
Erp44	-4.84289	9.21455e-05
Sertad1	4.68567	9.41777e-05
Sar1b	-4.41129	9.62668e-05
Rnase4	-4.83918	9.73435e-05
Stx4a	-4.59009	0.000101172
Ap2a2	-4.76203	0.000101813
Faf1	-4.71227	0.000101813
Wdr86	4.4749	0.000103344
Thap7	4.62379	0.000103648
Car13	-4.73361	0.000105115
Aldh4a1	-4.80217	0.000105269
Tbc1d7	-4.63073	0.000105673
Gtf2f1	-4.64728	0.000108445
Rpl37	4.75363	0.000112018
Cars	-4.3767	0.000112431
B9d1	4.64021	0.000114207
Itsn2	-4.45588	0.000116862
Src	-4.79699	0.000116881
E2f3	4.21692	0.000116967
Lipt1	4.43945	0.000116967
Ptbp1	-4.72064	0.000117671
Dnajc7	-4.70504	0.000118924
Prps1l3	4.39685	0.000119016
Socs4	4.59225	0.000119802
Dnajc17	-4.81106	0.000119981
Cops4	-4.76126	0.000120374
Wbp5	4.71519	0.00012113
Bcl7a	4.65315	0.000121234
Tuba4a	4.66923	0.000122102
Ciapin1	-4.63715	0.000124625
H2afz	4.49628	0.000125369
2210016F16Rik	4.56588	0.000125836
Cenph	-4.38176	0.000126813
Cdc123	-4.57765	0.000129912
Kpna6	4.33648	0.000130433
Ssx2ip	-4.79419	0.000131792
Zfp451	4.22493	0.000131792
Fbl	-4.7056	0.000132875
Smim22	4.37497	0.000133418
Timp3	4.60405	0.000134131
Cks1b	4.11297	0.000134312
Drap1	-4.08864	0.000138025
Ube2s	-4.71486	0.000138474
Dnaja1	4.66535	0.00013988
Tfrc	-4.3233	0.00014063
Vps52	-4.55351	0.00014063
Ppm1g	4.61089	0.000142217
Cnot10	-4.38466	0.00014554
Spop	-4.3736	0.000146534
Ssb	-4.34264	0.000146802
Ilkap	-4.3374	0.000147784
Ccdc61	-4.74788	0.000150366
Seh1l	-4.72358	0.000150747
Pdcl	4.41479	0.000150813
Alkbh4	4.50953	0.000152507
Aldh7a1	-4.73565	0.00015283
Rpl11	4.67788	0.000155646
Hnrnpl	-4.53267	0.000155809
Sars	-4.48349	0.000155906
Ghitm	-4.5177	0.000157568
Paip1	4.01452	0.000158032
Kdf1	4.5227	0.000160102
Ola1	-4.67428	0.000166006
Racgap1	-3.89153	0.000168856
Mknk2	-4.72123	0.000169927
Pcdh9	-4.63422	0.000169937
Gbf1	-4.73725	0.000172369
Metrn	4.55109	0.000172895
Psma1	-4.52374	0.000177311
Fam173b	-4.72771	0.000178053
Pcdhga12	4.20904	0.00017813
Brap	-4.29419	0.000179195
Junb	-4.13754	0.000179339
Emc2	-4.6486	0.000184272
Esco2	-3.22723	0.000184272
Ppp1r14a	-4.54675	0.000184882
Trmt12	4.44253	0.000184882
Wnk1	-4.55115	0.000188329
Naa35	-4.67168	0.000190221
Txndc15	-4.68329	0.000192676
Zfp763	4.43321	0.000192969
Mtmr10	4.43982	0.000195027
Hoxb6	4.43174	0.000196643
Pgpep1	4.46178	0.000197146
Dynlt1a	4.37583	0.000198043
Cpsf3	-4.44513	0.000202843
Sec31a	-4.42874	0.000203402
Mrpl32	4.53338	0.000204781
Lrrc14	4.12687	0.00020554
Lrp4	4.42078	0.000206645
Tmem222	-4.67035	0.000209075
Wnt16	-4.53704	0.000209077
Itga6	4.3182	0.000209494
Il20rb	-4.33161	0.00021008
Pfas	4.52081	0.000210829
Slc7a1	-4.00464	0.000211615
Osbpl9	-4.64921	0.000211664
Eif4ebp1	4.50737	0.000212765
Agtr1a	-4.66437	0.000217671
Clta	-4.49554	0.000222749
Ube2e2	-4.51356	0.000222749
D1Ertd622e	3.88513	0.000225729
Prim1	-4.59012	0.000226713
1700123O20Rik	4.55951	0.000226998
Ift20	-4.20587	0.000230184
Efna4	3.58242	0.000232032
2510039O18Rik	4.3092	0.00023274
Alkbh5	4.48852	0.000233977
Ndufb8	-4.58356	0.000235129
Atp6v1d	-4.61985	0.000235509
Dhrs1	-4.54587	0.000236333
Lig1	-3.763	0.00023649
Fst	4.53147	0.000239174
Dtnb	-4.35205	0.000241463
Cycs	-4.33498	0.000241878
Prkcdbp	4.54872	0.000242214
Nipa2	3.57518	0.000248332
Ccdc127	4.41427	0.000248759
Nr2e3	-4.63473	0.000249223
Setdb1	4.47777	0.000249327
Tcf3	-4.41004	0.000253891
Rrm1	-3.79916	0.000254298
Chchd2	-4.56162	0.000254925
Atxn1l	4.43267	0.000255345
Gca	-3.98504	0.000256173
Tmem218	-4.64546	0.000256234
Nme7	-4.61712	0.00025698
Smim14	-4.20743	0.000258361
Palld	-4.19552	0.000260002
Cpne3	-4.14732	0.000261952
Tcf19	-4.53464	0.000265143
B3galt4	4.23734	0.000265705
Rmi1	3.39552	0.000267288
Plaa	4.39596	0.000267498
Exosc3	4.48371	0.000269321
Smarca5	-4.47122	0.000269321
Rad50	-4.58366	0.000269647
Gpaa1	-4.59106	0.000270577
Pxdn	4.2326	0.000270577
Dut	-4.51014	0.000271895
Ppia	-4.54463	0.00027245
Lifr	-4.29466	0.000274515
Rgs19	4.34605	0.000277234
Hmmr	2.21605	0.000277624
Mtif3	4.42109	0.00027798
Slc15a2	4.37908	0.000278746
Mrps30	4.4329	0.000279151
Filip1l	4.19708	0.000279872
Rmdn1	-4.38532	0.000280867
Thap3	4.40646	0.000284562
Vps51	4.19131	0.000286752
Dbr1	4.38019	0.000287278
Atp2b1	4.17919	0.000290485
Phf14	-4.50032	0.000295441
Osgep	-4.48303	0.000295516
Msl3l2	4.26469	0.000297102
Rcc2	-4.53055	0.000301576
Adamts9	-4.28838	0.0003016
Klc1	-4.5764	0.000302324
Clk1	-4.51861	0.000304867
Efemp1	-4.28935	0.000304867
Larp4	4.4402	0.000306065
Sptssa	4.39597	0.000306065
Slc35e4	-4.65687	0.000306962
Mpped1	4.41797	0.000308423
Trap1	4.46463	0.000308539
G3bp1	4.42046	0.000308919
Tcp1	-4.51552	0.000312204
Ttc30a1	4.35636	0.000313625
Ufl1	-4.50693	0.000313826
Mfap2	4.39839	0.000314114
Cdk1	0.784927	0.000315086
Acer3	4.2145	0.000316179
Cuta	-4.47928	0.000321518
Prkaa1	4.15303	0.000321518
Slc1a4	-4.53916	0.000321518
Lamp1	-4.51887	0.000324189
Arfgap2	-4.53732	0.000329008
Slc25a28	4.16347	0.000330845
Acad11	-4.50872	0.000330932
Cd5	-4.35986	0.000330932
Ncbp1	-4.41788	0.000331162
Ces2e	-4.65234	0.000332909
Ptn	-4.47829	0.000332909
Nrip3	-4.62663	0.000332941
AI987944	4.2721	0.000334011
S100a10	4.43556	0.000334975
A330102I10Rik	4.0047	0.000339093
Ankrd49	4.3525	0.000341291
Zfp639	4.1103	0.000348346
Fcf1	-4.12722	0.000350583
Rwdd3	4.22909	0.000353198
Sgk3	-4.5086	0.000355942
Endou	4.03329	0.000356933
Asph	-4.53224	0.000357453
Slitrk6	-4.63101	0.000358422
Gpbp1	4.36327	0.000359385
Mul1	3.86662	0.000359385
Arhgef1	-4.52304	0.000364889
Ggcx	3.17868	0.000364889
Zfyve21	-4.40015	0.000365465
Sf3a1	-4.50218	0.000370268
Ing2	-3.46273	0.000376552
5930412G12Rik	4.164	0.000377074
Toe1	4.27563	0.000378206
Prnp	-4.19726	0.000378774
Fam195b	-4.36725	0.000378808
D930016D06Rik	4.30935	0.000378916
Hmgb2	3.62189	0.000382383
Uri1	4.09702	0.000382383
Arhgap29	4.30626	0.000387142
Sox9	3.34542	0.000406079
Ppp1r12a	-4.48393	0.000409756
Sqle	3.70823	0.000413167
Thrap3	-4.46994	0.000416073
Dse	4.29821	0.000421692
Cdk2ap2	-4.40128	0.0004221
Zcchc9	4.34119	0.000422416
Mppe1	4.04321	0.00043088
Gm20594	4.23189	0.000432995
Dsg1a	4.30223	0.000433211
Cd320	4.32022	0.000434059
Dcun1d1	4.3962	0.000436478
Polr2e	3.4819	0.000436478
Slc35e1	-4.48371	0.000436478
Prdm2	4.29271	0.000438219
Pacsin2	-4.32737	0.000439997
Hat1	-4.43017	0.000441722
Ptrh2	4.10001	0.000441722
Oxa1l	3.76587	0.000441848
Kcnh7	-4.2932	0.000447453
Fos	-2.90571	0.000451814
Hnrnpul1	-4.37844	0.000452082
Cnot4	4.36455	0.00045249
Spint2	-4.38875	0.000457392
Smim12	4.33435	0.000457491
Slc38a2	-4.41027	0.000467005
Gm20554	-4.14173	0.000468755
Nrbf2	3.64524	0.000474788
St3gal6	-4.36324	0.000474788
Lamtor1	-4.40403	0.000478752
Mrps18c	-4.20276	0.000478752
Golph3l	4.17584	0.000483866
Coasy	3.28999	0.000488277
Spats2l	-4.14996	0.000493291
Ict1	4.37528	0.000496597
Fam104a	4.05115	0.000498011
Fdxacb1	3.93494	0.000498288
Nt5c3	4.32056	0.000502487
Vamp2	-3.43778	0.000502487
Rad51	-4.44855	0.000505878
Cdca7	-4.32859	0.000506472
Rpusd1	4.25089	0.000513303
Sesn3	-4.23659	0.000514565
Atp1a1	-2.27461	0.000514693
Cmas	-3.99694	0.000514693
Col7a1	-3.18733	0.00051506
3110056K07Rik	-4.51489	0.00051631
Taf7	4.27959	0.000518162
Usp22	-4.04255	0.000519129
Cdh4	-4.45223	0.000522849
Frg1	-4.36813	0.000525465
Rnpep	-4.13017	0.000526638
Hnrnpd	-4.36835	0.000534977
Hdhd2	3.3948	0.000542401
Yaf2	4.29737	0.000550338
Sh3bgrl3	4.14405	0.00055034
Npnt	-4.43785	0.000553609
Tiparp	3.86227	0.000555173
Taf8	-4.25114	0.000565765
Ccz1	-4.22993	0.000566542
Asns	-3.70934	0.000568216
Asl	-4.33521	0.000578397
Haus4	-4.31084	0.000579244
Hdlbp	-4.25156	0.000586377
Rbm22	-4.04782	0.00058849
Lrrc24	-4.45392	0.000592112
Sik1	3.97457	0.000595097
Lmo4	-4.28678	0.000595737
Chrac1	4.28024	0.000596316
Tpr	-4.17535	0.000601334
Fam210b	4.24441	0.000604146
Tipin	-3.9178	0.000605155
Gsk3b	-4.33519	0.000606297
Psmd14	-4.25346	0.000606297
Cse1l	4.27345	0.000608947
Klhl42	3.85076	0.000611976
Kctd6	4.18161	0.000615853
Sord	-4.30923	0.000624082
Strap	-4.34924	0.00063642
H2-D1	4.21458	0.000636573
Wdr91	-4.18	0.000638036
Msantd4	4.22427	0.000644955
Lsm12	-3.97969	0.000647534
Dph7	4.17738	0.000650856
Dcxr	-4.21842	0.000653653
Zfp518b	3.55719	0.000656218
Arf3	-4.33746	0.000656417
Etfdh	-4.38972	0.000657904
Adsl	-4.33778	0.000660504
Hadhb	-4.33335	0.000662554
Cstf1	4.10707	0.000663814
Csnk1a1	-4.31289	0.000668681
Aspm	4.18858	0.000672511
Ngly1	-4.38559	0.000690176
Auts2	4.18268	0.000691447
Pbk	0.617637	0.000693833
Nmral1	-4.25954	0.000697932
Iscu	4.24513	0.000698306
Erich1	4.23532	0.000707095
Srcin1	4.19992	0.000719844
Mapk1	-4.30711	0.000721657
Gsk3a	-4.36171	0.000721874
Fggy	-4.11587	0.000722616
Sfxn3	-4.27859	0.000723033
Gm14403	3.94104	0.00072398
Bphl	-4.25542	0.00073524
Trp53i11	-3.69765	0.000737422
Timm21	4.21986	0.000743078
Rai1	4.21091	0.00075067
Snd1	-3.8963	0.00075563
Mdfi	4.15669	0.000758662
Tnfaip1	-4.13921	0.000765743
Mettl18	3.97936	0.000767956
Tmed3	-4.27802	0.000783336
Kansl2	-4.15484	0.000788784
Ptch1	2.65333	0.000807045
Farsa	-3.86111	0.000808275
Lyrm9	4.131	0.000808275
Adora2b	3.86935	0.000816353
Atp5j2	4.07874	0.000824341
Ubl3	-4.166	0.000826469
Depdc1a	4.14806	0.000834748
Adh1	-4.40933	0.000838698
Cox7a2	4.13523	0.000844095
Smtnl2	3.35788	0.000844732
5031425E22Rik	-4.29851	0.000847022
Gadd45b	4.21055	0.000847022
Hexim2	4.05194	0.000847022
Gabarapl2	-3.85588	0.000849717
Tma16	4.08228	0.000853598
Sptbn1	4.0151	0.000855588
Smc4	-2.3696	0.000861092
Baz2b	-4.24592	0.000861117
Tdrd3	3.93747	0.000862658
Ccdc8	-3.68253	0.000866
Gstm2	-4.1769	0.000869499
Lurap1	3.93205	0.000869499
Nampt	-3.98211	0.000869499
Zfp131	4.02563	0.000869834
Zfp770	4.11911	0.000878117
Rrp1b	4.04679	0.000881716
Slc25a17	-4.12377	0.000895555
Smg8	4.05989	0.000895555
Mesdc1	3.82314	0.000898397
Lsm5	4.17156	0.000898576
Rars2	-4.21544	0.000898576
Fam69b	4.11692	0.000900656
Hells	-4.26899	0.000903939
Nqo1	-4.32615	0.000904785
Chchd3	-4.254	0.000908205
2610528J11Rik	3.9743	0.000909766
Polr3g	4.16487	0.00091286
Zbtb1	4.15943	0.000913476
BC004004	-4.26258	0.000914674
Rpl34	-4.23781	0.000915765
Mars	-3.05188	0.00091585
Ppih	3.55836	0.000919206
Meis3	4.01657	0.000919221
Echs1	-3.71854	0.000920374
Spsb1	3.89744	0.000926305
Vamp3	-4.26648	0.000926305
Vcpip1	3.97817	0.00092739
Mapk3	-4.28373	0.000931833
Smad7	4.0643	0.000933229
1700025G04Rik	-4.25836	0.000935572
Emc8	4.11666	0.000943055
Itgb4	-3.82409	0.000949073
Atg13	-4.17848	0.000956673
Tut1	4.08594	0.000959379
Aldh1l2	-4.36237	0.000960965
Igsf8	4.13132	0.000969878
Bcl9	4.01448	0.000986388
Wdr70	-4.24357	0.000987417
Maf1	-4.05951	0.00100085
Mtmr14	-4.2938	0.00100141
Map3k7	-3.90666	0.00100463
Bag1	-4.21565	0.00100594
Fubp3	-4.16126	0.00100714
Snrnp35	4.05786	0.00100714
Mtdh	-4.15148	0.00100831
Eri2	2.83919	0.00101078
Aldh1b1	3.86124	0.00101459
Ppie	-4.01577	0.00102321
Igsf3	3.88253	0.00103009
Prr14l	4.02141	0.00103009
Akt1s1	-3.90241	0.00103167
Cdon	-4.24985	0.00103678
Skap2	-3.07266	0.00103678
Ndufa7	-3.81944	0.00103952
Zfp750	4.02339	0.00103952
Hira	-3.7883	0.00104061
Dtd1	-4.16844	0.00106187
Mapk7	3.90791	0.00106187
Poldip3	-4.17666	0.00106959
Fbxw2	4.12922	0.00107242
Fkrp	4.03458	0.00108182
Fam208b	4.0036	0.00108376
Ascl2	3.8072	0.00108636
Atxn1	-4.20024	0.00108989
Efna2	3.79089	0.00109777
Lhpp	-3.41863	0.00110188
Larp1	3.99098	0.00110207
Synj2bp	4.00888	0.00111078
Itgb3bp	-4.21016	0.00111701
Hras	-2.96412	0.00111862
Pex11b	4.01861	0.00112161
Ssu72	4.11937	0.00112392
Aftph	4.08848	0.00112595
Pars2	3.96294	0.00112595
Serp1	-4.20294	0.00112595
Ccar1	-4.07292	0.00113414
Copb2	-4.1891	0.00113741
Ctps	-4.20423	0.00114879
Hpdl	3.57985	0.0011621
Ugdh	-4.2208	0.00116467
Thg1l	3.23898	0.00116567
Sltm	-3.9802	0.00116695
Antxr1	-3.64656	0.00116858
Mrpl2	-4.17611	0.00117022
Med8	4.10333	0.00117049
Cped1	-4.12374	0.0011756
Eri3	-4.19815	0.00117911
N6amt2	3.8231	0.0011974
Ppp1r10	-4.02924	0.00120904
Smc6	-4.17289	0.00124366
Mcm2	-4.1918	0.00124581
Efna1	-3.91726	0.00125823
Esf1	4.12995	0.00126286
Ahcyl1	-4.19524	0.00127631
Ell2	-4.16685	0.00128221
Pttg1ip	-4.20947	0.00128221
Fam114a2	-4.08385	0.00128368
Ilk	-4.18402	0.00130257
Igf2os	3.77467	0.00130339
Prc1	-1.37145	0.00131226
Nradd	3.92334	0.00131995
0610009O20Rik	-3.54821	0.00132326
Fyb	3.85237	0.0013289
2700062C07Rik	4.05285	0.00133465
Ppp2r2b	-3.36253	0.00134302
Glt1d1	3.76668	0.00135411
Fam83a	3.90516	0.00135436
Ppil2	-3.79401	0.00135525
Gga1	-4.12966	0.00137429
Pigk	4.05602	0.00138217
Snap23	-4.17181	0.00138551
Mllt3	3.46688	0.00139491
Cacybp	4.11519	0.00139674
Mocs3	4.0031	0.00139972
Pcdh7	-4.21861	0.00139972
Gm53	3.39683	0.00140164
Cst6	-4.22224	0.00140348
Calm2	4.11506	0.00141157
Hdac2	-4.0802	0.00141487
Srp72	-4.10757	0.00141793
Vangl2	4.01276	0.00141863
Supt16	4.06734	0.00142414
Snhg11	-4.18767	0.00143281
Zfp318	2.85372	0.00143281
B3gat3	-3.97974	0.00144306
Gemin2	-4.17215	0.00144979
Prr5l	3.34414	0.00145237
Selt	-4.08727	0.00147067
BC017643	-4.15647	0.0014783
Kansl3	-3.42711	0.00148206
Shq1	3.96936	0.00148461
Pak1ip1	-4.03116	0.00149177
Snx3	-4.09377	0.0014966
Sbno1	-4.11035	0.00150782
Nfix	4.03755	0.00151359
Tsacc	-4.21547	0.00151496
Eif1ad	4.04396	0.00152088
Rab34	-4.10215	0.00152131
Auh	-3.9774	0.00152684
BC005537	3.88333	0.00153663
Tgm5	-4.22866	0.00153663
Rnf219	4.0231	0.00153883
Nrbp2	-3.83283	0.00154254
Dph5	4.03688	0.00155074
Thap2	4.00108	0.00155286
Cenpw	4.05989	0.00155363
Eps15	-4.07133	0.00156066
Lrrc8a	3.73283	0.00159808
Ctnnbl1	-4.07794	0.00160138
Mgll	-4.02297	0.00161789
Trp73	-4.1176	0.00163144
Hsd17b4	-4.09817	0.00164511
Pdia3	3.78004	0.00165486
Exoc3l4	-4.20279	0.00165805
Zbtb21	3.914	0.00167382
Apc	3.63981	0.00168232
Psma5	-3.24234	0.00169339
Cdk8	-4.12371	0.00169721
Srsf1	-4.06305	0.00169759
Socs5	3.96333	0.00169934
Nav3	-1.99157	0.00170669
Ccnk	-3.94625	0.00171319
Rab10	-4.06124	0.00172145
Alg8	3.86955	0.00172436
1700020I14Rik	-3.50012	0.00172769
Wnt7b	-4.01507	0.00173232
Ifi202b	-4.03947	0.00173985
Brd7	-4.07779	0.00175156
Pvrl3	3.90804	0.00175161
Rtn3	-3.99555	0.00178475
Selo	-4.05743	0.00178475
1810043H04Rik	3.91041	0.0018188
Arid1b	3.9876	0.00182089
Cep57	-3.91074	0.00182512
Rybp	3.76844	0.00183
Syf2	-3.95907	0.00184005
Traf2	-4.06621	0.0018487
Nav1	3.68035	0.00185233
Rora	-4.11335	0.00185233
Trim62	-4.12599	0.00185233
Rce1	3.92662	0.00186125
Pola2	-3.97951	0.00186342
Pithd1	-4.08495	0.00187148
Arhgef5	3.97047	0.00187931
Mrpl21	-4.04068	0.00190705
Atxn2l	-2.76556	0.0019333
Ubl7	-3.63143	0.0019386
Ywhab	-4.03796	0.0019609
[truncated: 10,552 more rows]

## Sheet: Epi suprabasal
Gene ID	Z score (cKO/Ctrl)	False discovery rate
Sar1a	12.6278	5.29152e-28
Rpp25l	11.943	1.23874e-26
Rpl35	12.1668	1.14627e-25
Nxt1	11.4571	1.77489e-24
Mrpl43	11.3655	8.57308e-23
Mrps34	11.2428	3.67501e-22
Mrpl46	10.2793	6.09194e-19
Rpl41	9.87134	5.21144e-17
Llph	9.72267	1.67823e-16
Rpl36al	9.56561	5.43067e-16
Ccdc59	8.85635	5.08508e-14
Gadd45gip1	8.54993	1.97991e-13
Stfa3	-8.24347	2.50947e-12
Pop7	8.14554	3.50075e-12
Lsm10	8.13815	5.02059e-12
Fdx1l	8.06616	1.19126e-11
Ncl	8.14841	1.19126e-11
Mrpl51	8.00456	2.7413e-11
Rps29	7.9798	5.47729e-11
Rrs1	7.85428	7.73822e-11
Imp3	7.52362	1.50851e-10
Hist1h1c	-7.63143	2.18511e-10
Tmem11	7.37875	4.56791e-10
Mrps24	7.51105	7.84369e-10
Spink8	-6.52407	1.96216e-09
Apex1	7.23595	2.08822e-09
Phax	7.13333	3.77488e-09
Hdgf	-6.92074	5.32939e-09
Cox8a	7.22495	6.2844e-09
Jup	-7.18381	7.1276e-09
Coa3	7.06254	7.13436e-09
Uqcr10	7.17116	8.23514e-09
Rnh1	-7.16429	8.67825e-09
Emc6	7.06434	9.5498e-09
Bmyc	7.00306	1.05583e-08
Rpl24	-7.05281	1.60199e-08
Sac3d1	6.7724	2.09994e-08
Tmem238	6.81941	4.69559e-08
Mrps12	6.79021	6.38803e-08
Mrpl57	6.80382	6.61687e-08
Rbmxl1	6.75549	6.61687e-08
Tssc4	6.5934	6.61687e-08
Txnl4a	6.61689	6.61687e-08
Rpl14	-6.78393	7.38248e-08
Scand1	6.74658	7.63465e-08
Rpl22l1	-6.75813	8.18825e-08
Rpp38	6.4213	8.18825e-08
Fam212a	6.16599	8.48062e-08
Cdc42ep5	6.16163	8.85893e-08
Chchd1	6.62415	9.35324e-08
Gpatch4	6.63306	9.52488e-08
Mad2l1bp	6.13735	1.05241e-07
Uqcrfs1	6.51937	1.24887e-07
Tomm7	6.62722	1.26408e-07
Trim29	-6.19439	1.26408e-07
Timm17a	6.58327	1.30429e-07
1700021F05Rik	6.46199	1.59863e-07
Phgdh	-6.52941	1.59863e-07
Srsf5	-6.61785	1.59863e-07
Uqcrc1	-6.60813	1.6053e-07
Anxa2	-6.47979	1.76044e-07
Krt15	-6.22456	2.50387e-07
Nop10	6.5058	2.89839e-07
Arf6	6.42138	2.9383e-07
Coa7	6.1309	3.48902e-07
Sap30bp	6.03715	3.48902e-07
Lancl1	-6.35018	3.90056e-07
Ybx3	-6.40653	4.65855e-07
Dph3	6.21398	4.76481e-07
Pelo	6.15051	5.16965e-07
Gsto1	-6.37693	5.3335e-07
Mrpl12	6.18488	6.05867e-07
Polr2l	6.1814	6.57268e-07
Rhog	6.09472	7.16924e-07
Nt5dc2	-6.22768	8.69013e-07
Smim15	6.1672	9.51862e-07
2410016O06Rik	5.55511	1.13253e-06
Stfa1	-6.204	1.25208e-06
A430005L14Rik	5.85215	1.32146e-06
Anxa1	-6.19094	1.37752e-06
Rpl4	-6.19325	1.40577e-06
Avpi1	5.97664	1.68291e-06
Grpel1	6.07665	1.68291e-06
Eif3e	-6.11562	1.6905e-06
Tpgs1	5.97631	1.6905e-06
Med29	6.05088	1.72084e-06
Gnb2l1	-6.13862	1.80549e-06
Timm13	6.00561	2.95184e-06
Fam32a	5.79862	3.10721e-06
Mrpl14	6.0305	3.10721e-06
Mrto4	5.99434	3.15269e-06
Krt5	-5.91414	3.60523e-06
Mrpl34	5.94947	3.71195e-06
Rbm15	5.28164	4.25317e-06
Ccdc85b	5.30364	4.913e-06
Urah	-5.81561	5.97589e-06
Ntmt1	5.62774	6.22912e-06
Gemin6	5.71578	6.49232e-06
Ube2d3	-5.8894	6.69587e-06
Btf3	-5.73241	7.07255e-06
Ndrg1	-5.50616	7.35936e-06
Lmna	-5.68461	7.78284e-06
Med21	5.7581	9.94951e-06
Rrp15	5.67011	1.02742e-05
Ndnl2	5.67643	1.02912e-05
Mrps7	5.74047	1.12584e-05
Kif21a	-5.66236	1.1935e-05
Eif3k	-5.73206	1.31306e-05
Luc7l2	-5.68375	1.35351e-05
2510002D24Rik	-4.32677	1.35929e-05
Sfn	5.72912	1.39658e-05
Tbcc	5.44971	1.43061e-05
Rps5	-5.71086	1.51582e-05
Pgp	5.52406	1.57227e-05
Ythdf2	5.59916	1.62251e-05
Nhp2	5.67636	1.67608e-05
Ccnd3	-5.68916	1.74404e-05
Rpl3	-5.66402	1.873e-05
Wdr18	5.44416	1.90525e-05
Ywhah	5.46973	1.91537e-05
Tradd	5.45169	1.93139e-05
Nudt19	5.52883	1.96652e-05
Tfg	-5.66429	2.16484e-05
Rnf113a2	5.26367	2.24323e-05
Aldh3b2	-5.62015	2.28205e-05
Ndufaf4	5.54477	2.30544e-05
Kti12	5.31472	2.84978e-05
Ly6d	-5.52437	2.94043e-05
Knop1	5.41867	3.01279e-05
Scd2	5.1788	3.92694e-05
Anapc5	-5.53914	5.10258e-05
Commd2	5.37644	5.24125e-05
Cox19	5.33185	5.41077e-05
Spr	5.38117	5.49214e-05
Tst	5.1251	5.54766e-05
Bnip3l	-5.42734	5.73482e-05
Eif1a	5.29631	6.1437e-05
Exosc4	5.11282	6.57153e-05
Ywhaz	-4.85998	7.56182e-05
D8Ertd738e	5.16239	7.61242e-05
Rpl38	5.35365	7.88664e-05
Cd109	-4.98706	7.96328e-05
Tk1	4.76119	7.99884e-05
Bola1	5.18779	7.99925e-05
Chchd5	4.934	8.75231e-05
BC100530	-4.70832	8.91013e-05
Rps3a1	-5.32081	8.91013e-05
Rpl18	-5.31639	9.05258e-05
H3f3a	-5.31448	9.08552e-05
Dusp14	5.21492	9.87865e-05
Tmem167	5.22831	0.000102035
Med7	5.07327	0.000105587
Eif4g2	-4.78038	0.000106428
Magoh	5.26094	0.000106472
Psmd7	5.263	0.000107855
Set	-4.93604	0.000108832
Abt1	5.11607	0.000109284
Chchd4	5.13633	0.000112162
Anxa5	-5.21858	0.000114112
Zfp691	2.00488	0.000114112
Phlda3	5.16925	0.000122331
Nudt2	5.1315	0.000139292
Fabp5	-5.20681	0.000143383
Hdlbp	-5.12526	0.000163166
Arpp19	-5.08774	0.000171429
Rab2a	-5.14722	0.00017463
Itm2b	-5.15961	0.000175246
Naca	-5.15922	0.000175246
Slc31a2	-4.93756	0.000176322
AU022252	4.76372	0.000180558
Cdhr1	0.825745	0.00018794
Dctpp1	4.87867	0.000192496
Pabpc1	-4.94758	0.000192496
Xdh	NA	0.000192496
Tecr	-5.06407	0.000202126
Pkp3	-5.08177	0.00020407
Pkm	-5.11622	0.000206286
Rps13	-5.09972	0.000222105
Dynll1	5.08666	0.000234414
Ubxn1	-5.10895	0.000234414
Rps6	-5.063	0.000261395
Gcat	-5.00821	0.000279913
Lsm11	4.64544	0.00029871
Pop5	4.99972	0.00029871
Cxcl14	-2.57993	0.000314584
Mif	-5.01954	0.000314584
2310036O22Rik	4.22312	0.000326973
Znhit2	4.82124	0.000335595
Cdc26	4.94913	0.000363575
Trmt10c	4.78021	0.00036764
Nudt21	-4.97915	0.000392305
Gm561	4.82125	0.000422109
Srp19	4.92895	0.000428029
Lgals3	-4.74195	0.000452312
Dguok	-4.58622	0.000487123
Chid1	3.9878	0.000523155
Mbd2	-4.83661	0.000525723
Cox6c	4.89131	0.000541175
Hist3h2a	-4.46263	0.00058325
Psmd6	-4.87806	0.00058325
Uqcrq	4.85741	0.000586123
Fkbpl	4.5356	0.000594119
Cdkn1c	-4.82935	0.000603795
Eif3g	-4.82803	0.000617525
Eif5a	-4.78184	0.000617525
Myeov2	4.7923	0.000617525
Ddb1	-4.89797	0.00061928
Mrpl54	4.46731	0.000628044
Rpl23	-4.84684	0.000628044
Trappc6a	-4.7592	0.000628044
Zfp706	-4.83668	0.000628044
Psmb6	-4.80101	0.000656123
Sra1	4.66419	0.000742503
Cox6a1	4.70843	0.000765225
Rp9	4.74678	0.000778584
Fmo5	-1.35158	0.000786231
Smim5	-4.72667	0.000790062
Polr2m	-4.49235	0.000841242
Smim12	4.60468	0.000849001
Fignl1	4.46218	0.000854333
Prelid1	-4.49925	0.000854333
Dstn	-4.42193	0.000914235
Tubb4b	4.73347	0.000940217
Gnas	-4.66802	0.000941666
Rab5c	-4.78598	0.000951766
Rnf149	-4.757	0.000951766
Spsb2	3.63581	0.000951766
Mrps2	4.2365	0.00101315
Tpi1	-4.27141	0.00101315
Gfer	4.56756	0.0010183
Gjb3	4.15431	0.00106205
Ubxn6	-4.63237	0.00109559
Rpl18a	-4.68545	0.00118144
Nat2	4.00963	0.00122296
Rsrp1	-4.69498	0.00123131
H3f3b	-4.65869	0.00131737
Metrnl	4.61642	0.00134761
Wdr55	4.46755	0.00134761
Them5	-4.1152	0.00141874
Rplp2	4.63416	0.00144025
Uqcr11	4.59441	0.00144025
Rps19	-4.62742	0.00147832
Smagp	-4.04436	0.00148873
Twistnb	4.25671	0.00151196
Nck1	4.47563	0.0015283
Ces2g	-4.45912	0.00155876
Ngf	2.48378	0.00155876
Nif3l1	4.46545	0.00159111
Cope	-4.49698	0.00160474
Grhpr	-4.65276	0.00160561
Psma2	-4.52563	0.00165408
Akirin2	-4.62605	0.00184341
Polr1d	4.5171	0.00189667
Tpt1	-4.56014	0.00190302
Cebpb	4.51233	0.00191876
Ndufaf1	4.41193	0.00193746
Copz1	-4.5187	0.00205941
Mut	4.16754	0.00219012
Pcbp2	-4.52117	0.00222208
Plin3	-4.59786	0.00222637
Mrpl36	3.95732	0.00225943
Anapc15	4.37713	0.00226134
Gemin7	4.41743	0.00226134
Pole3	4.47951	0.00226134
Dynlrb1	-4.44858	0.00231111
Gars	-4.52202	0.00232508
Krt10	-4.50434	0.00232508
4833420G17Rik	3.58034	0.0023702
Bloc1s4	4.32699	0.00240912
Ass1	-4.38938	0.00242924
Glrx3	-4.34208	0.00254691
Rpl8	-4.47907	0.00254691
Etf1	-3.88167	0.00255999
Ifitm3	4.36946	0.00263956
Nup50	4.2315	0.00266816
Rps19bp1	4.43367	0.00266816
Ece2	4.24935	0.00277756
Ivns1abp	-4.46039	0.00277756
Tmem70	4.30537	0.00277756
Rps14	-4.45056	0.00278528
Gltp	-4.35778	0.00282307
Pitpna	-4.51976	0.00282307
Tomm22	4.03229	0.00282307
Ackr4	0.408931	0.00299846
Rab7	-3.99836	0.00300183
Capza2	-4.35843	0.00328729
Mrpl50	4.33417	0.00329763
Smarcd2	-4.38681	0.00333966
Npm1	-4.40086	0.0033448
Abracl	4.32956	0.00347321
Tbrg1	-4.42442	0.00347321
Mplkip	-4.46915	0.00356758
Nedd4	-4.20594	0.00367739
Bre	-4.29027	0.00389018
Rpl28	-4.35491	0.00394357
Psph	-4.36438	0.00409278
Spryd4	4.04912	0.00409278
Cct4	-4.35568	0.00416986
Dynll2	4.28624	0.00416986
Lcmt2	3.96841	0.00416986
Mrps21	3.84791	0.00416986
Gltscr2	-4.34669	0.00418472
Hspa1a	3.88212	0.00424418
B4galt2	NA	0.0043445
Ddx24	4.29206	0.0043445
Rab6a	-3.53822	0.0043445
Rnls	NA	0.0043445
Ywhab	-3.35212	0.0043445
Rpl7	-4.31845	0.00440166
Trim27	4.20183	0.00440342
Ugp2	-3.53114	0.00450269
Atp5e	4.06595	0.00474605
Ppp1cc	-4.18722	0.00474605
Pkp1	-4.26126	0.00478263
Yaf2	4.1274	0.00478263
Rnf146	4.16631	0.00480587
Tmem248	3.64608	0.00488288
Sde2	4.20746	0.00492702
Penk	1.99912	0.00497312
Cdc42	-4.19451	0.00501192
Cotl1	-4.30959	0.00501192
Rhov	-4.23558	0.00508145
Clp1	3.88399	0.00518542
Rnmtl1	4.07997	0.00518542
Pmaip1	-4.2382	0.00528596
Bsg	-3.99442	0.00538438
Zmat2	4.23814	0.00548606
Cox7c	4.24833	0.00556575
Eid1	-4.32872	0.00557176
Deb1	4.14785	0.0057611
Rchy1	-1.4418	0.0058356
Spin1	3.91555	0.00599387
Fdps	4.14564	0.00629233
AU041133	3.78817	0.00667144
Oma1	3.90728	0.00681588
BC003965	4.15401	0.00700461
Krt32	-3.79327	0.00700461
Eid2b	3.82499	0.0072384
Etfa	-4.20013	0.00725505
Arid2	4.03782	0.00730183
Bnip3	-4.21173	0.00730183
Lpcat2	3.78283	0.00731663
Vdac1	-4.14585	0.00742276
Rpl10a	-4.16528	0.00744384
Pml	-0.946273	0.0074633
Sf3b6	-4.11833	0.00753114
Cbr2	-3.80953	0.00755985
Psmc6	-3.77945	0.00758307
Ahcyl2	-4.14103	0.00762973
Rps18	-4.15364	0.00765283
Elof1	4.0963	0.00798994
Rab11a	-4.14679	0.00798994
Zswim1	3.89864	0.00800096
Sdhb	-4.13737	0.00803155
Yif1a	-4.16041	0.00810316
Rps3	-4.11681	0.00868496
Fos	-3.08739	0.00870814
Asns	-3.55332	0.00885635
Chchd10	4.05072	0.00889177
Ptprs	-1.2074	0.00903247
Fam213a	-2.69285	0.00993881
Krt14	-1.7743	0.00998482
Nudt9	2.70133	0.00998482
Hadha	-2.66356	0.0100434
Ndufv3	3.86801	0.010218
Asun	-2.05869	0.0102848
Fam162a	-3.97239	0.0102848
Pdk1	-3.77108	0.0102848
Vav3	-4.07989	0.0105486
Mrpl20	4.01449	0.0105583
Hmox2	3.68615	0.0107928
Cbr1	3.848	0.0107998
Trp53	-4.06859	0.0111143
Gpaa1	-4.08384	0.011205
Npl	-2.78569	0.0113628
N4bp2l2	3.27137	0.0114796
Mrpl19	3.97612	0.0114798
Mrpl40	3.83192	0.01148
Ndufa3	3.0908	0.0115094
Qars	-4.033	0.0115094
Wdr73	3.89384	0.0115094
Celf2	-4.05669	0.0116766
Rps26	-4.02207	0.0117337
Acot1	3.96986	0.012057
Med8	3.33836	0.0120634
Suclg1	-4.03039	0.0121803
Mrpl17	3.64217	0.0123257
Timm10	3.93056	0.0127167
Csnk1a1	-3.94375	0.0127388
Atp5f1	-3.958	0.0127644
Cd47	-3.86798	0.0128258
Hexim2	NA	0.0130242
Spen	-3.77704	0.0131675
Mrpl16	3.8882	0.0133245
Bola2	3.95501	0.0133527
Trap1	3.90366	0.0136316
Chac2	3.86008	0.0136441
Creg2	-3.94248	0.0136441
Lsm12	-3.97574	0.0136441
Serpinb8	-3.17291	0.0138682
Psat1	-3.21323	0.0139696
Pebp1	-3.78447	0.0139934
Il20rb	-3.98453	0.0141825
Metrn	3.64471	0.0147562
Sub1	-3.92887	0.0147562
Hmgn1	-3.70428	0.0148078
Perp	-3.94443	0.0148384
Atg3	-3.96708	0.0150529
Psmc3	-3.87139	0.0156444
Znhit3	3.83362	0.0156444
Pgam1	-3.36138	0.0161308
Rab38	3.85471	0.0161635
Tmem261	3.79131	0.0161635
Adh5	-3.90716	0.0164272
Rps7	3.91246	0.0164272
Rps20	-3.91079	0.0164901
Acaa2	-3.77091	0.0165756
Rbm42	-3.94969	0.0165756
Rpl21	-3.90681	0.0166286
Smo	-3.96306	0.0168365
Pigf	-3.92603	0.0169554
Trappc3	3.51681	0.0171017
Commd5	3.80363	0.0173995
Mrps25	3.80022	0.0174877
Coa6	3.76588	0.0175375
Papolg	-2.89759	0.0175875
Hes1	1.88429	0.0176621
C1qbp	3.87002	0.0176961
Mrpl15	3.08349	0.0176961
Rpn2	-2.48628	0.0176961
Ap2m1	-3.90914	0.0177285
Eif2s2	-3.58512	0.0177465
Elovl7	3.78283	0.0177586
Gtf2i	-3.80512	0.0177586
Zfp593	3.70665	0.0177586
Gnb2	-3.718	0.0179085
Pradc1	2.64754	0.0179085
Rpl9	3.39041	0.0180086
Tfrc	-3.72915	0.0182459
Nckap5	NA	0.0189774
Tfpi	NA	0.0189774
Arhgef5	3.59473	0.0191722
Sox6	-3.90178	0.0193811
Nek7	-1.4105	0.0195571
Cdk2ap2	-3.64296	0.0197244
Snrpb2	3.57275	0.0197244
Mrps22	-2.45662	0.0200621
Rabac1	-3.71289	0.0200621
Cdkn2b	-3.60921	0.02022
Ldha	-3.83696	0.02022
Bzw1	-3.8306	0.0202344
Rpl17	-3.83589	0.0202344
Mtch1	-3.8609	0.0202741
Parl	-3.86525	0.0202741
Trappc5	3.19025	0.0203363
Rab10	-3.65463	0.0204356
Nxf1	2.98848	0.0213787
Med18	3.6078	0.0214057
S100a16	-3.71296	0.0214057
Mrpl27	3.28346	0.0217352
Rtn4	-3.80813	0.0217992
Polb	-3.78867	0.0218789
BC030867	2.03871	0.0222504
Dnajb6	3.70355	0.0222504
Rad23b	-3.36356	0.0222504
Higd1a	-3.75679	0.0233312
Pramef8	3.40473	0.0234517
Ehd1	3.39478	0.023524
Scd1	3.31955	0.023524
1110038F14Rik	3.72935	0.0237151
Fam210a	3.63441	0.0237223
Ostf1	-3.79318	0.0237223
Eif3c	-2.7552	0.0238079
Ubqln1	-3.81016	0.0239755
9830147E19Rik	3.18584	0.0239844
Nars	-2.75968	0.0241703
Wnk1	-3.80781	0.0243508
Cmtm7	2.60276	0.0243829
Utp11l	-3.65806	0.0243829
Kars	-3.5783	0.0244048
Hoxb9	2.02335	0.0245243
Serpinb12	-3.12217	0.0245243
Gtf2f2	3.59169	0.0257044
Aldoa	-3.64196	0.0258561
Fam167a	NA	0.0259338
Gabbr1	NA	0.0259338
Stard7	-3.64784	0.0259338
Tubb3	NA	0.0259338
Tm2d2	3.44487	0.027266
Sar1b	-3.76014	0.0275449
Insr	1.98385	0.0280332
Mblac1	2.1897	0.0281483
Nt5c	3.67145	0.0281483
Hist1h2ap	2.89317	0.0290382
Tpst2	3.59732	0.0291786
Bri3bp	3.63075	0.0301372
Gnb1	-3.39992	0.0309462
Dbnl	-3.562	0.0319625
Phlda2	3.30375	0.0319625
Nop2	3.61392	0.0327928
Fgfr3	-3.70881	0.0331592
Pik3r1	-3.55328	0.0334363
Hnrnpab	-3.64336	0.0334389
Usp22	-3.39961	0.0334389
Mrps23	3.54448	0.0344821
Ncbp1	-3.71664	0.0345902
Reep4	-3.6782	0.0345902
Gmps	-3.41325	0.0354524
Mybbp1a	3.57837	0.0359584
Srrt	-3.61408	0.0360391
Klhdc4	3.01291	0.0364118
Gimap9	3.34702	0.036474
Mrps17	3.58709	0.0368339
Nr3c1	-3.6761	0.0369311
Puf60	3.59216	0.0369311
Gm13251	3.33664	0.0369336
6430548M08Rik	3.32756	0.0369878
Vldlr	-3.67913	0.0370219
Hif1a	-3.6092	0.0372329
Sec14l1	-3.53792	0.0373618
Hspd1	3.52698	0.0374992
Ubr4	-3.00354	0.0378145
Ddx52	-3.58199	0.0378726
Glrx5	3.46113	0.0378726
Ly6e	3.31174	0.0378726
Rpp30	-3.55216	0.0380434
Clic3	-3.51686	0.0390057
Spint2	-3.58204	0.0390057
Bysl	3.40283	0.0390234
Son	3.52547	0.039252
Fam63b	-3.49213	0.0406332
Hbp1	-2.54259	0.0406332
Pycard	3.43309	0.0420893
Prkrir	3.37301	0.0421596
Tyw1	2.00266	0.0421596
Atp6v1e1	-3.58978	0.0421771
Leprot	-3.18032	0.0421771
Snx3	-2.80617	0.0421771
Tomm5	3.47905	0.0421771
Rsu1	-3.61021	0.0424199
Thrap3	-3.13012	0.0424773
Cyb5b	3.5132	0.0426818
Gnai1	-2.85502	0.042902
Ptov1	-3.57287	0.042902
Tdrd3	3.18446	0.042902
Ppm1g	3.52003	0.0429896
Ddx28	3.41652	0.0430288
Capns2	3.56426	0.0434378
Abhd11os	3.15913	0.0436331
Copg2	-3.56361	0.0436331
Gas1	-1.85647	0.0436331
Rhoa	-3.27983	0.0436331
Pphln1	-3.62813	0.0436466
Atp5l	3.56522	0.0437526
Mrps26	3.44348	0.0437526
Ublcp1	3.38858	0.044056
Etfb	-3.34981	0.0441297
Polr2h	3.50229	0.0442909
Sumf2	3.43933	0.0445248
Tcf25	-3.57283	0.0446983
Hnrnph1	-3.51368	0.0448341
Hdhd3	3.33891	0.0449299
Ndufv1	-3.19914	0.0451133
Atf5	-3.45421	0.045124
Pigh	-2.67983	0.045124
Fdft1	3.08769	0.0452887
Nae1	-3.24049	0.0452887
Pafah1b3	-3.32514	0.0453922
Hoxc8	3.33576	0.0454416
Mrps6	3.45033	0.0454416
Slc22a4	-3.53837	0.0463396
Mrps33	3.53217	0.046454
Agpat2	3.38451	0.0473335
Mapk13	-3.22846	0.0473335
Mta2	-3.56582	0.0473335
Zdhhc3	3.37835	0.0473335
Epn3	3.26797	0.0478435
Gtf2h1	-1.762	0.0478435
Fhit	-3.51345	0.0482907
Rpl7a	2.28445	0.0488666
Ndufa4	3.44796	0.0489535
Necap2	-3.52626	0.0489535
Rars2	-1.95058	0.0489535
Vat1	-2.73619	0.0489535
Sfrp1	NA	0.0490556
Spag1	NA	0.0490556
Serpinb3c	-3.19861	0.0490806
Ccdc51	3.225	0.0491286
1810011O10Rik	-3.57321	0.0499697
Cd2ap	-3.33892	0.0499697
Usp50	3.35658	0.0499697
Nubp2	3.40311	0.0507516
Fxn	3.38405	0.0511864
Vps9d1	-3.56034	0.0512878
Actr10	-3.4942	0.051486
Pdia4	3.39134	0.051486
Pyroxd1	3.3042	0.051486
Prkci	2.2419	0.0516931
Vps33a	3.31231	0.0519019
Ptges	-0.264755	0.0520132
Cdca5	3.25428	0.0522465
Krtdap	-3.48967	0.0522465
Sntb1	NA	0.0522465
Vcp	-3.48855	0.0522465
G3bp1	2.09701	0.0523135
Slc15a2	3.04748	0.0523596
Arl4d	3.18908	0.0524921
Nrtn	2.58426	0.0525128
Plrg1	-3.51252	0.0525128
Cog8	3.41622	0.0525722
B4galt3	-1.80289	0.0549785
Purb	-2.63652	0.0553166
Phf5a	2.72085	0.0560325
Rab40c	-3.47444	0.0561185
Mbnl2	-3.49626	0.0563332
Rcc2	-3.33625	0.0564411
Cdk4	-3.26271	0.0564505
H19	-3.44935	0.0564505
Smarcc1	-3.36332	0.0565282
Hk2	3.30356	0.0568596
Gm5483	-2.26707	0.0569993
Nol6	2.98061	0.0569993
Dnal4	3.11953	0.0571585
Epgn	-0.494357	0.0572343
Atl3	-0.222058	0.0576458
Hnrnpd	-3.27075	0.0576458
Lysmd2	3.38972	0.0576458
Zcchc17	3.40983	0.057824
Gbas	-3.4498	0.0578633
Eif4a1	-3.44557	0.0582489
Cdc16	-1.78152	0.0598368
Gpr37	0.368245	0.0598368
Ubr2	-3.43854	0.060051
Cmtm6	-3.46589	0.0605155
Psma4	3.06223	0.0606572
Hcar2	-2.34667	0.0607843
Luzp1	3.38222	0.0610204
Atg101	3.02909	0.0612077
Egr1	-3.42301	0.0616914
Gapdh	-3.28193	0.0616914
Eif3b	-3.44162	0.0617028
Adh7	2.80527	0.0620318
Erlin1	-2.66719	0.0620852
Slc1a3	2.13059	0.0620852
Tmem123	-3.29991	0.0624306
Med9	3.36957	0.0626019
Rnf10	-3.44593	0.0626019
Serpinb5	-3.38684	0.0630698
Atp6v1g1	-3.26705	0.0631381
Srpr	-2.61552	0.0632762
1810043H04Rik	3.25548	0.0640217
Iqgap1	-2.25948	0.0644398
Snf8	-3.07494	0.0652127
Eif4h	-3.40286	0.065259
Lcmt1	-3.29698	0.065259
Ndufa7	-3.28326	0.06533
Emg1	1.78835	0.0653882
Agpat3	3.27178	0.0660847
Gja1	-2.33661	0.0660847
Farsb	-2.87813	0.0669673
H2afx	-3.41273	0.0669673
Trp63	-3.37384	0.0670073
Prdx5	-3.34837	0.0674806
Ccm2	2.95086	0.0680894
Rarg	-2.6469	0.0680894
Arhgap29	3.13798	0.0683029
Gpn2	3.15193	0.0683029
N6amt2	2.959	0.0684336
Ier2	-3.29683	0.0685455
Spag9	-3.36821	0.0689908
BC055324	2.87669	0.0689972
Phf14	-3.39281	0.0690795
Phb	-3.36537	0.0694532
Fnta	-1.98544	0.0700962
Ccdc127	3.25248	0.0701703
Rsrc1	0.251914	0.0701858
Rps8	-3.3641	0.0708193
Cox14	3.34103	0.0709256
Tsfm	3.09511	0.0709938
Htatip2	2.92385	0.0717501
Anxa8	-3.31699	0.0718635
Hyal2	3.19488	0.0718635
Oxld1	3.16815	0.0718635
Cav2	-3.38068	0.0719445
Ppp1ca	-3.31662	0.0726629
Casp8ap2	2.11283	0.0728224
Sec61g	3.3512	0.0728224
Utp3	3.20902	0.0728224
Cenpl	2.97431	0.0739255
Oxnad1	3.11677	0.0739255
Mul1	3.19589	0.0744073
Ccnh	-3.38748	0.074797
Tuba4a	3.20106	0.074797
Plekhj1	1.11384	0.0752781
Ccdc64	-3.28042	0.0757624
Cyp4f16	-3.28042	0.0757624
Zfp865	-3.38354	0.0757624
Ythdc1	3.30107	0.0757701
Acy3	NA	0.0758479
Cep112	NA	0.0758479
Guca1a	NA	0.0758479
Srl	NA	0.0758479
Ldlr	3.11904	0.0771657
Psma3	-3.16782	0.0771657
Baiap2	-3.35263	0.0772782
Hspa4	-3.03389	0.0790608
Nudt1	3.13664	0.0790608
Pigp	-3.1852	0.0790608
Rps11	-3.31618	0.0790608
Tmem40	-2.99429	0.0790608
Rhbdd1	-3.30395	0.0796264
Gm94	2.15212	0.0802387
Sf3b5	3.15989	0.0805707
Tcn2	-3.3591	0.0808588
Mat2b	-3.1451	0.0821556
Psme2	-2.91604	0.0826267
Rhobtb2	2.97534	0.0828458
Rps10	-3.29856	0.0828458
Trappc6b	-2.60859	0.0830669
Eci2	-3.14209	0.0835987
Adh1	-3.21443	0.083611
Paip2	-2.34419	0.0838464
Bag6	-3.21417	0.0842282
Pnkd	3.00028	0.0843972
Cetn3	-3.29224	0.0845591
Tprgl	-2.95282	0.0852119
Gpank1	2.94965	0.0855033
0610030E20Rik	-2.74449	0.0855325
Slc25a33	3.11292	0.0856602
Cops5	-3.25979	0.0859602
Mfsd1	3.19904	0.0866245
Marcksl1	2.92387	0.0870143
Rpl5	-3.27589	0.0872543
Topors	3.18802	0.0872543
Pdgfb	-2.4015	0.0874293
H2afy	-3.07909	0.0876313
Svil	0.230074	0.0880925
H2-Ke6	3.16092	0.0884374
Rock1	-3.31574	0.0884374
Eif3f	-3.06702	0.0892436
Krtcap2	3.19625	0.0892436
Leprotl1	3.05055	0.0901617
Mef2c	-3.02486	0.0902521
Rpusd1	3.06733	0.0905356
Swi5	-3.22998	0.0910543
Impdh2	-3.26426	0.0914828
Pik3ca	-0.981329	0.0922928
Psmg3	3.20231	0.0922928
Trim59	2.54337	0.0922928
Usp24	-3.20243	0.0922928
Nudt7	2.8745	0.0942769
Vimp	-3.17241	0.0948251
Adi1	-2.16986	0.095031
Ash2l	-2.94001	0.095031
Mrpl23	-2.90803	0.095031
Nenf	3.16279	0.095031
Sin3b	-3.1432	0.0964341
Snhg6	3.21289	0.096476
Tpd52	-3.23771	0.0968588
Rcan1	-2.52574	0.0969399
0610009B22Rik	3.17312	0.0972217
Arpc1b	3.14353	0.0972217
Kctd6	2.88665	0.0972217
Lmx1b	-3.19658	0.0972217
Mrps28	1.84003	0.0972217
Pop4	3.12109	0.0972217
Ybx1	-2.97068	0.0972217
Timm21	2.03254	0.0980693
Abhd17b	-1.53566	0.0985645
Ube2e1	-3.0897	0.0997314
2310009B15Rik	-2.86352	0.0997513
Zwint	-3.18261	0.100825
Birc5	3.03495	0.101138
Cfdp1	-3.21535	0.101138
Smek2	-3.07555	0.101138
Tuba1a	2.36729	0.101138
Wtap	2.92087	0.101138
Gm12359	NA	0.101193
Izumo1	NA	0.101193
Rbm43	NA	0.101193
Tcp11	NA	0.101193
Arnt	-3.24378	0.101483
Angptl6	-2.83768	0.102373
Parp1	-2.89556	0.102398
Cln5	2.83733	0.103174
1810058I24Rik	2.82637	0.103458
Bdh1	3.12017	0.104096
Ddah2	3.02019	0.104096
Dhrs7b	3.13205	0.104096
Eef1b2	-3.0296	0.104096
Rps23	-3.19432	0.104972
Elf2	2.85753	0.104983
Agl	-3.22467	0.105113
Sco2	2.79098	0.105686
Dpp9	-3.23967	0.106005
Ndufb10	-3.02121	0.107131
Zfp292	2.851	0.107215
Ik	-3.20793	0.10749
Klf4	-1.53099	0.107921
Zc3h14	-3.13386	0.107968
Nisch	-3.20119	0.10812
Ppic	-3.22771	0.10812
Nsf	-3.08769	0.108435
Ltbp3	2.91053	0.108681
S100a11	-3.17196	0.110622
Fam84b	-2.0765	0.110646
Sh2b1	-2.77162	0.110646
Ak6	3.11614	0.111346
Sppl3	-2.91557	0.111874
Psmc5	-3.16753	0.112008
Hoxa9	2.64083	0.112374
Prkcdbp	2.79241	0.113062
Rpl29	3.16074	0.113515
Pfkl	-2.83128	0.115001
Lamtor2	2.13395	0.115117
Hmbs	-3.16154	0.115206
Skint6	2.75165	0.115261
Akr1a1	-3.12494	0.115354
Cnot8	2.85814	0.115466
Nasp	-1.71172	0.115466
Ier5	3.00789	0.115909
Smad3	-3.14842	0.116337
Dazap1	-3.14288	0.116413
Rbp2	-2.57339	0.117038
Phf1	2.5569	0.117284
Zc3hc1	-3.08125	0.117349
Eif4b	-2.80141	0.117481
Fam173b	-2.5389	0.117769
Trio	-2.79015	0.118418
D1Ertd622e	2.41144	0.118525
Ndufv2	-2.49531	0.118836
Cyp4b1	NA	0.118857
Flywch2	-3.18801	0.118857
Klhl32	NA	0.118857
Napb	NA	0.118857
Pde4dip	NA	0.118857
Snhg11	NA	0.118857
Aldh7a1	-2.83154	0.118994
Dctn1	-1.93836	0.118994
Smarcb1	-3.09066	0.119772
Megf8	2.88607	0.120045
Nsun5	-3.17119	0.120045
Thoc6	-2.95939	0.120045
Zfp385a	-3.17125	0.120045
Ndufb9	-2.58786	0.120961
Degs1	3.09313	0.121057
Fut1	-3.17819	0.121057
Mllt3	2.93587	0.121057
Rexo2	-3.06489	0.121057
Rraga	2.58002	0.121057
Mtx1	2.59002	0.121459
Abhd6	2.97913	0.121661
Fam136a	2.53233	0.121661
Hsph1	3.04107	0.121661
Hspe1	3.0812	0.122123
Letm1	2.97988	0.122274
Rtfdc1	-3.09711	0.123174
S100a14	-3.06997	0.123289
Mavs	0.885787	0.123334
Nsa2	-3.09726	0.123907
Nthl1	-2.29933	0.123907
Orc2	1.11565	0.123907
Rnaseh2b	-3.13632	0.123907
Hdac5	-3.04837	0.124137
Rfwd2	-3.11132	0.124137
1110008F13Rik	2.45709	0.124395
Tpbg	2.681	0.125025
Fam173a	2.91123	0.12581
Rasgrp1	2.84432	0.126306
Atg13	-2.27834	0.126982
BC005561	2.7153	0.127137
Tsg101	-3.09714	0.127172
Gar1	3.08323	0.128181
Hras	-2.98587	0.128181
Rassf9	1.44583	0.128181
Selm	2.45751	0.128181
Ilk	-3.04843	0.129513
Rap1a	-2.31237	0.129786
Frg1	-2.58833	0.130369
Prmt7	-3.08333	0.130386
Aimp1	-3.07592	0.130447
Nucks1	-0.421762	0.132099
Rpl13a	-3.08506	0.132099
Dpf2	-3.12886	0.132507
Slc2a1	-1.59948	0.132523
Arhgap5	3.02535	0.132826
Itgb4	-1.96938	0.132826
Tvp23b	-2.31179	0.132914
Wdr53	2.56364	0.133627
Serpinb3b	-3.092	0.133822
Snx15	-3.12166	0.133822
Nrbf2	2.97403	0.134563
Wrnip1	2.93375	0.134883
Mocs1	-1.66359	0.135546
Sp3	2.83201	0.135806
Lamb3	1.53948	0.135866
Chpf2	2.78718	0.13613
Exosc7	-2.65009	0.136738
Sertad1	2.76595	0.136738
Pigw	-3.08537	0.137214
Prdm4	2.85782	0.137214
Sec62	2.98327	0.137214
Fam177a	2.98799	0.137522
Zfp821	-2.96589	0.138399
Tmem203	2.98667	0.138888
E430018J23Rik	-2.92659	0.140282
Cchcr1	-1.41458	0.14032
Mettl1	-3.06424	0.14032
Pick1	-0.136578	0.140647
Dnajc15	3.02595	0.140683
Ndufaf2	3.011	0.140683
Umps	2.93262	0.140683
Pafah1b1	-3.06768	0.141264
Sepw1	-2.88068	0.141264
Rps2	-3.05059	0.141799
Jak1	-2.7332	0.142444
1300002E11Rik	-1.97792	0.142572
Atp9b	-3.04108	0.142572
Sarnp	-2.91955	0.144319
Poldip2	-2.08962	0.145008
Macc1	2.5772	0.145805
Mtch2	-2.78323	0.14635
Csnk2a1	-2.70421	0.147448
Pbx1	-3.06619	0.147448
Dxo	2.79754	0.148107
Tmc7	-2.97864	0.148107
Pmm1	2.96803	0.148542
Rnf181	-3.0669	0.148871
Zcchc3	2.91963	0.149167
Eif6	-2.39157	0.149599
Mis12	2.92543	0.149599
Gtf3c6	2.4268	0.149722
Pygl	-3.06232	0.15003
Rnf4	-2.27395	0.15003
Tor1aip2	-3.04824	0.15003
Ppp2r1a	-1.95972	0.150098
Sptssa	3.01588	0.150909
Yae1d1	2.9879	0.150909
Osgin2	2.83442	0.151199
3010026O09Rik	2.80591	0.151565
Usp10	2.71849	0.151565
Wdr70	-3.03362	0.152132
Krcc1	2.99137	0.152363
Snrpg	2.99893	0.1532
Hspb1	-2.92151	0.153282
Prelid2	-3.03019	0.153282
Rps17	-3.01161	0.153282
Tkt	-2.51744	0.153282
Rab25	-2.78901	0.153843
Hpdl	2.59727	0.153991
Pou2f3	-3.03585	0.154133
Smox	-2.35629	0.154133
Pus1	2.96362	0.154914
Sgk1	2.75922	0.155104
Parp2	-1.65519	0.155193
Tgm5	0.0206226	0.155193
Ubtf	-0.974046	0.155562
Bloc1s1	2.7482	0.156678
Rnf167	-3.02614	0.157021
Ankrd22	-3.03364	0.158759
Oxct1	-2.82674	0.159089
Nt5dc1	-3.03465	0.159658
Zyg11b	2.79378	0.159658
Tmbim6	-2.8775	0.159675
Helq	1.97132	0.16071
Dctn2	-3.00538	0.160846
Raly	-2.96285	0.161081
Pde12	2.83796	0.161227
Adam17	2.47774	0.161929
Slc9a3r1	1.57069	0.161929
Tor3a	-3.02915	0.161929
Apoc1	-2.37235	0.162244
Bzw2	-2.97532	0.162244
Eif3m	-2.95913	0.162244
Tnfrsf22	2.47551	0.162582
Lypd6b	-2.20244	0.162722
Hspa1b	2.63278	0.162806
Fam83h	0.182172	0.163237
Fabp6	1.72499	0.163974
Csnk2b	-2.69969	0.164892
Iscu	2.93598	0.164892
Msl3l2	1.79364	0.164977
Ewsr1	-2.89848	0.165096
Otud1	1.51689	0.165096
R3hdm4	-2.3605	0.165096
Zfp637	2.83634	0.165793
Exoc5	1.96566	0.16677
Gtf2a2	2.94987	0.16677
Rac1	-2.9719	0.16677
Sugt1	-2.85959	0.166864
Mafb	-2.76052	0.1674
Ndufa12	2.89491	0.167647
Hsd17b12	0.425296	0.167737
Rlf	2.82409	0.167737
Atp6v1c1	-2.42989	0.167873
Tnfaip8	2.72525	0.168294
Tubgcp2	-3.00488	0.168294
Mki67	2.55574	0.168477
Jmjd8	-2.85086	0.169912
Zbtb7a	2.44502	0.170267
Itgb3bp	-2.99847	0.170662
Cct3	-2.95201	0.170756
Tmem60	2.91753	0.170835
Mbd3	2.88468	0.171195
Smarca4	-2.7204	0.171195
Fth1	-2.93961	0.171391
Mettl22	-2.98977	0.171591
Tnfaip8l1	2.64356	0.17189
Gm14295	-2.99116	0.171961
Rcor1	-2.94506	0.172027
Tmem50a	-2.9429	0.172507
Smyd2	-2.981	0.172595
Cdk8	-1.96146	0.172686
Prdx6	-2.94953	0.172774
Atp5k	2.81801	0.173204
Nol12	2.87079	0.173204
Sh3glb1	-2.95512	0.173204
Usp34	-2.76854	0.173204
Ak4	-2.77927	0.174719
Arrb2	-2.9118	0.174719
Ccdc47	-2.94817	0.174719
Ndufa4l2	-2.93421	0.174719
Ndufb4	-2.81044	0.174719
Psap	-2.88157	0.174719
Rbm39	-1.9341	0.174719
Snx17	-2.54319	0.174719
Tbc1d15	-2.42148	0.174719
Tpmt	-2.9118	0.174719
Vezt	0.304598	0.174719
Phospho2	2.49789	0.175279
Rad52	2.59514	0.175279
Wipi2	-1.154	0.175523
Kif1c	2.42876	0.175743
Mfn1	-2.94658	0.175743
Mocs2	-2.90615	0.175875
Fastk	-2.96663	0.176062
3110043O21Rik	1.71268	0.176116
Acp1	-2.62574	0.176615
Arpc1a	-2.25371	0.176615
Clcn6	NA	0.176615
Cpne2	-0.879037	0.176615
Ehd4	2.71326	0.176615
Fkbp3	-2.92676	0.176615
Gdi2	-2.93249	0.176615
Gemin4	NA	0.176615
Ghdc	-2.94775	0.176615
Ltbp1	NA	0.176615
Lyrm2	2.54517	0.176615
Msh5	NA	0.176615
Neto2	NA	0.176615
Pomk	-0.879037	0.176615
Serpina3j	NA	0.176615
Soga1	NA	0.176615
Atxn3	-2.9722	0.176641
H2-D1	2.4404	0.176925
Cox16	-2.96888	0.177117
Endog	2.85675	0.17797
Sf3b1	0.186013	0.178513
Apba3	-1.86564	0.179409
Gjb5	2.69426	0.179409
5930412G12Rik	2.82474	0.18011
Ago4	-2.89938	0.180801
Mrpl30	0.055048	0.180801
Cox6b1	2.83381	0.180933
Ilvbl	-2.71202	0.180933
Cd320	2.27837	0.180954
Hscb	-2.49886	0.180954
4930402H24Rik	-2.90591	0.181541
Hnrnpa0	2.76656	0.181541
Il22ra2	-2.90591	0.181541
2610528J11Rik	2.87372	0.181804
Selenbp1	-2.93063	0.182425
Haus3	1.69444	0.182684
2810004N23Rik	1.55778	0.18269
Amn	NA	0.18269
Cyp4f17	NA	0.18269
Dpysl3	NA	0.18269
Fign	NA	0.18269
Gm3604	NA	0.18269
Jak2	2.47854	0.18269
Klhl10	NA	0.18269
Oser1	2.68493	0.18269
Pced1b	NA	0.18269
Rbm6	-2.93617	0.18269
Rnf152	NA	0.18269
S100a3	NA	0.18269
Xrcc2	NA	0.18269
Zfp473	NA	0.18269
Ldhb	0.377896	0.182975
Stt3a	2.77463	0.182991
Pih1d1	-2.89294	0.183025
Sh3glb2	-2.93176	0.183178
Mettl3	-2.92679	0.184438
Prkd2	-2.92679	0.184438
Gatc	2.72219	0.185115
Hoxc9	2.3566	0.185115
Myg1	-1.12794	0.185115
Gpd2	0.618369	0.186574
Ift22	2.72627	0.186754
Smurf2	-2.53149	0.186806
Figf	-1.31744	0.186833
Golga1	-2.8647	0.187895
Akr1b8	-2.75878	0.188864
Kdf1	2.78523	0.189022
2310022A10Rik	1.21427	0.189133
Slain2	-2.83996	0.190149
Ttyh3	-2.91982	0.190149
Sars	-0.221981	0.191031
Cox7a2l	2.33992	0.192119
Nme2	2.62831	0.192119
Vrk3	-2.91866	0.192352
Ap3m1	0.741527	0.192714
Krt1	-2.14439	0.192714
Cops4	-2.89571	0.192922
Cdca4	2.2286	0.193272
Inha	-2.49126	0.19338
Gabarapl2	-2.63857	0.193402
Mthfd1	-2.89257	0.194535
Taf6	-2.6334	0.194877
Timm10b	2.78013	0.194877
Sft2d1	-2.88797	0.195431
Chrac1	2.70538	0.196062
Prpf40a	-2.86588	0.196062
Zbtb21	2.67379	0.196062
Capzb	-2.86481	0.198005
2410004B18Rik	-0.280245	0.198058
Ociad1	-2.87283	0.198058
Rybp	2.49448	0.199065
Atp5c1	-2.82723	0.199067
Cipc	1.56511	0.199067
Erp44	-2.74837	0.199067
Sdccag3	2.46244	0.199409
Paox	2.03724	0.200294
Exosc5	-2.25661	0.200379
Atp5g1	-2.85418	0.20095
Nop58	-2.67284	0.201858
Snx1	2.67455	0.202197
Chpf	2.27021	0.203084
Tmem159	2.53828	0.20329
Pi4k2a	-0.991312	0.203453
Mapk1ip1l	2.24674	0.204159
Ccdc115	-2.81215	0.204679
Fam83d	2.67265	0.204679
Ghitm	-2.86553	0.204679
Slc7a6os	-0.304075	0.204679
Net1	-2.8258	0.205045
Defb1	1.78057	0.205598
Abca7	1.99651	0.20647
Fryl	-1.35485	0.20647
Ip6k2	-2.87458	0.20647
Tmem9b	2.60695	0.20647
Dap3	-2.69226	0.206533
Cggbp1	2.25958	0.206546
Ctnnbip1	2.80447	0.206546
Hps4	2.44767	0.206546
Pop1	2.67338	0.206546
Pttg1	-2.24577	0.206546
Uchl3	-2.84888	0.206546
Ets2	-2.7205	0.207278
Hgs	-2.41042	0.207278
Vangl1	2.6963	0.207278
Actr3	-2.8344	0.208014
Cir1	2.69978	0.208014
Fbln1	2.54692	0.208014
Rps9	-2.83315	0.208014
Prep	1.72171	0.208076
Tmem218	-2.23957	0.208076
Med22	-2.7291	0.208465
Cables2	2.60418	0.208922
Mak16	2.57967	0.208933
Fuom	1.90297	0.208967
Fkbp1a	-2.56865	0.209507
Galnt11	-2.84436	0.209507
Alg8	2.47468	0.209937
Dcun1d5	1.15138	0.209937
Lap3	-2.50642	0.209937
Hirip3	2.64945	0.210369
Vopp1	-1.62012	0.210369
Psmc4	-2.82318	0.211369
Fam193a	-2.86537	0.211483
Tbcd	-2.82522	0.211796
Mtpap	2.73122	0.213229
Agk	1.44248	0.214
Col4a1	-0.671556	0.214042
Camk2g	-2.85672	0.214254
Nrbp2	-2.62845	0.21486
Uvssa	-1.10558	0.21486
2010107E04Rik	2.7687	0.214878
Dolk	-2.83451	0.215829
Sbk1	2.52259	0.215829
Stk16	2.768	0.215829
Tspan13	-1.11836	0.216381
Asxl2	2.40655	0.217141
Ppp5c	-2.81761	0.217141
Lrp6	2.7376	0.21715
Ankzf1	-2.83161	0.217489
Msantd4	2.60708	0.217709
Tyro3	1.62746	0.217709
Sh3bp4	2.43025	0.219051
1700037H04Rik	-2.7369	0.219099
Zfp329	2.69414	0.219882
Srpk2	-2.72442	0.220341
Fam178a	-0.0812691	0.220746
Manf	2.35569	0.220746
Rbm7	2.7788	0.220746
Rxrb	-2.84002	0.220746
Mansc1	1.94537	0.220843
Aven	2.49801	0.221133
Psmb7	-1.84589	0.222318
Tsc22d2	0.330875	0.222318
Cdc37	-2.40232	0.222646
Golga7	-2.45157	0.222646
Kctd2	-2.80091	0.222646
Trp53bp2	2.52792	0.222646
Psmd14	-2.76199	0.223114
Zswim3	2.41983	0.223114
Bphl	-2.40321	0.223189
Cdr2	2.58354	0.223189
Khk	-2.81702	0.223662
Adck1	2.52383	0.225814
Ppa1	-2.11218	0.225814
Pdcd2	-2.68772	0.226163
Mrpl4	2.22269	0.226477
Mfsd5	2.73356	0.227043
AI597479	2.51945	0.228194
Arhgdib	-2.64082	0.228203
Tmem209	-2.81529	0.229498
Tle3	1.15953	0.229627
1190007I07Rik	2.38546	0.230435
Kat5	0.986073	0.230435
Med11	1.47294	0.230853
Pdlim7	-2.65075	0.231306
Phrf1	2.46192	0.231401
Snapc3	-0.131478	0.231401
Fam208b	2.5771	0.233125
Gatad1	0.931497	0.233638
Nop16	2.74301	0.233667
Rpl23a	2.55787	0.23373
Dusp19	2.32679	0.233816
Klc3	-2.52272	0.234134
B9d1	2.64502	0.23432
Tspan5	-2.63121	0.23432
Grk6	-2.72373	0.234357
Nudt18	2.58975	0.234441
Ado	1.88384	0.234733
Utp23	1.62242	0.234875
Chchd7	2.25348	0.235669
Kcna1	-2.7459	0.235797
Papss1	-2.77142	0.236589
Rtkn	-2.5254	0.236589
Pa2g4	-2.26985	0.238113
Mcfd2	-2.51169	0.238852
Rps6ka4	-2.46357	0.2393
Ostc	-2.57461	0.240106
Limd1	-2.68271	0.240531
Atg4b	-2.72551	0.240657
Cct5	-2.35488	0.241082
Dusp3	2.41007	0.24351
Pik3ip1	2.41007	0.24351
Usp43	2.41007	0.24351
Bcl9l	2.66993	0.2438
Haus6	2.40269	0.243853
Ckap4	2.52455	0.24467
BC017643	-2.77543	0.244992
Pdcl	2.66055	0.244992
Tob1	2.00539	0.244992
Ppp4r2	2.31231	0.245205
Manbal	-2.71713	0.24526
Cyba	0.173716	0.245358
Cdc37l1	1.35702	0.245522
Tubb2b	1.26724	0.245522
Uhmk1	-2.61816	0.245522
Col12a1	-2.65186	0.246165
Ehd2	-1.96879	0.246211
Mff	-2.64829	0.246211
Psmb5	-2.17773	0.247298
Vps36	-2.73739	0.248038
Siah1a	2.105	0.248102
Bmp7	-2.65269	0.248157
Timm9	2.53768	0.248157
Lamtor4	2.41085	0.248636
Tcerg1	-2.65367	0.249039
Cst3	-2.56393	0.249318
Nfu1	-2.50357	0.24949
Cc2d2a	-2.65786	0.249621
2310057M21Rik	2.5214	0.24994
Barx2	1.41141	0.24994
Pdcd5	-2.60501	0.24994
Ubl3	-2.75152	0.25032
Zfp518a	2.33811	0.250503
Gsk3a	-2.6592	0.251428
Nuf2	1.48678	0.251428
Saysd1	2.66887	0.251428
Sgk3	-1.87027	0.251428
Smc3	-2.31729	0.251428
Thbs1	-2.61447	0.251428
Dnlz	0.794854	0.25185
Aip	-2.5416	0.251915
Eif5b	2.62971	0.251915
Strn4	-2.71517	0.252311
Acbd3	2.62799	0.252409
Mrfap1	2.4803	0.253919
Parn	-2.66234	0.253919
Thumpd1	2.41793	0.254369
Hspbap1	2.00772	0.254474
Plk1	-1.50013	0.254474
Snx2	-2.66184	0.254474
Lrrfip2	-1.38173	0.25488
Acbd6	-2.4649	0.255455
Trak1	-1.03494	0.25646
Cars	-2.55658	0.256982
Ddx1	-2.71865	0.256982
Hsp90aa1	2.26073	0.256982
Pts	-2.51405	0.256982
Fam45a	1.09158	0.257448
Fubp1	1.59239	0.257448
Hspa13	2.57858	0.257448
Kif18a	1.09158	0.257448
Minos1	2.6181	0.257448
Msmo1	1.85865	0.257448
Slc35a3	2.4407	0.257448
Stk25	-1.73952	0.257448
Dbt	2.65212	0.257611
Zfp830	2.11683	0.257611
Ppp1r12b	-2.65688	0.257852
2300002M23Rik	NA	0.25808
Acad12	NA	0.25808
Aoc2	NA	0.25808
Arhgap12	0.550504	0.25808
Armc2	NA	0.25808
Cbx5	-2.10603	0.25808
Cdc42ep2	NA	0.25808
Cdc42ep3	NA	0.25808
Cyth1	2.07928	0.25808
Dync1i2	-2.7237	0.25808
E2f8	-2.72339	0.25808
Glcci1	NA	0.25808
Gm10094	2.51459	0.25808
Gm16740	NA	0.25808
Gp1bb	NA	0.25808
Grasp	-2.66888	0.25808
Ifrd2	2.67137	0.25808
Igdcc4	NA	0.25808
Mcc	-2.7198	0.25808
Mypop	NA	0.25808
Nprl2	-2.61667	0.25808
Ppia	-2.6994	0.25808
Rab11fip1	NA	0.25808
Rab42	NA	0.25808
Rnf32	NA	0.25808
Slc39a8	-2.06785	0.25808
Smim22	2.47982	0.25808
Tha1	NA	0.25808
Tmod4	NA	0.25808
Ube2b	-2.7038	0.25808
Zfp874b	NA	0.25808
Rmnd5b	-2.71025	0.258374
Dsg2	2.15326	0.25894
Imp4	1.6155	0.259705
Galnt1	-2.70257	0.259865
Grpel2	2.55969	0.259865
Slc44a2	-2.21934	0.259865
Eif3h	-2.18012	0.260069
Plod2	-2.33223	0.260167
Ppp2r3a	-2.04583	0.26026
Tbc1d7	-2.54455	0.26026
Calcoco1	-2.70582	0.260661
Gpx4	-2.54669	0.260661
Mcm6	0.0327728	0.260661
Pink1	1.645	0.260661
Prr15l	-2.70582	0.260661
Shoc2	0.0711194	0.260661
Timm8b	2.54248	0.261506
Tspan14	-2.39597	0.261779
Clasp2	2.32236	0.261871
Npat	2.16068	0.261871
Ogfod2	2.51169	0.261871
Sdhaf2	2.54592	0.262127
Tnk1	-2.71126	0.262589
Ifi30	2.31106	0.263496
Thnsl1	1.93008	0.264517
Lrrc59	-2.46984	0.265
Kdelr1	-2.67487	0.265443
Zkscan17	2.44795	0.265443
Clpp	2.53868	0.265836
Fam101b	2.45916	0.265836
Ak2	-2.36107	0.26726
Hnrnpa2b1	2.41225	0.26726
Rab3d	-2.688	0.26726
Hells	0.869568	0.267275
Acvr2b	0.748102	0.26736
Fig4	-2.65388	0.267966
Ankrd40	2.07898	0.268106
Brd8	-1.21951	0.268106
Ino80d	-1.76162	0.270297
Ap1m1	-1.26168	0.270857
Ing5	-1.66195	0.270857
Phlpp1	-1.66195	0.270857
Ppp2cb	-2.28896	0.270857
Mcts2	2.5935	0.271352
Katna1	-1.79514	0.271629
Abhd17a	-2.2905	0.27192
Prpf19	-2.67828	0.27192
Pttg1ip	-2.69095	0.27192
4930430F08Rik	-2.69459	0.272638
Socs4	2.53622	0.272917
Gmppa	-2.69573	0.272919
Ldb1	-2.51068	0.272934
2610001J05Rik	2.63776	0.274797
Csnk1d	-2.03838	0.274797
Zfp768	2.45487	0.274797
Smarcad1	0.786078	0.275256
Amd1	2.59279	0.275702
BC037034	-2.6937	0.275702
Gmppb	2.20339	0.275702
Ptbp3	-1.94187	0.275702
Serpina3i	-2.68746	0.275702
Thg1l	2.31773	0.276017
Pinx1	2.53896	0.276371
Hlcs	-2.68816	0.277238
Ankrd13a	-1.60631	0.277287
Dedd	0.362584	0.277638
Sirt2	-2.62365	0.278694
Dnaja1	2.62513	0.278895
Nat6	2.35572	0.279903
Polr2f	2.39014	0.279919
Rps21	2.64889	0.279919
Pdap1	-1.20205	0.281023
Ell	2.44613	0.28144
Hadh	-2.36393	0.281484
Pnrc2	-1.63413	0.28194
2810417H13Rik	-2.16061	0.282394
Dnpep	-2.66265	0.282394
Gtf3a	-2.65049	0.282394
Kctd1	2.53952	0.282394
Ppp1r14a	-0.892245	0.282394
Sdad1	-2.58193	0.282394
Sgol1	2.53164	0.282394
Mtmr11	-1.41529	0.28268
Aco1	2.08807	0.282689
Clstn1	-2.65343	0.282689
Spryd7	-2.66245	0.282689
Cpsf3l	-2.65645	0.282768
Cdk9	2.5395	0.283111
Robo1	-1.75305	0.283494
Rpl35a	-2.63842	0.283494
Dnph1	-1.65591	0.284348
Epha4	-2.65837	0.284348
Ptges3	-1.82688	0.284507
Cttn	-2.66535	0.284678
Smndc1	-2.18188	0.284678
Adora2b	2.46883	0.286073
AI987944	2.35338	0.286073
Blzf1	-1.33392	0.286073
Cbx7	2.35338	0.286073
Ccdc117	1.64227	0.286073
Fadd	2.43461	0.286073
Fam168b	-2.66526	0.286073
Gstt3	1.79021	0.286073
Ola1	-2.09629	0.286073
Ubap2l	-2.48564	0.286073
Usp7	-2.0996	0.286073
Dusp1	-2.66482	0.286108
Casc4	2.14264	0.288284
Cmc1	1.92677	0.288284
Jade2	2.14264	0.288284
Mettl16	2.36365	0.288284
Calm5	2.50503	0.288636
Etv6	0.889954	0.288636
Fkbp8	-2.02609	0.288636
Tex2	1.74836	0.288636
Mrpl48	-2.56958	0.288924
Smchd1	1.99214	0.289206
Wdtc1	-2.62621	0.289206
Rnase4	-2.5202	0.289239
Ndufb2	2.25888	0.29004
Leng9	2.41385	0.290901
Rbpj	2.16946	0.290901
Elovl1	2.56697	0.29153
Fgfbp1	2.2936	0.292055
Ywhae	-2.5118	0.292251
Lancl2	-1.77913	0.292759
Raver2	1.11572	0.292952
B3galnt2	-2.4356	0.293172
Med13l	-2.42801	0.293984
Rbm48	1.7394	0.294125
Rdh14	2.46623	0.294363
Pdcd6	2.17597	0.29473
Srp9	2.1211	0.294904
Tmem138	-2.37141	0.294904
Fkbp7	2.35073	0.295376
Lrfn1	2.35073	0.295376
Oas1f	-2.15447	0.295376
Stc1	-2.55034	0.295439
Use1	-2.2975	0.296682
Samm50	-2.62352	0.297487
Gpd1l	-2.58772	0.298775
Fat1	2.30989	0.299133
Park7	-2.158	0.299651
Sfxn3	-2.62946	0.299651
Fen1	2.27671	0.299662
Mettl21a	-2.5332	0.300559
Bad	2.54486	0.300624
Ascl2	-1.55092	0.300781
Cenpw	1.78208	0.300781
Fnbp4	-2.16095	0.300781
Gpt2	-2.20375	0.300781
Mrps30	0.975534	0.300781
Rnaseh1	2.35924	0.300781
Zdhhc12	-2.58888	0.300781
Mark3	-1.70927	0.302313
Rab35	2.53941	0.302313
Psmb4	-2.32541	0.302758
Rbbp8	-2.63133	0.303437
Cnot1	-2.55561	0.303716
Daxx	2.42789	0.303716
Jmjd7	-2.61927	0.303716
Sgpl1	2.19009	0.304102
Hypk	-1.30293	0.304344
Jagn1	2.56335	0.304912
Smyd3	-0.25299	0.305165
Adcy3	2.4114	0.305893
Smim4	-2.52498	0.305893
Ephb4	1.41325	0.305902
Lpcat3	0.880674	0.305902
Ormdl2	0.58564	0.306034
Pole4	-1.62879	0.306034
Oxsr1	0.509913	0.306788
Msi2	-2.46076	0.306988
Eno1	2.40908	0.307241
Bbc3	-2.59344	0.308519
Bap1	-2.61462	0.308784
Mmp2	2.1069	0.308784
Pomgnt2	2.44778	0.31043
Gng5	-2.39618	0.310699
Pgpep1	2.30794	0.311564
Mpp6	1.10384	0.311587
Adamtsl1	-2.22352	0.312292
Sephs2	2.45718	0.312292
Vapa	-2.57971	0.312292
Ctdspl	0.319166	0.312755
Dgka	-2.5919	0.312755
Elovl4	-2.19195	0.312755
Tars	-2.52791	0.313311
Mettl18	2.44849	0.314405
Rpf1	-2.09286	0.314405
Sod2	-1.79088	0.314405
Gins1	2.45023	0.314973
Zfp574	2.38551	0.314973
Commd8	-0.655599	0.314998
Derl1	2.1716	0.314998
Irs1	-2.42368	0.314998
Nedd8	1.32256	0.314998
Pex7	-2.32252	0.314998
Serpinb7	-2.52749	0.314998
Kcmf1	-2.24957	0.315329
Ppp6c	-2.01274	0.315534
Ube2k	-2.55258	0.315534
Snd1	-1.85496	0.315872
Mien1	-2.29428	0.315918
Srsf1	-1.73589	0.316047
Fcf1	-2.35751	0.317012
Ccdc166	1.70714	0.318171
Fbxo36	2.31318	0.318171
Nav3	-2.49553	0.318171
Zfp651	-2.49553	0.318171
Apoe	-2.59526	0.318418
Rae1	1.05714	0.318418
Trim13	2.29412	0.318585
2300009A05Rik	2.36929	0.319102
2700060E02Rik	-2.55311	0.319102
Adhfe1	NA	0.319102
Ak5	NA	0.319102
Ankrd55	NA	0.319102
Car11	NA	0.319102
Cep135	NA	0.319102
Cspg5	NA	0.319102
Ctnnb1	-2.5438	0.319102
Dact2	NA	0.319102
Doc2b	NA	0.319102
Dpp3	-1.77764	0.319102
Dyx1c1	NA	0.319102
Ehhadh	NA	0.319102
Eif4e3	NA	0.319102
Foxc1	NA	0.319102
Foxo6	NA	0.319102
Gatsl3	-2.47203	0.319102
Glb1l	NA	0.319102
Hey1	NA	0.319102
Htr1b	NA	0.319102
Kirrel	NA	0.319102
Man2b2	NA	0.319102
Mcmdc2	NA	0.319102
Myo1h	NA	0.319102
Nudt16l1	0.996956	0.319102
Oasl2	NA	0.319102
Rnf182	NA	0.319102
Rps16	-2.55685	0.319102
Ryr1	NA	0.319102
Tcf12	-2.01765	0.319102
Tmem176a	1.35683	0.319102
Tmem180	NA	0.319102
Upk1a	NA	0.319102
Zfp334	NA	0.319102
Zfyve21	-2.54175	0.319102
Sgta	-2.56512	0.319379
Atl2	2.3577	0.320356
N4bp1	1.19638	0.320356
Sema4c	2.3884	0.320356
Fam207a	2.31102	0.320589
Cactin	1.13357	0.32242
Gng2	2.32833	0.322538
Slc30a1	2.32833	0.322538
Ttll7	2.32833	0.322538
Twsg1	-2.55015	0.322538
Txnl1	-2.15697	0.322538
Vangl2	1.95232	0.322538
Exo1	2.23729	0.322863
Mapk14	-2.3683	0.323374
Mboat2	-1.39206	0.323374
0610012G03Rik	2.51637	0.323734
Cenpn	0.953047	0.323734
M6pr	-2.56247	0.323734
Reep3	-1.89877	0.323734
Rbfa	2.51235	0.32387
Rmi2	1.7591	0.324468
Dcaf12	-2.56693	0.324798
Prrc1	-2.42595	0.324798
Vars	-2.45082	0.3248
Serp1	-2.54644	0.325616
Eed	-2.33937	0.326475
Pi4kb	-2.48702	0.326475
Asf1b	2.04156	0.326773
Polr3k	2.43651	0.326773
Myo1b	2.40331	0.327529
Dohh	0.473267	0.328672
Slx1b	2.4077	0.328953
Shfm1	2.53116	0.32974
Fam53a	2.49404	0.330084
Map4k4	-2.36858	0.330084
S100a10	2.52944	0.330622
Rpl6	-0.224	0.330645
Tomm6	2.02614	0.330645
Dsp	-2.47202	0.331085
Cox7a2	2.42533	0.331985
Fbxo22	2.39071	0.332146
Nos3	1.87694	0.332146
Syt13	1.87694	0.332146
Kctd20	-2.55484	0.333719
Klhl36	2.31404	0.334241
Trib3	2.31404	0.334241
2700038G22Rik	2.26388	0.334763
Aktip	-2.48534	0.334763
Hagh	-2.53901	0.334763
Pla2g4f	-0.610539	0.336352
Rsf1	-1.06476	0.336352
Vgll3	-2.39992	0.336352
Acaa1a	-2.37713	0.336561
Hnrnpu	-2.51829	0.336642
Mea1	-1.25883	0.336802
Lrwd1	-2.2426	0.337205
Laptm4a	-2.46413	0.337505
Rps27	2.42097	0.337551
Gadd45g	-2.53278	0.338269
Samd1	0.362586	0.338269
Slc25a37	1.52056	0.338269
Dck	-0.706169	0.338391
Eid2	2.2131	0.338567
Tmed8	2.2131	0.338567
Uggt1	-2.38402	0.338567
Thop1	-1.95764	0.340135
Dhrs7	-1.70371	0.340684
Gsta3	-1.79874	0.340805
Mrps10	-2.45894	0.340805
Polr2k	2.42322	0.340805
Pum1	-2.26086	0.340805
Rbm22	-2.01345	0.340805
Ube2d1	2.44737	0.340805
Ndufaf3	1.73661	0.341393
Bmi1	2.30351	0.341959
Zfp579	2.3943	0.342031
Akirin1	-2.33857	0.342902
Ddx5	-2.16389	0.342902
Msantd3	0.466116	0.342902
Med6	2.35727	0.343231
Gnl2	-2.50791	0.344021
Nup153	2.24422	0.344021
Fam114a2	-2.48901	0.344253
Lama3	-2.52518	0.344532
Ubxn2b	0.449947	0.344718
Pcbp1	2.47959	0.344946
2010315B03Rik	2.34262	0.34516
Adprhl2	2.32523	0.34516
D15Ertd621e	-2.5169	0.34516
Phldb3	-2.52971	0.34516
Vps4a	-1.81443	0.34516
Sdf2l1	-0.278191	0.346808
Sumo2	-2.4961	0.347135
Rab21	-2.50491	0.347416
Klf3	2.38859	0.348233
Ngly1	-2.52515	0.348884
Atxn10	-1.89926	0.350441
Spint1	1.99592	0.350697
Anxa7	-1.27307	0.351032
Ggnbp1	-2.44122	0.351032
Gskip	2.33073	0.351032
Aacs	1.22348	0.35202
Atp5b	-2.29745	0.35202
Ddx20	2.3161	0.35202
Ttc3	-2.49796	0.353623
Cox17	2.37236	0.35381
Reep5	-2.32311	0.35381
Fam172a	-2.47595	0.354793
Malsu1	2.24014	0.354793
Yeats4	1.36742	0.354793
Marcks	2.16984	0.35495
Cant1	1.60009	0.355357
Selt	-2.24551	0.355357
Mast4	-1.7245	0.355375
Mpnd	-2.50501	0.356181
Atg4d	-2.19032	0.358585
Ctxn1	2.26907	0.358585
Dip2b	-1.50402	0.358585
Gata3	-1.721	0.358585
Pwp2	2.38001	0.358585
Rab27a	2.22663	0.358585
Surf2	-2.17197	0.358585
Sh3d19	-2.19082	0.359797
Hira	-2.29418	0.360764
Grrp1	2.2013	0.360838
B3gat3	0.0595667	0.360991
Mrps18b	2.0922	0.360991
Cep72	-1.24288	0.36183
N4bp3	2.22724	0.36183
Nt5c3	2.16951	0.36183
Rnpc3	-2.48544	0.36183
Sec11a	-2.47271	0.36183
Sirt6	-1.78213	0.36183
Txnl4b	-1.24288	0.36183
1700066M21Rik	2.36646	0.362459
Cdkn2c	-2.40055	0.364021
Elmo2	-2.48223	0.364021
Mcat	-1.64876	0.364021
Mkks	2.18605	0.364021
Ncor1	-2.39857	0.364021
Pvrl2	2.4254	0.364021
Tmem115	2.36715	0.364021
Plbd2	-0.439123	0.364669
1810013L24Rik	2.03234	0.364702
Abi2	2.34517	0.36525
Antxr1	-2.47667	0.36525
Cds1	-2.07403	0.36525
Itpripl1	2.34941	0.36525
Rab14	-2.20963	0.36525
Slc25a3	1.93338	0.366063
Snapc2	1.13691	0.366063
Irf6	-1.02579	0.366487
Tln1	-2.44659	0.366487
Ccdc77	-2.48951	0.367039
Chd2	-2.32199	0.367039
Dhx9	2.3023	0.367039
Slc5a3	1.57762	0.367039
Tec	1.57762	0.367039
Carm1	-2.46734	0.368251
4930558J18Rik	NA	0.368369
4933408B17Rik	NA	0.368369
6030443J06Rik	NA	0.368369
Aim1	-2.46389	0.368369
Alox12	-1.67619	0.368369
Bag5	2.34282	0.368369
Car12	-2.41067	0.368369
Cd74	NA	0.368369
Cdh4	NA	0.368369
Cnot10	-2.19557	0.368369
Dnah8	NA	0.368369
Efcc1	NA	0.368369
Eml1	NA	0.368369
Epm2a	NA	0.368369
Eri3	-2.28356	0.368369
Fanci	NA	0.368369
Glod4	-1.6484	0.368369
Gm10638	NA	0.368369
Herc3	NA	0.368369
Hist1h2ab	NA	0.368369
Hspa8	2.15505	0.368369
Kcnv1	NA	0.368369
Lag3	NA	0.368369
Man2c1os	NA	0.368369
Mfsd2a	-0.486081	0.368369
Mphosph9	NA	0.368369
Nab2	-0.948972	0.368369
Nck2	2.07445	0.368369
Notch2	2.33115	0.368369
Nptxr	NA	0.368369
Pctp	NA	0.368369
Ppig	1.718	0.368369
Rela	-1.06195	0.368369
Rtn4rl1	NA	0.368369
Srsf9	-1.63556	0.368369
Tfcp2l1	NA	0.368369
Tmlhe	NA	0.368369
Ttl	-2.47601	0.368369
Vsig8	NA	0.368369
Wdpcp	NA	0.368369
Wdr19	NA	0.368369
Glmn	0.65474	0.36867
Ndufs8	-2.06731	0.368876
Os9	-1.36158	0.368876
Polr2d	-2.41823	0.369022
Trpm7	-1.84615	0.370024
Ppt1	-2.44978	0.370246
Capn7	-2.4673	0.370981
Qpctl	2.11491	0.370981
Rorc	2.11491	0.370981
Bsdc1	-2.00398	0.371371
Stard4	1.98365	0.372459
Ttf2	-2.26162	0.372592
Rtn3	-1.4997	0.372692
Ngrn	2.32463	0.374166
Slc48a1	1.62744	0.374166
Atp5o	-2.42334	0.375063
Col4a3bp	-0.602822	0.375549
Guk1	2.29763	0.375549
Lrp1	-0.989343	0.375549
Trpm4	-2.36338	0.375549
Eprs	-2.37109	0.375656
Emp1	-1.82381	0.376571
Pcm1	-2.39975	0.376571
Cep170b	-0.283401	0.37658
Gorasp2	-1.43841	0.377373
Phf2	-2.16713	0.377373
Pno1	0.960358	0.377373
Rptor	-2.16713	0.377373
Srek1ip1	2.1013	0.377373
Zfp580	1.75651	0.377373
Med25	-2.37956	0.377862
Bag1	-2.16784	0.377999
Dennd5a	1.37234	0.378873
Wdfy1	1.37234	0.378873
Kras	-2.12087	0.379436
Traf7	-1.40603	0.379436
Cdv3	0.674366	0.379924
Cox5a	1.16878	0.379924
Hspb8	2.33286	0.379972
Bst2	2.31334	0.380274
Wdr83	-1.67904	0.380308
Repin1	2.23814	0.380705
Dusp11	0.907153	0.380802
Arih2	-2.4494	0.381041
Fam46a	-2.4239	0.381914
Tmem183a	-1.97646	0.381914
Stab1	-2.37486	0.383107
Dcaf17	-2.24056	0.383137
Pex6	2.05488	0.383281
Mxd4	-2.43062	0.383914
Kmt2c	-2.23863	0.384003
Tmem243	1.08111	0.384003
Tubb6	2.3091	0.384003
Tmem59	-2.03483	0.384433
Dnajc2	-2.42123	0.385838
Tfap2a	1.41405	0.386141
Gemin2	-2.15507	0.386643
Man1b1	-2.37663	0.38738
1700025G04Rik	-0.644793	0.387739
Tmem63b	1.96853	0.387739
Cd81	-2.353	0.387984
Wbscr27	-2.40546	0.387984
Cmc2	2.32724	0.388441
Traf2	-2.39765	0.388641
Bin2	-2.41975	0.388956
Nptn	-1.83151	0.388956
2210016F16Rik	2.34337	0.389453
Comt	2.34996	0.389453
Rad54b	2.1597	0.390145
Mrpl55	2.1028	0.390215
Zfpl1	-2.0382	0.390215
Dynlt1a	-2.39979	0.390308
Pmepa1	-2.33144	0.390638
Pcx	1.23093	0.390815
Slk	1.25942	0.391076
Ppp1r12c	-2.35912	0.391331
Msl2	0.593627	0.391681
Papln	-2.42783	0.391681
Rpp21	-2.13643	0.391681
Aspscr1	-1.9708	0.39234
Cdh7	-0.677049	0.39234
Fem1a	-2.11247	0.392942
Mdh2	-1.42908	0.392942
Rapgefl1	-2.15185	0.392942
Atp1a1	-2.10135	0.39403
Ide	-2.27837	0.39403
Chd1l	-2.41615	0.394475
Msh6	1.55266	0.394475
Vegfa	2.1583	0.394493
Ythdc2	0.790071	0.395522
Acads	2.34615	0.395646
Agpat4	0.183828	0.395646
Aurkaip1	2.38383	0.395646
Pnp	2.17498	0.395646
Diexf	2.02525	0.396372
Plgrkt	-2.18242	0.396796
Pja2	-2.37225	0.397343
Ppp1r13b	2.29074	0.397343
Tmem132a	2.23561	0.397343
Tigd5	-2.32754	0.397659
Csgalnact2	-2.38641	0.39843
Epc2	-2.25919	0.398568
Hnrnpk	-2.25218	0.398799
Dlx3	2.02049	0.399053
Maz	1.77003	0.399053
Tor1aip1	-2.30871	0.399053
Smim19	0.301014	0.399072
Rnf5	-2.40195	0.400205
Postn	-1.72325	0.400339
Rnf13	-0.159185	0.400565
Tle1	-2.16124	0.40098
Mtfmt	2.25782	0.402886
Trpt1	-2.34129	0.402886
Rrp9	-1.90818	0.403162
Top1	1.64684	0.403162
Pfdn5	1.98478	0.403461
Nme7	0.352493	0.403556
Flrt3	2.24038	0.403921
Il17rb	1.75299	0.403921
Ttc30a1	2.21296	0.403999
Wdr37	2.21296	0.403999
Cacfd1	-2.28664	0.404014
Npepps	-2.24242	0.405279
Atp5g3	1.23584	0.405794
Gm1673	-2.34026	0.405794
Ltn1	2.25098	0.405885
Bcl11a	1.7805	0.406284
Top2b	-1.82686	0.406284
Ska2	2.11119	0.406465
Abhd13	2.22353	0.406527
Nup85	-0.871094	0.406527
Snx18	1.84799	0.406527
Tstd1	1.88803	0.406527
Nr2c1	-2.16845	0.407075
Ndufa5	1.75066	0.407416
Phb2	-2.22366	0.407416
Pcsk4	-2.34552	0.407797
Ephx3	0.893769	0.407902
Recql	-1.12103	0.410869
Map2k4	2.3024	0.410926
Tmem101	-1.82495	0.412238
Rgma	2.30695	0.412494
Rrp12	0.0978642	0.413187
Tulp3	-2.34626	0.413318
Med20	-1.9638	0.415075
Cttnbp2nl	-0.764233	0.416246
Hnrnpf	2.06235	0.416246
Ap2a1	-2.35224	0.416632
Dscc1	-2.31016	0.416632
Ercc4	1.77255	0.416632
Nup88	-2.35273	0.416632
Ktn1	-2.19973	0.417351
Chpt1	-2.22262	0.418843
Cstf1	1.79715	0.418843
Elf3	2.22577	0.418843
Rnf25	1.66674	0.418843
Zfp553	1.73892	0.418843
Foxn1	-0.171544	0.41932
Ikzf5	1.91194	0.41932
Rnf19b	-0.190524	0.41932
Lig3	2.27292	0.419897
Wiz	-0.254796	0.419897
Rfx7	-0.685028	0.420594
Cdk19	-2.37447	0.420855
Yipf4	-2.11973	0.421054
Psmd8	-2.26391	0.421067
Cdc34	2.28855	0.421234
Dcaf7	-2.32091	0.421751
Ptpra	-2.3769	0.421751
Cyb5r1	1.39999	0.421814
Pdlim1	-1.77696	0.422877
Plscr3	-0.0745729	0.422877
Rai1	1.38303	0.422877
Wdr43	-2.08231	0.422886
Kif2c	1.56236	0.424976
Ccdc32	2.29689	0.42552
Kri1	-0.22609	0.426906
Pan2	-2.36309	0.426906
Ryk	-2.35423	0.426925
Prr3	-1.06888	0.427323
Atpif1	-2.12813	0.427674
Tnrc6a	2.16489	0.427691
Abhd10	-1.65924	0.427734
Arhgap8	1.91153	0.427734
Arntl2	1.91153	0.427734
Hinfp	1.91153	0.427734
Nfix	-2.30844	0.427734
Pcyox1l	1.91153	0.427734
Rrp36	1.99685	0.427734
Slc39a6	-2.36673	0.427734
Wbp1l	-1.67469	0.427734
Kif11	-1.62994	0.428259
Asb8	1.93001	0.428783
Snap47	-0.316457	0.428783
[truncated: 10,552 more rows]

## Sheet: HF WNThi
Gene ID	Z score (cKO/Ctrl)	False discovery rate
Nxt1	12.8063	8.32056e-29
Rpp25l	12.1747	6.27757e-27
Rpl35	12.2158	6.79737e-27
Mrpl43	11.8287	5.48495e-25
Rpl36al	10.0935	2.70067e-18
Hist3h2a	-8.99781	6.85393e-18
Krt5	-9.74043	1.44638e-17
Cxcl14	-9.52164	2.72778e-16
Rpl41	9.49784	3.34878e-16
Krt15	-9.33323	8.93654e-16
Krt14	-8.84793	2.38126e-14
Sar1a	9.06994	2.38126e-14
Mrpl46	9.09222	2.82305e-14
Mrps34	9.03464	3.11499e-14
Itm2b	-8.68285	1.67979e-13
Llph	8.66351	3.5435e-13
Hdgf	-8.21255	3.84655e-12
Stfa3	-5.89391	6.1697e-12
Gltscr2	-8.10789	9.32137e-12
Phax	8.23758	9.79993e-12
Polr2l	7.47096	2.24595e-11
Scand1	8.04539	2.47727e-11
Eif1a	7.94541	4.53913e-11
Atg101	7.94899	6.90062e-11
Ncl	7.83727	6.90062e-11
Rpl24	-7.79952	8.86783e-11
Gadd45gip1	7.63746	2.52076e-10
Npm1	-7.62738	2.77065e-10
Pop7	7.68653	3.60474e-10
Mrpl14	7.49485	9.55241e-10
Cct4	-7.34693	1.13873e-09
Tpgs1	7.3929	1.48136e-09
Apex1	7.38781	1.66109e-09
H3f3b	-7.34404	1.69647e-09
Krt17	-7.1971	2.4985e-09
Rrs1	7.3789	2.51065e-09
Fabp5	-6.77675	3.17654e-09
Lmna	-7.16915	3.17654e-09
Rpl3	-7.224	3.41708e-09
Cct2	-7.1101	4.37667e-09
Smarcd2	-7.07267	4.93549e-09
Eif3f	-6.60646	5.10858e-09
Ass1	-7.09227	5.33354e-09
Mbd2	-6.85862	8.71382e-09
Uqcrc1	-6.84676	8.94966e-09
Rbm15	6.59956	8.95999e-09
Mtch1	-6.85591	1.60102e-08
Anxa2	-6.82652	2.57208e-08
Exosc4	6.9534	2.57208e-08
Naca	-6.88363	2.57208e-08
Fam213a	-6.78278	3.03769e-08
Gnb2l1	-6.8497	3.03769e-08
H3f3a	-6.83198	3.34832e-08
Ywhah	6.82566	4.05724e-08
Gpatch4	6.8348	5.19825e-08
Txnl4a	6.7893	5.86763e-08
Mrps24	6.75205	6.05952e-08
Abt1	6.63185	7.29313e-08
Atp5f1	-6.56898	7.6673e-08
Nop10	6.64652	9.413e-08
Rps29	6.63734	1.00451e-07
Trim29	-6.52589	1.00451e-07
Lsm10	6.52187	1.05899e-07
Ccdc59	6.67859	1.07804e-07
Eif4h	-6.59059	1.23537e-07
Dynlrb1	-6.46332	1.33611e-07
Rpp38	6.48357	1.38732e-07
Btf3	-6.54928	1.60317e-07
Uqcr10	6.54034	1.62884e-07
Trp53	-6.17251	2.09915e-07
Tmem11	6.50376	2.9935e-07
Eif3e	-6.42166	3.02523e-07
Snrpb2	6.21494	3.07651e-07
Rpl7	-6.38842	3.97966e-07
Gimap9	6.13997	4.11782e-07
Pelo	6.44864	4.4079e-07
Uqcrq	6.25368	6.76141e-07
Ndufaf1	6.3599	6.83886e-07
Rp9	6.24615	8.53163e-07
Dnpep	-5.99585	9.1756e-07
Akr1a1	-6.00341	1.02639e-06
Emc6	5.8263	2.16516e-06
Hnrnpa1	-6.01944	3.12834e-06
Cdc42ep5	5.98442	3.17092e-06
Mrpl51	6.04678	3.17092e-06
Mad2l1bp	6.03587	3.25773e-06
Mrto4	5.90385	3.28662e-06
Tbcc	6.04597	3.31635e-06
Dph3	5.9053	3.6044e-06
Actr10	-5.89297	3.87036e-06
Socs2	5.54937	5.38046e-06
Eif3d	-5.83148	6.0028e-06
S100a16	-5.68586	6.16466e-06
Coa7	5.89219	6.75841e-06
Pttg1	-5.33699	6.75841e-06
Suclg1	-5.28347	6.75841e-06
Phlda3	5.8505	7.27197e-06
H2afy	-5.79578	8.80694e-06
Mpnd	-5.70805	8.9526e-06
Wdr18	5.1813	9.06965e-06
Hist1h1c	-5.3362	1.06588e-05
Anxa5	-5.62592	1.10463e-05
Med7	5.33577	1.18904e-05
Nt5dc2	-5.65351	1.18904e-05
Ppp1ca	-5.69277	1.40601e-05
Smim15	5.72407	1.4413e-05
Chchd1	5.71529	1.4512e-05
Nedd4	-5.26558	1.68136e-05
Rpl4	-5.66611	1.71413e-05
Arl4c	-5.48925	1.77903e-05
Rpl23a	5.6708	1.81626e-05
Eif4a1	-5.61314	1.81718e-05
Tecr	-5.63028	1.89237e-05
Dstn	-5.60468	2.01778e-05
Gnb1l	5.62942	2.1412e-05
Snn	-5.20483	2.23267e-05
Tomm7	5.58119	2.34186e-05
Pycard	5.00835	2.69848e-05
Trim27	5.4974	3.04917e-05
Eif3k	-5.44357	3.09129e-05
Arpp19	-5.52319	3.21731e-05
Pkp3	-5.48351	3.52909e-05
Psmd7	5.22747	3.52909e-05
Ptov1	-5.30468	3.65242e-05
Rrp15	5.55527	3.65242e-05
Sap30bp	5.28615	3.65242e-05
Mrpl36	5.42808	4.05147e-05
Rps27	5.28291	4.05147e-05
Rps7	5.47419	4.05147e-05
Tmem70	5.32567	4.19904e-05
Shfm1	5.45911	4.32617e-05
Oser1	5.4806	4.68403e-05
Tpt1	-5.44126	4.68403e-05
Cox7a2l	5.08955	4.73248e-05
Mrps12	5.40058	4.7383e-05
Krcc1	5.15671	4.79959e-05
Lsm14b	-5.25294	5.16089e-05
Ndufb10	-5.38026	5.16089e-05
Rpl18	-5.41678	5.16089e-05
Fdx1l	5.43555	5.28116e-05
Ccdc85b	5.42468	5.92262e-05
D8Ertd738e	5.31019	6.188e-05
Rps6	-5.37014	6.31117e-05
Rplp2	5.35821	6.66998e-05
Rbmxl1	5.37069	6.98076e-05
Cdk4	-5.14885	7.29072e-05
S100a14	-5.25537	7.66323e-05
Ash2l	-4.95706	8.12236e-05
Slc3a2	-5.20618	8.12236e-05
Rabac1	-4.8156	8.60543e-05
Mrpl12	5.27545	0.000103338
Ube2d3	-4.82184	0.000114007
Zfp292	5.27631	0.00011423
Eif4g2	-5.22319	0.000115728
Lgals1	-4.32708	0.000115728
Nudt2	5.21706	0.000115728
Raly	-5.18237	0.000115728
Nup50	5.24772	0.000129973
Nsmce2	-4.90079	0.000135253
Cdc37	-4.81178	0.000139154
Gtf2ird1	-4.14726	0.000146053
Prdx5	-4.98024	0.000157956
Aldh16a1	-4.5445	0.000167412
Rnh1	-5.0783	0.000172317
Pafah1b3	-4.74147	0.000173506
Prelid1	-5.11418	0.000180319
Fkbpl	5.16576	0.000188558
Mplkip	-5.04758	0.000189818
Khdrbs1	-4.94701	0.000191287
Rps19bp1	5.05725	0.00019442
Gemin7	4.93483	0.000249493
Ndufaf4	5.10707	0.00025053
Hoxc8	5.08973	0.000274616
Utp3	5.05021	0.000274616
Spop	-4.85701	0.000344333
Hist1h2bc	-3.67986	0.000347344
Bcam	-4.66835	0.000353803
Nudt19	5.02976	0.000355615
Rbfa	4.93784	0.000356161
Tmed2	-4.90663	0.000367423
Morf4l1	-4.8193	0.000396102
Perp	-4.94838	0.000396102
Atp5o	-4.92852	0.00040707
Cd9	-4.79903	0.000418579
Mybpc1	-4.49233	0.000418917
Sec62	4.86583	0.000429174
Sfn	4.54124	0.000430386
Ppib	-4.82095	0.000445062
Set	-4.91422	0.000447681
Eif3m	-4.87571	0.000457415
Nck1	4.95382	0.000461157
BC100530	-3.69065	0.000521738
Rpl14	-4.87716	0.00053914
Tbrg1	-4.53174	0.00053914
Brf2	4.65982	0.000559286
Golga7b	-4.73429	0.000566489
Luc7l2	-4.81814	0.000579342
Mrpl34	4.8788	0.000579342
Gapdh	-4.65268	0.000586494
Eif4b	-4.65561	0.000604761
Ppic	-4.50915	0.000619977
Pltp	-4.69782	0.000638874
Ssbp2	-4.77461	0.000656724
Med21	4.70437	0.000663796
Rpl22l1	-4.81797	0.000669318
Srsf5	-4.73231	0.000669581
Bmyc	4.79163	0.000690753
Reep5	-3.51049	0.000704109
Impdh2	-4.67264	0.000710087
1810058I24Rik	4.47148	0.000711423
Gdi2	-4.58643	0.000711423
Ndufb4	-4.58817	0.000711423
Nxf1	4.72815	0.00073558
Fam210a	4.8119	0.0008095
Psmb6	-4.70117	0.000825416
Fam168b	-4.41385	0.000834189
Cox8a	4.74431	0.000843351
Hspa5	4.56681	0.000843351
Atp5b	-4.70653	0.000868563
Imp3	4.75406	0.000874544
Mrpl20	4.75252	0.000890513
Dynll1	4.65818	0.000892431
Mrpl50	4.74513	0.000905345
Pkm	-4.62387	0.000905345
Alcam	-4.68021	0.000916111
Pdlim1	-4.71342	0.000917505
1700021F05Rik	4.7226	0.000917548
Acaa2	-4.5625	0.000917548
Fam162a	-4.7003	0.000932293
Prpf19	-4.68155	0.000979035
BC005561	4.72694	0.000992964
Atat1	-4.29829	0.000997632
Dctpp1	4.70913	0.00102164
Rhog	4.53458	0.00105836
Ece2	4.70576	0.00108854
2210016L21Rik	-4.57296	0.00112947
Zfp771	4.66895	0.00115305
Pcbp2	-4.65102	0.00117709
Ctbp1	-4.63954	0.00118217
Timm17a	4.65955	0.00121149
Nudt7	4.55622	0.00121432
Cope	-4.47178	0.001219
Ubxn1	-4.60672	0.001219
Rps3	-4.64719	0.00123277
Rpl13a	-4.64257	0.00125386
Ybx1	-4.57827	0.00129817
Cox14	4.53533	0.00136845
Atxn10	-4.35864	0.00146482
Rps3a1	-4.59977	0.00149761
Srp19	4.54952	0.00150067
Tigd2	4.59448	0.00157007
Timm13	4.2756	0.00162937
Smoc2	-3.95171	0.00163343
Stfa1	-3.3635	0.00170505
Rnf114	-4.49967	0.00184046
Eci2	-4.42525	0.00185717
Mrpl15	4.52544	0.00189921
Psmc4	-4.51941	0.00190977
Hnrnph1	-4.5023	0.0019627
Psmc3	-4.50279	0.0019627
Znhit2	4.5616	0.00203739
Arf6	4.52424	0.00208555
Sac3d1	4.41549	0.00209577
Hebp1	4.45559	0.00211143
Mcm6	-4.30454	0.00219721
Gnb2	-4.46545	0.00239603
Sdha	-4.35707	0.00248861
Hyal2	4.46111	0.0027977
Riok3	-4.17893	0.0027977
Capns1	-4.34816	0.00293302
Hnrnpul1	-4.30534	0.00293302
AU022252	4.37325	0.00293326
Coa3	4.24297	0.00295593
Igfbp2	-4.25153	0.00297395
Mettl3	-4.21917	0.00297395
Eif2s2	-1.98725	0.00298949
Lef1	-4.20242	0.00300598
Ucp2	-4.23305	0.00300598
Apoc1	-4.30894	0.00308278
Arhgdib	-4.37343	0.00308278
Eif5a	-4.34772	0.00308278
Ndufaf2	4.38816	0.00308278
Polr1d	4.3719	0.00308278
Capza2	-3.90335	0.00310555
Lmo1	-4.24907	0.00310555
Mtch2	-4.37317	0.00310555
Ythdc1	4.4048	0.00317586
Ywhae	-4.36031	0.00319434
Cbr2	-3.99731	0.00321334
Bzw2	-4.34972	0.0032601
Psma6	-4.19809	0.00334719
Rps5	-4.37071	0.00347828
Tmem261	4.31955	0.00351249
Dapl1	-3.80541	0.00354676
Mob4	-4.32137	0.00355385
Son	4.32963	0.00355385
Tradd	4.39525	0.00355385
Spr	4.299	0.00359855
Rgs12	-4.21829	0.0037075
Nisch	-3.94516	0.0037274
Oard1	-4.231	0.0037274
0610011F06Rik	4.36796	0.00397098
Tomm6	4.20604	0.00397098
Vav3	-4.13595	0.0040046
Kti12	4.36116	0.00405888
Mrpl57	4.34466	0.00405888
Eef1b2	-4.31898	0.00413858
Atg3	-3.92434	0.00420535
Gabarap	-4.30298	0.00421102
Tmem167	4.31708	0.00430695
Tmem100	4.03605	0.00434251
Cdipt	-3.93339	0.00454629
Pigyl	4.22463	0.00454629
Actn4	-4.18202	0.00455783
2310009B15Rik	-4.12114	0.00457419
Cyth2	-4.23742	0.00459372
Ndnl2	4.27744	0.00459372
Uqcrfs1	4.28582	0.00463038
Cox19	4.29633	0.00471209
Etf1	-3.69301	0.00474024
Use1	-3.83891	0.00476062
Ccnd3	-4.15515	0.0048609
Rpl10a	-4.26146	0.00499783
Ddx28	4.21106	0.00500763
Fam212a	4.19121	0.00500763
Plekhf2	3.83758	0.00500763
Ezh2	-3.63313	0.00504826
Pitpna	-4.163	0.00504826
Ahcyl2	-4.07685	0.00505129
Phgdh	-4.22859	0.00506422
Cops5	-3.94349	0.00529124
Lrrc42	3.97054	0.00529124
Gnai2	-4.14811	0.00533167
Cyhr1	-2.56134	0.00536074
Snx5	-4.20017	0.00545548
Hspa1b	4.23146	0.00561926
Polr2m	-4.18812	0.00561926
Col17a1	-4.1615	0.00563826
Ythdf2	4.10344	0.00570806
Anxa1	-4.12841	0.00586725
Ip6k2	-4.14959	0.00590808
Trmt10c	3.83072	0.00595627
Acat1	-4.11604	0.00608084
Prr7	3.77865	0.00608084
Lypla1	-3.87451	0.00622826
Ddb1	-4.02931	0.00623855
Vkorc1	-3.88905	0.00625872
Hist3h2ba	-4.05028	0.00631887
Psmd4	-4.17746	0.00631887
Cox4i1	-4.18511	0.00636333
Mrps18b	4.21536	0.00640114
Cox6a1	4.08666	0.00651283
Atpif1	-4.11632	0.00651404
Ckap4	4.12057	0.00651658
Gdpd1	-3.27233	0.0066603
Psmc5	-4.15117	0.0066603
Gabarapl2	-4.14593	0.00668035
Rnf25	4.10932	0.00668035
Ckb	-4.08209	0.00674795
Cdc42se1	-3.63691	0.00675729
Mrps7	3.71099	0.00684165
Zwint	-3.87739	0.00684165
Pnrc1	-3.24505	0.00698258
Hras	-3.71103	0.00702407
Tob1	4.07931	0.00703736
Tst	3.79591	0.00703736
Espn	-3.34107	0.00712177
Trim11	3.13742	0.00721693
Uqcr11	3.62514	0.00721693
Msantd3	4.13562	0.00728693
Ube2b	-3.54615	0.00728693
Gm20554	-3.80764	0.00730525
Nasp	-4.03651	0.00730525
Mrps33	3.52488	0.00740152
Ier2	-4.08086	0.00745006
Pebp1	-3.49532	0.00745476
Gorasp2	-4.06748	0.00750747
Edar	-3.51718	0.00766013
C1qbp	3.99836	0.00766454
Sparc	-3.95183	0.00767319
Bmp7	-3.75266	0.00779206
Rabgap1	-3.766	0.00789934
Atp5c1	-4.01085	0.00799701
Rpl8	-4.10596	0.00799701
Srsf9	-3.97587	0.00799701
Rraga	4.12548	0.00801447
Rpl7l1	-3.11372	0.00810475
6330403K07Rik	-3.77731	0.00822564
Mrpl16	4.06286	0.00822564
Mars	-3.94928	0.00829789
Pdgfa	-3.87905	0.00831066
Ell2	-3.93986	0.00858146
Eny2	-4.05251	0.00867624
Knop1	3.98557	0.00867624
Rpl18a	-4.06998	0.00899458
Smco4	4.09921	0.00910646
Cnn3	-2.36466	0.00929318
Rab14	-4.03884	0.00929318
Pyroxd1	4.06678	0.00935364
Psmd3	-3.96865	0.00941381
Psmd8	-3.66245	0.00941618
Ywhaq	-4.00371	0.00946647
0610010K14Rik	4.00579	0.00952977
Fen1	4.0482	0.00963528
Ogfrl1	4.03561	0.00976556
Tmem123	-4.00953	0.00976556
Fam32a	3.70901	0.0100302
Ccdc12	-2.84349	0.010322
Npc2	-3.46811	0.010322
Nhp2	3.62801	0.0103784
Fam136a	4.05309	0.0104351
Psap	-4.00325	0.0104716
Sars	-3.89329	0.0107797
Wnk1	-3.96283	0.0109361
Pck2	4.00855	0.010994
Ide	-3.6202	0.0109968
Med29	3.80571	0.0109968
Nudt21	-3.7871	0.0109968
Ccng2	-3.90052	0.0111201
Mgat2	3.90124	0.0111201
Parl	-3.93957	0.0111783
Snx17	-3.82051	0.0111813
Psmd6	-3.94926	0.0112056
U2af2	-3.76905	0.0113143
Zfp637	3.57413	0.0113171
Rsrp1	-3.97465	0.0113283
Sugt1	-3.95226	0.0113786
Vcp	-3.88041	0.0113786
Actl6a	-3.97468	0.0114959
Dynll2	3.89167	0.0116635
Pcbd2	-3.85112	0.0116635
Pprc1	3.88773	0.0116643
Zfp579	3.19001	0.0116672
Hnrnpu	-3.56052	0.0116902
Cux1	-3.29309	0.0118838
Lsm12	-3.7903	0.0120064
Hdac3	-3.91413	0.0122134
Dcn	-3.94521	0.0122236
Tmem27	0.849311	0.0122236
Cdc26	3.96202	0.0123234
Thoc6	-2.91196	0.0126453
Rpl17	-3.95447	0.01271
Evl	-3.87077	0.013064
Marcks	3.86694	0.0130964
Sco2	3.97024	0.0130964
Cops3	-3.88925	0.0131329
Trappc5	3.95765	0.0131329
Plin3	-3.86392	0.0132556
Lgals3	-3.72245	0.0136029
Leprotl1	3.86153	0.0136058
Psmb4	-3.89098	0.0136246
Ftsj2	3.40864	0.0139044
Ank3	-3.84216	0.0139155
Avpi1	3.84816	0.0139155
Mien1	-3.62863	0.0139155
Wtap	-0.569582	0.0140146
Ttc33	3.45218	0.0140481
Hmox2	3.82141	0.0141966
Rhoa	-3.75137	0.0145815
Eif3h	-3.90068	0.0146998
Naa35	-3.84738	0.0149729
0610009B22Rik	3.89655	0.0152252
Med18	3.86876	0.0153083
Cttn	-3.82448	0.0153533
Capg	-3.79104	0.015482
Nfkbia	-3.73249	0.0155343
Gtf2h5	3.71457	0.0156552
Slc15a2	2.72635	0.0156552
Pabpc1	-3.87605	0.0158562
Fam92a	-3.77796	0.0159198
Psmb2	-3.70891	0.0159793
Grpel2	3.82595	0.0161484
Suclg2	-3.56993	0.0162905
H2-Ab1	-3.70568	0.0163099
Katna1	-3.83191	0.0165337
Nabp2	-3.15437	0.0165337
Ap1b1	-3.54879	0.0165424
Cbr1	3.83637	0.0165424
Oxct1	-3.84784	0.0165761
Psmb1	-3.85248	0.0166321
Ssbp3	-3.80827	0.0166321
Spin1	3.72568	0.0170361
Rps13	-3.85419	0.0170523
Tk1	3.87602	0.0172184
Sostdc1	-2.28209	0.0173366
Pygb	-3.72284	0.0176047
Anapc15	3.85177	0.0176176
Atp5g1	-3.74711	0.01765
Mrps23	3.61817	0.0184727
Tax1bp1	-3.73515	0.018707
Mdh2	-3.80798	0.018717
Ube2d2a	-3.2057	0.0188312
Dse	3.80837	0.0188602
Dazap1	-3.73865	0.0189491
Cbx2	3.28494	0.0190824
Gmps	-3.62334	0.0190824
Mdh1	-3.6199	0.0190824
Nusap1	-3.05878	0.0190824
Tnfsf9	NA	0.0190824
Zbed5	NA	0.0190824
Dap	-3.76157	0.0195606
Dazap2	-3.78045	0.019865
Ndufv2	-3.68342	0.019865
Mcts2	3.10563	0.0198727
Rnf149	-3.74564	0.0199454
Clp1	3.80391	0.0201638
Ngrn	3.13654	0.0202654
Chchd2	-3.72424	0.0203852
Ppp1cc	-3.78282	0.0203852
2310036O22Rik	3.76518	0.0205232
Oma1	3.80498	0.0210088
Psmd13	-3.47956	0.0210088
Basp1	3.60965	0.0212764
Trim28	-3.68064	0.0212764
Eid1	-3.61887	0.0216338
Fdps	3.5709	0.0216338
Cct8	-3.45982	0.0217765
Tpd52	-3.59618	0.0219531
Tmem238	3.73982	0.0221267
Ddx5	-3.71682	0.0222267
Rpl23	-3.76162	0.0223855
Kitl	-3.61847	0.0224319
B3gnt8	3.72517	0.0226622
Rab7	-3.69113	0.0228106
Glrx5	3.64543	0.022882
Ctxn1	3.77005	0.0231872
Grina	-3.61442	0.0232914
Ldb1	-3.70885	0.0235447
Uqcrh	-3.67385	0.023554
Aarsd1	2.94029	0.0237235
Bcl11b	-3.69345	0.0237235
Cox7c	3.73315	0.0237235
Dync2li1	-3.51837	0.0238575
Hoxb6	3.73824	0.0239061
Reep3	-3.54717	0.0241904
Fam83d	3.57653	0.0242265
Mxra7	3.66964	0.0242465
Fkbp1b	-3.26991	0.0244503
2410016O06Rik	3.34472	0.0244831
Gnas	-3.72236	0.0246501
Rpl30	-3.72539	0.0247036
Rps2	-3.72258	0.0249171
Bckdha	-3.56531	0.0252062
Ube2s	-3.63951	0.0252062
Cfdp1	-3.63475	0.0253631
Aqp3	-3.52367	0.0264475
Manbal	-3.65377	0.0264475
Odc1	-3.64467	0.0269769
Rab1b	-2.10166	0.0269769
Myo10	2.27301	0.0270168
2810004N23Rik	3.51885	0.0274271
Immp1l	-3.38128	0.0278264
Pdk1	-3.09762	0.0278264
Sox4	-3.63506	0.0278264
Ubxn4	-3.39592	0.0278264
Cisd2	-3.59809	0.0278646
Mta2	-3.34022	0.0278646
Sf3b5	3.6809	0.0278646
Rps19	-3.68157	0.0279614
Ap1m1	-3.58338	0.0279732
Cnih4	-2.69615	0.0279732
Psmc1	-3.63472	0.0279732
Terf2	1.44765	0.0279732
Spint2	-3.54101	0.028183
Usp7	-3.45945	0.0283897
Idh3b	-3.55312	0.0285692
Tmem126a	-2.82934	0.028683
Atp5a1	-3.66631	0.0286984
Ube2g2	-3.61167	0.028901
Eef2	-3.61539	0.0289171
Mtcl1	-3.51749	0.0293235
Calm4	-3.519	0.0297661
Rrp1	-3.45567	0.0298161
Hook3	-3.49659	0.0298361
Tmem131	-3.35629	0.0298361
Dynlt1a	3.49254	0.0299528
Ptges	-2.99884	0.0301466
A730017C20Rik	-3.19904	0.030165
Rps21	3.49382	0.030165
Ost4	3.65495	0.0301827
Ugp2	-3.31852	0.0301978
Tmem97	3.66214	0.030202
Bola2	3.47864	0.0303218
Ppp3cb	-3.56201	0.030606
Spryd4	3.43468	0.030762
Pdcd5	-3.02096	0.0310483
Atp6v1g1	-3.34521	0.0310802
Fxn	3.26124	0.0316192
Ppp1r36	-2.68498	0.0327398
Jup	-3.56556	0.0329778
Map1lc3a	-3.59109	0.0334638
Tor1aip2	-1.32057	0.0334638
D930048N14Rik	-3.27427	0.033469
Hspd1	3.58516	0.0338054
Anapc5	-3.07559	0.0338419
Eva1b	3.292	0.0338812
Hdac1	-3.43665	0.0338812
Golga2	-3.41607	0.0339719
Tspan5	-3.44763	0.0339719
Zfp667	-1.81857	0.03439
Mt1	-3.40403	0.0344677
Itm2c	-3.57943	0.0349449
Acp6	-3.48989	0.0350139
Btbd2	-3.48678	0.0352551
Pvrl1	-3.47557	0.0352578
Anapc13	3.56791	0.036116
Gnai1	-3.49855	0.03626
Rbm7	2.71344	0.0364884
Polr2h	3.53636	0.0368089
Ewsr1	-3.56619	0.0368215
Nit2	-3.38049	0.0368914
Mrpl54	3.19604	0.0369967
Psma2	-3.56474	0.0377025
Rps27rt	3.48593	0.0377025
Smek2	-3.51862	0.0377025
Eif3c	-3.39414	0.0378952
Gtf2i	-3.52626	0.0378952
Tspan3	-3.51516	0.0378952
4930523C07Rik	2.3978	0.0384679
Bag6	-3.4525	0.0384679
Gm7008	0.504364	0.0384679
Mrpl19	3.21803	0.0385211
Eif3g	-3.50647	0.0389223
Rtn1	3.29	0.0395301
Eif4ebp1	3.5662	0.0396246
Xrn2	-3.52109	0.0399964
Mat2b	-3.07468	0.0400873
Zw10	1.1678	0.0404387
Cdk2ap2	-3.49879	0.0404568
Qdpr	-1.68902	0.0406606
Dlgap4	-3.25715	0.0407584
B2m	-2.97494	0.0408922
Mrps17	3.53414	0.0408922
Prdx2	-3.21665	0.0408922
Pdia4	3.53866	0.0413399
Chchd5	3.53297	0.0414912
Gas2l1	-1.69506	0.0416876
Echs1	-3.51098	0.0421545
Nsmce1	-3.48753	0.0423536
Rpusd4	-3.34924	0.0423881
F2rl1	3.46785	0.0425256
Glmn	-3.29436	0.0425256
Prss23	3.32103	0.0425256
Xrcc5	-3.39016	0.0434796
Rnf113a2	3.53636	0.0435489
Sp5	3.41893	0.0435818
Wbp2	-3.26307	0.0436334
Ap2m1	-3.47275	0.0437843
Rps18	-3.51265	0.0439205
Mrps18a	3.40096	0.0441639
Dync1li2	-2.71816	0.0442129
H2afj	3.42134	0.0442129
Luzp1	3.24916	0.0442129
Pde9a	-3.2135	0.0443286
Pgpep1	3.51918	0.0444122
Rgs2	-3.49016	0.0445995
H2afx	-3.44567	0.0446711
Tmbim4	-2.58205	0.0446711
Rbm48	3.50665	0.0450053
Lsm14a	-3.16091	0.0450171
Dtnb	-3.37039	0.045306
A430005L14Rik	3.37823	0.045507
Fkbp4	-2.9345	0.045507
Atf5	-3.06416	0.045562
Hpgds	-3.39733	0.045562
Trim13	3.42982	0.045562
Deb1	1.70586	0.0456161
Gsto1	-3.40341	0.0456546
Pbrm1	-2.84386	0.0457957
Psmb5	-3.48513	0.0459661
Selt	-3.46044	0.0460376
Akirin2	-2.69881	0.046246
Hnrnpul2	-3.45086	0.0462563
Orai1	3.46837	0.0462563
Ryk	-3.46562	0.0462563
Tmem203	3.39462	0.0462563
Ivns1abp	-3.38105	0.0464228
Psmb3	-3.29909	0.0465657
Atp1b1	-3.01995	0.0468718
Sirt2	-3.36144	0.0473154
Rps23	-3.47578	0.0474784
Ube2e1	-3.38224	0.0474784
Timp3	3.40837	0.0476428
Rbbp4	-3.45112	0.0479043
Naa38	-3.38958	0.0487244
Zfyve19	-2.50799	0.049258
Prkrir	3.33411	0.0501823
Ptprf	-3.40225	0.0501823
Esd	-3.38117	0.0505779
Hnrnpll	-3.37346	0.0505779
Spsb2	3.39706	0.0507012
Fkbp3	-3.39988	0.0508747
Lancl1	-2.58425	0.050906
Flrt3	3.2338	0.0509748
Glrx3	-3.2756	0.0509748
Nat6	3.19432	0.0509748
Psmc6	-3.29507	0.0509748
Matk	NA	0.0513855
Rad51c	-1.79836	0.0519724
Dek	-2.23337	0.052154
Apoe	-3.10984	0.0522428
Cabp1	-3.28775	0.0522428
Pramef8	3.43172	0.0522428
5930412G12Rik	3.24529	0.0522917
Atic	-2.14689	0.0523121
Gata3	-3.32283	0.0527137
Zc3hav1	-3.02493	0.0533292
Fam69b	3.29764	0.0538224
Aldh7a1	-3.29375	0.053858
Hoxb7	2.48626	0.053858
Tmem189	-3.1745	0.0540868
Rpl38	3.31341	0.0544788
Chchd4	3.43238	0.0550239
Mrps25	3.35051	0.05505
Dhrs7	-3.15814	0.0550939
Jak1	-3.3424	0.0550939
Rasl11a	2.92249	0.0550939
Ei24	-2.25089	0.0554668
Snap23	-3.08296	0.0564751
Sumf2	3.39794	0.0566304
Cct5	-3.29066	0.0567092
Postn	-3.11249	0.0567573
Faf2	-0.973734	0.0567719
Lmo4	-3.04551	0.0574989
Fam110a	3.41559	0.0578216
Commd2	3.39597	0.0580083
Arhgef1	-1.98129	0.0581728
Ik	-2.76677	0.0581728
Mrpl27	3.40147	0.0581728
Myl6	-3.21124	0.0584507
Hsd17b12	-3.36607	0.0585073
Frg1	-3.28915	0.0586872
Msh6	-0.440068	0.0588627
Gadd45g	-3.11715	0.0589234
Aars	3.29745	0.0593069
Ptch2	-2.92834	0.0593929
Klc3	-3.26018	0.0594508
Rpl21	-3.37976	0.0604735
Pdlim5	-3.26956	0.0608726
1700123O20Rik	3.36561	0.0612869
Rtn4	-3.36553	0.0616703
Dnajc17	-3.26501	0.0618648
Mnd1	-2.27559	0.062193
Chrd	NA	0.0622667
Efna4	3.06836	0.0622667
Eme2	NA	0.0622667
Iqck	NA	0.0622667
Srp68	-3.3051	0.0625853
Gsk3a	-3.30262	0.0626094
Csde1	-2.97724	0.0626434
Xrcc1	-3.31552	0.063032
Shprh	-0.262581	0.0633474
Antxr1	-3.21963	0.0634386
Eif2b3	-3.15103	0.0637833
Serpinb5	-3.233	0.0638387
Tsc22d1	-3.28703	0.0638387
Ntmt1	3.37091	0.0642878
Rhpn2	-1.93688	0.0642878
Sf3a1	-2.95347	0.0642878
Srsf11	-3.22298	0.0642878
Bri3bp	3.36916	0.0645243
Wnt4	-3.16339	0.0648861
Prkab1	-3.11171	0.0649828
Cnpy4	-2.63491	0.0653158
Cmtm3	3.04686	0.0655104
Dnajc7	-3.32073	0.0655104
Dmkn	-3.33717	0.0655846
Hmgn1	-3.13168	0.0658175
Mcc	-2.80341	0.0673221
Qpct	-0.674262	0.0678796
Sgta	-3.30481	0.0678796
Arpc2	-3.32604	0.0681684
Vasp	-3.27893	0.0688182
Dcaf7	-3.1168	0.0689356
Etfb	-2.97281	0.0691048
Ahr	-0.060308	0.0693105
Lrrc59	-3.28464	0.0693105
Nosip	-3.18517	0.0693105
Rbm18	-2.78582	0.0694897
Fam134b	3.08271	0.0695527
Fbxo46	3.26524	0.0699716
Xrcc2	3.26524	0.0699716
Lgals7	-2.82432	0.0702405
Arfip2	-2.85388	0.0704141
Mafb	-3.27379	0.0707354
Thop1	-3.04377	0.07075
Commd5	3.27555	0.0711997
Rmi1	3.31921	0.0711997
Sil1	2.19232	0.0711997
Calm3	-3.25016	0.072152
Prkd2	-3.15273	0.072152
Crls1	-2.75202	0.0722698
Mcrs1	-3.22788	0.0722698
Ncbp1	-3.21235	0.0722698
Rcc2	-3.13662	0.0722698
Sema6a	3.23303	0.0722698
Zdhhc1	1.95688	0.0722698
Cdca8	-2.72847	0.0731454
Pex6	-3.20575	0.0731454
Cdca4	3.26127	0.0737739
Lysmd2	3.31362	0.0738273
Degs1	3.25456	0.0747459
Stat6	-3.12606	0.0750175
Erlec1	-3.04024	0.0752526
Bri3	-1.93693	0.075303
Vimp	-3.14957	0.075303
Wdr53	2.87302	0.075303
Dnajc18	3.26465	0.0761875
Mpdu1	-3.10915	0.0772069
Rbm42	-3.14526	0.0772069
Gpsm2	-3.1713	0.0773421
Eri3	-3.1784	0.0777134
Manf	3.147	0.0777134
Serinc5	-3.12268	0.0779518
Mad1l1	-3.14582	0.0781623
Slc39a8	-2.23058	0.0784397
Smim20	-3.23221	0.0787065
Zmat2	3.18834	0.0788189
Tmem176b	-3.20321	0.0790048
Rora	-2.95704	0.079263
Nipsnap1	2.8358	0.0797944
Ino80c	-3.0857	0.0799376
Med9	3.27506	0.080136
Eps15	-2.77515	0.0801712
Slc35e4	-3.01874	0.0801712
Snrpg	3.00131	0.0801712
Stk25	-3.09911	0.0801712
Cenpf	0.703679	0.0805
Gas6	-2.87806	0.0805
Uqcrc2	-2.30486	0.0817662
Atp6v0b	-3.04859	0.0822035
Cat	-3.1829	0.082217
Car12	-3.19568	0.0834687
Ccdc89	NA	0.0834687
Cdc42	-3.16336	0.0834687
Csnk2a1	-2.80103	0.0834687
Fntb	-3.14211	0.0834687
Gm53	NA	0.0834687
Scaf4	0.299676	0.0834687
Snx20	NA	0.0834687
Atf3	-2.98917	0.0838332
Ttc3	-3.20168	0.0840969
Ubl7	-3.16774	0.0840969
Nrbp1	-3.18367	0.0845492
Kat6a	2.56397	0.0847299
Sf3b2	-3.10226	0.0848005
Eif5	-2.80217	0.0850553
Nup93	-3.14138	0.0850553
AI837181	3.19168	0.0850865
Spcs3	-3.07276	0.0850865
Nup37	-3.15643	0.085477
Krtcap3	2.92581	0.0856495
Psmd11	-1.23139	0.0856495
U2af1	-2.55365	0.0856495
Trappc3	3.20656	0.0858106
Tubgcp2	-3.15072	0.0858106
Atf7	-2.68342	0.085968
Kank1	-3.04645	0.0864998
Tgif1	3.18122	0.0864998
Fam122a	3.11599	0.0876332
Trafd1	-3.11706	0.0877023
Ppp2r1a	-2.89916	0.0879888
Acp1	-2.82376	0.0883088
Capzb	-3.18338	0.0883088
Gnb1	-3.20055	0.0883088
Naa16	-3.05849	0.0883088
Mrps21	2.46777	0.0883763
Clta	-2.75795	0.0888553
Exosc1	2.15574	0.0888553
Atp6v1d	-3.18798	0.0889629
Baiap2	-2.86003	0.0893988
Tbc1d9b	-3.03756	0.0896996
Mios	3.17457	0.0901119
Vangl1	3.19084	0.0901119
Dbr1	2.96197	0.0905728
Gm561	2.84403	0.0905728
Nenf	3.20387	0.0905728
Srp54b	-3.18056	0.0905728
Cotl1	-3.15716	0.0909996
Timm21	3.14495	0.0914516
Pacsin2	-3.10771	0.0919559
Sub1	-3.11286	0.0932135
Lypd6b	-3.10548	0.0937638
Bace1	-2.08781	0.0942405
Baz1a	-3.09169	0.0945711
Klk10	-3.00162	0.09459
Smg9	-2.92701	0.0949569
0610012G03Rik	3.1861	0.095538
Sbds	-1.57499	0.0965725
Ensa	-3.12466	0.0966207
Cdca5	2.98164	0.0967656
Krt10	-2.7406	0.0968295
Fam173a	2.59763	0.0968662
Pon2	-0.217888	0.0969741
Coro1b	-2.44507	0.0974429
Cyp2j6	-2.44478	0.0974429
Dap3	-2.68481	0.0974429
Pdlim7	-3.00575	0.0974429
Serpinb6a	-2.4133	0.097496
Smarca4	-2.90044	0.097496
Ntm	-2.72344	0.0977176
Ppard	-3.05396	0.0977176
Rps14	-3.16906	0.0977176
Alyref	-2.83622	0.0977319
Fam216a	-3.1154	0.0977319
Ilk	-2.94872	0.0977319
Vdac3	-3.02183	0.0978936
Psma1	-2.44654	0.098029
Rabif	2.80828	0.0982708
Rassf1	-2.25763	0.098288
Sephs1	1.53933	0.0996723
Foxk2	-2.97382	0.0996909
Cnbp	-3.05419	0.0998185
Stap2	-2.81805	0.0998185
Polr3c	-2.36181	0.0998969
Pcnxl3	-2.8569	0.0999415
Zfhx3	2.92237	0.0999415
Apip	-3.00959	0.100263
Bbs9	-2.81797	0.100818
Ramp1	-2.81797	0.100818
Med11	3.16823	0.101395
Tssc4	3.1332	0.101535
Ssr3	-3.07454	0.102641
2210016F16Rik	2.91295	0.102654
Plec	-2.46159	0.102807
Nfs1	1.66118	0.103022
Coa6	3.12626	0.103379
Stxbp4	-2.94211	0.103379
Ap3b1	-3.06828	0.103727
Rps17	-3.14113	0.103727
S100a9	1.86003	0.103727
Bzw1	-3.02493	0.104228
Dhrs3	3.06272	0.104228
Dad1	-3.126	0.104883
Atp6v1b2	-2.49674	0.104998
Ndrg3	-3.06107	0.104998
Grpel1	3.14107	0.10525
Taf10	-2.90257	0.10525
Cep135	3.03516	0.106236
Nnat	-2.81063	0.106236
Slc12a9	3.03516	0.106236
Fbxw11	-2.74837	0.106829
Dsp	-3.03333	0.107478
Hist1h2ap	3.12167	0.107478
Ttc30b	2.27381	0.107478
Ppp1r12a	-2.76573	0.107758
Thy1	-2.8438	0.107758
Gstm1	-2.67829	0.108007
Elovl7	1.22029	0.108539
1300002E11Rik	-2.89258	0.108569
Fbxo18	-2.29083	0.108725
1810055G02Rik	1.76806	0.108831
Cd81	-3.01252	0.109075
Gstk1	-2.9031	0.109093
Ndufa11	-3.1048	0.109321
Sirt7	-2.19471	0.109321
Lcmt2	2.88056	0.109666
Eif3i	-2.61744	0.109779
Pip5k1a	-2.81995	0.110093
Rfc5	-1.71546	0.11011
Ccdc109b	-1.473	0.110252
Wdr25	-1.473	0.110252
Nadk2	-2.67144	0.11078
Ankrd54	-2.83948	0.110856
AA543186	NA	0.111906
Aen	3.11137	0.111906
Efr3b	NA	0.111906
Flywch2	-3.04366	0.111906
Hist1h2bb	NA	0.111906
Lsamp	NA	0.111906
Paqr6	NA	0.111906
Psmb9	NA	0.111906
Ryr1	NA	0.111906
Tekt2	NA	0.111906
Tlx3	NA	0.111906
Wfs1	NA	0.111906
Rnmtl1	3.11684	0.112749
N4bp2	-2.95693	0.113008
Hmg20b	-3.02166	0.114113
Hscb	-3.04752	0.114429
Ubqln1	-2.95861	0.115035
Ctsd	2.86086	0.115074
Sf3b6	-3.04622	0.115074
Usp39	-3.03671	0.116193
Acer2	3.09007	0.116672
D17H6S53E	2.20712	0.116672
Dnajb6	2.93102	0.116672
Csnk2b	-2.27695	0.116703
Etfa	-2.92943	0.117861
Adamtsl1	-2.9671	0.11848
Unc45a	-2.62934	0.119149
Hspa1a	3.03776	0.119346
Blvrb	-2.5594	0.119695
Pithd1	-3.00615	0.11976
Rab11a	-3.03492	0.120278
Plgrkt	-2.95151	0.120477
Nelfa	-3.02727	0.120502
Ppil4	0.794949	0.122047
9430016H08Rik	2.95893	0.122122
Espl1	-2.32554	0.122122
Dctn1	-2.99465	0.122152
Eif2s1	-2.23648	0.122152
Aplp2	-2.09032	0.122633
Aimp1	-3.01954	0.122647
Slc30a9	-2.48604	0.122647
Spry1	-0.80293	0.123219
Cdk17	-2.92557	0.124528
Scamp2	-1.77095	0.124528
Fdft1	3.03071	0.125297
Hook2	-0.151505	0.125635
Psmd1	-2.99692	0.125688
Mapk13	-3.01086	0.125959
Gm8773	2.82796	0.126033
Exoc7	0.931482	0.126909
Cdkn1c	-3.00524	0.127296
Bend5	-2.95936	0.127705
Cox6c	3.04372	0.127815
Tnfaip8l1	2.54654	0.127815
Fahd1	0.764149	0.128129
Serpinb7	-1.99862	0.129891
Sh3glb2	-1.63496	0.129891
Yy1	-2.9969	0.129891
Ctnnb1	-2.78737	0.13104
Trappc6a	-2.55362	0.13104
Prpf38a	-2.88188	0.131257
Nop14	-2.96683	0.131391
Mrpl48	-2.77286	0.131644
Endou	-2.94048	0.132902
Ankrd42	NA	0.132915
Ccdc63	NA	0.132915
Gpr27	NA	0.132915
Pglyrp1	NA	0.132915
Sh3glb1	-2.33043	0.132915
Arid4b	-2.91183	0.133033
Chchd3	-2.67283	0.133563
Rbm8a	-1.91869	0.133781
Cygb	-2.84206	0.133907
Fn1	-2.95073	0.135135
Hdac5	-2.95844	0.135483
1500011B03Rik	1.97972	0.135512
Pus1	2.98079	0.135512
Mvb12a	-2.96648	0.135561
Ppm1a	-2.33526	0.135561
B230118H07Rik	-2.75363	0.135686
Sfswap	-2.81163	0.136343
Rfc4	-2.98116	0.136422
Akirin1	-2.86574	0.136661
Umps	2.98184	0.136661
Pcdh9	-2.31785	0.136729
Steap4	-2.31785	0.136729
Spo11	-2.84203	0.136875
Tacc1	-2.84701	0.136875
Trp53i11	-2.54264	0.136875
Samm50	-2.8512	0.137851
Zfp646	2.93812	0.138491
Hspa4l	-2.73067	0.138531
Barx2	-1.10691	0.13904
Psen1	-2.71451	0.13904
Qars	-2.72779	0.13904
Sypl	-2.45986	0.13904
Sde2	2.94791	0.139302
Hoxc5	0.719531	0.13956
Bola1	2.94297	0.140151
Farsb	-2.91776	0.140151
Anxa8	-2.89058	0.140539
Map2k2	-2.91019	0.141204
Tfap2b	-2.8313	0.141204
Scd2	0.602791	0.141298
Skp1a	-1.35622	0.141347
Mettl21a	2.98536	0.141712
Rhbdf1	2.90821	0.141712
Zbtb12	2.77297	0.141712
Cog7	-2.54086	0.141984
Igf2bp1	-0.987156	0.142406
Pofut2	-0.0185713	0.143028
Tram1	-2.76418	0.143391
Usp22	-2.25056	0.14344
Actr3	-2.71948	0.143476
Zfp385a	-2.94915	0.143476
Cep44	-2.92704	0.143648
Ift52	-2.86515	0.14383
Mical3	-0.387141	0.14383
Ubap2l	-2.6864	0.14383
Poldip2	-1.10904	0.143889
Rab20	2.80769	0.143889
Nol10	-2.82257	0.144035
Cacfd1	-2.94537	0.14437
Fkbp8	-2.96687	0.145243
Kcmf1	-2.85714	0.145243
Plscr3	-2.87285	0.145243
Usp34	-2.5236	0.145454
Hmgn3	2.21599	0.145523
Sfxn3	-2.89145	0.146665
Acyp1	-2.02653	0.147239
1700026L06Rik	-2.49449	0.147768
Slc5a9	-2.49449	0.147768
Wtip	1.28405	0.148612
Mettl7a1	2.95799	0.149059
Gcat	-2.84111	0.149115
Mfap2	-1.97347	0.149226
Nav2	-2.50938	0.149226
Sdcbp	-2.4873	0.149226
Hnrnpm	-2.95466	0.149301
Aldh3b2	-2.74769	0.149428
Cbr3	2.50804	0.1495
Crem	-2.50878	0.1495
Utrn	-2.87558	0.1495
Cyb5r3	-2.93908	0.149602
Stoml2	-2.76792	0.150143
Dhx36	-2.51531	0.15043
Mff	-2.94393	0.150611
Lrba	-2.68596	0.15129
Mrpl23	-2.86237	0.15129
Rangrf	-2.88661	0.151838
Upp2	-2.64809	0.151846
Mthfd2	2.87271	0.152041
Irx2	-2.90973	0.152485
Mtif3	2.92796	0.152485
E2f1	-2.85201	0.152642
Pdxdc1	-2.53446	0.153399
2310022A10Rik	2.70838	0.153842
Pak1ip1	-2.91772	0.153842
Tmsb10	2.80769	0.154058
Gpaa1	-2.878	0.154145
Caprin1	-2.9233	0.15489
Pxn	-2.37427	0.155472
Gstp1	2.84605	0.155543
Zfp113	-1.681	0.155543
Strada	-2.11717	0.156044
Ddx24	2.71019	0.156142
Nnt	-2.87551	0.156183
2300009A05Rik	2.65751	0.156671
Stxbp2	-2.81862	0.156872
Stub1	2.79554	0.157314
Tomm20	-2.91255	0.15781
Ctdnep1	-1.6049	0.157849
Gsg2	2.40323	0.158381
Ppp4c	-2.40208	0.158621
Higd1a	-2.50413	0.159315
Picalm	-2.58581	0.159533
Comt	2.80508	0.159687
Emp3	-1.37656	0.159931
Pcyox1	-2.80468	0.16058
Map2k7	-2.62295	0.161123
Gyltl1b	-2.87751	0.161131
Pcyt2	2.537	0.161208
Mlf2	-2.72797	0.161349
Atg16l1	2.86103	0.163133
Ltb	2.6097	0.16378
Pigx	-2.89258	0.164086
Haus1	-2.37846	0.164396
Serpinb1b	-2.67341	0.16456
Sacm1l	-2.77949	0.164574
Msantd4	2.89173	0.164706
N4bp3	-2.84669	0.164706
Zfp706	-2.83607	0.164706
Pigp	-2.8281	0.164966
Trmt12	2.20794	0.164966
Zmynd8	-2.84836	0.164966
Ndufaf7	2.62683	0.165395
Tpm1	-2.86924	0.165842
Ncor1	-2.88773	0.166256
Ano9	-2.80117	0.166877
Pcmt1	-2.7784	0.167322
Pcif1	2.91076	0.167708
Trmt1	-2.87551	0.167708
Tulp3	-2.83203	0.167708
Aimp2	-0.112351	0.168095
Pgam1	-2.88194	0.168095
Sepw1	-2.12081	0.168272
Ddx39b	-2.81997	0.168573
Fam21	-2.19298	0.168573
Impa1	-2.63144	0.168573
Rnf146	2.53121	0.168656
Nup62	2.89936	0.168876
Ccdc115	-2.86122	0.169033
Mif	-2.63928	0.169033
Tagln3	-2.33745	0.169033
Coq3	2.82008	0.169037
Kif21a	-2.69637	0.169037
Zdhhc17	2.43298	0.169318
Bloc1s4	2.13803	0.169532
Pfdn1	-2.08227	0.169532
Pigv	-2.70885	0.169532
Msmo1	2.36983	0.170412
Ptk7	-2.76761	0.170412
Top1	-2.69692	0.170412
Hnrnpab	-2.83005	0.171335
Tsfm	2.78363	0.171697
Csta1	-2.7688	0.171726
Lfng	-2.82661	0.172958
Fkbp9	-2.38762	0.173158
Rpl5	-2.88651	0.173699
Tubb4b	2.86776	0.173699
Atox1	-2.8356	0.17428
Clpp	0.587363	0.17428
Itpr2	-2.65478	0.17428
Cfl1	-2.87518	0.17544
2610035D17Rik	-2.77754	0.176437
Ddx20	2.85262	0.176873
Drap1	-2.85982	0.176873
Ppp4r2	1.62019	0.176873
Twistnb	2.60219	0.176873
Chic2	-2.76081	0.177496
Cdk9	2.70368	0.178054
Yif1a	-2.82435	0.178207
Snapc5	2.49624	0.17829
Dnajb4	2.45589	0.178394
Osgep	-2.79714	0.178593
Polr2a	-2.09397	0.178593
Ankrd11	-1.98055	0.178868
Krt1	-2.83152	0.179125
Mpped2	2.87998	0.180531
Mycn	2.83841	0.181045
Cenpt	-2.75996	0.181779
Ankrd49	2.30257	0.182241
Mybl2	2.59394	0.182501
Anks3	-2.63276	0.182861
Slc39a7	-0.204759	0.182861
Senp8	0.774203	0.182978
Efnb2	-2.39985	0.183299
Casz1	-1.14286	0.183753
Phlda1	-0.814131	0.183851
H19	-2.51871	0.184122
Ndufs3	-2.80663	0.184228
Smim14	-2.59587	0.184228
Adipor1	-2.65294	0.184889
Nme7	-0.763041	0.184889
Pccb	-1.69807	0.185191
Vps53	-2.79079	0.185401
Ttc30a1	2.8405	0.18544
Fbxo30	2.80973	0.186543
Asf1b	2.71465	0.187244
Ywhaz	-2.60525	0.187268
Pop1	1.10956	0.189206
Tha1	-0.355551	0.189206
Ak6	1.35164	0.189279
Rps10	-2.84158	0.189904
Ndufa7	-2.825	0.192847
Rpl7a	2.75289	0.192885
Caml	0.385356	0.193495
Rab40c	-2.47328	0.193823
Hgs	-2.56253	0.196215
Ap1g1	-2.75089	0.196945
Ptgr1	-2.60507	0.196945
Wdr86	2.83678	0.196945
Arfgap1	-2.67956	0.197144
Arhgap25	-1.5929	0.197144
Msx2	1.99945	0.197144
Ube2e2	-2.67529	0.199721
Nfyb	2.77464	0.200036
Echdc1	-1.29327	0.200329
Nol12	2.82431	0.200594
Lmf1	-2.66292	0.201221
Alg5	-2.20352	0.201313
Abcb9	NA	0.201357
Arrdc1	-2.2717	0.201357
BC003965	2.80364	0.201357
Chst15	-2.60683	0.201357
Dalrd3	-2.09506	0.201357
Derl3	NA	0.201357
Dnajc2	-2.49795	0.201357
Dusp14	2.79288	0.201357
Emc2	-2.73138	0.201357
Etv1	NA	0.201357
Gfi1	NA	0.201357
Ggt7	NA	0.201357
Gsta1	NA	0.201357
Hist1h1d	-2.64247	0.201357
Limd2	-2.76916	0.201357
Lmx1a	-2.56211	0.201357
Nudt12	NA	0.201357
P2ry1	NA	0.201357
Paqr5	NA	0.201357
Pcdh20	NA	0.201357
Pcdhb21	NA	0.201357
Prmt1	-2.50162	0.201357
Rasip1	-2.56211	0.201357
Rps20	-2.81221	0.201357
Rpusd1	2.22872	0.201357
Tarsl2	NA	0.201357
Tepp	NA	0.201357
Tmem30c	NA	0.201357
Tppp	NA	0.201357
Txnl1	-2.32864	0.20364
Rnd3	1.77944	0.203897
2700062C07Rik	2.55165	0.204034
Tsg101	-2.77664	0.204034
Rnf219	2.70481	0.204607
Cmc2	2.76357	0.206052
Carkd	-1.95136	0.206354
Poglut1	-2.43001	0.206743
Pkp1	-2.72735	0.206886
Pts	-2.66637	0.207081
2810474O19Rik	2.61696	0.207118
Adrbk2	NA	0.207118
Arsi	NA	0.207118
Drd4	NA	0.207118
H2-DMa	NA	0.207118
Icam1	-2.63582	0.207118
Kbtbd8	NA	0.207118
Klhl11	NA	0.207118
Map2k6	-2.56542	0.207118
Phf5a	2.70507	0.207118
Sgsh	NA	0.207118
Tbl1xr1	-0.804297	0.207118
Tnfrsf23	NA	0.207118
Unc13d	NA	0.207118
Fth1	-2.78812	0.207613
Fscn1	-2.698	0.207701
Herc1	-2.28984	0.207701
Lipt2	2.76034	0.207701
Raph1	1.57818	0.207701
Ifnar2	2.7571	0.207907
Brd3	-2.56906	0.210077
Sh3bp1	-2.4736	0.210322
Ppp6r3	-2.46271	0.211008
Hes6	1.74591	0.211187
Bag1	-2.74565	0.211245
Cuedc2	-2.74829	0.211245
Ufd1l	-2.73926	0.211245
Kif5b	-2.35633	0.211683
Ttc19	-2.25314	0.211683
Zfp266	-0.511139	0.211683
Hmbs	-2.26653	0.212097
Mt2	-2.74257	0.212101
Exoc2	-2.58861	0.212467
Ubxn6	-2.73564	0.212467
Vps35	-2.69296	0.213185
Zdhhc21	2.2206	0.213306
Gnptg	-2.24321	0.213712
Stat3	-2.67434	0.213712
Tnfaip8	2.64867	0.214281
Eef2k	-2.67715	0.214621
Rbpj	2.77809	0.215794
Dnm2	-2.71497	0.215978
Fbxo5	2.77859	0.216433
Ubr3	-2.65288	0.216564
2700049A03Rik	-2.28676	0.216813
Neil3	-0.454591	0.216844
Ccnd2	-2.26175	0.216966
Prodh	2.6657	0.218354
Zfp777	2.76184	0.218354
Ctdspl	-2.71377	0.218743
Snx15	-2.71377	0.218743
Casp6	-2.73639	0.218747
Pgm3	-2.66721	0.218747
Tmem246	2.59526	0.219181
Cep55	2.52225	0.220995
Cuta	-2.68119	0.222209
Ucn2	-2.25353	0.222217
Clasrp	-2.66758	0.222845
Irak1bp1	2.7133	0.222845
B3gntl1	-2.47071	0.222916
Pkn1	-2.47071	0.222916
Fam221a	-2.62124	0.222944
Fryl	-2.31151	0.222944
Gstm4	2.7067	0.222944
Vps33a	2.7596	0.222944
Elof1	1.99403	0.223032
Asprv1	-1.31329	0.223244
Zfp593	2.74858	0.223244
Atp13a2	-2.69991	0.223247
Ndufa5	-2.55451	0.223247
Ybx3	-2.73367	0.223247
Actr1b	-2.64114	0.223359
Zc3h13	2.19544	0.22343
Atp1a1	-2.52814	0.223568
2610528J11Rik	2.72842	0.223767
Adipor2	-2.54186	0.224088
Ghdc	-2.55818	0.224283
Surf1	-2.4594	0.226474
Fubp3	-2.52999	0.226784
Glo1	-2.34485	0.226784
Sec13	-2.24368	0.227442
Srrt	-1.50501	0.228222
2810403A07Rik	-2.14321	0.228377
Chek1	2.7334	0.228377
Tle1	-2.11465	0.228377
Stx4a	-2.6994	0.228653
Abi1	-2.20799	0.228722
Slc38a4	-2.57744	0.228722
Gnal	-2.29589	0.230062
Smarcb1	-2.44729	0.230281
Lurap1l	-2.70301	0.230763
Dhrs4	2.73494	0.231014
Tril	-1.44999	0.231014
Ldhb	-2.63339	0.231703
Hnrnpl	-2.70552	0.231893
Dlst	-2.5152	0.232155
Ndufs8	-2.5596	0.232495
Nod2	0.067729	0.232495
Serpinb10	-2.31503	0.232497
Lrrc40	-2.48307	0.23258
Mtpap	2.73008	0.23258
Ssu72	2.57098	0.233168
Toe1	2.33639	0.233168
Prr5	2.69271	0.233179
Zfp563	2.59994	0.233656
Scap	0.161578	0.233775
Tnfrsf19	1.21486	0.233775
Fis1	-2.62895	0.233775
Gga1	-2.12435	0.233976
Akr1b8	-2.55666	0.234341
Chchd7	-2.68712	0.234342
Cirh1a	-2.67889	0.234342
Impad1	1.92136	0.234342
Rnf19b	1.86012	0.234342
Snx2	-2.29457	0.234622
Tmed9	-1.58423	0.234976
Prim2	-2.65471	0.235908
Smarca5	-2.69528	0.235908
Zfp703	-2.1523	0.23613
1700048O20Rik	-2.38203	0.236318
Ganab	-2.6338	0.236751
Dyrk3	2.71186	0.236817
Pigs	-2.56053	0.237608
Shkbp1	-2.10927	0.237608
Anp32b	2.69562	0.237636
Eapp	-1.03322	0.237636
Ppp1r13b	-2.06479	0.238282
Stx6	-2.55345	0.239073
Tmem138	1.73212	0.240217
Arfgap2	-2.68338	0.240591
Abhd12b	-2.36068	0.241049
Fan1	0.345035	0.241049
Robo2	-0.63459	0.241945
Serinc2	-1.99462	0.241945
Slc25a11	0.0246308	0.241945
Psmg4	-0.941896	0.24231
Rhobtb3	-2.63908	0.24231
Tssc1	2.64974	0.24231
Dcaf11	-1.40824	0.242413
Pafah1b1	-2.68239	0.242413
Zmynd11	-2.66564	0.242615
Ntpcr	-2.60846	0.242701
Col27a1	-2.60007	0.243293
Ube2o	1.90222	0.243293
Mettl16	1.43318	0.243613
Nudt6	-1.10332	0.243613
Bag5	2.6683	0.243914
Arhgef39	0.0452583	0.24426
Arpc5	-2.08403	0.244796
Psmd9	-2.67507	0.244796
Srp14	-2.68407	0.245296
Osbp	-2.35922	0.246298
Vmp1	-2.4625	0.246298
Ankrd17	-2.51361	0.246332
Rpp30	-2.51506	0.246779
Tecpr1	-2.54828	0.246779
Ndufs2	-2.66764	0.247096
Phldb3	-2.63389	0.247096
Gjc1	2.58274	0.247933
Pnpla6	-2.539	0.247965
Copz1	-2.16739	0.248103
Hmces	-2.59678	0.248103
Plxnb2	-2.24471	0.248103
Ppp2r5c	-2.10494	0.248575
Nub1	-2.27111	0.248972
Spire1	2.59009	0.248972
Tmem101	-2.57736	0.249697
Ier5l	2.5517	0.249868
Map4k4	-2.63469	0.249868
Phpt1	-1.56844	0.249868
Efr3a	-2.62614	0.250403
Mb21d2	0.850688	0.250686
Atg10	-1.30515	0.251468
Fst	-2.09452	0.251468
Rest	0.204509	0.251468
Afg3l1	-2.40626	0.251545
Prkaca	-2.03168	0.251984
Pum2	-2.63055	0.251984
5730507C01Rik	2.47548	0.252233
P4ha1	-2.62136	0.252233
Tnrc6c	2.67056	0.252233
Mnat1	-2.46876	0.252868
Brap	-1.70541	0.253611
Zfp330	-1.79771	0.253611
Ruvbl2	-2.574	0.254009
Rab6a	-2.0585	0.255119
Ubald2	0.689597	0.255119
Cd3eap	1.93581	0.255359
Ctgf	-2.49627	0.255661
Timm22	-2.22008	0.255661
Spint1	2.60082	0.255983
Terf2ip	2.67217	0.256819
Tln1	-2.20225	0.256819
Vapa	-2.58891	0.256819
Srp72	-2.6506	0.257446
Trp73	-1.47654	0.257446
Supt5	-2.4537	0.257942
Jagn1	2.56332	0.25796
Hadh	-2.5984	0.257986
Tada3	0.468052	0.257986
Uqcrb	-2.47278	0.258112
Glul	2.62171	0.25851
Slc25a17	-2.24065	0.258871
Sema4c	-1.97029	0.26008
Med20	-2.61107	0.261132
Zfp760	2.63611	0.262799
Fars2	2.66318	0.26329
B9d2	2.53494	0.264272
Tvp23b	-2.58793	0.264272
Fut1	2.56883	0.264449
Rheb	-2.63817	0.265106
Gatad2a	-1.76952	0.265764
Mrps2	2.65202	0.266638
Recql	2.6198	0.266929
H2-T23	-2.55899	0.267207
B630005N14Rik	2.4675	0.26727
Pmm1	2.53513	0.267827
Tmem183a	-2.17191	0.268275
Ciapin1	-2.58531	0.268303
Dab2ip	-2.51854	0.269161
Rngtt	-1.37662	0.269161
Galnt6	-2.33977	0.269345
Immp2l	-2.55257	0.269589
Mxd1	-2.44769	0.270111
Znhit3	0.763682	0.270412
Prpf6	-1.93634	0.272459
Slc31a1	-2.49277	0.272459
Rabep1	2.55573	0.272566
Bsg	-2.46007	0.272624
Tcf7	-2.4026	0.272757
Kmt2e	-2.58784	0.274055
Rabl3	0.19041	0.274055
Fgfr1	1.42473	0.274439
Narf	-2.35428	0.274772
Ubr5	-1.84126	0.275948
Bola3	2.48915	0.276065
Cd44	-2.55617	0.276065
Hs6st1	-2.32811	0.276065
Sike1	-2.57897	0.276536
Fzd2	-2.43452	0.278001
2010107E04Rik	1.41647	0.278212
Amotl2	2.4644	0.278212
Rcor3	-2.36407	0.278212
Slc25a4	1.18643	0.279066
Plekhg1	0.489043	0.27935
Efna1	-2.58177	0.280624
Tpi1	-1.29014	0.28087
Myeov2	2.57709	0.280995
Med22	-2.14755	0.281672
Cmtr2	2.55675	0.282672
Hps3	2.55675	0.282672
Serp1	-2.44301	0.282672
Lyrm4	2.62029	0.282916
Phc1	1.8312	0.282916
Reep4	-1.8018	0.282952
Ddrgk1	-2.20783	0.283084
Herc4	-2.53472	0.283084
Gnpda2	-2.06211	0.284096
Uba2	-2.26757	0.284101
Ufsp1	2.58604	0.284101
Ndufb8	-2.55446	0.284179
Zfp954	2.49578	0.284289
Odf2l	-2.20145	0.284741
Mbd5	-1.84591	0.284743
Grwd1	2.38351	0.285269
Ncoa5	-0.680674	0.285269
Ndufa9	-2.58957	0.285752
Aco2	-2.44045	0.285788
Hnrnpr	2.48029	0.285788
Psme4	-2.31469	0.285788
Kcnmb4	-1.8606	0.286556
Zdbf2	2.5773	0.286556
Atpaf1	-2.14447	0.286616
Dpf2	-2.44575	0.286616
Fopnl	-2.43537	0.286616
Bbip1	-0.689225	0.286893
Galt	-2.29591	0.286893
Hes1	2.29601	0.286893
Hspbp1	-0.844732	0.286893
Pnn	-2.07719	0.286893
Tmem33	-2.39917	0.286893
Trappc1	1.33013	0.286893
Zswim1	2.59792	0.286893
Fkbp2	-1.32544	0.287328
Ap1s1	-2.57816	0.288282
Atp5h	-2.36403	0.288353
Usp3	-2.56789	0.288353
Wbscr27	-0.865783	0.288353
Cltb	-2.51803	0.288497
Fam172a	-2.05904	0.288497
Psma5	-2.40367	0.288497
Rock1	-2.52353	0.288497
Sap30	-2.57031	0.288497
Slc25a20	-2.20772	0.288497
Vps26b	-2.29809	0.288497
Copb2	-2.53732	0.288772
Amacr	2.45131	0.288972
Ccdc58	-2.46449	0.288972
Gmppa	-2.43915	0.288972
Mgst2	-0.930746	0.288972
2310008N11Rik	-2.21786	0.289059
Nf2	-2.3081	0.289138
Sfxn1	2.28679	0.289333
Inha	-2.47364	0.2895
Tcf25	-2.49614	0.2895
Gatc	2.18637	0.289782
Dgka	-2.18515	0.289824
Mtfr1	-2.06347	0.289824
Numa1	-2.54162	0.29006
Thbs2	-2.38854	0.29006
2700038G22Rik	2.59393	0.290217
6330416G13Rik	-1.59631	0.290217
Gm826	-1.59631	0.290217
Nr4a1	-1.65914	0.290217
Nktr	-2.39412	0.290456
Hmgn2	2.52628	0.290465
Trmt61a	2.56561	0.290537
4833418N02Rik	-2.30664	0.290563
Cbll1	2.56357	0.290563
D430042O09Rik	0.714795	0.290563
Gtf2ird2	1.51245	0.290563
Zfp280b	1.51245	0.290563
Aebp2	-0.113154	0.290698
Kdm2a	-2.33289	0.290727
Ubap1	2.20636	0.290727
Cpsf3l	-1.7289	0.290727
Ccdc71l	-1.93105	0.290968
Pop5	2.48785	0.290968
Ptma	-2.58099	0.290968
Zbtb16	-1.36604	0.290968
Zfp451	2.59133	0.290968
Ly6e	2.43097	0.293458
Asb8	2.2791	0.293733
Fam102a	-2.48078	0.294094
Fgfbp3	2.3533	0.294248
Mpc1	-2.41565	0.294248
Tbc1d10a	1.576	0.294535
Pgp	2.55813	0.29479
App	2.5801	0.294808
Cdc25c	-2.46775	0.294808
Dnajc5	-2.13807	0.294808
Enah	-1.67877	0.294808
Fam124a	0.309539	0.294808
Hspbap1	2.51609	0.294808
Htra1	2.08068	0.294808
Junb	-2.0249	0.294808
Polr2f	2.40654	0.294808
Psmb7	-2.14181	0.294808
Rnf11	-1.95919	0.294808
Tjap1	2.46078	0.294808
Zc2hc1a	-2.26029	0.294808
Nap1l4	-2.50147	0.295104
S100a11	-1.83446	0.295244
Ifitm3	-2.21593	0.295293
Tanc1	-2.18916	0.295293
Ufm1	2.47867	0.295501
1810032O08Rik	2.12805	0.295833
Cdca3	-0.56199	0.295833
Eif1b	2.4867	0.295833
Met	2.42084	0.295833
Penk	-2.47533	0.295833
Ten1	-2.34391	0.295833
Srf	-2.4336	0.296142
Sephs2	2.31613	0.296192
Cgnl1	2.43816	0.296746
Lrr1	2.48894	0.297121
Pdgfc	-2.03846	0.297579
Rbm28	2.4931	0.298934
Arhgef5	2.46895	0.299667
Zfp707	2.53493	0.299794
Pex13	1.23555	0.300292
Mrpl30	-2.5274	0.301239
1700037C18Rik	2.50865	0.302427
Hibch	-2.39441	0.302427
Zfp948	2.50865	0.302427
Psmg2	-2.53343	0.30287
Rap1gds1	-2.12991	0.303275
Tmem64	2.4152	0.303522
Bpgm	1.51047	0.303593
Amd1	2.42898	0.304028
Hdhd3	2.54717	0.304484
Lzic	1.6703	0.305085
Ap2s1	-2.49719	0.306501
Tmem230	-2.5135	0.306804
Ttc28	-2.49252	0.30713
Fam81a	-1.82441	0.307218
Pfdn5	2.46091	0.307999
Phkg1	-0.279847	0.308284
Auts2	-2.16831	0.309355
Cetn3	-2.30406	0.310402
Ints2	-0.385103	0.310402
Neo1	1.27166	0.310402
Scfd1	-2.08232	0.310402
Acadsb	-2.20399	0.310492
Krtdap	-2.49985	0.311202
Cd74	-2.34094	0.311532
Ehhadh	2.42597	0.31171
Fbxl5	2.39525	0.31171
Six4	2.42597	0.31171
Tfap2a	2.06173	0.31171
Pdzd2	-2.48222	0.312233
Id1	-2.37511	0.312409
Tmem80	-0.186712	0.312463
Zranb2	2.40403	0.312463
Aim1l	-2.28473	0.312789
Mettl18	2.53106	0.312789
Mpp2	-2.28473	0.312789
Usp8	-1.90995	0.312789
1700092M07Rik	NA	0.313043
Atp5k	2.16296	0.313043
Bcar1	2.46336	0.313043
C1ra	NA	0.313043
Ccdc107	-0.848957	0.313043
Cdk5r1	NA	0.313043
Coro1c	-1.30014	0.313043
Dffa	-2.00982	0.313043
Dgkh	NA	0.313043
Diras2	-0.994525	0.313043
Dlg1	-2.34439	0.313043
Fam46b	NA	0.313043
Gstm3	NA	0.313043
Hgsnat	0.0230522	0.313043
Iscu	2.20449	0.313043
Jph1	NA	0.313043
Klrk1	NA	0.313043
Metap1d	-2.44987	0.313043
Mfsd11	-0.946222	0.313043
Ndrg2	-2.43486	0.313043
Ndufa2	2.40533	0.313043
Pacrg	NA	0.313043
Pcm1	-1.75484	0.313043
Rnf180	NA	0.313043
Slc25a26	-0.0924002	0.313043
Slc7a7	NA	0.313043
Tcp1	-2.51266	0.313043
Usp13	NA	0.313043
Zfp329	2.52116	0.313043
Nfkb1	-2.08888	0.313481
Lamtor1	-2.47986	0.313619
Tnf	-1.14419	0.313836
2510002D24Rik	-2.36642	0.314156
Fignl1	2.52525	0.314409
Mcm2	-2.44397	0.31551
Fam204a	-2.4305	0.315555
Rchy1	-2.23387	0.315555
Cdca2	2.24681	0.316349
Ears2	2.52392	0.316523
Col7a1	-2.49138	0.316642
Dpp9	-1.88854	0.316788
Acot1	2.36338	0.318501
Ccdc51	2.03353	0.318501
Lonp2	-2.35329	0.318501
Brf1	-2.19479	0.319598
Nemf	0.795076	0.320198
Dars	-2.41175	0.320293
Isoc1	-2.04422	0.320912
Slc2a8	-0.974378	0.320912
Spag5	-2.34368	0.32104
Mybbp1a	2.52214	0.322208
Rnf5	-2.48203	0.323255
Prdm11	-2.45449	0.323923
Rnpc3	-2.43922	0.324023
Ier5	2.38145	0.325423
Dmwd	-2.21588	0.325861
Slc2a1	-2.47174	0.325861
Ppie	-1.38283	0.325898
Ckmt1	1.18245	0.326446
Ndufb5	-2.39079	0.32655
Ykt6	-0.978921	0.327602
Ado	1.81738	0.329015
Gng11	-1.74777	0.329015
Whamm	-2.33259	0.329015
Tfap2c	-2.4555	0.329148
Cnih1	2.48408	0.329501
Kras	-0.86777	0.329501
Creb3l2	-2.3179	0.331243
Smdt1	-2.46385	0.331488
Kifap3	-0.784551	0.331488
Irx1	-2.36983	0.331627
Sec61a2	-2.17756	0.331627
Sgsm2	-2.37365	0.331627
Zc3h18	-0.594994	0.331627
Cwc27	-1.78817	0.33197
Vps16	-2.4281	0.33197
Gosr2	2.15259	0.332012
Atp9b	-1.40432	0.332635
Cxcr4	2.4786	0.333046
2010005H15Rik	NA	0.333708
2700060E02Rik	-2.47861	0.333708
3110045C21Rik	-2.31015	0.333708
4930451G09Rik	NA	0.333708
5430402O13Rik	NA	0.333708
Acbd7	NA	0.333708
Adamts6	NA	0.333708
Adh1	NA	0.333708
Ampd3	-2.34641	0.333708
Ank2	NA	0.333708
Antxr2	NA	0.333708
Ap1g2	-2.33525	0.333708
Ap3m2	NA	0.333708
Apoa1bp	-1.29273	0.333708
Arhgap20	NA	0.333708
Arl4a	1.44885	0.333708
Atp6v0a4	NA	0.333708
Cadm1	-2.46547	0.333708
Ccdc40	NA	0.333708
Ccdc62	-2.18374	0.333708
Cdh7	NA	0.333708
Cebpzos	-1.50299	0.333708
Cyp2u1	NA	0.333708
Ddah1	NA	0.333708
Dusp8	NA	0.333708
Ebi3	NA	0.333708
Ehbp1l1	NA	0.333708
Epgn	NA	0.333708
Erp27	NA	0.333708
Etnk1	-2.23719	0.333708
Fabp7	NA	0.333708
Fam105a	NA	0.333708
Fam118b	-1.40923	0.333708
Fam13c	NA	0.333708
Fermt3	NA	0.333708
Fgf11	-2.18374	0.333708
Fuom	0.764802	0.333708
Gatad1	-2.45788	0.333708
Gm11837	NA	0.333708
Gm13154	NA	0.333708
Gpc2	NA	0.333708
Hist2h3c2	NA	0.333708
Hivep3	NA	0.333708
Kctd7	NA	0.333708
Kif22	-2.38268	0.333708
Kirrel2	NA	0.333708
Kirrel3	NA	0.333708
Klhdc9	NA	0.333708
Lamc2	-1.07958	0.333708
Lat	NA	0.333708
Lix1l	NA	0.333708
Medag	NA	0.333708
Mfn2	1.70417	0.333708
Mfsd7b	-1.5799	0.333708
Minpp1	2.46543	0.333708
Mrpl13	-1.14455	0.333708
Mrpl9	-2.4402	0.333708
Mst1r	NA	0.333708
Pcdh17	NA	0.333708
Pgf	2.42422	0.333708
Phactr3	NA	0.333708
Pin1	-2.40211	0.333708
Ppp2cb	-1.99642	0.333708
Prex1	NA	0.333708
Ptprb	NA	0.333708
Rasl10a	-2.08323	0.333708
Rcor2	-2.41862	0.333708
Rgcc	NA	0.333708
Serpina9	NA	0.333708
Sgms2	NA	0.333708
Slco2a1	NA	0.333708
Sqstm1	-2.42025	0.333708
Srpr	-2.28021	0.333708
Tarm1	NA	0.333708
Tdh	NA	0.333708
Tgfbi	NA	0.333708
Tmem167b	-2.3732	0.333708
Tmem81	NA	0.333708
Wbscr25	NA	0.333708
Zcrb1	-2.41255	0.333708
Zfp551	NA	0.333708
Zkscan2	NA	0.333708
Tstd1	2.28488	0.333745
Man1b1	-1.56547	0.334173
Tubgcp5	-1.80514	0.334173
Zfp36l1	-2.32765	0.334173
Ppil2	-2.44483	0.334887
Chmp1a	-2.42748	0.336282
Abcf2	-1.16239	0.336605
Ptrh2	2.4418	0.336668
Wnt16	-1.845	0.337076
Sart1	-1.86206	0.337413
Mecr	-1.87149	0.338267
Tonsl	-2.37947	0.338788
Itpa	-2.06125	0.339187
Vdac2	-2.43937	0.339187
Zfp770	1.63802	0.339187
D2hgdh	-2.32035	0.339984
Mpc2	-2.42873	0.339984
Lsm6	1.04053	0.340364
Iars	-2.40195	0.341008
Gas1	-1.76622	0.341373
Rbm39	-2.38832	0.341373
Nop58	-2.44474	0.34161
Ubl3	-2.0454	0.34161
1500011K16Rik	2.45054	0.342287
Bad	-0.942608	0.342287
Emc8	2.27071	0.342287
Nipsnap3b	-1.29095	0.342287
Nqo1	-2.27899	0.342287
Rab38	1.94568	0.342287
Rpl19	-2.45294	0.342287
Wrnip1	-1.87107	0.343221
Cnot3	-2.38486	0.343807
Sec24a	-1.13757	0.344022
Ccdc53	-2.42191	0.344292
Sec22c	-2.17379	0.344292
E2f3	2.45767	0.344505
Ngly1	-2.30209	0.344505
Pxylp1	2.39725	0.344505
Trip6	-0.736865	0.344664
Prelid2	2.16048	0.34469
Rpsa	-2.44722	0.34469
Srpk1	2.43019	0.344731
Tes	-2.42152	0.344731
Fbxo34	-1.96448	0.344878
Pfkfb3	1.25581	0.344878
3110009E18Rik	-2.1982	0.344894
Scyl3	2.43948	0.344894
Ube2m	-2.42662	0.345287
Aldoa	-2.06416	0.346205
Axin2	-2.08407	0.346257
Rnf41	-2.22638	0.346943
Emc9	2.40502	0.347095
Ndufv1	-2.32091	0.347106
Creb5	-0.718569	0.347565
Prkcd	-1.40103	0.348095
Galk2	-2.27444	0.348693
Uxs1	2.00279	0.349067
Dcxr	-2.41612	0.349422
Zfp91	-2.18295	0.349422
Ociad2	-2.21544	0.349512
Strbp	-2.08135	0.349512
Emb	-1.48727	0.349528
Nup133	-1.18831	0.349919
Cul5	-2.26375	0.350122
Hirip3	2.28848	0.350433
Psmd14	-2.42096	0.352029
Arhgap24	-2.08807	0.352444
Chrac1	2.43859	0.352444
Myd88	-2.32741	0.352444
P4hb	-2.33862	0.352444
Pax3	-0.89685	0.352444
Birc2	-0.954315	0.354056
Slc16a3	2.42155	0.354089
Wdr43	2.34063	0.354089
Pim3	-0.620907	0.35461
Tpk1	-1.2597	0.354997
Gabpb2	-2.20502	0.355307
Gle1	-2.40195	0.355307
Hnrnpk	-2.09893	0.355307
Itfg1	-2.17494	0.355307
Ogfod3	0.51264	0.355307
Pphln1	-2.28644	0.355307
Rnpep	-2.37383	0.355307
Tbk1	-2.14017	0.355367
Esrp2	-2.14753	0.355401
Itgb4	-2.38601	0.355401
Mthfd1	-2.07752	0.355401
Ang	0.0494373	0.355423
Arf3	-2.31584	0.355581
Cstf3	2.43139	0.355581
Sptlc1	-1.99561	0.355581
Gapvd1	-2.30773	0.355668
Hdgfrp2	-2.39322	0.355668
Gspt1	-1.54418	0.355841
Lypla2	-2.22458	0.355841
Mysm1	-2.19976	0.356184
Taf1d	2.42483	0.358022
Lrrc28	-2.11479	0.359216
Dhdds	0.338068	0.359564
2410018L13Rik	-2.00173	0.359588
Ptbp1	-2.39676	0.359588
Ggnbp2	-1.88386	0.359597
Sertad1	1.89769	0.359732
Xab2	-2.08142	0.359811
Rpl28	-2.41408	0.361573
Chmp4b	-2.19736	0.361728
Igfbp3	-2.2539	0.361728
Rom1	-2.2539	0.361728
Stip1	-2.33778	0.361728
Zdhhc20	-1.33471	0.361728
Zfp516	1.90938	0.361728
Dusp6	2.39067	0.362348
Pdcl3	1.47561	0.36242
S1pr2	2.40375	0.362829
Ndufb9	-2.40559	0.362857
Polg	-2.35474	0.362857
Tango6	-2.25499	0.362857
Usp5	-1.87784	0.362895
Dcun1d3	-2.23888	0.363008
Slc30a5	2.28205	0.363309
Map1s	0.971447	0.363712
Dnajb12	-2.33395	0.364104
Fdx1	-1.96508	0.364929
Tbrg4	0.874655	0.365765
Chmp5	-2.08359	0.366981
Zfand2a	-2.20314	0.367584
Wdr3	-1.50451	0.367649
Tnpo1	1.28215	0.367814
Tnfrsf18	-2.2565	0.368162
Cnot8	1.22436	0.368379
Cxcl1	-2.14309	0.368718
Birc3	1.07314	0.369455
Gas2l3	-0.781399	0.369598
H2afz	1.90672	0.36961
Dag1	1.96072	0.37079
Sptssa	1.49632	0.37079
[truncated: 10,552 more rows]

## Sheet: HF WNTlo
Gene ID	Z score (cKO/Ctrl)	False discovery rate
Rpl35	20.9934	1.73538e-82
Rpp25l	16.5665	1.68358e-54
Mrpl43	16.3021	1.63148e-50
Rpl41	15.2728	1.05251e-44
Nxt1	14.9565	3.97597e-43
Rps7	13.9095	3.40464e-37
Rpl36al	13.415	9.78748e-35
Hist3h2a	-11.3066	2.40494e-29
Rps29	11.9452	1.93938e-27
Mrps34	11.7486	1.43334e-26
Krt5	-11.6256	4.16806e-26
Fdx1l	11.4042	4.89436e-25
Mtch1	-11.371	1.46335e-24
Mrpl46	11.1906	1.93281e-24
Cxcl14	-11.1257	7.50025e-24
Rpl24	-11.0035	2.85669e-23
Itm2b	-10.8426	1.31878e-22
Rpl23a	10.7625	1.94894e-22
Lmna	-10.7591	2.44307e-22
Mrpl14	10.2737	3.11427e-20
Phax	10.2237	5.82852e-20
Gapdh	-9.91309	6.13393e-19
Scand1	9.96428	6.85533e-19
Pkm	-9.79818	8.44962e-19
Atp5c1	-9.7447	3.83138e-18
Rplp2	9.60808	1.36492e-17
Cdk4	-9.07332	2.34288e-17
Hdgf	-9.44626	6.02632e-17
Atp5f1	-9.38865	6.7129e-17
Npm1	-9.23508	3.1474e-16
H3f3b	-9.21646	3.61391e-16
Gadd45gip1	9.149	6.37397e-16
Trim29	-9.15804	6.37397e-16
Gnb2l1	-9.14252	6.41417e-16
Uqcrc1	-9.11197	8.31307e-16
Imp3	8.94181	3.12946e-15
Rpl3	-8.95063	3.12946e-15
Anxa2	-8.90883	3.25087e-15
Mrpl51	8.87618	4.41731e-15
Mbd2	-8.79749	4.82735e-15
Pabpc1	-8.80117	5.32538e-15
Cox7a2l	8.85313	5.54598e-15
Polr2m	-8.87408	6.24557e-15
Ptov1	-8.60033	6.87383e-15
Ywhae	-8.83206	7.11512e-15
Gnas	-8.79338	7.65019e-15
Sar1a	8.5932	1.1115e-14
Rbm15	8.24192	1.58357e-14
Ube2d3	-8.7271	1.66448e-14
Naca	-8.69366	2.0953e-14
Tecr	-8.66161	2.12725e-14
Btf3	-8.65415	2.18574e-14
Krt14	-8.26865	2.2016e-14
Ddb1	-8.42036	2.44292e-14
Ppp1ca	-8.6276	3.13476e-14
Tpgs1	8.61395	3.13476e-14
Cct4	-8.63776	3.15078e-14
Krt17	-8.51756	6.10593e-14
Impdh2	-8.50529	9.06204e-14
Gnb2	-8.28287	1.25712e-13
Stfa3	-5.58792	1.73234e-13
Krt15	-8.37588	1.88543e-13
H2afy	-8.38438	2.05489e-13
Rpl7	-8.37893	2.16775e-13
Fam213a	-8.39142	2.27342e-13
Apex1	7.95103	2.41758e-13
Ubxn1	-7.87443	3.345e-13
Lsm10	8.20899	4.77086e-13
Mrps12	8.24318	5.56178e-13
Polr2l	8.05307	9.89165e-13
Ywhaq	-8.06289	1.01386e-12
Cope	-8.15104	1.07156e-12
Eif4h	-8.17304	1.10921e-12
Pop7	8.06632	1.36221e-12
Uqcrfs1	8.12974	1.36221e-12
Atp5b	-8.06856	1.81037e-12
Trp53	-7.83169	2.22626e-12
Eif4a1	-7.94954	2.70241e-12
Mad2l1bp	7.88856	2.91473e-12
H3f3a	-8.009	3.29427e-12
Cdc42ep5	7.90354	3.56535e-12
Phgdh	-7.85881	5.20107e-12
Hnrnpa1	-7.82651	9.3816e-12
Gemin7	7.82895	1.03112e-11
Dynlrb1	-7.82292	1.31378e-11
Pebp1	-7.62794	2.36225e-11
Polr1d	7.71227	2.48186e-11
Anapc5	-7.51622	3.50846e-11
Tspan3	-7.66802	4.00482e-11
Hist1h1c	-7.38884	5.22331e-11
Ybx3	-7.49201	5.7474e-11
Morf4l1	-7.46741	6.17314e-11
Nasp	-7.19758	6.5368e-11
Ndufa11	-7.52011	6.5368e-11
Hebp1	6.46595	7.5202e-11
Acp1	-7.49802	7.56852e-11
Txnl4a	7.4022	7.7563e-11
Arl4c	-7.56167	8.33851e-11
Ybx1	-7.51302	8.71522e-11
Gltscr2	-7.3685	1.26006e-10
Cdc42	-7.20649	1.81416e-10
Pcbp2	-7.37383	2.09279e-10
Mplkip	-7.36981	2.40876e-10
Etfb	-7.36612	2.93065e-10
Bmp7	-7.36803	3.30092e-10
Bzw2	-7.31466	3.91404e-10
Gcat	-7.33226	4.07874e-10
Bag1	-7.0772	5.86368e-10
Pafah1b3	-7.24584	6.09472e-10
Ndufv2	-7.26569	6.32093e-10
Ccdc85b	7.08437	6.7627e-10
Nt5dc2	-7.22651	7.87811e-10
Psmd6	-7.0926	9.61378e-10
Dstn	-6.96766	1.21131e-09
Cd81	-7.14398	1.3917e-09
Pelo	7.07915	1.57189e-09
Srp19	6.93222	1.83906e-09
Rps21	7.06747	2.13465e-09
Med29	6.71631	2.22225e-09
Uchl3	-6.97189	2.22225e-09
Psmc4	-7.00598	2.24021e-09
Gpx4	-7.05166	2.29478e-09
Hmgn1	-6.87256	2.52062e-09
Psma7	-7.03392	2.56453e-09
D8Ertd738e	6.9983	2.88347e-09
Ppic	-6.81706	3.51726e-09
Pck2	6.86081	3.6506e-09
Actr3	-6.53009	4.58252e-09
Ap2m1	-6.93318	4.58252e-09
Psmb6	-6.82927	4.58456e-09
Nop10	6.8942	4.6296e-09
Cyb5r3	-6.84326	4.64224e-09
Eif3k	-6.84364	4.64224e-09
Eif5a	-6.87864	4.64224e-09
Mtch2	-6.73179	4.78941e-09
Hnrnpab	-6.80731	5.34274e-09
Fam32a	6.86656	6.02132e-09
Rp9	6.87057	6.62445e-09
Gnai2	-6.82296	7.585e-09
Tmem11	6.71494	7.9052e-09
Rnaseh2b	-6.83556	8.02498e-09
Prr7	6.71394	9.0311e-09
Smarcd2	-6.584	9.17789e-09
Prdx2	-6.77707	1.08702e-08
Trim28	-6.16054	1.13529e-08
Sde2	6.45183	1.18664e-08
Pdlim1	-6.61085	1.31571e-08
Rpl14	-6.75518	1.41356e-08
Pkp3	-6.62555	1.45774e-08
Cct7	-6.2762	1.54391e-08
Gpatch4	6.476	1.5595e-08
Ppp2r1a	-6.75401	1.5595e-08
Aldh2	-6.72954	1.76048e-08
Dph3	6.68934	1.78305e-08
Set	-6.69978	1.90778e-08
Mlf2	-5.68055	2.17117e-08
Cdc37	-6.22661	2.23003e-08
Atp5a1	-6.62234	2.2439e-08
Fabp5	-5.91182	2.2439e-08
Rpl4	-6.65926	2.46586e-08
Psmc3	-6.56988	2.8114e-08
Ass1	-6.64867	2.83211e-08
Gdi2	-6.57059	2.87772e-08
Cct5	-6.62715	2.8823e-08
Rps27	6.50778	3.02842e-08
Fkbpl	6.4401	3.3421e-08
Degs1	6.5462	3.4402e-08
Vcp	-6.36716	3.55662e-08
Ndufb10	-6.57056	3.57949e-08
Rnh1	-6.27441	4.01802e-08
Txnrd1	-6.36757	4.42299e-08
Raly	-6.41682	4.87265e-08
Atp5g1	-6.43429	5.75203e-08
Ryk	-6.39444	6.12837e-08
Llph	6.06181	6.5558e-08
Pitpna	-6.03389	6.97617e-08
Psma2	-6.48153	7.05125e-08
Snapc5	6.25812	7.06448e-08
Eif3m	-6.43321	7.26633e-08
Med7	6.37199	8.44743e-08
Alyref	-6.44418	8.78861e-08
Tkt	-6.40844	8.97262e-08
Chchd5	6.37785	9.84482e-08
Fxn	6.36124	1.0572e-07
Kif21a	-6.21217	1.21001e-07
Ccdc59	6.37727	1.23543e-07
Prelid1	-6.37724	1.24807e-07
Snx17	-6.38265	1.30929e-07
Psmb4	-6.14672	1.3898e-07
Acot1	6.34981	1.41954e-07
Psmd4	-6.17088	1.61193e-07
Rps6	-6.3233	1.71137e-07
Sdhb	-6.27461	1.78944e-07
Eif3e	-5.89453	1.81868e-07
Ldha	-6.06841	2.06128e-07
Paics	-6.22488	2.13735e-07
Emc6	6.21384	2.21351e-07
Rpp38	6.03397	2.27877e-07
Bola1	6.08554	2.46439e-07
Postn	-5.91165	2.47062e-07
Rpl22l1	-6.25704	2.47062e-07
Rhog	6.17336	2.71276e-07
Krcc1	6.22527	2.90574e-07
Rbm5	-6.21311	3.05026e-07
Glrx3	-6.03534	3.05178e-07
Atg101	6.16286	3.05593e-07
Exosc4	6.08447	3.56125e-07
Rps2	-6.18873	3.58029e-07
Cox4i1	-6.1839	3.66988e-07
Bzw1	-6.18862	3.6748e-07
Psmd8	-6.11509	3.6748e-07
Wdr18	6.06454	3.67589e-07
Thrap3	-6.193	3.67714e-07
Mpnd	-6.16035	3.69744e-07
Pi4k2b	-6.10869	3.75544e-07
Txn2	-6.13714	3.87264e-07
Atp5o	-5.60203	4.00068e-07
Eif3f	-6.04657	4.11261e-07
Gmps	-5.97228	4.13364e-07
Lgals1	-1.80539	4.37726e-07
Itm2c	-6.12689	4.5247e-07
Ythdc1	6.04771	4.5247e-07
Atxn10	-6.11726	4.56383e-07
Rrp15	6.07094	5.28454e-07
Tpt1	-6.10033	5.67496e-07
Cops3	-6.09534	6.22045e-07
Prpf19	-6.0943	6.22045e-07
Mrpl57	6.07467	6.34495e-07
Med21	6.0707	6.35577e-07
2310009B15Rik	-5.96073	6.62701e-07
Etf1	-6.06039	6.97054e-07
Uqcrc2	-5.96948	7.74542e-07
Actn4	-5.90539	7.87093e-07
Snd1	-5.63416	8.65342e-07
Lcmt2	5.87336	8.89671e-07
Ndufb9	-5.03561	9.12191e-07
Rps27rt	5.98736	9.12191e-07
Tbcc	5.90671	9.31043e-07
Sfn	5.97713	9.62543e-07
Ddx5	-5.97847	1.01026e-06
Sugt1	-5.99996	1.02472e-06
Bsg	-5.81739	1.04514e-06
Grpel1	5.83892	1.04514e-06
Sf3b2	-5.93605	1.04514e-06
Mcm7	-5.9558	1.07875e-06
Rpl5	-5.975	1.09404e-06
Oxct1	-5.77489	1.15564e-06
Arpc1a	-5.81682	1.17296e-06
Cct2	-5.56915	1.17296e-06
H2afx	-5.94681	1.20349e-06
Fth1	-5.9419	1.30353e-06
Psap	-5.84015	1.48764e-06
Ctbp1	-5.88055	1.60518e-06
Dek	-5.84939	1.7284e-06
Txnl1	-5.89438	1.77441e-06
Mrps24	5.87364	1.84645e-06
Tipin	-5.65606	1.93882e-06
Eif2s1	-5.76699	2.13728e-06
Ndufaf1	5.80766	2.16309e-06
Tbrg1	-5.85423	2.16836e-06
Spr	5.67797	2.19064e-06
Tst	5.68263	2.26963e-06
Gars	-5.62498	2.28195e-06
R3hdm4	-5.28839	2.28739e-06
Atp1a1	-5.83937	2.32721e-06
Ncl	5.82226	2.37533e-06
Ctnnb1	-5.15366	2.42138e-06
Coa7	5.75515	2.48741e-06
Nnat	-4.71425	2.50338e-06
Nudt21	-5.79753	2.50338e-06
Rrs1	5.80704	2.50338e-06
Arhgdib	-5.81639	2.60988e-06
Ash2l	-5.81374	2.61541e-06
Cyc1	-5.80707	2.67795e-06
Tpd52	-5.80959	2.67795e-06
Rab2a	-5.79882	2.80833e-06
Eif3g	-5.6491	2.83649e-06
Mt1	5.39788	3.22345e-06
Micu1	-5.70854	3.3214e-06
Mgst1	3.39276	3.39679e-06
Rpl29	5.7458	3.60267e-06
Mdh1	-5.55807	3.6359e-06
Zfp637	5.71228	3.9407e-06
Cops4	-5.33778	4.06616e-06
Tssc4	5.6965	4.30337e-06
Tcf3	-5.61152	4.31155e-06
Uqcrq	5.69725	4.5346e-06
Adh5	-5.68116	4.58578e-06
Eif4g2	-5.53652	4.64353e-06
Son	5.58662	4.64447e-06
Srp54b	-5.67225	4.85102e-06
Mettl3	-5.59821	4.86911e-06
Sub1	-5.60921	5.2826e-06
Eif3c	-5.66145	5.32111e-06
Mpc1	-5.55727	5.35866e-06
Ube2m	-5.60255	5.39122e-06
Ube2d2a	-5.51555	5.40936e-06
Mff	-5.47711	5.63676e-06
Hnrnpk	-5.58865	5.86396e-06
Fam212a	5.51747	6.06134e-06
Mdh2	-5.63801	6.11061e-06
Eif4e2	-5.50305	6.1374e-06
Fam92a	-5.50714	6.50555e-06
5930412G12Rik	5.32854	6.97362e-06
Dcn	-5.10983	6.98339e-06
Timm13	5.13877	6.98339e-06
Psmb7	-5.55332	7.09038e-06
Bnip3l	-5.4331	7.21539e-06
Tprgl	-4.93489	7.22361e-06
Pdcd5	-5.58789	7.24177e-06
Srpr	-5.60014	7.24177e-06
Smarcb1	-5.60599	7.44932e-06
Prkar1a	-5.44679	7.55206e-06
Idh3a	-5.32463	7.91564e-06
2010005H15Rik	-0.660256	8.51088e-06
Pttg1	-5.26225	8.81462e-06
Pdgfc	-5.51724	8.86891e-06
Btbd2	-5.56041	9.17597e-06
Bag6	-5.11804	9.34706e-06
Mcm6	-5.48244	9.58735e-06
Fkbp8	-5.41435	9.88546e-06
Fkbp3	-5.51475	1.01451e-05
Snn	-5.51226	1.04139e-05
Psmc6	-5.50191	1.04212e-05
Nudt7	5.30478	1.05463e-05
Dlat	-5.48317	1.13669e-05
Arpp19	-5.49543	1.16781e-05
Ube2e1	-5.5112	1.17227e-05
Esd	-5.44412	1.19694e-05
Rbbp4	-5.42137	1.21256e-05
Cox8a	5.36151	1.22373e-05
Seh1l	-5.3743	1.23662e-05
Ppid	-5.28467	1.24348e-05
Cdkn1c	-5.28369	1.29997e-05
Hmox2	5.4691	1.31331e-05
Tradd	5.43525	1.31879e-05
Mrpl16	5.43394	1.32562e-05
Sac3d1	5.45272	1.33149e-05
Avpi1	5.46492	1.33642e-05
Smim15	5.42306	1.36146e-05
Rtn4	-5.34674	1.47247e-05
Ythdf2	5.44064	1.47708e-05
Rpl18	-5.45166	1.49794e-05
Knop1	5.44161	1.49813e-05
Arf5	-5.43634	1.55401e-05
Tmed2	-5.44323	1.56832e-05
Ggnbp2	-4.15031	1.57752e-05
Pgam1	-5.36715	1.65537e-05
2700060E02Rik	-4.96505	1.8331e-05
Gstk1	-5.31984	1.8331e-05
Bre	-4.89556	1.9162e-05
Cfl1	-4.91884	1.94482e-05
Mt2	5.35098	1.95411e-05
Capzb	-5.36993	1.96158e-05
U2af1	-4.85302	2.05882e-05
Gata3	-5.37335	2.07876e-05
Hnrnpu	-5.10746	2.07876e-05
Csnk1a1	-5.35622	2.12031e-05
Acaa2	-5.32884	2.13327e-05
Atpif1	-5.28979	2.16089e-05
Oard1	-5.36253	2.20121e-05
Vdac2	-4.83173	2.29276e-05
Znhit2	5.31006	2.32133e-05
BC100530	-3.03033	2.39174e-05
Dctn1	-5.34951	2.39174e-05
Usp22	-5.24797	2.40336e-05
Dynll1	5.34216	2.40518e-05
Smim20	-5.34524	2.44225e-05
Tor1aip2	-5.31104	2.45126e-05
Tnrc6c	5.32588	2.61412e-05
Copg2	-5.121	2.65583e-05
Etfa	-5.26976	2.97797e-05
Cct8	-5.27267	3.23001e-05
Uhrf1	-5.08774	3.25941e-05
Prdx5	-5.2872	3.33449e-05
Bcam	-5.09664	3.45875e-05
Psma1	-5.26422	3.56216e-05
Ddx1	-5.25681	3.58039e-05
Psmc5	-5.16065	3.66947e-05
Rrm1	-5.26318	3.77416e-05
Fkbp4	-5.19876	3.93246e-05
Cnbp	-4.94709	3.9568e-05
Lrrc59	-5.25165	3.98412e-05
Ugp2	-4.92498	4.03351e-05
Tuba1a	-4.86025	4.03879e-05
Gimap9	5.13436	4.3636e-05
Tars	-5.11792	4.3636e-05
Lgals9	-5.09062	4.58124e-05
Ddx39b	-5.09844	4.68055e-05
2300009A05Rik	5.09719	4.79772e-05
Eprs	-4.97038	4.9106e-05
Mrps18c	-4.92711	4.95716e-05
Vim	-4.02412	5.1845e-05
Grcc10	5.08828	5.35576e-05
Ucp2	-5.18816	5.35576e-05
Chchd1	5.17142	5.58862e-05
Ldhb	-5.0992	5.89145e-05
Sepp1	-3.29357	5.97826e-05
Eny2	-5.13284	6.04162e-05
Pfdn1	-5.067	6.0425e-05
Slc38a4	-5.15003	6.32642e-05
Nudt2	4.90627	6.51185e-05
Myeov2	4.95642	6.74712e-05
Lmnb1	-4.48546	6.78427e-05
Ppib	-4.56955	7.354e-05
Tyms	-4.96853	7.48556e-05
Sumo2	-4.79705	7.78932e-05
Irx1	-5.05637	7.83873e-05
Tfg	-4.81799	7.95822e-05
Tpi1	-5.08054	8.2406e-05
Smarca4	-5.06978	8.30756e-05
Dnpep	-5.01453	8.32809e-05
Eif3d	-5.07961	8.5245e-05
Prpf38a	-5.08121	8.70479e-05
Gsto1	-4.95803	8.79999e-05
Fam173b	-4.30384	9.28899e-05
Bmyc	5.04047	9.36147e-05
Sf3b6	-4.64459	0.000100928
Mcm4	-5.04195	0.000102169
Ube2k	-5.03681	0.000103139
Rchy1	-4.57656	0.000104651
Higd1a	-4.9744	0.00010472
1700021F05Rik	5.01661	0.000105625
Wif1	-4.7449	0.000106919
Hnrnph1	-5.01717	0.000109499
Gng5	-4.88361	0.000114262
Rnf10	-5.011	0.000117396
Ywhaz	-4.94416	0.000119703
Hells	-4.93827	0.000120238
Suclg1	-4.52902	0.000120238
Fam216a	-4.92706	0.000122162
Brap	-4.87173	0.000126064
Dync2li1	-4.97396	0.000126064
Gsn	-4.96303	0.000127018
Nop14	-4.93886	0.000127281
Adk	-4.33725	0.000128437
Oser1	4.9733	0.000130302
Rabac1	-4.98008	0.00013094
Mthfd1	-4.91273	0.000134896
2510002D24Rik	-4.98099	0.000135723
Malat1	4.97352	0.000136998
Tmem147	-4.97518	0.000138856
Anxa1	-4.83305	0.000139089
Abhd16a	-4.94293	0.00014459
Blmh	-4.96239	0.00014459
Mrps7	4.64894	0.000144677
Smarca5	-4.88508	0.000147595
Rnf126	-4.91735	0.000150612
Fuom	4.37958	0.000153144
Ptrhd1	-4.31123	0.000153144
Srsf5	-4.83217	0.000155386
Dnajc7	-4.93746	0.000156878
Cdc26	3.95196	0.000165667
Map2k5	-4.90068	0.000165889
Mrpl12	4.9117	0.000165889
2210016L21Rik	-4.87385	0.000167236
Uba2	-4.88576	0.00017768
Tk1	4.86119	0.000179379
Abt1	4.71568	0.00018657
Mrpl54	4.87144	0.000188291
Eif4b	-4.89722	0.000194664
Mrpl15	4.84381	0.000197562
Mars	-4.44922	0.00019888
Dap3	-4.62305	0.000217434
Dut	-4.86636	0.000220785
Psph	-4.84337	0.000221831
Chchd2	-4.85318	0.00023157
Rhoa	-4.7767	0.00023157
Cbr2	-4.82872	0.000235404
S100a14	-4.8207	0.00024345
A730017C20Rik	-3.82921	0.000244319
Hspa14	-4.73546	0.00024573
Rpl8	-4.83767	0.000246449
Snx5	-4.82607	0.000249847
Ezh2	-4.82837	0.000250121
Dazap2	-4.10886	0.000253254
Sox4	-4.79584	0.000257152
Akr1a1	-4.76747	0.000258968
Ddx28	4.52711	0.000265022
Stfa1	-3.98932	0.000266125
Timm17a	4.80272	0.00027657
Atp5k	4.58757	0.000276593
Mxd4	-4.34501	0.000276704
Vapb	-4.66432	0.000277243
Traf2	-4.78206	0.000293537
Psmd7	4.62995	0.000303141
Zwint	-4.76701	0.000319124
Akirin2	-4.60922	0.000324974
Anxa5	-4.52554	0.00032938
Eif1a	4.73405	0.00032938
Mapk13	-4.76542	0.00032938
Nck1	4.47104	0.00032938
Cisd2	-4.71417	0.000333714
Tspan18	-4.67618	0.000344227
Snrpn	-4.71623	0.000350804
Sumo3	-4.74349	0.000354865
Cops6	-3.93626	0.000356622
Smarcc1	-4.73661	0.000358941
Tmem167	4.59027	0.000358941
BC005561	4.72834	0.000359221
Psmb2	-4.61924	0.000360364
Sdha	-4.38368	0.000373984
Commd5	4.57258	0.000374728
Ctnnbl1	-4.65824	0.000382276
Col9a3	-4.23834	0.000382744
Cdk2ap1	-4.29642	0.000389072
Coro1b	-4.41194	0.000390353
Bcl11a	4.59252	0.000394728
Ptbp1	-4.68514	0.000402795
Cltb	-4.62766	0.00040476
Upp2	-4.34999	0.000404801
Hist3h2ba	-4.68586	0.000411106
Cox5a	-4.53162	0.000429829
Psma3	-4.6905	0.000429829
Pex13	4.63147	0.000434357
Strap	-3.45113	0.000434357
Ankrd10	4.68561	0.000442186
Gramd3	-4.52842	0.000442186
Perp	-4.55405	0.000458351
Rab6a	-4.57579	0.000470752
Ckb	-3.86547	0.000478832
Dnmt1	-4.55298	0.000480249
Tmod3	-4.61628	0.000480682
Usp50	4.56654	0.000482372
Nudt19	4.54295	0.000502909
Atp6v0d1	-4.65939	0.000507064
Sil1	4.50968	0.000507525
Rars	-4.55524	0.000507742
Snx6	-4.42944	0.000511522
Gpsm2	-4.40448	0.000512494
Hdac5	-4.63547	0.000531161
Eif2s2	-4.64739	0.000531503
Ssbp3	-4.60589	0.000542947
2810417H13Rik	-4.27572	0.0005456
Espn	-4.63258	0.0005456
Gabarap	-4.51414	0.0005456
Glo1	-3.92883	0.0005456
Reep5	-4.56868	0.0005456
Csnk2b	-4.56531	0.000555423
Comt	4.45337	0.000568207
Hadh	-4.13996	0.000570851
Fkbp1a	-4.62324	0.000574775
Nup50	4.3819	0.000584686
Wtap	-1.1888	0.000584686
Ciz1	-4.40813	0.000594778
Nudt1	4.52518	0.000596898
Rbfa	4.57599	0.000596898
Trappc6a	-4.53482	0.000596898
Zfp593	4.56589	0.000596898
P4hb	-4.53899	0.000599516
Bop1	-4.59983	0.000603339
Pdap1	-4.53985	0.000613104
Ywhah	4.59332	0.000613104
Bclaf1	-4.50934	0.00061465
Sap30bp	4.31336	0.00061465
Coa6	4.40893	0.000627456
Fam114a2	-4.21008	0.000639908
Mcm2	-4.53039	0.000641146
Hspa4	-4.56492	0.000641943
Rfxap	-4.5503	0.00065515
Snrpb2	4.53102	0.000658289
Mrpl42	-3.50852	0.000678414
Gmds	-3.54538	0.000685139
Rps3a1	-4.57848	0.000690207
Aimp1	-4.40926	0.000702856
Skap2	-4.56744	0.000702856
Psmc1	-4.56272	0.000705638
Sltm	-4.10352	0.000717048
Srsf11	-3.9392	0.000722185
Mcm5	-4.43432	0.000736393
Zdhhc16	-4.51917	0.000744793
Rab14	-4.49917	0.000748992
Vdac1	-4.54859	0.000755418
Mest	-3.66669	0.000760419
Pus1	4.32725	0.000760419
Hyal2	4.41389	0.000765242
Ap2a2	-4.24875	0.000770221
Tcf25	-4.4412	0.000773732
Nedd4	-4.32757	0.000817536
Srsf2	-4.4728	0.000833635
Rbm4b	4.34829	0.00088976
Ewsr1	-4.4847	0.000897485
Ptn	-4.16647	0.000903448
Mrpl23	-3.76056	0.000918362
1110004F10Rik	-4.11038	0.000944005
Haus6	2.05673	0.000946185
Pik3r2	-4.46658	0.000987106
Tomm20	-4.39802	0.000998851
Copb2	-4.45913	0.00103229
Hoxc8	4.1091	0.00103327
Copz1	-4.48235	0.00103333
Ap2s1	-4.44324	0.00103622
Dbnl	-3.74158	0.00104207
Limd2	-4.44259	0.00104268
Nisch	-4.47665	0.00105174
Rab34	-4.4602	0.00105564
Arf6	4.45831	0.00107797
Pdlim5	-4.45782	0.00107928
Qars	-4.36732	0.00109772
Ywhab	-4.44087	0.00109772
Haus1	-4.44739	0.00110896
Uqcr10	4.451	0.00113482
Ifitm3	2.16716	0.001164
Eif3h	-4.32595	0.00116965
Pfdn5	4.26982	0.00116965
Jup	-4.44593	0.00118072
Hoxa2	3.11176	0.00118097
Rcn3	-1.68078	0.00120745
Dazap1	-4.41705	0.00121767
Scel	-4.02067	0.00122964
Clta	-4.15343	0.00123793
Pola2	-4.24556	0.00123939
Hsph1	4.32776	0.0012908
1700037H04Rik	-4.35587	0.00132084
AU022252	4.32876	0.00132084
Gstp1	4.05242	0.00132791
Sgta	-4.3201	0.00133759
Tfap2c	-3.96226	0.00133873
Emc2	-4.18738	0.00134156
Farsa	-4.28486	0.00136055
Nit2	-4.39107	0.00136055
Zw10	-4.21777	0.00138718
Mapk3	-4.36005	0.00139361
Pdcd10	-4.28674	0.00140243
Hadhb	-4.29953	0.00141535
Pcbd2	-4.38516	0.00142136
Dcaf7	-3.85585	0.00142232
Smim14	-4.27561	0.00142483
Ndufa9	-3.67764	0.00144965
Psat1	-4.38431	0.00146009
Tmem248	4.14978	0.00146479
Khdrbs1	-4.36098	0.0014691
Rpl13	4.3818	0.00147126
Psmd1	-4.38125	0.00149198
Nap1l4	-4.21142	0.00150204
Mrpl34	4.28572	0.00152218
Ndufs2	-4.28955	0.00152218
Ccna2	-3.27485	0.00153834
Rad23b	-4.1391	0.00158095
Ccnd3	-4.3632	0.00160092
Ddx24	4.33608	0.00161047
1810058I24Rik	4.23965	0.00163621
Ndnl2	4.34443	0.00163773
Akt1	-4.32768	0.00165104
Zcchc17	4.22745	0.00165823
Stk25	-4.34358	0.00172377
Mrps6	4.23165	0.00172639
Gfer	4.31444	0.0017916
Cntfr	-4.03858	0.00180384
Cpa6	-3.66234	0.00180384
Pcmt1	-3.83656	0.00180384
Rpl10a	-4.32292	0.00183113
Rnf187	-4.25504	0.00183464
Tcp1	-4.32015	0.00183464
Wdr70	-3.84953	0.00183464
Med18	4.27205	0.00183784
Selt	-4.2822	0.00185786
Bola2	4.29704	0.0018602
Pou2f3	-4.19907	0.00188326
Katna1	-4.20136	0.00188716
Prpf40a	-4.3022	0.00190287
Luc7l2	-4.05295	0.00191673
Tmem70	4.28918	0.0019214
C1qbp	4.30358	0.0019215
Ndufaf2	4.27663	0.00194203
Rab10	-4.26141	0.00194921
Capza2	-4.04856	0.00195048
Coa3	4.17155	0.00195616
Eif4g3	-3.93501	0.00196941
Tuba1b	-2.34524	0.00198217
Cuta	-4.17508	0.00198219
Hdac1	-3.75452	0.00198324
Rell1	-4.2996	0.00198687
Arl4a	4.2574	0.00198958
Echs1	-4.09396	0.00198958
Tnfrsf18	-4.22727	0.00198958
Idh1	-4.0564	0.0020118
Atad2	-3.72578	0.00202797
Srp68	-4.09458	0.00204544
Rtn3	-4.27656	0.00206624
Emc10	-4.14815	0.00206839
Itgb4	-4.20306	0.00208119
Twistnb	4.25939	0.00208671
Tmem123	-4.24345	0.00209805
Cd9	-4.27337	0.00209868
Pgp	4.24575	0.00215663
Dync1h1	-3.61021	0.00215758
Tomm7	4.18357	0.00215758
Spsb2	4.07696	0.00216686
Ranbp1	-4.26718	0.0021713
Lasp1	-4.05318	0.00217543
Zfp706	-4.16183	0.00222845
Myb	-3.8597	0.00228392
Tspan5	-3.77527	0.00228392
Gm1673	-4.2516	0.00228882
Actr10	-4.25558	0.00230911
Leprot	-4.25336	0.00233658
Ndufs8	-4.23623	0.00236645
Wdr1	-4.09371	0.00238235
Vamp7	-4.24337	0.00241949
Ndufb8	-4.23714	0.00242466
Reep3	-3.90631	0.0024276
Bet1	-4.20983	0.00254243
Uchl5	-4.22401	0.00254333
Zyx	-4.08254	0.00254333
Myl6	-4.19843	0.00258046
Prmt1	-4.20946	0.00258764
Tdg	-4.22439	0.00260774
Yif1a	-4.13783	0.00261007
Rps17	-4.21741	0.00263098
Bub3	-3.27644	0.00264458
Rab5c	-4.14247	0.0026483
Itpa	-3.7252	0.00265813
Rexo2	-4.21758	0.00265815
Hdac3	-3.9128	0.00267568
Nudc	-4.05227	0.00267568
Ube2b	-4.04354	0.00268547
Mgp	0.592357	0.00271108
Fam162a	-4.01828	0.00273298
Gpn2	4.13683	0.00274958
Mrpl27	4.18923	0.00275164
Sri	-3.91481	0.00275164
Hnrnpul2	-4.20209	0.00276099
Creb5	-4.09204	0.00278006
Serp1	-4.20105	0.00280992
Hras	-3.80033	0.0028383
Mat2b	-3.84623	0.0028383
Rps15	4.19281	0.00284737
Cox14	4.18565	0.0028624
Brf2	4.11875	0.00286726
Spc25	-3.9486	0.00287003
Tmco1	-3.99991	0.0029053
Baiap2	-4.1828	0.00297778
Ppp1cc	-4.17171	0.00297778
Ube2s	-4.10658	0.00298352
2700094K13Rik	-4.16007	0.00301743
Lamp1	-3.92863	0.00304467
Tspan31	-2.95278	0.00304467
Cox19	3.75481	0.00307051
Ngdn	-4.1059	0.00307648
Tbce	-4.00803	0.00308447
Med28	4.16758	0.00308535
Eif4a2	4.115	0.00310083
Bdnf	3.84318	0.0031071
Hint2	-3.92602	0.00310852
Med22	-4.14229	0.00311787
Psmd9	-4.14315	0.00311787
Kdelr1	-4.1565	0.00313729
Pycard	4.03536	0.00313729
Sox11	1.09916	0.00313729
Rpa1	-3.90163	0.00317649
Xrn2	-4.1593	0.00319095
Cetn3	-4.14741	0.0032356
Med25	-4.12912	0.00332794
Pigyl	4.13506	0.00333661
Tnfaip8	4.11084	0.00335744
Mcmbp	-4.02061	0.00338566
Ubap2l	-4.08981	0.00340554
Ube3c	-4.11584	0.00347471
1700109H08Rik	NA	0.00347538
Ndufaf6	-0.960676	0.00348754
Nfkb1	-3.78065	0.00351787
Acot7	-4.01601	0.0036043
Chchd6	-3.68548	0.00360967
Kpnb1	-3.73291	0.00360967
Mrps33	3.69247	0.00360967
Ptpra	-4.08006	0.00362391
Rpl37a	4.12055	0.00364226
Psmb3	-3.87658	0.00368179
Rbms2	4.10771	0.00368179
Srp14	-4.11588	0.00368633
Actr1a	-4.11641	0.00372477
Pltp	-4.11683	0.00373318
Tefm	3.49749	0.0037342
Zfp281	4.02316	0.0037342
Fam96a	-4.10778	0.00375434
Fjx1	-4.0194	0.00379803
Nedd8	-3.50071	0.00379803
Arf3	-3.83583	0.00382772
Psmd13	-4.10822	0.00383628
Spint2	-3.94417	0.00386257
Rpl11	4.09972	0.00389863
Nt5c	4.03669	0.00392997
Hmgn2	4.09335	0.00395402
Ssrp1	-4.05141	0.00396696
Csde1	-4.09701	0.0039679
Shmt1	-3.56335	0.00398488
Umps	4.06542	0.00403288
Gtf2i	-4.08623	0.00403762
Mrpl13	-3.58327	0.00404807
Alcam	-4.04204	0.00409463
Gorasp2	-4.0297	0.00411496
Chmp6	-3.82421	0.00412024
Nelfe	-4.01496	0.00412428
Stc1	-3.50541	0.00418832
Cttn	-3.80376	0.00435231
Rnf11	-4.06911	0.00435231
Akr1e1	-3.8938	0.00438074
Lsm12	-4.00285	0.00441774
Rpn2	-3.9119	0.00441776
Hat1	-4.04613	0.0044207
Strn4	-4.02598	0.00449479
Hnrnpl	-4.06031	0.00450483
Tubd1	-3.95036	0.00453553
Mboat2	-4.0124	0.00453577
Jund	-3.16272	0.00455892
Pafah1b1	-4.04581	0.00461735
Ssb	-3.87066	0.00463211
Cenpn	-3.76591	0.00469404
Rrp1	-3.59996	0.0047382
Uqcr11	3.90993	0.0047382
Med16	-4.00976	0.00478416
Tmem238	3.88005	0.00489854
Mrps17	4.02791	0.00494032
Sec24d	-3.90219	0.00494032
Socs2	3.85627	0.00494032
Csrp1	-3.96996	0.00507669
Tgfb1	-3.64803	0.00508535
Utp18	-4.01985	0.00508535
Fxr1	-3.65246	0.00511578
0610009B22Rik	3.86886	0.00515516
Rragc	-3.98176	0.00517883
Nenf	3.98465	0.00523061
Ndufs4	-3.9608	0.00527444
Snrnp40	-4.00688	0.00527444
Fahd1	3.77489	0.00529331
Polr2a	-3.79006	0.00529541
Rxrb	-3.99514	0.00532694
Memo1	-3.81578	0.0053829
Mnat1	-3.92124	0.00541033
Nupl1	-3.81715	0.0054163
Flywch2	-3.98586	0.0054643
Uqcrb	-3.98766	0.0054643
Pigp	-3.92277	0.00549184
Jagn1	3.98125	0.00555108
Thoc5	-3.9818	0.00559525
2310036O22Rik	3.96457	0.00564776
Prmt7	-3.79496	0.00566214
Rac1	-3.79458	0.00569779
Abo	-3.58908	0.00572322
Lsm14a	-3.98786	0.00573173
Mrto4	3.82604	0.00573173
Bend5	-2.82668	0.00575231
Ddx41	-3.96611	0.00575231
Tra2a	-3.89407	0.00575231
Rab7	-3.83019	0.00579495
Apip	-3.97488	0.00584204
Usp34	-3.85571	0.00588472
Gadd45a	-3.93969	0.00589992
Fscn1	-3.97665	0.00590715
Ndufa10	-3.87471	0.00590819
Cux1	-3.84489	0.00591512
Cdca5	3.65148	0.00592805
E2f1	-3.9452	0.00592805
H2afy2	-3.96385	0.00592805
Lrrc56	-3.51101	0.00592805
Ube2i	-3.91428	0.00592805
Lrwd1	-3.95283	0.00595391
Fxyd6	-3.92323	0.006058
Ssbp2	-3.88569	0.006058
Sec62	3.93237	0.00622928
Ddx39	-3.7636	0.00623666
Tnfaip8l1	3.01432	0.00637149
Syce2	-3.6955	0.00644991
Tax1bp1	-3.93159	0.00646241
Ubqln1	-3.77046	0.00646241
Armc5	-3.68033	0.00659458
Birc5	3.76183	0.00659458
Cdca7	-3.94111	0.00659458
Hmbs	-3.93357	0.00664011
Mcm3	-3.67874	0.00666221
Rplp0	3.93783	0.00666221
Rpf1	-3.8221	0.00682068
Zfp385a	-3.92921	0.00688911
Rad51	-3.92064	0.00689871
Mettl16	3.61486	0.00690463
Apoc1	-3.65477	0.00697975
Tbc1d7	-3.90911	0.00698699
0610012G03Rik	3.87892	0.00698778
Hist1h2ap	3.82711	0.00703584
Gnb1	-3.92113	0.00703933
Dact2	3.75109	0.00706782
Ptges3	-3.92015	0.00708365
Xrcc5	-3.8719	0.00709185
Nthl1	-3.88178	0.00712975
S100a16	-3.74953	0.00714824
Nusap1	-3.29749	0.00715033
Sf3a3	-3.89951	0.00725856
4833420G17Rik	3.12068	0.00727835
Cdc42se1	-3.87871	0.00728465
Cdca3	-1.22958	0.00728465
Mpdu1	-3.1448	0.00730049
Tex261	-3.74192	0.0073206
Cotl1	-3.89351	0.0073878
Ccdc102a	3.68456	0.00741439
Shfm1	3.22834	0.00741439
Bhlhe40	3.88168	0.00745268
Ilk	-3.90139	0.00747564
Actl6a	-3.88192	0.00750124
Gtf2h5	3.89461	0.00750124
Kctd20	-3.78661	0.00751074
Phospho2	3.66285	0.0075902
Acd	-3.87882	0.00766345
Dnaja3	-3.75228	0.00766345
Tmem59	-3.54192	0.0076666
Col12a1	-2.6438	0.00770457
Mrpl44	3.85063	0.00771254
Lamtor1	-3.8	0.00776053
Rap1b	-3.88095	0.00776053
Sh3bp1	-2.87053	0.00777414
Lysmd2	3.87402	0.00780903
Cwc27	-3.77309	0.00782036
Slco3a1	3.31539	0.00782036
Emc3	-3.84102	0.00784645
Rps15a	3.88069	0.00793796
Arhgef1	-3.79428	0.00801747
Ergic3	-3.38563	0.00801747
Rpl9	3.857	0.00807112
Fam210a	3.84004	0.00817834
Hist1h1b	-2.7426	0.00821114
Golga7b	-3.83195	0.00827053
Cdadc1	3.80001	0.00831332
Rbmxl1	3.86278	0.00831332
Selenbp1	-3.78598	0.00833462
Sfxn3	-3.82439	0.00838803
Clpx	-3.7716	0.00853156
Ssu72	3.84818	0.00856302
Eps15l1	-3.84417	0.00865324
Aplp2	-3.82882	0.00872115
Rnf170	-3.66344	0.00872855
Vkorc1	-3.77422	0.00872855
Gm561	3.82773	0.00879255
Nsmce4a	-3.78044	0.00879255
Aco2	-3.48081	0.00887002
Lef1	-3.56068	0.00893273
Angptl2	-3.79324	0.00898428
Nxf1	3.72868	0.00899404
Ctnnal1	-3.68066	0.00902524
Dync1i2	-3.76791	0.00903891
Ncor2	-3.82594	0.00903891
Eif6	-3.82304	0.00904131
Sh3bgrl3	3.75781	0.00904131
Epn1	-3.68766	0.00913929
Agap3	-3.49719	0.00917554
Ankrd54	-3.58118	0.00917554
Nme7	-3.34489	0.00918145
Pex11g	-3.23215	0.00919059
Tsn	-3.82818	0.0092157
Pcbp4	-3.75558	0.0092448
Nup85	-3.66624	0.00928335
Zfp771	3.70724	0.00928335
Tnk1	-3.696	0.00935229
Lars	-3.7803	0.00935659
Mrps23	3.33554	0.00950472
Atp6v1e1	-3.52516	0.00952574
Thap4	-3.05014	0.00965568
Vps35	-3.78539	0.00965568
Ece2	3.58617	0.00971308
Fggy	-3.62981	0.009773
Farsb	-3.80755	0.00978546
Isyna1	-3.81275	0.00978546
Sh3glb2	-3.6816	0.00978546
Ckap4	3.75361	0.00991474
Ap1ar	-3.74401	0.00999825
Fn1	-3.78881	0.0100347
Psmd14	-3.76678	0.0100347
Cdca8	-2.98074	0.0100728
Sh3gl2	-3.72546	0.0100728
Krt8	-0.732309	0.0100834
Shq1	3.43112	0.0101254
Slit3	1.58008	0.0101415
Bcl11b	-3.7504	0.0102059
Polr2h	3.35345	0.0102722
Gstm1	-3.78749	0.0103065
Map1lc3a	-3.58078	0.0103065
Mark3	-3.79498	0.0103065
Fam83d	3.41114	0.0103538
Gnai1	-3.69868	0.0105011
Prim1	-3.75451	0.0105299
Tsg101	-3.62747	0.0105454
Prr22	-0.738928	0.0105455
Anapc15	3.38783	0.0106105
Pitpnb	-3.7811	0.0107042
Eef1b2	-3.78087	0.0107421
Nav2	-3.74919	0.0109833
Hdac2	-3.66272	0.011005
Rhot1	-3.62598	0.011005
Caprin1	-3.76178	0.0110145
Fut9	NA	0.0110937
Otor	NA	0.0110937
Suv39h2	-3.76468	0.0112209
Nudt16	3.55053	0.0112459
Serpine2	-3.74655	0.0112486
Wipi1	-3.75411	0.0112539
Fto	-3.73489	0.0112735
Hist1h1a	-3.52675	0.0112877
Agl	-3.69149	0.0112987
Ccdc71	3.5232	0.0113474
Yy1	-3.64809	0.0114038
Nsg1	-3.75607	0.0114131
Pcna	-3.58006	0.0114131
Poldip2	-3.70173	0.0115634
Timeless	-2.44632	0.0115634
Tgif1	3.74121	0.0115697
Snx3	-3.7223	0.011699
Nmral1	-3.73515	0.0117376
Aldh16a1	-3.59384	0.011749
Rcan1	-2.84637	0.011749
Hnrnpdl	-3.62545	0.0117826
Frg1	-3.64856	0.0118137
Wbp1	-3.29953	0.0118406
Cdc34	3.73364	0.0118639
Arl2bp	-3.74893	0.01188
Msh2	-3.4824	0.0119414
1700048O20Rik	-3.59812	0.011957
Glyr1	-3.69306	0.011957
Rgs12	-3.66495	0.011957
Igfbp2	-1.03852	0.0121415
Aagab	-2.94489	0.0123576
Eif3l	-3.67277	0.0123576
Ndufb6	-2.63955	0.0123576
Ndufa2	3.58837	0.0124209
Atg3	-3.69504	0.0124709
Kif5b	-3.726	0.0124815
Plgrkt	-3.40139	0.0124815
Zfp938	-3.67342	0.0125152
Cxcl1	-3.37465	0.0126474
Polr1a	-1.44749	0.012657
Pttg1ip	-3.61823	0.012657
Nampt	-3.37816	0.0127006
Mrps2	3.66959	0.0127229
Zfp324	-3.60182	0.0127311
Swt1	-3.72051	0.0127317
Anxa6	-3.69528	0.012843
Tctex1d2	-3.70943	0.012843
Snx4	-3.71172	0.0130708
Srrt	-3.68925	0.0130708
Phf14	-3.55802	0.0132071
Asb8	2.80984	0.0132882
Lig1	-3.66064	0.0134488
Map3k1	3.26198	0.0134559
Nfatc1	-3.70153	0.0134639
Fnta	-3.67123	0.0135514
Pacsin2	-3.60703	0.0136442
Frem2	-3.60105	0.0136848
Rps13	-3.69582	0.0138303
Sf1	-3.3693	0.0138303
Tor3a	-3.51842	0.0138323
Cenph	-3.69418	0.0138621
Atic	-3.50048	0.0139035
Dctn2	-3.64719	0.0139824
Cenpl	3.66802	0.0140276
Topors	3.6803	0.0140997
Brms1l	-3.36268	0.0141105
Ppp2r5d	-3.68431	0.0141105
Prkcdbp	3.67592	0.0141296
Smg8	3.62941	0.014204
Siva1	-3.67988	0.0142191
Ell2	-3.41766	0.0142509
Pin1	-3.67891	0.0143371
Adam9	-3.55687	0.0144315
Tmem50a	-3.6683	0.0144488
Cox5b	-3.67145	0.014459
Xbp1	-2.57384	0.014459
Cfdp1	-3.34506	0.0144641
Acot10	NA	0.0145467
Ydjc	3.64088	0.0145542
Tmem261	3.53428	0.0146061
Vapa	-3.55379	0.0146061
Mpc2	-3.43115	0.0146604
N4bp2l2	3.66929	0.0146604
Faf1	-3.66092	0.0146668
Zfp821	-3.62936	0.0146979
Rad23a	-3.58444	0.0147013
Slc7a5	-3.55977	0.0148203
Ddr1	-3.30803	0.0148239
Atg5	-2.38843	0.0148551
Blzf1	-3.28603	0.014899
Orc6	-3.55956	0.0149488
Utp11l	-3.63144	0.0150111
Rogdi	-2.76673	0.0150283
Gmcl1	-3.48974	0.0150576
Sergef	2.06288	0.0150576
Glce	3.12212	0.0150727
D10Wsu102e	-3.25783	0.0150968
Myl12a	-3.66023	0.0150968
Rcc2	-3.61379	0.0150968
Gjb6	3.49055	0.0151463
Gar1	3.64084	0.0152384
Ifitm1	3.58619	0.0153501
Csta1	-3.46062	0.0153738
Ech1	-3.59005	0.0153981
Wdr53	3.54013	0.0153981
Lypla1	-3.60313	0.0154894
Fam208a	3.41006	0.0155361
Atp5j	-3.42687	0.0156627
Krtcap3	3.62786	0.0156627
Tonsl	-3.63606	0.0156627
Efcab1	-3.63166	0.0156957
Ik	-3.47132	0.015715
Dpf2	-2.71199	0.0157434
Abcb8	-3.62712	0.0158099
Rcor2	-3.63723	0.0158553
Msi2	-3.64141	0.0159134
Slbp	-3.52467	0.0159134
Ola1	-3.64074	0.0160679
Serpinb5	-3.19504	0.0161233
Sass6	-3.39547	0.0162116
Npc2	-3.36945	0.0162185
Mthfd2	-3.61644	0.0162458
Tgfb3	-3.39252	0.0162458
Proca1	3.49941	0.0162762
Sephs1	3.33358	0.0162902
Hnrnpul1	-3.57972	0.0163133
Mrpl52	3.62575	0.016442
Sh3glb1	-3.50571	0.0165892
Zfand5	-3.59253	0.0166032
Clspn	-3.39277	0.0166367
Cnot1	-3.51446	0.0167803
Coro2a	-3.42073	0.0169012
Arhgdia	-3.19521	0.017035
Nelfa	-3.60585	0.0170584
Rab40c	-3.58197	0.017078
U2af2	-3.18112	0.017078
Lta4h	-3.56287	0.0170899
Fignl1	2.70975	0.0171599
Chmp1a	-3.6022	0.0171816
Yrdc	-3.56725	0.0172412
Ndufs6	-3.5336	0.0172533
Agtr1a	-3.11759	0.0172788
Smco4	3.54155	0.0173539
Fbn2	-3.57804	0.0174028
Trim47	3.59469	0.0174028
Abcd3	-3.60598	0.0175191
Vwa2	-3.37638	0.0176148
Gps1	-3.55735	0.0176798
Hbp1	-3.28683	0.017745
Manbal	-3.60168	0.017745
Chchd4	3.38214	0.0178153
Ebna1bp2	-3.25781	0.0178906
Man2c1	-3.3494	0.0178906
Hsdl2	-3.4965	0.0181928
Sucla2	-3.5881	0.0181939
Copz2	-3.56337	0.0182331
Pygl	-3.34182	0.0182331
Sgk3	-3.38612	0.0182651
Trappc4	-2.73105	0.0183156
Tnfaip1	-3.29676	0.0183583
Nedd1	-3.57792	0.0183889
Cdc16	-3.58447	0.0184751
Acot8	-2.76451	0.0186142
U2surp	-3.40367	0.0186973
Cpsf3	-3.58581	0.0187065
Sdhc	-3.27836	0.0187117
Lmo4	-3.42869	0.0187136
Fgd4	-3.52741	0.0188121
Isoc2b	-3.48926	0.0188162
Cxxc1	-3.18615	0.0193492
Lnx1	NA	0.0193747
Med12l	NA	0.0193747
Serpinf1	NA	0.0193747
Stx12	-3.57672	0.0193747
Hr	3.48946	0.01942
Tubg1	-3.51597	0.0194859
Adipor1	-3.51493	0.0195488
Trappc6b	-3.49703	0.0195488
Dvl2	-3.3904	0.0195589
Acadl	-3.56019	0.0195781
Thoc7	-3.52196	0.0197736
Fbxo44	-3.46009	0.0200495
Drg1	-3.45881	0.0201136
Gsta4	-3.1434	0.0201136
Sav1	-2.79254	0.0201642
Slc39a8	-3.49901	0.020222
Chic2	-3.50984	0.0204485
Rbbp8	-3.32418	0.0204705
Paip2	-3.49764	0.0205022
Sgcb	-3.31196	0.0205501
Ppp2r3d	-3.48619	0.0205738
Sbno1	-3.55087	0.0207234
1110046J04Rik	3.46654	0.020749
Mad1l1	-3.53324	0.0208089
Samd4	-3.2941	0.0208089
Dnase2a	-3.42745	0.02103
Trim59	3.38471	0.0211374
Krt1	-1.08217	0.0213859
Rmdn1	-3.50598	0.0216491
Kcmf1	-2.4804	0.0216534
Fhit	-3.33238	0.0220259
Bcl10	2.87357	0.0220474
Srsf9	-3.49154	0.0220474
Rbm42	-3.45687	0.0221863
Ssbp1	-3.48815	0.0221863
Trip6	-3.4095	0.0222671
Por	-3.48127	0.022291
Ndufb4	-3.44995	0.0223242
Pcbp3	-3.34686	0.0223896
Irs2	3.15943	0.0224401
Fkbp9	-3.37139	0.0228992
Ttc19	-3.4128	0.0228992
Cct3	-3.48262	0.0229361
Tspan13	-3.46255	0.0229361
Elp4	-3.24399	0.0229789
Ccs	-3.51669	0.022986
Timm21	3.00659	0.0230015
Prdx1	-3.43067	0.0230017
Ccdc91	-3.5106	0.0230277
Pgs1	-3.09428	0.0231162
Mccc1	-3.50541	0.0232131
Cystm1	-2.98628	0.0234377
Xrcc1	-3.50611	0.0235198
Pcdh20	-3.10507	0.0235601
Cst3	-3.30676	0.0237392
Naa30	3.35102	0.0237392
Kif26a	2.85347	0.0237518
Ubr4	-3.28511	0.0237518
Mmp14	0.947225	0.0238039
Crlf1	-3.26424	0.0239176
Hoxa1	3.2422	0.0240293
Asns	-3.17688	0.0242755
Kdf1	3.42526	0.0242755
Ndufc2	-3.3839	0.0243303
Wdr86	2.21357	0.0244357
Epn3	3.36053	0.02475
Sptlc3	-2.73387	0.0248292
Ulk1	-3.46768	0.0249532
Hif1an	-3.25974	0.0249974
Bbs12	-3.4136	0.0251586
Cops5	-3.35639	0.0252294
Slc40a1	-2.82339	0.0252294
Cyth2	-3.4399	0.0252764
Taf8	-3.35843	0.0252764
Capg	-3.31938	0.0253635
BC055324	-3.46264	0.0254331
Fam49b	-2.98973	0.0254331
Peg3	-0.529939	0.0254331
Map3k12	-3.41782	0.0256726
Btbd19	-3.37477	0.0257434
Eif3b	-3.37664	0.0258263
Ift74	-3.45787	0.0258589
Ralgps2	-3.42302	0.0258589
Rps3	-3.47241	0.0258589
Luzp1	3.32475	0.0261513
Surf2	-3.42386	0.0261513
Tpgs2	-3.26174	0.0261513
Mettl5	-3.3566	0.0262441
Cuedc2	-3.29682	0.0262749
Ints10	-2.34129	0.0263002
Brd2	-3.2082	0.0263413
Atp5d	-3.40933	0.0264183
Rnps1	-3.21132	0.0264646
Hnrnpll	-3.38384	0.0264775
Ap2a1	-3.44902	0.0266313
Npr2	NA	0.0266313
Mif	-3.31658	0.0267112
Eml3	-3.01718	0.0268133
H19	-3.4254	0.0268133
Nktr	-3.15907	0.0268133
Fam117a	-3.12393	0.0269081
Fam76a	-3.44571	0.0269173
Nek7	-3.32702	0.0270504
Dmkn	-3.40349	0.0270697
Tnc	-0.330741	0.0271001
Nop56	-0.483824	0.0274058
Ska2	-2.92796	0.0275115
Kdelc1	-2.15419	0.0275141
Zfp512	-3.24902	0.0275567
Fam132a	-3.01094	0.02756
Rps19bp1	3.39243	0.0278333
Dapk3	-3.42272	0.0279451
Gabarapl2	-3.40467	0.0280361
Dynll2	1.89697	0.0280362
Rras2	-3.43477	0.0280625
Cpsf3l	-3.44165	0.0280902
Gemin6	3.2158	0.0280902
Creld2	-3.25608	0.0282889
Cd59a	-3.4142	0.0283701
Proser2	3.14454	0.0285332
Mtmr6	-2.54843	0.0285649
3110009E18Rik	-3.41423	0.0286918
Rab23	-3.23114	0.0287643
Ahcyl1	-2.1149	0.0288926
Ndufa13	-2.91976	0.0290463
Ctu2	-3.0993	0.0290675
Chchd3	-3.42449	0.0294723
Kcnq1ot1	3.01616	0.0296203
Stard7	-3.00218	0.0296275
Exosc5	-3.37601	0.0296329
Rqcd1	-3.39055	0.0296589
1700123O20Rik	3.4153	0.0296724
Wnt4	-3.02847	0.0296724
Zfp85	-3.33974	0.0298107
Atp6v1b2	-3.2003	0.0298167
Kif6	-3.05179	0.0298167
Rps18	-3.41736	0.0298635
Znhit3	3.233	0.0300028
Slc38a2	-3.40232	0.0300718
Zc3h18	-1.83125	0.0303875
Crot	-3.1086	0.0304336
Hspa9	-3.36339	0.0304377
Aplp1	-3.03916	0.0304415
Cenpf	1.83665	0.0304415
Rock1	-3.40009	0.0304415
Ap1s1	-3.05668	0.0306281
Gpaa1	-3.12414	0.0307937
Rpl37	3.40536	0.030858
Aen	3.38075	0.0312639
Zc3h7a	-3.29224	0.0312639
Abce1	-3.38967	0.0313452
Ptprz1	-3.01825	0.0313452
Scnm1	-3.25992	0.0313452
Hmg20b	-3.10845	0.0315457
Noc4l	-2.83919	0.0315651
Cc2d1b	-3.31954	0.0318216
Rfc4	-3.29985	0.0318376
Pygb	-3.38882	0.0320457
Prkag1	-3.20085	0.0321766
Arfrp1	-2.88141	0.0321773
Got2	-2.94145	0.0321833
Abcb10	-3.3289	0.0323908
Zfp157	-3.15193	0.0324433
Smn1	-3.38793	0.0324584
Clp1	3.23572	0.0325309
Tmem109	-2.80872	0.0325763
Mcee	3.37666	0.0326677
Sf3b3	-2.97331	0.0326677
Pfn1	-3.34402	0.0326906
Parn	-3.2428	0.0326959
Spop	-3.37118	0.0326959
Narf	-2.89678	0.0327123
Dgcr2	-3.17125	0.0329922
Iars	-3.19241	0.0329922
Gmnn	-3.15304	0.0330573
Smdt1	-3.11468	0.0333655
Idh2	-2.58629	0.0339465
Rraga	3.35759	0.0340456
Atg12	-3.36865	0.0340731
Ptpre	-1.11085	0.0340731
Lamb1	-3.3528	0.0343139
Anks1b	NA	0.0343323
Cbr1	3.21148	0.0343323
Ccl21a	NA	0.0343323
Coro1c	-3.26142	0.0343323
Efr3b	NA	0.0343323
Gm11837	NA	0.0343323
Krt36	NA	0.0343323
Pax3	NA	0.0343323
Phf11d	NA	0.0343323
Piwil2	NA	0.0343323
Gtpbp1	-2.04665	0.0344242
Mcc	-1.73834	0.0344905
Cdca4	3.23994	0.034625
4930451G09Rik	-0.468146	0.0348431
Ccdc127	2.9214	0.0348431
Dlx2	-0.468146	0.0348431
Rab26os	3.22418	0.0350318
Fam60a	-3.2947	0.0352411
Lingo1	-3.32815	0.0355219
Adora2b	3.24001	0.0355711
Exosc8	-3.34189	0.035708
Pdgfa	-3.07914	0.035708
Spink8	-3.19039	0.035708
Ndufc1	-2.65581	0.0358541
Zbed4	3.18563	0.0362133
Tulp3	-3.3414	0.0362555
Agrp	2.13698	0.0362942
Agfg1	-3.29171	0.0363084
Dexi	-3.08685	0.0364005
Hist1h2bj	-3.22467	0.0364897
Ubl7	-3.33899	0.0364897
1810043G02Rik	-3.06663	0.0365876
Efna4	3.20801	0.0365876
Pomp	-2.88019	0.0365876
Trmt5	3.27283	0.0365876
Snrpa1	-3.33358	0.0367465
Ncor1	-3.1587	0.0368314
Sfrp2	-1.97971	0.0369309
Slc38a1	-3.02907	0.0370443
Toporsos	3.31353	0.0372956
Rfc3	-3.25402	0.0373726
Rnaseh2a	-3.2973	0.0373726
Tle2	3.23038	0.0373726
0610010K14Rik	3.15297	0.0373752
Ivns1abp	-3.18731	0.0373752
Tmeff1	-1.7657	0.0376314
Pop5	2.81902	0.037657
Eif3i	-3.32107	0.0377096
Farp1	-3.27054	0.0377988
Syf2	-3.15507	0.037998
Net1	-3.2728	0.0380087
Ecd	-3.2683	0.0380807
Efcab2	-3.25754	0.0380807
Mrpl18	-3.02364	0.0380807
Cycs	-3.32093	0.038103
Rnf114	-3.1842	0.0382268
Rap1a	-2.14068	0.038436
Nmd3	-3.21982	0.0385823
Mtmr9	-3.25504	0.03881
Gemin2	-3.25623	0.0388249
Tceb2	-3.27396	0.0389269
Dnph1	-3.20847	0.0389578
Gnai3	-3.09274	0.0390394
Vimp	-3.17233	0.0391396
Atp5g3	-3.15277	0.0394701
Auh	-3.28731	0.0394701
Hdlbp	-3.31091	0.0394701
Rpl13a	-3.30874	0.0396222
Babam1	-2.97669	0.0396562
Hilpda	-2.94355	0.0397529
Snap23	-3.30765	0.039818
Leprotl1	3.28779	0.0399224
Rbm25	-3.26386	0.0401309
Mbtd1	-3.22956	0.0401691
Pde7a	-2.57686	0.0402166
Canx	-3.30302	0.0403633
Hcfc1r1	-1.92786	0.0404575
Vangl1	3.29059	0.0405375
Zfp704	-3.23682	0.0405785
Arl2	2.9098	0.0407462
Ndufs3	-3.29586	0.0410117
Krt27	-3.15195	0.0410342
Rcor1	-2.96215	0.0410342
Snrpd1	-2.47773	0.0410342
Vopp1	-3.28809	0.0410906
Cib2	-3.26518	0.0413818
Psmb1	-3.21808	0.0416777
Parp2	-3.28109	0.0417006
Asl	-3.24313	0.0419623
Gss	-2.87311	0.0419623
Psmb5	-3.15242	0.0421313
Pdcd2	-3.19202	0.0421434
Ttll10	2.64693	0.0422318
E130311K13Rik	2.51117	0.0424094
Racgap1	-2.56664	0.0424297
Pa2g4	-3.27084	0.0425295
Hmg20a	-3.04512	0.0427025
Vps52	-2.94674	0.0427025
Mapk7	3.04092	0.0430619
Ruvbl2	-3.26953	0.0430619
Wnk1	-3.24633	0.0430875
Pbx3	-3.00239	0.0432064
Angptl6	-3.24486	0.0432262
Sik3	-3.01364	0.0432262
Luc7l3	-3.23744	0.0433519
Rundc1	-3.20906	0.0435906
Grb14	-2.74974	0.0435986
Tti1	1.96572	0.0436106
Ufsp1	3.16923	0.0436289
Pycrl	-3.17811	0.043684
Tram1	-2.44782	0.0436851
Zc3h13	2.72022	0.0437441
Cldn10	-3.08131	0.0442846
Eci2	-3.23959	0.0446029
Foxn3	2.62214	0.0447006
Ift20	-3.24248	0.0448494
Shisa5	-3.11555	0.0450691
Rbm7	3.13818	0.0451536
Parp1	-3.08263	0.045423
Adcy3	3.21725	0.045526
Arhgef26	-2.46644	0.045526
Tusc3	-3.00141	0.045526
Hnrnpa3	-3.02992	0.0455803
Vps18	3.15197	0.0456663
Fen1	2.68487	0.0457483
Szrd1	-3.01149	0.045761
B230118H07Rik	-3.07616	0.0458695
Gatad2b	-3.24382	0.0458695
Ncbp1	-3.19504	0.0458823
Ucn2	-3.17439	0.0458823
A830018L16Rik	-2.83613	0.0459311
Bnipl	-3.18717	0.0459311
Aldoa	-2.66438	0.0461277
Ncaph2	-3.08459	0.0461277
Smoc2	-3.22376	0.0461277
Pithd1	-3.19782	0.0462152
Sgol1	2.98771	0.0462152
Ndufv1	-3.2359	0.0465621
Ppia	-3.24333	0.0465621
Tardbp	-3.20807	0.0465621
Tmem160	-3.05677	0.0465621
Hist1h2bc	-2.64936	0.0466179
Lamc2	-3.24004	0.0466785
Mrpl9	-3.19892	0.0466785
Zkscan17	3.17927	0.0468012
Becn1	-3.05573	0.0468663
Exoc1	-3.19771	0.0468663
Psmd2	-3.17584	0.0469131
Iqgap1	-1.84473	0.046987
Gsk3b	-1.88325	0.0471946
Atp6v1d	-3.0797	0.0473267
Ckap5	3.01642	0.0473267
Papd4	-2.91867	0.0476549
Psma6	-3.22612	0.0476632
Cd24a	-2.61961	0.047753
Ddi2	-3.10238	0.0478112
Cdc25c	-3.10162	0.047813
Bcas3	-3.02718	0.0482615
1700007B14Rik	NA	0.0482799
BC030499	NA	0.0482799
Grina	-3.17435	0.0483714
Ndel1	-2.9188	0.0486755
Ostf1	-3.02694	0.0489967
Sgk1	2.2851	0.0490469
Sf3a1	-3.2074	0.0491328
Megf6	-2.37095	0.0492294
Ctsl	-2.25491	0.0494623
Ppm1l	-3.07411	0.0494623
H1fx	-3.19042	0.049648
B630005N14Rik	3.12149	0.049791
Kif22	-3.20762	0.049791
Rpa2	-3.16172	0.049791
Tpst2	3.13136	0.049791
2410016O06Rik	3.19224	0.0498784
Atp5h	-3.15921	0.0500211
Lhx2	-3.01377	0.0500211
Mybl2	-3.14609	0.0500211
Rabgap1l	-2.87938	0.0500211
Zc3h14	-3.03297	0.0500211
Acer2	3.13315	0.0501029
Mtx1	3.20551	0.0501754
Ctdsp2	-3.21074	0.0502854
Dnajc24	-3.0051	0.0505455
Tbcel	-3.07453	0.0508326
Ahcyl2	-2.98649	0.0509595
Pskh1	-2.95373	0.050993
Mrpl19	2.71863	0.0510548
Pacsin3	-2.76857	0.0511449
2310022A10Rik	2.96401	0.0515936
Cbl	3.15715	0.0517446
Gtf2ird1	-3.03078	0.0522963
Atf5	-3.11516	0.0523242
Pold2	-3.16535	0.0523242
Smad7	3.14904	0.0525636
Tmub2	-3.11879	0.052662
Efna1	-3.17543	0.0526901
Ap3s1	-3.13223	0.0527105
Cisd3	-1.12301	0.053265
Lancl1	-3.02718	0.053265
Cep192	-3.07274	0.0535843
Eri3	-3.07161	0.0535845
Ankrd11	-2.9594	0.0538265
Cdh3	-2.46357	0.0538265
Gnb1l	3.08327	0.0538265
Impa2	-3.07601	0.0542403
Wdr55	3.14976	0.0542403
Tfpi	-2.90802	0.0543553
Lypd6b	-3.18027	0.0545346
Ktn1	-3.1772	0.0546075
Ociad1	-3.15395	0.0550878
Smc3	-3.03034	0.0550951
Cdipt	-3.16909	0.0552228
Tmem97	2.86302	0.055252
Ppil2	-3.17229	0.0553093
Clu	-2.84158	0.0553905
Smpdl3a	-3.12981	0.0554527
Ppp5c	-2.81629	0.0554635
Znrd1	-2.96322	0.0554635
Hnrnpm	-3.05445	0.0555811
Plcb1	0.910443	0.0556138
Msh3	-3.16674	0.0559311
Sec13	-3.16134	0.0559311
Fryl	-3.10868	0.0559897
Cldn6	-3.06629	0.0562755
Spen	-2.75329	0.0562755
Pfn2	-3.14737	0.0563112
Pigc	3.11779	0.0563178
Cchcr1	-3.03803	0.0565101
Snrpb	-3.0882	0.0566636
Nfia	3.14929	0.0566799
Ppp1r12a	-3.03397	0.0566862
Dbr1	2.99425	0.0567683
Strbp	-3.13521	0.0567688
Riok1	-3.1614	0.0568388
Kat2a	-2.80132	0.0569006
Wbp5	-2.9825	0.0569196
Nat6	3.13883	0.0570846
Phlda2	1.88909	0.0572217
Bag5	3.06926	0.0573551
Cast	-2.83619	0.0575138
Gatsl2	2.99661	0.0575866
Impa1	-2.81907	0.0576093
Hoxb7	2.84044	0.0578739
Rpusd4	-3.04701	0.0579217
Ndc80	-2.78661	0.0579322
Zfp523	-2.79476	0.0581415
Cog4	-2.50882	0.0582609
Evl	-3.12437	0.058318
Gdpd1	-2.96606	0.058318
Polr2i	-3.15205	0.058318
Snf8	-3.13376	0.0588609
Donson	-2.92423	0.0590905
Rbx1	-2.49787	0.0590905
Thoc3	-2.69963	0.0591078
Raf1	-3.11322	0.0593019
Casp7	-3.1171	0.059349
Tmem65	-3.12094	0.0595898
Ube2t	-2.81065	0.0596056
Mtdh	-3.02652	0.0596494
Ppp1r14a	-3.09922	0.0598425
Camk2n2	NA	0.0599156
Gfra1	NA	0.0599156
Hist1h4f	NA	0.0599156
Ntm	NA	0.0599156
Tmem176a	3.1227	0.0599648
Arl8a	-3.09781	0.060033
Fopnl	-3.13201	0.0602436
Tm9sf2	-3.11279	0.0602746
Abi1	-3.13661	0.0602754
Plin3	-3.06008	0.0602882
Ppp2cb	-3.0586	0.0602882
Gli1	-2.64944	0.0605124
Fam110a	3.10678	0.0606095
Osr1	-2.48273	0.0606186
Prim2	-2.92175	0.0606186
Rpl38	3.13302	0.0606186
Nrp2	-2.5014	0.0608532
Cox16	-2.17431	0.0610117
Rrm2	-3.13018	0.0610274
Zfp524	3.09721	0.0610796
AI464131	-2.58104	0.0614771
Pik3c2a	0.239992	0.0620654
Ypel1	-2.45099	0.0621121
Ppp1r37	-2.76492	0.062657
Haus5	-2.96662	0.0626975
Stoml2	-3.04954	0.0626975
Rbm4	-3.05177	0.0629898
Tnfsf9	2.91885	0.0629898
Nrtn	2.31727	0.0630072
Srsf6	-2.92874	0.0630072
Tomm34	-3.06422	0.0630072
Saal1	-0.319186	0.0632142
Deb1	1.79158	0.0633645
Dnajb6	3.09167	0.0638254
Mkl1	3.07312	0.0638254
Fam193a	-2.68367	0.0638346
Ncald	2.65487	0.0638346
Pten	3.03051	0.0643744
Pigw	-3.05988	0.064377
Capza1	-2.87293	0.0644371
Elmo1	-2.39167	0.0644596
Cmpk2	-0.0175643	0.0645814
Kifc2	-3.02669	0.0646505
Sptlc1	-2.68411	0.0646505
Sox10	-2.35065	0.0648768
Rtkn	-2.63727	0.0648874
Mfsd5	2.84239	0.0649829
Fntb	-1.70229	0.0650149
Sgce	-0.117412	0.0651664
Unc50	-3.10287	0.0652716
Zfand2b	-3.06677	0.0662223
Cdca2	2.58363	0.0663223
Ifi27	2.27537	0.0665203
Arpc2	-3.05926	0.0665457
Brd4	-2.88657	0.0665457
Clip1	2.58462	0.0665457
Prss35	-2.85375	0.0665457
Slc35e4	-2.76709	0.0665457
Cadm4	-2.99051	0.0665636
Wdr78	-2.94334	0.0665636
Rassf7	2.85722	0.0669924
Dnajc8	-2.88297	0.0671457
Mrpl21	-2.9733	0.0671471
Wdr73	2.9865	0.0676096
Ppp3cb	-2.38892	0.0676812
Socs4	3.06246	0.0676943
Krtdap	-3.08614	0.067706
Esrra	-3.07184	0.0680277
Cat	-3.02199	0.068516
Rpl26	3.08304	0.068516
Ak7	-2.66327	0.0688176
Slc22a4	-1.52703	0.0692351
Wdr5	-2.70513	0.0693091
Fam134a	3.04614	0.0693234
Hist1h2bb	-2.87103	0.0693499
Mkrn3	-2.98932	0.0694803
Nudt13	-2.90968	0.0694803
Ier3	2.22064	0.0699439
Riok3	-3.05834	0.0699601
Grk6	-3.0527	0.0707418
Slc4a2	-3.02656	0.0707418
Brix1	-3.05069	0.0709057
Rbm22	-2.98219	0.0712255
Nufip2	3.00648	0.0714743
Mb21d2	2.44939	0.0715426
Arl1	-2.46622	0.0716165
Ddx27	-3.02487	0.0716165
Tubgcp2	-3.0623	0.0716165
Ing2	-3.02681	0.0719279
Slc16a1	-2.95014	0.072113
Trim27	3.05211	0.0730335
Itih5	2.00375	0.0730583
Add1	-2.91543	0.073086
Neurl1b	2.11543	0.073086
Fnbp4	-2.95579	0.0734265
Celf4	-0.985448	0.0737935
Lats1	2.61292	0.0741359
Parl	-3.03192	0.0742309
AI987944	3.01263	0.0744074
Pm20d2	-2.86888	0.0744164
Prune2	-2.86888	0.0744164
Trappc9	-1.9382	0.0744164
Myh9	-3.04417	0.074646
1300002E11Rik	-2.74181	0.0746654
Fyb	2.91489	0.0746654
Nol11	-2.71091	0.0746654
Dnttip1	-3.04151	0.0747681
Klhl9	2.69189	0.0747681
Mtmr11	-2.90539	0.0747681
Carm1	-2.98398	0.0750333
E2f4	-2.97646	0.0751424
Tmem5	2.32156	0.0751424
Rnf166	-2.62347	0.0753488
Pip5k1c	-2.81336	0.0753643
Vars	-3.00035	0.0757138
Stau1	-2.49799	0.0758532
Pdk1	-2.95666	0.0759097
Psmg1	-3.0411	0.0759097
Vta1	-2.88571	0.0759579
Fbxo5	2.93534	0.0761521
Fam173a	2.83068	0.0762312
Rrp36	2.50317	0.0766266
Nfu1	-2.96875	0.0767212
Phb2	-2.80607	0.0767212
Anapc4	-3.02636	0.0769227
Bivm	2.91455	0.076961
Hexb	-3.02503	0.076961
Inpp5b	-2.80286	0.076961
Tmem98	2.94755	0.076961
2700029M09Rik	-3.00508	0.077005
Gtpbp8	-3.00014	0.077005
Plk3	-2.70806	0.077005
Tmem126a	-2.76676	0.0770756
Gle1	-2.95525	0.0774433
Gtf2e2	-3.0305	0.0776542
Kcnq4	-2.77785	0.0777835
Tmem192	2.97395	0.0777835
Alkbh6	-1.63801	0.0782772
Prkaca	-2.99888	0.0783052
Ss18	-2.91637	0.0787207
Smim4	-2.6267	0.078961
Arf4	-3.00256	0.0790189
Hpgds	-2.9189	0.0790189
Cog3	-2.94971	0.079096
Lyar	-2.6665	0.079096
Abhd14b	2.99795	0.0794921
Ldlrap1	-2.93358	0.0794921
Mgll	-2.9478	0.0795131
Rnf167	-2.99629	0.0795457
Sec61a1	-2.71097	0.0796137
Slc44a2	-3.00285	0.0796137
Elof1	3.01529	0.0796198
Ppp2r5c	-2.65541	0.0796198
Efr3a	-2.5437	0.0799923
Ap4m1	-2.09822	0.0808375
Tmem2	0.271401	0.0808832
Ttl	-2.82147	0.0808832
Ccdc34	-2.5181	0.080931
Gstt3	2.9122	0.0809764
Ndufa3	2.33632	0.0812541
Agtpbp1	-1.44839	0.0812674
Clip3	-2.265	0.0812674
Fam136a	2.88325	0.0812674
Steap4	-2.78164	0.0812674
Vps33a	2.95668	0.0812674
Zfp346	-2.37327	0.0813922
Marcks	2.73081	0.0814558
Dnm2	-2.70942	0.0816706
Itgb3bp	-2.81824	0.0819855
Tmem165	-2.97831	0.082108
Hint3	-2.99077	0.0822348
Pqlc1	-2.99719	0.0822348
4930427A07Rik	-2.96103	0.082345
Lcmt1	-2.8836	0.0828973
Gm10069	2.8575	0.083046
Ndufb5	-2.97338	0.083046
Rsrc1	-2.98927	0.0833166
Tfap2a	2.80532	0.0836064
Zbtb40	-1.2582	0.0836695
Sumo1	-2.58953	0.083856
Glrx5	2.99195	0.0839776
Kcnmb4	-1.27457	0.0839776
Clasrp	-2.77951	0.0840332
Col6a3	0.800026	0.0840332
Commd2	2.96879	0.0840332
Dennd6a	-2.72813	0.0840332
Gnl2	-2.79711	0.0840332
Tsen34	-2.03393	0.0840332
Osbpl1a	-2.96685	0.0840561
Nt5dc1	-2.94772	0.0840657
Tmed3	-2.93995	0.0841024
Vps16	-2.67886	0.0845295
Ccdc106	2.30796	0.0848039
Antxr1	-1.9052	0.0850664
Gcc2	-2.5485	0.0850664
Fam160b2	-2.95744	0.0852846
Fxr2	-2.97531	0.0853266
Ppp1r2	-2.92833	0.0856684
Rmi1	2.85306	0.0858044
Atp6v1g1	-2.63609	0.085837
Gria2	-2.60236	0.0860177
Ip6k2	-2.9711	0.0860177
Parp12	-2.91646	0.0860177
Ppp2r4	-2.64126	0.0862237
Sod2	-2.33055	0.0864558
Nat2	2.93761	0.0867277
Chmp7	-2.69707	0.0868117
Hmgcs1	-2.1	0.0868117
Moxd1	-2.63171	0.0869758
Ptch2	-2.7059	0.0870258
Cdr2l	-2.69884	0.0871027
D530049I02Rik	NA	0.0871027
Foxi3	NA	0.0871027
Hs3st1	NA	0.0871027
Nrg1	NA	0.0871027
Rab19	NA	0.0871027
Tex13	NA	0.0871027
Nudt5	-2.95621	0.0873781
Fam46a	-2.88334	0.0877084
Pak6	-2.38643	0.0880725
Rars2	-2.68133	0.0882178
Ecsit	-1.88992	0.08829
Sppl3	-2.96158	0.088343
Atg4b	-2.93449	0.0885241
Ccdc8	-2.7478	0.0890538
Cyb5r1	-0.470219	0.0890538
Kctd5	-2.93536	0.0890538
Lsm14b	-2.93959	0.0891269
Celf2	-2.93427	0.0893042
Gclm	-2.81608	0.0893284
Naa38	-2.96476	0.0893541
Epm2aip1	2.37798	0.0897583
Gusb	1.94911	0.0899376
Rufy1	-2.9147	0.0900405
Erf	-2.96126	0.0901699
Dad1	-2.60411	0.0909688
Dym	-1.72385	0.0909688
Ehd3	-2.69692	0.091399
Fam134c	-1.58305	0.091399
Hsbp1	-2.94248	0.0915042
Fbp1	-2.7616	0.0921634
Wwtr1	-2.85588	0.0921986
Cox6a1	2.92932	0.0926721
Polr2g	-2.94685	0.0926721
Spo11	-2.66254	0.0926721
Srsf4	-2.89574	0.0926721
Zfp787	2.91165	0.0927262
Mrpl20	2.89656	0.0931932
Pdhb	-2.7394	0.0931932
Ikbkb	-2.30109	0.0933003
Nfx1	-2.93405	0.0935754
Cthrc1	-1.64339	0.0935936
Myo1c	-2.92951	0.0937913
Fam57a	2.40808	0.0939433
Pak2	-2.13446	0.0941247
Ercc1	-2.91441	0.0943735
Brd3	-2.89824	0.0944145
Eef2k	-2.87579	0.0944145
Arhgef5	2.5958	0.0947882
Tpm1	-2.70935	0.0949386
H2-Ab1	-2.83597	0.0949696
9130008F23Rik	-2.78391	0.0953028
Tbc1d8	-2.14981	0.095497
Cnih4	-2.9275	0.0960176
Krt10	-2.18587	0.0960176
Zbtb44	-1.88857	0.0960176
Dis3l	-2.74335	0.0960529
Bub1b	-2.49888	0.0961004
Cpm	2.82722	0.096506
Spats2l	-2.67969	0.096506
Tmem33	-2.86462	0.0965661
Matk	2.71919	0.0966157
Ubxn6	-2.92076	0.0967822
Iqce	-2.79902	0.0970119
Bok	-2.04567	0.0971138
Ly96	-2.8807	0.0971138
Trp53i13	2.88743	0.0974592
Dzip1	-2.88474	0.0975177
Ensa	-1.87442	0.0976935
Elovl6	-0.422794	0.097979
Clptm1	-2.54466	0.0981661
Mapk8	-2.85872	0.0983773
Zfp820	-2.82886	0.0983773
Cd109	-2.91495	0.0984028
Klf9	1.99044	0.0984694
Sra1	2.48465	0.0990011
Gtf3a	-2.91859	0.0991466
Lrrc40	-2.52943	0.0991831
Dtd1	-2.90767	0.0993393
Igf2bp1	2.44755	0.0994933
Mrpl22	-2.34497	0.0994933
Gltp	-2.89042	0.0998418
Cdkn2aip	-2.89548	0.100391
Fcho1	-2.72105	0.100391
Cav1	-2.71257	0.100445
Homer3	-2.15282	0.100445
Mtus2	-2.21476	0.100445
Mia	-2.69422	0.10087
Swi5	-2.85961	0.10087
Akt1s1	-2.89782	0.100984
Rfc5	-2.90118	0.100992
Rnf6	-2.79974	0.101276
Pdpk1	-2.86725	0.101472
Bub1	-2.31677	0.101703
Tbc1d22a	-2.14159	0.102063
Eif2b5	-2.75924	0.102171
Gnl1	-2.90009	0.102171
Cst6	-2.63412	0.102364
Rorc	2.76027	0.103314
Bpifc	NA	0.103605
Cacna1b	NA	0.103605
Ccdc116	NA	0.103605
Ccdc64b	NA	0.103605
Cnot3	-1.18084	0.103605
Dhrs1	-2.87806	0.103605
Fam20a	NA	0.103605
Ghr	-2.79909	0.103605
Gprin3	NA	0.103605
Gstm5	-2.89076	0.103605
Maneal	NA	0.103605
Mrpl50	2.31825	0.103605
Msantd1	NA	0.103605
Nae1	-2.87601	0.103605
Npy	NA	0.103605
Ppp2ca	-2.87497	0.103605
Rheb	-1.95101	0.103605
Slc45a2	NA	0.103605
Wdr12	-2.88905	0.103605
Wnt10a	1.58473	0.103605
Yeats2	-1.4193	0.103605
Mcrs1	-2.84181	0.10363
Rasip1	-2.22567	0.10365
Tmbim6	-2.7709	0.104105
Nsmce2	-2.85054	0.104326
Tead1	-2.64014	0.104326
Col9a2	-2.5005	0.104597
Nhlrc3	-2.77799	0.104597
Cdca7l	-2.71936	0.104705
Epha4	-2.84689	0.104863
Elp6	-2.8628	0.1049
Brd7	-2.85507	0.105122
Rbm48	2.8415	0.105122
Samm50	-2.79865	0.105122
Snx27	-2.88412	0.105122
Chmp5	-2.86152	0.10523
Bloc1s2	-2.26203	0.105343
Dnajc2	-2.88608	0.105343
Mettl23	2.87949	0.105343
Nrbp1	-2.86492	0.105343
Vamp4	-2.59349	0.105343
Ipo5	-2.5213	0.105477
Sar1b	-2.73078	0.105493
Hmga2	-2.66922	0.106904
Cep104	2.80039	0.107719
Phlpp2	-2.64501	0.107719
Akap8l	-2.82863	0.108774
Scarb2	-2.49593	0.108793
Cd63	-2.74375	0.109118
Qsox1	-2.73557	0.109118
Nudcd1	-2.83322	0.109216
Shf	-2.80196	0.109386
Cwc15	-2.74317	0.109708
Myo19	-1.2817	0.10974
Phtf1os	-2.75293	0.10974
Col1a2	-1.28999	0.109931
Elp2	-2.8651	0.109931
Snx15	-2.77414	0.109931
Cnot11	2.26299	0.110061
Atxn1	0.745849	0.110479
Capn7	-1.55175	0.11063
Prmt5	-2.58099	0.11063
Grwd1	2.65056	0.110764
Cebpb	2.62455	0.110791
Fzd1	-2.49353	0.110791
Foxo6	-2.79153	0.110848
Fam69a	2.62796	0.11138
Sertad3	2.74565	0.111653
Tmed4	-2.8593	0.111917
Ch25h	2.58455	0.112278
Psmd3	-2.8481	0.112278
2210016F16Rik	2.82832	0.112452
Mkln1	-2.8475	0.112579
Zfp148	-0.910618	0.112684
Ddrgk1	-2.63584	0.112831
Ext2	2.66234	0.113022
Etv5	-2.76895	0.11308
Pdk2	-2.77071	0.113121
Clk3	-2.42921	0.113151
Zfp710	-2.12557	0.113159
Dtx3l	2.70187	0.11321
Tmem181a	-2.38512	0.113227
Zdhhc20	-2.67797	0.113227
Exosc10	-2.16674	0.113257
Sbf2	-2.83999	0.113257
Atp10b	-2.54827	0.113762
Fblim1	-2.24205	0.113762
Skint4	-2.54827	0.113762
Tcf20	2.6173	0.114008
Rfc2	-2.81095	0.114155
Icam1	-2.75884	0.114268
[truncated: 10,552 more rows]
