# Supplementary material for: m6A RNA methylation impacts fate choices during skin morphogenesis
Source: eLife. 2020 Aug 26;9:e56980. doi: 10.7554/eLife.56980 (PMC7535931; doi:10.7554/eLife.56980)
Supplement: Supplementary file 4. [file elife-56980-supp4.xlsx]

## Sheet: m6A parameters
Gene ID	Full-length m6A SN-uTPM	5' UTR m6A SN-uTPM	CDS m6A SN-uTPM	3' UTR m6A SN-uTPM	Full-length m6A SN-uTPM per nt	5' UTR m6A SN-uTPM per nt	CDS m6A SN-uTPM per nt	3' UTR m6A SN-uTPM per nt	Full-length m6A site #	5' UTR m6A site #	CDS m6A site #	3' UTR m6A site #	Full-length m6A site # per nt	5' UTR m6A site # per nt	CDS m6A site # per nt	3' UTR m6A site # per nt
0610007P14Rik	2.02632	NA	1.57017	0.456149	1.70998	NA	3.71199	0.692184	3	NA	2	1	2.53165	NA	4.72813	1.51745
0610009B22Rik	15.0595	NA	10.4966	4.56286	18.9427	NA	24.8147	17.4155	7	NA	6	1	8.80503	NA	14.1844	3.81679
0610009O20Rik	14.387	NA	1.14678	13.2402	5.9846	NA	0.748061	17.6301	9	NA	2	7	3.74376	NA	1.30463	9.32091
0610010K14Rik	8.00358	NA	0.614955	7.38862	8.76624	NA	1.14517	27.7768	5	NA	1	4	5.47645	NA	1.8622	15.0376
0610012G03Rik	12.9919	NA	12.9919	NA	Inf	NA	Inf	NA	8	NA	8	NA	Inf	NA	Inf	NA
0610030E20Rik	33.331	3.33868	2.323	27.6693	7.19271	36.29	4.63673	6.84715	14	1	2	11	3.02115	10.8696	3.99202	2.7221
0610031J06Rik	14.8338	NA	NA	14.8338	9.65114	NA	NA	56.4023	3	NA	NA	3	1.95185	NA	NA	11.4068
0610037L13Rik	56.1271	NA	2.59778	53.5293	36.1877	NA	4.39556	62.6807	7	NA	2	5	4.51322	NA	3.38409	5.8548
0610040B10Rik	7.97126	NA	7.97126	NA	Inf	NA	Inf	NA	1	NA	1	NA	Inf	NA	Inf	NA
0610040F04Rik	1.08816	1.08816	NA	NA	Inf	Inf	NA	NA	2	2	NA	NA	Inf	Inf	NA	NA
1110004E09Rik	0.774447	NA	0.774447	NA	0.665904	NA	0.887109	NA	2	NA	2	NA	1.71969	NA	2.29095	NA
1110004F10Rik	3.21778	NA	0.557458	2.66032	2.29841	NA	1.02098	3.45048	3	NA	1	2	2.14286	NA	1.8315	2.59403
1110007C09Rik	1.19511	NA	NA	1.19511	1.48645	NA	NA	7.07165	1	NA	NA	1	1.24378	NA	NA	5.91716
1110008F13Rik	19.3324	0.624486	NA	18.7079	18.4118	3.43124	NA	39.138	13	1	1	11	12.381	5.49451	2.5641	23.0126
1110008L16Rik	87.0054	72.044	14.9614	NA	27.9132	56.683	8.52499	NA	18	9	9	NA	5.77478	7.08104	5.12821	NA
1110012L19Rik	11.8056	NA	7.99994	3.80563	11.1689	NA	16.8775	11.7458	4	NA	2	2	3.7843	NA	4.21941	6.17284
1110034G24Rik	12.3813	NA	NA	12.3813	8.41691	NA	NA	30.9532	1	NA	1	NA	0.67981	NA	1.61031	NA
1110037F02Rik	121.932	NA	108.576	13.3566	17.1374	NA	19.4371	9.2497	47	NA	42	5	6.60576	NA	7.5188	3.4626
1110038B12Rik	3.97932	NA	3.97932	NA	Inf	NA	Inf	NA	4	NA	4	NA	Inf	NA	Inf	NA
1110038F14Rik	3.94098	NA	NA	3.94098	3.61226	NA	NA	11.4897	1	NA	NA	1	0.91659	NA	NA	2.91545
1110051M20Rik	5.20562	NA	1.35593	3.84969	2.63043	NA	1.36138	4.03109	3	NA	1	2	1.51592	NA	1.00402	2.09424
1110054M08Rik	8.98356	NA	8.98356	NA	Inf	NA	Inf	NA	1	NA	1	NA	Inf	NA	Inf	NA
1110057K04Rik	61.4065	NA	1.90563	59.5009	19.9242	NA	2.31266	27.5722	18	NA	2	16	5.84036	NA	2.42718	7.41427
1110058L19Rik	1.72431	NA	NA	1.72431	2.58517	NA	NA	5.52663	1	NA	NA	1	1.49925	NA	NA	3.20513
1110059E24Rik	6.46888	NA	4.116	2.35288	4.53002	NA	8.79487	2.68287	3	NA	2	1	2.10084	NA	4.2735	1.14025
1110059G10Rik	15.3071	NA	5.36924	9.93786	4.55433	NA	11.4727	3.54291	6	NA	3	3	1.78518	NA	6.41026	1.06952
1190002N15Rik	85.5579	NA	55.728	29.8299	21.6602	NA	43.0997	12.1705	31	NA	17	14	7.8481	NA	13.1477	5.71195
1200014J11Rik	14.6693	NA	4.80422	9.86506	2.33439	NA	2.59969	2.24053	10	NA	5	5	1.59134	NA	2.70563	1.13559
1300002E11Rik	12.721	NA	12.721	NA	Inf	NA	Inf	NA	4	NA	4	NA	Inf	NA	Inf	NA
1500011B03Rik	25.6878	NA	25.6878	NA	Inf	NA	Inf	NA	4	NA	4	NA	Inf	NA	Inf	NA
1500011K16Rik	2.64161	NA	2.64161	NA	Inf	NA	Inf	NA	3	NA	3	NA	Inf	NA	Inf	NA
1500012F01Rik	1.42509	0.462735	0.962356	NA	1.93102	0.954092	4.00982	NA	3	1	2	NA	4.06504	2.06186	8.33333	NA
1500015A07Rik	1.59418	NA	1.59418	NA	Inf	NA	Inf	NA	1	NA	1	NA	Inf	NA	Inf	NA
1600002H07Rik	11.7852	NA	5.61139	6.17382	5.4994	NA	4.28023	7.68844	3	NA	2	1	1.39991	NA	1.52555	1.24533
1600012H06Rik	71.6141	NA	58.6244	12.9897	25.9848	NA	105.062	7.34295	15	NA	8	7	5.44267	NA	14.3369	3.95704
1600014C10Rik	3.86019	NA	3.02766	0.832534	1.1189	NA	7.10719	0.320822	2	NA	1	1	0.57971	NA	2.34742	0.385356
1700001C19Rik	2.74771	2.74771	NA	NA	1.52566	8.4545	NA	NA	2	2	NA	NA	1.11049	6.15385	NA	NA
1700007G11Rik	3.53084	NA	3.53084	NA	4.10086	NA	5.02969	NA	2	NA	2	NA	2.32288	NA	2.849	NA
1700007K13Rik	5.44624	NA	5.44624	NA	6.77393	NA	10.806	NA	1	NA	1	NA	1.24378	NA	1.98413	NA
1700008J07Rik	10.9288	NA	10.9288	NA	Inf	NA	Inf	NA	1	NA	1	NA	Inf	NA	Inf	NA
1700009J07Rik	3.61181	NA	3.61181	NA	Inf	NA	Inf	NA	1	NA	1	NA	Inf	NA	Inf	NA
1700017B05Rik	194.518	2.11704	103.711	88.6897	39.424	9.53623	33.7601	54.0791	46	1	34	11	9.32306	4.5045	11.0677	6.70732
1700019B03Rik	6.72401	NA	6.72401	NA	4.16864	NA	4.47373	NA	1	NA	1	NA	0.619963	NA	0.665336	NA
1700020I14Rik	44.0732	NA	44.0732	NA	Inf	NA	Inf	NA	17	NA	17	NA	Inf	NA	Inf	NA
1700021F05Rik	33.4048	NA	30.5507	2.85406	37.1991	NA	42.2555	26.4265	9	NA	8	1	10.0223	NA	11.065	9.25926
1700021K19Rik	7.7106	NA	5.03311	2.67749	1.44312	NA	1.75309	1.18159	5	NA	3	2	0.935804	NA	1.04493	0.882613
1700025G04Rik	70.2445	NA	NA	70.2445	7.20161	NA	NA	7.91933	30	NA	NA	30	3.07566	NA	NA	3.38219
1700030K09Rik	76.3909	NA	17.8155	58.5754	31.4754	NA	9.25001	150.193	8	NA	4	4	3.29625	NA	2.07684	10.2564
1700049G17Rik	19.9414	NA	19.9414	NA	3.86611	NA	8.82754	NA	2	NA	2	NA	0.387747	NA	0.885347	NA
1700052K11Rik	85.8395	NA	85.8395	NA	Inf	NA	Inf	NA	7	NA	7	NA	Inf	NA	Inf	NA
1700052N19Rik	26.4571	NA	17.4037	9.05343	11.5533	NA	13.1846	10.0149	8	NA	4	4	3.49345	NA	3.0303	4.42478
1700086O06Rik	7.32739	NA	7.32739	NA	Inf	NA	Inf	NA	1	NA	1	NA	Inf	NA	Inf	NA
1700094D03Rik	64.85	NA	NA	64.85	20.9396	NA	NA	23.7025	3	NA	1	2	0.968679	NA	3.11526	0.730994
1700096K18Rik	26.1674	NA	26.1674	NA	Inf	NA	Inf	NA	3	NA	3	NA	Inf	NA	Inf	NA
1700109H08Rik	2.56429	NA	NA	2.56429	3.58642	NA	NA	56.9843	1	NA	NA	1	1.3986	NA	NA	22.2222
1700123O20Rik	38.5175	NA	3.06132	35.4562	20.3904	NA	7.13595	69.6586	14	1	5	8	7.41133	1.05152	11.655	15.7171
1810010H24Rik	8.39204	NA	NA	8.39204	7.63607	NA	NA	12.5818	1	NA	NA	1	0.909918	NA	NA	1.49925
1810011O10Rik	46.4095	7.05604	2.91568	36.4378	34.8682	141.121	9.08312	37.9561	27	2	4	21	20.2855	40	12.4611	21.875
1810013L24Rik	62.8575	19.7636	20.2248	22.869	15.4289	54.899	24.4261	7.92412	36	2	14	20	8.83652	5.55556	16.9082	6.93001
1810019D21Rik	5.11174	NA	5.11174	NA	Inf	NA	Inf	NA	2	NA	2	NA	Inf	NA	Inf	NA
1810021B22Rik	9.26352	NA	9.26352	NA	Inf	NA	Inf	NA	1	NA	1	NA	Inf	NA	Inf	NA
1810022K09Rik	1.16694	NA	NA	1.16694	2.91007	NA	NA	20.4726	2	NA	1	1	4.98753	NA	3.40136	17.5439
1810026B05Rik	19.6101	NA	19.6101	NA	Inf	NA	Inf	NA	7	NA	7	NA	Inf	NA	Inf	NA
1810026J23Rik	27.1627	1.71247	8.41753	17.0327	8.56866	7.22561	10.5088	7.98906	9	1	2	6	2.83912	4.21941	2.49688	2.81426
1810030O07Rik	20.2288	NA	NA	20.2288	7.86502	NA	NA	12.6115	10	NA	NA	10	3.88802	NA	NA	6.23441
1810032O08Rik	2.23826	NA	2.23826	NA	Inf	NA	Inf	NA	2	NA	2	NA	Inf	NA	Inf	NA
1810037I17Rik	3.80236	NA	NA	3.80236	3.89586	NA	NA	5.31799	2	NA	NA	2	2.04918	NA	NA	2.7972
1810043H04Rik	2.35345	NA	0.918592	1.43486	4.76407	NA	4.08263	6.49258	2	NA	1	1	4.04858	NA	4.44444	4.52489
1810055G02Rik	44.9982	NA	38.5484	6.4498	23.9098	NA	32.6958	22.3951	11	NA	8	3	5.84485	NA	6.78541	10.4167
1810058I24Rik	22.7795	NA	22.7795	NA	Inf	NA	Inf	NA	15	NA	15	NA	Inf	NA	Inf	NA
1810062O18Rik	53.1481	NA	50.7327	2.41542	Inf	NA	Inf	Inf	15	NA	14	1	Inf	NA	Inf	Inf
2010012O05Rik	20.6226	NA	0.848181	19.7744	9.4773	NA	2.66724	10.889	4	NA	1	3	1.83824	NA	3.14465	1.65198
2010107E04Rik	1.1606	NA	NA	1.1606	3.17972	NA	NA	8.66118	3	NA	NA	3	8.21918	NA	NA	22.3881
2010107G12Rik	8.63576	NA	NA	8.63576	4.00174	NA	NA	11.001	1	NA	NA	1	0.463392	NA	NA	1.27389
2010107G23Rik	6.56845	NA	NA	6.56845	3.7946	NA	NA	5.48285	3	NA	NA	3	1.7331	NA	NA	2.50417
2010111I01Rik	119.684	NA	18.5262	101.158	17.6917	NA	7.4944	25.1324	49	NA	6	43	7.24316	NA	2.42718	10.6832
2010300C02Rik	89.9784	NA	76.5532	13.4251	20.6325	NA	21.6988	23.107	46	NA	40	6	10.548	NA	11.3379	10.327
2010320M18Rik	22.3319	NA	22.3319	NA	Inf	NA	Inf	NA	5	NA	5	NA	Inf	NA	Inf	NA
2200002D01Rik	6.79619	6.79619	NA	NA	13.4047	76.3617	NA	NA	1	1	NA	NA	1.97239	11.236	NA	NA
2210013O21Rik	7.89513	7.89513	NA	NA	9.22328	15.4202	NA	NA	3	3	NA	NA	3.50467	5.85938	NA	NA
2210015D19Rik	11.228	NA	11.228	NA	Inf	NA	Inf	NA	1	NA	1	NA	Inf	NA	Inf	NA
2210016F16Rik	20.9639	NA	9.18316	11.7808	7.42875	NA	9.02965	6.79399	7	NA	5	2	2.48051	NA	4.91642	1.1534
2210016L21Rik	25.1165	NA	4.37512	20.7414	19.0277	NA	5.6746	38.1978	6	NA	2	4	4.54545	NA	2.59403	7.36648
2210018M11Rik	44.1141	NA	40.7215	3.39257	10.9901	NA	10.7303	40.3878	18	NA	18	NA	4.4843	NA	4.74308	NA
2210408I21Rik	54.6028	NA	54.6028	NA	9.69511	NA	14.279	NA	2	NA	2	NA	0.355114	NA	0.523013	NA
2300009A05Rik	9.79286	NA	9.79286	NA	16.376	NA	20.6601	NA	2	NA	2	NA	3.34448	NA	4.21941	NA
2310002J15Rik	10.412	NA	7.72107	2.69097	13.3317	NA	17.9978	10.721	2	NA	1	1	2.56082	NA	2.331	3.98406
2310003H01Rik	35.2215	NA	32.7276	2.49393	11.0934	NA	12.3968	5.03824	14	NA	13	1	4.40945	NA	4.92424	2.0202
2310007B03Rik	26.7324	NA	14.8202	11.9122	11.3177	NA	10.9052	18.2423	6	NA	4	2	2.54022	NA	2.94334	3.06279
2310009A05Rik	8.82099	NA	8.82099	NA	Inf	NA	Inf	NA	2	NA	2	NA	Inf	NA	Inf	NA
2310014L17Rik	102.683	NA	8.9928	93.6899	31.702	NA	9.0018	43.0165	8	NA	1	7	2.4699	NA	1.001	3.21396
2310022A10Rik	37.2447	NA	21.5956	15.6491	13.6979	NA	17.8624	12.4101	9	NA	5	4	3.31004	NA	4.13565	3.17209
2310022B05Rik	14.9406	NA	1.70943	13.2312	4.51787	NA	1.76411	6.14832	13	NA	2	11	3.93106	NA	2.06398	5.11152
2310030G06Rik	70.2739	NA	13.941	56.3329	56.5812	NA	32.7253	69.5468	10	NA	2	8	8.05153	NA	4.69484	9.87654
2310035C23Rik	10.5469	NA	8.50717	2.03973	1.95096	NA	2.33009	1.35261	7	NA	4	3	1.29486	NA	1.09559	1.98939
2310036O22Rik	19.5245	NA	2.78873	16.7358	21.8885	NA	5.3424	55.052	11	NA	4	7	12.3318	NA	7.66284	23.0263
2310039H08Rik	6.14822	NA	NA	6.14822	7.95371	NA	NA	24.5929	4	NA	NA	4	5.17464	NA	NA	16
2310045N01Rik	2.06769	NA	NA	2.06769	3.44616	NA	NA	9.66213	2	NA	NA	2	3.33333	NA	NA	9.34579
2310047M10Rik	26.1248	NA	19.7206	6.40422	14.4977	NA	18.2093	9.20147	7	NA	4	3	3.88457	NA	3.69344	4.31034
2310057M21Rik	55.237	NA	39.8869	15.3501	24.949	NA	29.8778	18.0166	13	NA	11	2	5.87173	NA	8.2397	2.34742
2310061I04Rik	1.59734	NA	NA	1.59734	1.28817	NA	NA	9.07578	1	NA	NA	1	0.806452	NA	NA	5.68182
2310067B10Rik	10.6446	1.68396	5.14547	3.81519	2.13063	7.41834	1.26022	5.56151	12	1	7	4	2.40192	4.40529	1.71443	5.8309
2410002F23Rik	54.6547	4.31714	36.6072	13.7304	27.5755	12.887	42.8154	17.3364	17	1	11	5	8.57719	2.98507	12.8655	6.31313
2410004B18Rik	15.2132	NA	NA	15.2132	15.6033	NA	NA	37.5635	8	NA	NA	8	8.20513	NA	NA	19.7531
2410004N09Rik	0.538928	NA	0.538928	NA	Inf	NA	Inf	NA	1	NA	1	NA	Inf	NA	Inf	NA
2410006H16Rik	2.08572	NA	2.08572	NA	Inf	NA	Inf	NA	7	NA	7	NA	Inf	NA	Inf	NA
2410015M20Rik	6.06239	1.28933	1.77874	2.99431	8.02965	12.5178	4.94096	10.2545	6	1	2	3	7.94702	9.70874	5.55556	10.274
2410016O06Rik	51.4243	NA	46.177	5.24726	21.92	NA	25.484	11.6606	13	NA	12	1	5.54135	NA	6.62252	2.22222
2410089E03Rik	78.3925	NA	75.7683	2.62418	7.48806	NA	7.85571	8.66065	15	NA	13	2	1.4328	NA	1.34785	6.60066
2410131K14Rik	16.0937	NA	NA	16.0937	6.02762	NA	NA	8.33441	5	NA	NA	5	1.87266	NA	NA	2.58933
2500004C02Rik	16.6144	NA	16.6144	NA	Inf	NA	Inf	NA	1	NA	1	NA	Inf	NA	Inf	NA
2510002D24Rik	20.3012	3.44888	5.14186	11.7104	16.4782	215.555	16.1694	13.0406	13	1	3	9	10.5519	62.5	9.43396	10.0223
2510003E04Rik	21.6765	NA	21.6765	NA	8.76883	NA	11.6918	NA	7	NA	7	NA	2.83172	NA	3.77562	NA
2510009E07Rik	63.9646	NA	45.1885	18.7761	12.3866	NA	60.4933	4.51674	13	NA	7	6	2.51743	NA	9.37082	1.44335
2510039O18Rik	99.2038	NA	75.4559	23.7479	36.3251	NA	39.6094	34.1205	30	NA	20	10	10.985	NA	10.4987	14.3678
2610001J05Rik	11.5903	NA	11.5903	NA	Inf	NA	Inf	NA	6	NA	6	NA	Inf	NA	Inf	NA
2610002J02Rik	15.7623	NA	8.99468	6.76763	14.649	NA	16.0333	14.0992	7	NA	4	3	6.50558	NA	7.13012	6.25
2610008E11Rik	25.2601	NA	25.2601	NA	5.97308	NA	12.5672	NA	5	NA	5	NA	1.18231	NA	2.48756	NA
2610018G03Rik	3.09411	NA	NA	3.09411	1.54474	NA	NA	5.88234	2	NA	NA	2	0.998502	NA	NA	3.80228
2610020C07Rik	34.2276	NA	0.741789	33.4858	Inf	NA	Inf	Inf	20	NA	2	18	Inf	NA	Inf	Inf
2610035D17Rik	130.985	NA	130.985	NA	Inf	NA	Inf	NA	25	NA	25	NA	Inf	NA	Inf	NA
2610203C20Rik	19.8198	NA	19.8198	NA	Inf	NA	Inf	NA	8	NA	8	NA	Inf	NA	Inf	NA
2610301B20Rik	31.2427	NA	NA	31.2427	14.751	NA	NA	22.7882	8	NA	NA	8	3.77715	NA	NA	5.83516
2610306M01Rik	40.3939	NA	40.3939	NA	Inf	NA	Inf	NA	4	NA	4	NA	Inf	NA	Inf	NA
2610307P16Rik	14.6086	NA	14.6086	NA	Inf	NA	Inf	NA	3	NA	3	NA	Inf	NA	Inf	NA
2610507B11Rik	53.7045	NA	43.2666	10.4379	7.21543	NA	6.45288	16.2584	36	NA	32	4	4.83676	NA	4.77256	6.23053
2610507I01Rik	25.3166	NA	25.3166	NA	Inf	NA	Inf	NA	5	NA	5	NA	Inf	NA	Inf	NA
2610528A11Rik	1.04617	NA	NA	1.04617	1.38383	NA	NA	2.24501	1	NA	NA	1	1.32275	NA	NA	2.14592
2610528J11Rik	13.8191	NA	1.49388	12.3252	15.1028	NA	4.44606	29.2066	4	NA	1	3	4.37158	NA	2.97619	7.109
2700029M09Rik	0.917362	NA	0.917362	NA	0.775454	NA	0.881231	NA	1	NA	1	NA	0.845309	NA	0.960615	NA
2700049A03Rik	14.7655	14.7655	NA	NA	2.56213	14.8846	NA	NA	5	4	1	NA	0.867604	4.03226	0.219154	NA
2700060E02Rik	4.81832	NA	2.71117	2.10715	3.19094	NA	3.68867	3.0942	5	NA	3	2	3.31126	NA	4.08163	2.93686
2700062C07Rik	8.51962	NA	8.51962	NA	8.25544	NA	13.0269	NA	3	NA	3	NA	2.90698	NA	4.58716	NA
2700081O15Rik	64.7264	NA	27.8818	36.8446	12.9738	NA	13.6877	13.1682	31	NA	12	19	6.21367	NA	5.89102	6.79056
2700089E24Rik	64.5944	1.91592	5.1085	57.57	23.5918	10.9481	18.1152	25.2389	21	2	3	16	7.66983	11.4286	10.6383	7.01447
2700094K13Rik	1.96831	NA	1.96831	NA	2.89883	NA	5.60771	NA	4	NA	4	NA	5.89102	NA	11.396	NA
2700099C18Rik	15.1052	NA	15.1052	NA	Inf	NA	Inf	NA	2	NA	2	NA	Inf	NA	Inf	NA
2810001G20Rik	15.1193	NA	15.1193	NA	Inf	NA	Inf	NA	2	NA	2	NA	Inf	NA	Inf	NA
2810004N23Rik	20.0948	NA	13.8802	6.21469	14.5404	NA	16.4068	12.9743	9	NA	6	3	6.5123	NA	7.0922	6.26305
2810006K23Rik	26.9709	NA	13.5791	13.3918	9.36489	NA	20.8589	6.46945	3	NA	1	2	1.04167	NA	1.5361	0.966184
2810013P06Rik	21.249	NA	21.249	NA	Inf	NA	Inf	NA	6	NA	6	NA	Inf	NA	Inf	NA
2810021J22Rik	13.7669	NA	13.7669	NA	2.81417	NA	8.49811	NA	1	NA	1	NA	0.204415	NA	0.617284	NA
2810025M15Rik	9.97243	NA	9.97243	NA	Inf	NA	Inf	NA	7	NA	7	NA	Inf	NA	Inf	NA
2810029C07Rik	3.32066	NA	3.32066	NA	Inf	NA	Inf	NA	1	NA	1	NA	Inf	NA	Inf	NA
2810403A07Rik	52.2233	NA	7.74989	44.4734	17.4136	NA	4.21419	40.2839	28	NA	7	21	9.33645	NA	3.80642	19.0217
2810408M09Rik	37.7275	NA	NA	37.7275	20.1967	NA	NA	33.6552	4	NA	NA	4	2.14133	NA	NA	3.56824
2810410L24Rik	4.40749	NA	4.40749	NA	Inf	NA	Inf	NA	1	NA	1	NA	Inf	NA	Inf	NA
2810428I15Rik	2.47047	NA	2.47047	NA	3.76023	NA	4.84406	NA	1	NA	1	NA	1.52207	NA	1.96078	NA
2810474O19Rik	145.759	2.80793	130.378	12.5733	23.7045	4.19721	28.5541	13.7564	50	2	45	3	8.1314	2.98954	9.85545	3.28228
2900026A02Rik	148.13	NA	3.81189	144.318	25.3734	NA	4.11207	30.6668	82	NA	5	77	14.0459	NA	5.39374	16.3621
2900056M20Rik	1.12826	NA	1.12826	NA	Inf	NA	Inf	NA	1	NA	1	NA	Inf	NA	Inf	NA
2900097C17Rik	0.985422	NA	0.985422	NA	Inf	NA	Inf	NA	1	NA	1	NA	Inf	NA	Inf	NA
3000002C10Rik	3.12947	NA	3.12947	NA	Inf	NA	Inf	NA	1	NA	1	NA	Inf	NA	Inf	NA
3010026O09Rik	20.1421	NA	16.9432	3.19887	17.6685	NA	16.8088	32.978	4	NA	3	1	3.50877	NA	2.97619	10.3093
3110002H16Rik	9.39234	NA	2.32714	7.0652	4.41162	NA	1.1789	84.1095	4	NA	3	1	1.87882	NA	1.51976	11.9048
3110043O21Rik	31.8826	NA	29.4221	2.46049	9.96954	NA	20.3472	1.53781	6	NA	5	1	1.87617	NA	3.45781	0.625
3110052M02Rik	7.68464	NA	7.68464	NA	1.75971	NA	5.5565	NA	1	NA	1	NA	0.22899	NA	0.723066	NA
3110082I17Rik	17.7406	NA	NA	17.7406	12.1428	NA	NA	22.0106	4	NA	NA	4	2.73785	NA	NA	4.96278
3632451O06Rik	29.1034	NA	29.1034	NA	10.5908	NA	12.5015	NA	3	NA	3	NA	1.0917	NA	1.28866	NA
3830406C13Rik	2.65263	NA	NA	2.65263	1.03659	NA	NA	1.24889	3	NA	NA	3	1.17233	NA	NA	1.41243
4632415L05Rik	26.4288	NA	26.4288	NA	Inf	NA	Inf	NA	7	NA	7	NA	Inf	NA	Inf	NA
4632427E13Rik	5.13478	NA	5.13478	NA	Inf	NA	Inf	NA	1	NA	1	NA	Inf	NA	Inf	NA
4632434I11Rik	104.608	NA	100.561	4.04708	30.3299	NA	37.2447	8.44901	19	NA	17	2	5.50884	NA	6.2963	4.17537
4732416N19Rik	7.86009	NA	4.15578	3.70432	Inf	NA	Inf	Inf	3	NA	1	2	Inf	NA	Inf	Inf
4732471J01Rik	2.10564	NA	2.10564	NA	Inf	NA	Inf	NA	1	NA	1	NA	Inf	NA	Inf	NA
4833418N02Rik	52.9622	NA	52.9622	NA	Inf	NA	Inf	NA	4	NA	4	NA	Inf	NA	Inf	NA
4833420G17Rik	50.0444	1.3913	34.7013	13.9518	18.5349	2.39879	18.0736	69.7589	29	1	23	5	10.7407	1.72414	11.9792	25
4833439L19Rik	0.243498	NA	NA	0.243498	0.0910615	NA	NA	0.174676	1	NA	NA	1	0.373972	NA	NA	0.71736
4921507L20Rik	2.36228	NA	NA	2.36228	Inf	NA	NA	Inf	1	NA	NA	1	Inf	NA	NA	Inf
4921524J17Rik	18.7486	NA	2.11794	16.6307	11.7546	NA	4.55471	16.4172	4	NA	1	3	2.50784	NA	2.15054	2.9615
4930404I05Rik	2.37068	NA	0.519146	1.85153	Inf	NA	Inf	Inf	3	NA	1	2	Inf	NA	Inf	Inf
4930412O13Rik	51.384	NA	51.384	NA	Inf	NA	Inf	NA	10	NA	10	NA	Inf	NA	Inf	NA
4930414L22Rik	18.5835	NA	18.5835	NA	Inf	NA	Inf	NA	5	NA	5	NA	Inf	NA	Inf	NA
4930427A07Rik	25.4609	NA	1.7514	23.7095	7.58896	NA	1.3867	11.4208	9	NA	2	7	2.68256	NA	1.58353	3.37187
4930453N24Rik	39.2472	NA	16.7286	22.5186	29.487	NA	15.9777	108.263	9	NA	5	4	6.76183	NA	4.77555	19.2308
4930503E24Rik	0.686859	NA	0.686859	NA	Inf	NA	Inf	NA	2	NA	2	NA	Inf	NA	Inf	NA
4930503L19Rik	9.71176	NA	NA	9.71176	4.23909	NA	NA	55.1805	1	NA	NA	1	0.436491	NA	NA	5.68182
4930506M07Rik	30.6498	NA	1.34867	29.3011	7.51036	NA	0.800399	15.9332	16	NA	1	15	3.92061	NA	0.593472	8.15661
4930512B01Rik	11.4378	NA	5.31815	6.11967	Inf	NA	Inf	Inf	12	NA	7	5	Inf	NA	Inf	Inf
4930513N10Rik	12.9328	NA	12.9328	NA	Inf	NA	Inf	NA	1	NA	1	NA	Inf	NA	Inf	NA
4930520O04Rik	1.70309	NA	0.506222	1.19687	Inf	NA	Inf	Inf	2	NA	1	1	Inf	NA	Inf	Inf
4930523C07Rik	116.743	5.65123	6.06226	105.029	28.9397	9.27953	20.2075	33.6094	42	3	3	36	10.4115	4.92611	10	11.52
4930526I15Rik	3.57167	NA	3.57167	NA	Inf	NA	Inf	NA	2	NA	2	NA	Inf	NA	Inf	NA
4930528A17Rik	2.16578	2.16578	NA	NA	Inf	Inf	NA	NA	1	1	NA	NA	Inf	Inf	NA	NA
4930538K18Rik	0.892721	NA	NA	0.892721	0.593564	NA	NA	1.4422	1	NA	NA	1	0.664894	NA	NA	1.61551
4930558K02Rik	70.1445	NA	51.9494	18.1951	60.2616	NA	122.812	60.4487	19	NA	14	5	16.323	NA	33.0969	16.6113
4930562F07Rik	6.50512	NA	NA	6.50512	Inf	NA	NA	Inf	NA	NA	NA	NA	NA	NA	NA	NA
4930565N06Rik	0.341886	NA	0.341886	NA	Inf	NA	Inf	NA	1	NA	1	NA	Inf	NA	Inf	NA
4930579G24Rik	18.2107	NA	NA	18.2107	9.24872	NA	NA	11.8637	5	NA	NA	5	2.53936	NA	NA	3.25733
4930581F22Rik	2.13885	NA	NA	2.13885	Inf	NA	NA	Inf	2	NA	1	1	Inf	NA	Inf	Inf
4930599N23Rik	46.8502	NA	6.41467	40.4355	Inf	NA	Inf	Inf	12	NA	3	9	Inf	NA	Inf	Inf
4931406C07Rik	1.70528	NA	NA	1.70528	0.57205	NA	NA	1.15144	1	NA	NA	1	0.335458	NA	NA	0.675219
4931406P16Rik	102.113	49.7266	50.2963	2.09063	17.5815	120.403	15.8164	0.943853	22	7	14	1	3.78788	16.9492	4.40252	0.451467
4931414P19Rik	30.4019	4.24366	26.1583	NA	11.7609	12.4448	16.0875	NA	6	1	5	NA	2.32108	2.93255	3.07503	NA
4931428F04Rik	18.4007	NA	13.9908	4.40994	5.17893	NA	9.96495	2.80709	6	NA	4	2	1.68871	NA	2.849	1.27307
4932416H05Rik	39.0723	NA	39.0723	NA	Inf	NA	Inf	NA	3	NA	3	NA	Inf	NA	Inf	NA
4932438A13Rik	56.7861	NA	53.2332	3.55285	3.57527	NA	3.54463	7.2066	32	NA	31	1	2.01473	NA	2.06419	2.0284
4932702P03Rik	3.60667	NA	NA	3.60667	Inf	NA	NA	Inf	1	NA	NA	1	Inf	NA	NA	Inf
4933407K13Rik	14.6549	NA	14.6549	NA	Inf	NA	Inf	NA	1	NA	1	NA	Inf	NA	Inf	NA
4933426M11Rik	38.6749	NA	10.9219	27.753	7.63572	NA	11.2365	7.47657	31	NA	11	20	6.12043	NA	11.3169	5.38793
4933427D14Rik	46.0075	NA	23.9229	22.0846	10.6204	NA	8.30657	18.043	12	NA	4	8	2.77008	NA	1.38889	6.53595
4933434E20Rik	2.38943	NA	2.38943	NA	0.843725	NA	4.28982	NA	2	NA	2	NA	0.706215	NA	3.59066	NA
4933439C10Rik	2.04531	NA	2.04531	NA	Inf	NA	Inf	NA	1	NA	1	NA	Inf	NA	Inf	NA
5031425E22Rik	23.1314	NA	23.1314	NA	Inf	NA	Inf	NA	5	NA	5	NA	Inf	NA	Inf	NA
5031439G07Rik	40.8704	NA	0.84583	40.0246	8.1221	NA	0.629338	11.3771	18	NA	1	17	3.57711	NA	0.744048	4.83229
5330426P16Rik	23.5294	NA	23.5294	NA	Inf	NA	Inf	NA	2	NA	2	NA	Inf	NA	Inf	NA
5430405H02Rik	8.23722	NA	8.23722	NA	Inf	NA	Inf	NA	2	NA	2	NA	Inf	NA	Inf	NA
5430416N02Rik	6.86613	NA	6.86613	NA	Inf	NA	Inf	NA	3	NA	3	NA	Inf	NA	Inf	NA
5430417L22Rik	42.9185	NA	42.9185	NA	Inf	NA	Inf	NA	15	NA	15	NA	Inf	NA	Inf	NA
5430435G22Rik	90.3164	NA	1.90077	88.4156	35.7972	NA	3.16796	50.0371	43	NA	3	40	17.0432	NA	5	22.6372
5730409E04Rik	6.72472	NA	6.72472	NA	2.35542	NA	9.70378	NA	1	NA	1	NA	0.350263	NA	1.443	NA
5730455P16Rik	19.145	NA	10.2512	8.89377	4.22068	NA	8.67279	2.67885	5	NA	1	4	1.10229	NA	0.846024	1.20482
5730508B09Rik	13.6351	NA	6.46935	7.16572	8.50597	NA	16.3367	6.71577	6	NA	3	3	3.74298	NA	7.57576	2.81162
5730559C18Rik	35.0095	NA	20.0316	14.978	11.6195	NA	9.84836	18.6293	7	NA	4	3	2.32327	NA	1.96657	3.73134
5830417I10Rik	44.305	NA	44.305	NA	Inf	NA	Inf	NA	8	NA	8	NA	Inf	NA	Inf	NA
5830418K08Rik	98.4842	NA	98.4842	NA	13.361	NA	13.7875	NA	37	NA	37	NA	5.01967	NA	5.1799	NA
5930412G12Rik	37.6443	NA	37.6443	NA	Inf	NA	Inf	NA	6	NA	6	NA	Inf	NA	Inf	NA
5930430L01Rik	80.2781	NA	80.2781	NA	Inf	NA	Inf	NA	8	NA	8	NA	Inf	NA	Inf	NA
6030419C18Rik	5.86816	NA	5.86816	NA	2.74341	NA	6.67595	NA	1	NA	1	NA	0.467508	NA	1.13766	NA
6030458C11Rik	46.6686	NA	25.3685	21.3001	8.5255	NA	19.0311	5.28407	9	NA	3	6	1.64414	NA	2.25056	1.48846
6330408A02Rik	15.1454	NA	15.1454	NA	4.52506	NA	5.93937	NA	2	NA	2	NA	0.59755	NA	0.784314	NA
6330416G13Rik	5.34528	NA	NA	5.34528	1.47253	NA	NA	2.23839	1	NA	NA	1	0.275482	NA	NA	0.41876
6430548M08Rik	25.694	NA	NA	25.694	4.0888	NA	NA	5.56992	5	NA	NA	5	0.795672	NA	NA	1.08389
6430571L13Rik	5.18997	NA	NA	5.18997	2.03369	NA	NA	3.13026	1	NA	NA	1	0.39185	NA	NA	0.603136
6430573F11Rik	20.6525	NA	7.6424	13.0101	11.3164	NA	5.68631	30.612	2	NA	1	1	1.09589	NA	0.744048	2.35294
6820431F20Rik	15.0784	NA	15.0784	NA	Inf	NA	Inf	NA	2	NA	2	NA	Inf	NA	Inf	NA
8030462N17Rik	28.3959	NA	23.7724	4.62351	8.30774	NA	19.8103	2.48844	14	NA	10	4	4.09596	NA	8.33333	2.15285
8430419L09Rik	2.89768	NA	1.08955	1.80814	0.688449	NA	0.581092	0.801478	2	NA	1	1	0.475172	NA	0.533333	0.443262
8430427H17Rik	41.3614	NA	NA	41.3614	6.34085	NA	NA	9.9642	3	NA	NA	3	0.459911	NA	NA	0.722717
9030624G23Rik	2.51903	2.51903	NA	NA	1.11068	8.36886	NA	NA	1	1	NA	NA	0.440917	3.32226	NA	NA
9030624J02Rik	1.96098	NA	0.761129	1.19985	0.54822	NA	0.255756	6.09062	2	NA	1	1	0.559128	NA	0.336022	5.07614
9130008F23Rik	39.3018	NA	6.71429	32.5875	18.2037	NA	12.2972	20.4824	10	NA	3	7	4.63177	NA	5.49451	4.39975
9130011E15Rik	11.5413	NA	1.67542	9.8659	3.98526	NA	0.809381	13.2964	5	NA	1	4	1.72652	NA	0.483092	5.39084
9130019O22Rik	17.8092	NA	10.8424	6.96681	4.59237	NA	6.64362	3.42013	2	NA	1	1	0.51573	NA	0.612745	0.490918
9130023H24Rik	102.402	30.2727	25.0508	47.0783	28.5959	49.4652	24.7049	24.081	16	6	4	6	4.46803	9.80392	3.94477	3.06905
9130221H12Rik	2.12118	NA	NA	2.12118	Inf	NA	NA	Inf	NA	NA	NA	NA	NA	NA	NA	NA
9130401M01Rik	3.87757	NA	3.87757	NA	2.9645	NA	3.46521	NA	3	NA	3	NA	2.29358	NA	2.68097	NA
9230110C19Rik	1.52633	NA	0.547062	0.979271	0.958752	NA	0.680426	1.31622	2	NA	1	1	1.25628	NA	1.24378	1.34409
9230114K14Rik	6.06889	NA	6.06889	NA	Inf	NA	Inf	NA	1	NA	1	NA	Inf	NA	Inf	NA
9330020H09Rik	42.4678	NA	42.4678	NA	Inf	NA	Inf	NA	3	NA	3	NA	Inf	NA	Inf	NA
9330133O14Rik	22.3976	NA	22.3976	NA	Inf	NA	Inf	NA	10	NA	10	NA	Inf	NA	Inf	NA
9330162012Rik	26.4735	NA	26.4735	NA	Inf	NA	Inf	NA	15	NA	15	NA	Inf	NA	Inf	NA
9330175M20Rik	57.7236	NA	8.60808	49.1156	Inf	NA	Inf	Inf	5	NA	1	4	Inf	NA	Inf	Inf
9430008C03Rik	12.2658	NA	12.2658	NA	Inf	NA	Inf	NA	9	NA	9	NA	Inf	NA	Inf	NA
9430015G10Rik	25.6116	NA	2.00343	23.6082	9.62842	NA	3.33905	13.4981	13	NA	2	11	4.88722	NA	3.33333	6.28931
9430016H08Rik	7.08053	NA	4.70939	2.37114	5.34379	NA	5.37601	10.5855	5	NA	4	1	3.77358	NA	4.56621	4.46429
9430020K01Rik	54.0101	NA	54.0101	NA	8.02408	NA	13.6286	NA	7	NA	7	NA	1.03996	NA	1.76634	NA
9430038I01Rik	14.6218	NA	NA	14.6218	12.9971	NA	NA	19.418	3	NA	NA	3	2.66667	NA	NA	3.98406
9430060I03Rik	4.07296	NA	0.636121	3.43684	Inf	NA	Inf	Inf	2	NA	1	1	Inf	NA	Inf	Inf
9530068E07Rik	34.2384	1.57639	17.0569	15.6051	13.8786	39.4097	21.8678	9.47489	21	1	8	12	8.51236	25	10.2564	7.28597
9530080O11Rik	0.532664	NA	0.532664	NA	Inf	NA	Inf	NA	1	NA	1	NA	Inf	NA	Inf	NA
9530082P21Rik	112.695	NA	112.695	NA	Inf	NA	Inf	NA	12	NA	12	NA	Inf	NA	Inf	NA
9630033F20Rik	26.7412	NA	26.7412	NA	7.32034	NA	33.0138	NA	3	NA	3	NA	0.821243	NA	3.7037	NA
9930012K11Rik	35.9879	NA	16.4942	19.4938	18.1208	NA	14.9811	25.5489	3	NA	1	2	1.51057	NA	0.908265	2.62123
9930021J03Rik	222.87	NA	215.188	7.68198	27.7685	NA	34.2384	4.7833	68	NA	65	3	8.47246	NA	10.3421	1.868
A130010J15Rik	85.4392	5.46007	73.2532	6.72602	22.2846	15.9186	92.4914	2.49204	18	1	14	3	4.69484	2.91545	17.6768	1.11152
A230046K03Rik	31.2959	NA	14.1559	17.14	5.34241	NA	4.01928	7.66888	11	NA	3	8	1.87777	NA	0.851789	3.57942
A230050P20Rik	30.9919	NA	NA	30.9919	18.4147	NA	NA	57.8206	5	NA	NA	5	2.97089	NA	NA	9.32836
A230056P14Rik	124.598	NA	55.6739	68.9237	Inf	NA	Inf	Inf	13	NA	9	4	Inf	NA	Inf	Inf
A230103J11Rik	1.35518	NA	1.35518	NA	Inf	NA	Inf	NA	2	NA	2	NA	Inf	NA	Inf	NA
A330009N23Rik	4.61169	NA	4.61169	NA	Inf	NA	Inf	NA	1	NA	1	NA	Inf	NA	Inf	NA
A3galt2	32.9639	4.72568	2.04503	26.1932	9.72385	7.25911	1.8374	16.109	8	1	1	6	2.35988	1.5361	0.898473	3.69004
A430005L14Rik	22.8663	5.68901	8.28573	8.8916	20.8444	80.1269	11.9563	26.7015	4	1	1	2	3.64631	14.0845	1.443	6.00601
A430033K04Rik	78.3443	NA	42.7565	35.5878	24.9345	NA	20.9283	35.3053	10	NA	7	3	3.18269	NA	3.42633	2.97619
A530054K11Rik	34.4403	NA	NA	34.4403	6.64999	NA	NA	15.7549	4	NA	NA	4	0.77235	NA	NA	1.82983
A630007B06Rik	51.0925	NA	51.0925	NA	18.5521	NA	18.5521	NA	13	NA	13	NA	4.72041	NA	4.72041	NA
A630023A22Rik	27.814	2.68017	9.68849	15.4454	20.8501	8.45481	16.1475	37.0392	44	1	17	26	32.9835	3.15457	28.3333	62.3501
A630066F11Rik	7.18255	NA	7.18255	NA	Inf	NA	Inf	NA	1	NA	1	NA	Inf	NA	Inf	NA
A630072M18Rik	12.022	NA	12.022	NA	Inf	NA	Inf	NA	1	NA	1	NA	Inf	NA	Inf	NA
A730017C20Rik	13.9002	NA	11.6884	2.21173	7.46919	NA	18.4651	1.80844	4	NA	3	1	2.14938	NA	4.73934	0.817661
A730056A06Rik	6.50041	6.50041	NA	NA	Inf	Inf	NA	NA	1	1	NA	NA	Inf	Inf	NA	NA
A730090H04Rik	19.3578	NA	19.3578	NA	Inf	NA	Inf	NA	6	NA	6	NA	Inf	NA	Inf	NA
A830010M20Rik	93.2218	NA	81.0929	12.1289	13.7984	NA	24.8218	3.54956	5	NA	4	1	0.740083	NA	1.22436	0.292654
A830080D01Rik	50.8645	NA	37.6986	13.1659	15.1113	NA	16.6882	14.5802	14	NA	9	5	4.15924	NA	3.98406	5.5371
A930004D18Rik	16.4646	NA	16.4646	NA	Inf	NA	Inf	NA	2	NA	2	NA	Inf	NA	Inf	NA
A930005H10Rik	6.47885	NA	6.47885	NA	Inf	NA	Inf	NA	1	NA	1	NA	Inf	NA	Inf	NA
A930015D03Rik	1.76693	NA	1.76693	NA	Inf	NA	Inf	NA	1	NA	1	NA	Inf	NA	Inf	NA
AA987161	90.1207	NA	23.2614	66.8593	18.6392	NA	7.41282	42.6399	6	NA	1	5	1.24095	NA	0.318674	3.18878
Aacs	14.2574	NA	NA	14.2574	4.49333	NA	NA	13.5784	6	NA	NA	6	1.89095	NA	NA	5.71429
Aadac	1.43167	NA	1.43167	NA	1.10639	NA	1.19605	NA	1	NA	1	NA	0.772798	NA	0.835422	NA
Aadacl2	0.409048	NA	0.409048	NA	0.257263	NA	0.339178	NA	1	NA	1	NA	0.628931	NA	0.829187	NA
Aaed1	8.12143	NA	NA	8.12143	8.35538	NA	NA	30.6469	2	NA	NA	2	2.05761	NA	NA	7.54717
Aagab	18.1443	NA	NA	18.1443	6.97859	NA	NA	11.3049	7	NA	NA	7	2.69231	NA	NA	4.36137
Aak1	145.915	3.57999	4.72025	137.615	7.54276	6.67908	1.63897	8.63924	45	2	3	40	2.32618	3.73134	1.04167	2.51114
Aamdc	3.60377	NA	NA	3.60377	4.03558	NA	NA	13.3473	1	NA	NA	1	1.11982	NA	NA	3.7037
Aamp	6.00736	NA	4.99982	1.00753	3.30075	NA	3.81375	2.55719	11	NA	10	1	6.04396	NA	7.62777	2.53807
Aar2	58.6247	NA	20.8623	37.7624	16.33	NA	18.0626	19.4652	22	NA	9	13	6.12813	NA	7.79221	6.70103
Aars	5.80613	NA	NA	5.80613	1.56289	NA	NA	15.9072	3	NA	1	2	0.807537	NA	0.343997	5.47945
Aars2	1.01778	NA	1.01778	NA	0.303906	NA	0.345831	NA	1	NA	1	NA	0.298597	NA	0.339789	NA
Aasdh	19.3219	NA	19.3219	NA	5.23063	NA	5.84982	NA	7	NA	7	NA	1.89496	NA	2.11929	NA
Aasdhppt	9.59333	NA	8.51541	1.07792	3.34262	NA	9.15635	0.572753	5	NA	4	1	1.74216	NA	4.30108	0.53135
Abat	3.39096	NA	NA	3.39096	0.731599	NA	NA	1.153	1	NA	NA	1	0.21575	NA	NA	0.34002
Abca1	86.1516	NA	8.56114	77.5905	8.39684	NA	1.26159	24.6007	11	NA	2	9	1.07212	NA	0.294724	2.85352
Abca2	5.42861	NA	0.296175	5.13244	0.673442	NA	0.0405608	7.74124	3	NA	1	2	0.372162	NA	0.136949	3.01659
Abca3	9.59695	NA	4.14595	5.45101	1.48124	NA	0.810547	6.77986	4	NA	2	2	0.617379	NA	0.391007	2.48756
Abcb10	22.5992	NA	4.19793	18.4013	5.2483	NA	1.95434	9.95201	6	NA	2	4	1.3934	NA	0.931099	2.16333
Abcb6	6.52735	NA	6.52735	NA	2.22549	NA	2.581	NA	1	NA	1	NA	0.340948	NA	0.395413	NA
Abcb7	15.9858	NA	6.30295	9.68289	2.7758	NA	2.79015	2.78404	6	NA	2	4	1.04185	NA	0.885347	1.15009
Abcb8	33.2855	29.4421	NA	3.84333	11.3216	88.4148	NA	8.48416	4	1	NA	3	1.36054	3.003	NA	6.62252
Abcb9	34.1651	NA	28.2326	5.9325	10.2475	NA	12.334	7.36042	4	NA	4	NA	1.19976	NA	1.74749	NA
Abcc1	30.7034	NA	6.73323	23.9701	5.17327	NA	1.46789	18.2978	39	NA	11	28	6.57119	NA	2.39808	21.374
Abcc10	29.6609	NA	29.6609	NA	5.19546	NA	6.52748	NA	7	NA	7	NA	1.22613	NA	1.54049	NA
Abcc4	20.8635	NA	5.9445	14.919	3.53919	NA	1.51529	9.09142	9	NA	4	5	1.52672	NA	1.01963	3.04692
Abcc5	17.2255	NA	9.71877	7.50669	2.78009	NA	2.23574	4.54951	16	NA	10	6	2.58231	NA	2.30044	3.63636
Abcd1	8.74672	NA	8.74672	NA	2.57181	NA	3.956	NA	3	NA	3	NA	0.882094	NA	1.35685	NA
Abcd3	17.3812	NA	8.03772	9.34353	5.11364	NA	4.05945	7.06772	24	NA	9	15	7.0609	NA	4.54545	11.3464
Abcd4	19.6009	NA	1.37925	18.2216	7.75657	NA	0.757413	32.5386	9	NA	2	7	3.56154	NA	1.0983	12.5
Abce1	11.5359	2.27249	1.82	7.44338	3.02541	10.0999	1.01111	4.16296	12	1	2	9	3.14713	4.44444	1.11111	5.03356
Abcf1	23.5209	3.73993	3.86185	15.9191	7.46695	116.873	1.53614	26.3562	16	NA	4	12	5.07937	NA	1.59109	19.8675
Abcf2	10.6903	0.923854	3.96687	5.79954	4.15479	5.73822	2.10221	11.0467	8	1	3	4	3.10921	6.21118	1.58983	7.61905
Abcf3	3.21896	NA	NA	3.21896	0.979002	NA	NA	2.9586	2	NA	NA	2	0.608273	NA	NA	1.83824
Abcg2	2.56319	NA	2.56319	NA	1.02898	NA	1.29847	NA	3	NA	3	NA	1.20434	NA	1.51976	NA
Abhd10	16.3603	NA	11.098	5.26226	5.74448	NA	12.4139	2.78426	4	NA	2	2	1.40449	NA	2.23714	1.0582
Abhd11	21.27	9.85674	2.88478	8.5285	13.6609	16.7347	3.55269	54.6699	8	1	3	4	5.13809	1.69779	3.69458	25.641
Abhd12	4.97789	NA	NA	4.97789	2.5307	NA	NA	8.49469	5	NA	NA	5	2.54194	NA	NA	8.53242
Abhd13	96.6245	NA	65.3713	31.2533	18.6534	NA	64.4687	8.36543	30	NA	18	12	5.79151	NA	17.7515	3.21199
Abhd14a	5.69904	NA	1.46511	4.23393	3.97422	NA	1.8291	24.7598	4	NA	2	2	2.7894	NA	2.49688	11.6959
Abhd16a	5.88083	2.03705	2.96979	0.873986	3.02356	59.9132	1.7709	3.73498	7	1	5	1	3.59897	29.4118	2.98151	4.2735
Abhd17a	8.38495	3.54491	2.20918	2.63085	5.69243	10.0995	2.36783	13.9198	7	1	3	3	4.75221	2.849	3.21543	15.873
Abhd17b	35.9939	NA	20.0679	15.926	14.543	NA	23.1463	12.0652	15	NA	7	8	6.06061	NA	8.07382	6.06061
Abhd17c	40.2545	NA	6.35951	33.895	17.9868	NA	6.60385	27.6468	25	NA	7	18	11.1707	NA	7.26895	14.6819
Abhd2	8.5466	NA	1.65059	6.89601	2.94406	NA	1.29154	4.77233	7	NA	2	5	2.4113	NA	1.56495	3.46021
Abhd4	19.3003	NA	2.98418	16.3162	7.02086	NA	2.92854	12.4361	16	NA	5	11	5.8203	NA	4.90677	8.38415
Abhd5	21.4196	NA	12.4552	8.96444	6.8042	NA	11.7947	4.66655	11	NA	6	5	3.49428	NA	5.68182	2.60281
Abhd6	30.3261	NA	NA	30.3261	15.0278	NA	NA	33.2888	5	NA	1	4	2.4777	NA	0.98912	4.39078
Abhd8	24.5322	NA	10.0323	14.5	12.3588	NA	7.6002	30.0206	3	NA	2	1	1.51134	NA	1.51515	2.07039
Abi1	18.2221	NA	9.87503	8.34709	5.19889	NA	6.82921	4.43287	22	NA	16	6	6.27675	NA	11.065	3.1864
Abi2	42.4463	NA	5.82348	36.6228	7.10517	NA	3.77658	8.62118	11	NA	2	9	1.84131	NA	1.29702	2.11864
Abl1	192.371	74.0969	66.9827	51.2917	24.1339	28.067	23.3552	20.8249	77	17	30	30	9.66002	6.43939	10.4603	12.1803
Abl2	130.454	NA	110.303	20.1505	12.176	NA	31.0801	2.91909	55	NA	41	14	5.13347	NA	11.5526	2.0281
Ablim1	58.1363	NA	1.34214	56.7942	8.03765	NA	0.525504	14.342	35	NA	1	34	4.83893	NA	0.391543	8.58586
Ablim3	13.5229	NA	NA	13.5229	2.96425	NA	NA	7.10984	3	NA	NA	3	0.657606	NA	NA	1.57729
Abr	34.4292	NA	11.5044	22.9247	5.70397	NA	4.34786	9.66472	46	NA	20	26	7.62094	NA	7.55858	10.9612
Abracl	8.9296	NA	NA	8.9296	11.0242	NA	NA	24.0043	8	NA	NA	8	9.87654	NA	NA	21.5054
Abt1	25.9415	NA	12.0504	13.8911	5.82171	NA	14.877	3.84583	10	NA	3	7	2.24417	NA	3.7037	1.93798
Abtb1	25.6734	NA	6.71267	18.9607	13.6561	NA	4.67131	57.1106	9	NA	5	4	4.78723	NA	3.47947	12.0482
Abtb2	39.5494	4.68666	14.9792	19.8835	8.67691	11.239	4.87129	18.6524	19	2	7	10	4.16849	4.79616	2.27642	9.38086
Acaa1a	3.15345	NA	NA	3.15345	1.79377	NA	NA	12.0361	3	NA	NA	3	1.70648	NA	NA	11.4504
Acaa2	6.91833	NA	4.73717	2.18116	4.61222	NA	3.96748	8.13866	17	NA	13	4	11.3333	NA	10.8878	14.9254
Acaca	17.0467	NA	NA	17.0467	1.88737	NA	NA	8.66194	4	NA	NA	4	0.44287	NA	NA	2.03252
Acad11	62.5611	3.57673	42.9686	16.0158	18.6861	61.6678	18.3627	16.8587	37	1	26	10	11.0514	17.2414	11.1111	10.5263
Acad8	8.08503	NA	0.624346	7.46068	2.82298	NA	0.502694	4.75506	7	NA	1	6	2.44413	NA	0.805153	3.82409
Acad9	14.9669	NA	2.20065	12.7662	3.82491	NA	1.1718	6.62836	10	NA	4	6	2.55558	NA	2.12993	3.11526
Acadl	3.0157	NA	1.59924	1.41646	1.5481	NA	1.23685	2.3806	3	NA	2	1	1.54004	NA	1.54679	1.68067
Acadm	9.39884	NA	0.673664	8.72518	4.55812	NA	0.53212	15.0955	6	NA	2	4	2.9098	NA	1.57978	6.92042
Acads	5.84161	NA	0.229861	5.61175	3.12385	NA	0.185522	10.1113	3	NA	1	2	1.60428	NA	0.807103	3.6036
Acadsb	7.02357	NA	NA	7.02357	2.09784	NA	NA	3.68885	3	NA	NA	3	0.896057	NA	NA	1.57563
Acadvl	1.40146	NA	0.794481	0.606977	0.64052	NA	0.403085	5.37147	2	NA	1	1	0.914077	NA	0.507357	8.84956
Acap3	22.1785	8.07873	2.42265	11.6771	5.14344	15.536	0.968673	9.04504	14	1	5	8	3.24675	1.92308	1.9992	6.19675
Acat1	11.4968	NA	2.92546	8.57139	3.40849	NA	2.29448	4.23697	10	NA	4	6	2.96472	NA	3.13725	2.96589
Acat2	4.50984	NA	NA	4.50984	2.17237	NA	NA	5.49981	2	NA	NA	2	0.963391	NA	NA	2.43902
Acbd3	37.2994	NA	27.1433	10.1561	10.746	NA	17.2011	5.53766	10	NA	4	6	2.88101	NA	2.53485	3.27154
Acbd4	14.3853	NA	NA	14.3853	6.92934	NA	NA	26.7385	4	NA	NA	4	1.92678	NA	NA	7.43494
Acbd5	21.7175	6.14894	1.15745	14.4111	5.70163	16.3102	0.80546	7.22363	7	2	1	4	1.83775	5.30504	0.695894	2.00501
Acbd6	6.12209	0.914177	1.71128	3.49663	3.15247	1.76482	1.87025	6.8696	4	1	2	1	2.05973	1.9305	2.18579	1.96464
Accs	50.2928	NA	0.669238	49.6236	12.0549	NA	0.458069	21.9186	6	NA	1	5	1.43816	NA	0.684463	2.20848
Acd	1.66859	NA	1.66859	NA	1.17094	NA	1.3338	NA	1	NA	1	NA	0.701754	NA	0.799361	NA
Acer2	3.72889	NA	NA	3.72889	0.799333	NA	NA	0.996229	1	NA	NA	1	0.214362	NA	NA	0.267165
Acer3	11.7232	NA	1.36699	10.3562	2.8889	NA	1.70024	3.25973	8	NA	2	6	1.97141	NA	2.48756	1.88857
Acin1	37.2335	7.54174	22.4417	7.25006	7.49618	19.8991	5.58113	12.7867	30	NA	22	8	6.03986	NA	5.47128	14.1093
Ackr3	53.5534	1.19345	28.7338	23.6262	23.0933	2.86198	26.3855	29.0605	35	2	25	8	15.0927	4.79616	22.9568	9.8401
Acly	11.4983	NA	9.55684	1.9415	2.59732	NA	2.89076	2.17657	18	NA	16	2	4.06596	NA	4.83969	2.24215
Acn9	9.24425	NA	1.74369	7.50056	16.8077	NA	4.61294	46.0157	2	NA	1	1	3.63636	NA	2.6455	6.13497
Aco1	10.3285	NA	1.73868	8.58978	2.3914	NA	0.651189	6.40073	11	NA	4	7	2.54689	NA	1.49813	5.2161
Aco2	18.5513	NA	10.1225	8.42884	6.70208	NA	4.32032	22.4769	15	NA	9	6	5.41908	NA	3.84123	16
Acot1	19.8287	NA	16.9966	2.83209	12.727	NA	13.4894	9.76584	5	NA	4	1	3.20924	NA	3.1746	3.44828
Acot10	1.46826	NA	1.46826	NA	0.955277	NA	1.11232	NA	2	NA	2	NA	1.30124	NA	1.51515	NA
Acot13	4.78211	0.803306	2.32522	1.65359	6.97101	4.38965	5.49698	20.6698	5	1	3	1	7.28863	5.46448	7.0922	12.5
Acot2	7.04364	NA	7.04364	NA	3.20457	NA	5.17154	NA	1	NA	1	NA	0.454959	NA	0.734214	NA
Acot6	21.9502	NA	21.9502	NA	12.0473	NA	17.4208	NA	1	NA	1	NA	0.548847	NA	0.793651	NA
Acot8	3.86587	NA	NA	3.86587	3.35871	NA	NA	31.1764	1	NA	NA	1	0.86881	NA	NA	8.06452
Acot9	4.79732	NA	3.13478	1.66253	3.09904	NA	2.37484	22.7744	3	NA	3	NA	1.93798	NA	2.27273	NA
Acox1	20.3864	NA	5.79322	14.5931	4.90883	NA	2.69829	8.76464	14	NA	4	10	3.37106	NA	1.86306	6.00601
Acox3	44.0425	NA	NA	44.0425	11.1331	NA	NA	26.4202	7	NA	NA	7	1.76946	NA	NA	4.19916
Acp2	52.7752	NA	NA	52.7752	11.3422	NA	NA	15.7163	11	NA	NA	11	2.36407	NA	NA	3.27576
Acp6	3.89932	2.28104	1.61828	NA	2.22057	5.83387	1.28741	NA	3	1	2	NA	1.70843	2.55754	1.59109	NA
Acpp	17.5617	NA	1.43952	16.1221	2.94807	NA	1.13796	3.48286	8	NA	2	6	1.34296	NA	1.58103	1.29618
Acrbp	8.68315	NA	4.81983	3.86331	4.03117	NA	2.94072	8.94285	2	NA	2	NA	0.928505	NA	1.22026	NA
Acsbg1	3.75118	NA	2.41201	1.33917	1.35178	NA	1.11358	3.39891	5	NA	3	2	1.8018	NA	1.38504	5.07614
Acsf3	36.1629	9.16545	24.347	2.65037	16.3855	83.3223	13.8967	7.68223	5	1	3	1	2.26552	9.09091	1.71233	2.89855
Acsl1	50.4756	0.775718	4.52625	45.1736	12.9724	3.51004	2.15536	28.773	15	1	2	12	3.85505	4.52489	0.952381	7.64331
Acsl3	97.5906	7.11127	65.1624	25.3169	24.7065	13.2426	31.253	19.0639	23	2	14	7	5.82278	3.72439	6.71463	5.27108
Acsl4	12.8578	NA	9.06216	3.79563	2.43519	NA	4.26655	1.41417	2	NA	1	1	0.378788	NA	0.47081	0.372578
Acsl5	5.06183	NA	2.92968	2.13215	1.60642	NA	1.42772	7.83877	8	NA	5	3	2.53888	NA	2.43665	11.0294
Acsm3	3.0378	NA	NA	3.0378	1.06254	NA	NA	5.66755	3	NA	NA	3	1.04932	NA	NA	5.59701
Acss1	3.68819	NA	NA	3.68819	1.02621	NA	NA	2.45552	1	NA	NA	1	0.278242	NA	NA	0.665779
Actb	26.0917	3.71543	9.13889	13.2374	13.8125	47.0308	8.10185	19.4097	36	2	23	11	19.0577	25.3165	20.3901	16.129
Actg1	0.88118	NA	0.88118	NA	0.465248	NA	0.781188	NA	NA	NA	NA	NA	NA	NA	NA	NA
Actl6a	6.17536	NA	5.46168	0.713683	3.13629	NA	4.23386	1.9341	9	NA	8	1	4.57085	NA	6.20155	2.71003
Actn1	16.2882	2.82289	7.04087	6.42443	4.3563	10.0817	2.62817	8.23645	15	1	11	3	4.01177	3.57143	4.10601	3.84615
Actn4	34.5274	1.07821	22.0993	11.3499	9.05994	11.1156	8.06838	11.641	61	NA	47	14	16.0063	NA	17.1595	14.359
Actr10	8.68002	0.747184	7.18452	0.748322	2.15867	7.62432	5.72928	0.280375	9	1	7	1	2.23825	10.2041	5.58214	0.374672
Actr1a	25.8702	NA	4.71762	21.1526	9.43479	NA	4.1712	13.6205	21	NA	8	13	7.65864	NA	7.07339	8.3709
Actr1b	11.1008	NA	2.91138	8.18944	5.34464	NA	2.57417	9.37007	14	NA	4	10	6.74049	NA	3.53669	11.4416
Actr2	12.2853	NA	4.95288	7.33243	3.34841	NA	4.17964	3.07439	19	NA	7	12	5.17852	NA	5.90717	5.03145
Actr3	5.23799	NA	2.1063	3.13169	1.9075	NA	1.67565	2.87311	9	NA	3	6	3.27749	NA	2.38663	5.50459
Actr5	35.8637	11.9884	8.1608	15.7145	15.0878	52.351	4.46678	48.9548	9	1	2	6	3.78629	4.36681	1.09469	18.6916
Actr8	4.07765	NA	4.07765	NA	1.92251	NA	2.17474	NA	3	NA	3	NA	1.41443	NA	1.6	NA
Acvr1	45.3781	NA	10.4043	34.9738	13.7593	NA	6.80017	31.7655	17	NA	5	12	5.15464	NA	3.26797	10.8992
Acvr1b	35.6015	NA	5.34349	30.2581	10.8641	NA	3.52009	17.3997	24	NA	8	16	7.32377	NA	5.27009	9.20069
Acvr2a	81.7585	5.03937	18.6661	58.053	14.3916	7.60086	12.1051	16.7011	34	2	10	22	5.98486	3.01659	6.48508	6.32911
Acvr2b	9.93049	NA	5.65609	4.27441	5.83803	NA	3.51092	94.9868	5	NA	3	2	2.93945	NA	1.8622	44.4444
Acvrl1	21.6831	NA	NA	21.6831	5.72416	NA	NA	11.6639	6	NA	NA	6	1.58395	NA	NA	3.22754
Acy1	1.54015	NA	1.54015	NA	1.06511	NA	1.25522	NA	1	NA	1	NA	0.691563	NA	0.814996	NA
Acy3	1.99746	NA	NA	1.99746	1.32898	NA	NA	14.58	1	NA	NA	1	0.665336	NA	NA	7.29927
Acyp1	4.57193	2.12392	2.44801	NA	7.05545	15.8501	8.16003	NA	2	1	1	NA	3.08642	7.46269	3.33333	NA
Adal	9.35374	1.22064	5.02457	3.10853	3.43005	2.29875	4.72678	2.74363	4	1	1	2	1.46681	1.88324	0.940734	1.76523
Adam10	49.0295	NA	12.5233	36.5062	10.6841	NA	5.56592	17.0989	28	NA	14	14	6.10155	NA	6.22222	6.55738
Adam15	5.80553	NA	NA	5.80553	1.9423	NA	NA	21.4226	2	NA	NA	2	0.66912	NA	NA	7.38007
Adam17	35.7215	NA	10.4914	25.2302	7.89077	NA	5.74241	14.2785	15	NA	4	11	3.31345	NA	2.18938	6.22524
Adam1a	51.1946	2.91432	48.2803	NA	16.5571	6.24051	20.32	NA	5	1	4	NA	1.61708	2.14133	1.6835	NA
Adam8	11.508	NA	2.21036	9.29768	3.76326	NA	0.890916	17.2499	8	NA	3	5	2.61609	NA	1.20919	9.27644
Adam9	4.14155	NA	NA	4.14155	1.02539	NA	NA	3.17118	3	NA	NA	3	0.742758	NA	NA	2.29709
Adamts1	87.9829	2.43975	57.5391	28.004	18.0108	6.02407	19.7933	17.8029	73	3	43	27	14.9437	7.40741	14.7919	17.1647
Adamts10	9.18175	NA	4.482	4.69975	2.25873	NA	1.35204	7.99277	4	NA	2	2	0.98401	NA	0.603318	3.40136
Adamts14	53.1293	NA	23.985	29.1443	10.2408	NA	6.62387	21.3355	44	NA	26	18	8.48111	NA	7.18034	13.1772
Adamts17	59.7784	NA	4.49793	55.2805	9.91514	NA	1.33509	21.6024	19	NA	1	18	3.15143	NA	0.296824	7.034
Adamts18	62.8016	NA	NA	62.8016	12.9354	NA	NA	75.4827	5	NA	NA	5	1.02987	NA	NA	6.00962
Adamts6	15.8152	NA	15.8152	NA	3.2798	NA	4.71532	NA	1	NA	1	NA	0.207383	NA	0.298151	NA
Adamts9	30.9914	NA	4.09489	26.8966	5.13443	NA	1.01034	14.2839	23	NA	4	19	3.81047	NA	0.986923	10.0903
Adamtsl1	5.80505	NA	5.80505	NA	0.740535	NA	1.1032	NA	1	NA	1	NA	0.127567	NA	0.190042	NA
Adamtsl4	2.95244	NA	2.95244	NA	0.765674	NA	0.949033	NA	1	NA	1	NA	0.259336	NA	0.32144	NA
Adar	91.604	15.7128	37.912	37.9792	15.1687	16.7513	13.4392	16.6576	32	6	13	13	5.29889	6.39659	4.60829	5.70175
Adarb1	11.2232	NA	NA	11.2232	1.7041	NA	NA	2.76774	1	NA	NA	1	0.151837	NA	NA	0.246609
Adat1	27.3716	NA	5.44895	21.9226	8.66463	NA	3.63263	14.6346	3	NA	1	2	0.949668	NA	0.666667	1.33511
Adat3	74.5892	2.53061	45.5148	26.5439	52.8627	29.4257	43.3474	96.5231	7	1	4	2	4.96102	11.6279	3.80952	7.27273
Adck1	7.42021	NA	3.8233	3.59691	2.87382	NA	2.42288	6.73578	3	NA	2	1	1.16189	NA	1.26743	1.87266
Adck2	37.4514	6.82471	25.9063	4.72042	10.5825	16.0581	13.9732	3.74637	16	2	11	3	4.52105	4.70588	5.93312	2.38095
Adck3	8.77675	NA	NA	8.77675	2.15328	NA	NA	4.54519	3	NA	NA	3	0.736016	NA	NA	1.5536
Adck4	9.41951	NA	6.59702	2.82249	4.30115	NA	4.11799	6.65682	4	NA	2	2	1.82648	NA	1.24844	4.71698
Adck5	1.21436	NA	1.21436	NA	0.597032	NA	0.694318	NA	1	NA	1	NA	0.491642	NA	0.571755	NA
Adcy3	38.2724	1.15828	35.887	1.22715	8.09141	2.08699	10.4383	1.66505	14	1	12	1	2.95983	1.8018	3.4904	1.35685
Adcy6	76.7299	NA	27.1434	49.5865	12.7353	NA	7.73978	20.9757	29	NA	9	20	4.81328	NA	2.5663	8.46024
Adcy7	32.3458	NA	NA	32.3458	5.10992	NA	NA	15.0867	3	NA	NA	3	0.473934	NA	NA	1.39925
Adcy9	137.122	10.0908	112.503	14.528	17.49	8.04688	31.4782	4.82339	17	NA	12	5	2.16837	NA	3.35758	1.66003
Add1	30.3571	NA	11.3108	19.0463	7.50115	NA	5.67812	10.3795	34	NA	14	20	8.40128	NA	7.02811	10.8992
Add3	35.9559	0.584187	4.79942	30.5723	7.3877	0.822799	2.26281	15.0159	31	1	5	25	6.36943	1.40845	2.35738	12.279
Adh5	4.43675	1.87682	1.23799	1.32194	2.62996	3.56811	1.60569	3.38959	7	2	3	2	4.14938	3.80228	3.89105	5.12821
Adi1	4.12367	NA	NA	4.12367	2.46189	NA	NA	3.78666	3	NA	NA	3	1.79104	NA	NA	2.75482
Adipor1	18.9713	NA	3.43167	15.5396	9.37317	NA	3.04226	22.752	22	NA	9	13	10.8696	NA	7.97872	19.0337
Adipor2	33.9426	NA	4.39241	29.5502	8.56488	NA	3.7833	11.151	25	NA	3	22	6.30835	NA	2.58398	8.30189
Adk	2.29046	NA	1.05077	1.23969	1.17339	NA	0.955246	1.96464	3	NA	2	1	1.53689	NA	1.81818	1.58479
Adm	58.5546	NA	6.67035	51.8842	42.4001	NA	12.0186	79.6993	9	NA	3	6	6.51702	NA	5.40541	9.21659
Adnp	134.677	NA	113.243	21.4342	27.4682	NA	34.0374	19.8098	94	NA	74	20	19.1719	NA	22.2423	18.4843
Adnp2	169.665	NA	164.99	4.67441	40.5121	NA	47.167	8.34716	65	NA	63	2	15.5205	NA	18.0103	3.57143
Ado	52.8272	NA	13.9335	38.8937	11.8846	NA	18.072	11.1379	20	NA	5	15	4.49944	NA	6.48508	4.29553
Adora2b	74.8689	NA	25.2772	49.5917	40.6014	NA	25.3025	68.2142	6	NA	2	4	3.2538	NA	2.002	5.50206
Adpgk	62.9296	NA	28.4339	34.4958	25.4673	NA	19.0703	37.5771	17	NA	7	10	6.87981	NA	4.69484	10.8932
Adprh	18.287	NA	17.6056	0.681391	11.5521	NA	16.1668	2.34155	11	NA	10	1	6.94883	NA	9.18274	3.43643
Adprhl2	27.641	NA	12.6559	14.9851	20.2054	NA	11.371	67.5003	12	NA	7	5	8.77193	NA	6.28931	22.5225
Adprm	51.3495	NA	46.7537	4.59578	34.4165	NA	45.7025	17.6083	7	NA	6	1	4.69169	NA	5.8651	3.83142
Adra2a	4.59316	NA	4.59316	NA	1.20841	NA	3.28552	NA	1	NA	1	NA	0.263089	NA	0.715308	NA
Adrb1	39.417	NA	25.0308	14.3863	15.8238	NA	17.8664	13.1984	4	NA	2	2	1.60578	NA	1.42755	1.83486
Adrb2	89.3434	0.865989	54.5538	33.9236	39.3757	3.78161	43.4	43.3252	42	1	29	12	18.5104	4.36681	23.0708	15.3257
Adrbk1	6.77936	NA	3.65152	3.12784	1.96446	NA	1.87835	2.84091	6	NA	4	2	1.73863	NA	2.05761	1.81653
Adsl	1.4105	NA	1.4105	NA	0.379985	NA	0.969419	NA	2	NA	2	NA	0.538793	NA	1.37457	NA
Adss	22.0861	NA	5.43103	16.655	8.65102	NA	3.96136	15.6092	18	NA	7	11	7.05053	NA	5.10576	10.3093
Adtrp	3.72713	NA	NA	3.72713	1.45251	NA	NA	2.31499	1	NA	NA	1	0.389712	NA	NA	0.621118
Aebp2	42.6292	1.83037	4.27166	36.5272	6.44335	4.37888	2.84209	7.78002	29	NA	6	23	4.38331	NA	3.99202	4.89883
Aen	29.5638	NA	29.5638	NA	11.4588	NA	31.2184	NA	6	NA	6	NA	2.32558	NA	6.3358	NA
Aes	10.7965	NA	1.00809	9.78843	7.34457	NA	1.69712	14.4372	16	NA	6	10	10.8844	NA	10.101	14.7493
Afap1	9.30629	NA	3.90714	5.39914	1.40642	NA	1.77921	1.28643	5	NA	1	4	0.755629	NA	0.455373	0.953062
Afap1l1	29.8973	NA	0.638535	29.2587	8.78556	NA	0.276782	28.5451	4	NA	1	3	1.17543	NA	0.433463	2.92683
Afap1l2	11.7351	NA	0.695833	11.0393	2.87978	NA	0.294345	10.7386	3	NA	1	2	0.736196	NA	0.423012	1.94553
Aff1	135.032	NA	68.5486	66.4829	15.8935	NA	18.5367	14.7773	89	NA	39	50	10.4755	NA	10.5462	11.1136
Aff4	93.4113	NA	66.0418	27.3695	9.1895	NA	18.9612	4.33405	64	NA	35	29	6.29611	NA	10.0488	4.59224
Afg3l1	11.0717	NA	3.76264	7.30907	2.59412	NA	1.58761	3.95085	4	NA	2	2	0.937207	NA	0.843882	1.08108
Afg3l2	40.4397	NA	4.86679	35.5729	13.2242	NA	2.02025	69.2079	16	NA	4	12	5.23218	NA	1.66044	23.3463
Afmid	34.9137	NA	NA	34.9137	14.9716	NA	NA	25.2449	6	NA	NA	6	2.5729	NA	NA	4.33839
Aftph	91.2584	NA	85.7612	5.49721	22.5608	NA	32.0723	5.05258	45	NA	42	3	11.1248	NA	15.7068	2.75735
Aga	1.827	NA	0.794637	1.03237	1.41628	NA	0.76334	7.071	2	NA	1	1	1.55039	NA	0.960615	6.84932
Agap1	62.1231	NA	11.6378	50.4853	6.48399	NA	4.52129	7.90314	14	NA	4	10	1.46123	NA	1.554	1.56544
Agap3	37.0531	NA	15.9001	21.1531	8.9804	NA	5.68672	16.2716	30	NA	20	10	7.27096	NA	7.15308	7.69231
Agbl4	20.8429	NA	4.03744	16.8054	9.987	NA	2.6685	42.0136	4	NA	2	2	1.91663	NA	1.32188	5
Agbl5	26.2103	NA	24.0846	2.12574	6.41938	NA	9.22074	1.67513	6	NA	5	1	1.46951	NA	1.91424	0.788022
Ager	0.490858	NA	NA	0.490858	0.310277	NA	NA	3.66312	1	NA	NA	1	0.632111	NA	NA	7.46269
Agfg1	14.3263	NA	3.13362	11.1927	4.56689	NA	1.86525	9.19696	14	NA	4	10	4.46286	NA	2.38095	8.21693
Agfg2	9.14587	NA	0.473552	8.67232	2.96655	NA	0.304339	6.13752	6	NA	1	5	1.94616	NA	0.642674	3.53857
Aggf1	17.8203	NA	13.5262	4.29406	5.47643	NA	6.33251	5.24305	10	NA	8	2	3.07314	NA	3.74532	2.442
Agk	0.625892	NA	NA	0.625892	0.2813	NA	NA	0.695435	1	NA	NA	1	0.449438	NA	NA	1.11111
Agl	2.26811	NA	0.702385	1.56572	0.235648	NA	0.152726	0.324906	2	NA	1	1	0.207792	NA	0.217439	0.207512
Ago1	20.3376	NA	3.1315	17.2061	2.87905	NA	1.21659	3.8321	26	NA	5	21	3.68063	NA	1.9425	4.67706
Ago2	43.0527	NA	4.33481	38.7179	5.36082	NA	1.67821	7.32877	23	NA	4	19	2.8639	NA	1.54859	3.59644
Ago3	1.81708	NA	NA	1.81708	0.237994	NA	NA	0.378875	2	NA	NA	2	0.261952	NA	NA	0.417014
Ago4	68.6008	NA	8.53171	60.0691	10.52	NA	3.29919	16.3231	28	NA	8	20	4.29382	NA	3.09358	5.43478
Agpat1	24.133	1.44711	1.04509	21.6408	10.7115	3.77837	1.21805	21.3842	10	1	1	8	4.43853	2.61097	1.1655	7.90514
Agpat2	18.5653	NA	3.63074	14.9345	11.795	NA	4.3378	28.1784	8	NA	2	6	5.08259	NA	2.38949	11.3208
Agpat3	21.7955	NA	1.07697	20.7185	6.33774	NA	0.952231	9.75447	12	NA	2	10	3.48939	NA	1.76835	4.7081
Agpat4	5.44565	1.26576	NA	4.17989	2.85113	5.97058	NA	7.45078	2	1	1	NA	1.04712	4.71698	0.879507	NA
Agpat5	3.26998	NA	3.26998	NA	0.854003	NA	2.97812	NA	4	NA	4	NA	1.04466	NA	3.64299	NA
Agpat6	74.4158	55.2079	4.04234	15.1656	18.8681	57.092	2.94846	9.44306	27	17	3	7	6.84584	17.5801	2.18818	4.35866
Agps	3.36976	NA	NA	3.36976	0.457911	NA	NA	0.634966	3	NA	NA	3	0.407664	NA	NA	0.565291
Agr3	0.98056	NA	0.98056	NA	1.19726	NA	1.969	NA	1	NA	1	NA	1.221	NA	2.00803	NA
Agrn	65.6008	NA	42.3915	23.2092	8.8902	NA	6.94374	19.2448	124	NA	94	30	16.8044	NA	15.3972	24.8756
Agrp	0.483968	NA	0.483968	NA	0.560797	NA	1.22214	NA	1	NA	1	NA	1.15875	NA	2.52525	NA
Agtpbp1	13.5533	NA	13.5533	NA	2.23137	NA	4.51027	NA	5	NA	5	NA	0.823181	NA	1.66389	NA
Agtr1a	24.1904	NA	24.1904	NA	10.5912	NA	22.3985	NA	2	NA	2	NA	0.875657	NA	1.85185	NA
Agtrap	7.71683	NA	2.11849	5.59833	1.91532	NA	4.35904	1.63598	4	NA	1	3	0.992802	NA	2.05761	0.87668
Ahctf1	113.813	NA	83.102	30.711	12.8879	NA	12.3443	21.4912	61	NA	49	12	6.90748	NA	7.27867	8.39748
Ahcyl1	9.77704	NA	3.62159	6.15545	2.53883	NA	2.27344	3.09786	14	NA	5	9	3.63542	NA	3.13873	4.52944
Ahcyl2	3.73898	NA	NA	3.73898	0.694333	NA	NA	1.14552	6	NA	NA	6	1.11421	NA	NA	1.83824
Ahdc1	202.641	0.555867	188.816	13.2695	30.694	0.85518	39.46	11.3706	81	1	71	9	12.269	1.53846	14.838	7.71208
Ahnak	410.962	2.3124	393.277	15.3725	22.0438	8.99766	22.9343	12.4172	306	2	291	13	16.4137	7.7821	16.9699	10.5008
Ahr	99.9268	1.68808	69.1391	29.0996	18.1883	4.61225	28.5935	10.7379	62	2	37	23	11.285	5.46448	15.3019	8.48708
Ahsa1	6.37363	NA	6.37363	NA	4.82851	NA	6.26709	NA	7	NA	7	NA	5.30303	NA	6.88299	NA
AI314180	5.64624	NA	4.25275	1.39349	0.956828	NA	0.770007	9.28996	7	NA	6	1	1.18624	NA	1.08637	6.66667
AI429214	7.69312	NA	1.84939	5.84373	3.92706	NA	2.09682	6.13837	2	NA	1	1	1.02093	NA	1.13379	1.05042
AI462493	22.5844	NA	4.54472	18.0397	27.1774	NA	16.8323	39.8227	7	NA	1	6	8.42359	NA	3.7037	13.245
AI464131	90.7179	NA	70.2774	20.4405	21.7288	NA	32.672	10.89	24	NA	17	7	5.7485	NA	7.9033	3.72936
AI597479	10.5605	NA	10.5605	NA	3.05483	NA	15.1081	NA	4	NA	4	NA	1.15707	NA	5.72246	NA
AI661453	126.343	NA	101.571	24.772	25.108	NA	28.0506	19.8972	67	NA	57	10	13.3148	NA	15.7415	8.03213
AI837181	66.9382	NA	18.8694	48.0689	43.3257	NA	34.5593	49.352	24	NA	4	20	15.534	NA	7.32601	20.5339
AI846148	7.72097	NA	6.07685	1.64412	2.13404	NA	5.23866	0.736285	7	NA	5	2	1.93477	NA	4.31034	0.895656
AI987944	5.42945	NA	NA	5.42945	1.85242	NA	NA	3.84522	1	NA	NA	1	0.34118	NA	NA	0.708215
Aida	17.6785	NA	NA	17.6785	5.36851	NA	NA	9.22678	5	NA	NA	5	1.51837	NA	NA	2.6096
Aifm1	1.22761	NA	1.22761	NA	0.518417	NA	0.623153	NA	1	NA	1	NA	0.422297	NA	0.507614	NA
Aifm2	14.6972	NA	NA	14.6972	4.23916	NA	NA	6.83271	3	NA	NA	3	0.865301	NA	NA	1.3947
Aig1	8.67024	NA	NA	8.67024	8.22603	NA	NA	44.9235	1	NA	NA	1	0.948767	NA	NA	5.18135
Aim1	140.032	11.9112	82.0691	46.0517	18.8824	15.31	16.1681	29.4825	90	5	51	34	12.1359	6.42674	10.0473	21.767
Aim1l	92.6041	NA	91.4886	1.11545	19.4506	NA	20.103	11.4995	43	NA	42	1	9.03172	NA	9.22874	10.3093
Aim2	29.5565	NA	24.948	4.60856	11.6502	NA	23.4253	4.52707	4	NA	2	2	1.57667	NA	1.87793	1.96464
Aimp1	2.69368	NA	0.67897	2.01471	2.40078	NA	0.707261	26.165	3	NA	2	1	2.6738	NA	2.08333	12.987
Aimp2	9.67609	NA	7.62657	2.04952	8.16548	NA	7.9196	20.9135	5	NA	4	1	4.21941	NA	4.15369	10.2041
Aip	1.12705	NA	1.12705	NA	0.537202	NA	1.135	NA	2	NA	2	NA	0.953289	NA	2.0141	NA
Airn	3.88236	NA	3.88236	NA	Inf	NA	Inf	NA	1	NA	1	NA	Inf	NA	Inf	NA
Ajuba	91.947	12.6045	42.6473	36.6953	26.2481	31.7494	25.9412	25.0994	73	5	38	30	20.8393	12.5945	23.1144	20.5198
Ak1	1.17388	NA	NA	1.17388	0.496357	NA	NA	0.870188	1	NA	NA	1	0.422833	NA	NA	0.74129
AK129341	8.25215	NA	8.25215	NA	2.26272	NA	2.49159	NA	1	NA	1	NA	0.274198	NA	0.301932	NA
Ak2	15.5631	NA	2.07208	13.4911	6.84094	NA	2.85804	9.43431	13	NA	6	7	5.71429	NA	8.27586	4.8951
Ak3	12.8245	NA	1.57458	11.2499	4.66175	NA	2.30202	5.64186	13	NA	2	11	4.72555	NA	2.92398	5.51655
Ak4	4.90245	NA	NA	4.90245	0.949718	NA	NA	1.19455	1	NA	NA	1	0.193723	NA	NA	0.243665
Ak6	10.2136	NA	6.86718	3.34637	10.3167	NA	13.2316	8.45043	4	NA	3	1	4.0404	NA	5.78035	2.52525
Akap1	59.388	NA	49.8043	9.58374	15.1849	NA	19.349	9.95196	16	NA	13	3	4.09103	NA	5.05051	3.11526
Akap10	36.2355	NA	34.3518	1.88373	9.34146	NA	17.2709	1.10224	14	NA	12	2	3.60918	NA	6.03318	1.17028
Akap11	138.627	NA	130.863	7.76464	14.7225	NA	23.0189	2.19961	37	NA	30	7	3.92948	NA	5.27704	1.983
Akap13	99.1314	NA	75.9999	23.1315	7.90332	NA	9.12254	5.80318	45	NA	32	13	3.58766	NA	3.84108	3.26141
Akap17b	15.1588	NA	5.53428	9.62454	2.46365	NA	1.92163	3.44966	2	NA	1	1	0.325045	NA	0.347222	0.358423
Akap2	130.999	1.30474	68.2897	61.4049	19.0711	7.67495	26.2048	15.0024	34	1	18	15	4.94977	5.88235	6.90714	3.66479
Akap5	20.1208	NA	20.1208	NA	3.00985	NA	8.99055	NA	1	NA	1	NA	0.149589	NA	0.446828	NA
Akap7	18.0713	NA	NA	18.0713	5.78652	NA	NA	9.21065	2	NA	NA	2	0.64041	NA	NA	1.01937
Akap8	53.9319	1.41653	35.3612	17.1541	14.5959	28.3307	17.1324	10.8502	41	1	27	13	11.0961	20	13.0814	8.22264
Akap8l	1.24927	NA	1.24927	NA	0.602931	NA	0.648636	NA	1	NA	1	NA	0.482625	NA	0.519211	NA
Akap9	114.59	NA	113.858	0.731363	9.46631	NA	10.0404	1.43969	44	NA	43	1	3.63486	NA	3.79189	1.9685
Akip1	17.8213	NA	1.5847	16.2366	18.3159	NA	2.47997	56.3772	2	NA	1	1	2.0555	NA	1.56495	3.47222
Akirin1	1.48638	NA	NA	1.48638	0.627165	NA	NA	0.89595	1	NA	NA	1	0.421941	NA	NA	0.602773
Akirin2	8.74698	2.63307	3.14727	2.96665	5.08841	6.12342	5.19351	4.34355	8	2	3	3	4.65387	4.65116	4.9505	4.39239
Akna	7.50056	NA	7.50056	NA	1.36996	NA	1.77949	NA	1	NA	1	NA	0.182648	NA	0.237248	NA
Akr1a1	11.7447	5.66513	4.14666	1.93291	8.30601	16.5647	4.23994	20.5628	16	3	11	2	11.3154	8.77193	11.2474	21.2766
Akr1b8	5.39488	NA	NA	5.39488	4.13718	NA	NA	18.8632	1	NA	NA	1	0.766871	NA	NA	3.4965
Akr1e1	0.813583	NA	NA	0.813583	0.474946	NA	NA	1.06212	1	NA	NA	1	0.583771	NA	NA	1.30548
Akr7a5	9.27438	NA	4.74558	4.52881	5.62766	NA	4.29853	8.49682	4	NA	3	1	2.42718	NA	2.71739	1.87617
Akt1	27.2679	0.969268	11.8099	14.4887	10.1368	2.61964	8.18429	16.5208	30	NA	19	11	11.1524	NA	13.167	12.5428
Akt1s1	28.8095	12.1739	6.33978	10.2959	12.7815	16.838	7.50269	15.0086	14	3	4	7	6.21118	4.14938	4.73373	10.2041
Akt2	14.2553	NA	4.46435	9.79097	4.39843	NA	3.08738	7.46263	11	NA	5	6	3.39401	NA	3.45781	4.57317
Aktip	6.04884	NA	NA	6.04884	2.79392	NA	NA	5.64257	1	NA	NA	1	0.461894	NA	NA	0.932836
Alad	2.68776	NA	1.18147	1.50629	0.58417	NA	1.1898	0.461346	2	NA	1	1	0.434688	NA	1.00705	0.306279
Alas1	2.4361	NA	2.4361	NA	0.7475	NA	1.26288	NA	2	NA	2	NA	0.613685	NA	1.03681	NA
Alcam	40.5351	7.67341	8.28724	24.5745	8.17406	14.4237	4.73016	9.18673	37	4	11	22	7.46118	7.5188	6.27854	8.2243
Aldh16a1	1.80374	NA	0.787475	1.01627	0.702666	NA	0.326889	10.0621	2	NA	1	1	0.77912	NA	0.41511	9.90099
Aldh18a1	33.5719	NA	3.31756	30.2543	9.51854	NA	1.38926	33.9555	16	NA	4	12	4.53643	NA	1.67504	13.468
Aldh1b1	11.5717	NA	NA	11.5717	5.02681	NA	NA	19.7807	2	NA	NA	2	0.86881	NA	NA	3.4188
Aldh1l1	5.54101	NA	0.827166	4.71385	1.7967	NA	0.30534	20.5845	2	NA	1	1	0.648508	NA	0.36914	4.36681
Aldh2	13.3695	NA	7.61967	5.7498	6.05776	NA	4.8844	18.9138	20	NA	13	7	9.06208	NA	8.33333	23.0263
Aldh3a2	11.6024	NA	0.929241	10.6732	3.70567	NA	0.638653	6.8638	7	NA	1	6	2.23571	NA	0.687285	3.85852
Aldh3b2	1.63763	NA	NA	1.63763	0.75781	NA	NA	3.46221	1	NA	NA	1	0.462749	NA	NA	2.11416
Aldh4a1	25.6199	NA	5.04831	20.5716	7.63633	NA	2.98894	14.4768	23	NA	6	17	6.85544	NA	3.5524	11.9634
Aldh5a1	1.86066	NA	1.86066	NA	0.329495	NA	1.18363	NA	1	NA	1	NA	0.177085	NA	0.636132	NA
Aldh6a1	0.751532	NA	0.751532	NA	0.224808	NA	0.467371	NA	1	NA	1	NA	0.299133	NA	0.621891	NA
Aldh7a1	1.95645	NA	NA	1.95645	0.611582	NA	NA	1.6076	1	NA	NA	1	0.312598	NA	NA	0.821693
Aldh9a1	2.51027	NA	0.969401	1.54087	0.886083	NA	0.622608	1.49454	3	NA	1	2	1.05895	NA	0.642261	1.93986
Aldoa	3.02507	0.596838	2.42823	NA	1.65848	1.48099	1.96459	NA	6	1	5	NA	3.28947	2.48139	4.04531	NA
Alg1	11.6128	NA	NA	11.6128	6.60196	NA	NA	41.3268	4	NA	NA	4	2.27402	NA	NA	14.2349
Alg10b	16.2273	NA	13.3036	2.92369	4.35399	NA	9.33589	1.34422	9	NA	6	3	2.41481	NA	4.21053	1.37931
Alg11	36.5938	NA	35.8294	0.764386	7.37778	NA	24.2254	0.219967	9	NA	8	1	1.81452	NA	5.40906	0.28777
Alg12	10.3183	NA	6.70691	3.61141	4.78586	NA	4.5134	6.16281	4	NA	1	3	1.85529	NA	0.672948	5.11945
Alg14	3.64072	NA	NA	3.64072	4.00079	NA	NA	16.181	1	NA	NA	1	1.0989	NA	NA	4.44444
Alg2	18.3978	NA	10.4499	7.94791	6.02221	NA	8.37335	4.60481	9	NA	6	3	2.94599	NA	4.80769	1.73812
Alg3	4.10115	NA	NA	4.10115	2.878	NA	NA	42.2799	1	NA	NA	1	0.701754	NA	NA	10.3093
Alg5	13.6075	NA	0.934016	12.6734	9.25048	NA	0.957965	28.1008	4	NA	1	3	2.71924	NA	1.02564	6.65188
Alg8	21.9093	NA	8.65732	13.252	10.9492	NA	5.47585	33.213	7	NA	2	5	3.49825	NA	1.26502	12.5313
Alg9	46.7886	NA	2.64773	44.1408	16.8425	NA	1.44212	56.4461	8	NA	3	5	2.87977	NA	1.63399	6.39386
Alkbh1	10.9391	NA	9.42574	1.51341	5.61558	NA	8.05619	1.9835	7	NA	6	1	3.59343	NA	5.12821	1.31062
Alkbh4	27.1769	NA	22.6056	4.57136	15.8651	NA	34.8851	5.39075	6	NA	5	1	3.50263	NA	7.71605	1.17925
Alkbh5	27.7756	4.55806	14.346	8.87152	4.61006	6.15954	12.0758	2.16537	17	2	6	9	2.82158	2.7027	5.05051	2.19673
Alkbh6	3.37444	NA	NA	3.37444	3.57084	NA	NA	27.8879	2	NA	NA	2	2.1164	NA	NA	16.5289
Alkbh8	15.0837	NA	9.81061	5.27307	6.64772	NA	4.9176	21.3485	7	NA	4	3	3.08506	NA	2.00501	12.1457
Alms1	96.7744	NA	96.7744	NA	9.69295	NA	9.91948	NA	19	NA	19	NA	1.90304	NA	1.94752	NA
Alpk1	19.3288	NA	19.3288	NA	4.03104	NA	5.22966	NA	3	NA	3	NA	0.625652	NA	0.811688	NA
Als2	4.04751	NA	1.35668	2.69084	0.576241	NA	0.261856	1.84052	2	NA	1	1	0.284738	NA	0.193013	0.683995
Als2cl	81.4312	NA	NA	81.4312	15.5879	NA	NA	40.035	29	NA	1	28	5.5513	NA	0.349773	13.766
Alyref	3.5104	NA	1.44397	2.06643	3.10106	NA	1.88017	6.13184	4	NA	2	2	3.53357	NA	2.60417	5.93472
Alyref2	30.8925	NA	3.25488	27.6376	24.2675	NA	4.95416	63.2439	3	NA	1	2	2.35664	NA	1.52207	4.57666
Amacr	2.0113	NA	2.0113	NA	0.781087	NA	1.75506	NA	1	NA	1	NA	0.38835	NA	0.8726	NA
Ambra1	112.591	NA	75.4675	37.1238	21.2838	NA	19.3358	36.183	47	NA	33	14	8.88469	NA	8.45503	13.6452
Amd1	10.3329	NA	NA	10.3329	3.22299	NA	NA	5.52266	3	NA	NA	3	0.935745	NA	NA	1.60342
Amer1	237.166	NA	110.617	126.548	28.0073	NA	32.5441	26.3752	42	NA	18	24	4.95985	NA	5.29568	5.00208
Amfr	22.5758	NA	4.33553	18.2402	6.13805	NA	2.25809	11.5518	16	NA	8	8	4.35019	NA	4.16667	5.0665
Amigo1	114.086	3.0323	96.8267	14.2266	20.4235	6.23931	65.4677	3.92892	17	1	13	3	3.04332	2.05761	8.78972	0.8285
Ammecr1l	160.064	NA	26.9227	133.141	29.9017	NA	26.7621	40.0063	48	NA	10	38	8.96693	NA	9.94036	11.4183
Amotl1	63.1562	NA	35.3053	27.8508	7.05655	NA	12.1449	4.78125	43	NA	17	26	4.80447	NA	5.84795	4.46352
Amotl2	100.204	2.18201	24.7782	73.2438	23.9093	13.5529	10.6849	42.8076	49	1	19	29	11.6917	6.21118	8.19319	16.9492
Ampd2	5.22681	NA	1.47222	3.75459	1.33952	NA	0.584679	4.40163	4	NA	2	2	1.02512	NA	0.794281	2.34467
Ampd3	9.73264	NA	0.438659	9.29399	2.27877	NA	0.190638	6.20426	7	NA	1	6	1.63896	NA	0.434594	4.00534
Amt	2.86727	NA	2.86727	NA	2.16398	NA	2.36574	NA	1	NA	1	NA	0.754717	NA	0.825083	NA
Amz2	6.32136	NA	NA	6.32136	2.05106	NA	NA	4.41128	2	NA	NA	2	0.648929	NA	NA	1.39567
Anapc1	103.436	1.44471	11.5072	90.4836	11.5351	5.41092	1.9721	31.5824	43	2	16	25	4.79536	7.49064	2.74207	8.726
Anapc10	7.45692	NA	2.22544	5.23149	2.66129	NA	3.98823	2.42311	4	NA	2	2	1.42755	NA	3.58423	0.926355
Anapc11	8.05809	NA	NA	8.05809	2.3056	NA	NA	2.90696	6	NA	NA	6	1.71674	NA	NA	2.1645
Anapc13	0.985183	NA	0.985183	NA	2.41467	NA	4.37859	NA	1	NA	1	NA	2.45098	NA	4.44444	NA
Anapc16	16.6336	13.0864	NA	3.54719	12.5159	71.9033	NA	4.35773	4	1	NA	3	3.00978	5.49451	NA	3.6855
Anapc2	23.4457	NA	19.5591	3.8866	7.77118	NA	7.78006	8.57969	20	NA	18	2	6.6291	NA	7.1599	4.41501
Anapc4	6.83628	NA	1.89927	4.93701	2.56233	NA	0.783529	42.9305	4	NA	2	2	1.49925	NA	0.825083	17.3913
Anapc5	8.01589	NA	6.89266	1.12323	2.90326	NA	3.46191	1.94331	12	NA	11	1	4.34625	NA	5.52486	1.7301
Anapc7	29.2991	NA	6.33028	22.9688	10.6542	NA	3.72808	25.0204	10	NA	3	7	3.63636	NA	1.76678	7.62527
Angel1	15.235	NA	4.64204	10.593	3.95715	NA	2.31639	5.95445	8	NA	3	5	2.07792	NA	1.49701	2.81057
Angel2	20.8345	NA	15.5738	5.26068	6.22111	NA	9.56623	3.75763	14	NA	11	3	4.18035	NA	6.75676	2.14286
Angptl4	40.1348	NA	2.81274	37.3221	21.0903	NA	2.28122	76.6367	7	NA	3	4	3.6784	NA	2.43309	8.21355
Angptl6	3.9179	NA	3.9179	NA	2.50505	NA	2.85145	NA	1	NA	1	NA	0.639386	NA	0.727802	NA
Ank	19.41	3.06836	0.920013	15.4216	5.55206	9.38335	0.62205	9.12522	8	1	1	6	2.28833	3.0581	0.676133	3.5503
Ank3	93.7533	10.3708	27.3843	55.9983	8.77429	8.95577	4.63983	15.4478	28	1	10	17	2.6205	0.863558	1.69434	4.68966
Ankfy1	64.7037	NA	6.75469	57.949	8.05374	NA	1.92441	12.8747	30	NA	6	24	3.73413	NA	1.7094	5.33215
Ankhd1	134.506	4.2774	130.229	NA	16.3414	31.6844	17.03	NA	76	2	74	NA	9.23339	14.8148	9.677	NA
Ankib1	48.5731	NA	33.2371	15.336	7.16312	NA	18.4343	5.56258	15	NA	11	4	2.21206	NA	6.10094	1.45085
Ankle1	21.4523	NA	14.5415	6.91081	10.0526	NA	9.06014	13.6848	5	NA	4	1	2.34302	NA	2.49221	1.9802
Ankle2	66.3097	NA	63.5385	2.77126	12.6088	NA	21.9477	1.30045	22	NA	20	2	4.1833	NA	6.90846	0.938527
Ankmy2	4.21659	NA	0.692709	3.52388	1.72387	NA	0.523589	3.95941	3	NA	1	2	1.22649	NA	0.755858	2.24719
Ankra2	11.4276	NA	6.51145	4.91619	3.48298	NA	8.47845	2.69824	4	NA	3	1	1.21914	NA	3.90625	0.548847
Ankrd10	45.0519	0.776173	25.7316	18.5441	9.9255	0.844584	28.37	6.83527	24	1	12	11	5.28751	1.08814	13.2304	4.05455
Ankrd11	190.228	2.87747	172.613	14.7373	21.8176	6.28269	21.7616	44.7943	153	1	142	10	17.5479	2.18341	17.9022	30.3951
Ankrd12	73.7469	NA	44.4093	29.3376	8.20231	NA	7.24931	11.0666	11	NA	9	2	1.22345	NA	1.46915	0.754432
Ankrd13a	6.35513	NA	0.936748	5.41838	1.95422	NA	0.530135	3.88136	7	NA	2	5	2.15252	NA	1.13186	3.58166
Ankrd13b	7.18311	NA	2.03175	5.15136	2.15321	NA	0.971663	4.60354	5	NA	1	4	1.4988	NA	0.47824	3.57462
Ankrd13c	20.3165	NA	15.892	4.42452	7.65505	NA	9.77367	4.57551	8	NA	6	2	3.01432	NA	3.69004	2.06825
Ankrd16	11.0278	NA	5.4189	5.60886	4.68469	NA	4.98978	12.9835	7	NA	5	2	2.97366	NA	4.60405	4.62963
Ankrd17	129.44	NA	122.251	7.18982	12.8592	NA	15.6491	3.39784	65	NA	59	6	6.45738	NA	7.55248	2.83554
Ankrd22	16.0356	NA	1.74335	14.2922	9.14229	NA	3.02665	15.6713	7	NA	2	5	3.99088	NA	3.47222	5.48246
Ankrd23	0.545398	NA	NA	0.545398	0.279119	NA	NA	0.538931	1	NA	NA	1	0.511771	NA	NA	0.988142
Ankrd24	18.3643	NA	13.718	4.64632	5.02032	NA	4.6376	10.6812	4	NA	2	2	1.09349	NA	0.676133	4.5977
Ankrd26	6.27218	NA	6.27218	NA	1.09961	NA	1.243	NA	3	NA	3	NA	0.525947	NA	0.59453	NA
Ankrd27	35.9105	NA	4.57741	31.3331	7.25026	NA	1.44626	19.1523	16	NA	5	11	3.23037	NA	1.57978	6.72372
Ankrd28	43.9747	NA	14.9681	29.0067	8.40978	NA	4.73374	14.4672	24	NA	11	13	4.58979	NA	3.47881	6.48379
Ankrd29	2.77586	NA	NA	2.77586	0.852537	NA	NA	1.24088	1	NA	NA	1	0.307125	NA	NA	0.447027
Ankrd32	15.6635	NA	15.6635	NA	4.18587	NA	4.94898	NA	9	NA	9	NA	2.40513	NA	2.8436	NA
Ankrd35	2.25292	NA	NA	2.25292	0.555727	NA	NA	2.87729	1	NA	NA	1	0.24667	NA	NA	1.27714
Ankrd39	2.93686	NA	NA	2.93686	1.64438	NA	NA	2.41121	1	NA	NA	1	0.55991	NA	NA	0.821018
Ankrd40	49.567	NA	7.02286	42.5441	13.1722	NA	6.25924	17.8158	31	NA	14	17	8.23811	NA	12.4777	7.11893
Ankrd42	5.51098	5.51098	NA	NA	1.98094	5.77066	NA	NA	1	1	NA	NA	0.359454	1.04712	NA	NA
Ankrd44	11.8228	NA	NA	11.8228	1.92553	NA	NA	4.02546	1	NA	NA	1	0.162866	NA	NA	0.340483
Ankrd46	17.501	NA	8.81942	8.68154	7.05684	NA	12.8376	5.46352	10	NA	5	5	4.03226	NA	7.27802	3.14663
Ankrd49	60.4472	NA	27.71	32.7373	34.2671	NA	38.6471	34.3879	15	NA	10	5	8.5034	NA	13.947	5.2521
Ankrd50	108.886	46.5281	9.64681	52.7112	22.1539	50.1381	11.6087	16.7019	47	18	6	23	9.56256	19.3966	7.22022	7.28771
Ankrd52	14.2551	NA	6.96743	7.28765	2.15496	NA	2.15643	2.21846	20	NA	11	9	3.02343	NA	3.40452	2.73973
Ankrd54	3.81338	NA	NA	3.81338	2.03056	NA	NA	4.16308	3	NA	NA	3	1.59744	NA	NA	3.27511
Ankrd6	100.544	NA	6.18257	94.3614	20.8727	NA	2.8904	45.4097	19	NA	2	17	3.94436	NA	0.935016	8.18094
Ankrd9	85.9536	NA	49.2679	36.6858	33.6019	NA	50.2221	31.4629	8	NA	4	4	3.12744	NA	4.07747	3.43053
Anks1	42.2991	NA	10.7832	31.5159	5.96434	NA	3.0205	9.36301	14	NA	4	10	1.97406	NA	1.12045	2.97089
Anks3	1.54526	NA	0.696953	0.848311	0.622338	NA	0.354143	2.14762	2	NA	1	1	0.805477	NA	0.50813	2.53165
Ankzf1	56.5398	2.37021	2.22553	51.944	18.728	8.11715	0.952303	133.19	8	1	1	6	2.64988	3.42466	0.427899	15.3846
Ano1	21.0378	NA	11.3667	9.67117	4.56947	NA	3.71824	6.66977	10	NA	6	4	2.17202	NA	1.96271	2.75862
Ano10	50.0227	NA	12.5671	37.4555	18.8551	NA	6.34703	69.4908	7	NA	3	4	2.63852	NA	1.51515	7.42115
Ano3	3.75419	NA	3.75419	NA	0.622999	NA	1.27434	NA	1	NA	1	NA	0.165948	NA	0.339443	NA
Ano6	103.468	NA	10.5016	92.9669	18.1174	NA	3.7519	33.5499	55	NA	11	44	9.63054	NA	3.92997	15.8787
Ano9	6.56728	NA	NA	6.56728	2.18037	NA	NA	9.64358	7	NA	NA	7	2.32404	NA	NA	10.279
Anp32a	11.5153	NA	4.09969	7.41562	5.50445	NA	5.51033	6.23162	10	NA	3	7	4.78011	NA	4.03226	5.88235
Anp32b	3.49106	NA	2.6215	0.869562	2.55381	NA	3.20085	2.35654	5	NA	4	1	3.65764	NA	4.884	2.71003
Anp32e	11.0001	3.18671	1.30962	6.50373	3.37425	9.37269	1.67257	3.04339	13	2	5	6	3.98773	5.88235	6.3857	2.80767
Anpep	48.0302	NA	36.6227	11.4075	14.0316	NA	12.6242	27.0963	14	NA	11	3	4.08998	NA	3.7918	7.12589
Antxr1	52.1863	1.98452	5.92518	44.2766	9.91381	5.95952	3.5081	13.6572	54	2	8	44	10.2584	6.00601	4.73653	13.5719
Antxr2	77.613	6.52386	0.712389	70.3768	20.6913	15.7963	0.486604	37.5543	18	2	1	15	4.79872	4.84262	0.68306	8.00427
Anxa1	14.1894	1.65166	8.04168	4.49605	10.1716	22.3197	7.72495	16.0573	32	1	27	4	22.9391	13.5135	25.9366	14.2857
Anxa11	1.58678	NA	1.58678	NA	0.662538	NA	1.04946	NA	4	NA	4	NA	1.67015	NA	2.6455	NA
Anxa2	16.0232	0.837251	11.0342	4.15178	11.6617	11.3142	10.8178	14.8278	40	NA	32	8	29.1121	NA	31.3725	28.5714
Anxa3	2.97349	NA	NA	2.97349	1.86192	NA	NA	7.28797	1	NA	NA	1	0.626174	NA	NA	2.45098
Anxa4	12.3536	NA	3.068	9.28565	6.16757	NA	3.19584	10.0494	10	NA	3	7	4.99251	NA	3.125	7.57576
Anxa5	7.10372	NA	5.00932	2.0944	4.12288	NA	5.21804	4.98666	11	NA	8	3	6.38421	NA	8.33333	7.14286
Anxa6	7.84558	NA	4.09559	3.75	2.94836	NA	2.02551	7.5	8	NA	6	2	3.00639	NA	2.96736	4
Anxa7	13.0818	NA	5.19699	7.88485	4.41209	NA	3.73347	6.4736	18	NA	9	9	6.07083	NA	6.46552	7.38916
Aoc2	23.8672	NA	23.8672	NA	9.41507	NA	10.4957	NA	6	NA	6	NA	2.36686	NA	2.63852	NA
Aoc3	4.42866	NA	4.42866	NA	1.00743	NA	1.92718	NA	1	NA	1	NA	0.22748	NA	0.435161	NA
Aox4	0.887573	NA	0.887573	NA	0.178514	NA	0.221285	NA	1	NA	1	NA	0.201126	NA	0.249314	NA
Ap1ar	10.9121	NA	7.29346	3.61863	4.56573	NA	8.13095	2.95158	10	NA	6	4	4.1841	NA	6.68896	3.26264
Ap1b1	19.0136	NA	1.42429	17.5893	4.18525	NA	0.497655	17.5542	11	NA	3	8	2.42131	NA	1.04822	7.98403
Ap1g1	109.471	NA	6.47644	102.994	16.0585	NA	2.61357	25.6651	42	NA	5	37	6.16107	NA	2.01776	9.22003
Ap1g2	0.663366	NA	0.663366	NA	0.248173	NA	0.279194	NA	1	NA	1	NA	0.374111	NA	0.420875	NA
Ap1m1	5.15944	NA	1.12711	4.03233	2.62701	NA	0.886094	6.48284	6	NA	2	4	3.05499	NA	1.57233	6.43087
Ap1m2	1.89151	NA	1.14114	0.750363	1.08832	NA	0.892914	2.00097	3	NA	2	1	1.72612	NA	1.56495	2.66667
Ap1s1	3.55863	NA	0.884746	2.67388	2.78671	NA	1.85481	3.56518	4	NA	1	3	3.13234	NA	2.09644	4
Ap2a1	2.56657	NA	2.56657	NA	0.745446	NA	0.874769	NA	4	NA	4	NA	1.16178	NA	1.36333	NA
Ap2a2	10.7059	NA	5.39712	5.30881	2.30781	NA	1.91591	3.23314	15	NA	8	7	3.23346	NA	2.8399	4.26309
Ap2b1	15.4073	NA	3.90376	11.5035	2.84845	NA	1.36686	4.81521	18	NA	6	12	3.32779	NA	2.10084	5.02302
Ap2m1	0.947253	NA	NA	0.947253	0.460502	NA	NA	1.55798	1	NA	NA	1	0.486145	NA	NA	1.64474
Ap2s1	4.25308	2.61226	0.804315	0.83651	5.32968	28.3941	1.87486	3.01989	4	1	2	1	5.01253	10.8696	4.662	3.61011
Ap3b1	5.51168	NA	0.742902	4.76878	1.37107	NA	0.223901	8.5462	5	NA	1	4	1.24378	NA	0.301386	7.16846
Ap3d1	17.7257	NA	6.75469	10.971	3.7475	NA	1.8763	12.056	16	NA	6	10	3.38266	NA	1.66667	10.989
Ap3m1	1.37265	NA	NA	1.37265	0.310274	NA	NA	0.47978	1	NA	NA	1	0.22604	NA	NA	0.349528
Ap3s2	18.9254	NA	NA	18.9254	3.26075	NA	NA	3.66842	10	NA	NA	10	1.72295	NA	NA	1.93836
Ap4e1	31.1244	NA	27.5874	3.53704	4.77076	NA	8.1886	1.13658	9	NA	7	2	1.37952	NA	2.07777	0.642674
Ap4m1	43.7544	NA	8.62227	35.1321	25.4979	NA	6.38687	179.245	14	NA	4	10	8.15851	NA	2.96296	51.0204
Ap5b1	69.4381	NA	69.4381	NA	22.4574	NA	26.3923	NA	13	NA	13	NA	4.2044	NA	4.94109	NA
Ap5m1	42.5383	NA	40.8734	1.66493	13.4402	NA	27.7484	1.19264	11	NA	9	2	3.47551	NA	6.10998	1.43266
Ap5z1	25.2735	NA	4.99493	20.2785	6.62129	NA	2.06061	16.5	8	NA	5	3	2.09589	NA	2.06271	2.44101
Apaf1	19.5248	NA	2.67659	16.8482	2.97771	NA	0.713756	7.87669	3	NA	2	1	0.457526	NA	0.533333	0.467508
Apba3	12.7816	NA	10.3938	2.38773	6.06624	NA	6.05702	18.801	6	NA	5	1	2.84765	NA	2.91375	7.87402
Apbb2	217.864	NA	45.2771	172.587	31.4061	NA	20.8843	45.2153	26	NA	5	21	3.74802	NA	2.30627	5.5017
Apbb3	2.36895	NA	NA	2.36895	1.14886	NA	NA	8.46053	1	NA	NA	1	0.484966	NA	NA	3.57143
Apc	234.767	NA	221.07	13.6975	18.8583	NA	25.9198	3.79537	85	NA	80	5	6.82786	NA	9.37976	1.38543
Apcdd1	74.5579	4.08799	44.9121	25.5578	26.6373	12.1305	29.0693	27.8711	90	3	53	34	32.1543	8.90208	34.3042	37.0774
Apeh	17.8361	NA	1.69644	16.1396	7.45966	NA	0.771461	102.149	7	NA	2	5	2.92765	NA	0.909504	31.6456
Apex1	16.3451	3.68659	10.0832	2.5753	12.5058	26.7144	10.5694	11.9781	9	1	6	2	6.886	7.24638	6.28931	9.30233
Apex2	23.6994	NA	20.4847	3.21474	12.5726	NA	13.2074	12.317	6	NA	4	2	3.18302	NA	2.57898	7.66284
Aph1a	4.5962	NA	NA	4.5962	1.42961	NA	NA	2.06943	2	NA	NA	2	0.622084	NA	NA	0.900495
Aph1b	3.49664	NA	NA	3.49664	0.767143	NA	NA	0.938443	1	NA	NA	1	0.219394	NA	NA	0.268384
Api5	12.2051	NA	1.75745	10.4476	3.29688	NA	1.16003	5.14154	7	NA	2	5	1.89087	NA	1.32013	2.46063
Apitd1	4.67673	NA	1.12068	3.55605	5.02874	NA	2.6123	8.38691	2	NA	1	1	2.15054	NA	2.331	2.35849
Aplf	21.1822	NA	7.30315	13.879	6.46192	NA	4.86877	8.86838	5	NA	3	2	1.52532	NA	2	1.27796
Aplp2	22.2897	1.7062	7.71282	12.8707	6.03404	19.3886	3.3651	9.79508	28	1	12	15	7.57986	11.3636	5.2356	11.4155
Apmap	12.2181	NA	1.61101	10.6071	5.57903	NA	1.29087	11.8119	6	NA	1	5	2.73973	NA	0.801282	5.56793
Apoa1bp	1.22044	NA	1.22044	NA	1.34855	NA	1.43751	NA	2	NA	2	NA	2.20994	NA	2.35571	NA
Apoc1	4.72482	1.99823	1.85942	0.867164	8.52855	10.4619	6.96414	9.03296	4	1	2	1	7.22022	5.2356	7.49064	10.4167
Apoe	16.9228	0.934169	13.363	2.62565	13.5274	5.21882	14.2767	19.3062	22	1	18	3	17.5859	5.58659	19.2308	22.0588
Apol8	8.62242	NA	2.88035	5.74208	4.6912	NA	2.82387	7.73865	4	NA	2	2	2.17628	NA	1.96078	2.69542
Apool	1.69857	NA	0.98654	0.712033	1.76935	NA	1.23627	4.81103	3	NA	1	2	3.125	NA	1.25313	13.5135
Apopt1	0.829673	NA	NA	0.829673	0.668014	NA	NA	1.55661	2	NA	NA	2	1.61031	NA	NA	3.75235
App	32.9741	0.982531	14.5864	17.4051	9.82249	6.59417	6.30628	19.4471	46	1	26	19	13.7027	6.71141	11.2408	21.2291
Appbp2	15.2403	NA	8.67241	6.56792	6.33694	NA	4.93311	19.5474	7	NA	5	2	2.9106	NA	2.84414	5.95238
Appl1	31.9429	NA	6.98936	24.9536	4.58884	NA	3.29066	5.26446	17	NA	8	9	2.44218	NA	3.76648	1.89873
Appl2	13.3616	NA	3.63409	9.72749	4.53704	NA	1.82709	11.1426	4	NA	1	3	1.35823	NA	0.502765	3.43643
Aprt	4.96872	1.15259	1.24672	2.5694	5.73755	15.3679	2.29599	10.3605	7	1	3	3	8.08314	13.3333	5.52486	12.0968
Aptx	9.37264	NA	2.5159	6.85675	1.63088	NA	2.95988	1.53018	4	NA	1	3	0.696015	NA	1.17647	0.669493
Aqp3	25.6809	3.78641	9.22983	12.6647	14.5666	51.1678	10.5004	15.6354	32	2	22	8	18.1509	27.027	25.0284	9.87654
Aqp9	1.18446	NA	1.18446	NA	0.39975	NA	1.09978	NA	1	NA	1	NA	0.337496	NA	0.928505	NA
Aqr	17.6461	NA	11.6889	5.9572	3.46205	NA	2.53665	18.8519	17	NA	14	3	3.3353	NA	3.03819	9.49367
Ar	1.63619	NA	1.63619	NA	0.54558	NA	0.605998	NA	1	NA	1	NA	0.333444	NA	0.37037	NA
Araf	22.2683	NA	2.24458	20.0238	6.87931	NA	1.23396	15.6313	10	NA	3	7	3.08928	NA	1.64926	5.46448
Arap1	12.1909	1.61405	1.46642	9.1104	1.91861	1.67607	0.355409	7.2019	8	1	2	5	1.25905	1.03842	0.484731	3.95257
Arap2	26.4079	NA	18.8106	7.5973	3.58706	NA	3.6797	4.16519	19	NA	12	7	2.58082	NA	2.34742	3.83772
Arc	62.1977	0.587985	26.0224	35.5873	20.3327	2.96962	21.8492	21.3098	18	1	5	12	5.88428	5.05051	4.19815	7.18563
Arcn1	8.20637	NA	2.7418	5.46456	2.37522	NA	1.78503	3.06481	9	NA	3	6	2.60492	NA	1.95312	3.36511
Arel1	101.011	1.36861	NA	99.6419	18.592	2.16552	NA	42.7831	24	1	NA	23	4.41745	1.58228	NA	9.87548
Arf1	10.8803	1.93119	1.3154	7.63371	5.21587	4.62008	2.40915	6.80366	10	1	1	8	4.79386	2.39234	1.8315	7.13012
Arf2	4.77495	NA	1.42148	3.35348	1.79577	NA	2.60344	2.11309	7	NA	2	5	2.63257	NA	3.663	3.1506
Arf3	17.9463	3.59858	4.85942	9.48834	5.15552	15.7833	8.90004	3.50511	20	2	4	14	5.74548	8.77193	7.32601	5.17178
Arf4	11.3378	1.69881	0.938587	8.70035	5.55228	7.61798	1.72852	6.81846	13	2	3	8	6.36631	8.96861	5.52486	6.26959
Arf5	3.31389	NA	2.15825	1.15564	3.55187	NA	3.97467	3.38899	6	NA	4	2	6.43087	NA	7.36648	5.8651
Arf6	69.5688	3.33797	39.4605	26.7703	18.6461	6.13597	74.7358	10.0678	46	3	25	18	12.3291	5.51471	47.3485	6.76946
Arfgap1	79.143	NA	11.4408	67.7022	26.4427	NA	9.56589	58.6674	29	NA	10	19	9.68927	NA	8.3612	16.4645
Arfgap2	3.84451	NA	0.613162	3.23135	1.12775	NA	0.382032	2.03742	4	NA	1	3	1.17336	NA	0.623053	1.89155
Arfgap3	11.4065	NA	0.770417	10.6361	4.35696	NA	0.489154	11.2551	5	NA	1	4	1.90985	NA	0.634921	4.2328
Arfgef1	26.5899	NA	16.332	10.2579	3.7759	NA	2.94749	7.74178	19	NA	15	4	2.6981	NA	2.70709	3.01887
Arfgef2	26.1755	NA	NA	26.1755	2.98262	NA	NA	8.02191	4	NA	NA	4	0.455789	NA	NA	1.22587
Arfip1	16.0645	NA	6.88023	9.1843	5.3282	NA	6.13211	5.493	17	NA	11	6	5.63847	NA	9.80392	3.58852
Arfip2	12.0548	NA	1.40259	10.6522	3.6786	NA	1.36705	5.22934	9	NA	1	8	2.74641	NA	0.974659	3.92734
Arfrp1	2.10295	NA	NA	2.10295	0.810073	NA	NA	1.17878	1	NA	NA	1	0.385208	NA	NA	0.560538
Arg2	3.01377	NA	3.01377	NA	2.12687	NA	2.82983	NA	1	NA	1	NA	0.705716	NA	0.938967	NA
Arglu1	31.6643	3.96374	4.36536	23.3352	18.4955	18.017	5.34971	34.5196	19	1	6	12	11.0981	4.54545	7.35294	17.7515
Arhgap1	11.0391	NA	4.74361	6.29553	3.42724	NA	3.29876	4.43347	14	NA	6	8	4.34648	NA	4.17246	5.6338
Arhgap10	8.98729	NA	2.26291	6.72438	2.95829	NA	0.958454	12.1598	4	NA	3	1	1.31666	NA	1.27065	1.80832
Arhgap11a	101.38	NA	86.5101	14.8703	20.2074	NA	29.187	10.0407	34	NA	28	6	6.77696	NA	9.44669	4.05132
Arhgap12	78.518	NA	39.414	39.104	15.6037	NA	15.6591	18.5679	26	NA	12	14	5.16693	NA	4.76758	6.64767
Arhgap17	36.4476	NA	NA	36.4476	10.1695	NA	NA	36.0867	11	NA	NA	11	3.0692	NA	NA	10.8911
Arhgap18	6.14769	NA	2.06827	4.07943	1.70014	NA	1.03829	2.6285	5	NA	3	2	1.38274	NA	1.50602	1.28866
Arhgap19	6.8395	NA	1.62932	5.21018	1.33064	NA	1.09718	1.44808	3	NA	1	2	0.583658	NA	0.673401	0.555864
Arhgap21	211.885	12.1981	174.227	25.4596	30.3908	39.2221	29.691	32.1054	87	4	69	14	12.4785	12.8617	11.7587	17.6545
Arhgap22	24.9863	NA	20.6975	4.28872	9.61749	NA	9.81391	11.9797	5	NA	4	1	1.92456	NA	1.89663	2.7933
Arhgap23	52.9238	1.39817	51.5256	NA	9.71079	4.1002	13.4391	NA	22	1	21	NA	4.0367	2.93255	5.47731	NA
Arhgap24	24.5282	NA	15.6578	8.8704	7.01206	NA	7.32014	14.5416	10	NA	7	3	2.85878	NA	3.27256	4.91803
Arhgap25	77.0831	NA	35.9758	41.1073	20.285	NA	19.3107	29.8962	20	NA	11	9	5.26316	NA	5.90446	6.54545
Arhgap27	6.57605	NA	2.08848	4.48757	1.16887	NA	0.760832	2.06325	2	NA	1	1	0.355492	NA	0.364299	0.45977
Arhgap29	57.0748	NA	55.658	1.41679	11.2131	NA	14.643	1.20271	29	NA	27	2	5.69745	NA	7.10339	1.69779
Arhgap31	2.23945	NA	NA	2.23945	0.290009	NA	NA	0.726622	1	NA	NA	1	0.1295	NA	NA	0.324465
Arhgap32	230.471	NA	183.438	47.0331	21.0054	NA	29.4633	10.78	82	NA	68	14	7.47357	NA	10.9219	3.2088
Arhgap33	17.2489	NA	13.8711	3.37778	3.87877	NA	3.54036	9.33088	9	NA	7	2	2.02384	NA	1.78663	5.52486
Arhgap35	225.418	2.15405	147.507	75.757	26.8578	3.0211	32.7793	23.8229	119	1	79	39	14.1785	1.40252	17.5556	12.2642
Arhgap39	55.7332	NA	45.7437	9.98947	12.1502	NA	13.7368	10.0195	16	NA	13	3	3.48812	NA	3.9039	3.00903
Arhgap42	24.0334	NA	13.0682	10.9652	4.44733	NA	5.17348	4.14719	21	NA	14	7	3.88601	NA	5.54236	2.6475
Arhgap44	13.2174	NA	NA	13.2174	3.24434	NA	NA	9.07792	2	NA	NA	2	0.490918	NA	NA	1.37363
Arhgap5	181.801	NA	174.183	7.61742	34.9886	NA	38.6044	14.8488	73	NA	69	4	14.0493	NA	15.2926	7.79727
Arhgap8	8.92574	NA	NA	8.92574	5.76971	NA	NA	68.6595	1	NA	NA	1	0.646412	NA	NA	7.69231
Arhgap9	1.40133	NA	NA	1.40133	0.565965	NA	NA	5.13307	3	NA	NA	3	1.21163	NA	NA	10.989
Arhgdia	19.4127	0.808668	6.90388	11.7001	7.10567	6.68321	11.2258	5.86179	31	NA	11	20	11.347	NA	17.8862	10.02
Arhgdib	9.71881	1.97626	1.22203	6.52052	8.83528	25.0159	2.02658	15.5993	8	2	3	3	7.27273	25.3165	4.97512	7.17703
Arhgef1	11.2977	NA	7.3136	3.98414	3.14088	NA	2.48508	11.6837	12	NA	10	2	3.33611	NA	3.39789	5.8651
Arhgef10	34.3934	NA	17.3351	17.0583	6.22167	NA	4.293	13.5923	14	NA	6	8	2.53256	NA	1.48588	6.3745
Arhgef11	14.6721	NA	9.07878	5.59334	2.62002	NA	1.94865	6.00789	12	NA	8	4	2.14286	NA	1.71711	4.29646
Arhgef12	126.948	25.1284	29.1452	72.674	12.1099	49.4654	6.28806	13.6094	75	5	23	47	7.15444	9.84252	4.96224	8.8015
Arhgef16	4.98214	NA	1.42614	3.55601	1.83369	NA	0.665797	7.31689	4	NA	1	3	1.47221	NA	0.466853	6.17284
Arhgef17	148.696	5.15056	110.255	33.2904	14.5069	12.2051	17.8579	9.11066	48	2	32	14	4.68293	4.73934	5.18303	3.83142
Arhgef18	35.04	NA	6.9968	28.0432	6.61133	NA	2.28206	13.5803	21	NA	5	16	3.96226	NA	1.63079	7.74818
Arhgef19	30.5668	6.8421	7.17643	16.5483	8.99817	22.4331	2.97901	24.2288	16	2	7	7	4.71004	6.55738	2.90577	10.2489
Arhgef2	24.2404	NA	6.76713	17.4733	4.99802	NA	2.28774	14.6958	12	NA	4	8	2.47423	NA	1.35227	6.72834
Arhgef26	111.387	15.7274	62.9667	32.6926	21.3999	21.8436	24.1252	17.436	20	2	13	5	3.84246	2.77778	4.98084	2.66667
Arhgef28	34.1071	NA	29.9713	4.13587	5.44929	NA	5.87326	3.93144	10	NA	8	2	1.5977	NA	1.56771	1.90114
Arhgef3	82.0216	NA	31.0508	50.9709	17.9872	NA	16.2484	26.3824	46	NA	14	32	10.0877	NA	7.32601	16.5631
Arhgef37	29.2374	NA	5.63671	23.6007	9.04064	NA	2.77534	22.5628	8	NA	4	4	2.47372	NA	1.96947	3.82409
Arhgef39	2.40831	NA	2.40831	NA	1.48478	NA	2.32687	NA	1	NA	1	NA	0.616523	NA	0.966184	NA
Arhgef4	29.1912	NA	1.15918	28.032	10.7558	NA	0.796684	30.3049	11	NA	1	10	4.05306	NA	0.687285	10.8108
Arhgef40	37.1289	NA	33.2344	3.89458	6.57964	NA	7.26434	4.27037	7	NA	5	2	1.24047	NA	1.0929	2.19298
Arhgef5	124.248	NA	100.295	23.9529	22.9791	NA	21.1325	43.6301	66	NA	58	8	12.2064	NA	12.2208	14.5719
Arhgef7	43.4481	NA	1.06973	42.3784	5.8453	NA	0.46089	9.29759	15	NA	1	14	2.01803	NA	0.430849	3.07152
Arid1a	219.931	NA	204.172	15.7582	26.9028	NA	29.7975	11.911	104	NA	95	9	12.7217	NA	13.8646	6.80272
Arid1b	166.087	NA	126.28	39.8076	14.6655	NA	18.7498	8.71254	72	NA	58	14	6.35762	NA	8.61173	3.06413
Arid2	161.547	NA	129.073	32.4739	17.892	NA	23.5235	9.63904	89	NA	67	22	9.85713	NA	12.2107	6.53013
Arid4a	47.7595	NA	39.015	8.74453	8.26289	NA	10.3051	5.00546	18	NA	15	3	3.11419	NA	3.96197	1.71723
Arid4b	95.0832	NA	51.2857	43.7974	15.5543	NA	13.0002	23.4211	52	NA	32	20	8.50646	NA	8.11153	10.6952
Arid5a	92.8846	NA	43.2553	49.6294	16.0312	NA	28.6269	12.9716	34	NA	19	15	5.86814	NA	12.5745	3.92054
Arid5b	126.273	2.40136	74.8181	49.054	28.0982	150.085	20.9751	53.8464	65	1	45	19	14.4637	62.5	12.6156	20.8562
Arih1	29.9784	2.62926	7.92075	19.4284	4.65865	97.38	4.74865	4.09881	36	NA	11	25	5.59441	NA	6.59472	5.27426
Arih2	10.5736	NA	0.692332	9.88123	2.69527	NA	0.468108	4.61955	5	NA	1	4	1.27453	NA	0.676133	1.87003
Arl1	1.01331	NA	NA	1.01331	1.20345	NA	NA	6.80071	2	NA	NA	2	2.3753	NA	NA	13.4228
Arl13b	43.9161	NA	1.77501	42.1411	12.462	NA	1.38241	21.6887	16	NA	2	14	4.5403	NA	1.55763	7.20535
Arl14ep	26.9059	1.21868	22.204	3.48327	7.93919	4.49696	26.7196	1.52307	11	1	8	2	3.2458	3.69004	9.62696	0.874508
Arl15	24.5911	NA	2.90299	21.6881	7.31661	NA	4.72031	8.32558	10	NA	4	6	2.9753	NA	6.50407	2.30326
Arl16	21.744	NA	NA	21.744	10.7484	NA	NA	16.4229	2	NA	NA	2	0.988631	NA	NA	1.51057
Arl2	2.6277	NA	NA	2.6277	3.02382	NA	NA	9.45216	2	NA	NA	2	2.3015	NA	NA	7.19424
Arl2bp	10.3968	NA	NA	10.3968	4.65182	NA	NA	7.76461	10	NA	NA	10	4.47427	NA	NA	7.46826
Arl3	1.39494	NA	0.519884	0.875055	1.69701	NA	0.946966	3.80458	3	NA	2	1	3.64964	NA	3.64299	4.34783
Arl4a	47.5339	NA	34.6671	12.8668	12.4859	NA	57.4911	4.50993	29	NA	20	9	7.61755	NA	33.1675	3.15457
Arl4c	89.2564	8.67666	12.6685	67.9112	22.5054	16.4642	21.88	23.7452	46	5	13	28	11.5986	9.48767	22.4525	9.79021
Arl4d	22.9729	NA	16.679	6.29392	16.6229	NA	27.5231	10.908	9	NA	7	2	6.5123	NA	11.5512	3.4662
Arl5a	71.9962	NA	3.85768	68.1385	13.8135	NA	7.14386	15.3707	19	NA	3	16	3.64543	NA	5.55556	3.60929
Arl5b	26.7283	NA	NA	26.7283	7.43694	NA	NA	9.25817	15	NA	NA	15	4.17362	NA	NA	5.1957
Arl6ip1	14.3411	NA	4.36074	9.98038	6.71715	NA	7.12539	7.11867	19	NA	6	13	8.8993	NA	9.80392	9.27247
Arl6ip4	2.35898	NA	0.76068	1.5983	1.99575	NA	1.10243	10.3786	2	NA	1	1	1.69205	NA	1.44928	6.49351
Arl6ip5	12.3619	NA	NA	12.3619	9.23219	NA	NA	16.6378	6	NA	NA	6	4.48096	NA	NA	8.07537
Arl6ip6	11.1055	NA	1.41475	9.69072	4.34997	NA	2.07746	5.28681	6	NA	1	5	2.35018	NA	1.46843	2.72777
Arl8a	3.01154	NA	1.06618	1.94537	1.76941	NA	1.90049	1.95122	2	NA	1	1	1.17509	NA	1.78253	1.00301
Arl8b	12.4114	NA	NA	12.4114	4.23888	NA	NA	5.71693	16	NA	NA	16	5.46448	NA	NA	7.36988
Armc1	32.0289	NA	3.79429	28.2347	10.9276	NA	4.46913	14.9548	7	NA	1	6	2.38826	NA	1.17786	3.17797
Armc10	24.1119	NA	0.422093	23.6898	11.9721	NA	0.458299	24.3222	16	NA	1	15	7.94439	NA	1.08578	15.4004
Armc5	35.4519	NA	25.0218	10.4301	9.24671	NA	8.9974	36.8555	11	NA	7	4	2.86907	NA	2.51708	14.1343
Armc6	2.84326	NA	NA	2.84326	1.29357	NA	NA	6.02386	1	NA	NA	1	0.454959	NA	NA	2.11864
Armc7	34.4603	NA	14.7291	19.7312	15.3225	NA	24.6719	14.1747	3	NA	1	2	1.33393	NA	1.67504	1.43678
Armc8	16.4178	NA	NA	16.4178	2.38978	NA	NA	3.62503	4	NA	NA	4	0.582242	NA	NA	0.883197
Armcx1	9.99275	NA	8.33703	1.65573	4.05386	NA	6.08098	4.23459	5	NA	4	1	2.0284	NA	2.91758	2.55754
Armcx2	43.6825	22.011	21.1522	0.519282	11.5623	21.2257	8.98182	1.34529	9	3	5	1	2.38221	2.89296	2.12314	2.59067
Armcx4	28.7052	NA	28.7052	NA	3.18557	NA	4.05957	NA	2	NA	2	NA	0.221951	NA	0.282845	NA
Armcx6	18.1438	NA	18.1438	NA	8.92028	NA	20.0263	NA	1	NA	1	NA	0.491642	NA	1.10375	NA
Arnt	10.2132	NA	1.73901	8.4742	2.33765	NA	0.731909	4.59057	8	NA	2	6	1.83108	NA	0.841751	3.25027
Arntl	4.17691	NA	4.17691	NA	1.43635	NA	2.22058	NA	1	NA	1	NA	0.343879	NA	0.531632	NA
Arntl2	5.39512	NA	2.34172	3.0534	2.05685	NA	2.04696	3.45798	3	NA	2	1	1.14373	NA	1.74825	1.1325
Arpc1a	5.1372	NA	NA	5.1372	3.23501	NA	NA	15.0651	6	NA	NA	6	3.77834	NA	NA	17.5953
Arpc1b	2.60433	NA	1.41276	1.19157	1.67913	NA	1.26252	3.64393	2	NA	1	1	1.28949	NA	0.893655	3.0581
Arpc2	10.5417	1.19934	3.7911	5.55125	6.60094	4.34545	4.19834	13.2805	14	1	6	7	8.76644	3.62319	6.64452	16.7464
Arpc3	3.20286	NA	2.59	0.612858	3.77695	NA	4.82309	2.48121	7	NA	6	1	8.25472	NA	11.1732	4.04858
Arpc4	8.65588	2.5517	1.66607	4.43811	3.81148	10.4578	4.67998	2.65596	15	5	4	6	6.60502	20.4918	11.236	3.59066
Arpc5	11.4807	NA	3.14248	8.33824	6.05204	NA	6.89141	6.62817	12	NA	3	9	6.32578	NA	6.57895	7.15421
Arpc5l	9.9382	NA	1.86773	8.07047	7.8192	NA	4.04271	10.732	5	NA	3	2	3.93391	NA	6.49351	2.65957
Arpp19	17.5543	NA	0.712014	16.8423	4.24222	NA	1.66358	4.80111	19	NA	2	17	4.59159	NA	4.6729	4.84607
Arrb2	4.00625	NA	NA	4.00625	2.01522	NA	NA	7.01621	1	NA	NA	1	0.503018	NA	NA	1.75131
Arrdc1	10.6128	NA	7.06705	3.5458	6.26126	NA	5.41536	13.9598	8	NA	6	2	4.71976	NA	4.5977	7.87402
Arrdc2	19.7421	NA	NA	19.7421	8.4152	NA	NA	24.5854	3	NA	NA	3	1.27877	NA	NA	3.73599
Arrdc3	75.167	1.55315	0.557615	73.0563	18.3782	6.81207	0.447884	27.916	29	1	1	27	7.09046	4.38596	0.803213	10.3172
Arrdc4	32.5914	NA	9.3242	23.2672	8.24056	NA	7.36508	9.24403	12	NA	5	7	3.03413	NA	3.94945	2.78109
Arsa	16.3003	6.00305	3.76844	6.52885	4.66925	4.96941	2.47761	8.56805	7	2	2	3	2.00516	1.65563	1.31492	3.93701
Arsi	34.2367	NA	34.2367	NA	19.8819	NA	19.8819	NA	5	NA	5	NA	2.9036	NA	2.9036	NA
Arsk	3.14324	NA	NA	3.14324	0.859515	NA	NA	1.71387	1	NA	NA	1	0.273448	NA	NA	0.545256
Art3	14.886	NA	7.6226	7.26342	9.52401	NA	7.01897	27.8292	3	NA	1	2	1.91939	NA	0.92081	7.66284
Art4	67.6311	11.8151	15.906	39.9101	28.3687	33.0955	17.6146	35.5072	24	6	7	11	10.0671	16.8067	7.75194	9.78648
Artn	19.3523	0.934525	NA	18.4178	8.02667	0.719419	NA	35.7627	6	1	NA	5	2.48859	0.769823	NA	9.70874
Arv1	10.7701	NA	5.40806	5.36202	9.2447	NA	6.75163	16.8088	3	NA	3	NA	2.57511	NA	3.74532	NA
Arvcf	36.8794	NA	12.6391	24.2403	7.31733	NA	4.34333	16.3786	12	NA	6	6	2.38095	NA	2.06186	4.05405
Arxes2	32.0569	NA	NA	32.0569	20.8162	NA	NA	37.3623	2	NA	NA	2	1.2987	NA	NA	2.331
Asah1	7.53503	NA	1.84099	5.69404	3.34741	NA	1.55358	5.97485	9	NA	3	6	3.99822	NA	2.53165	6.29591
Asah2	10.9076	NA	10.9076	NA	2.26393	NA	4.80299	NA	2	NA	2	NA	0.41511	NA	0.880669	NA
Asap1	39.0804	NA	18.0742	21.0062	6.03186	NA	5.24956	8.05761	21	NA	10	11	3.24124	NA	2.90444	4.21941
Asap2	4.45721	NA	0.318149	4.13907	0.784859	NA	0.105627	1.73983	3	NA	1	2	0.528262	NA	0.332005	0.840689
Asap3	66.0548	NA	NA	66.0548	11.8335	NA	NA	24.3475	10	NA	NA	10	1.79147	NA	NA	3.68596
Asb13	11.2797	NA	1.37153	9.90812	4.68036	NA	1.84099	6.33512	10	NA	1	9	4.14938	NA	1.34228	5.75448
Asb3	24.1746	NA	11.005	13.1695	7.496	NA	6.97405	9.0079	6	NA	3	3	1.86047	NA	1.90114	2.05198
Asb6	27.8318	NA	16.3071	11.5247	13.1717	NA	12.973	15.532	13	NA	9	4	6.15239	NA	7.1599	5.39084
Asb7	35.5651	NA	18.8565	16.7086	7.27153	NA	19.7038	5.19061	5	NA	3	2	1.02229	NA	3.1348	0.621311
Asb8	40.7772	NA	25.8583	14.9189	17.9004	NA	29.8251	12.7949	9	NA	7	2	3.95083	NA	8.07382	1.71527
Ascc1	0.955304	NA	0.955304	NA	0.605389	NA	0.891974	NA	2	NA	2	NA	1.26743	NA	1.86741	NA
Ascc2	11.9182	NA	4.49738	7.42078	4.57511	NA	1.99883	24.0934	8	NA	5	3	3.07102	NA	2.22222	9.74026
Ascc3	21.8463	NA	21.1351	0.711191	2.9218	NA	3.20374	1.1678	16	NA	15	1	2.1399	NA	2.27376	1.64204
Ascl2	26.1459	NA	NA	26.1459	16.2195	NA	NA	48.7796	4	NA	NA	4	2.48139	NA	NA	7.46269
Ascl4	29.6652	NA	8.27339	21.3918	25.6397	NA	19.0193	29.6285	4	NA	1	3	3.45722	NA	2.29885	4.15512
Asf1b	19.4971	NA	7.41581	12.0813	12.1933	NA	12.177	14.1302	6	NA	2	4	3.75235	NA	3.28407	4.67836
Ash1l	193.052	1.6754	178.093	13.2835	17.1297	16.754	20.0623	5.79307	89	1	81	7	7.89707	10	9.1247	3.05277
Ash2l	4.9357	NA	2.94682	1.98888	1.40738	NA	1.65459	1.42063	7	NA	5	2	1.99601	NA	2.80741	1.42857
Asl	0.879495	NA	0.879495	NA	0.575209	NA	0.630462	NA	1	NA	1	NA	0.654022	NA	0.716846	NA
Asna1	5.48629	NA	3.67163	1.81466	4.37852	NA	3.50681	9.40237	4	NA	3	1	3.19234	NA	2.86533	5.18135
Asns	2.58932	NA	1.38766	1.20165	1.3437	NA	0.823051	8.3448	4	NA	2	2	2.07577	NA	1.18624	13.8889
Asnsd1	51.665	1.25972	48.78	1.62525	21.1568	2.83082	25.8917	14.3828	22	1	20	1	9.00901	2.24719	10.6157	8.84956
Asph	26.2204	NA	NA	26.2204	2.10167	NA	NA	2.93097	4	NA	NA	4	0.320616	NA	NA	0.447127
Aspm	158.005	NA	154.03	3.97486	16.0151	NA	16.4404	11.7599	57	NA	55	2	5.77742	NA	5.87042	5.91716
Asprv1	40.6037	NA	30.5322	10.0715	26.521	NA	29.9335	19.7094	23	NA	17	6	15.0229	NA	16.6667	11.7417
Aspscr1	4.84888	2.02267	2.82621	NA	2.5916	10.0132	1.78874	NA	5	2	3	NA	2.67237	9.90099	1.89873	NA
Ass1	1.60635	NA	1.60635	NA	0.984886	NA	1.29649	NA	2	NA	2	NA	1.22624	NA	1.61421	NA
Aste1	60.9301	NA	57.557	3.37305	21.5758	NA	32.4082	7.63134	8	NA	7	1	2.83286	NA	3.94144	2.26244
Astn2	59.7726	NA	35.0226	24.75	12.3727	NA	8.62838	38.1357	11	NA	6	5	2.27696	NA	1.4782	7.70416
Asun	7.26474	NA	3.47612	3.78862	2.37488	NA	1.58077	12.0657	5	NA	4	1	1.63452	NA	1.81901	3.18471
Asxl1	177.356	NA	165.073	12.2822	26.5741	NA	36.3198	6.35065	79	NA	74	5	11.837	NA	16.2816	2.58532
Asxl2	141.163	NA	130.36	10.8026	15.6274	NA	30.6225	2.41291	37	NA	30	7	4.09609	NA	7.04722	1.56355
Atad1	4.37392	NA	1.54904	2.82488	1.55489	NA	1.42637	1.68048	6	NA	2	4	2.13295	NA	1.84162	2.37954
Atad2	37.655	NA	37.655	NA	6.6259	NA	9.19535	NA	22	NA	22	NA	3.87119	NA	5.37241	NA
Atad2b	48.9052	NA	26.3567	22.5485	6.03619	NA	6.01339	6.70488	19	NA	8	11	2.3451	NA	1.82523	3.27089
Atad3a	9.37421	NA	0.20851	9.1657	3.87524	NA	0.117404	16.7257	5	NA	1	4	2.06697	NA	0.563063	7.29927
Atad5	137.024	NA	113.782	23.2417	18.8426	NA	20.7593	16.3674	23	NA	20	3	3.16282	NA	3.64897	2.11268
Atat1	3.18083	NA	1.67745	1.50338	1.28104	NA	1.29035	1.30728	2	NA	1	1	0.805477	NA	0.769231	0.869565
Ate1	4.18513	NA	0.916139	3.26899	0.781391	NA	0.519059	1.0669	4	NA	2	2	0.746826	NA	1.13314	0.652742
Atf1	0.490882	NA	0.490882	NA	0.210769	NA	0.606027	NA	1	NA	1	NA	0.429369	NA	1.23457	NA
Atf2	18.266	1.60651	2.73251	13.927	2.83942	1.75383	2.45951	3.16091	15	3	3	9	2.33173	3.27511	2.70027	2.04267
Atf3	47.0346	2.74164	9.04738	35.2455	23.8029	11.1904	16.5703	29.7431	45	5	14	26	22.7733	20.4082	25.641	21.9409
Atf4	11.2219	1.32932	9.89258	NA	6.4904	2.23791	9.4215	NA	22	2	20	NA	12.7241	3.367	19.0476	NA
Atf5	7.87034	NA	6.47155	1.39879	4.53361	NA	7.59572	2.36682	5	NA	4	1	2.88018	NA	4.69484	1.69205
Atf6	14.4697	NA	6.31764	8.15203	1.93885	NA	3.20529	1.50351	12	NA	2	10	1.60793	NA	1.01471	1.84434
Atf6b	2.20871	NA	2.20871	NA	0.86076	NA	1.04135	NA	3	NA	3	NA	1.16913	NA	1.41443	NA
Atf7	3.56033	NA	3.56033	NA	1.24749	NA	2.86661	NA	4	NA	4	NA	1.40154	NA	3.22061	NA
Atf7ip	89.9077	0.738548	73.0365	16.1327	19.8603	6.15457	18.627	33.1948	46	1	37	8	10.1613	8.33333	9.43637	16.4609
Atg10	3.88623	NA	NA	3.88623	2.41531	NA	NA	4.25655	2	NA	NA	2	1.24301	NA	NA	2.19058
Atg101	16.0416	NA	10.6317	5.40991	13.042	NA	16.1822	20.6485	14	NA	12	2	11.3821	NA	18.2648	7.63359
Atg12	6.95251	NA	1.70835	5.24416	2.78993	NA	4.01021	2.57952	4	NA	2	2	1.60514	NA	4.69484	0.983768
Atg13	43.9024	NA	2.42052	41.4819	12.2873	NA	1.68092	23.3833	15	NA	2	13	4.19815	NA	1.38889	7.32807
Atg14	10.9506	NA	6.40392	4.5467	3.17317	NA	4.3299	2.33884	6	NA	4	2	1.73863	NA	2.70453	1.02881
Atg16l1	9.19118	NA	0.767928	8.42326	2.89031	NA	0.410218	7.52749	7	NA	1	6	2.20126	NA	0.534188	5.36193
Atg2a	28.968	NA	11.8224	17.1456	4.56909	NA	2.05786	36.7143	15	NA	8	7	2.36593	NA	1.39252	14.9893
Atg2b	14.3819	NA	6.97967	7.40221	1.41387	NA	1.12069	2.09516	12	NA	7	5	1.17971	NA	1.12396	1.41523
Atg3	2.43035	NA	0.755087	1.67527	1.20733	NA	0.799034	2.10197	2	NA	1	1	0.993542	NA	1.0582	1.25471
Atg4b	11.3372	NA	1.15959	10.1776	3.82495	NA	0.981041	5.75003	5	NA	2	3	1.68691	NA	1.69205	1.69492
Atg4c	35.5903	NA	4.09399	31.4963	11.199	NA	2.97312	25.7533	6	NA	1	5	1.88798	NA	0.726216	4.08831
Atg4d	35.5171	NA	10.6248	24.8923	11.7451	NA	7.45597	17.7675	17	NA	5	12	5.62169	NA	3.50877	8.56531
Atg5	5.68309	0.677127	NA	5.00596	2.41628	2.37588	NA	4.04032	5	NA	1	4	2.12585	NA	1.20773	3.22841
Atg7	6.32798	NA	2.56128	3.7667	1.56905	NA	1.16053	2.3675	3	NA	1	2	0.743863	NA	0.453104	1.25707
Atg9a	40.8247	10.7539	12.1176	17.9532	9.94027	9.14447	6.49391	16.8574	16	4	6	6	3.89579	3.40136	3.21543	5.6338
Athl1	7.21016	NA	7.21016	NA	2.42358	NA	3.47813	NA	5	NA	5	NA	1.68067	NA	2.41196	NA
Atic	5.55484	NA	3.23508	2.31975	2.12747	NA	1.81848	3.16906	8	NA	5	3	3.06396	NA	2.81057	4.09836
Atl2	36.8336	2.18763	13.2503	21.3957	8.87985	5.9935	8.91078	9.31867	24	2	8	14	5.78592	5.47945	5.37996	6.09756
Atl3	40.2819	NA	12.0424	28.2395	6.01312	NA	7.26757	6.17527	28	NA	9	19	4.17973	NA	5.4315	4.15482
Atm	94.3706	NA	22.9782	71.3924	7.88788	NA	2.49736	27.2075	14	NA	7	7	1.17018	NA	0.760787	2.66768
Atmin	120.355	NA	104.025	16.3297	24.678	NA	42.3382	6.84395	28	NA	21	7	5.74123	NA	8.54701	2.93378
Atn1	50.1336	0.739024	45.381	4.0135	11.4044	2.1736	12.8631	7.60132	39	1	34	4	8.8717	2.94118	9.63719	7.57576
Atoh8	6.4821	NA	NA	6.4821	2.75248	NA	NA	6.66197	1	NA	NA	1	0.424628	NA	NA	1.02775
Atox1	2.16809	NA	1.62082	0.547268	4.94997	NA	7.83005	2.9423	4	NA	3	1	9.13242	NA	14.4928	5.37634
Atp10a	59.223	NA	55.7762	3.44682	10.8289	NA	12.3208	5.00264	24	NA	23	1	4.38837	NA	5.08063	1.45138
Atp10b	16.4396	NA	NA	16.4396	2.37944	NA	NA	6.8929	3	NA	NA	3	0.434216	NA	NA	1.25786
Atp10d	82.9047	NA	81.9659	0.93887	13.7693	NA	18.5864	0.620946	14	NA	13	1	2.3252	NA	2.94785	0.661376
Atp11a	57.1757	NA	6.41573	50.76	7.68181	NA	1.80015	14.1748	37	NA	5	32	4.97111	NA	1.40292	8.93605
Atp11b	10.626	NA	8.29163	2.33435	2.18462	NA	2.35023	2.14161	14	NA	10	4	2.87829	NA	2.83447	3.66972
Atp11c	7.91501	NA	1.14905	6.76596	1.30892	NA	0.338953	2.69883	6	NA	1	5	0.992228	NA	0.294985	1.99442
Atp13a1	8.52428	NA	6.47573	2.04856	2.1779	NA	1.79732	9.35414	10	NA	9	1	2.55493	NA	2.49792	4.56621
Atp13a2	9.9118	NA	0.991516	8.92028	2.29069	NA	0.289748	12.5461	8	NA	2	6	1.84886	NA	0.584454	8.43882
Atp13a3	28.1645	NA	10.577	17.5874	3.85339	NA	2.82054	5.36201	35	NA	16	19	4.78862	NA	4.26667	5.79268
Atp1a1	20.0307	NA	15.8757	4.15506	5.41078	NA	5.16786	12.3296	45	NA	36	9	12.1556	NA	11.7188	26.7062
Atp1b3	38.3452	NA	4.04822	34.297	20.9422	NA	4.83658	40.3969	26	NA	7	19	14.1999	NA	8.3632	22.3793
Atp2a2	49.0915	NA	18.811	30.2805	9.27304	NA	5.97364	18.8663	41	NA	24	17	7.74462	NA	7.62147	10.5919
Atp2b1	67.1658	6.59548	26.8922	33.6781	9.42017	14.8882	7.34157	11.137	31	2	17	12	4.34783	4.51467	4.641	3.96825
Atp2b4	112.266	21.1869	25.8738	65.2058	13.5391	45.4654	7.3904	15.0765	97	17	32	48	11.698	36.4807	9.14025	11.0983
Atp2c1	31.3489	NA	3.95266	27.3962	5.95307	NA	1.39818	14.6582	12	NA	4	8	2.27877	NA	1.41493	4.28036
Atp5a1	19.6694	1.84697	14.963	2.85937	8.09107	6.52638	9.00303	5.88349	46	1	36	9	18.9223	3.53357	21.6606	18.5185
Atp5b	20.5411	NA	19.2256	1.31551	10.9319	NA	12.0916	4.89036	43	NA	39	4	22.8845	NA	24.5283	14.8699
Atp5c1	1.75711	NA	1.75711	NA	0.976173	NA	2.12983	NA	3	NA	3	NA	1.66667	NA	3.63636	NA
Atp5e	1.32578	0.52941	0.385175	0.411197	3.20237	5.042	2.42249	2.74131	3	1	1	1	7.24638	9.52381	6.28931	6.66667
Atp5f1	1.57804	NA	0.44494	1.1331	1.08382	NA	0.577095	9.21219	2	NA	1	1	1.37363	NA	1.29702	8.13008
Atp5g1	2.982	2.982	NA	NA	3.43549	20.4247	NA	NA	1	1	NA	NA	1.15207	6.84932	NA	NA
Atp5g3	4.26123	NA	2.97518	1.28605	6.27575	NA	6.98399	8.99339	7	NA	4	3	10.3093	NA	9.38967	20.979
Atp5h	1.15021	0.596759	0.553453	NA	2.00385	16.1286	1.13879	NA	2	1	1	NA	3.48432	27.027	2.05761	NA
Atp5j	3.32419	1.91083	1.41335	NA	4.38547	5.55475	4.32219	NA	3	1	2	NA	3.95778	2.90698	6.11621	NA
Atp5j2	2.91907	2.18227	0.736802	NA	6.11964	28.3411	2.75956	NA	3	1	2	NA	6.28931	12.987	7.49064	NA
Atp5k	1.41764	1.41764	NA	NA	4.85494	83.3907	NA	NA	1	1	NA	NA	3.42466	58.8235	NA	NA
Atp5l	2.26184	2.26184	NA	NA	4.40904	27.9239	NA	NA	1	1	NA	NA	1.94932	12.3457	NA	NA
Atp5o	3.78124	NA	1.60899	2.17225	4.89798	NA	2.50622	39.4954	3	NA	2	1	3.88601	NA	3.11526	18.1818
Atp5s	9.10919	NA	NA	9.10919	6.13414	NA	NA	11.0414	2	NA	NA	2	1.3468	NA	NA	2.42424
Atp5sl	42.1884	4.06895	2.41669	35.7028	17.3187	4.12672	3.05138	54.2596	11	NA	2	9	4.5156	NA	2.52525	13.6778
Atp6ap1	17.7038	NA	5.81626	11.8875	8.0876	NA	4.17835	16.6259	22	NA	12	10	10.0503	NA	8.62069	13.986
Atp6ap2	2.3299	NA	0.551597	1.7783	0.983909	NA	0.523833	1.50959	3	NA	1	2	1.26689	NA	0.949668	1.69779
Atp6v0a1	9.04156	NA	1.71998	7.32158	2.24524	NA	0.694943	5.58047	5	NA	2	3	1.24162	NA	0.808081	2.28659
Atp6v0a2	68.5467	NA	2.75259	65.7941	12.8244	NA	1.07063	24.8092	19	NA	4	15	3.55472	NA	1.55581	5.65611
Atp6v0b	0.440642	NA	0.440642	NA	0.442412	NA	0.713013	NA	1	NA	1	NA	1.00402	NA	1.61812	NA
Atp6v0c-ps2	0.399375	NA	0.399375	NA	Inf	NA	Inf	NA	1	NA	1	NA	Inf	NA	Inf	NA
Atp6v0d1	5.04756	NA	1.83544	3.21212	3.12156	NA	1.73811	7.41828	5	NA	2	3	3.09215	NA	1.89394	6.92841
Atp6v0e	14.5028	NA	NA	14.5028	18.2195	NA	NA	30.7914	10	NA	NA	10	12.5628	NA	NA	21.2314
Atp6v1a	11.7597	NA	2.91971	8.83996	2.98015	NA	1.57482	4.37622	12	NA	5	7	3.04105	NA	2.69687	3.46535
Atp6v1b1	14.9595	5.24786	2.32652	7.38509	7.76309	77.1744	1.50877	23.2968	11	3	5	3	5.70835	44.1176	3.24254	9.46372
Atp6v1b2	8.31114	NA	3.73551	4.57563	3.03216	NA	2.43197	3.98574	7	NA	2	5	2.55381	NA	1.30208	4.3554
Atp6v1c1	0.480861	NA	NA	0.480861	0.2292	NA	NA	0.652457	1	NA	NA	1	0.476644	NA	NA	1.35685
Atp6v1d	8.51138	NA	4.05524	4.45614	6.03644	NA	5.45059	9.15019	6	NA	2	4	4.25532	NA	2.68817	8.21355
Atp6v1e1	7.04676	NA	1.6793	5.36747	5.85279	NA	2.46593	11.7194	8	NA	3	5	6.64452	NA	4.40529	10.917
Atp6v1f	2.62817	1.24147	1.3867	NA	4.13884	36.5138	3.85193	NA	3	1	2	NA	4.72441	29.4118	5.55556	NA
Atp6v1h	2.04087	NA	1.37281	0.668062	1.03283	NA	0.945461	1.73974	4	NA	2	2	2.02429	NA	1.37741	5.20833
Atp7a	44.6428	NA	41.3395	3.30327	5.44557	NA	9.22963	0.931812	8	NA	7	1	0.975848	NA	1.56285	0.282087
Atp8a1	31.1226	NA	2.17201	28.9506	3.77243	NA	0.608577	6.49116	9	NA	1	8	1.09091	NA	0.280191	1.79372
Atp8b1	39.4946	NA	3.48244	36.0122	6.13271	NA	0.927168	15.2529	7	NA	2	5	1.08696	NA	0.532481	2.11775
Atp8b2	54.3237	NA	12.2473	42.0764	9.95487	NA	3.42774	25.1653	27	NA	10	17	4.94777	NA	2.79877	10.1675
Atp9a	8.15742	NA	3.66066	4.49676	2.09326	NA	1.15188	13.4634	10	NA	7	3	2.56608	NA	2.20264	8.98204
Atp9b	55.2613	NA	4.49534	50.766	10.1733	NA	1.30641	27.1186	25	NA	6	19	4.60236	NA	1.74368	10.1496
Atpaf2	9.91193	NA	3.49171	6.42022	5.32041	NA	3.89266	8.26283	8	NA	3	5	4.29415	NA	3.34448	6.43501
Atpif1	6.9541	1.02099	2.6129	3.32021	12.9019	11.2197	8.13987	26.1434	9	2	2	5	16.6976	21.978	6.23053	39.3701
Atr	19.2987	NA	19.2987	NA	2.39023	NA	2.43487	NA	10	NA	10	NA	1.23854	NA	1.26167	NA
Atrip	22.4513	NA	22.4513	NA	8.72913	NA	9.52134	NA	8	NA	8	NA	3.11042	NA	3.39271	NA
Atrn	29.4031	NA	NA	29.4031	3.36535	NA	NA	6.70537	14	NA	NA	14	1.60238	NA	NA	3.1927
Atrnl1	46.7475	NA	4.9169	41.8306	7.10125	NA	1.18852	19.6757	17	NA	6	11	2.58241	NA	1.45033	5.17404
Atrx	94.3172	NA	84.5483	9.76887	9.20707	NA	11.3778	3.81597	76	NA	66	10	7.41898	NA	8.88171	3.90625
Atxn1	35.3189	NA	16.169	19.1499	3.32977	NA	6.73707	2.62363	4	NA	2	2	0.377109	NA	0.833333	0.27401
Atxn10	13.4006	NA	4.81546	8.58512	5.52601	NA	3.37217	9.4032	17	NA	11	6	7.01031	NA	7.70308	6.57174
Atxn1l	96.9086	NA	83.9358	12.9728	12.8765	NA	40.6666	2.53673	24	NA	17	7	3.18894	NA	8.23643	1.36879
Atxn2	15.8391	NA	8.02464	7.81444	3.54183	NA	2.07838	13.3809	13	NA	6	7	2.90698	NA	1.554	11.9863
Atxn2l	16.2989	1.95049	11.0416	3.30683	4.38379	17.7317	3.50528	7.22015	19	1	16	2	5.11027	9.09091	5.07937	4.36681
Atxn3	26.5253	NA	NA	26.5253	4.90845	NA	NA	6.24712	10	NA	NA	10	1.85048	NA	NA	2.35516
Atxn7	95.9225	NA	40.3632	55.5593	13.9992	NA	15.5005	13.9701	28	NA	13	15	4.0864	NA	4.99232	3.77169
Atxn7l1	19.9471	NA	17.0712	2.87589	4.66272	NA	6.41534	2.00131	5	NA	4	1	1.16877	NA	1.50319	0.695894
Atxn7l2	9.56562	NA	9.56562	NA	3.63573	NA	4.57466	NA	5	NA	5	NA	1.90042	NA	2.3912	NA
Atxn7l3	35.5138	NA	3.84059	31.6732	9.58019	NA	3.60619	13.4493	14	NA	5	9	3.77664	NA	4.69484	3.82166
Atxn7l3b	79.9282	1.98116	9.45596	68.4911	22.2085	6.51697	32.1631	22.8228	42	1	6	35	11.6699	3.28947	20.4082	11.6628
AU019823	28.6427	NA	14.6992	13.9435	8.56796	NA	16.7226	6.3611	10	NA	7	3	2.99133	NA	7.96359	1.36861
AU022252	38.5244	NA	3.54693	34.9775	20.6344	NA	5.91155	29.0511	8	NA	1	7	4.28495	NA	1.66667	5.81395
AU022754	12.3712	NA	12.3712	NA	Inf	NA	Inf	NA	2	NA	2	NA	Inf	NA	Inf	NA
AU040320	31.7247	NA	18.7078	13.0169	6.36787	NA	5.61122	10.122	17	NA	8	9	3.41228	NA	2.39952	6.99844
AU041133	7.60462	NA	NA	7.60462	2.8871	NA	NA	7.21501	1	NA	NA	1	0.379651	NA	NA	0.948767
Auh	0.979779	NA	NA	0.979779	0.72846	NA	NA	2.6917	1	NA	NA	1	0.743494	NA	NA	2.74725
Aup1	8.88037	NA	7.57135	1.30902	5.87715	NA	5.73587	8.84476	8	NA	7	1	5.29451	NA	5.30303	6.75676
Aurka	18.4626	NA	7.01236	11.4503	9.34816	NA	5.61438	18.8948	8	NA	3	5	4.05063	NA	2.40192	8.25083
Aurkaip1	5.83777	NA	3.40034	2.43743	4.82859	NA	5.63903	22.9947	4	NA	3	1	3.30852	NA	4.97512	9.43396
Aurkb	6.92202	NA	6.92202	NA	3.53705	NA	6.66861	NA	4	NA	4	NA	2.04394	NA	3.85356	NA
Auts2	93.8033	NA	68.9927	24.8107	15.4817	NA	18.2279	14.1452	45	NA	32	13	7.42697	NA	8.45443	7.41163
AV039307	5.40802	NA	NA	5.40802	Inf	NA	NA	Inf	3	NA	NA	3	Inf	NA	NA	Inf
Aven	1.93418	NA	1.93418	NA	1.27165	NA	1.81955	NA	1	NA	1	NA	0.657462	NA	0.940734	NA
Avl9	24.7212	NA	16.5611	8.16015	3.6947	NA	8.49286	1.80375	12	NA	8	4	1.79345	NA	4.10256	0.884173
Avpi1	19.9649	NA	6.20331	13.7616	20.4558	NA	14.4599	33.2406	12	NA	8	4	12.2951	NA	18.648	9.66184
AW011738	4.65159	NA	4.65159	NA	Inf	NA	Inf	NA	1	NA	1	NA	Inf	NA	Inf	NA
AW146154	1.87849	NA	NA	1.87849	0.550716	NA	NA	1.33226	1	NA	NA	1	0.293169	NA	NA	0.70922
AW209491	46.067	5.94564	37.4605	2.66092	22.7716	15.4834	29.5896	7.13384	9	1	7	1	4.44884	2.60417	5.52923	2.68097
AW549877	54.4076	NA	20.3761	34.0315	10.7017	NA	23.0239	8.17867	22	NA	5	17	4.3273	NA	5.64972	4.08556
AW554918	52.3318	NA	36.8754	15.4564	9.77982	NA	20.0519	4.41613	8	NA	6	2	1.49505	NA	3.26264	0.571429
Axin1	59.1078	2.51763	52.8393	3.7508	15.6411	5.96594	20.2683	5.00107	27	1	22	4	7.14475	2.36967	8.43882	5.33333
Axin2	97.0989	6.39359	50.1857	40.5196	22.8039	18.3198	19.8913	29.2349	48	2	24	22	11.2729	5.73066	9.51249	15.873
Axl	10.1733	NA	6.5852	3.58808	2.00104	NA	2.46914	1.65961	12	NA	6	6	2.36035	NA	2.24972	2.77521
Azi2	47.9387	NA	24.02	23.9187	7.15182	NA	24.0681	4.85955	24	NA	15	9	3.58049	NA	15.0301	1.82852
Azin1	11.9419	2.62833	2.41293	6.90061	2.37507	3.50444	1.79133	2.35435	14	2	3	9	2.78441	2.66667	2.22717	3.07062
B130034C11Rik	1.12809	NA	1.12809	NA	Inf	NA	Inf	NA	1	NA	1	NA	Inf	NA	Inf	NA
B230217O12Rik	2.9751	NA	2.9751	NA	Inf	NA	Inf	NA	1	NA	1	NA	Inf	NA	Inf	NA
B230219D22Rik	60.7909	NA	20.1667	40.6242	13.0677	NA	35.5673	10.5299	43	NA	15	28	9.24334	NA	26.455	7.25765
B3galnt2	21.9034	NA	3.08308	18.8203	5.9504	NA	2.03504	9.24833	16	NA	2	14	4.34664	NA	1.32013	6.87961
B3galt6	33.0743	NA	11.97	21.1043	10.2939	NA	12.2392	9.71207	8	NA	3	5	2.48988	NA	3.06748	2.30097
B3gat2	7.47795	NA	5.08707	2.39088	1.71709	NA	5.2175	0.895126	5	NA	2	3	1.14811	NA	2.05128	1.12317
B3gat3	9.63004	NA	5.39156	4.23848	6.07957	NA	5.34877	10.5435	5	NA	3	2	3.15657	NA	2.97619	4.97512
B3glct	10.9136	NA	2.911	8.0026	2.40229	NA	1.98027	2.67377	4	NA	1	3	0.880475	NA	0.680272	1.00234
B3gnt1	26.3249	NA	26.3249	NA	12.936	NA	21.0936	NA	9	NA	9	NA	4.4226	NA	7.21154	NA
B3gnt2	76.9986	NA	66.5821	10.4165	27.3238	NA	55.7639	8.30665	23	NA	18	5	8.16182	NA	15.0754	3.98724
B3gnt8	45.9558	6.24293	31.5519	8.16095	24.6148	11.9368	26.9675	46.902	11	2	8	1	5.89181	3.82409	6.83761	5.74713
B3gnt9	4.67126	NA	4.67126	NA	1.85662	NA	3.89272	NA	1	NA	1	NA	0.397456	NA	0.833333	NA
B3gntl1	31.2714	NA	NA	31.2714	10.9686	NA	NA	18.8609	6	NA	NA	6	2.10452	NA	NA	3.61882
B4galnt1	18.2574	1.78243	5.34755	11.1274	5.55105	4.13557	3.0875	9.88226	11	1	3	7	3.34448	2.32019	1.7321	6.2167
B4galnt3	15.6258	NA	15.6258	NA	5.2772	NA	5.2772	NA	1	NA	1	NA	0.337724	NA	0.337724	NA
B4galnt4	13.2736	NA	13.2736	NA	4.27492	NA	4.27492	NA	2	NA	2	NA	0.644122	NA	0.644122	NA
B4galt1	47.6474	NA	12.2942	35.3532	10.5066	NA	10.2452	13.5817	34	NA	10	24	7.49724	NA	8.33333	9.22013
B4galt2	13.8646	NA	4.14339	9.72125	5.62004	NA	3.73278	11.3965	5	NA	1	4	2.02675	NA	0.900901	4.68933
B4galt3	10.4578	NA	1.35137	9.1064	5.23412	NA	1.13751	17.6481	8	NA	5	3	4.004	NA	4.20875	5.81395
B4galt7	20.9099	NA	4.81695	16.0929	13.1014	NA	4.89527	27.7464	4	NA	1	3	2.50627	NA	1.01626	5.17241
B630005N14Rik	29.3979	NA	18.1221	11.2758	7.09923	NA	14.9523	4.03282	9	NA	5	4	2.17339	NA	4.12541	1.43062
B630019K06Rik	1.69958	NA	1.69958	NA	Inf	NA	Inf	NA	1	NA	1	NA	Inf	NA	Inf	NA
B930041F14Rik	30.496	NA	NA	30.496	14.2372	NA	NA	23.2616	3	NA	NA	3	1.40056	NA	NA	2.28833
B930059L03Rik	3.88236	NA	3.88236	NA	Inf	NA	Inf	NA	1	NA	1	NA	Inf	NA	Inf	NA
B9d2	43.768	NA	NA	43.768	42.8678	NA	NA	165.788	6	NA	NA	6	5.87659	NA	NA	22.7273
Baalc	16.3075	NA	NA	16.3075	4.11079	NA	NA	4.42178	1	NA	NA	1	0.25208	NA	NA	0.27115
Babam1	3.08962	NA	NA	3.08962	1.94072	NA	NA	8.26102	2	NA	NA	2	1.25628	NA	NA	5.34759
Bace1	76.3051	16.9945	11.2125	48.0981	18.1939	34.0571	7.4452	21.9726	17	2	3	12	4.05341	4.00802	1.99203	5.48196
Bach1	134.983	NA	73.6166	61.3667	23.0426	NA	33.1606	17.6595	60	NA	32	28	10.2424	NA	14.4144	8.05755
Bach2	129.776	NA	106.381	23.3951	15.2803	NA	42.2145	4.02531	25	NA	17	8	2.9436	NA	6.74603	1.37646
Bad	7.52147	NA	NA	7.52147	4.94508	NA	NA	19.7414	3	NA	NA	3	1.97239	NA	NA	7.87402
Bag1	0.414304	NA	0.414304	NA	0.307119	NA	0.627733	NA	1	NA	1	NA	0.74129	NA	1.51515	NA
Bag2	13.7666	NA	13.7666	NA	7.5849	NA	21.7482	NA	2	NA	2	NA	1.10193	NA	3.15956	NA
Bag3	57.2514	3.99806	27.2026	26.0508	22.0792	14.4857	15.6877	44.6841	29	5	16	8	11.184	18.1159	9.22722	13.7221
Bag4	92.5788	NA	15.1737	77.4051	19.2993	NA	11.0435	22.8671	20	NA	6	14	4.16927	NA	4.36681	4.13589
Bag5	72.4319	2.35125	66.4126	3.66811	33.9101	9.87922	49.4141	6.62113	20	NA	18	2	9.3633	NA	13.3929	3.61011
Bag6	15.6954	NA	14.9104	0.78503	3.86015	NA	4.17306	9.12826	33	NA	32	1	8.11608	NA	8.95606	11.6279
Bahcc1	125.627	NA	111.177	14.45	11.7113	NA	14.0162	5.98592	36	NA	31	5	3.35602	NA	3.90822	2.07125
Bahd1	63.9855	5.81209	43.6887	14.4847	14.4502	37.0197	18.8395	7.42044	19	NA	9	10	4.29088	NA	3.88098	5.12295
Bai2	52.1002	NA	34.7257	17.3746	9.47794	NA	7.31221	58.8968	11	NA	9	2	2.00109	NA	1.89514	6.77966
Baiap2	23.8032	NA	NA	23.8032	6.5937	NA	NA	12.7426	13	NA	1	12	3.60111	NA	0.610128	6.42398
Baiap2l1	28.3851	NA	26.6681	1.71697	8.73924	NA	17.2609	1.199	6	NA	5	1	1.84729	NA	3.23625	0.698324
Bambi	19.3273	NA	14.3647	4.96257	3.83478	NA	18.3457	1.2394	5	NA	4	1	0.992063	NA	5.10856	0.24975
Banf1	2.73849	0.642617	0.414903	1.68097	2.26509	1.14753	1.53668	4.43528	4	NA	2	2	3.30852	NA	7.40741	5.27704
Banp	7.59436	NA	1.86341	5.73094	1.38129	NA	1.1314	1.58095	5	NA	2	3	0.909422	NA	1.21433	0.827586
Bap1	27.3766	NA	5.65947	21.7171	8.03775	NA	2.58778	19.9239	19	NA	5	14	5.57839	NA	2.28624	12.844
Bard1	6.4281	NA	NA	6.4281	1.1799	NA	NA	2.15347	1	NA	NA	1	0.183554	NA	NA	0.335008
Barx2	27.1265	1.01011	12.2142	13.9021	15.146	5.20674	14.3359	18.6606	24	NA	16	8	13.4003	NA	18.7793	10.7383
Basp1	14.9258	NA	4.25197	10.6738	8.04624	NA	6.24371	11.212	4	NA	1	3	2.15633	NA	1.46843	3.15126
Bax	9.07743	2.48459	NA	6.59283	10.4458	20.2	NA	39.4781	3	NA	1	2	3.45224	NA	1.72712	11.976
Baz1a	14.8734	NA	14.8734	NA	2.4071	NA	3.19241	NA	8	NA	8	NA	1.29471	NA	1.71711	NA
Baz1b	61.2828	NA	48.2187	13.0641	9.52631	NA	10.8601	7.84157	34	NA	28	6	5.28525	NA	6.30631	3.60144
Baz2a	58.243	NA	39.5669	18.6761	6.95938	NA	6.98569	7.32396	38	NA	21	17	4.54057	NA	3.70763	6.66667
Baz2b	59.8066	3.17262	43.624	13.0099	7.49456	9.85285	6.84621	10.1166	43	2	31	10	5.38847	6.21118	4.86503	7.77605
Bbc3	64.0663	1.74463	1.88308	60.4386	32.4222	5.93411	3.23553	54.9442	11	1	4	6	5.5668	3.40136	6.87285	5.45455
Bbs1	34.2811	NA	NA	34.2811	6.12491	NA	NA	9.04515	7	NA	NA	7	1.25067	NA	NA	1.84697
Bbs12	100.605	NA	100.605	NA	41.3333	NA	54.1471	NA	9	NA	9	NA	3.69762	NA	4.84392	NA
Bbs4	3.01982	NA	NA	3.01982	1.18797	NA	NA	3.34051	1	NA	NA	1	0.393391	NA	NA	1.10619
Bbs9	0.704376	NA	0.704376	NA	0.20488	NA	0.266506	NA	2	NA	2	NA	0.581734	NA	0.756716	NA
Bbx	63.8314	NA	7.39453	56.4369	7.30169	NA	2.71458	9.87522	22	NA	4	18	2.51659	NA	1.46843	3.14961
BC003331	8.10754	NA	0.731073	7.37647	2.50078	NA	0.543953	4.88508	4	NA	1	3	1.23381	NA	0.744048	1.98675
BC003965	54.5472	NA	2.49298	52.0542	18.0441	NA	6.06564	20.3019	14	NA	2	12	4.63116	NA	4.86618	4.68019
BC004004	2.88751	NA	0.497145	2.39037	1.02795	NA	0.474828	1.66344	3	NA	1	2	1.068	NA	0.95511	1.39179
BC005537	16.5872	9.25123	1.80264	5.53337	6.50225	5.36614	2.61253	40.3896	20	9	5	6	7.84006	5.22042	7.24638	43.7956
BC005561	123.49	14.3128	109.177	NA	23.8351	34.8243	22.8882	NA	20	1	19	NA	3.86026	2.43309	3.98323	NA
BC005624	2.34323	2.34323	NA	NA	1.76448	28.9288	NA	NA	1	1	NA	NA	0.753012	12.3457	NA	NA
BC017643	64.8387	NA	NA	64.8387	25.0343	NA	NA	39.5117	24	NA	NA	24	9.26641	NA	NA	14.6252
BC018507	158.402	NA	154.388	4.01473	20.6387	NA	22.9539	4.40211	63	NA	60	3	8.20847	NA	8.92061	3.28947
BC022687	14.7412	7.99824	6.74296	NA	7.69775	19.3194	6.98029	NA	3	1	2	NA	1.56658	2.41546	2.07039	NA
BC023829	15.8984	NA	1.17523	14.7232	7.99316	NA	1.21282	14.8419	8	NA	3	5	4.02212	NA	3.09598	5.04032
BC024978	18.2159	NA	9.52838	8.68751	6.60954	NA	8.71764	7.07452	3	NA	2	1	1.08853	NA	1.82983	0.814332
BC025920	7.55447	NA	7.55447	NA	Inf	NA	Inf	NA	1	NA	1	NA	Inf	NA	Inf	NA
BC026585	5.01392	NA	5.01392	NA	3.88978	NA	4.76156	NA	2	NA	2	NA	1.55159	NA	1.89934	NA
BC027231	33.628	NA	28.6174	5.01059	11.7334	NA	16.8834	4.51812	13	NA	9	4	4.53594	NA	5.30973	3.60685
BC029722	21.2185	NA	21.2185	NA	Inf	NA	Inf	NA	6	NA	6	NA	Inf	NA	Inf	NA
BC030307	5.30234	NA	5.30234	NA	1.05393	NA	1.32658	NA	1	NA	1	NA	0.198768	NA	0.250188	NA
BC030336	26.8851	NA	15.2971	11.5879	5.55247	NA	30.3515	2.76364	9	NA	3	6	1.85874	NA	5.95238	1.43096
BC030867	15.5119	NA	10.0977	5.41417	6.09984	NA	5.46414	11.1174	4	NA	3	1	1.57295	NA	1.62338	2.05339
BC031181	2.90116	NA	NA	2.90116	2.77093	NA	NA	4.91723	2	NA	NA	2	1.91022	NA	NA	3.38983
BC037032	0.53	0.53	NA	NA	Inf	Inf	NA	NA	1	1	NA	NA	Inf	Inf	NA	NA
BC048403	59.7381	NA	50.6441	9.09407	19.1653	NA	37.8506	5.22648	10	NA	8	2	3.20821	NA	5.97907	1.14943
BC048609	5.4465	NA	NA	5.4465	10.1425	NA	NA	67.2408	1	NA	NA	1	1.8622	NA	NA	12.3457
BC052040	10.1928	NA	NA	10.1928	3.6797	NA	NA	5.86804	3	NA	NA	3	1.08303	NA	NA	1.72712
BC053749	16.6937	NA	12.3545	4.33925	6.76955	NA	6.48528	11.3891	10	NA	8	2	4.05515	NA	4.19948	5.24934
BC055324	1.31608	NA	1.31608	NA	0.45226	NA	0.48528	NA	1	NA	1	NA	0.343643	NA	0.368732	NA
BC068281	44.3036	NA	44.3036	NA	13.9627	NA	21.0668	NA	4	NA	4	NA	1.26064	NA	1.90204	NA
Bc1	718.123	42.0086	271.747	404.368	Inf	Inf	Inf	Inf	409	18	221	170	Inf	Inf	Inf	Inf
BC100530	0.819039	NA	0.819039	NA	1.85723	NA	2.78585	NA	3	NA	3	NA	6.80272	NA	10.2041	NA
BC117090	1.97797	NA	1.97797	NA	5.11103	NA	6.79714	NA	1	NA	1	NA	2.58398	NA	3.43643	NA
Bcam	21.9014	1.12784	12.4231	8.35048	9.09904	18.1909	6.6469	17.543	44	1	32	11	18.28	16.129	17.1215	23.1092
Bcap29	2.02526	NA	0.469703	1.55555	1.00859	NA	0.649658	1.57445	2	NA	1	1	0.996016	NA	1.38313	1.01215
Bcap31	5.47648	NA	3.59544	1.88104	4.5111	NA	4.87187	5.02952	6	NA	4	2	4.94234	NA	5.42005	5.34759
Bcar1	80.911	NA	55.1111	25.7999	24.6755	NA	20.8992	63.3905	17	NA	11	6	5.18451	NA	4.17141	14.742
Bcar3	23.7355	NA	23.7355	NA	7.19258	NA	9.63683	NA	12	NA	12	NA	3.63636	NA	4.87211	NA
Bcas2	12.897	NA	7.08707	5.80994	9.1274	NA	10.4529	8.6329	11	NA	6	5	7.78485	NA	8.84956	7.42942
Bcas3	1.0089	NA	1.0089	NA	0.275959	NA	0.362004	NA	1	NA	1	NA	0.273523	NA	0.358809	NA
Bcat2	6.85557	NA	1.94564	4.90993	3.11051	NA	1.79156	13.4151	5	NA	3	2	2.2686	NA	2.76243	5.46448
Bccip	8.35484	1.26299	3.25537	3.83648	6.71611	50.5194	3.42311	14.3152	6	1	3	2	4.82315	40	3.15457	7.46269
Bcdin3d	69.5668	NA	39.3538	30.2131	54.7339	NA	45.8669	80.5682	12	NA	7	5	9.44138	NA	8.15851	13.3333
Bckdha	8.52746	NA	2.296	6.23146	4.80962	NA	1.71216	15.1617	8	NA	5	3	4.51213	NA	3.72856	7.29927
Bckdhb	1.23343	NA	NA	1.23343	0.882285	NA	NA	4.40512	1	NA	NA	1	0.715308	NA	NA	3.57143
Bckdk	20.6261	2.25692	3.51687	14.8523	7.21948	8.51668	2.83848	10.9773	12	1	6	5	4.20021	3.77358	4.84262	3.69549
Bcl10	27.4469	NA	17.1327	10.3142	14.025	NA	24.4055	9.74879	21	NA	12	9	10.7307	NA	17.094	8.50662
Bcl11a	145.09	1.36617	102.148	41.5761	20.677	2.84027	40.8756	10.2988	65	1	41	23	9.26322	2.079	16.4066	5.6973
Bcl11b	238.694	NA	93.6875	145.006	30.1267	NA	35.2872	29.0186	111	NA	49	62	14.0098	NA	18.4557	12.4074
Bcl2	143.72	64.9598	26.8886	51.8712	18.5732	46.0708	36.5831	9.27431	33	12	7	14	4.26467	8.51064	9.52381	2.50313
Bcl2l1	37.2013	4.63961	17.3488	15.2129	11.6436	8.13967	20.5069	8.55139	12	2	3	7	3.75587	3.50877	3.5461	3.93479
Bcl2l11	20.1846	NA	NA	20.1846	2.82816	NA	NA	3.35404	5	NA	NA	5	0.700574	NA	NA	0.830841
Bcl2l13	39.9674	NA	17.7517	22.2157	5.76481	NA	13.6028	4.07553	32	NA	11	21	4.61561	NA	8.42912	3.8525
Bcl2l2	6.7054	NA	4.27338	2.43202	1.93742	NA	7.34258	0.900416	6	NA	3	3	1.7336	NA	5.15464	1.1107
Bcl3	11.4263	NA	1.15324	10.2731	6.22689	NA	0.856153	25.0564	4	NA	1	3	2.17984	NA	0.74239	7.31707
Bcl6	37.5694	NA	31.526	6.04342	11.4367	NA	14.8428	5.63226	21	NA	18	3	6.39269	NA	8.47458	2.7959
Bcl7a	107.015	NA	3.20522	103.81	28.0953	NA	5.06354	34.6726	49	NA	2	47	12.8643	NA	3.15956	15.6981
Bcl7b	18.568	NA	NA	18.568	11.1453	NA	NA	20.1389	6	NA	NA	6	3.60144	NA	NA	6.50759
Bcl9	158.819	1.40758	132.132	25.28	26.0274	2.24853	30.8864	21.1018	53	1	46	6	8.68568	1.59744	10.7527	5.00835
Bcl9l	203.945	NA	196.695	7.25032	38.278	NA	43.8561	11.5267	85	NA	81	4	15.9535	NA	18.0602	6.3593
Bclaf1	41.5916	NA	30.6967	10.8949	7.62589	NA	11.122	4.45781	45	NA	28	17	8.25083	NA	10.1449	6.95581
Bcor	51.6504	3.88397	43.7942	3.97223	7.3681	4.61279	8.29435	4.47324	34	1	31	2	4.85021	1.18765	5.87121	2.25225
Bcorl1	110.528	NA	75.8206	34.7077	18.0454	NA	14.1827	65.6099	11	NA	9	2	1.79592	NA	1.6835	3.78072
Bcr	55.2765	2.37717	16.7618	36.1376	8.45595	18.286	4.39595	13.9312	24	NA	9	15	3.67141	NA	2.36035	5.78258
Bcs1l	3.16603	NA	3.16603	NA	1.73102	NA	2.51872	NA	1	NA	1	NA	0.546747	NA	0.795545	NA
Bdh1	17.1399	NA	11.496	5.64385	5.14248	NA	11.1396	3.12333	8	NA	4	4	2.40024	NA	3.87597	2.21361
Bdkrb2	36.4859	NA	28.6604	7.82548	21.7178	NA	24.3091	20.014	7	NA	5	2	4.16667	NA	4.24088	5.11509
Bdp1	51.5347	3.64512	31.9345	15.9551	5.1945	15.7117	4.31314	6.98254	23	1	14	8	2.31831	4.31034	1.89087	3.50109
Becn1	3.2362	NA	3.2362	NA	1.5934	NA	2.40252	NA	4	NA	4	NA	1.96947	NA	2.96956	NA
Begain	19.0415	NA	18.3655	0.676032	7.02122	NA	9.87393	0.842933	3	NA	2	1	1.10619	NA	1.07527	1.24688
Bend3	63.423	NA	24.0115	39.4115	10.4849	NA	9.68986	11.846	12	NA	7	5	1.9838	NA	2.82486	1.50286
Bet1	3.90003	1.23375	NA	2.66628	2.66032	9.34657	NA	2.72905	3	1	NA	2	2.04638	7.57576	NA	2.04708
Bet1l	50.2936	4.38088	NA	45.9127	32.4057	30.4228	NA	42.8291	16	NA	1	15	10.3093	NA	2.97619	13.9925
Bex1	3.04188	NA	3.04188	NA	3.51256	NA	7.86015	NA	2	NA	2	NA	2.30947	NA	5.16796	NA
Bex2	4.26131	NA	NA	4.26131	4.72429	NA	NA	17.1827	1	NA	NA	1	1.10865	NA	NA	4.03226
Bfar	39.5201	9.74135	17.6725	12.1062	13.1602	33.0215	13.0617	8.93449	7	1	4	2	2.331	3.38983	2.95639	1.47601
Bgn	6.76836	NA	0.937065	5.8313	2.83314	NA	0.844203	5.11517	5	NA	1	4	2.09293	NA	0.900901	3.50877
Bhlhb9	9.27084	8.17278	1.09806	NA	3.28171	10.4245	0.677814	NA	3	2	1	NA	1.06195	2.55102	0.617284	NA
Bhlhe40	43.3017	NA	31.648	11.6537	13.9099	NA	25.6052	7.31557	26	NA	20	6	8.35207	NA	16.1812	3.76648
Bicd2	42.5864	NA	18.104	24.4824	6.7044	NA	7.51515	6.66368	27	NA	13	14	4.25063	NA	5.39643	3.81056
Bid	1.15074	NA	NA	1.15074	0.608536	NA	NA	0.990311	1	NA	NA	1	0.528821	NA	NA	0.860585
Bin3	12.3236	NA	1.94495	10.3786	7.13582	NA	2.55243	11.2689	6	NA	1	5	3.47423	NA	1.31234	5.42888
Birc2	85.9926	12.084	60.5801	13.3285	27.3862	15.5522	32.9419	25.436	47	5	35	7	14.9682	6.43501	19.0321	13.3588
Birc3	68.6362	2.90337	45.3023	20.4305	24.417	6.59857	25.0427	36.3532	23	1	17	5	8.18214	2.27273	9.39746	8.8968
Birc5	18.8075	NA	1.31343	17.4941	5.5057	NA	3.5886	5.95846	10	NA	2	8	2.9274	NA	5.46448	2.7248
Birc6	126.795	NA	119.448	7.34692	8.04129	NA	8.16907	7.5508	77	NA	71	6	4.88331	NA	4.8557	6.1665
Bivm	86.7006	2.52713	38.2441	45.9294	24.2791	5.83634	25.344	28.1948	9	1	5	3	2.5203	2.30947	3.31345	1.84162
Blcap	20.6326	NA	NA	20.6326	9.91951	NA	NA	13.503	7	NA	NA	7	3.36538	NA	NA	4.58115
Blm	54.5698	NA	54.5698	NA	11.0331	NA	12.8218	NA	15	NA	15	NA	3.03275	NA	3.52444	NA
Blmh	20.2381	6.11449	4.83062	9.29302	8.59369	27.1755	3.53115	12.1956	20	1	9	10	8.49257	4.44444	6.57895	13.1234
Bloc1s3	34.8716	NA	27.3468	7.52479	19.0139	NA	46.5081	6.21884	6	NA	3	3	3.27154	NA	5.10204	2.47934
Bloc1s4	26.1762	NA	4.22493	21.9513	20.043	NA	6.51996	35.1783	5	NA	1	4	3.82848	NA	1.54321	6.41026
Bloc1s5	4.32209	NA	0.641236	3.68085	2.44324	NA	1.14917	3.22034	3	NA	1	2	1.69587	NA	1.79211	1.74978
Bloc1s6	1.56354	NA	NA	1.56354	0.447492	NA	NA	0.547265	1	NA	NA	1	0.286205	NA	NA	0.350018
Blvra	6.00527	NA	6.00527	NA	5.13271	NA	6.76269	NA	2	NA	2	NA	1.7094	NA	2.25225	NA
Blvrb	0.644682	NA	NA	0.644682	0.645974	NA	NA	6.19887	1	NA	1	NA	1.002	NA	2.26244	NA
Blzf1	12.2772	NA	11.65	0.62719	3.04267	NA	9.44849	0.258528	5	NA	4	1	1.23916	NA	3.24412	0.412201
Bmf	87.6263	NA	NA	87.6263	18.9135	NA	NA	23.0535	15	NA	NA	15	3.23764	NA	NA	3.94633
Bmi1	28.998	4.86629	3.11586	21.0158	8.06844	10.3318	3.19576	9.7839	7	1	2	4	1.94769	2.12314	2.05128	1.8622
Bmp1	34.2346	NA	23.0663	11.1683	9.10736	NA	7.75078	19.9433	41	NA	31	10	10.9072	NA	10.4167	17.8571
Bmp2	142.244	32.7044	70.8108	38.7292	39.8891	27.2537	59.756	32.7936	62	22	22	18	17.3864	18.3333	18.5654	15.2413
Bmp2k	143.295	NA	84.3208	58.9745	21.8172	NA	24.6768	20.2522	17	NA	10	7	2.58831	NA	2.92654	2.40385
Bmp4	38.605	NA	38.605	NA	19.3606	NA	31.4629	NA	9	NA	9	NA	4.51354	NA	7.33496	NA
Bmp7	48.7908	5.41137	15.932	27.4474	13.2945	21.4737	12.3217	12.9164	49	3	24	22	13.3515	11.9048	18.5615	10.3529
Bmpr1a	65.7285	1.49312	6.90227	57.3332	11.9921	3.67765	4.31662	16.494	39	2	7	30	7.11549	4.92611	4.37774	8.63061
Bmpr1b	61.1442	1.51291	15.6474	43.9839	10.4879	1.73898	10.5654	12.6427	24	NA	9	15	4.11664	NA	6.07698	4.31158
Bmpr2	92.4083	19.1583	46.2484	27.0016	8.33483	51.2254	14.8375	3.55471	53	5	31	17	4.78037	13.369	9.94546	2.23802
Bms1	21.4308	NA	7.24167	14.1891	4.99785	NA	1.87851	52.5523	9	NA	5	4	2.09888	NA	1.29702	14.8148
Bmyc	27.0344	NA	16.1542	10.8801	32.1455	NA	31.4897	38.7194	6	NA	4	2	7.13436	NA	7.79727	7.11744
Bnc1	105.279	NA	89.0217	16.2573	22.5775	NA	29.9434	9.67122	50	NA	43	7	10.7227	NA	14.4635	4.16419
Bnc2	95.6615	NA	78.9714	16.69	14.8243	NA	25.4829	5.14331	28	NA	24	4	4.33907	NA	7.74443	1.23267
Bnip1	30.0997	NA	3.60734	26.4923	27.7416	NA	5.25086	68.9905	10	NA	2	8	9.21659	NA	2.91121	20.8333
Bnip2	11.9648	NA	1.93385	10.0309	2.06076	NA	1.9713	2.20751	11	NA	2	9	1.89459	NA	2.03874	1.98063
Bnip3	4.48331	4.48331	NA	NA	2.55314	39.6753	NA	NA	1	1	NA	NA	0.569476	8.84956	NA	NA
Bnip3l	8.32959	NA	NA	8.32959	2.57324	NA	NA	3.34925	7	NA	NA	7	2.1625	NA	NA	2.81464
Bnipl	1.98315	NA	1.98315	NA	1.10915	NA	1.85168	NA	2	NA	2	NA	1.11857	NA	1.86741	NA
Boc	25.6442	NA	13.7014	11.9428	5.79138	NA	4.11083	21.0632	22	NA	12	10	4.96838	NA	3.60036	17.6367
Bod1	16.4985	NA	1.02925	15.4693	11.7679	NA	1.97175	21.515	9	NA	1	8	6.4194	NA	1.91571	11.1266
Bod1l	173.912	NA	161.801	12.111	16.5034	NA	17.7823	9.37384	49	NA	44	5	4.64984	NA	4.8357	3.86997
Bok	0.889027	NA	0.449591	0.439436	0.620829	NA	0.700297	0.732393	2	NA	1	1	1.39665	NA	1.55763	1.66667
Bola1	5.07831	NA	2.03003	3.04828	6.96614	NA	4.90346	11.0847	3	NA	3	NA	4.11523	NA	7.24638	NA
Bola2	2.20616	NA	NA	2.20616	6.54646	NA	NA	56.5681	1	NA	NA	1	2.96736	NA	NA	25.641
Bop1	1.39663	NA	1.39663	NA	0.564065	NA	0.635118	NA	2	NA	2	NA	0.807754	NA	0.909504	NA
Bora	27.1572	NA	21.954	5.20315	11.8435	NA	13.9126	13.1393	10	NA	7	3	4.3611	NA	4.43599	7.57576
Bpgm	13.1388	NA	9.5771	3.56167	6.35337	NA	12.2783	3.06776	4	NA	3	1	1.93424	NA	3.84615	0.861326
Bphl	7.99229	NA	NA	7.99229	6.61066	NA	NA	25.6987	3	NA	NA	3	2.48139	NA	NA	9.6463
Bpnt1	7.87347	NA	1.90747	5.966	3.60837	NA	2.05768	5.2196	3	NA	1	2	1.37489	NA	1.07875	1.74978
Bptf	176.339	NA	142.076	34.2636	15.3499	NA	16.2076	12.5876	90	NA	71	19	7.83426	NA	8.09948	6.98016
Braf	16.1339	NA	NA	16.1339	1.6585	NA	NA	2.25807	11	NA	NA	11	1.13076	NA	NA	1.53954
Brap	23.0551	0.560384	2.74585	19.7489	5.55411	0.647095	1.79702	11.2401	28	1	4	23	6.74536	1.15473	2.6178	13.0905
Brat1	20.4905	NA	20.4905	NA	5.87963	NA	7.92057	NA	4	NA	4	NA	1.14778	NA	1.54619	NA
Brca1	82.5266	NA	77.5271	4.99951	12.4137	NA	14.2539	4.98455	18	NA	17	1	2.70758	NA	3.12557	0.997009
Brca2	205.529	NA	205.529	NA	18.4613	NA	20.5735	NA	32	NA	32	NA	2.87434	NA	3.2032	NA
Brd1	67.9034	NA	62.5674	5.33605	13.2185	NA	17.5259	4.22825	48	NA	42	6	9.34398	NA	11.7647	4.75436
Brd2	76.5343	42.9509	24.8742	8.70919	15.5147	21.6924	10.3772	15.664	50	17	27	6	10.1358	8.58586	11.2641	10.7914
Brd3	39.0552	0.907403	12.5762	25.5716	7.01801	2.02094	5.63451	8.86672	41	1	16	24	7.36748	2.22717	7.16846	8.32178
Brd4	102.831	NA	38.805	64.0259	16.2965	NA	9.20205	35.889	57	NA	26	31	9.03328	NA	6.16552	17.3767
Brd7	6.3859	NA	5.1326	1.2533	2.69447	NA	2.62403	7.08081	8	NA	6	2	3.37553	NA	3.06748	11.2994
Brd8	25.6039	NA	20.7481	4.85579	5.41309	NA	7.26475	3.09878	11	NA	9	2	2.32558	NA	3.15126	1.27632
Brd9	16.7182	NA	2.2506	14.4676	6.94568	NA	1.25452	25.9742	12	NA	5	7	4.98546	NA	2.78707	12.5673
Bre	1.12046	NA	0.883147	0.237311	0.767437	NA	0.92573	2.49801	2	NA	1	1	1.36986	NA	1.04822	10.5263
Brf1	74.5495	NA	52.3838	22.1658	27.0597	NA	25.7921	48.2914	25	NA	19	6	9.07441	NA	9.355	13.0719
Brf2	53.2032	NA	53.2032	NA	38.4694	NA	42.1244	NA	9	NA	9	NA	6.50759	NA	7.12589	NA
Bri3	2.67679	0.767929	1.90886	NA	2.34394	3.80163	3.75759	NA	6	NA	6	NA	5.25394	NA	11.811	NA
Bri3bp	13.6766	NA	3.77368	9.90288	1.95715	NA	4.95234	1.61495	11	NA	5	6	1.57413	NA	6.56168	0.978474
Brinp1	46.6343	NA	33.9576	12.6767	13.9041	NA	14.8741	19.9007	7	NA	5	2	2.08706	NA	2.1901	3.13972
Brip1	20.3271	NA	12.3055	8.02161	2.93194	NA	3.49093	2.43596	4	NA	3	1	0.576951	NA	0.851064	0.303674
Brix1	7.7301	NA	6.0413	1.68879	2.91262	NA	5.68861	1.09095	7	NA	6	1	2.63753	NA	5.64972	0.645995
Brk1	20.7983	NA	3.82316	16.9751	18.9939	NA	16.7682	19.7385	17	NA	5	12	15.5251	NA	21.9298	13.9535
Brms1	17.436	1.63415	NA	15.8018	13.0314	17.3846	NA	31.4151	4	NA	NA	4	2.98954	NA	NA	7.95229
Brms1l	34.9837	NA	NA	34.9837	13.6336	NA	NA	24.0273	7	NA	NA	7	2.72798	NA	NA	4.80769
Brox	6.32027	NA	NA	6.32027	1.82878	NA	NA	3.14441	1	NA	NA	1	0.289352	NA	NA	0.497512
Brpf1	63.354	0.782422	57.1919	5.3796	12.9267	1.76619	15.2025	7.72931	27	1	25	1	5.50908	2.25734	6.6454	1.43678
Brpf3	57.8088	NA	43.0631	14.7457	9.67835	NA	11.9123	7.03515	25	NA	17	8	4.1855	NA	4.70263	3.81679
Brwd1	112.851	NA	84.0984	28.7528	10.0384	NA	11.7227	7.29396	38	NA	26	12	3.38018	NA	3.6242	3.04414
Brwd3	56.4017	NA	52.2726	4.12913	8.76619	NA	9.6801	5.11031	6	NA	5	1	0.932546	NA	0.925926	1.23762
Bscl2	3.91408	3.1154	0.798673	NA	1.71972	3.27592	0.650916	NA	4	1	3	NA	1.75747	1.05152	2.44499	NA
Bsdc1	42.3836	NA	4.35349	38.0301	15.9397	NA	3.39057	27.9839	22	NA	4	18	8.27379	NA	3.11526	13.245
Bspry	8.18509	NA	8.18509	NA	4.69598	NA	5.60239	NA	1	NA	1	NA	0.573723	NA	0.684463	NA
Btaf1	29.3818	NA	12.8686	16.5132	3.45303	NA	2.31992	6.22436	27	NA	14	13	3.17311	NA	2.52389	4.90011
Btbd1	11.9161	NA	9.50848	2.40766	3.97072	NA	6.48158	1.61155	4	NA	2	2	1.33289	NA	1.36333	1.33869
Btbd10	13.0627	NA	6.63545	6.42727	5.09665	NA	4.64667	8.1876	6	NA	3	3	2.34101	NA	2.10084	3.82166
Btbd11	90.3354	2.15002	37.7576	50.4278	15.1697	3.68154	11.0145	25.9536	37	1	14	22	6.21327	1.71233	4.08401	11.3227
Btbd19	4.23902	NA	4.23902	NA	Inf	NA	Inf	NA	4	NA	4	NA	Inf	NA	Inf	NA
Btbd2	13.4576	NA	1.97228	11.4853	4.44731	NA	1.25463	12.5797	11	NA	2	9	3.63516	NA	1.27226	9.85761
Btbd3	50.9606	3.03791	41.6167	6.30597	9.97077	4.13321	28.8204	2.15074	18	3	11	4	3.52182	4.08163	7.61773	1.36426
Btbd7	135.166	2.12657	117.222	15.8171	31.3902	4.72571	34.5483	34.1623	61	2	51	8	14.1663	4.44444	15.0309	17.2786
Btbd8	0.989066	NA	0.989066	NA	0.872193	NA	0.872193	NA	1	NA	1	NA	0.881834	NA	0.881834	NA
Btbd9	77.1401	NA	5.54314	71.5969	11.2498	NA	3.01421	14.7653	24	NA	5	19	3.50007	NA	2.71887	3.91833
Btd	197.29	NA	134.583	62.7069	101.591	NA	84.6436	220.799	23	NA	20	3	11.8435	NA	12.5786	10.5634
Btf3	4.83987	3.19952	1.64035	NA	4.28687	12.4981	2.66724	NA	3	1	2	NA	2.65722	3.90625	3.25203	NA
Btg1	35.6002	3.0791	14.6911	17.83	7.10866	9.50339	28.4712	4.27782	31	4	14	13	6.1901	12.3457	27.1318	3.119
Btg2	51.2271	1.56523	11.6533	38.0085	16.616	15.3454	24.4304	15.1791	39	3	6	30	12.65	29.4118	12.5786	11.9808
Btrc	33.8411	NA	NA	33.8411	5.35037	NA	NA	7.68766	10	NA	NA	10	1.58103	NA	NA	2.27169
Bub1	3.80062	NA	0.954446	2.84618	0.876326	NA	0.30014	2.72884	2	NA	1	1	0.461148	NA	0.314465	0.958773
Bub1b	7.84867	NA	6.89913	0.949541	2.13919	NA	2.18396	3.47817	9	NA	8	1	2.45298	NA	2.53245	3.663
Bub3	5.71238	NA	1.11541	4.59697	2.77975	NA	1.13701	4.55146	6	NA	3	3	2.91971	NA	3.0581	2.9703
Bud13	9.16779	NA	7.15913	2.00866	4.15208	NA	3.7404	7.30423	3	NA	2	1	1.3587	NA	1.04493	3.63636
Bud31	27.4374	NA	NA	27.4374	38.9182	NA	NA	145.171	7	NA	NA	7	9.92908	NA	NA	37.037
Bysl	36.3586	NA	10.3627	25.9959	9.43399	NA	7.90446	11.6993	10	NA	3	7	2.59471	NA	2.28833	3.15032
Bzrap1	33.1422	NA	33.1422	NA	4.35166	NA	5.98127	NA	3	NA	3	NA	0.393908	NA	0.541419	NA
Bzw1	9.35245	NA	3.17045	6.182	3.30125	NA	2.51623	4.17139	14	NA	6	8	4.94176	NA	4.7619	5.39811
Bzw2	6.96507	3.5124	2.6803	0.772367	3.72265	21.2873	2.12722	1.73176	8	1	3	4	4.27579	6.06061	2.38095	8.96861
C030006K11Rik	8.01116	NA	NA	8.01116	4.39932	NA	NA	5.14195	2	NA	NA	2	1.0983	NA	NA	1.2837
C030034I22Rik	3.2399	NA	3.2399	NA	Inf	NA	Inf	NA	1	NA	1	NA	Inf	NA	Inf	NA
C030046E11Rik	72.8447	NA	49.1058	23.7389	11.5958	NA	11.5029	13.3967	27	NA	21	6	4.29799	NA	4.91918	3.386
C130021I20Rik	63.6174	NA	63.6174	NA	Inf	NA	Inf	NA	15	NA	15	NA	Inf	NA	Inf	NA
C130046K22Rik	18.84	NA	18.84	NA	Inf	NA	Inf	NA	1	NA	1	NA	Inf	NA	Inf	NA
C1d	0.609526	NA	0.609526	NA	0.20613	NA	1.43081	NA	1	NA	1	NA	0.338181	NA	2.34742	NA
C1galt1	84.849	NA	37.332	47.5171	41.0891	NA	34.1868	60.5313	32	NA	16	16	15.4964	NA	14.652	20.3822
C1galt1c1	50.1655	NA	50.1655	NA	33.2883	NA	52.7503	NA	9	NA	9	NA	5.97213	NA	9.46372	NA
C1qbp	10.3187	NA	2.81412	7.50459	8.85727	NA	3.35015	30.1389	8	NA	4	4	6.86695	NA	4.7619	16.0643
C1qtnf1	40.7429	NA	1.94089	38.802	9.01592	NA	2.29419	11.3093	17	NA	1	16	3.76189	NA	1.18203	4.66336
C1qtnf4	2.29503	NA	NA	2.29503	1.68134	NA	NA	14.2549	1	NA	NA	1	0.732601	NA	NA	6.21118
C1qtnf6	8.86097	NA	NA	8.86097	3.64949	NA	NA	4.83942	1	NA	NA	1	0.411862	NA	NA	0.54615
C1s1	38.0009	NA	29.6841	8.31677	12.7306	NA	14.237	13.8613	7	NA	7	NA	2.34506	NA	3.35731	NA
C2	4.27129	NA	4.27129	NA	1.61547	NA	1.87091	NA	1	NA	1	NA	0.378215	NA	0.43802	NA
C230052I12Rik	4.87536	NA	NA	4.87536	2.72671	NA	NA	7.24421	1	NA	NA	1	0.559284	NA	NA	1.48588
C2cd2	21.0356	NA	NA	21.0356	3.20861	NA	NA	5.0725	3	NA	NA	3	0.457596	NA	NA	0.723415
C2cd2l	8.46412	NA	5.52488	2.93925	1.95296	NA	2.60485	1.61586	3	NA	1	2	0.692201	NA	0.471476	1.09951
C2cd3	58.5703	NA	37.8353	20.735	7.49747	NA	5.42675	32.8605	22	NA	17	5	2.81618	NA	2.43832	7.92393
C2cd4d	4.79115	NA	NA	4.79115	3.64069	NA	NA	42.3996	1	NA	NA	1	0.759878	NA	NA	8.84956
C2cd5	9.76792	NA	6.46317	3.30475	2.1644	NA	2.34683	3.03746	8	NA	6	2	1.77266	NA	2.17865	1.83824
C330006A16Rik	25.887	2.16278	12.1477	11.5765	9.64851	3.14814	28.9231	7.34548	16	3	6	7	5.96347	4.36681	14.2857	4.44162
C330007P06Rik	1.40021	NA	NA	1.40021	0.419351	NA	NA	0.547814	1	NA	NA	1	0.299491	NA	NA	0.391236
C330013E15Rik	14.1705	NA	14.1705	NA	Inf	NA	Inf	NA	1	NA	1	NA	Inf	NA	Inf	NA
C330018D20Rik	16.5847	NA	9.3829	7.20177	6.87305	NA	26.9624	3.76859	3	NA	2	1	1.24327	NA	5.74713	0.523286
C330027C09Rik	7.44559	NA	2.32419	5.1214	1.87357	NA	0.853226	4.415	7	NA	4	3	1.76145	NA	1.46843	2.58621
C630043F03Rik	9.66673	NA	9.66673	NA	Inf	NA	Inf	NA	1	NA	1	NA	Inf	NA	Inf	NA
C77080	86.642	NA	60.248	26.394	15.3105	NA	19.5928	14.0618	66	NA	43	23	11.6628	NA	13.9837	12.2536
C78339	9.43089	NA	6.71438	2.71651	6.82903	NA	5.59532	23.2181	4	NA	3	1	2.89645	NA	2.5	8.54701
C87436	45.4715	8.83114	29.838	6.80237	14.5649	9.16093	17.2974	15.7099	8	2	5	1	2.56246	2.07469	2.89855	2.30947
C920006O11Rik	10.7871	NA	10.7871	NA	Inf	NA	Inf	NA	2	NA	2	NA	Inf	NA	Inf	NA
Caap1	3.25232	NA	3.25232	NA	1.54212	NA	3.03672	NA	1	NA	1	NA	0.474158	NA	0.933707	NA
Cab39	34.002	1.158	3.66261	29.1814	8.9479	2.77033	3.56979	12.386	26	2	4	20	6.84211	4.78469	3.89864	8.48896
Cab39l	0.43573	NA	NA	0.43573	0.143474	NA	NA	0.250708	1	NA	NA	1	0.329272	NA	NA	0.575374
Cabin1	30.8999	NA	26.5243	4.37561	4.14208	NA	4.04088	10.082	14	NA	13	1	1.87668	NA	1.9805	2.30415
Cables1	33.1179	NA	6.77039	26.3475	9.90664	NA	3.79293	25.6798	8	NA	2	6	2.39306	NA	1.12045	5.84795
Cables2	85.9643	NA	6.17378	79.7905	29.1899	NA	4.31431	53.0522	13	NA	1	12	4.41426	NA	0.698812	7.97872
Cacfd1	33.0733	NA	1.27957	31.7937	9.52023	NA	2.46071	10.9937	11	NA	2	9	3.16638	NA	3.84615	3.11203
Cachd1	58.1767	2.14572	12.6574	43.3736	11.7174	4.76828	3.27318	66.9346	46	1	23	22	9.26485	2.22222	5.94776	33.9506
Cacna1a	16.794	NA	NA	16.794	2.11804	NA	NA	21.4757	3	NA	NA	3	0.378358	NA	NA	3.83632
Cacna1c	1.2327	NA	1.2327	NA	0.0834369	NA	0.175348	NA	1	NA	1	NA	0.0676865	NA	0.142248	NA
Cacna1d	0.933703	NA	0.933703	NA	0.100919	NA	0.142159	NA	1	NA	1	NA	0.108085	NA	0.152253	NA
Cacnb3	23.2978	NA	10.085	13.2128	7.7273	NA	6.73683	13.692	18	NA	11	7	5.97015	NA	7.34803	7.25389
Cacng4	15.4087	NA	15.4087	NA	15.6593	NA	15.6593	NA	1	NA	1	NA	1.01626	NA	1.01626	NA
Cactin	53.335	NA	29.2599	24.075	19.5796	NA	12.6175	81.0608	18	NA	12	6	6.60793	NA	5.17464	20.202
Cacul1	47.3511	NA	3.76707	43.584	8.17808	NA	3.32193	10.017	22	NA	4	18	3.79965	NA	3.52734	4.13698
Cacybp	8.32233	NA	1.03697	7.28536	3.93491	NA	1.50286	6.07113	5	NA	1	4	2.36407	NA	1.44928	3.33333
Cadm1	5.61528	NA	1.33284	4.28244	1.27998	NA	0.972169	1.42986	7	NA	2	5	1.59562	NA	1.45879	1.66945
Calcoco1	10.8571	1.21301	5.05961	4.58451	3.84459	7.7757	2.43719	7.74411	10	1	6	3	3.54108	6.41026	2.89017	5.06757
Calcrl	4.17414	NA	4.17414	NA	0.881364	NA	2.99866	NA	1	NA	1	NA	0.211149	NA	0.718391	NA
Cald1	11.0111	NA	1.20112	9.81002	2.72891	NA	0.753996	4.37752	6	NA	1	5	1.48699	NA	0.627746	2.23115
Calhm2	10.6827	NA	6.87289	3.80981	5.21362	NA	7.07088	7.25677	2	NA	1	1	0.976086	NA	1.02881	1.90476
Calm1	17.4764	4.36284	1.16643	11.9471	4.36801	25.2187	2.59207	3.53675	20	3	3	14	4.99875	17.341	6.66667	4.14446
Calm2	10.0965	2.14154	4.80948	3.14551	8.30307	15.2967	10.6877	5.02477	10	1	6	3	8.22368	7.14286	13.3333	4.79233
Calm3	6.67457	NA	NA	6.67457	3.0229	NA	NA	4.25403	7	NA	NA	7	3.17029	NA	NA	4.46144
Calm4	25.2929	2.44277	11.3297	11.5205	27.6426	17.5739	25.3461	35.0166	19	2	11	6	20.765	14.3885	24.6085	18.2371
Calm5	15.7333	1.36926	6.3168	8.04728	28.6582	14.4133	14.9333	259.59	6	NA	6	NA	10.929	NA	14.1844	NA
Calml3	14.4816	NA	14.4816	NA	10.1554	NA	32.1813	NA	1	NA	1	NA	0.701262	NA	2.22222	NA
Calr	30.6394	5.68651	11.9761	12.9768	15.7691	42.7557	9.57323	23.2143	26	1	17	8	13.3814	7.5188	13.5891	14.3113
Calu	30.5445	6.95368	7.59456	15.9962	8.92331	18.0615	8.7697	7.36475	33	3	10	20	9.64067	7.79221	11.5473	9.2081
Camk1d	100.014	NA	NA	100.014	13.6221	NA	NA	18.014	9	NA	NA	9	1.22582	NA	NA	1.62104
Camk2d	8.45973	NA	1.04645	7.41328	1.89638	NA	0.624747	3.19676	3	NA	1	2	0.672495	NA	0.597015	0.862441
Camk2g	63.2905	NA	0.953899	62.3366	17.0825	NA	0.599937	31.2935	18	NA	1	17	4.8583	NA	0.628931	8.53414
Camk2n1	18.6356	NA	NA	18.6356	5.15794	NA	NA	5.58287	4	NA	NA	4	1.10711	NA	NA	1.19832
Camkk1	32.8351	NA	NA	32.8351	9.51466	NA	NA	18.53	5	NA	NA	5	1.44886	NA	NA	2.82167
Camkk2	11.194	NA	1.90761	9.28636	2.28962	NA	1.14296	3.09236	3	NA	1	2	0.613622	NA	0.599161	0.666001
Caml	21.0081	NA	17.3531	3.65504	15.1465	NA	19.608	8.78615	11	NA	8	3	7.93079	NA	9.03955	7.21154
Camsap1	52.1499	NA	38.6153	13.5346	6.45899	NA	7.97506	4.68649	15	NA	12	3	1.85782	NA	2.47831	1.03878
Camsap2	132.886	8.20429	91.1544	33.5273	16.9866	12.3003	20.5442	12.3307	63	3	42	18	8.05318	4.49775	9.46586	6.62008
Camsap3	52.8786	8.35032	43.6828	0.845523	12.3088	23.0672	11.6116	4.91583	23	1	21	1	5.35382	2.76243	5.58214	5.81395
Camta1	46.4202	NA	2.94045	43.4797	4.47251	NA	0.581347	8.32626	28	NA	5	23	2.69776	NA	0.988533	4.40444
Camta2	39.1432	NA	16.7403	22.403	8.42333	NA	4.61546	30.4388	11	NA	6	5	2.36712	NA	1.65426	6.79348
Cand1	65.1833	0.645403	58.2067	6.33116	7.94047	1.85995	15.7614	1.51863	39	1	35	3	4.75088	2.88184	9.47739	0.719597
Cand2	69.2628	NA	68.347	0.915859	12.7018	NA	18.4323	0.541608	11	NA	10	1	2.01724	NA	2.69687	0.591366
Cant1	68.1153	NA	44.5147	23.6006	20.8113	NA	33.6468	16.4464	25	NA	15	10	7.63825	NA	11.3379	6.96864
Canx	11.8606	NA	4.13672	7.72392	2.76536	NA	2.32923	3.32212	17	NA	7	10	3.96363	NA	3.94144	4.30108
Cap1	15.7446	NA	3.82648	11.9182	6.57946	NA	2.68525	13.1547	21	NA	7	14	8.7756	NA	4.91228	15.4525
Capg	4.09806	NA	3.16583	0.932235	2.13775	NA	3.01508	8.63181	7	NA	5	2	3.65154	NA	4.7619	18.5185
Capn1	15.1276	NA	11.0523	4.0753	4.74072	NA	5.15982	4.99424	24	NA	18	6	7.52115	NA	8.40336	7.35294
Capn12	4.56025	NA	NA	4.56025	1.61254	NA	NA	7.63861	5	NA	NA	5	1.76803	NA	NA	8.37521
Capn15	41.7603	NA	41.7603	NA	12.7008	NA	12.7008	NA	13	NA	13	NA	3.95377	NA	3.95377	NA
Capn2	18.0296	NA	2.59834	15.4312	5.66077	NA	1.23554	16.1923	11	NA	3	8	3.45369	NA	1.42653	8.39454
Capn6	7.20915	NA	2.50608	4.70306	2.02903	NA	1.30119	3.34262	8	NA	4	4	2.25162	NA	2.07684	2.84293
Capn7	29.0799	NA	17.0514	12.0284	8.16621	NA	6.98256	12.5166	12	NA	9	3	3.36984	NA	3.6855	3.12175
Capns1	14.8048	1.93011	7.43829	5.43639	10.353	33.2778	9.21722	9.62193	17	NA	9	8	11.8881	NA	11.1524	14.1593
Caprin1	28.1915	NA	12.9525	15.239	3.71283	NA	6.04128	2.96883	49	NA	22	27	6.45331	NA	10.2612	5.26008
Caprin2	13.3134	NA	4.5307	8.78266	3.73342	NA	1.46341	27.6184	2	NA	1	1	0.560852	NA	0.322997	3.14465
Capza1	1.4215	NA	NA	1.4215	0.446031	NA	NA	0.646431	1	NA	NA	1	0.313775	NA	NA	0.454752
Capza2	8.68877	NA	5.09828	3.59049	4.37501	NA	5.92134	3.26112	16	NA	11	5	8.05639	NA	12.7758	4.54133
Capzb	10.6837	NA	6.24388	4.43978	5.36059	NA	7.00772	5.36206	20	NA	13	7	10.0351	NA	14.5903	8.45411
Car12	62.7537	3.01795	5.05288	54.6829	16.8874	18.515	4.74449	21.9787	45	2	7	36	12.1098	12.2699	6.57277	14.4695
Car13	16.1467	NA	1.30134	14.8454	7.02335	NA	1.64935	10.3959	14	NA	2	12	6.0896	NA	2.53485	8.40336
Car15	4.4224	NA	4.4224	NA	4.00217	NA	4.53579	NA	2	NA	2	NA	1.80995	NA	2.05128	NA
Card10	37.6181	NA	12.6688	24.9493	7.95645	NA	3.94297	17.1238	34	NA	16	18	7.1912	NA	4.97977	12.3542
Card14	46.0412	NA	NA	46.0412	11.6325	NA	NA	72.6203	7	NA	NA	7	1.76857	NA	NA	11.041
Carf	14.5321	NA	14.5321	NA	2.51029	NA	7.99345	NA	2	NA	2	NA	0.345483	NA	1.10011	NA
Carhsp1	8.83168	NA	NA	8.83168	3.09992	NA	NA	3.75178	8	NA	NA	8	2.808	NA	NA	3.39847
Carkd	5.56329	NA	1.32058	4.24271	3.91781	NA	1.20271	17.6046	4	NA	1	3	2.8169	NA	0.910747	12.4481
Carm1	42.8838	NA	10.7858	32.098	13.3262	NA	5.90357	25.1355	30	NA	11	19	9.32256	NA	6.0208	14.8786
Cars	11.8624	NA	5.4841	6.37831	3.68169	NA	2.19716	9.93507	10	NA	7	3	3.10366	NA	2.80449	4.6729
Cars2	0.657761	NA	0.657761	NA	0.355546	NA	0.39648	NA	1	NA	1	NA	0.540541	NA	0.602773	NA
Casc3	30.5484	NA	22.7209	7.82753	8.16366	NA	10.835	4.92607	24	NA	15	9	6.41368	NA	7.15308	5.66394
Casc4	0.759703	NA	NA	0.759703	0.174484	NA	NA	0.28571	1	NA	NA	1	0.229674	NA	NA	0.376081
Casc5	105.156	8.09332	93.7857	3.2773	16.1159	66.8869	14.7462	74.4841	26	1	25	NA	3.98467	8.26446	3.93082	NA
Casd1	40.267	NA	7.03354	33.2334	10.7093	NA	2.93799	26.3131	10	NA	2	8	2.65957	NA	0.835422	6.33413
Cask	13.5924	NA	6.46027	7.13216	1.62569	NA	2.323	1.40121	17	NA	9	8	2.03325	NA	3.23625	1.57171
Caskin1	1.82701	NA	NA	1.82701	0.29592	NA	NA	1.08043	1	NA	NA	1	0.16197	NA	NA	0.591366
Caskin2	105.806	16.6331	66.7687	22.4043	22.4071	34.5803	18.516	35.2824	50	9	30	11	10.5887	18.711	8.31947	17.3228
Casp14	23.3959	NA	NA	23.3959	10.0369	NA	NA	17.4336	4	NA	NA	4	1.716	NA	NA	2.98063
Casp2	9.93009	NA	2.39636	7.53373	2.86748	NA	1.76332	3.73142	7	NA	2	5	2.02137	NA	1.47167	2.47647
Casp3	13.3747	NA	2.18077	11.1939	5.1244	NA	2.61483	7.22188	8	NA	4	4	3.06513	NA	4.79616	2.58065
Casp6	9.22573	NA	4.01066	5.21507	6.34071	NA	4.82631	9.85836	10	NA	6	4	6.87285	NA	7.22022	7.56144
Casp8	16.9806	2.41891	14.5617	NA	5.86954	3.61571	9.87232	NA	8	1	7	NA	2.7653	1.49477	4.74576	NA
Casp8ap2	178.327	NA	178.327	NA	26.2092	NA	30.2814	NA	29	NA	29	NA	4.2622	NA	4.92444	NA
Casp9	19.6277	NA	NA	19.6277	5.03404	NA	NA	8.43115	6	NA	NA	6	1.53886	NA	NA	2.57732
Casr	5.19588	NA	NA	5.19588	1.14598	NA	NA	6.73914	1	NA	NA	1	0.220556	NA	NA	1.29702
Cast	6.04356	NA	4.37711	1.66645	2.08831	NA	1.9325	2.99722	8	NA	7	1	2.76434	NA	3.09051	1.79856
Casz1	144.926	1.73026	99.8602	43.3351	17.0501	4.86027	18.8665	15.2	65	1	51	13	7.64706	2.80899	9.63537	4.5598
Cat	2.94055	NA	NA	2.94055	1.1527	NA	NA	3.45135	1	NA	NA	1	0.392003	NA	NA	1.17371
Catsper2	14.8035	NA	14.8035	NA	6.58814	NA	8.37779	NA	1	NA	1	NA	0.445038	NA	0.565931	NA
Cav1	61.5716	10.1241	6.07356	45.374	22.2521	24.1625	12.8134	24.2124	78	10	15	53	28.1894	23.8663	31.6456	28.2818
Cav2	21.2865	NA	4.01712	17.2693	6.35417	NA	8.14832	6.44138	30	NA	7	23	8.95522	NA	14.1988	8.57889
Cbfa2t2	49.6481	1.04926	5.02134	43.5775	8.16581	1.36979	4.41243	10.4352	25	1	4	20	4.11184	1.30548	3.51494	4.78927
Cbfb	11.1969	NA	1.62984	9.56702	3.84376	NA	2.96875	4.63968	17	NA	2	15	5.83591	NA	3.64299	7.27449
Cbl	12.2803	NA	6.22526	6.055	2.41595	NA	2.27033	2.77371	12	NA	8	4	2.36081	NA	2.91758	1.83234
Cblb	59.3119	NA	22.0227	37.2892	9.38183	NA	7.81778	11.1178	31	NA	10	21	4.90351	NA	3.54988	6.26118
Cblc	0.258561	NA	0.258561	NA	0.155572	NA	0.173415	NA	1	NA	1	NA	0.601685	NA	0.670691	NA
Cbll1	61.6721	NA	43.2418	18.4303	15.3911	NA	29.2966	7.52256	18	NA	13	5	4.49214	NA	8.80759	2.04082
Cbr1	7.95376	NA	4.45281	3.50095	7.35778	NA	5.3391	29.6691	6	NA	4	2	5.55042	NA	4.79616	16.9492
Cbr2	4.55485	NA	1.64204	2.91282	4.46117	NA	2.23406	12.2904	5	NA	2	3	4.89716	NA	2.72109	12.6582
Cbr3	15.4148	NA	9.40657	6.00824	13.2089	NA	11.2789	26.468	7	NA	5	2	5.99829	NA	5.9952	8.81057
Cbr4	24.798	NA	3.38573	21.4122	22.2403	NA	4.76192	74.0908	7	NA	2	5	6.27803	NA	2.81294	17.301
Cbs	11.0605	NA	3.30679	7.75375	4.41891	NA	1.96132	13.675	11	NA	6	5	4.39473	NA	3.55872	8.81834
Cbx1	2.45937	2.45937	NA	NA	1.93043	9.6446	NA	NA	4	3	1	NA	3.13972	11.7647	1.79211	NA
Cbx2	65.2007	NA	33.5942	31.6065	17.4333	NA	21.5348	15.0507	25	NA	14	11	6.68449	NA	8.97436	5.2381
Cbx4	87.1454	NA	62.848	24.2974	16.7684	NA	37.9517	7.31629	32	NA	19	13	6.1574	NA	11.4734	3.91448
Cbx5	15.9993	NA	1.40629	14.593	1.78047	NA	2.44147	1.80272	21	NA	2	19	2.33697	NA	3.47222	2.34713
Cbx7	64.6102	NA	NA	64.6102	22.3333	NA	NA	28.2634	11	NA	NA	11	3.80228	NA	NA	4.8119
Cbx8	18.3667	NA	18.3667	NA	13.185	NA	16.8656	NA	6	NA	6	NA	4.30725	NA	5.50964	NA
Cc2d1a	18.4727	NA	1.64238	16.8303	5.61822	NA	0.579937	41.1499	9	NA	2	7	2.73723	NA	0.706215	17.1149
Cc2d1b	19.0895	NA	2.0555	17.034	5.80934	NA	0.807028	28.202	11	NA	2	9	3.34753	NA	0.785238	14.9007
Ccar1	29.4852	NA	27.2916	2.19357	6.58446	NA	7.93131	2.62702	21	NA	19	2	4.68959	NA	5.52165	2.39521
Ccar2	8.13901	NA	5.12162	3.01738	2.19736	NA	1.84963	4.11088	11	NA	7	4	2.96976	NA	2.52799	5.44959
Ccbl1	6.52321	NA	NA	6.52321	3.39044	NA	NA	17.4885	1	NA	NA	1	0.519751	NA	NA	2.68097
Ccbl2	1.94159	NA	NA	1.94159	0.864465	NA	NA	2.49883	1	NA	NA	1	0.445236	NA	NA	1.287
Ccdc101	0.816715	NA	0.816715	NA	0.700442	NA	0.925981	NA	1	NA	1	NA	0.857633	NA	1.13379	NA
Ccdc104	6.98657	NA	1.73161	5.25495	4.58737	NA	1.67792	15.1004	2	NA	1	1	1.3132	NA	0.968992	2.87356
Ccdc106	4.43262	NA	4.43262	NA	2.11783	NA	4.94712	NA	2	NA	2	NA	0.955566	NA	2.23214	NA
Ccdc112	22.3031	NA	20.3794	1.92371	7.96254	NA	12.9147	1.74091	7	NA	6	1	2.49911	NA	3.80228	0.904977
Ccdc117	10.8735	NA	1.31058	9.56292	3.19715	NA	1.57144	3.97131	3	NA	1	2	0.882094	NA	1.19904	0.830565
Ccdc120	22.1127	1.75068	13.1062	7.25588	6.07326	5.66563	6.93449	5.03181	10	1	4	5	2.7465	3.23625	2.1164	3.46741
Ccdc122	2.24878	NA	2.24878	NA	1.30667	NA	2.57592	NA	2	NA	2	NA	1.16212	NA	2.29095	NA
Ccdc124	4.27308	NA	1.53698	2.73611	4.69054	NA	2.35012	12.7855	4	NA	3	1	4.39078	NA	4.58716	4.6729
Ccdc125	16.1676	NA	NA	16.1676	5.97692	NA	NA	14.4096	1	NA	NA	1	0.369686	NA	NA	0.891266
Ccdc126	21.8528	1.62191	9.82136	10.4096	9.62256	5.85527	23.2183	6.62608	5	1	2	2	2.20167	3.61011	4.72813	1.27307
Ccdc127	71.4062	NA	30.946	40.4602	8.28858	NA	39.0732	5.24028	16	NA	8	8	1.85723	NA	10.101	1.03614
Ccdc132	8.28885	NA	0.854158	7.43469	1.414	NA	0.301609	2.56369	4	NA	1	3	0.682361	NA	0.353107	1.03448
Ccdc134	10.5989	NA	NA	10.5989	5.18284	NA	NA	8.75219	1	NA	NA	1	0.488998	NA	NA	0.825764
Ccdc136	7.52505	NA	5.60423	1.92083	2.15556	NA	1.86249	7.30353	3	NA	2	1	0.859353	NA	0.664673	3.80228
Ccdc14	153.879	NA	117.544	36.3354	37.4676	NA	41.9052	28.8376	18	NA	14	4	4.38276	NA	4.99109	3.1746
Ccdc142	19.935	NA	19.935	NA	6.37104	NA	8.99187	NA	3	NA	3	NA	0.958773	NA	1.35318	NA
Ccdc157	2.03357	NA	NA	2.03357	0.394715	NA	NA	0.792816	1	NA	NA	1	0.194099	NA	NA	0.389864
Ccdc163	0.655244	NA	NA	0.655244	0.53974	NA	NA	4.48797	1	NA	NA	1	0.823723	NA	NA	6.84932
Ccdc166	34.9389	NA	NA	34.9389	14.4734	NA	NA	20.2897	5	NA	NA	5	2.07125	NA	NA	2.9036
Ccdc167	4.16801	NA	1.00276	3.16525	0.738224	NA	3.14346	0.598912	2	NA	2	NA	0.354233	NA	6.26959	NA
Ccdc174	4.61857	NA	4.61857	NA	2.62867	NA	3.28958	NA	1	NA	1	NA	0.569152	NA	0.712251	NA
Ccdc176	68.0388	NA	41.3135	26.7253	31.0679	NA	25.7887	56.3824	17	NA	6	11	7.76256	NA	3.74532	23.2068
Ccdc18	17.4709	NA	17.4709	NA	3.75154	NA	3.99975	NA	3	NA	3	NA	0.644192	NA	0.686813	NA
Ccdc181	32.0544	NA	32.0544	NA	16.9063	NA	20.9506	NA	3	NA	3	NA	1.58228	NA	1.96078	NA
Ccdc19	15.7536	NA	15.7536	NA	8.64633	NA	9.51305	NA	3	NA	3	NA	1.64654	NA	1.81159	NA
Ccdc23	18.9749	NA	1.98958	16.9853	19.3621	NA	7.28782	53.9217	10	NA	2	8	10.2041	NA	7.32601	25.3968
Ccdc25	45.8387	NA	NA	45.8387	20.5832	NA	NA	31.7223	10	NA	NA	10	4.49035	NA	NA	6.92042
Ccdc28b	2.96228	2.1071	0.855178	NA	3.52653	17.7068	1.41821	NA	2	1	1	NA	2.38095	8.40336	1.65837	NA
Ccdc3	24.1098	NA	6.30895	17.8008	9.07065	NA	7.67513	10.6084	20	NA	4	16	7.52445	NA	4.86618	9.53516
Ccdc32	17.8776	NA	NA	17.8776	9.5602	NA	NA	14.3365	4	NA	1	3	2.13904	NA	1.85185	2.40577
Ccdc34	6.90641	NA	NA	6.90641	3.32199	NA	NA	7.47447	3	NA	1	2	1.443	NA	0.905797	2.1645
Ccdc38	1.4416	NA	NA	1.4416	0.394418	NA	NA	0.814002	1	NA	NA	1	0.273598	NA	NA	0.564653
Ccdc43	11.0166	NA	NA	11.0166	4.77527	NA	NA	6.79614	1	NA	NA	1	0.433463	NA	NA	0.616903
Ccdc47	7.75591	0.911627	3.53579	3.30849	2.37329	3.86282	2.43511	2.09398	9	1	5	3	2.75398	4.23729	3.44353	1.89873
Ccdc50	34.4248	NA	NA	34.4248	4.88434	NA	NA	5.78471	14	NA	NA	14	1.98638	NA	NA	2.35255
Ccdc51	14.5347	NA	5.35934	9.17539	6.06372	NA	4.3893	8.3717	4	NA	3	1	1.66875	NA	2.457	0.912409
Ccdc53	0.870766	NA	NA	0.870766	0.631447	NA	NA	1.60067	1	NA	1	NA	0.725163	NA	1.44928	NA
Ccdc55	54.3957	NA	30.0008	24.3948	17.4569	NA	18.4167	16.8473	12	NA	8	4	3.85109	NA	4.91099	2.76243
Ccdc58	1.74897	NA	1.74897	NA	1.42773	NA	3.83546	NA	1	NA	1	NA	0.816327	NA	2.19298	NA
Ccdc59	33.3559	2.46194	11.3135	19.5805	30.9424	107.041	15.648	58.9773	11	1	3	7	10.2041	43.4783	4.14938	21.0843
Ccdc6	45.3724	NA	3.06213	42.3102	8.23306	NA	2.17172	10.7879	27	NA	2	25	4.89929	NA	1.41844	6.3743
Ccdc61	1.64635	NA	1.64635	NA	0.819077	NA	1.07184	NA	1	NA	1	NA	0.497512	NA	0.651042	NA
Ccdc66	67.9293	NA	67.9293	NA	23.0503	NA	24.1914	NA	6	NA	6	NA	2.03597	NA	2.13675	NA
Ccdc71	59.5389	NA	39.7707	19.7682	19.1566	NA	30.5458	11.9518	26	NA	16	10	8.36551	NA	12.2888	6.04595
Ccdc71l	45.6741	NA	NA	45.6741	10.9926	NA	NA	13.8281	10	NA	NA	10	2.40674	NA	NA	3.02755
Ccdc77	4.35201	2.39901	NA	1.953	1.64165	15.0881	NA	1.91096	2	1	NA	1	0.754432	6.28931	NA	0.978474
Ccdc78	3.39829	NA	NA	3.39829	2.05832	NA	NA	11.29	NA	NA	NA	NA	NA	NA	NA	NA
Ccdc8	23.1246	NA	23.1246	NA	11.2365	NA	11.2365	NA	12	NA	12	NA	5.8309	NA	5.8309	NA
Ccdc80	63.3028	14.6586	44.7066	3.93753	17.3527	38.1735	15.6865	9.51093	24	6	17	1	6.57895	15.625	5.96491	2.41546
Ccdc82	14.0629	NA	14.0629	NA	3.02949	NA	9.03205	NA	3	NA	3	NA	0.646273	NA	1.92678	NA
Ccdc85b	49.7679	NA	15.6535	34.1143	11.3083	NA	37.902	8.92578	10	NA	4	6	2.27221	NA	9.68523	1.56986
Ccdc85c	5.67278	NA	5.67278	NA	3.66695	NA	4.49151	NA	3	NA	3	NA	1.93924	NA	2.3753	NA
Ccdc86	28.3341	NA	8.01716	20.317	9.43527	NA	6.25851	12.029	12	NA	6	6	3.996	NA	4.68384	3.5524
Ccdc88c	85.7428	NA	82.3296	3.41323	13.6273	NA	13.6533	31.0294	19	NA	19	NA	3.01971	NA	3.15091	NA
Ccdc9	8.1582	0.468141	7.69006	NA	3.1744	1.83585	4.13667	NA	4	1	3	NA	1.55642	3.92157	1.61377	NA
Ccdc90b	3.01738	NA	NA	3.01738	1.89059	NA	NA	6.88899	1	NA	NA	1	0.626566	NA	NA	2.28311
Ccdc91	10.2849	NA	NA	10.2849	4.18256	NA	NA	11.0948	4	NA	NA	4	1.62668	NA	NA	4.31499
Ccdc92	6.43838	NA	NA	6.43838	2.85389	NA	NA	5.92308	1	NA	1	NA	0.443262	NA	1.0582	NA
Ccdc93	45.8419	NA	NA	45.8419	6.31779	NA	NA	8.78703	5	NA	NA	5	0.689085	NA	NA	0.958405
Ccdc97	43.377	0.787953	4.4931	38.096	14.5268	9.05694	4.39208	20.307	24	1	2	21	8.03751	11.4943	1.95503	11.194
Cchcr1	1.01395	NA	1.01395	NA	0.381329	NA	0.438372	NA	1	NA	1	NA	0.376081	NA	0.432339	NA
Ccl28	11.064	NA	NA	11.064	2.95909	NA	NA	3.36089	1	NA	NA	1	0.267451	NA	NA	0.303767
Ccm2	58.0675	NA	6.61837	51.4492	27.5986	NA	4.81686	128.623	6	NA	2	4	2.85171	NA	1.4556	10
Ccna2	8.43277	NA	7.13878	1.29398	2.99992	NA	5.62552	0.945204	13	NA	10	3	4.62469	NA	7.88022	2.19138
Ccnb1	2.60131	NA	0.555528	2.04579	1.12319	NA	0.429642	2.17869	2	NA	1	1	0.863558	NA	0.773395	1.06496
Ccnb2	7.14529	NA	5.92322	1.22207	4.63679	NA	4.94839	5.31333	10	NA	8	2	6.48929	NA	6.68338	8.69565
Ccnd1	23.3358	1.69272	4.07901	17.5641	6.14748	7.2962	4.59348	6.56357	25	1	6	18	6.58588	4.31034	6.75676	6.72646
Ccnd2	66.822	3.62786	4.05959	59.1346	11.5789	13.1922	4.6662	12.7831	102	2	10	90	17.6746	7.27273	11.4943	19.4553
Ccnd3	2.31859	NA	0.383498	1.9351	1.02593	NA	0.436288	2.12182	4	NA	1	3	1.76991	NA	1.13766	3.28947
Ccndbp1	2.51989	NA	0.867352	1.65254	1.60298	NA	0.809853	4.1417	2	NA	1	1	1.27226	NA	0.933707	2.50627
Ccne1	1.18528	NA	1.18528	NA	0.605971	NA	0.965997	NA	1	NA	1	NA	0.511247	NA	0.814996	NA
Ccne2	8.94224	NA	6.52493	2.41731	2.77709	NA	5.37031	1.43802	2	NA	1	1	0.621118	NA	0.823045	0.594884
Ccnf	23.1082	NA	7.22942	15.8788	7.45666	NA	3.09744	23.842	10	NA	5	5	3.22685	NA	2.14225	7.50751
Ccng1	17.8214	NA	8.06421	9.75723	5.11082	NA	9.1121	4.21297	11	NA	4	7	3.15457	NA	4.51977	3.02245
Ccng2	11.578	NA	6.26596	5.31208	4.64236	NA	6.05407	4.30477	11	NA	6	5	4.41059	NA	5.7971	4.05186
Ccnh	3.73743	NA	NA	3.73743	1.89141	NA	NA	3.95495	2	NA	NA	2	1.01215	NA	NA	2.1164
Ccni	9.85392	0.528952	4.96683	4.35813	3.51424	0.844971	4.37992	4.17446	11	1	6	4	3.92297	1.59744	5.29101	3.83142
Ccnj	61.0403	NA	31.1288	29.9115	15.9917	NA	27.3059	12.1001	12	NA	4	8	3.14383	NA	3.50877	3.23625
Ccnjl	8.55863	NA	NA	8.55863	3.15933	NA	NA	6.6656	1	NA	NA	1	0.36914	NA	NA	0.778816
Ccnk	4.22626	NA	1.95359	2.27268	1.60572	NA	1.11697	3.45391	4	NA	2	2	1.51976	NA	1.14351	3.03951
Ccnl1	23.6661	NA	10.9358	12.7303	11.0332	NA	6.83915	28.3526	30	NA	21	9	13.986	NA	13.1332	20.0445
Ccnl2	24.6186	NA	13.2815	11.3371	10.0813	NA	8.5302	13.4009	27	NA	15	12	11.0565	NA	9.63391	14.1844
Ccnt1	77.7365	NA	77.7365	NA	35.7409	NA	35.7409	NA	25	NA	25	NA	11.4943	NA	11.4943	NA
Ccnt2	105.307	NA	67.8997	37.4077	29.968	NA	31.2614	29.2705	42	NA	34	8	11.9522	NA	15.6538	6.25978
Ccny	23.1749	NA	3.65985	19.5151	5.76922	NA	3.5671	7.76875	16	NA	4	12	3.98307	NA	3.89864	4.77707
Ccnyl1	3.931	NA	NA	3.931	1.34393	NA	NA	1.96256	2	NA	NA	2	0.683761	NA	NA	0.998502
Ccp110	24.6208	NA	17.3731	7.24774	4.9163	NA	5.76222	4.2684	8	NA	5	3	1.59744	NA	1.65837	1.76678
Ccpg1	68.7715	NA	27.5535	41.218	17.0946	NA	13.7424	26.5409	10	NA	6	4	2.48571	NA	2.99252	2.57566
Ccr4	3.30162	NA	NA	3.30162	1.18465	NA	NA	2.06739	1	NA	NA	1	0.358809	NA	NA	0.626174
Ccrn4l	58.1877	NA	27.4376	30.7501	18.9598	NA	21.2695	27.4065	13	NA	8	5	4.23591	NA	6.20155	4.45633
Ccs	1.70755	NA	1.70755	NA	1.61547	NA	2.06976	NA	1	NA	1	NA	0.946074	NA	1.21212	NA
Ccsap	48.0197	NA	2.37789	45.6418	17.9647	NA	3.13292	30.4685	5	NA	1	4	1.87056	NA	1.31752	2.67023
Ccser2	98.4565	NA	47.4049	51.0516	13.0579	NA	19.3174	10.7886	37	NA	21	16	4.90716	NA	8.55746	3.38123
Cct2	13.1084	1.85859	9.23557	2.01421	6.68113	17.5339	5.74351	8.12182	26	2	21	3	13.2518	18.8679	13.0597	12.0968
Cct3	5.60237	NA	3.62534	1.97703	2.86273	NA	2.21327	9.06896	10	NA	5	5	5.10986	NA	3.0525	22.9358
Cct4	3.45375	NA	3.45375	NA	1.75674	NA	2.13194	NA	11	NA	11	NA	5.59512	NA	6.79012	NA
Cct5	9.35502	NA	8.25993	1.09509	5.28831	NA	5.07991	24.8884	23	NA	21	2	13.0017	NA	12.9151	45.4545
Cct6a	11.7626	NA	5.55025	6.21234	5.41805	NA	3.78857	9.97165	24	NA	12	12	11.0548	NA	8.19113	19.2616
Cct7	7.42185	1.36895	4.97099	1.08192	3.02686	2.21871	3.04036	5.40959	10	1	8	1	4.0783	1.62075	4.89297	5
Cct8	7.5131	1.25152	4.77151	1.49006	3.14224	15.4508	2.89709	2.24745	11	1	8	2	4.60059	12.3457	4.85732	3.01659
Ccz1	0.950206	NA	NA	0.950206	0.537143	NA	NA	3.33406	2	NA	NA	2	1.13058	NA	NA	7.01754
Cd109	37.1653	NA	23.4325	13.7329	6.33464	NA	5.4129	11.425	58	NA	44	14	9.8858	NA	10.164	11.6473
Cd151	8.72548	NA	3.59828	5.1272	4.33672	NA	4.72216	6.53979	13	NA	4	9	6.46123	NA	5.24934	11.4796
Cd164	37.2609	1.30959	4.68361	31.2677	13.1664	37.4168	7.88487	14.2061	40	1	9	30	14.1343	28.5714	15.1515	13.6302
Cd1d1	5.75004	NA	NA	5.75004	3.11993	NA	NA	7.72854	3	NA	NA	3	1.62778	NA	NA	4.03226
Cd200	15.701	NA	4.71653	10.9845	6.68984	NA	5.63504	8.29647	6	NA	2	4	2.55646	NA	2.38949	3.02115
Cd247	5.58064	NA	NA	5.58064	1.21213	NA	NA	1.49937	4	NA	NA	4	0.86881	NA	NA	1.07469
Cd248	11.1685	NA	11.1685	NA	4.35927	NA	4.86008	NA	1	NA	1	NA	0.39032	NA	0.435161	NA
Cd24a	26.4235	2.94992	3.17348	20.3001	14.5504	34.705	13.738	13.5334	30	2	3	25	16.5198	23.5294	12.987	16.6667
Cd276	83.8027	NA	1.22331	82.5793	26.3117	NA	1.28634	40.4999	17	NA	1	16	5.33752	NA	1.05152	7.84698
Cd2ap	31.8513	NA	4.42278	27.4285	5.89949	NA	2.31075	8.12216	21	NA	6	15	3.88961	NA	3.1348	4.44181
Cd2bp2	26.0438	2.43947	9.24125	14.3631	7.42201	7.62334	8.98081	6.6496	11	1	3	7	3.1348	3.125	2.91545	3.24074
Cd320	16.9105	NA	NA	16.9105	7.65528	NA	NA	12.5635	4	NA	NA	4	1.81077	NA	NA	2.97177
Cd3eap	32.5987	NA	14.8338	17.7649	14.5141	NA	12.3615	18.2767	11	NA	6	5	4.8976	NA	5	5.14403
Cd44	62.5448	3.27156	24.9296	34.3437	11.064	10.2557	10.64	11.4823	67	1	34	32	11.8521	3.1348	14.5113	10.6988
Cd47	2.04156	NA	2.04156	NA	1.06665	NA	2.09391	NA	1	NA	1	NA	0.522466	NA	1.02564	NA
Cd5	24.2447	NA	10.2404	14.0043	11.7181	NA	6.89588	30.7112	4	NA	1	3	1.9333	NA	0.673401	6.57895
Cd55	8.7368	NA	5.09792	3.63889	3.45875	NA	4.34605	2.83845	5	NA	2	3	1.97941	NA	1.70503	2.34009
Cd59a	2.63421	NA	2.63421	NA	1.41093	NA	7.08122	NA	2	NA	2	NA	1.07124	NA	5.37634	NA
Cd63	1.83444	NA	1.83444	NA	1.51481	NA	2.55849	NA	2	NA	2	NA	1.65153	NA	2.7894	NA
Cd68	7.61817	NA	7.61817	NA	5.97973	NA	7.55771	NA	3	NA	3	NA	2.35479	NA	2.97619	NA
Cd81	5.00754	NA	1.5344	3.47314	3.29878	NA	2.15809	6.24665	7	NA	3	4	4.61133	NA	4.21941	7.19424
Cd82	5.18496	1.11666	NA	4.0683	2.49637	2.17673	NA	5.33198	5	1	1	3	2.40732	1.94932	1.24844	3.93185
Cd9	7.24261	NA	2.11169	5.13092	6.07602	NA	3.10086	12.9897	13	NA	7	6	10.906	NA	10.279	15.1899
Cd97	6.79984	NA	1.52902	5.27082	2.09033	NA	0.622312	8.47399	4	NA	2	2	1.22963	NA	0.814001	3.21543
Cd99l2	33.7043	NA	1.25841	32.4459	9.3623	NA	1.76248	12.3603	15	NA	1	14	4.16667	NA	1.40056	5.33333
Cdadc1	37.4405	NA	18.3001	19.1405	9.0721	NA	11.2894	8.03209	10	NA	5	5	2.42307	NA	3.08452	2.0982
Cdan1	35.6914	NA	3.55094	32.1404	5.59075	NA	0.954553	12.1376	7	NA	2	5	1.09649	NA	0.537634	1.88822
Cdc123	2.83431	NA	1.1317	1.70261	1.74634	NA	1.11938	3.04038	2	NA	1	1	1.23229	NA	0.98912	1.78571
Cdc14a	56.8759	NA	NA	56.8759	12.6813	NA	NA	26.7525	2	NA	NA	2	0.445931	NA	NA	0.940734
Cdc14b	12.3906	NA	NA	12.3906	2.06752	NA	NA	2.97637	2	NA	NA	2	0.333723	NA	NA	0.480423
Cdc16	15.7728	NA	12.3771	3.39568	7.06982	NA	6.64363	13.5286	15	NA	10	5	6.72344	NA	5.36769	19.9203
Cdc20	2.20823	NA	2.20823	NA	1.23779	NA	1.47215	NA	3	NA	3	NA	1.68161	NA	2	NA
Cdc20b	6.08309	NA	NA	6.08309	3.89942	NA	NA	Inf	4	NA	NA	4	2.5641	NA	NA	Inf
Cdc23	18.5052	NA	3.33374	15.1714	4.47633	NA	1.85827	6.56487	13	NA	5	8	3.14465	NA	2.78707	3.4617
Cdc25a	32.7061	NA	5.57648	27.1296	9.01739	NA	3.60937	16.2356	18	NA	6	12	4.96278	NA	3.8835	7.18133
Cdc25c	8.88485	1.72269	NA	7.16215	4.57746	4.88015	NA	29.3531	6	2	NA	4	3.09119	5.66572	NA	16.3934
Cdc27	100.041	0.792769	6.96198	92.2867	17.2515	1.47355	3.18044	30.0412	28	1	6	21	4.82842	1.85874	2.74098	6.83594
Cdc34	17.2591	NA	NA	17.2591	13.6327	NA	NA	50.9117	3	NA	NA	3	2.36967	NA	NA	8.84956
Cdc37	4.20636	NA	1.80459	2.40176	1.71269	NA	1.58298	1.89563	7	NA	4	3	2.85016	NA	3.50877	2.3678
Cdc37l1	10.1399	NA	3.70378	6.43608	4.02855	NA	3.67438	4.39323	6	NA	3	3	2.38379	NA	2.97619	2.04778
Cdc40	4.50889	NA	2.59961	1.90929	1.33994	NA	1.49403	1.22626	5	NA	3	2	1.48588	NA	1.72414	1.28452
Cdc42	13.1407	3.70693	2.71935	6.7144	4.37439	22.6032	4.0831	3.0885	18	2	4	12	5.99201	12.1951	6.00601	5.51978
Cdc42bpa	37.4797	NA	25.1678	12.3119	4.32991	NA	4.84089	3.58322	10	NA	7	3	1.15527	NA	1.34641	0.873108
Cdc42bpb	61.5591	NA	21.9723	39.5868	9.1633	NA	4.27311	35.0636	30	NA	16	14	4.46561	NA	3.11163	12.4004
Cdc42bpg	25.7011	7.96766	12.3149	5.4186	4.28781	30.7632	2.64495	5.02188	19	1	12	6	3.16984	3.861	2.57732	5.5607
Cdc42ep1	37.8442	6.55107	25.8294	5.46372	14.8876	19.2113	20.9995	5.6269	23	3	15	5	9.04799	8.79765	12.1951	5.14933
Cdc42ep2	12.784	NA	NA	12.784	8.5741	NA	NA	26.9136	1	NA	NA	1	0.670691	NA	NA	2.10526
Cdc42ep3	31.9632	13.0994	14.3544	4.50942	16.2497	26.0943	18.7639	6.44203	9	3	4	2	4.5755	5.9761	5.22876	2.85714
Cdc42ep4	76.9099	1.85034	28.1313	46.9283	22.7881	2.7993	26.7917	28.2021	38	1	15	22	11.2593	1.51286	14.2857	13.2212
Cdc42ep5	10.7723	3.75354	7.01876	NA	12.4679	11.1713	15.4939	NA	8	2	6	NA	9.25926	5.95238	13.245	NA
Cdc42se1	24.5754	7.63208	3.23557	13.7078	7.67983	9.9376	13.3151	6.26213	23	6	4	13	7.1875	7.8125	16.4609	5.93878
Cdc42se2	14.2778	5.79949	NA	8.47834	4.54998	10.412	NA	3.64503	13	6	NA	7	4.14277	10.772	NA	3.00946
Cdc45	1.50501	NA	0.92515	0.579865	0.702293	NA	0.543886	4.49508	2	NA	1	1	0.933271	NA	0.587889	7.75194
Cdc5l	10.4602	NA	1.14762	9.31255	3.49488	NA	0.476389	29.8479	4	NA	1	3	1.33645	NA	0.41511	9.61538
Cdc6	6.69918	NA	NA	6.69918	1.42505	NA	NA	2.44764	1	NA	NA	1	0.212721	NA	NA	0.365364
Cdc7	19.6277	NA	16.6926	2.9351	6.05606	NA	9.84814	2.70766	9	NA	6	3	2.77692	NA	3.53982	2.76753
Cdc73	16.396	NA	7.30487	9.09115	6.12248	NA	4.57698	8.89545	9	NA	4	5	3.36072	NA	2.50627	4.89237
Cdca2	44.8393	NA	31.7808	13.0585	11.4037	NA	10.7768	25.8072	20	NA	16	4	5.08647	NA	5.42557	7.90514
Cdca3	7.75604	NA	5.73431	2.02172	5.21239	NA	7.15894	3.60378	10	NA	6	4	6.72043	NA	7.49064	7.13012
Cdca4	53.6917	NA	33.0352	20.6566	22.1958	NA	46.2678	17.8381	31	NA	18	13	12.8152	NA	25.2101	11.2263
Cdca5	16.2799	NA	9.3067	6.97324	8.54142	NA	11.7065	6.67296	9	NA	5	4	4.72193	NA	6.28931	3.82775
Cdca7	1.51852	NA	NA	1.51852	0.64317	NA	NA	1.33204	1	NA	NA	1	0.423549	NA	NA	0.877193
Cdca7l	9.91435	NA	5.60877	4.30558	3.79715	NA	4.25875	3.52628	8	NA	4	4	3.06396	NA	3.03721	3.276
Cdca8	3.0905	0.838998	1.05971	1.19179	1.90068	3.5702	1.21806	2.2875	5	2	1	2	3.07503	8.51064	1.14943	3.83877
Cdcp1	72.9709	0.542941	41.5538	30.8742	18.9584	4.20885	16.6082	25.3483	51	1	33	17	13.2502	7.75194	13.1894	13.9573
Cdh1	55.2101	5.17278	21.9876	28.0497	12.5108	40.7306	8.28157	17.1979	89	2	51	36	20.1677	15.748	19.209	22.0723
Cdh13	3.83263	NA	3.83263	NA	1.67364	NA	1.78678	NA	6	NA	6	NA	2.62009	NA	2.7972	NA
Cdh24	6.56245	NA	6.56245	NA	2.40559	NA	2.79729	NA	2	NA	2	NA	0.733138	NA	0.852515	NA
Cdh3	70.2031	NA	26.1278	44.0753	17.3899	NA	10.5824	30.1679	64	NA	43	21	15.8534	NA	17.416	14.3737
Cdh4	35.9083	NA	5.04497	30.8633	5.66109	NA	1.83989	8.92778	5	NA	1	4	0.788271	NA	0.364697	1.15707
Cdip1	38.0461	0.669243	7.40629	29.9706	9.76042	3.4497	11.8123	9.7402	24	1	8	15	6.157	5.15464	12.7592	4.87488
Cdipt	13.4545	NA	2.6723	10.7822	5.81689	NA	4.16246	13.133	14	NA	3	11	6.05275	NA	4.6729	13.3983
Cdk1	8.87483	NA	5.04084	3.83399	3.10309	NA	5.63853	2.05796	11	NA	8	3	3.84615	NA	8.94855	1.61031
Cdk10	4.98606	NA	0.901451	4.08461	3.02369	NA	0.992787	7.78021	4	NA	2	2	2.42571	NA	2.20264	3.80952
Cdk11b	4.69316	NA	4.69316	NA	1.81273	NA	1.99285	NA	5	NA	5	NA	1.93125	NA	2.12314	NA
Cdk12	108.656	NA	90.6665	17.9891	12.4834	NA	20.22	4.32742	46	NA	41	5	5.28493	NA	9.14362	1.20279
Cdk13	159.936	3.98548	115.018	40.9327	22.5867	8.93605	25.3567	19.5011	63	1	52	10	8.89705	2.24215	11.4638	4.76417
Cdk16	9.51544	NA	3.94851	5.56694	3.12802	NA	2.64823	4.52229	14	NA	7	7	4.60224	NA	4.69484	5.68643
Cdk17	18.9924	NA	NA	18.9924	5.2134	NA	NA	11.0614	5	NA	NA	5	1.3725	NA	NA	2.91206
Cdk18	1.85086	NA	NA	1.85086	0.607636	NA	NA	1.33251	1	NA	NA	1	0.328299	NA	NA	0.719942
Cdk19	82.4247	1.35019	2.64077	78.4337	14.194	1.80748	2.52706	19.5352	34	1	3	30	5.855	1.33869	2.87081	7.47198
Cdk2	11.3739	NA	0.92068	10.4532	4.67677	NA	0.884419	8.95735	10	NA	1	9	4.11184	NA	0.960615	7.71208
Cdk20	14.9691	NA	13.48	1.48908	8.19327	NA	12.9491	2.00414	3	NA	2	1	1.64204	NA	1.92123	1.3459
Cdk2ap2	1.1864	NA	NA	1.1864	1.3023	NA	NA	2.62477	1	NA	NA	1	1.09769	NA	NA	2.21239
Cdk4	4.30763	NA	2.01009	2.29754	3.20032	NA	2.20405	8.80285	9	NA	7	2	6.68648	NA	7.67544	7.66284
Cdk5	0.904325	NA	0.904325	NA	0.439419	NA	1.02881	NA	1	NA	1	NA	0.485909	NA	1.13766	NA
Cdk5r1	4.34489	NA	NA	4.34489	1.05101	NA	NA	1.58168	1	NA	NA	1	0.241896	NA	NA	0.364033
Cdk5rap1	3.76887	NA	1.65318	2.11569	1.91313	NA	0.935584	14.591	3	NA	3	NA	1.52284	NA	1.69779	NA
Cdk5rap2	27.6875	NA	27.6875	NA	4.94155	NA	5.06263	NA	10	NA	10	NA	1.78476	NA	1.82849	NA
Cdk5rap3	3.82799	NA	1.34591	2.48208	2.04159	NA	0.890152	9.15897	4	NA	2	2	2.13333	NA	1.32275	7.38007
Cdk6	13.7893	NA	3.71583	10.0735	5.58271	NA	3.7878	7.02473	9	NA	2	7	3.64372	NA	2.03874	4.88145
Cdk7	10.1384	NA	0.657214	9.48117	1.33452	NA	0.631329	1.46926	5	NA	1	4	0.658155	NA	0.960615	0.619867
Cdk8	5.12437	NA	NA	5.12437	1.98158	NA	NA	4.3686	4	NA	1	3	1.54679	NA	0.716846	2.55754
Cdk9	31.3496	NA	6.32686	25.0227	9.2504	NA	5.65403	11.6819	15	NA	7	8	4.42608	NA	6.25559	3.73483
Cdkal1	23.5501	NA	1.28634	22.2637	9.279	NA	0.740554	30.4566	7	NA	3	4	2.75808	NA	1.72712	5.47196
Cdkl5	5.32666	NA	5.32666	NA	1.64099	NA	1.8909	NA	1	NA	1	NA	0.308071	NA	0.354988	NA
Cdkn1a	10.5143	0.692267	2.70447	7.11754	5.18967	3.19017	5.63431	5.35556	14	1	5	8	6.91017	4.60829	10.4167	6.01956
Cdkn1b	24.8234	5.76453	12.6982	6.36069	10.3216	11.107	21.3774	4.92313	19	4	7	8	7.90021	7.70713	11.7845	6.19195
Cdkn1c	7.86102	NA	3.90623	3.9548	4.0479	NA	3.76685	5.74825	6	NA	2	4	3.0896	NA	1.92864	5.81395
Cdkn2aip	27.6062	NA	22.2708	5.33538	7.90103	NA	13.1624	3.2513	10	NA	8	2	2.86205	NA	4.72813	1.21877
Cdkn2aipnl	34.1253	NA	NA	34.1253	18.3076	NA	NA	23.9476	18	NA	NA	18	9.65665	NA	NA	12.6316
Cdkn2c	18.4477	NA	18.4477	NA	16.6796	NA	36.3859	NA	6	NA	6	NA	5.42495	NA	11.8343	NA
Cdkn2d	20.0532	1.09815	7.04511	11.91	15.79	4.22364	14.0621	23.3988	9	1	3	5	7.08661	3.84615	5.98802	9.82318
Cdon	54.8683	NA	20.0258	34.8425	7.60581	NA	5.33595	10.1522	50	NA	16	34	6.93097	NA	4.26326	9.90676
Cdpf1	4.11081	NA	1.17382	2.937	3.88913	NA	3.2606	6.7986	2	NA	1	1	1.89215	NA	2.77778	2.31481
Cdr2	2.43295	NA	NA	2.43295	0.963925	NA	NA	2.71534	1	NA	NA	1	0.396197	NA	NA	1.11607
Cdr2l	40.4114	NA	11.45	28.9614	10.922	NA	8.19029	15.2831	8	NA	3	5	2.16216	NA	2.14592	2.63852
Cds1	42.0028	NA	3.856	38.1468	10.7205	NA	2.78211	16.6653	28	NA	5	23	7.1465	NA	3.6075	10.0481
Cds2	11.5189	NA	NA	11.5189	1.28202	NA	NA	1.57298	7	NA	NA	7	0.779076	NA	NA	0.955892
Cdt1	14.0687	NA	1.34829	12.7204	6.42114	NA	0.805428	26.7236	15	NA	4	11	6.84619	NA	2.38949	23.1092
Cdv3	12.1935	NA	1.56306	10.6304	2.6787	NA	2.42335	3.65055	12	NA	2	10	2.6362	NA	3.10078	3.43407
Cdyl	25.6824	NA	19.4629	6.21952	6.53662	NA	10.7768	4.46164	15	NA	10	5	3.81777	NA	5.5371	3.5868
Cdyl2	0.545398	NA	NA	0.545398	0.0674413	NA	NA	0.0851519	1	NA	NA	1	0.123655	NA	NA	0.156128
Cebpa	88.5064	29.8001	12.3352	46.3711	33.5379	38.9543	27.971	32.3595	30	5	6	19	11.3679	6.53595	13.6054	13.2589
Cebpb	20.903	6.34301	2.11492	12.4451	13.7701	11.3268	4.82858	23.9328	9	3	1	5	5.92885	5.35714	2.28311	9.61538
Cebpd	39.9267	NA	NA	39.9267	17.6667	NA	NA	28.2367	5	NA	NA	5	2.21239	NA	NA	3.53607
Cebpg	58.1024	2.13836	20.5761	35.3879	12.357	7.45073	45.4219	8.93184	25	1	6	18	5.31689	3.48432	13.245	4.54316
Cebpz	46.8189	NA	46.8189	NA	11.4837	NA	14.8208	NA	18	NA	18	NA	4.41501	NA	5.69801	NA
Cebpzos	3.38991	NA	NA	3.38991	2.24052	NA	NA	3.15634	2	NA	NA	2	1.32188	NA	NA	1.8622
Cecr2	140.742	NA	89.5706	51.1716	15.2765	NA	20.9375	10.7188	63	NA	43	20	6.83816	NA	10.0514	4.18936
Cecr5	52.7755	NA	2.80201	49.9735	27.6601	NA	2.22382	77.9618	6	NA	2	4	3.14465	NA	1.5873	6.24025
Celf1	21.429	NA	3.27676	18.1523	2.6904	NA	2.13887	3.00335	25	NA	4	21	3.13873	NA	2.61097	3.47452
Celf2	18.4262	NA	NA	18.4262	1.93614	NA	NA	2.49441	5	NA	NA	5	0.525376	NA	NA	0.676865
Celf4	21.9698	NA	NA	21.9698	3.96138	NA	NA	6.19566	2	NA	NA	2	0.36062	NA	NA	0.564016
Celsr1	308.63	NA	213.65	94.9803	27.9303	NA	23.4651	49.0094	201	NA	150	51	18.19	NA	16.4745	26.3158
Celsr2	231.206	NA	132.393	98.8134	21.9298	NA	15.1133	55.4198	107	NA	76	31	10.1489	NA	8.6758	17.3864
Cenpa	8.68033	NA	0.915388	7.76495	6.4924	NA	2.26022	9.6459	10	NA	3	7	7.47943	NA	7.40741	8.69565
Cenpc1	16.0809	NA	16.0809	NA	5.03947	NA	5.90994	NA	6	NA	6	NA	1.88029	NA	2.20507	NA
Cenpe	42.0916	NA	24.187	17.9045	5.38737	NA	3.26146	59.4835	18	NA	16	2	2.30385	NA	2.1575	6.64452
Cenpf	187.519	NA	181.83	5.68862	16.8602	NA	20.2169	2.86581	71	NA	67	4	6.38374	NA	7.44941	2.01511
Cenph	1.53866	NA	1.53866	NA	1.24186	NA	2.11937	NA	1	NA	1	NA	0.807103	NA	1.37741	NA
Cenpi	9.46402	NA	2.65385	6.81017	3.00636	NA	1.18423	10.691	3	NA	1	2	0.952986	NA	0.446229	3.13972
Cenpj	49.3569	NA	49.3569	NA	11.3126	NA	12.2322	NA	8	NA	8	NA	1.8336	NA	1.98265	NA
Cenpl	56.7026	1.96879	28.8523	25.8815	13.1044	4.20682	29.1437	9.0211	15	2	8	5	3.46661	4.2735	8.08081	1.74277
Cenpm	15.2039	NA	NA	15.2039	11.4487	NA	NA	25.6389	1	NA	NA	1	0.753012	NA	NA	1.68634
Cenpn	15.4683	NA	NA	15.4683	8.74906	NA	NA	26.3965	6	NA	NA	6	3.39367	NA	NA	10.2389
Cenpo	31.4754	NA	2.35332	29.1221	7.24739	NA	2.62354	10.3197	6	NA	1	5	1.38153	NA	1.11483	1.77179
Cenpp	3.9249	NA	0.259006	3.6659	3.72382	NA	0.30082	24.2775	3	NA	1	2	2.8463	NA	1.16144	13.245
Cenpq	1.66341	NA	NA	1.66341	1.15355	NA	NA	3.8416	1	NA	NA	1	0.693481	NA	NA	2.30947
Cenpt	0.755267	NA	0.755267	NA	0.427429	NA	0.487898	NA	3	NA	2	1	1.69779	NA	1.29199	5.15464
Cenpu	26.1773	NA	NA	26.1773	10.611	NA	NA	21.5274	8	NA	1	7	3.24281	NA	0.81103	5.75658
Cep104	2.48515	NA	1.33451	1.15064	0.758362	NA	0.479868	2.73962	3	NA	2	1	0.915471	NA	0.719166	2.38095
Cep128	20.2361	NA	2.80453	17.4315	4.20971	NA	0.847546	16.9074	4	NA	2	2	0.83212	NA	0.604412	1.93986
Cep131	2.9381	NA	NA	2.9381	0.821158	NA	NA	14.3322	2	NA	NA	2	0.558971	NA	NA	9.7561
Cep135	1.58526	NA	1.58526	NA	0.298317	NA	0.463119	NA	1	NA	1	NA	0.188182	NA	0.292141	NA
Cep152	68.9326	NA	68.9326	NA	11.9509	NA	13.2283	NA	13	NA	13	NA	2.25381	NA	2.49472	NA
Cep162	62.4228	NA	27.0062	35.4166	11.789	NA	6.41173	47.034	6	NA	4	2	1.13314	NA	0.949668	2.65604
Cep164	37.8169	NA	12.391	25.4259	6.89083	NA	3.0962	19.3795	11	NA	6	5	2.00437	NA	1.49925	3.81098
Cep170	41.1157	NA	16.3321	24.7837	5.93301	NA	3.44777	12.2268	7	NA	4	3	1.0101	NA	0.844416	1.48002
Cep170b	156.12	NA	131.485	24.6348	23.512	NA	27.8275	14.6723	103	NA	86	17	15.512	NA	18.2011	10.1251
Cep19	29.7292	NA	NA	29.7292	17.4775	NA	NA	37.7754	3	NA	NA	3	1.76367	NA	NA	3.81194
Cep192	76.1162	NA	70.3937	5.72254	9.40519	NA	9.32985	19.5309	23	NA	21	2	2.84196	NA	2.7833	6.82594
Cep250	81.6636	0.903217	72.1445	8.61585	10.231	4.40594	9.87199	18.3707	29	1	25	3	3.63317	4.87805	3.42091	6.39659
Cep290	16.6668	NA	9.91476	6.75202	2.08179	NA	1.33263	12.3212	2	NA	1	1	0.249813	NA	0.134409	1.82482
Cep350	215.549	NA	84.6893	130.859	16.1981	NA	9.11814	36.3599	79	NA	32	47	5.93673	NA	3.44531	13.0592
Cep41	11.1845	NA	NA	11.1845	3.30903	NA	NA	4.98196	2	NA	NA	2	0.591716	NA	NA	0.890869
Cep44	0.579607	NA	0.579607	NA	0.414301	NA	0.499231	NA	1	NA	1	NA	0.714796	NA	0.861326	NA
Cep55	13.0131	NA	9.16554	3.84754	4.68433	NA	6.59866	4.15052	5	NA	3	2	1.79986	NA	2.15983	2.1575
Cep57	13.0015	NA	4.43665	8.56484	5.14096	NA	2.95186	10.4577	12	NA	3	9	4.74496	NA	1.99601	10.989
Cep57l1	19.5524	NA	NA	19.5524	8.1912	NA	NA	22.8683	3	NA	NA	3	1.25681	NA	NA	3.50877
Cep63	12.9468	NA	0.922051	12.0247	4.80223	NA	0.404941	43.5679	5	NA	1	4	1.8546	NA	0.439174	14.4928
Cep68	66.3691	NA	59.4174	6.95173	13.7982	NA	26.9834	2.8386	26	NA	21	5	5.40541	NA	9.53678	2.04165
Cep70	2.71084	NA	NA	2.71084	1.05112	NA	NA	4.41506	2	NA	NA	2	0.775494	NA	NA	3.25733
Cep72	19.1319	NA	12.3188	6.81311	5.2676	NA	6.34664	4.0846	6	NA	4	2	1.65198	NA	2.06079	1.19904
Cep76	3.10699	NA	3.10699	NA	0.780846	NA	1.56919	NA	1	NA	1	NA	0.251319	NA	0.505051	NA
Cep78	25.0303	NA	22.0159	3.01438	9.81966	NA	9.27768	44.9907	13	NA	13	NA	5.10004	NA	5.4783	NA
Cep83	10.6008	NA	9.9883	0.612526	3.55017	NA	4.80437	1.16009	7	NA	6	1	2.34427	NA	2.886	1.89394
Cep83os	4.04794	NA	4.04794	NA	Inf	NA	Inf	NA	2	NA	2	NA	Inf	NA	Inf	NA
Cep85	11.1177	NA	7.30777	3.80989	2.87575	NA	3.19675	2.68114	6	NA	3	3	1.55199	NA	1.31234	2.11119
Cep85l	17.1328	NA	17.1328	NA	6.36671	NA	7.07676	NA	2	NA	2	NA	0.743218	NA	0.826105	NA
Cep89	2.84611	NA	2.84611	NA	1.10873	NA	1.19786	NA	2	NA	2	NA	0.77912	NA	0.841751	NA
Cep95	1.06711	1.06711	NA	NA	0.391311	9.97296	NA	NA	1	1	NA	NA	0.366703	9.34579	NA	NA
Cep97	71.146	NA	71.146	NA	8.35832	NA	27.3849	NA	14	NA	14	NA	1.64474	NA	5.38876	NA
Cept1	13.9528	NA	7.43473	6.51808	5.03167	NA	5.94303	4.77515	10	NA	4	6	3.6062	NA	3.19744	4.3956
Cercam	6.00529	NA	6.00529	NA	2.21189	NA	3.37565	NA	2	NA	2	NA	0.736648	NA	1.12423	NA
Cerk	61.4907	NA	2.15894	59.3318	13.5263	NA	1.35272	24.1481	30	NA	3	27	6.59921	NA	1.8797	10.989
Cers2	3.92741	NA	2.65611	1.27131	1.94715	NA	2.3238	1.63197	5	NA	4	1	2.47893	NA	3.49956	1.2837
Cers3	34.3758	NA	11.4295	22.9463	10.5739	NA	9.07104	12.4034	14	NA	4	10	4.30637	NA	3.1746	5.40541
Cers4	9.28312	NA	NA	9.28312	2.53084	NA	NA	4.0379	1	NA	NA	1	0.272628	NA	NA	0.434972
Cers5	31.3096	NA	9.9216	21.388	15.5769	NA	7.96916	34.0032	14	NA	6	8	6.96517	NA	4.81928	12.7186
Cers6	7.81696	NA	1.62587	6.19109	1.98905	NA	1.40768	2.2964	5	NA	2	3	1.27226	NA	1.7316	1.11276
Ces2f	4.97553	NA	NA	4.97553	2.72931	NA	NA	43.645	NA	NA	NA	NA	NA	NA	NA	NA
Ces2g	10.4351	NA	3.70249	6.73265	3.64993	NA	2.19994	6.08739	9	NA	5	4	3.14795	NA	2.97089	3.61664
Cetn2	2.44288	NA	1.68315	0.759734	2.05976	NA	3.24305	1.18894	3	NA	2	1	2.52951	NA	3.85356	1.56495
Cetn3	4.92051	0.596875	1.47936	2.84427	4.85736	12.1811	2.93524	6.1832	6	1	3	2	5.923	20.4082	5.95238	4.34783
Cfdp1	6.09294	NA	1.30807	4.78486	5.01476	NA	1.47306	21.361	9	NA	5	4	7.40741	NA	5.63063	17.8571
Cfl1	10.9784	NA	3.97177	7.00662	9.27229	NA	7.92768	13.0235	14	NA	7	7	11.8243	NA	13.9721	13.0112
Cfl2	22.2815	NA	8.35299	13.9285	7.58391	NA	16.6726	6.04012	21	NA	7	14	7.14772	NA	13.9721	6.07112
Cflar	19.3705	2.53335	16.0093	0.827863	2.35709	4.29381	10.8025	0.134699	7	2	4	1	0.851789	3.38983	2.69906	0.162707
Cggbp1	37.1134	4.29593	20.4261	12.3914	8.59106	10.713	40.5279	3.62852	26	4	9	13	6.01852	9.97506	17.8571	3.80673
Cgnl1	19.7896	NA	4.54352	15.2461	2.93006	NA	1.1668	5.54202	3	NA	1	2	0.444181	NA	0.256805	0.727008
Cgrrf1	12.8651	NA	4.11059	8.75453	10.7031	NA	4.1147	51.1961	2	NA	1	1	1.66389	NA	1.001	5.84795
Ch25h	61.2378	NA	42.4481	18.7897	45.2942	NA	47.3223	42.1294	12	NA	10	2	8.87574	NA	11.1483	4.4843
Chaf1a	76.2743	NA	47.5793	28.6949	23.0575	NA	17.3901	60.2835	24	NA	15	9	7.25514	NA	5.48246	18.9076
Chaf1b	10.719	NA	10.719	NA	5.60323	NA	6.23559	NA	8	NA	8	NA	4.18191	NA	4.65387	NA
Champ1	89.397	NA	82.8717	6.52532	22.2769	NA	34.4009	4.70463	28	NA	23	5	6.97732	NA	9.54753	3.6049
Chchd1	3.60978	NA	1.288	2.32178	6.06686	NA	3.60785	12.1559	4	NA	2	2	6.72269	NA	5.60224	10.4712
Chchd2	0.991651	NA	NA	0.991651	1.08973	NA	NA	4.40734	1	NA	NA	1	1.0989	NA	NA	4.44444
Chchd3	9.02341	NA	NA	9.02341	6.30126	NA	NA	13.3482	8	NA	NA	8	5.58659	NA	NA	11.8343
Chchd4	15.7508	NA	6.26783	9.48297	12.6512	NA	14.9234	12.8322	6	NA	3	3	4.81928	NA	7.14286	4.05954
Chchd5	4.47841	NA	NA	4.47841	3.43964	NA	NA	5.5085	1	NA	NA	1	0.768049	NA	NA	1.23001
Chchd6	0.776981	NA	0.776981	NA	0.690036	NA	0.945232	NA	1	NA	1	NA	0.888099	NA	1.21655	NA
Chchd7	11.6477	NA	11.6477	NA	16.7593	NA	45.1462	NA	3	NA	3	NA	4.31655	NA	11.6279	NA
Chd1	50.0753	NA	10.6728	39.4025	6.32424	NA	2.07804	17.2138	23	NA	9	14	2.90477	NA	1.75234	6.11621
Chd1l	1.07395	NA	1.07395	NA	0.3593	NA	0.397317	NA	1	NA	1	NA	0.33456	NA	0.369959	NA
Chd2	82.9078	5.06912	25.3977	52.441	9.13987	8.86209	4.63123	17.3934	42	3	17	22	4.63014	5.24476	3.09993	7.29685
Chd3	65.0575	NA	41.1608	23.8967	8.93525	NA	6.67329	22.1676	84	NA	63	21	11.5369	NA	10.214	19.4805
Chd3os	17.4113	NA	17.4113	NA	Inf	NA	Inf	NA	1	NA	1	NA	Inf	NA	Inf	NA
Chd4	41.9197	1.84914	23.8393	16.2313	6.52447	10.4471	4.14741	32.4625	50	1	39	10	7.7821	5.64972	6.78497	20
Chd6	194.516	NA	168.525	25.9907	18.4393	NA	20.7135	11.1933	74	NA	62	12	7.01488	NA	7.62045	5.16796
Chd7	30.9898	NA	30.9898	NA	2.74101	NA	3.4583	NA	3	NA	3	NA	0.265346	NA	0.334784	NA
Chd8	109.37	NA	84.0214	25.3487	13.3541	NA	10.8429	57.48	49	NA	43	6	5.98291	NA	5.5491	13.6054
Chd9	178.19	NA	135.941	42.2494	15.472	NA	15.7887	16.6599	34	NA	26	8	2.95216	NA	3.01974	3.15457
Chdh	130.516	NA	41.7711	88.7448	22.1551	NA	23.3228	24.8168	78	NA	22	56	13.2405	NA	12.2836	15.66
Chek1	4.39133	NA	1.47251	2.91883	1.29271	NA	1.029	1.57519	2	NA	1	1	0.588755	NA	0.698812	0.539665
Chek2	0.909514	NA	NA	0.909514	0.404768	NA	NA	1.60408	1	NA	NA	1	0.445038	NA	NA	1.76367
Cherp	7.63957	NA	4.39622	3.24335	2.01041	NA	1.5606	3.89826	10	NA	6	4	2.63158	NA	2.12993	4.80769
Chfr	10.3129	NA	1.33636	8.97659	3.01284	NA	0.848483	8.39718	8	NA	3	5	2.33713	NA	1.90476	4.67727
Chic2	5.08754	1.11334	NA	3.97421	4.56282	3.39431	NA	13.7516	3	1	NA	2	2.69058	3.04878	NA	6.92042
Chid1	39.7561	NA	1.16855	38.5875	9.41418	NA	0.981152	13.2512	10	NA	1	9	2.36798	NA	0.839631	3.09066
Chka	9.06367	NA	NA	9.06367	3.4502	NA	NA	9.4217	5	NA	NA	5	1.90331	NA	NA	5.19751
ChkbCpt1b	6.827	3.23506	1.5245	2.06744	Inf	Inf	Inf	Inf	5	1	2	2	Inf	Inf	Inf	Inf
Chl1	35.1155	NA	3.91754	31.1979	4.53045	NA	1.07921	8.43188	15	NA	4	11	1.93523	NA	1.10193	2.97297
Chm	10.887	NA	3.92711	6.95985	2.23689	NA	1.97442	2.44034	4	NA	1	3	0.821862	NA	0.502765	1.05189
Chmp1a	18.7202	NA	NA	18.7202	8.62284	NA	NA	12.787	8	NA	NA	8	3.68494	NA	NA	5.46448
Chmp2a	5.53103	NA	2.37394	3.15709	5.96659	NA	3.54849	45.755	7	NA	5	2	7.55124	NA	7.47384	28.9855
Chmp2b	9.54781	0.594305	1.3098	7.64371	5.19467	3.14447	2.04018	7.59058	11	1	2	8	5.98477	5.29101	3.11526	7.94439
Chmp3	12.5299	NA	0.618	11.9119	4.83405	NA	0.915556	6.68454	8	NA	1	7	3.08642	NA	1.48148	3.92817
Chmp4b	11.3851	NA	2.00335	9.38177	7.08911	NA	2.96792	12.1055	9	NA	3	6	5.60399	NA	4.44444	7.74194
Chmp4c	3.23988	NA	NA	3.23988	1.80999	NA	NA	3.13942	1	NA	NA	1	0.558659	NA	NA	0.968992
Chmp5	4.479	NA	1.19127	3.28772	3.26457	NA	1.80496	5.00415	6	NA	2	4	4.37318	NA	3.0303	6.08828
Chmp6	15.4182	NA	1.2163	14.2019	9.8771	NA	2.01708	15.9035	8	NA	1	7	5.12492	NA	1.65837	7.83875
Chmp7	43.1445	NA	NA	43.1445	15.944	NA	NA	33.9988	15	NA	1	14	5.54324	NA	0.737463	11.0323
Chordc1	1.401	NA	1.401	NA	0.635375	NA	1.40663	NA	1	NA	1	NA	0.453515	NA	1.00402	NA
Chp1	4.5505	NA	0.632255	3.91824	1.75424	NA	1.07526	2.10432	4	NA	1	3	1.54202	NA	1.70068	1.61117
Chpf	61.6648	4.67073	36.177	20.8171	19.0618	4.6942	19.6721	51.9129	12	1	7	4	3.70943	1.00503	3.80642	9.97506
Chpf2	77.995	2.36958	67.3605	8.26489	20.9833	1.83973	29.1983	67.745	23	1	21	1	6.18779	0.776398	9.10273	8.19672
Chpt1	7.36842	NA	NA	7.36842	2.16019	NA	NA	3.58386	1	NA	1	NA	0.293169	NA	0.805153	NA
Chrac1	18.503	NA	NA	18.503	21.7427	NA	NA	42.4382	11	NA	NA	11	12.926	NA	NA	25.2294
Chrm1	14.9983	NA	14.9983	NA	2.38599	NA	10.8448	NA	1	NA	1	NA	0.159084	NA	0.723066	NA
Chrm4	6.72023	NA	6.72023	NA	2.42783	NA	4.66683	NA	1	NA	1	NA	0.361272	NA	0.694444	NA
Chst11	32.5438	NA	13.3095	19.2343	5.89669	NA	12.568	4.70047	12	NA	5	7	2.17431	NA	4.72144	1.71065
Chst12	47.7464	NA	21.483	26.2634	26.7337	NA	17.05	73.1572	5	NA	4	1	2.79955	NA	3.1746	2.78552
Chst14	55.1005	NA	17.3209	37.7796	26.4018	NA	15.3147	47.1656	15	NA	4	11	7.18735	NA	3.53669	13.7328
Chst15	170.394	18.0482	48.5235	103.823	39.9518	32.2289	28.7802	51.4228	68	4	17	47	15.9437	7.14286	10.083	23.2789
Chst2	92.528	7.72475	82.6707	2.13258	14.8235	8.81821	51.8962	0.565221	23	2	20	1	3.68472	2.28311	12.5549	0.265041
Chst3	89.4532	NA	17.0052	72.448	14.6357	NA	11.8339	17.7699	20	NA	5	15	3.27225	NA	3.47947	3.67918
Chst5	5.64832	NA	5.64832	NA	2.91903	NA	4.75448	NA	1	NA	1	NA	0.516796	NA	0.841751	NA
Chsy1	108.739	NA	75.6367	33.1022	26.039	NA	31.476	24.0393	36	NA	24	12	8.62069	NA	9.98752	8.7146
Chtf18	1.70259	NA	1.70259	NA	0.548161	NA	0.585082	NA	2	NA	2	NA	0.643915	NA	0.687285	NA
Chtf8	60.0694	NA	14.163	45.9064	20.4945	NA	38.6967	18.8218	29	NA	6	23	9.89423	NA	16.3934	9.43009
Chtop	20.596	6.98047	1.84727	11.7683	6.34309	4.28776	2.73669	12.4664	17	11	1	5	5.2356	6.75676	1.48148	5.29661
Chuk	3.89909	NA	2.47434	1.42475	1.11403	NA	1.13658	1.15085	3	NA	2	1	0.857143	NA	0.918695	0.807754
Churc1	2.92746	NA	2.26652	0.660944	4.58132	NA	6.6859	2.42104	3	NA	2	1	4.69484	NA	5.89971	3.663
Ciao1	13.473	NA	2.37029	11.1027	4.38147	NA	2.32381	5.97242	7	NA	4	3	2.27642	NA	3.92157	1.61377
Ciapin1	1.8495	NA	NA	1.8495	0.427433	NA	NA	0.564045	1	NA	NA	1	0.231107	NA	NA	0.304971
Cib2	3.65541	NA	0.829317	2.82609	4.96658	NA	1.47042	25.4603	1	NA	1	NA	1.3587	NA	1.77305	NA
Cic	57.8449	NA	52.823	5.02183	9.47966	NA	10.9637	8.19222	38	NA	36	2	6.22747	NA	7.47198	3.26264
Cinp	27.0528	NA	1.7187	25.3341	12.4152	NA	2.17833	19.2362	7	NA	3	4	3.21248	NA	3.80228	3.03721
Cipc	36.6626	NA	32.0255	4.63713	8.17268	NA	31.3055	1.71809	13	NA	10	3	2.8979	NA	9.77517	1.11152
Cirh1a	11.1767	NA	5.17468	6.00205	4.96965	NA	2.51076	53.1155	7	NA	6	1	3.11249	NA	2.91121	8.84956
Cisd1	3.13102	NA	NA	3.13102	3.24458	NA	NA	5.76615	3	NA	1	2	3.10881	NA	3.0581	3.68324
Cisd2	11.0063	NA	NA	11.0063	3.83629	NA	NA	4.60708	5	NA	NA	5	1.74277	NA	NA	2.09293
Cish	64.5399	8.46104	17.8635	38.2154	29.8658	25.9541	23.0795	36.0182	37	4	13	20	17.1217	12.2699	16.7959	18.8501
Cit	2.30042	NA	2.30042	NA	0.333587	NA	0.37296	NA	3	NA	3	NA	0.435035	NA	0.486381	NA
Cited2	58.4952	2.71904	20.18	35.5962	29.7081	11.3293	24.9135	38.7337	18	NA	9	9	9.1417	NA	11.1111	9.79325
Ciz1	8.66335	NA	8.66335	NA	2.63004	NA	3.41346	NA	9	NA	9	NA	2.73224	NA	3.5461	NA
Ckap2	32.9454	NA	29.3697	3.5757	12.6664	NA	14.7217	6.17564	20	NA	17	3	7.68935	NA	8.5213	5.18135
Ckap2l	68.5958	NA	55.5188	13.077	21.8667	NA	24.8073	15.7935	42	NA	35	7	13.3886	NA	15.639	8.45411
Ckap4	50.2817	NA	31.0486	19.2332	17.2493	NA	17.9679	16.5092	25	NA	15	10	8.57633	NA	8.68056	8.58369
Ckap5	34.4865	NA	15.3038	19.1827	5.2435	NA	2.50923	43.4982	30	NA	20	10	4.56135	NA	3.27923	22.6757
Ckb	3.03691	NA	1.68692	1.34999	2.05474	NA	1.47201	6.49033	2	NA	1	1	1.35318	NA	0.8726	4.80769
Ckmt1	11.6297	NA	6.44426	5.18545	7.31889	NA	5.1267	42.1581	17	NA	15	2	10.6986	NA	11.9332	16.2602
Cks2	1.67361	1.67361	NA	NA	2.41154	9.24645	NA	NA	1	1	NA	NA	1.44092	5.52486	NA	NA
Clasp1	78.0013	10.167	13.303	54.5312	9.87483	13.5923	2.84071	22.0953	38	4	16	18	4.81074	5.34759	3.41661	7.29335
Clasp2	11.6478	NA	2.51398	9.13381	1.48266	NA	0.586694	3.67706	15	NA	3	12	1.90937	NA	0.700117	4.83092
Clasrp	1.34809	NA	1.34809	NA	0.625855	NA	0.671695	NA	1	NA	1	NA	0.464253	NA	0.498256	NA
Clca1	18.8535	NA	17.3671	1.48644	6.23875	NA	6.41088	5.02175	13	NA	12	1	4.30179	NA	4.42968	3.37838
Clca2	18.9567	NA	16.7199	2.23684	5.18793	NA	6.17196	2.43135	18	NA	15	3	4.92611	NA	5.5371	3.26087
Clca5	20.3513	NA	12.9714	7.37985	5.19033	NA	4.58517	7.27079	11	NA	7	4	2.80541	NA	2.47437	3.94089
Clcc1	12.3303	NA	8.93196	3.39838	3.4251	NA	5.50337	2.46975	9	NA	7	2	2.5	NA	4.313	1.45349
Clcf1	18.5797	NA	18.5797	NA	22.7136	NA	27.4037	NA	2	NA	2	NA	2.44499	NA	2.94985	NA
Clcn2	3.82306	NA	1.76566	2.05739	1.04885	NA	0.647475	7.4274	3	NA	1	2	0.823045	NA	0.366703	7.22022
Clcn3	98.0504	NA	59.9719	38.0785	16.2389	NA	23.0839	14.1241	26	NA	15	11	4.30606	NA	5.77367	4.08012
Clcn4-2	60.207	NA	22.9347	37.2723	13.1514	NA	10.2204	19.9531	30	NA	13	17	6.55308	NA	5.79323	9.10064
Clcn5	19.5588	NA	19.5588	NA	4.49318	NA	8.13595	NA	2	NA	2	NA	0.459453	NA	0.831947	NA
Clcn6	3.85316	NA	NA	3.85316	1.32411	NA	NA	12.9736	1	NA	NA	1	0.343643	NA	NA	3.367
Clcn7	4.09802	NA	1.11817	2.97984	1.00862	NA	0.463587	1.90041	4	NA	2	2	0.984494	NA	0.829187	1.27551
Cldn1	51.9262	4.69643	3.32234	43.9074	16.0217	22.0489	5.22381	18.3559	48	4	7	37	14.8102	18.7793	11.0063	15.4682
Cldn12	18.5905	NA	16.3356	2.2549	4.56098	NA	22.2254	0.842639	6	NA	4	2	1.47203	NA	5.44218	0.747384
Cldn25	12.9093	NA	5.51026	7.39901	5.88389	NA	7.23131	6.22812	15	NA	6	9	6.83683	NA	7.87402	7.57576
Cldn4	81.858	6.87	13.3853	61.6027	45.2004	36.3492	21.1458	62.2879	29	3	6	20	16.0133	15.873	9.47867	20.2224
Cldn8	6.6722	NA	6.6722	NA	2.8296	NA	9.841	NA	2	NA	2	NA	0.848176	NA	2.94985	NA
Clec14a	48.1458	NA	18.3341	29.8118	10.6071	NA	13.2855	10.9001	4	NA	2	2	0.881251	NA	1.44928	0.731261
Clec16a	24.9839	NA	6.8137	18.1702	4.00126	NA	2.1902	6.2462	6	NA	2	4	0.960922	NA	0.64288	1.37504
Clec2d	1.2694	NA	1.2694	NA	1.04564	NA	2.0343	NA	1	NA	1	NA	0.823723	NA	1.60256	NA
Clec2l	2.89311	NA	NA	2.89311	2.02457	NA	NA	4.62158	1	NA	NA	1	0.69979	NA	NA	1.59744
Clhc1	71.235	NA	71.235	NA	56.0905	NA	69.6334	NA	8	NA	8	NA	6.29921	NA	7.82014	NA
Clic1	10.8144	NA	6.90073	3.91363	9.33077	NA	9.50514	17.165	15	NA	12	3	12.9422	NA	16.5289	13.1579
Clic4	22.64	0.790771	3.58423	18.265	5.57087	4.62439	4.70371	5.83361	19	1	3	15	4.6752	5.84795	3.93701	4.7908
Clint1	26.0542	NA	18.2538	7.80037	7.66751	NA	9.75097	5.82987	21	NA	15	6	6.18011	NA	8.01282	4.4843
Clip1	83.7442	1.47996	46.0648	36.1994	14.2495	6.7888	11.0309	24.4096	32	1	16	15	5.44495	4.58716	3.83142	10.1146
Clip2	76.9764	NA	40.2811	36.6953	15.4014	NA	12.8121	26.2484	32	NA	17	15	6.40256	NA	5.40712	10.7296
Clip4	16.5317	NA	8.91718	7.61452	3.26584	NA	3.90248	3.33386	5	NA	2	3	0.987752	NA	0.875274	1.31349
Clk1	21.5076	6.21023	12.6362	2.66121	11.7528	36.7469	8.70261	12.7331	25	1	20	4	13.6612	5.91716	13.7741	19.1388
Clk2	20.92	NA	8.57147	12.3486	9.05629	NA	5.71431	24.3082	16	NA	10	6	6.92641	NA	6.66667	11.811
Clk3	10.9613	NA	3.5418	7.4195	4.39507	NA	1.84758	31.7072	8	NA	6	2	3.2077	NA	3.12989	8.54701
Clk4	5.39327	NA	3.82567	1.5676	2.85056	NA	2.64569	4.51758	5	NA	3	2	2.64271	NA	2.07469	5.76369
Clmn	2.28171	NA	2.28171	NA	0.190746	NA	0.722287	NA	1	NA	1	NA	0.0835981	NA	0.316556	NA
Cln5	111.952	NA	95.4568	16.4953	45.7508	NA	93.0378	12.7771	14	NA	9	5	5.72129	NA	8.77193	3.87297
Cln6	15.7821	NA	2.65916	13.1229	7.38861	NA	2.86856	11.7694	12	NA	3	9	5.61798	NA	3.23625	8.07175
Cln8	75.2239	NA	32.4897	42.7342	11.6971	NA	37.4737	8.78401	20	NA	8	12	3.10994	NA	9.22722	2.4666
Clns1a	9.06577	1.58252	NA	7.48325	2.67033	21.6783	NA	2.88261	7	1	NA	6	2.06186	13.6986	NA	2.31125
Clp1	49.0709	NA	49.0709	NA	26.8147	NA	38.3966	NA	8	NA	8	NA	4.37158	NA	6.25978	NA
Clpb	4.24727	NA	2.4879	1.75937	0.945519	NA	1.22316	0.728517	2	NA	1	1	0.445236	NA	0.491642	0.414079
Clpp	9.94236	NA	2.92699	7.01537	8.23725	NA	3.57386	21.6524	6	NA	3	3	4.971	NA	3.663	9.25926
Clptm1	28.6969	NA	5.38611	23.3108	6.94671	NA	2.69981	11.0425	15	NA	5	10	3.63108	NA	2.50627	4.73709
Clptm1l	18.4768	2.77076	3.86397	11.8421	7.76991	11.7405	2.38517	22.686	12	1	5	6	5.04626	4.23729	3.08642	11.4943
Clpx	8.97758	NA	3.61673	5.36085	3.11074	NA	1.89855	7.10988	5	NA	3	2	1.7325	NA	1.5748	2.65252
Clspn	43.9084	NA	34.6653	9.24311	8.81342	NA	8.78048	10.2701	17	NA	15	2	3.41228	NA	3.79939	2.22222
Clstn1	52.5389	NA	15.1966	37.3423	11.7039	NA	5.16891	27.9718	71	NA	35	36	15.8164	NA	11.9048	26.9663
Clta	8.09486	NA	2.90759	5.18727	6.90687	NA	3.89235	18.7945	11	NA	4	7	9.38567	NA	5.35475	25.3623
Cltb	5.55231	NA	1.8719	3.68041	3.52304	NA	2.94324	3.94893	7	NA	2	5	4.44162	NA	3.14465	5.36481
Clu	5.72514	NA	4.72009	1.00505	3.16656	NA	3.50415	4.40812	9	NA	7	2	4.97788	NA	5.19673	8.77193
Cluap1	9.00872	2.37194	0.773038	5.86374	5.6481	19.2841	0.622414	25.4945	4	1	2	1	2.50784	8.13008	1.61031	4.34783
Cluh	38.3357	NA	29.7563	8.5794	7.10051	NA	7.32552	6.93565	27	NA	23	4	5.00093	NA	5.66224	3.23363
Cmas	1.77394	NA	0.394038	1.3799	1.00792	NA	0.303339	3.68957	2	NA	1	1	1.13636	NA	0.769823	2.6738
Cmc2	1.92268	NA	NA	1.92268	1.33519	NA	NA	1.76717	1	NA	NA	1	0.694444	NA	NA	0.919118
Cmip	18.4942	NA	7.12804	11.3662	3.90668	NA	3.02292	5.35384	20	NA	9	11	4.22476	NA	3.81679	5.18135
Cmpk1	0.5109	NA	0.5109	NA	0.271755	NA	0.74693	NA	1	NA	1	NA	0.531915	NA	1.46199	NA
Cmpk2	21.0696	NA	NA	21.0696	6.60695	NA	NA	12.3358	1	NA	NA	1	0.313578	NA	NA	0.58548
Cmss1	160.678	6.76697	94.2224	59.6886	137.214	47.9927	113.384	299.943	38	1	28	9	32.4509	7.0922	33.6943	45.2261
Cmtm3	2.66343	NA	1.48137	1.18206	1.64816	NA	2.66913	1.30471	2	NA	1	1	1.23762	NA	1.8018	1.10375
Cmtm4	14.6045	NA	0.666602	13.9379	1.88884	NA	1.06316	2.01009	7	NA	1	6	0.905329	NA	1.5949	0.865301
Cmtm6	6.63007	NA	NA	6.63007	1.97794	NA	NA	2.39612	6	NA	NA	6	1.78998	NA	NA	2.16841
Cmtm7	7.99219	NA	NA	7.99219	7.02919	NA	NA	18.0819	5	NA	NA	5	4.39754	NA	NA	11.3122
Cmtr1	14.6602	NA	3.60686	11.0533	3.90521	NA	1.43471	10.3884	11	NA	4	7	2.93021	NA	1.59109	6.57895
Cmtr2	76.5235	NA	56.3077	20.2158	21.3932	NA	24.4391	17.9536	12	NA	8	4	3.35477	NA	3.47222	3.5524
Cnbp	17.7468	0.844224	4.86777	12.0348	8.14822	3.89043	9.06476	8.45142	28	1	9	18	12.8558	4.60829	16.7598	12.6404
Cndp2	4.02284	NA	0.451352	3.57149	1.78317	NA	0.316073	6.31005	3	NA	1	2	1.32979	NA	0.70028	3.53357
Cnep1r1	42.7329	NA	NA	42.7329	23.3258	NA	NA	31.2375	15	NA	NA	15	8.18777	NA	NA	10.9649
Cnih1	9.41687	0.620273	NA	8.79659	6.34988	6.59865	NA	9.22075	7	NA	1	6	4.72016	NA	2.29885	6.28931
Cnih4	2.14859	NA	0.765839	1.38275	0.657463	NA	1.82343	0.49632	2	NA	1	1	0.611995	NA	2.38095	0.358938
Cnksr1	8.79308	NA	6.21222	2.58087	3.56428	NA	2.95398	9.45372	10	NA	7	3	4.05351	NA	3.32858	10.989
Cnksr3	51.3353	5.74751	3.56122	42.0265	14.8884	10.3746	2.13503	34.2794	15	2	4	9	4.35035	3.61011	2.39808	7.34095
Cnn3	0.654631	NA	NA	0.654631	0.326825	NA	NA	0.840348	1	NA	NA	1	0.499251	NA	NA	1.2837
Cnnm2	49.3045	NA	30.3259	18.9785	14.8061	NA	11.5395	35.2761	3	NA	2	1	0.900901	NA	0.761035	1.85874
Cnnm3	50.9155	NA	44.8313	6.08416	9.6376	NA	21.0772	1.94943	11	NA	8	3	2.08215	NA	3.76117	0.96123
Cnnm4	24.4024	NA	20.3114	4.09103	5.32571	NA	8.77003	1.88527	7	NA	5	2	1.52772	NA	2.15889	0.921659
Cnot1	20.9245	2.9491	16.8331	1.14238	2.49845	9.73299	2.36552	1.19495	24	3	20	1	2.86567	9.90099	2.81057	1.04603
Cnot10	5.75396	NA	3.76406	1.9899	1.92892	NA	1.68414	4.07766	7	NA	6	1	2.34663	NA	2.68456	2.04918
Cnot11	20.8995	NA	13.876	7.02348	6.60123	NA	9.14099	4.3597	9	NA	6	3	2.8427	NA	3.95257	1.8622
Cnot2	33.9363	NA	9.73173	24.2046	9.74341	NA	5.67448	14.9966	29	NA	11	18	8.32616	NA	6.41399	11.1524
Cnot3	17.9114	1.09836	5.98723	10.8258	6.16572	3.001	2.65391	38.2538	9	2	6	1	3.09811	5.46448	2.65957	3.53357
Cnot4	66.6246	3.38499	44.4481	18.7915	9.26887	10.3201	19.8164	4.07007	20	1	16	3	2.78242	3.04878	7.1333	0.649773
Cnot6	52.0586	5.40916	15.0847	31.5648	9.06787	14.5799	9.01116	8.54026	48	2	16	30	8.36091	5.39084	9.55795	8.11688
Cnot6l	38.9395	1.59932	16.3468	20.9933	4.41791	2.68793	11.9146	3.06606	37	3	14	20	4.19787	5.04202	10.2041	2.92099
Cnot7	15.3847	1.20953	3.99155	10.1837	5.57216	2.66416	4.65216	7.02806	13	2	4	7	4.70844	4.40529	4.662	4.83092
Cnot8	13.0266	1.81781	0.426225	10.7825	6.40126	12.1187	0.484898	10.7182	8	1	1	6	3.9312	6.66667	1.13766	5.96421
Cnppd1	27.2364	11.8988	2.83139	12.5061	9.94754	36.0571	2.31323	10.5626	9	2	4	3	3.28707	6.06061	3.26797	2.53378
Cnpy2	9.03782	0.397993	1.46456	7.17526	8.88674	1.16372	2.66768	56.9465	6	1	3	2	5.89971	2.92398	5.46448	15.873
Cnpy3	40.8195	NA	1.51198	39.3076	21.5066	NA	1.81947	40.1918	14	NA	1	13	7.37619	NA	1.20337	13.2924
Cnpy4	7.25154	NA	2.36506	4.88648	4.07161	NA	3.20469	4.92093	5	NA	2	3	2.80741	NA	2.71003	3.02115
Cnr1	4.12871	NA	4.12871	NA	0.710988	NA	2.90345	NA	1	NA	1	NA	0.172206	NA	0.703235	NA
Cnst	95.0218	NA	56.9616	38.0602	20.9069	NA	26.6674	16.774	42	NA	24	18	9.24092	NA	11.236	7.93301
Cntd1	0.747828	NA	NA	0.747828	0.33565	NA	NA	0.667704	1	NA	NA	1	0.448833	NA	NA	0.892857
Cntfr	9.35317	NA	3.01343	6.33975	4.12579	NA	2.63873	8.06584	6	NA	3	3	2.64667	NA	2.62697	3.81679
Cntln	25.4602	NA	24.1447	1.31556	3.66387	NA	5.61634	0.52749	3	NA	2	1	0.431717	NA	0.465224	0.400962
Cntnap1	18.6318	NA	6.91591	11.7159	3.47609	NA	1.66328	11.0423	6	NA	3	3	1.1194	NA	0.721501	2.82752
Cntrl	24.8587	NA	15.7323	9.12632	3.08726	NA	2.23249	14.0405	15	NA	9	6	1.86289	NA	1.27714	9.23077
Cntrob	21.2956	19.4371	1.85845	NA	5.39129	21.336	0.697616	NA	8	6	2	NA	2.02532	6.58617	0.750751	NA
Coa3	25.3716	NA	1.09579	24.2758	35.3365	NA	3.35103	65.6103	11	NA	5	6	15.3203	NA	15.2905	16.2162
Coa4	9.72551	NA	NA	9.72551	11.6613	NA	NA	20.8255	2	NA	NA	2	2.39808	NA	NA	4.28266
Coa5	12.1971	NA	NA	12.1971	3.15823	NA	NA	3.48389	7	NA	NA	7	1.81253	NA	NA	1.99943
Coa6	13.227	NA	2.06722	11.1598	17.3356	NA	8.61341	33.1152	5	NA	1	4	6.55308	NA	4.16667	11.8694
Coa7	43.7171	NA	19.0231	24.694	15.2007	NA	27.332	11.5016	5	NA	3	2	1.73853	NA	4.31034	0.931532
Coasy	34.4109	11.5043	21.8715	1.03515	14.422	29.8812	12.9264	3.35	7	2	4	1	2.93378	5.19481	2.36407	3.23625
Cobl	28.9855	NA	25.3582	3.62737	5.06033	NA	6.28611	2.65547	7	NA	6	1	1.22207	NA	1.48736	0.732064
Cobll1	78.1649	NA	77.0472	1.11767	15.4935	NA	20.6783	0.987339	9	NA	8	1	1.78394	NA	2.14707	0.883392
Cog1	45.1482	NA	28.6065	16.5417	14.9053	NA	9.72018	306.327	16	NA	11	5	5.28227	NA	3.73768	92.5926
Cog2	10.6592	NA	2.38404	8.27513	3.77449	NA	1.08563	16.0682	6	NA	4	2	2.12465	NA	1.82149	3.8835
Cog3	37.5536	NA	1.69905	35.8545	8.89474	NA	0.683174	21.342	15	NA	2	13	3.55282	NA	0.804182	7.7381
Cog4	10.4885	NA	NA	10.4885	3.80844	NA	NA	28.424	5	NA	NA	5	1.81554	NA	NA	13.5501
Cog5	24.266	4.20984	12.2685	7.78767	8.09678	200.468	4.92713	16.024	19	1	7	11	6.33967	47.619	2.81124	22.6337
Cog6	1.30499	NA	0.904091	0.400894	0.446913	NA	0.458	0.435281	2	NA	1	1	0.684932	NA	0.506586	1.08578
Cog7	7.41255	NA	0.398683	7.01386	2.57023	NA	0.172366	15.1487	3	NA	2	1	1.04022	NA	0.864678	2.15983
Cog8	69.7275	NA	66.927	2.80055	33.1405	NA	34.8034	28.2883	20	NA	18	2	9.5057	NA	9.36037	20.202
Coil	24.7047	NA	21.9109	2.79384	9.4763	NA	12.7241	3.20762	4	NA	3	1	1.53433	NA	1.74216	1.14811
Col12a1	76.2965	0.860244	53.4088	22.0274	6.51049	2.53759	5.80657	10.095	97	1	65	31	8.27716	2.94985	7.06675	14.2071
Col16a1	15.1275	NA	4.9505	10.177	2.90579	NA	1.04375	55.011	9	NA	6	3	1.72877	NA	1.26502	16.2162
Col17a1	68.6277	4.08643	51.7777	12.7636	12.3899	16.9562	11.733	14.4221	183	6	142	35	33.0385	24.8963	32.1777	39.548
Col18a1	72.3106	NA	49.3362	22.9744	12.4867	NA	10.5735	22.6349	65	NA	47	18	11.2243	NA	10.0729	17.734
Col1a2	20.5645	NA	5.7552	14.8093	3.99854	NA	1.39723	16.8096	10	NA	5	5	1.94439	NA	1.21389	5.67537
Col27a1	50.608	NA	45.502	5.10603	6.6293	NA	8.21633	3.03569	21	NA	17	4	2.75085	NA	3.0697	2.37812
Col3a1	4.59316	NA	4.59316	NA	0.825514	NA	1.04509	NA	1	NA	1	NA	0.179727	NA	0.227531	NA
Col4a1	35.0452	0.556988	12.7131	21.7751	5.29784	2.45369	2.53755	15.802	48	1	20	27	7.25624	4.40529	3.99202	19.5936
Col4a2	16.5839	1.29414	6.86542	8.42436	2.58075	3.90979	1.33986	8.67596	24	1	9	14	3.73483	3.02115	1.75644	14.4181
Col4a3bp	18.896	0.953359	4.78587	13.1567	3.5234	2.22228	2.55247	4.301	14	1	4	9	2.61048	2.331	2.13333	2.94214
Col4a5	29.1499	1.76075	3.02936	24.3597	4.49081	5.572	0.598214	21.926	15	1	6	8	2.31089	3.16456	1.18483	7.20072
Col4a6	50.129	9.32778	19.4408	21.3605	7.54046	36.2948	3.82994	16.2437	27	1	14	12	4.06137	3.89105	2.75808	9.12548
Col5a1	47.8573	NA	2.53706	45.3203	5.69594	NA	0.459862	18.1717	17	NA	4	13	2.02333	NA	0.725032	5.21251
Col5a2	33.4363	NA	6.53807	26.8982	5.05461	NA	1.45485	15.3441	22	NA	9	13	3.32577	NA	2.00267	7.41586
Col6a1	36.4	NA	22.0229	14.3771	9.15492	NA	7.15494	18.7445	10	NA	7	3	2.51509	NA	2.2742	3.91134
Col6a2	20.0419	NA	16.1267	3.9152	5.3746	NA	5.19377	8.56717	4	NA	3	1	1.07267	NA	0.966184	2.18818
Col7a1	43.1875	NA	37.3096	5.87795	4.69532	NA	4.22293	16.1927	77	NA	70	7	8.37139	NA	7.92303	19.2837
Col8a1	61.1857	NA	54.5201	6.66555	11.9737	NA	24.3938	2.51057	13	NA	11	2	2.54403	NA	4.9217	0.753296
Commd1	88.5421	30.5328	21.3388	36.6706	108.242	1052.86	37.6345	165.183	21	6	6	9	25.6724	206.897	10.582	40.5405
Commd10	7.75066	NA	NA	7.75066	5.00366	NA	NA	8.35201	1	NA	NA	1	0.645578	NA	NA	1.07759
Commd2	22.728	NA	2.89811	19.8299	7.6758	NA	4.83018	8.5107	7	NA	3	4	2.36407	NA	5	1.71674
Commd3	9.10424	NA	4.35763	4.74661	10.334	NA	7.41093	16.3676	8	NA	4	4	9.08059	NA	6.80272	13.7931
Commd5	38.767	NA	11.1323	27.6346	38.8447	NA	16.4923	126.764	6	NA	3	3	6.01202	NA	4.44444	13.7615
Commd6	13.0001	2.61907	NA	10.3811	14.8573	74.8305	NA	18.0227	7	1	1	5	8	28.5714	3.78788	8.68056
Commd7	7.20831	NA	0.532733	6.67558	2.19231	NA	1.36598	2.66384	6	NA	1	5	1.82482	NA	2.5641	1.99521
Commd8	22.371	NA	1.47344	20.8976	6.45814	NA	2.66927	7.27378	10	NA	1	9	2.88684	NA	1.81159	3.13261
Commd9	3.10389	NA	1.59987	1.50402	2.64161	NA	2.67985	2.63401	2	NA	1	1	1.70213	NA	1.67504	1.75131
Comt	8.61363	NA	0.60341	8.01022	3.58901	NA	0.756153	8.38766	7	NA	1	6	2.91667	NA	1.25313	6.28272
Copa	12.6477	NA	8.68404	3.96367	2.73228	NA	2.363	6.9174	17	NA	13	4	3.6725	NA	3.53741	6.9808
Copb1	8.71707	NA	6.39432	2.32275	2.62958	NA	2.23421	7.28135	13	NA	11	2	3.92157	NA	3.84347	6.26959
Copb2	10.6936	NA	5.04936	5.64427	3.51417	NA	1.85775	24.0182	13	NA	8	5	4.2721	NA	2.94334	21.2766
Cope	1.60511	NA	1.03045	0.574659	1.55383	NA	1.1116	6.84118	3	NA	2	1	2.90416	NA	2.1575	11.9048
Copg1	4.83836	NA	2.72127	2.11709	1.07447	NA	1.01997	1.21742	9	NA	6	3	1.99867	NA	2.24888	1.72513
Copg2	10.4234	NA	6.42881	3.99461	2.59547	NA	2.4575	3.0657	11	NA	8	3	2.73904	NA	3.0581	2.30238
Cops2	31.1094	2.05402	5.37236	23.6831	9.24775	4.00393	5.5962	12.5241	29	2	10	17	8.62069	3.89864	10.4167	8.98995
Cops3	2.1267	NA	2.1267	NA	1.35804	NA	1.67193	NA	4	NA	4	NA	2.55428	NA	3.14465	NA
Cops4	7.8951	NA	0.467502	7.4276	4.5012	NA	0.382884	20.3496	8	NA	1	7	4.561	NA	0.819001	19.1781
Cops5	9.23801	NA	8.57864	0.659369	5.3368	NA	8.53596	1.73976	11	NA	10	1	6.35471	NA	9.95025	2.63852
Cops6	6.88335	NA	5.11128	1.77208	6.29191	NA	5.24234	16.4081	8	NA	7	1	7.31261	NA	7.17949	9.25926
Cops7a	4.10775	NA	1.27889	2.82886	1.81357	NA	1.46326	2.55543	4	NA	3	1	1.766	NA	3.43249	0.903342
Cops7b	7.587	NA	NA	7.587	3.40072	NA	NA	5.90888	3	NA	NA	3	1.34469	NA	NA	2.33645
Cops8	44.0277	NA	2.03996	41.9877	23.8892	NA	3.23803	38.5917	21	NA	2	19	11.3945	NA	3.1746	17.4632
Copz1	9.06832	1.88465	0.686572	6.4971	5.44971	314.108	1.28572	5.78034	10	NA	1	9	6.00962	NA	1.87266	8.00712
Coq10a	1.88004	NA	1.88004	NA	0.749916	NA	2.41031	NA	1	NA	1	NA	0.398883	NA	1.28205	NA
Coq10b	10.8118	NA	2.45892	8.35284	6.23875	NA	3.37301	9.29125	4	NA	2	2	2.30814	NA	2.74348	2.22469
Coq2	7.55145	NA	NA	7.55145	4.41089	NA	NA	13.2018	6	NA	NA	6	3.50467	NA	NA	10.4895
Coq3	6.56392	NA	2.9213	3.64262	2.51203	NA	2.62471	2.44964	3	NA	1	2	1.14811	NA	0.898473	1.34499
Coq4	8.31083	NA	NA	8.31083	4.1826	NA	NA	7.13989	3	NA	NA	3	1.50981	NA	NA	2.57732
Coq5	10.2674	NA	NA	10.2674	5.13111	NA	NA	10.2061	2	NA	NA	2	0.9995	NA	NA	1.98807
Coq9	12.5132	NA	1.6825	10.8307	7.39115	NA	1.7861	14.5184	4	NA	1	3	2.36267	NA	1.06157	4.02145
Coro1b	11.0506	NA	5.90073	5.14988	5.99274	NA	4.05548	16.4533	14	NA	7	7	7.59219	NA	4.811	22.3642
Coro1c	41.9818	NA	4.30331	37.6785	12.2182	NA	3.01987	19.7269	29	NA	6	23	8.44005	NA	4.21053	12.0419
Coro2a	9.5582	NA	NA	9.5582	2.2623	NA	NA	4.34661	5	NA	1	4	1.18343	NA	0.612745	1.81901
Coro7	66.0731	NA	50.4251	15.6479	18.943	NA	18.2106	25.6524	19	NA	14	5	5.44725	NA	5.05598	8.19672
Cotl1	8.78694	NA	1.30102	7.48591	5.36116	NA	3.03269	7.26083	12	NA	2	10	7.32154	NA	4.662	9.69932
Cox10	15.3576	NA	5.77704	9.58057	5.25765	NA	4.33711	6.40841	7	NA	2	5	2.39644	NA	1.5015	3.34448
Cox11	17.8735	NA	13.7265	4.14704	7.91215	NA	16.5779	2.9102	6	NA	1	5	2.65604	NA	1.20773	3.50877
Cox14	4.66814	NA	0.951259	3.71688	6.45662	NA	5.467	11.9899	3	NA	1	2	4.14938	NA	5.74713	6.45161
Cox15	31.0637	NA	NA	31.0637	6.47431	NA	NA	8.95983	5	NA	NA	5	1.0421	NA	NA	1.44217
Cox16	1.1134	NA	NA	1.1134	0.557536	NA	NA	0.727237	2	NA	2	NA	1.0015	NA	6.23053	NA
Cox19	30.5302	NA	2.28869	28.2416	40.1186	NA	8.20319	60.2165	14	NA	2	12	18.3968	NA	7.16846	25.5864
Cox4i1	3.15274	NA	3.15274	NA	4.64321	NA	6.18185	NA	9	NA	9	NA	13.2548	NA	17.6471	NA
Cox5a	3.08382	0.858713	1.4319	0.793204	4.45639	8.94492	3.24695	5.11744	4	1	2	1	5.78035	10.4167	4.53515	6.45161
Cox5b	0.938563	NA	0.938563	NA	1.64949	NA	2.40657	NA	1	NA	1	NA	1.75747	NA	2.5641	NA
Cox6a1	2.24246	NA	1.18307	1.05939	4.20724	NA	3.48989	5.60523	5	NA	2	3	9.38086	NA	5.89971	15.873
Cox6b1	2.84809	1.23895	1.60914	NA	5.63977	11.3665	6.16528	NA	3	1	2	NA	5.94059	9.17431	7.66284	NA
Cox6b2	0.963367	NA	0.963367	NA	1.58971	NA	4.18855	NA	1	NA	1	NA	1.65017	NA	4.34783	NA
Cox6c	0.503102	NA	NA	0.503102	1.0002	NA	NA	3.67227	1	NA	NA	1	1.98807	NA	NA	7.29927
Cox7a2	1.27814	NA	0.830401	0.447739	1.69515	NA	3.29524	1.4632	3	NA	2	1	3.97878	NA	7.93651	3.26797
Cox7a2l	11.908	0.559068	2.51159	8.83733	10.3638	9.6391	6.20145	12.8824	10	1	3	6	8.70322	17.2414	7.40741	8.74636
Cox7b	1.66573	NA	0.652891	1.01284	1.66407	NA	2.68679	1.61538	2	NA	1	1	1.998	NA	4.11523	1.5949
Cox8a	2.79834	1.45401	0.482835	0.861501	5.13457	13.9808	2.29922	3.72944	4	1	1	2	7.33945	9.61538	4.7619	8.65801
Cp	10.8285	NA	NA	10.8285	1.72841	NA	NA	3.92763	5	NA	NA	5	0.798085	NA	NA	1.81357
Cpa4	6.05319	NA	6.05319	NA	2.93701	NA	4.7927	NA	1	NA	1	NA	0.485201	NA	0.791766	NA
Cpd	110.636	NA	20.6682	89.9676	12.0887	NA	4.99955	18.0803	62	NA	17	45	6.77448	NA	4.11224	9.04341
Cpeb2	23.8541	NA	10.364	13.4901	3.48388	NA	3.37701	3.57069	14	NA	5	9	2.04469	NA	1.6292	2.38221
Cpeb4	36.3403	21.3508	7.17233	7.81718	4.75596	15.8389	3.27503	1.90523	8	3	3	2	1.04698	2.22552	1.36986	0.487448
Cped1	12.9187	NA	NA	12.9187	2.63754	NA	NA	14.1033	2	NA	NA	2	0.40833	NA	NA	2.18341
Cplx2	9.41492	NA	NA	9.41492	1.91049	NA	NA	2.23738	4	NA	NA	4	0.811688	NA	NA	0.95057
Cpm	25.996	NA	NA	25.996	5.00404	NA	NA	6.78393	4	NA	NA	4	0.769971	NA	NA	1.04384
Cpne1	137.434	NA	127.584	9.84931	39.0437	NA	79.1958	5.86268	53	NA	45	8	15.0568	NA	27.933	4.7619
Cpne2	3.50009	NA	0.621069	2.87902	1.52046	NA	0.377091	6.38365	3	NA	1	2	1.30321	NA	0.607165	4.43459
Cpne3	9.08566	NA	0.741181	8.34448	1.60922	NA	0.46266	2.1222	7	NA	1	6	1.23982	NA	0.62422	1.52594
Cpne8	14.2961	NA	NA	14.2961	3.84822	NA	NA	7.91153	4	NA	NA	4	1.07672	NA	NA	2.21361
Cpox	9.07278	NA	2.72223	6.35054	2.84949	NA	2.04372	3.89126	9	NA	3	6	2.82663	NA	2.25225	3.67647
Cpped1	76.422	NA	1.56616	74.8558	28.6977	NA	1.66791	45.7554	18	NA	3	15	6.75929	NA	3.19489	9.1687
Cpsf1	3.69734	NA	3.69734	NA	0.818719	NA	0.854678	NA	7	NA	7	NA	1.55004	NA	1.61812	NA
Cpsf2	26.3211	NA	8.92004	17.4011	4.95223	NA	3.79738	6.27744	14	NA	6	8	2.63405	NA	2.55428	2.886
Cpsf3	4.50809	NA	4.50809	NA	1.76097	NA	2.19372	NA	8	NA	8	NA	3.125	NA	3.89294	NA
Cpsf3l	2.9741	NA	1.68645	1.28765	1.26719	NA	0.93536	3.08049	5	NA	4	1	2.13038	NA	2.21852	2.39234
Cpsf4	12.6066	NA	1.20445	11.4021	7.3465	NA	1.63871	13.6226	8	NA	2	6	4.662	NA	2.72109	7.16846
Cpsf4l	23.1289	NA	NA	23.1289	14.685	NA	NA	46.6307	3	NA	NA	3	1.90476	NA	NA	6.04839
Cpsf6	27.0665	NA	8.9731	18.0934	4.14241	NA	5.41854	3.76711	27	NA	11	16	4.13223	NA	6.64251	3.33125
Cpsf7	43.0698	NA	8.41868	34.6511	11.9505	NA	5.9454	16.9112	32	NA	10	22	8.87902	NA	7.06215	10.7369
Cpt1a	54.9928	NA	6.42873	48.5641	12.7861	NA	2.76862	25.6681	13	NA	2	11	3.02255	NA	0.861326	5.81395
Cpt2	25.8687	NA	22.9778	2.89086	11.008	NA	11.6226	11.5634	8	NA	8	NA	3.40426	NA	4.04654	NA
Cpxm1	8.11248	NA	NA	8.11248	3.35088	NA	NA	62.8874	2	NA	1	1	0.826105	NA	0.461042	7.75194
Cpxm2	27.5015	NA	11.1959	16.3057	7.84414	NA	4.87837	15.056	17	NA	9	8	4.84883	NA	3.92157	7.38689
[truncated: 8,125 more rows]
