# Supplementary material for: m6A RNA methylation impacts fate choices during skin morphogenesis
Source: eLife. 2020 Aug 26;9:e56980. doi: 10.7554/eLife.56980 (PMC7535931; doi:10.7554/eLife.56980)
Supplement: Supplementary file 5. — The gene sets with p values <0.05 are shown. [file elife-56980-supp5.xlsx]

## Sheet: Epi Basal
GO terms enriched	p value	Genes enriched
GO_DNA_BINDING_TRANSCRIPTION_FACTOR_ACTIVITY	5.24e-06	Zbtb33;Cited2;Cebpg;Rai1;Zbtb6;Foxn3;Toe1;Tshz2;Zfpm1;Tet3;Zbtb7c;Zbtb12;Adnp2;Zhx2;Zbtb1;Hic2;Fosl2;Lcorl;Arhgap35;Hoxa1;Hoxa2;Hoxb8;Foxn2;Irf2bp2;Jund;Smad7;Myc;Nfe2l2;Nfix;Zbtb21;Pcbp1;Zbtb7b;Klf3;Zbtb7a;Bcl11a;Pou3f1;Zfp64;Ash1l;Arid1b;Rlf;Sox9;Zfp36l1;Tcf20;Tfap2a;Tgif1;Zbtb25;Prdm2;Zmym1;Kmt2d;Arid1a;Thap2;Cggbp1;Bhlhe40;Thap3;Tceal1;Zbtb24
GO_RNA_METHYLATION	7.6e-06	Mettl6;Bcdin3d;Trmt10c;Cmtr2;Mepce;Trmt5;Rbm15;Cbll1;Fdxacb1;Wtap;Lcmt2
GO_RNA_METABOLIC_PROCESS	8.27e-06	Hipk3;Pop7;Cebpg;Rpp38;Clp1;Snrnp35;Eri2;Adat3;Toe1;Mettl6;Bcdin3d;Cstf1;Srfbp1;Pde12;Fen1;Scaf8;Zbtb1;Sephs2;Setx;Rprd2;Pars2;Aar2;Mocs3;Pcbp1;Dbr1;Zbtb7a;Cdk12;Polr2l;Tex10;Trmt10c;Shq1;Imp3;Thumpd1;Cmtr2;Mepce;Utp3;Ddx24;Trmt5;Phrf1;Scaf1;Rbm15;Mrpl44;Son;Zfp36l1;Snip1;Gemin7;Cbll1;Ints5;Rbm4b;Ppp1r9b;Lsm10;Exo1;Fdxacb1;Wtap;Lcmt2
GO_RNA_MODIFICATION	2.43e-05	Adat3;Mettl6;Bcdin3d;Sephs2;Mocs3;Trmt10c;Thumpd1;Cmtr2;Mepce;Trmt5;Rbm15;Cbll1;Fdxacb1;Wtap;Lcmt2
GO_REGULATION_OF_UBIQUITIN_PROTEIN_TRANSFERASE_ACTIVITY	0.000116249	Fem1b;Topors;Dcun1d3;Fbxo5;Smad7;Pten;Bag5;Bag2
GO_MACROMOLECULE_METHYLATION	0.00014513	Mettl6;Bcdin3d;Tet3;Setd1b;Auts2;Myc;Trmt10c;Cmtr2;Ash1l;Mepce;Trmt5;Rlf;Rbm15;Prdm2;Cbll1;Kmt2d;Fdxacb1;Wtap;Lcmt2;Setdb1
GO_PROTEIN_MODIFICATION_BY_SMALL_PROTEIN_CONJUGATION_OR_REMOVAL	0.000164137	Tank;Fem1b;Trim13;Topors;Rraga;Cish;Lrr1;Socs4;Dcun1d3;Asb8;Commd1;Sde2;Kctd6;Otud1;Rwdd3;Fbxl5;Fbxo5;Mocs3;Trim59;Apc;Birc3;Hspa5;Med11;Smad7;Myc;Nfe2l2;Cnot4;Pex13;Bcl11a;Klhl9;Fem1c;Peli1;Pten;Cbx8;Klhl42;Rnf25;Usp1;Phf23;Cbll1;Vcpip1;Spsb1;Rnf146;Fbxo30;Znrf3;Usp38;Spsb2;Usp10;Socs6;Bag5;Bag2;Socs5;Keap1
GO_ENDORIBONUCLEASE_ACTIVITY_PRODUCING_5_PHOSPHOMONOESTERS	0.000168338	Pop7;Rpp38;Fen1;Dbr1;Mrpl44;Exo1
GO_PROTEIN_MODIFICATION_BY_SMALL_PROTEIN_CONJUGATION	0.000180719	Fem1b;Trim13;Topors;Rraga;Cish;Lrr1;Socs4;Dcun1d3;Asb8;Commd1;Sde2;Kctd6;Rwdd3;Fbxl5;Fbxo5;Mocs3;Trim59;Birc3;Hspa5;Med11;Smad7;Nfe2l2;Cnot4;Pex13;Bcl11a;Klhl9;Fem1c;Peli1;Pten;Cbx8;Klhl42;Rnf25;Phf23;Cbll1;Vcpip1;Spsb1;Rnf146;Fbxo30;Znrf3;Spsb2;Socs6;Bag5;Bag2;Socs5;Keap1
GO_RNA_METHYLTRANSFERASE_ACTIVITY	0.000310351	Mettl6;Bcdin3d;Trmt10c;Cmtr2;Mepce;Trmt5;Fdxacb1;Lcmt2
GO_METHYLATION	0.000355827	Mettl6;Bcdin3d;Tet3;Setd1b;Auts2;Myc;Trmt10c;Cmtr2;Ash1l;Mepce;Trmt5;Rlf;Rbm15;Prdm2;Cbll1;Kmt2d;Fdxacb1;Mettl18;Wtap;Lcmt2;Setdb1
GO_TRNA_PROCESSING	0.000400058	Pop7;Rpp38;Clp1;Adat3;Mettl6;Bcdin3d;Sephs2;Mocs3;Trmt10c;Thumpd1;Trmt5;Lcmt2
GO_DERMATAN_SULFATE_BIOSYNTHETIC_PROCESS	0.000412299	Vcan;Cspg4;Dse;Dsel
GO_POST_TRANSLATIONAL_PROTEIN_MODIFICATION	0.000412683	Fem1b;Ckap4;Prss23;Cish;Lrr1;Dcun1d3;Asb8;Vcan;Commd1;Kctd6;Rab38;Fbxl5;Klhl9;Fem1c;Klhl42;Spsb1;Fbxo30;Spsb2;Socs6;Socs5;Keap1;Lcmt2
GO_MRNA_METHYLATION	0.000660529	Trmt10c;Cmtr2;Cbll1;Wtap
GO_S_ADENOSYLMETHIONINE_DEPENDENT_METHYLTRANSFERASE_ACTIVITY	0.000666924	Mettl6;Setd1b;Trmt10c;Cmtr2;Ash1l;Mepce;Trmt5;Prdm2;Kmt2d;Fdxacb1;Lcmt2;Setdb1
GO_TERMINATION_OF_RNA_POLYMERASE_II_TRANSCRIPTION	0.000734544	Clp1;Cstf1;Scaf8;Setx;Med18;Lsm10
GO_TRNA_MODIFICATION	0.000871308	Adat3;Mettl6;Bcdin3d;Sephs2;Mocs3;Trmt10c;Thumpd1;Trmt5;Lcmt2
GO_CHONDROITIN_SULFATE_PROTEOGLYCAN_METABOLIC_PROCESS	0.000932985	Vcan;Cspg4;Dse;Impad1;Chpf;Dsel
GO_NEGATIVE_REGULATION_OF_UBIQUITIN_PROTEIN_TRANSFERASE_ACTIVITY	0.000940889	Fbxo5;Smad7;Bag5;Bag2
GO_DERMATAN_SULFATE_PROTEOGLYCAN_BIOSYNTHETIC_PROCESS	0.00112072	Vcan;Cspg4;Dse;Dsel
GO_ENDONUCLEASE_ACTIVITY_ACTIVE_WITH_EITHER_RIBO_OR_DEOXYRIBONUCLEIC_ACIDS_AND_PRODUCING_5_PHOSPHOMONOESTERS	0.00121698	Pop7;Rpp38;Fen1;Dbr1;Mrpl44;Exo1
GO_POSITIVE_REGULATION_OF_PROTEIN_MODIFICATION_BY_SMALL_PROTEIN_CONJUGATION_OR_REMOVAL	0.00123771	Tank;Topors;Dcun1d3;Commd1;Rwdd3;Birc3;Hspa5;Smad7;Peli1;Pten;Phf23
GO_TRANSFERASE_ACTIVITY_TRANSFERRING_ONE_CARBON_GROUPS	0.00126896	Mettl6;Bcdin3d;Setd1b;Trmt10c;Cmtr2;Ash1l;Mepce;Trmt5;Prdm2;Kmt2d;Fdxacb1;Mettl18;Lcmt2;Setdb1
GO_NCRNA_PROCESSING	0.00154292	Pop7;Rpp38;Clp1;Adat3;Toe1;Mettl6;Bcdin3d;Srfbp1;Sephs2;Mocs3;Tex10;Trmt10c;Shq1;Imp3;Thumpd1;Utp3;Trmt5;Mrpl44;Ints5;Fdxacb1;Lcmt2
GO_REGULATION_OF_PROTEIN_MODIFICATION_BY_SMALL_PROTEIN_CONJUGATION_OR_REMOVAL	0.00182699	Tank;Fem1b;Topors;Dcun1d3;Commd1;Rwdd3;Fbxo5;Birc3;Hspa5;Smad7;Peli1;Pten;Phf23;Bag5;Bag2
GO_NEGATIVE_REGULATION_OF_HEMOPOIESIS	0.00205142	N4bp2l2;Zfpm1;Hoxb8;Smad7;Myc;Nfe2l2;Zbtb7b;Rbm15;Zfp36l1;Socs5
GO_N6_METHYLADENOSINE_CONTAINING_RNA_BINDING	0.00209393	Ythdf3;Ythdf2;Ythdf1
GO_REGULATION_OF_PROTEIN_FOLDING	0.00234306	Hspa5;Pdcl;Bag5
GO_O_METHYLTRANSFERASE_ACTIVITY	0.00240699	Bcdin3d;Cmtr2;Mepce;Lcmt2
GO_MRNA_EDITING_COMPLEX	0.00243694	Rbm15;Cbll1;Wtap
GO_TRNA_METHYLTRANSFERASE_ACTIVITY	0.00246783	Mettl6;Bcdin3d;Trmt10c;Trmt5;Lcmt2
GO_TRNA_METABOLIC_PROCESS	0.00265969	Pop7;Rpp38;Clp1;Adat3;Mettl6;Bcdin3d;Sephs2;Pars2;Mocs3;Trmt10c;Thumpd1;Trmt5;Lcmt2
GO_CATALYTIC_ACTIVITY_ACTING_ON_RNA	0.00283142	Pop7;Rpp38;Eri2;Toe1;Mettl6;Bcdin3d;Pde12;Fen1;Pars2;Dbr1;Polr2l;Trmt10c;Cmtr2;Mepce;Ddx24;Trmt5;Mrpl44;Exo1;Fdxacb1;Lcmt2
GO_RIBONUCLEASE_ACTIVITY	0.00292852	Pop7;Rpp38;Eri2;Toe1;Pde12;Fen1;Dbr1;Mrpl44;Exo1
GO_MITOCHONDRIAL_TRNA_METHYLATION	0.0029709	Trmt10c;Trmt5
GO_MRNA_MODIFICATION	0.00314036	Trmt10c;Cmtr2;Cbll1;Wtap
GO_RESPONSE_TO_FLUID_SHEAR_STRESS	0.00324898	Cited2;Smad7;Nfe2l2;Mapk7;Socs5
GO_PROTEOGLYCAN_BIOSYNTHETIC_PROCESS	0.00371192	Vcan;Cspg4;Dse;Chpf;Dsel;Hs6st1;Fam20b
GO_NCRNA_METABOLIC_PROCESS	0.00390274	Pop7;Rpp38;Clp1;Adat3;Toe1;Mettl6;Bcdin3d;Srfbp1;Sephs2;Pars2;Mocs3;Tex10;Trmt10c;Shq1;Imp3;Thumpd1;Mepce;Utp3;Trmt5;Mrpl44;Ints5;Fdxacb1;Lcmt2
GO_NEGATIVE_REGULATION_OF_TRANSFERASE_ACTIVITY	0.00406695	Hipk3;Spry2;Dusp14;Socs4;Dusp6;Fbxo5;Apc;Smad7;Nck1;Pten;Ywhag;Dusp16;Hyal2;Bag5;Bag2;Socs5
GO_POSITIVE_REGULATION_OF_HEMATOPOIETIC_STEM_CELL_PROLIFERATION	0.00430158	N4bp2l2;Atxn1l
GO_TRNA_METHYLATION	0.0043505	Mettl6;Bcdin3d;Trmt10c;Trmt5;Lcmt2
GO_CRANIAL_NERVE_FORMATION	0.00455018	Hoxa1;Tfap2a
GO_MRNA_METABOLIC_PROCESS	0.00492326	Hipk3;Cebpg;Clp1;Snrnp35;Cstf1;Pde12;Scaf8;Zbtb1;Setx;Rprd2;Aar2;Pcbp1;Dbr1;Zbtb7a;Cdk12;Polr2l;Cmtr2;Phrf1;Scaf1;Rbm15;Son;Zfp36l1;Gemin7;Rbm4b;Lsm10;Wtap
GO_NEGATIVE_REGULATION_OF_T_HELPER_CELL_DIFFERENTIATION	0.0049809	Smad7;Zbtb7b;Socs5
GO_RIBONUCLEASE_P_COMPLEX	0.00524997	Pop7;Rpp38;Trmt10c
GO_ENDORIBONUCLEASE_ACTIVITY	0.00549288	Pop7;Rpp38;Fen1;Dbr1;Mrpl44;Exo1
GO_POSITIVE_REGULATION_OF_INTERFERON_GAMMA_BIOSYNTHETIC_PROCESS	0.00583304	Cebpg;Zfpm1
GO_1_PHOSPHATIDYLINOSITOL_3_KINASE_REGULATOR_ACTIVITY	0.00599671	Cish;Socs6;Socs5
GO_PROTEOGLYCAN_METABOLIC_PROCESS	0.00604418	Vcan;Cspg4;Dse;Impad1;Chpf;Dsel;Hs6st1
GO_NEGATIVE_REGULATION_OF_TRANSCRIPTION_FROM_RNA_POLYMERASE_II_PROMOTER_IN_RESPONSE_TO_STRESS	0.00605946	Cited2;Dnajb1;Nck1
GO_POSITIVE_REGULATION_OF_TRANSCRIPTION_FROM_RNA_POLYMERASE_II_PROMOTER_IN_RESPONSE_TO_STRESS	0.00613043	Hspa5;Nfe2l2;Mbtps2;Mapk7
GO_PROTEIN_TYROSINE_KINASE_BINDING	0.00673595	Crk;Nck1;Nedd9;Pten;Ywhag;Hyal2;Socs5
GO_POSTTRANSLATIONAL_PROTEIN_TARGETING_TO_MEMBRANE_TRANSLOCATION	0.00687859	Hspa5;Sec62
GO_REGULATION_OF_HEMATOPOIETIC_STEM_CELL_PROLIFERATION	0.00689166	N4bp2l2;Atxn1l
GO_RESPONSE_TO_RADIATION	0.00690766	Tank;Trim13;Dcun1d3;Sde2;Fen1;Zbtb1;Opn3;Hoxa1;Hspa5;Jund;Myc;Scara3;Fkbpl;Fignl1;Aen;Usp1;Rhno1;Rbm4b;Tnks1bp1;Bhlhe40;Hyal2
GO_DNA_TEMPLATED_TRANSCRIPTION_TERMINATION	0.00695828	Clp1;Cstf1;Scaf8;Setx;Polr2l;Med18;Lsm10
GO_NEGATIVE_REGULATION_OF_HEMATOPOIETIC_PROGENITOR_CELL_DIFFERENTIATION	0.00729792	N4bp2l2;Nfe2l2
GO_NEGATIVE_REGULATION_OF_PROTEIN_FOLDING	0.00750626	Pdcl;Bag5
GO_SPINDLE_ASSEMBLY_INVOLVED_IN_MEIOSIS	0.00766566	Aspm;Fbxo5
GO_NEGATIVE_REGULATION_OF_MAPK_CASCADE	0.00812073	Hipk3;Spry2;Dusp14;Dag1;Dusp6;Myc;Ash1l;Pten;Sema6a;Dusp16;Hyal2
GO_NEGATIVE_REGULATION_OF_TRANSCRIPTION_BY_RNA_POLYMERASE_II	0.00836898	Cited2;N4bp2l2;Dnajb4;Zfpm1;Zhx2;Zbtb1;Hic2;Kctd1;Arhgap35;Hoxa2;Hoxb8;Dnajb1;Atxn1l;Jund;Smad7;Myc;Nck1;Nfix;Zbtb7b;Klf3;Zbtb7a;Bcl11a;Mepce;Ptch1;Cbx8;Sox9;Tfap2a;Tgif1;Arid1a;Cbx2;Cggbp1;Bhlhe40;Tceal1;Zbtb24
GO_POSITIVE_REGULATION_OF_TRANSLATIONAL_INITIATION	0.00879758	Ythdf3;Nck1;Ythdf2;Ythdf1
GO_CHONDROITIN_SULFATE_BIOSYNTHETIC_PROCESS	0.0088116	Vcan;Cspg4;Dse;Chpf
GO_NEGATIVE_REGULATION_OF_INTRACELLULAR_SIGNAL_TRANSDUCTION	0.00917273	Tank;Hipk3;Spry2;Dusp14;Dag1;Dusp6;Phlda3;Sh3bp4;Trim59;Arhgap35;Myc;Nfe2l2;Ddit4;Ash1l;Mapk7;Pten;Sema6a;Fignl1;Dusp16;Dyrk3;Hyal2;Usp10;Bag5
GO_HISTONE_H3_K4_METHYLATION	0.00921202	Tet3;Setd1b;Auts2;Ash1l;Rlf;Kmt2d
GO_PROTEIN_BINDING_BRIDGING_INVOLVED_IN_SUBSTRATE_RECOGNITION_FOR_UBIQUITINATION	0.00927202	Spsb1;Spsb2
GO_CELLULAR_RESPONSE_TO_RETINOIC_ACID	0.00928042	Adnp2;Setx;Gjb3;Hoxa2;Sox9;Fzd7
GO_REGULATION_OF_CYTOPLASMIC_TRANSLATIONAL_INITIATION	0.00938312	Nck1;Ythdf2
GO_REGULATION_OF_MEGAKARYOCYTE_DIFFERENTIATION	0.00969716	Zfpm1;Tnrc6a;Cnot4;Tnrc6c;Rbm15;Kmt2d
GO_NEGATIVE_REGULATION_OF_OXIDATIVE_STRESS_INDUCED_INTRINSIC_APOPTOTIC_SIGNALING_PATHWAY	0.00975543	Nfe2l2;Mapk7;Bag5
GO_MELANOSOME_ASSEMBLY	0.00995581	Rab38;Hps4
GO_REGULATION_OF_RAC_PROTEIN_SIGNAL_TRANSDUCTION	0.00997272	Crk;Auts2;Arf6
GO_HISTONE_LYSINE_N_METHYLTRANSFERASE_ACTIVITY	0.0100955	Setd1b;Ash1l;Prdm2;Kmt2d;Setdb1
GO_CAP_INDEPENDENT_TRANSLATIONAL_INITIATION	0.0102907	Nck1;Ythdf2
GO_TRNA_5_END_PROCESSING	0.0103242	Pop7;Rpp38;Trmt10c
GO_NEGATIVE_REGULATION_OF_CD4_POSITIVE_ALPHA_BETA_T_CELL_DIFFERENTIATION	0.010518	Smad7;Zbtb7b;Socs5
GO_ER_NUCLEUS_SIGNALING_PATHWAY	0.0106973	Hspa5;Nck1;Nfe2l2;Zbtb7b;Mbtps2
GO_NEGATIVE_REGULATION_OF_CELL_DIVISION	0.0110266	Aspm;Myc;Ptch1
GO_ENDONUCLEASE_COMPLEX	0.0116239	Pop7;Rpp38;Clp1;Trmt10c
GO_MAP_KINASE_PHOSPHATASE_ACTIVITY	0.0116766	Dusp14;Dusp6;Dusp16
GO_PHOSPHATIDYLINOSITOL_3_KINASE_REGULATOR_ACTIVITY	0.0118165	Cish;Socs6;Socs5
GO_NEGATIVE_REGULATION_OF_GROWTH	0.0119975	Rai1;Ccdc85b;Dcun1d3;Sh3bp4;Sertad3;Ing1;Bcl11a;Ptch1;Pten;Sema6a;Osgin2;Ppp1r9b;Hyal2
GO_PHOSPHATIDYLINOSITOL_3_KINASE_COMPLEX	0.0126529	Cish;Nrbf2;Socs6;Socs5
GO_RESPONSE_TO_LAMINAR_FLUID_SHEAR_STRESS	0.0132527	Smad7;Nfe2l2;Mapk7
GO_CHONDROITIN_SULFATE_PROTEOGLYCAN_BIOSYNTHETIC_PROCESS	0.013322	Vcan;Cspg4;Dse;Chpf
GO_NUCLEAR_TRANSCRIBED_MRNA_POLY_A_TAIL_SHORTENING	0.0139138	Tnrc6a;Cnot4;Tnrc6c;Tnks1bp1
GO_TRANSFERASE_ACTIVITY_TRANSFERRING_SULFUR_CONTAINING_GROUPS	0.0143495	Mocs3;Tst;Tpst2;Dsel;Hs6st1
GO_RESPONSE_TO_RETINOIC_ACID	0.0145341	Adnp2;Setx;Gjb3;Hoxa2;Ptch1;Sox9;Fzd7
GO_RNA_PHOSPHODIESTER_BOND_HYDROLYSIS_ENDONUCLEOLYTIC	0.0146627	Pop7;Rpp38;Fen1;Dbr1;Mrpl44;Exo1
GO_RNA_DNA_HYBRID_RIBONUCLEASE_ACTIVITY	0.0147392	Fen1;Exo1
GO_NUCLEOLAR_RIBONUCLEASE_P_COMPLEX	0.0150827	Pop7;Rpp38
GO_POSITIVE_REGULATION_OF_GONAD_DEVELOPMENT	0.0152851	Cited2;Sox9
GO_CELLULAR_RESPONSE_TO_ABIOTIC_STIMULUS	0.0157784	Tank;Dag1;Sde2;Zbtb1;Opn3;Hspa5;Myc;Pten;Fignl1;Sox9;Zfp36l1;Rhno1;Tnks1bp1;Hyal2;Casp8ap2
GO_AMINOGLYCAN_METABOLIC_PROCESS	0.0159265	Vcan;Cspg4;Dse;Has3;B3gnt8;Impad1;Chpf;Dsel;Hs6st1
GO_REGULATION_OF_UBIQUITIN_PROTEIN_LIGASE_ACTIVITY	0.0159693	Fbxo5;Pten;Bag2
GO_NEGATIVE_REGULATION_OF_DNA_BINDING_TRANSCRIPTION_FACTOR_ACTIVITY	0.0160967	Cebpg;Commd1;Rwdd3;Smad7;Peli1;Ptch1;Bhlhe40;Lrrc14;Keap1
GO_REGULATION_OF_MALE_GONAD_DEVELOPMENT	0.0163359	Cited2;Sox9
GO_LYSINE_N_METHYLTRANSFERASE_ACTIVITY	0.0170102	Setd1b;Ash1l;Prdm2;Kmt2d;Setdb1
GO_NEGATIVE_REGULATION_OF_MYELINATION	0.0170417	Tnfrsf21;Pten
GO_NEGATIVE_REGULATION_OF_PROTEIN_SERINE_THREONINE_KINASE_ACTIVITY	0.0178441	Hipk3;Spry2;Dusp14;Dusp6;Apc;Pten;Ywhag;Dusp16;Hyal2
GO_POSITIVE_REGULATION_OF_GENE_EXPRESSION	0.0179463	Topors;Spry2;Cited2;Cebpg;Rai1;Spin1;Bcdin3d;Zfpm1;Tet3;Zbtb7c;Setx;Pprc1;Fosl2;Ythdf3;Auts2;Tnrc6a;Bcl9l;Sertad3;Sertad1;Has3;Hoxa1;Hoxa2;Hspa5;Irf2bp2;Ing1;Jund;Rhog;Smad7;Myc;Nck1;Nfe2l2;Nfix;Pcbp1;Zbtb7b;Mbtps2;Ythdf2;Cdk12;Bcl11a;Polr2l;Pou3f1;Ankrd49;Ythdf1;Trmt10c;Ash1l;Mapk7;Ptch1;Pten;Arid1b;Tnrc6c;Rlf;Nif3l1;Bcl9;Rbm15;Sox9;Tcf20;Tfap2a;Prdm2;Kmt2d;Arid1a;Fzd7;Rbm4b;Hyal2;Bag2;Zbtb24
GO_HISTONE_METHYLTRANSFERASE_ACTIVITY_H3_K4_SPECIFIC_	0.0179521	Setd1b;Ash1l;Kmt2d
GO_NEGATIVE_REGULATION_OF_PEPTIDYL_THREONINE_PHOSPHORYLATION	0.0180975	Spry2;Smad7;Ddit4
GO_NEGATIVE_REGULATION_OF_T_HELPER_17_CELL_DIFFERENTIATION	0.0185163	Smad7;Zbtb7b
GO_NEGATIVE_REGULATION_OF_UBIQUITIN_PROTEIN_LIGASE_ACTIVITY	0.0185518	Fbxo5;Bag2
GO_PERK_MEDIATED_UNFOLDED_PROTEIN_RESPONSE	0.0186838	Hspa5;Nck1;Nfe2l2
GO_NEGATIVE_REGULATION_OF_RNA_BIOSYNTHETIC_PROCESS	0.0187012	Zbtb33;Cited2;N4bp2l2;Cenpf;Ccdc85b;Dnajb4;Foxn3;Zfpm1;Zhx2;Zbtb1;Hic2;Kctd1;Arhgap35;Hoxa2;Hoxb8;Dnajb1;Atxn1l;Jund;Pramef8;Smad7;Myc;Nck1;Nfix;Zbtb21;Zbtb7b;Klf3;Zbtb7a;Bcl11a;Mepce;Ptch1;Cbx8;Nif3l1;Sox9;Tfap2a;Tgif1;Kmt2d;Arid1a;Cbx2;Cggbp1;Bhlhe40;Tceal1;Zbtb24;Setdb1;Casp8ap2
GO_ANAPHASE_PROMOTING_COMPLEX_BINDING	0.0194502	Fbxo5;Pten
GO_CHAPERONE_BINDING	0.0196472	Dnajb4;Hspa5;Dnajb1;Tbcc;Dnlz;Bag5;Bag2
GO_NEGATIVE_REGULATION_OF_ALPHA_BETA_T_CELL_DIFFERENTIATION	0.0196556	Smad7;Zbtb7b;Socs5
GO_NUCLEASE_ACTIVITY	0.0197451	Pop7;Rpp38;Eri2;Toe1;Pde12;Fen1;Aste1;Dbr1;Aen;Mrpl44;Exo1
GO_RESPONSE_TO_NERVE_GROWTH_FACTOR	0.0198893	Rab35;Crk;Hspa5;Arf6;Pten
GO_NEGATIVE_REGULATION_OF_CELLULAR_RESPONSE_TO_VASCULAR_ENDOTHELIAL_GROWTH_FACTOR_STIMULUS	0.0202182	Spry2;Sema6a
GO_BETA_CATENIN_TCF_COMPLEX_ASSEMBLY	0.0203993	Bcl9l;Myc;Bcl9;Kmt2d
GO_CELLULAR_RESPONSE_TO_FLUID_SHEAR_STRESS	0.0207477	Nfe2l2;Mapk7;Socs5
GO_NEGATIVE_REGULATION_OF_CELL_GROWTH	0.0209126	Ccdc85b;Dcun1d3;Sh3bp4;Sertad3;Ing1;Bcl11a;Sema6a;Osgin2;Ppp1r9b;Hyal2
GO_NEGATIVE_REGULATION_OF_STEM_CELL_DIFFERENTIATION	0.0212737	N4bp2l2;Nfe2l2;Cdk12
GO_AMINOGLYCAN_BIOSYNTHETIC_PROCESS	0.0213571	Vcan;Cspg4;Dse;Has3;B3gnt8;Chpf;Dsel;Hs6st1
GO_INTERFERON_GAMMA_BIOSYNTHETIC_PROCESS	0.0214327	Cebpg;Zfpm1
GO_SINGLE_STRANDED_DNA_EXODEOXYRIBONUCLEASE_ACTIVITY	0.0215507	Eri2;Exo1
GO_HISTONE_METHYLTRANSFERASE_ACTIVITY	0.0216206	Setd1b;Ash1l;Prdm2;Kmt2d;Setdb1
GO_INTERLEUKIN_5_SECRETION	0.0218271	Il17ra;Tnfrsf21
GO_PLASMA_MEMBRANE_TO_ENDOSOME_TRANSPORT	0.0218385	Rab35;Commd1
GO_RAC_PROTEIN_SIGNAL_TRANSDUCTION	0.0219994	Crk;Auts2;Arf6;Rhog
GO_MITOCHONDRIAL_RNA_MODIFICATION	0.0220193	Trmt10c;Trmt5
GO_RETINA_MORPHOGENESIS_IN_CAMERA_TYPE_EYE	0.0221928	Topors;Zhx2;Sox9;Tfap2a
GO_INTERLEUKIN_13_SECRETION	0.0223051	Il17ra;Tnfrsf21
GO_RNA_PHOSPHODIESTER_BOND_HYDROLYSIS	0.0223585	Pop7;Rpp38;Eri2;Toe1;Pde12;Fen1;Dbr1;Mrpl44;Exo1
GO_NUCLEAR_TRANSCRIBED_MRNA_CATABOLIC_PROCESS_DEADENYLATION_DEPENDENT_DECAY	0.0224501	Pde12;Tnrc6a;Cnot4;Tnrc6c;Zfp36l1;Tnks1bp1
GO_NEGATIVE_REGULATION_OF_CD4_POSITIVE_ALPHA_BETA_T_CELL_ACTIVATION	0.0227114	Smad7;Zbtb7b;Socs5
GO_REGULATION_OF_NUCLEAR_TRANSCRIBED_MRNA_CATABOLIC_PROCESS_DEADENYLATION_DEPENDENT_DECAY	0.0227336	Tnrc6a;Tnrc6c;Zfp36l1
GO_PEPTIDYL_LYSINE_METHYLATION	0.0230176	Tet3;Setd1b;Auts2;Ash1l;Rlf;Prdm2;Kmt2d;Setdb1
GO_RNA_5_END_PROCESSING	0.0234758	Pop7;Rpp38;Trmt10c
GO_CELLULAR_RESPONSE_TO_LAMINAR_FLUID_SHEAR_STRESS	0.0235418	Nfe2l2;Mapk7
GO_MEGAKARYOCYTE_DIFFERENTIATION	0.023614	Zfpm1;Tnrc6a;Cnot4;Tnrc6c;Rbm15;Kmt2d
GO_POSITIVE_REGULATION_OF_MRNA_CATABOLIC_PROCESS	0.0238052	Ythdf3;Tnrc6a;Ythdf2;Tnrc6c;Zfp36l1
GO_PROTEIN_METHYLTRANSFERASE_ACTIVITY	0.023898	Setd1b;Ash1l;Prdm2;Kmt2d;Lcmt2;Setdb1
GO_MEIOTIC_SPINDLE	0.0244378	Aspm;Fbxo5
GO_NEGATIVE_REGULATION_OF_MAP_KINASE_ACTIVITY	0.0247412	Hipk3;Spry2;Dusp14;Dusp6;Dusp16;Hyal2
GO_DNA_INTEGRATION	0.024803	Nynrin;Rlf
GO_RESPONSE_TO_UV	0.0250431	Dcun1d3;Sde2;Fen1;Zbtb1;Myc;Scara3;Usp1;Rhno1;Hyal2
GO_NEGATIVE_REGULATION_OF_IMMUNE_SYSTEM_PROCESS	0.0260121	N4bp2l2;Crk;Zfpm1;Tnfrsf21;Hoxb8;Smad7;Myc;Nfe2l2;Zbtb7b;Peli1;Rbm15;Sox9;Zfp36l1;Socs6;Socs5;Lrrc14
GO_REGULATION_OF_STEM_CELL_PROLIFERATION	0.0264197	N4bp2l2;Kdf1;Aspm;Atxn1l;Zfp36l1
GO_NEGATIVE_REGULATION_OF_CELL_ADHESION	0.0267137	Tnfrsf21;Smad7;Zbtb7b;Ythdf2;Mapk7;Peli1;Pten;Sema6a;Cbll1;Fzd7;Socs6;Socs5
GO_POSITIVE_REGULATION_OF_CYTOPLASMIC_TRANSLATION	0.0271291	Nck1;Ythdf2
GO_NEGATIVE_REGULATION_OF_TRANSCRIPTION_BY_COMPETITIVE_PROMOTER_BINDING	0.0272489	Smad7;Tfap2a
GO_REGULATION_OF_FAT_CELL_DIFFERENTIATION	0.027327	Ccdc85b;Zfpm1;Zbtb7c;Metrnl;Zbtb7b;Mex3c;Ccdc71;Zfp36l1
GO_EXONUCLEASE_ACTIVITY_ACTIVE_WITH_EITHER_RIBO_OR_DEOXYRIBONUCLEIC_ACIDS_AND_PRODUCING_5_PHOSPHOMONOESTERS	0.0277578	Eri2;Toe1;Pde12;Fen1;Exo1
GO_NEGATIVE_REGULATION_OF_PROTEIN_KINASE_B_SIGNALING	0.0281901	Dag1;Phlda3;Pten;Hyal2
GO_SKELETAL_MUSCLE_TISSUE_REGENERATION	0.0282575	Dag1;Bcl9;Fzd7
GO_SOMATIC_STEM_CELL_POPULATION_MAINTENANCE	0.0292567	Zhx2;Bcl9l;Polr2l;Bcl9;Sox9
GO_3_PHOSPHOADENOSINE_5_PHOSPHOSULFATE_METABOLIC_PROCESS	0.0294977	Impad1;Tpst2
GO_NEGATIVE_REGULATION_OF_PEPTIDYL_SERINE_PHOSPHORYLATION	0.0296811	Smad7;Nck1;Ddit4
GO_CHROMATIN_MEDIATED_MAINTENANCE_OF_TRANSCRIPTION	0.0297488	Arid1b;Arid1a
GO_ORGANELLAR_RIBOSOME	0.0301325	Mrpl55;Mrps2;Mrpl50;Mrps12;Mrpl14;Mrpl44
GO_EXONUCLEASE_ACTIVITY	0.0301619	Eri2;Toe1;Pde12;Fen1;Aen;Exo1
GO_CATALYTIC_ACTIVITY_ACTING_ON_A_TRNA	0.0302058	Pop7;Rpp38;Mettl6;Bcdin3d;Pars2;Trmt10c;Trmt5;Lcmt2
GO_NEGATIVE_REGULATION_OF_PHOSPHORYLATION	0.0305034	Hipk3;Spry2;Dusp14;Socs4;Dag1;Dusp6;Pde12;Apc;Smad7;Myc;Nck1;Ddit4;Ash1l;Pten;Sema6a;Ywhag;Dusp16;Hyal2;Socs5
GO_FLAP_ENDONUCLEASE_ACTIVITY	0.0308946	Fen1;Exo1
GO_POSTTRANSLATIONAL_PROTEIN_TARGETING_TO_ENDOPLASMIC_RETICULUM_MEMBRANE	0.0310107	Hspa5;Sec62
GO_CONTRACTILE_RING	0.0310664	Dag1;Alkbh4
GO_MAINTENANCE_OF_ORGANELLE_LOCATION	0.0311462	Aspm;Arhgap21
GO_NEGATIVE_REGULATION_OF_I_KAPPAB_KINASE_NF_KAPPAB_SIGNALING	0.0311531	Tank;Trim59;Ash1l;Usp10
GO_REGULATION_OF_OXIDATIVE_STRESS_INDUCED_INTRINSIC_APOPTOTIC_SIGNALING_PATHWAY	0.0315385	Nfe2l2;Mapk7;Bag5
GO_INTRINSIC_APOPTOTIC_SIGNALING_PATHWAY_IN_RESPONSE_TO_DNA_DAMAGE_BY_P53_CLASS_MEDIATOR	0.0317527	Topors;Phlda3;Ddit4;Aen
GO_DNA_BINDING_TRANSCRIPTION_REPRESSOR_ACTIVITY_RNA_POLYMERASE_II_SPECIFIC	0.0317926	Zfpm1;Hic2;Arhgap35;Hoxa2;Myc;Zbtb7a;Bcl11a;Tfap2a;Tgif1;Cggbp1;Bhlhe40
GO_SULFUR_AMINO_ACID_CATABOLIC_PROCESS	0.0318462	Tst;Ado
GO_MIDBODY	0.0321051	Topors;Cenpf;Aspm;Champ1;Hspa5;Arf6;Alkbh4;Klhl9;Ptch1;Keap1
GO_POSITIVE_REGULATION_OF_FAT_CELL_DIFFERENTIATION	0.0328367	Zbtb7c;Metrnl;Zbtb7b;Ccdc71;Zfp36l1
GO_PROTEIN_TYROSINE_SERINE_THREONINE_PHOSPHATASE_ACTIVITY	0.033017	Dusp14;Dusp6;Pten;Dusp16
GO_NEGATIVE_REGULATION_OF_DENDRITE_DEVELOPMENT	0.0330172	Arf6;Bcl11a;Pten
GO_GROWTH	0.0330335	Spry2;Rai1;Ccdc85b;Cish;Socs4;Dcun1d3;Kdf1;Dag1;Dusp6;Kctd6;Adnp2;Sh3bp4;Aspm;Auts2;Kif26a;Sertad3;Ing1;Nedd9;Mex3c;Scara3;Bcl11a;Ptch1;Pten;Sema6a;Bcl9;Sox9;Zfp36l1;Osgin2;Kmt2d;Mkks;Fzd7;Ppp1r9b;Hyal2;Socs6;Socs5
GO_IMMATURE_B_CELL_DIFFERENTIATION	0.0330727	Irf2bp2;Lrrc8a
GO_REGULATION_OF_DNA_BINDING_TRANSCRIPTION_FACTOR_ACTIVITY	0.033192	Trim13;Cebpg;Commd1;Pprc1;Tab2;Rwdd3;Smad7;Zbtb7a;Mbtps2;Peli1;Ptch1;Pten;Rnf25;Arhgef5;Bhlhe40;Lrrc14;Keap1
GO_NEGATIVE_REGULATION_OF_CELL_CELL_ADHESION	0.0337079	Tnfrsf21;Smad7;Zbtb7b;Ythdf2;Mapk7;Peli1;Socs6;Socs5
GO_OPTIC_CUP_MORPHOGENESIS_INVOLVED_IN_CAMERA_TYPE_EYE_DEVELOPMENT	0.0340526	Tfap2a;Arid1a
GO_REGULATION_OF_CYTOPLASMIC_TRANSLATION	0.0340749	Nck1;Ythdf2;Dph7
GO_CELLULAR_RESPONSE_TO_RADIATION	0.0341171	Tank;Sde2;Zbtb1;Opn3;Hspa5;Myc;Fignl1;Rhno1;Tnks1bp1;Hyal2
GO_N_METHYLTRANSFERASE_ACTIVITY	0.0341748	Setd1b;Ash1l;Prdm2;Kmt2d;Fdxacb1;Setdb1
GO_PHOSPHATIDYLINOSITOL_4_5_BISPHOSPHATE_BINDING	0.0342545	Rab35;Snx18;Commd1;Phlda3;Fzd7
GO_TRANSITION_METAL_ION_HOMEOSTASIS	0.0343565	Commd1;Fbxl5;Hmox2;Myc;Slc39a10;Slc25a28;Hyal2
GO_MULTIMERIC_RIBONUCLEASE_P_COMPLEX	0.0344231	Pop7;Rpp38
GO_RIBONUCLEASE_P_ACTIVITY	0.0344231	Pop7;Rpp38
GO_AXONAL_FASCICULATION	0.0358756	Tnfrsf21;Arhgap35;Amigo1
GO_REGULATION_OF_T_HELPER_CELL_DIFFERENTIATION	0.0359492	Smad7;Zbtb7b;Socs5
GO_CHONDROITIN_SULFATE_METABOLIC_PROCESS	0.0361105	Impad1;Dsel
GO_FATTY_ACID_SYNTHASE_ACTIVITY	0.0361724	Oxsm;Elovl6
GO_MRNA_METHYLTRANSFERASE_ACTIVITY	0.0361848	Trmt10c;Cmtr2
GO_TRANSCRIPTION_COREGULATOR_ACTIVITY	0.0364569	Cited2;N4bp2l2;Zhx2;Pprc1;Taf5l;Bcl9l;Kctd1;Arhgap35;Dnajb1;Jund;Med11;Zbtb7a;Pou3f1;Med18;Arid1b;Bcl9;Tcf20;Tfap2a;Tgif1;Kmt2d;Arid1a;Bhlhe40;Hyal2;Casp8ap2
GO_REGULATION_OF_PSEUDOPODIUM_ASSEMBLY	0.0366649	Cdc42ep1;Apc
GO_MITOCHONDRIAL_GENE_EXPRESSION	0.0367694	Mrpl55;Mrps2;Mrpl50;Trmt10c;Trmt5;Mrps12;Mrpl14;Mrpl44;Tefm
GO_MITOCHONDRIAL_TRNA_PROCESSING	0.0368361	Trmt10c;Trmt5
GO_EXODEOXYRIBONUCLEASE_ACTIVITY	0.0370017	Eri2;Fen1;Exo1
GO_B_CELL_ACTIVATION	0.0372525	Cebpg;Zbtb1;Tnfrsf21;Irf2bp2;Zbtb7a;Lrrc8a;Peli1;Slc39a10;Zfp36l1;Exo1
GO_POSITIVE_REGULATION_OF_TRANSCRIPTION_FROM_RNA_POLYMERASE_II_PROMOTER_IN_RESPONSE_TO_ENDOPLASMIC_RETICULUM_STRESS	0.0374656	Hspa5;Mbtps2
GO_POSITIVE_REGULATION_OF_BROWN_FAT_CELL_DIFFERENTIATION	0.0375239	Metrnl;Zbtb7b
GO_REGULATION_OF_PERK_MEDIATED_UNFOLDED_PROTEIN_RESPONSE	0.0378314	Hspa5;Nck1
GO_REGULATION_OF_PEPTIDYL_THREONINE_PHOSPHORYLATION	0.037857	Spry2;Smad7;Ddit4;Tnks1bp1
GO_CELL_PROLIFERATION_INVOLVED_IN_METANEPHROS_DEVELOPMENT	0.0379185	Myc;Ptch1
GO_NEGATIVE_REGULATION_OF_ENDOPLASMIC_RETICULUM_UNFOLDED_PROTEIN_RESPONSE	0.038757	Hspa5;Nck1
GO_ANATOMICAL_STRUCTURE_MATURATION	0.0388253	Fem1b;Cln5;Dag1;Fbxo5;Zbtb7a;Mbtps2;Ythdf2;Bcl11a
GO_RACEMASE_AND_EPIMERASE_ACTIVITY_ACTING_ON_CARBOHYDRATES_AND_DERIVATIVES	0.0389341	Dse;Dsel
GO_GLYCOPROTEIN_METABOLIC_PROCESS	0.0390652	Trim13;Vcan;Cspg4;Dse;Impad1;Chpf;Dsel;Hs6st1
GO_NEURAL_RETINA_DEVELOPMENT	0.0391764	Topors;Zhx2;Sox9;Tfap2a
GO_NEGATIVE_REGULATION_OF_LEUKOCYTE_CELL_CELL_ADHESION	0.0392064	Tnfrsf21;Smad7;Zbtb7b;Peli1;Socs6;Socs5
GO_CELLULAR_RESPONSE_TO_INSULIN_LIKE_GROWTH_FACTOR_STIMULUS	0.0392241	Crk;Pten
GO_POSITIVE_REGULATION_OF_BIOSYNTHETIC_PROCESS	0.0394365	Topors;Cited2;Cebpg;Rai1;Dbf4;Spin1;Adora2b;Zfpm1;Tet3;Zbtb7c;Setx;Pprc1;Fosl2;Rab38;Ythdf3;Auts2;Taf5l;Bcl9l;Sertad3;Sertad1;Has3;Hoxa1;Hoxa2;Hspa5;Irf2bp2;Ing1;Jund;Rhog;Smad7;Myc;Nck1;Nfe2l2;Nfix;Pcbp1;Zbtb7b;Mbtps2;Ythdf2;Cdk12;Pou3f1;Ankrd49;Ythdf1;Trmt10c;Ash1l;Mapk7;Ptch1;Cbx8;Arid1b;Mid1ip1;Rlf;Nif3l1;Bcl9;Rbm15;Sox9;Tcf20;Tfap2a;Prdm2;Kmt2d;Arid1a;Fzd7;Hyal2;Zbtb24;Epm2aip1
GO_HISTONE_METHYLATION	0.0402431	Tet3;Setd1b;Auts2;Ash1l;Rlf;Prdm2;Kmt2d;Setdb1
GO_MEIOTIC_SPINDLE_ORGANIZATION	0.0408305	Aspm;Fbxo5
GO_RESPONSE_TO_IONIZING_RADIATION	0.0408339	Tank;Trim13;Dcun1d3;Hspa5;Myc;Fignl1;Aen;Rhno1;Tnks1bp1
GO_RNA_SPLICING	0.0408545	Clp1;Snrnp35;Cstf1;Scaf8;Setx;Aar2;Pcbp1;Dbr1;Zbtb7a;Cdk12;Polr2l;Scaf1;Rbm15;Son;Gemin7;Rbm4b;Ppp1r9b;Lsm10;Wtap
GO_CAMERA_TYPE_EYE_PHOTORECEPTOR_CELL_DIFFERENTIATION	0.0409596	Topors;Sox9
GO_ATTACHMENT_OF_SPINDLE_MICROTUBULES_TO_KINETOCHORE	0.0410879	Champ1;Apc;Mis12
GO_MITOCHONDRIAL_TRANSLATIONAL_TERMINATION	0.041276	Mrpl55;Mrps2;Mrpl50;Mrps12;Mrpl14;Mrpl44
GO_ATF6_MEDIATED_UNFOLDED_PROTEIN_RESPONSE	0.041511	Hspa5;Mbtps2
GO_NEGATIVE_REGULATION_OF_KINASE_ACTIVITY	0.0417513	Hipk3;Spry2;Dusp14;Socs4;Dusp6;Apc;Nck1;Pten;Ywhag;Dusp16;Hyal2;Socs5
GO_CYSTEINE_TYPE_ENDOPEPTIDASE_REGULATOR_ACTIVITY_INVOLVED_IN_APOPTOTIC_PROCESS	0.0420113	Tnfaip8;Birc3;Casp8ap2
GO_HEART_VALVE_FORMATION	0.042164	Zfpm1;Sox9
GO_HYALURONIC_ACID_BINDING	0.0425719	Vcan;Hyal2
GO_TRNA_5_LEADER_REMOVAL	0.0425972	Pop7;Rpp38
GO_NEGATIVE_REGULATION_OF_MULTICELLULAR_ORGANISM_GROWTH	0.0430302	Rai1;Ptch1
GO_TRNA_THREONYLCARBAMOYLADENOSINE_METABOLIC_PROCESS	0.0431568	Trmt10c;Trmt5
GO_FAT_CELL_DIFFERENTIATION	0.0433575	Arl4a;Ccdc85b;Zfpm1;Zbtb7c;Metrnl;Zbtb7b;Mex3c;Zbtb7a;Ccdc71;Zfp36l1;Mkks
GO_POSITIVE_REGULATION_OF_RNA_BIOSYNTHETIC_PROCESS	0.0434954	Topors;Cited2;Cebpg;Rai1;Spin1;Zfpm1;Tet3;Zbtb7c;Setx;Pprc1;Fosl2;Auts2;Taf5l;Bcl9l;Sertad3;Sertad1;Has3;Hoxa1;Hoxa2;Hspa5;Irf2bp2;Ing1;Jund;Rhog;Smad7;Myc;Nck1;Nfe2l2;Nfix;Pcbp1;Zbtb7b;Mbtps2;Cdk12;Pou3f1;Ankrd49;Ash1l;Mapk7;Ptch1;Arid1b;Rlf;Nif3l1;Bcl9;Rbm15;Sox9;Tcf20;Tfap2a;Prdm2;Kmt2d;Arid1a;Fzd7;Hyal2;Zbtb24
GO_ACTIVATING_TRANSCRIPTION_FACTOR_BINDING	0.0435707	Zfpm1;Myc;Nfe2l2;Zbtb7a;Bhlhe40
GO_CHONDROCYTE_DEVELOPMENT	0.0438238	Mex3c;Scara3;Impad1;Sox9
GO_B_CELL_APOPTOTIC_PROCESS	0.0442506	Tnfrsf21;Slc39a10;Pten
GO_SULFURTRANSFERASE_ACTIVITY	0.044406	Mocs3;Tst
GO_NEGATIVE_REGULATION_OF_PROTEIN_TYROSINE_KINASE_ACTIVITY	0.0447519	Socs4;Hyal2;Socs5
GO_MORPHOGENESIS_OF_A_BRANCHING_STRUCTURE	0.0447934	Fem1b;Spry2;Gna13;Dag1;Myc;Bcl11a;Ptch1;Fkbpl;Rbm15;Sox9
GO_SULFUR_COMPOUND_CATABOLIC_PROCESS	0.0449895	Vcan;Cspg4;Tst;Ado
GO_REGULATION_OF_RIBOSOME_BIOGENESIS	0.045378	Shq1;Pten
GO_BRANCHING_INVOLVED_IN_BLOOD_VESSEL_MORPHOGENESIS	0.0457548	Gna13;Fkbpl;Rbm15
GO_RESPONSE_TO_LIGHT_STIMULUS	0.0469518	Dcun1d3;Sde2;Fen1;Zbtb1;Opn3;Hoxa1;Myc;Scara3;Usp1;Rhno1;Rbm4b;Bhlhe40;Hyal2
GO_T_CELL_DIFFERENTIATION_INVOLVED_IN_IMMUNE_RESPONSE	0.0470599	Zfpm1;Smad7;Zbtb7b;Socs5
GO_REGULATION_OF_GONAD_DEVELOPMENT	0.0478051	Cited2;Sox9
GO_MANNOSE_BINDING	0.0482673	Cln5;Scara3
GO_INACTIVATION_OF_MAPK_ACTIVITY	0.0493328	Dusp14;Dusp6;Dusp16
GO_NUCLEAR_BODY	0.0494284	Hipk3;Topors;Dbf4;Ckap4;Toe1;Zbtb1;Setx;Setd1b;Taf5l;Nxt1;Mki67;Pcbp1;Cdk12;Phax;Impad1;Mapk7;Pten;Nufip2;Rbm15;Son;Tcf20;Gemin7;Cbll1;Rbm4b;Dyrk3;Lsm10;Bhlhe40;Exo1;Wtap;Casp8ap2
GO_RESPONSE_TO_ABIOTIC_STIMULUS	0.0496237	Tank;Trim13;Cited2;Dnajb4;Dcun1d3;Dag1;Sde2;Fen1;Zbtb1;Opn3;Rwdd3;Metrnl;Hmox2;Hoxa1;Hspa5;Dnajb1;Jund;Malat1;Myc;Nfe2l2;Scara3;Ddit4;Lrrc8a;Ptch1;Pten;Fkbpl;Fignl1;Aen;Sox9;Zfp36l1;Usp1;Mkks;Rhno1;Rbm4b;Tnks1bp1;Bhlhe40;Hyal2;Bag5;Bag2;Casp8ap2

## Sheet: Epi suprabasal
GO terms enriched	p value	Genes enriched
GO_ENDONUCLEASE_COMPLEX	2.22866e-05	Pop7;Rpp38;Clp1;Trmt10c
GO_RIBONUCLEASE_P_COMPLEX	4.86038e-05	Pop7;Rpp38;Trmt10c
GO_MITOCHONDRIAL_PROTEIN_COMPLEX	6.74774e-05	Ndufv3;Ndufaf1;Mrps2;Mrpl50;Trmt10c;Mrps12;Mrpl14;Uqcrfs1
GO_TRNA_5_END_PROCESSING	0.000104942	Pop7;Rpp38;Trmt10c
GO_ORGANELLE_INNER_MEMBRANE	0.000210014	Ndufaf4;Ndufv3;Ndufaf1;Mrps2;Mrpl50;Tmem70;Mrps12;Mrpl14;Uqcrfs1;Tmem11
GO_RNA_5_END_PROCESSING	0.000248031	Pop7;Rpp38;Trmt10c
GO_ENVELOPE	0.0002527	Spin1;Ndufaf4;Nxt1;Ndufv3;Ndufaf1;Mrps2;Mrpl50;Tmem70;Mrps12;Rbm15;Mrpl14;Coa7;Uqcrfs1;Tmem11;Mad2l1bp
GO_REGULATION_OF_CYTOPLASMIC_TRANSLATIONAL_INITIATION	0.000435787	Nck1;Ythdf2
GO_CAP_INDEPENDENT_TRANSLATIONAL_INITIATION	0.000440515	Nck1;Ythdf2
GO_TRNA_PROCESSING	0.000670049	Pop7;Rpp38;Clp1;Trmt10c;Lcmt2
GO_MITOCHONDRIAL_ENVELOPE	0.000708554	Ndufaf4;Ndufv3;Ndufaf1;Mrps2;Mrpl50;Tmem70;Mrps12;Mrpl14;Coa7;Uqcrfs1;Tmem11
GO_DNA_TEMPLATED_TRANSCRIPTION_TERMINATION	0.00082474	Clp1;Polr2l;Med18;Lsm10
GO_NUCLEOLAR_RIBONUCLEASE_P_COMPLEX	0.000885216	Pop7;Rpp38
GO_TERMINATION_OF_RNA_POLYMERASE_II_TRANSCRIPTION	0.00102352	Clp1;Med18;Lsm10
GO_POSITIVE_REGULATION_OF_CYTOPLASMIC_TRANSLATION	0.00112473	Nck1;Ythdf2
GO_MITOCHONDRIAL_PART	0.00123077	Ndufaf4;Ndufv3;Ndufaf1;Mrps2;Mrpl50;Trmt10c;Tmem70;Mrps12;Mrpl14;Coa7;Tst;Uqcrfs1;Tmem11
GO_MITOCHONDRIAL_TRANSLATION	0.00141414	Mrps2;Mrpl50;Trmt10c;Mrps12;Mrpl14
GO_MULTIMERIC_RIBONUCLEASE_P_COMPLEX	0.00178028	Pop7;Rpp38
GO_RIBONUCLEASE_P_ACTIVITY	0.00178028	Pop7;Rpp38
GO_MITOCHONDRION	0.00203636	Fam210a;Rab38;Ndufaf4;Ndufv3;Ndufaf1;Mrps2;Mrpl50;Trmt10c;Tmem70;Nif3l1;Mrps12;Mrpl14;Coa7;Tst;Uqcrfs1;Tmem11
GO_ORGANELLAR_RIBOSOME	0.00210174	Mrps2;Mrpl50;Mrps12;Mrpl14
GO_TRNA_5_LEADER_REMOVAL	0.0021891	Pop7;Rpp38
GO_MITOCHONDRIAL_TRANSLATIONAL_TERMINATION	0.0023451	Mrps2;Mrpl50;Mrps12;Mrpl14
GO_MITOCHONDRIAL_GENE_EXPRESSION	0.00253837	Mrps2;Mrpl50;Trmt10c;Mrps12;Mrpl14
GO_TRNA_METABOLIC_PROCESS	0.00294733	Pop7;Rpp38;Clp1;Trmt10c;Lcmt2
GO_TRANSLATIONAL_TERMINATION	0.00359133	Mrps2;Mrpl50;Mrps12;Mrpl14
GO_CATALYTIC_ACTIVITY_ACTING_ON_A_TRNA	0.00393432	Pop7;Rpp38;Trmt10c;Lcmt2
GO_TRNA_SPECIFIC_RIBONUCLEASE_ACTIVITY	0.00399723	Pop7;Rpp38
GO_RIBONUCLEOPROTEIN_COMPLEX	0.0044172	Pop7;Rpp38;Nck1;Mrps2;Ythdf2;Mrpl50;Trmt10c;Imp3;Mrps12;Mrpl14;Lsm10
GO_MITOCHONDRIAL_MEMBRANE_PART	0.00451703	Ndufv3;Ndufaf1;Tmem70;Uqcrfs1;Tmem11
GO_CELLULAR_PROTEIN_COMPLEX_DISASSEMBLY	0.0049308	Mrps2;Mrpl50;Mid1ip1;Mrps12;Mrpl14
GO_NADH_DEHYDROGENASE_COMPLEX_ASSEMBLY	0.00524345	Ndufaf4;Ndufv3;Ndufaf1
GO_PROTEIN_CONTAINING_COMPLEX_DISASSEMBLY	0.00581185	Arid2;Mrps2;Mrpl50;Mid1ip1;Mrps12;Mrpl14
GO_RNA_METHYLATION	0.00612092	Trmt10c;Rbm15;Lcmt2
GO_BRANCHING_INVOLVED_IN_BLOOD_VESSEL_MORPHOGENESIS	0.00626592	Fkbpl;Rbm15
GO_RNA_METABOLIC_PROCESS	0.00706566	Pop7;Rpp38;Clp1;Polr2l;Trmt10c;Imp3;Ddx24;Rbm15;Son;Gemin7;Lsm10;Lcmt2
GO_REGULATION_OF_CYTOPLASMIC_TRANSLATION	0.00720858	Nck1;Ythdf2
GO_TRANSLATIONAL_ELONGATION	0.00734625	Mrps2;Mrpl50;Mrps12;Mrpl14
GO_POSITIVE_REGULATION_OF_TRANSLATIONAL_INITIATION	0.00785402	Nck1;Ythdf2
GO_CATALYTIC_ACTIVITY_ACTING_ON_RNA	0.00884218	Pop7;Rpp38;Polr2l;Trmt10c;Ddx24;Lcmt2
GO_RESPIRATORY_CHAIN_COMPLEX	0.00884411	Ndufv3;Ndufaf1;Uqcrfs1
GO_RIBOSOME	0.010914	Nck1;Mrps2;Mrpl50;Mrps12;Mrpl14
GO_CELLULAR_PROTEIN_CONTAINING_COMPLEX_ASSEMBLY	0.0112789	Clp1;Ndufaf4;Arf6;Nck1;Ndufv3;Ndufaf1;Mrps2;Tmem70;Mid1ip1;Tbcc;Gemin7
GO_TRNA_METHYLTRANSFERASE_ACTIVITY	0.0113226	Trmt10c;Lcmt2
GO_RAC_PROTEIN_SIGNAL_TRANSDUCTION	0.0117603	Arf6;Rhog
GO_ENDORIBONUCLEASE_ACTIVITY_PRODUCING_5_PHOSPHOMONOESTERS	0.0120639	Pop7;Rpp38
GO_CYTOPLASMIC_TRANSLATIONAL_INITIATION	0.0127263	Nck1;Ythdf2
GO_RESPIRASOME	0.0137328	Ndufv3;Ndufaf1;Uqcrfs1
GO_NCRNA_PROCESSING	0.0141507	Pop7;Rpp38;Clp1;Trmt10c;Imp3;Lcmt2
GO_ORGANELLAR_SMALL_RIBOSOMAL_SUBUNIT	0.0141876	Mrps2;Mrps12
GO_NUCLEOLAR_PART	0.0149469	Pop7;Rpp38;Polr2l;Imp3
GO_TRNA_METHYLATION	0.0151828	Trmt10c;Lcmt2
GO_ATP_SYNTHESIS_COUPLED_ELECTRON_TRANSPORT	0.0152166	Ndufv3;Ndufaf1;Uqcrfs1
GO_MITOCHONDRIAL_RESPIRATORY_CHAIN_COMPLEX_ASSEMBLY	0.0160357	Ndufaf4;Ndufv3;Ndufaf1
GO_TRNA_ADENINE_METHYLTRANSFERASE_ACTIVITY	0.0165427	Trmt10c
GO_POSITIVE_REGULATION_OF_HEMATOPOIETIC_STEM_CELL_PROLIFERATION	0.0165546	N4bp2l2
GO_TRANSFERASE_ACTIVITY_TRANSFERRING_SULFUR_CONTAINING_GROUPS	0.0170005	Tst;Tpst2
GO_MITOCHONDRIAL_TRNA_METHYLATION	0.017001	Trmt10c
GO_NCRNA_TRANSCRIPTION	0.0172801	Spin1;Phax;Polr2l
GO_POSITIVE_REGULATION_OF_PHOSPHOLIPID_BIOSYNTHETIC_PROCESS	0.0182322	Rab38
GO_OXIDOREDUCTASE_COMPLEX	0.0185374	Ndufv3;Ndufaf1;Uqcrfs1
GO_RUFFLE_ASSEMBLY	0.0196541	Arf6;Rhog
GO_MITOCHONDRIAL_PROTON_TRANSPORTING_ATP_SYNTHASE_COMPLEX_ASSEMBLY	0.0201847	Tmem70
GO_ENDONUCLEASE_ACTIVITY_ACTIVE_WITH_EITHER_RIBO_OR_DEOXYRIBONUCLEIC_ACIDS_AND_PRODUCING_5_PHOSPHOMONOESTERS	0.0202207	Pop7;Rpp38
GO_INNER_MITOCHONDRIAL_MEMBRANE_PROTEIN_COMPLEX	0.0222957	Ndufv3;Ndufaf1;Uqcrfs1
GO_REGULATION_OF_HEMATOPOIETIC_STEM_CELL_PROLIFERATION	0.0232792	N4bp2l2
GO_REGULATION_OF_PHOSPHATIDYLCHOLINE_BIOSYNTHETIC_PROCESS	0.0234979	Rab38
GO_RNA_IMPORT_INTO_MITOCHONDRION	0.0238882	Tst
GO_RESPIRATORY_ELECTRON_TRANSPORT_CHAIN	0.0241057	Ndufv3;Ndufaf1;Uqcrfs1
GO_RNA_SPLICING	0.0252295	Clp1;Polr2l;Rbm15;Son;Gemin7;Lsm10
GO_RESPONSE_TO_NERVE_GROWTH_FACTOR	0.0256305	Arf6;Ngf
GO_MAINTENANCE_OF_POSTSYNAPTIC_SPECIALIZATION_STRUCTURE	0.0267921	Arf6
GO_OXIDATIVE_PHOSPHORYLATION	0.0268321	Ndufv3;Ndufaf1;Uqcrfs1
GO_PROTON_TRANSPORTING_ATP_SYNTHASE_COMPLEX_ASSEMBLY	0.0268848	Tmem70
GO_TETRAPYRROLE_CATABOLIC_PROCESS	0.0270656	Hmox2
GO_RIBOSOMAL_SUBUNIT	0.0270777	Mrps2;Mrpl50;Mrps12;Mrpl14
GO_RUFFLE_ORGANIZATION	0.0271011	Arf6;Rhog
GO_PROTEIN_SULFATION	0.0278181	Tpst2
GO_NEGATIVE_REGULATION_OF_PERK_MEDIATED_UNFOLDED_PROTEIN_RESPONSE	0.0280902	Nck1
GO_EIF2ALPHA_PHOSPHORYLATION_IN_RESPONSE_TO_ENDOPLASMIC_RETICULUM_STRESS	0.0289981	Nck1
GO_MRNA_EDITING_COMPLEX	0.0290271	Rbm15
GO_MITOCHONDRIAL_RIBOSOME_ASSEMBLY	0.0295554	Mrps2
GO_TOXIC_SUBSTANCE_BINDING	0.0298434	Phax
GO_MITOCHONDRIAL_RNA_3_END_PROCESSING	0.0301225	Trmt10c
GO_PORPHYRIN_CONTAINING_COMPOUND_METABOLIC_PROCESS	0.0302151	Hmox2
GO_NCRNA_METABOLIC_PROCESS	0.030416	Pop7;Rpp38;Clp1;Trmt10c;Imp3;Lcmt2
GO_MELANOSOME_ASSEMBLY	0.0306817	Rab38
GO_PROTEIN_BINDING_BRIDGING_INVOLVED_IN_SUBSTRATE_RECOGNITION_FOR_UBIQUITINATION	0.030682	Spsb2
GO_1_ACYLGLYCEROPHOSPHOCHOLINE_O_ACYLTRANSFERASE_ACTIVITY	0.0307367	Lpcat2
GO_SULFATION	0.030884	Tpst2
GO_POSITIVE_REGULATION_OF_TRANSLATION_IN_RESPONSE_TO_STRESS	0.0310867	Nck1
GO_MITOCHONDRIAL_RESPIRATORY_CHAIN_COMPLEX_I	0.031176	Ndufv3;Ndufaf1
GO_POSITIVE_REGULATION_OF_PROTEIN_LOCALIZATION_TO_CELL_PERIPHERY	0.0311898	Arf6;Rhog
GO_POSITIVE_REGULATION_OF_CELLULAR_AMIDE_METABOLIC_PROCESS	0.0314514	Nck1;Ythdf2;Trmt10c
GO_RNA_BINDING	0.0315952	Pop7;Dusp14;Ndufv3;Ythdf2;Phax;Trmt10c;Imp3;Ddx24;Mrps12;Rbm15;Mrpl14;Son;Tst;Lsm10
GO_PROTEIN_CARBOXYL_O_METHYLTRANSFERASE_ACTIVITY	0.0325919	Lcmt2
GO_NEGATIVE_REGULATION_OF_HEMATOPOIETIC_PROGENITOR_CELL_DIFFERENTIATION	0.0328028	N4bp2l2
GO_AP_1_ADAPTOR_COMPLEX_BINDING	0.0334994	Rab38
GO_N6_METHYLADENOSINE_CONTAINING_RNA_BINDING	0.0336106	Ythdf2
GO_SIGNAL_COMPLEX_ASSEMBLY	0.0337227	Nck1
GO_CAJAL_BODY	0.0348049	Phax;Lsm10
GO_MITOCHONDRIAL_ELECTRON_TRANSPORT_NADH_TO_UBIQUINONE	0.0355209	Ndufv3;Ndufaf1
GO_RS_DOMAIN_BINDING	0.0358041	Son
GO_MITOCHONDRIAL_MATRIX	0.0358391	Mrps2;Mrpl50;Trmt10c;Mrps12;Mrpl14;Tst
GO_CATALYTIC_COMPLEX	0.035916	Pop7;Rpp38;Clp1;Dynll2;Nck1;Ndufv3;Ndufaf1;Polr2l;Trmt10c;Rbm15;Uqcrfs1;Spsb2
GO_PLATELET_DENSE_GRANULE_ORGANIZATION	0.0363505	Rab38
GO_RRNA_TRANSPORT	0.0365245	Tst
GO_REGULATION_OF_TRANSLATION_IN_RESPONSE_TO_ENDOPLASMIC_RETICULUM_STRESS	0.0367234	Nck1
GO_GAP_JUNCTION_CHANNEL_ACTIVITY	0.0367696	Gjb3
GO_RNA_SPLICING_VIA_TRANSESTERIFICATION_REACTIONS	0.0370263	Clp1;Polr2l;Rbm15;Son;Gemin7
GO_ENDORIBONUCLEASE_ACTIVITY	0.0373201	Pop7;Rpp38
GO_O_ACETYLTRANSFERASE_ACTIVITY	0.0373659	Lpcat2
GO_SUBSTRATE_DEPENDENT_CELL_MIGRATION_CELL_EXTENSION	0.0379453	Nck1
GO_MITOCHONDRION_ORGANIZATION	0.0379799	Rab38;Ndufaf4;Ndufv3;Ndufaf1;Tmem70;Tmem11
GO_POSITIVE_REGULATION_OF_LIPID_BIOSYNTHETIC_PROCESS	0.0381433	Rab38;Mid1ip1
GO_POSITIVE_REGULATION_OF_BROWN_FAT_CELL_DIFFERENTIATION	0.0390395	Metrnl
GO_REGULATION_OF_OOCYTE_MATURATION	0.0392391	Ythdf2
GO_CORONARY_ARTERY_MORPHOGENESIS	0.0394604	Arid2
GO_POSITIVE_REGULATION_OF_PODOSOME_ASSEMBLY	0.0400045	Arhgef5
GO_RIBONUCLEASE_MRP_COMPLEX	0.0402589	Pop7
GO_CELLULAR_COMPONENT_DISASSEMBLY	0.0405108	Arid2;Mrps2;Mrpl50;Mid1ip1;Mrps12;Mrpl14
GO_RAS_PROTEIN_SIGNAL_TRANSDUCTION	0.041257	Rab38;Arf6;Rhog;Ngf;Arhgef5
GO_RNA_METHYLTRANSFERASE_ACTIVITY	0.0415345	Trmt10c;Lcmt2
GO_NUCLEAR_PORE_CENTRAL_TRANSPORT_CHANNEL	0.042271	Nxt1
GO_MITOCHONDRIAL_RNA_MODIFICATION	0.0425614	Trmt10c
GO_RNA_MODIFICATION	0.0426398	Trmt10c;Rbm15;Lcmt2
GO_TRNA_3_END_PROCESSING	0.0431799	Trmt10c
GO_U7_SNRNP	0.0433508	Lsm10
GO_MICROTUBULE_SEVERING_ATPASE_ACTIVITY	0.0436686	Fignl1
GO_MELANOSOME_MEMBRANE	0.0440147	Rab38
GO_GTPASE_ACTIVITY	0.0452802	Rab38;Arf6;Rhog;Tbcc
GO_SUPRAMOLECULAR_FIBER_ORGANIZATION	0.0454313	Arf6;Rhog;Nck1;Mid1ip1;Fignl1;Arhgef5
GO_CARNITINE_SHUTTLE	0.0455289	Mid1ip1
GO_3_PHOSPHOADENOSINE_5_PHOSPHOSULFATE_METABOLIC_PROCESS	0.0456302	Tpst2
GO_CORE_MEDIATOR_COMPLEX	0.046289	Med18
GO_OXIDOREDUCTASE_ACTIVITY_ACTING_ON_DIPHENOLS_AND_RELATED_SUBSTANCES_AS_DONORS	0.0468538	Uqcrfs1
GO_POSITIVE_REGULATION_OF_LIGASE_ACTIVITY	0.0468868	Mid1ip1
GO_TUBULIN_COMPLEX_ASSEMBLY	0.0468912	Tbcc
GO_MICROTUBULE_SEVERING	0.0472065	Fignl1
GO_UNCONVENTIONAL_MYOSIN_COMPLEX	0.0472617	Dynll2
GO_ORGANELLAR_LARGE_RIBOSOMAL_SUBUNIT	0.047436	Mrpl50;Mrpl14
GO_REGULATION_OF_PHOSPHOLIPID_BIOSYNTHETIC_PROCESS	0.0474627	Rab38
GO_REGULATION_OF_MICROTUBULE_MOTOR_ACTIVITY	0.0475278	Dynll2
GO_SMALL_RNA_LOADING_ONTO_RISC	0.0477434	Clp1
GO_NEUROTROPHIN_RECEPTOR_BINDING	0.0485372	Ngf
GO_REGULATION_OF_OOGENESIS	0.0487335	Ythdf2
GO_PROTON_TRANSPORTING_TWO_SECTOR_ATPASE_COMPLEX_ASSEMBLY	0.0489776	Tmem70

## Sheet: HF WNThi
GO terms enriched	p value	Genes enriched
GO_ENDONUCLEASE_COMPLEX	2.6654e-05	Pop7;Rpp38;Clp1;Trmt10c
GO_RIBONUCLEASE_P_COMPLEX	5.2946e-05	Pop7;Rpp38;Trmt10c
GO_TRNA_5_END_PROCESSING	0.000110373	Pop7;Rpp38;Trmt10c
GO_RNA_5_END_PROCESSING	0.000265912	Pop7;Rpp38;Trmt10c
GO_POSTTRANSLATIONAL_PROTEIN_TARGETING_TO_MEMBRANE_TRANSLOCATION	0.000396712	Hspa5;Sec62
GO_REGULATION_OF_CYTOPLASMIC_TRANSLATIONAL_INITIATION	0.000417122	Nck1;Ythdf2
GO_CAP_INDEPENDENT_TRANSLATIONAL_INITIATION	0.00041959	Nck1;Ythdf2
GO_ENDORIBONUCLEASE_ACTIVITY_PRODUCING_5_PHOSPHOMONOESTERS	0.00065405	Pop7;Rpp38;Fen1
GO_NUCLEOLAR_RIBONUCLEASE_P_COMPLEX	0.000873989	Pop7;Rpp38
GO_DNA_TEMPLATED_TRANSCRIPTION_TERMINATION	0.000938884	Clp1;Polr2l;Med18;Lsm10
GO_POSITIVE_REGULATION_OF_CYTOPLASMIC_TRANSLATION	0.00112229	Nck1;Ythdf2
GO_TERMINATION_OF_RNA_POLYMERASE_II_TRANSCRIPTION	0.00114414	Clp1;Med18;Lsm10
GO_POSITIVE_REGULATION_OF_INTERLEUKIN_8_SECRETION	0.00153939	F2rl1;Hyal2
GO_ENDONUCLEASE_ACTIVITY_ACTIVE_WITH_EITHER_RIBO_OR_DEOXYRIBONUCLEIC_ACIDS_AND_PRODUCING_5_PHOSPHOMONOESTERS	0.00157629	Pop7;Rpp38;Fen1
GO_NEGATIVE_REGULATION_OF_ENDOPLASMIC_RETICULUM_UNFOLDED_PROTEIN_RESPONSE	0.00167785	Hspa5;Nck1
GO_REGULATION_OF_PERK_MEDIATED_UNFOLDED_PROTEIN_RESPONSE	0.00175708	Hspa5;Nck1
GO_MULTIMERIC_RIBONUCLEASE_P_COMPLEX	0.00180421	Pop7;Rpp38
GO_RIBONUCLEASE_P_ACTIVITY	0.00180421	Pop7;Rpp38
GO_POSTTRANSLATIONAL_PROTEIN_TARGETING_TO_ENDOPLASMIC_RETICULUM_MEMBRANE	0.00181807	Hspa5;Sec62
GO_RIBONUCLEOPROTEIN_COMPLEX	0.00202917	Pop7;Rpp38;Ckap4;Nck1;Ythdf2;Mrpl50;Trmt10c;Imp3;Utp3;Mrps12;Mrpl14;Lsm10
GO_TRNA_5_LEADER_REMOVAL	0.00220152	Pop7;Rpp38
GO_MITOCHONDRIAL_PROTEIN_COMPLEX	0.00258077	Ndufaf1;Mrpl50;Trmt10c;Mrps12;Mrpl14;Uqcrfs1
GO_NEGATIVE_REGULATION_OF_VIRAL_RELEASE_FROM_HOST_CELL	0.00268337	Trim13;Trim11
GO_INTERLEUKIN_8_SECRETION	0.00326881	F2rl1;Hyal2
GO_RECEPTOR_TYROSINE_KINASE_BINDING	0.00378917	Tob1;Nck1;Hyal2
GO_ENDORIBONUCLEASE_ACTIVITY	0.00385796	Pop7;Rpp38;Fen1
GO_TRNA_SPECIFIC_RIBONUCLEASE_ACTIVITY	0.00410602	Pop7;Rpp38
GO_ENVELOPE	0.00424936	Spin1;Ndufaf4;Nxt1;Ndufaf1;Mrpl50;Tmem70;Mrps12;Rbm15;Mrpl14;Coa7;Uqcrfs1;Tmem11;Mad2l1bp
GO_ORGANELLE_INNER_MEMBRANE	0.00442051	Ndufaf4;Ndufaf1;Mrpl50;Tmem70;Mrps12;Mrpl14;Uqcrfs1;Tmem11
GO_NEGATIVE_REGULATION_OF_VIRAL_TRANSCRIPTION	0.00492465	Trim13;Trim11
GO_REGULATION_OF_VIRAL_TRANSCRIPTION	0.00501248	Trim13;Polr2l;Trim11
GO_PERK_MEDIATED_UNFOLDED_PROTEIN_RESPONSE	0.00580531	Hspa5;Nck1
GO_TRNA_PROCESSING	0.00588069	Pop7;Rpp38;Clp1;Trmt10c
GO_PROTEIN_TYROSINE_KINASE_BINDING	0.00625484	Tob1;Nck1;Hyal2
GO_RNA_PHOSPHODIESTER_BOND_HYDROLYSIS_ENDONUCLEOLYTIC	0.00702645	Pop7;Rpp38;Fen1
GO_POSITIVE_REGULATION_OF_INTERLEUKIN_6_SECRETION	0.00708108	F2rl1;Hyal2
GO_REGULATION_OF_CYTOPLASMIC_TRANSLATION	0.00816728	Nck1;Ythdf2
GO_BRANCHING_INVOLVED_IN_BLOOD_VESSEL_MORPHOGENESIS	0.00818708	Fkbpl;Rbm15
GO_POSITIVE_REGULATION_OF_TRANSLATIONAL_INITIATION	0.00877707	Nck1;Ythdf2
GO_REGULATION_OF_ENDOPLASMIC_RETICULUM_UNFOLDED_PROTEIN_RESPONSE	0.00966064	Hspa5;Nck1
GO_MITOCHONDRIAL_TRANSLATION	0.00974606	Mrpl50;Trmt10c;Mrps12;Mrpl14
GO_INTERLEUKIN_6_SECRETION	0.00988785	F2rl1;Hyal2
GO_RNA_METABOLIC_PROCESS	0.0105454	Pop7;Rpp38;Clp1;Fen1;Polr2l;Trmt10c;Imp3;Utp3;Rbm15;Son;Gemin7;Lsm10
GO_THROMBIN_ACTIVATED_RECEPTOR_ACTIVITY	0.0106026	F2rl1
GO_MITOCHONDRIAL_ENVELOPE	0.0108087	Ndufaf4;Ndufaf1;Mrpl50;Tmem70;Mrps12;Mrpl14;Coa7;Uqcrfs1;Tmem11
GO_REGULATION_OF_NEUTROPHIL_MEDIATED_CYTOTOXICITY	0.0108873	F2rl1
GO_NEUTROPHIL_MEDIATED_KILLING_OF_GRAM_NEGATIVE_BACTERIUM	0.0120969	F2rl1
GO_NEUTROPHIL_MEDIATED_KILLING_OF_SYMBIONT_CELL	0.0120969	F2rl1
GO_MODIFICATION_OF_MORPHOLOGY_OR_PHYSIOLOGY_OF_OTHER_ORGANISM_INVOLVED_IN_SYMBIOTIC_INTERACTION	0.0123125	Rraga;F2rl1;Hyal2
GO_CYTOPLASMIC_TRANSLATIONAL_INITIATION	0.0129784	Nck1;Ythdf2
GO_MOVEMENT_IN_ENVIRONMENT_OF_OTHER_ORGANISM_INVOLVED_IN_SYMBIOTIC_INTERACTION	0.0135422	Trim13;Trim11
GO_MITOCHONDRIAL_PART	0.0139798	Ndufaf4;Ndufaf1;Mrpl50;Trmt10c;Tmem70;Mrps12;Mrpl14;Coa7;Tst;Uqcrfs1;Tmem11
GO_POSITIVE_REGULATION_OF_INTERLEUKIN_8_PRODUCTION	0.0141263	F2rl1;Hyal2
GO_RAC_PROTEIN_SIGNAL_TRANSDUCTION	0.0141708	Arf6;Rhog
GO_INTERACTION_WITH_HOST	0.015122	Trim13;Rraga;Trim11;Hyal2
GO_RENIN_SECRETION_INTO_BLOOD_STREAM	0.015444	F2rl1
GO_MITOCHONDRIAL_GENE_EXPRESSION	0.0156013	Mrpl50;Trmt10c;Mrps12;Mrpl14
GO_REGULATION_OF_SYMBIOSIS_ENCOMPASSING_MUTUALISM_THROUGH_PARASITISM	0.0159312	Trim13;F2rl1;Polr2l;Trim11
GO_SMALL_SUBUNIT_PROCESSOME	0.016294	Imp3;Utp3
GO_NCRNA_PROCESSING	0.0165037	Pop7;Rpp38;Clp1;Trmt10c;Imp3;Utp3
GO_ORGANELLAR_RIBOSOME	0.0170076	Mrpl50;Mrps12;Mrpl14
GO_NEGATIVE_REGULATION_OF_PROTEIN_KINASE_B_SIGNALING	0.0171881	Phlda3;Hyal2
GO_RIBONUCLEASE_ACTIVITY	0.0174895	Pop7;Rpp38;Fen1
GO_NEUTROPHIL_MEDIATED_CYTOTOXICITY	0.0175277	F2rl1
GO_MODIFICATION_BY_SYMBIONT_OF_HOST_MORPHOLOGY_OR_PHYSIOLOGY	0.0175567	Rraga;Hyal2
GO_NUCLEOLAR_PART	0.0178954	Pop7;Rpp38;Polr2l;Imp3
GO_MODIFICATION_OF_MORPHOLOGY_OR_PHYSIOLOGY_OF_OTHER_ORGANISM	0.0179924	Rraga;F2rl1;Hyal2
GO_TRNA_ADENINE_METHYLTRANSFERASE_ACTIVITY	0.018065	Trmt10c
GO_TRNA_METABOLIC_PROCESS	0.0185404	Pop7;Rpp38;Clp1;Trmt10c
GO_MITOCHONDRIAL_TRNA_METHYLATION	0.018544	Trmt10c
GO_CEREBELLAR_CORTEX_DEVELOPMENT	0.0186452	Clp1;Hspa5
GO_MITOCHONDRIAL_TRANSLATIONAL_TERMINATION	0.0188854	Mrpl50;Mrps12;Mrpl14
GO_MITOCHONDRION	0.0195002	Fam210a;Fen1;Ndufaf4;Hspa5;Ndufaf1;Mrpl50;Trmt10c;Tmem70;Mrps12;Mrpl14;Coa7;Tst;Uqcrfs1;Tmem11
GO_MITOCHONDRIAL_PROTON_TRANSPORTING_ATP_SYNTHASE_COMPLEX_ASSEMBLY	0.0195847	Tmem70
GO_NCRNA_TRANSCRIPTION	0.0202418	Spin1;Phax;Polr2l
GO_PEPTIDE_RECEPTOR_ACTIVITY	0.021927	F2rl1;Ogfrl1
GO_RUFFLE_ASSEMBLY	0.0220476	Arf6;Rhog
GO_EOSINOPHIL_ACTIVATION	0.0225306	F2rl1
GO_ENDONUCLEASE_ACTIVITY	0.0228376	Pop7;Rpp38;Fen1
GO_OPIOID_RECEPTOR_ACTIVITY	0.0234186	Ogfrl1
GO_HYALURONONGLUCOSAMINIDASE_ACTIVITY	0.0238541	Hyal2
GO_NEGATIVE_REGULATION_OF_RESPONSE_TO_ENDOPLASMIC_RETICULUM_STRESS	0.0243486	Hspa5;Nck1
GO_EGO_COMPLEX	0.0244424	Rraga
GO_MITOCHONDRIAL_MEMBRANE_PART	0.0247597	Ndufaf1;Tmem70;Uqcrfs1;Tmem11
GO_REGULATION_OF_MULTI_ORGANISM_PROCESS	0.0249	Trim13;F2rl1;Ythdf2;Polr2l;Trim11
GO_RNA_IMPORT_INTO_MITOCHONDRION	0.0249521	Tst
GO_MULTI_ORGANISM_MEMBRANE_FUSION	0.0252109	Hyal2
GO_DISRUPTION_BY_HOST_OF_SYMBIONT_CELLS	0.0253128	F2rl1
GO_POSITIVE_REGULATION_OF_CELL_CYCLE_G1_S_PHASE_TRANSITION	0.0258227	Fam83d;Lsm10
GO_POSITIVE_REGULATION_OF_CYTOLYSIS	0.026058	Rraga
GO_PROTON_TRANSPORTING_ATP_SYNTHASE_COMPLEX_ASSEMBLY	0.0261593	Tmem70
GO_SH3_SH2_ADAPTOR_ACTIVITY	0.0263384	Tob1;Nck1
GO_TETRAPYRROLE_CATABOLIC_PROCESS	0.026376	Hmox2
GO_TRANSLATIONAL_TERMINATION	0.0264897	Mrpl50;Mrps12;Mrpl14
GO_CELLULAR_COMPONENT_MAINTENANCE	0.0267462	F2rl1;Arf6
GO_INTERLEUKIN_8_PRODUCTION	0.0268169	F2rl1;Hyal2
GO_ENDOPLASMIC_RETICULUM	0.0268869	Trim13;Ckap4;Prss23;Dse;Hmox2;Hspa5;B3gnt8;Rhog;Nck1;Atg101;Sec62;Plekhf2;Hyal2;Tmem203
GO_ACETYLGLUCOSAMINYLTRANSFERASE_ACTIVITY	0.0269462	B3gnt8;Mgat2
GO_ER_NUCLEUS_SIGNALING_PATHWAY	0.0274553	Hspa5;Nck1
GO_POSITIVE_REGULATION_OF_MRNA_CATABOLIC_PROCESS	0.0277461	Tob1;Ythdf2
GO_POSITIVE_REGULATION_OF_TOLL_LIKE_RECEPTOR_2_SIGNALING_PATHWAY	0.0287113	F2rl1
GO_CELLULAR_PROTEIN_COMPLEX_DISASSEMBLY	0.0294754	F2rl1;Mrpl50;Mrps12;Mrpl14
GO_RENAL_WATER_TRANSPORT	0.0295499	Hyal2
GO_POSITIVE_REGULATION_OF_TOLL_LIKE_RECEPTOR_4_SIGNALING_PATHWAY	0.0295897	F2rl1
GO_RUFFLE_ORGANIZATION	0.0296141	Arf6;Rhog
GO_INTERLEUKIN_10_SECRETION	0.0297652	F2rl1
GO_STRESS_RESPONSE_TO_METAL_ION	0.0301359	Hspa5
GO_CATALYTIC_ACTIVITY_ACTING_ON_A_TRNA	0.0302169	Pop7;Rpp38;Trmt10c
GO_MONOCYTE_ACTIVATION	0.0302963	Hyal2
GO_CHEMOKINE_C_C_MOTIF_LIGAND_2_SECRETION	0.0304269	F2rl1
GO_RNA_SPLICING	0.0304721	Clp1;Polr2l;Rbm15;Son;Gemin7;Lsm10
GO_NEGATIVE_REGULATION_OF_PERK_MEDIATED_UNFOLDED_PROTEIN_RESPONSE	0.0304738	Nck1
GO_RESPONSE_TO_NERVE_GROWTH_FACTOR	0.0306518	Hspa5;Arf6
GO_TOXIC_SUBSTANCE_BINDING	0.0307825	Phax
GO_MULTICELLULAR_ORGANISMAL_IRON_ION_HOMEOSTASIS	0.0309115	Hyal2
GO_PORPHYRIN_CONTAINING_COMPOUND_METABOLIC_PROCESS	0.0312336	Hmox2
GO_MITOCHONDRIAL_RNA_3_END_PROCESSING	0.0312701	Trmt10c
GO_RNA_POLYMERASE_III_TYPE_3_PROMOTER_DNA_BINDING	0.0315429	Brf2
GO_GATOR1_COMPLEX	0.0326605	Rraga
GO_TRANSCRIPTION_FACTOR_TFIIIB_COMPLEX	0.0329994	Brf2
GO_MAINTENANCE_OF_POSTSYNAPTIC_SPECIALIZATION_STRUCTURE	0.0334093	Arf6
GO_STORE_OPERATED_CALCIUM_CHANNEL_ACTIVITY	0.0337516	Orai1
GO_EIF2ALPHA_PHOSPHORYLATION_IN_RESPONSE_TO_ENDOPLASMIC_RETICULUM_STRESS	0.0342404	Nck1
GO_POSITIVE_REGULATION_OF_PROTEIN_LOCALIZATION_TO_CELL_PERIPHERY	0.0345956	Arf6;Rhog
GO_OPIOID_RECEPTOR_SIGNALING_PATHWAY	0.0350855	Ogfrl1
GO_NEURAL_FOLD_FORMATION	0.0352823	Luzp1
GO_POSITIVE_REGULATION_OF_TRANSLATION_IN_RESPONSE_TO_STRESS	0.0353079	Nck1
GO_N_ACETYLLACTOSAMINIDE_BETA_1_3_N_ACETYLGLUCOSAMINYLTRANSFERASE_ACTIVITY	0.0355414	B3gnt8
GO_NCRNA_METABOLIC_PROCESS	0.0360141	Pop7;Rpp38;Clp1;Trmt10c;Imp3;Utp3
GO_TRANSCRIPTION_BY_RNA_POLYMERASE_III	0.0362166	Polr2l;Brf2
GO_INTRACELLULAR_PROTEIN_TRANSMEMBRANE_TRANSPORT	0.0364011	Hspa5;Sec62
GO_POSITIVE_REGULATION_OF_TOLL_LIKE_RECEPTOR_3_SIGNALING_PATHWAY	0.0364434	F2rl1
GO_NEGATIVE_REGULATION_OF_FIBROBLAST_MIGRATION	0.0364899	Hyal2
GO_POSITIVE_REGULATION_OF_INTERLEUKIN_6_PRODUCTION	0.0365008	F2rl1;Hyal2
GO_RESPONSE_TO_GAMMA_RADIATION	0.0365402	Trim13;Hspa5
GO_SIGNAL_COMPLEX_ASSEMBLY	0.0365981	Nck1
GO_POSITIVE_REGULATION_OF_CELLULAR_AMIDE_METABOLIC_PROCESS	0.0369016	Nck1;Ythdf2;Trmt10c
GO_RS_DOMAIN_BINDING	0.0370708	Son
GO_POSITIVE_REGULATION_OF_KILLING_OF_CELLS_OF_OTHER_ORGANISM	0.0375555	F2rl1
GO_RRNA_TRANSPORT	0.0376173	Tst
GO_ANCHORED_COMPONENT_OF_EXTERNAL_SIDE_OF_PLASMA_MEMBRANE	0.0376848	Hyal2
GO_POSITIVE_REGULATION_OF_ADENYLATE_CYCLASE_ACTIVITY	0.0377561	Orai1
GO_CAJAL_BODY	0.0380227	Phax;Lsm10
GO_MRNA_EDITING_COMPLEX	0.0380972	Rbm15
GO_RNA_DNA_HYBRID_RIBONUCLEASE_ACTIVITY	0.0383883	Fen1
GO_REGULATION_OF_OOCYTE_MATURATION	0.0386276	Ythdf2
GO_REGULATION_OF_SYSTEMIC_ARTERIAL_BLOOD_PRESSURE_BY_CIRCULATORY_RENIN_ANGIOTENSIN	0.0390051	F2rl1
GO_MANGANESE_ION_BINDING	0.0390402	Fen1;Mgat2
GO_REGULATION_OF_GLOMERULAR_FILTRATION	0.0390663	F2rl1
GO_RIBONUCLEASE_MRP_COMPLEX	0.0392654	Pop7
GO_IMPORT_INTO_NUCLEUS	0.0395799	Nxt1;Gemin7;Hyal2
GO_N6_METHYLADENOSINE_CONTAINING_RNA_BINDING	0.0397221	Ythdf2
GO_METHYLATED_HISTONE_BINDING	0.0398847	Spin1;Cbx2
GO_REGULATION_OF_TOLL_LIKE_RECEPTOR_2_SIGNALING_PATHWAY	0.0399572	F2rl1
GO_CATALYTIC_ACTIVITY_ACTING_ON_RNA	0.0401345	Pop7;Rpp38;Fen1;Polr2l;Trmt10c
GO_WATER_TRANSPORT	0.0405387	Hyal2
GO_RNA_PHOSPHODIESTER_BOND_HYDROLYSIS	0.0405659	Pop7;Rpp38;Fen1
GO_POSITIVE_REGULATION_OF_DEFENSE_RESPONSE_TO_BACTERIUM	0.0414572	F2rl1
GO_SUBSTRATE_DEPENDENT_CELL_MIGRATION_CELL_EXTENSION	0.0417618	Nck1
GO_POLY_N_ACETYLLACTOSAMINE_BIOSYNTHETIC_PROCESS	0.0420191	B3gnt8
GO_VENTRICULAR_SEPTUM_DEVELOPMENT	0.0420275	Rbm15;Luzp1
GO_POSITIVE_REGULATION_OF_ACTIN_FILAMENT_DEPOLYMERIZATION	0.0422573	F2rl1
GO_G_PROTEIN_BETA_SUBUNIT_BINDING	0.0425502	F2rl1
GO_RNA_SPLICING_VIA_TRANSESTERIFICATION_REACTIONS	0.0428539	Clp1;Polr2l;Rbm15;Son;Gemin7
GO_LUTEOLYSIS	0.0429916	Hspa5
GO_INTERFERON_GAMMA_SECRETION	0.0430511	F2rl1
GO_POSITIVE_REGULATION_OF_CYTOKINE_SECRETION_INVOLVED_IN_IMMUNE_RESPONSE	0.0430868	F2rl1
GO_REGULATION_OF_KILLING_OF_CELLS_OF_OTHER_ORGANISM	0.0431008	F2rl1
GO_DISRUPTION_OF_CELLS_OF_OTHER_ORGANISM_INVOLVED_IN_SYMBIOTIC_INTERACTION	0.0433243	F2rl1
GO_MITOCHONDRIAL_RNA_MODIFICATION	0.0436645	Trmt10c
GO_NUCLEAR_PORE_CENTRAL_TRANSPORT_CHANNEL	0.0439178	Nxt1
GO_TRANSLATIONAL_ELONGATION	0.0439856	Mrpl50;Mrps12;Mrpl14
GO_POSITIVE_REGULATION_OF_VIRAL_ENTRY_INTO_HOST_CELL	0.0441047	Trim11
GO_MULTI_ORGANISM_MEMBRANE_ORGANIZATION	0.0443307	Hyal2
GO_U7_SNRNP	0.0443509	Lsm10
GO_THROMBIN_ACTIVATED_RECEPTOR_SIGNALING_PATHWAY	0.0445947	F2rl1
GO_REGULATION_OF_CYTOLYSIS	0.0446248	Rraga
GO_REGULATION_OF_TRANSLATION_IN_RESPONSE_TO_ENDOPLASMIC_RETICULUM_STRESS	0.0447822	Nck1
GO_RENAL_SYSTEM_PROCESS_INVOLVED_IN_REGULATION_OF_BLOOD_VOLUME	0.0450666	F2rl1
GO_NEGATIVE_REGULATION_OF_VIRAL_PROCESS	0.0451816	Trim13;Trim11
GO_POSITIVE_REGULATION_OF_PHAGOCYTOSIS_ENGULFMENT	0.0453317	F2rl1
GO_TUBULIN_COMPLEX_ASSEMBLY	0.0457562	Tbcc
GO_RIBOSOME	0.0457675	Nck1;Mrpl50;Mrps12;Mrpl14
GO_SPECIFIC_GRANULE_MEMBRANE	0.0458817	Ckap4;Hmox2
GO_OXIDOREDUCTASE_ACTIVITY_ACTING_ON_DIPHENOLS_AND_RELATED_SUBSTANCES_AS_DONORS	0.045887	Uqcrfs1
GO_RNA_POLYMERASE_III_PREINITIATION_COMPLEX_ASSEMBLY	0.0458894	Brf2
GO_POSITIVE_REGULATION_OF_SISTER_CHROMATID_COHESION	0.0463133	Fen1
GO_FLAP_ENDONUCLEASE_ACTIVITY	0.0467611	Fen1
GO_PROTEIN_TRANSMEMBRANE_TRANSPORT	0.0467745	Hspa5;Sec62
GO_REGULATION_OF_TOLL_LIKE_RECEPTOR_3_SIGNALING_PATHWAY	0.0471017	F2rl1
GO_ORGANELLAR_LARGE_RIBOSOMAL_SUBUNIT	0.047152	Mrpl50;Mrpl14
GO_TRNA_3_END_PROCESSING	0.0474242	Trmt10c
GO_REGULATION_OF_CELL_PROJECTION_ASSEMBLY	0.0476178	F2rl1;Arf6;Rhog
GO_RNA_BINDING	0.0476594	Pop7;Ckap4;Pprc1;Ythdf2;Phax;Trmt10c;Imp3;Utp3;Mrps12;Rbm15;Mrpl14;Son;Tst;Lsm10
GO_NADH_DEHYDROGENASE_COMPLEX_ASSEMBLY	0.0477815	Ndufaf4;Ndufaf1
GO_INTRINSIC_COMPONENT_OF_EXTERNAL_SIDE_OF_PLASMA_MEMBRANE	0.0490165	Hyal2
GO_CORE_MEDIATOR_COMPLEX	0.0490785	Med18
GO_REGULATION_OF_MICROTUBULE_MOTOR_ACTIVITY	0.0490956	Dynll2
GO_UNCONVENTIONAL_MYOSIN_COMPLEX	0.0492456	Dynll2
GO_REGULATION_OF_OOGENESIS	0.0497275	Ythdf2
GO_PROTON_TRANSPORTING_TWO_SECTOR_ATPASE_COMPLEX_ASSEMBLY	0.0498059	Tmem70

## Sheet: HF WNTlo
GO terms enriched	p value	Genes enriched
GO_ENDORIBONUCLEASE_ACTIVITY_PRODUCING_5_PHOSPHOMONOESTERS	6.84623e-05	Pop7;Rpp38;Fen1;Mrpl44
GO_ENDONUCLEASE_ACTIVITY_ACTIVE_WITH_EITHER_RIBO_OR_DEOXYRIBONUCLEIC_ACIDS_AND_PRODUCING_5_PHOSPHOMONOESTERS	0.000230392	Pop7;Rpp38;Fen1;Mrpl44
GO_CAP_INDEPENDENT_TRANSLATIONAL_INITIATION	0.000690858	Nck1;Ythdf2
GO_REGULATION_OF_CYTOPLASMIC_TRANSLATIONAL_INITIATION	0.000690864	Nck1;Ythdf2
GO_ENDORIBONUCLEASE_ACTIVITY	0.000756293	Pop7;Rpp38;Fen1;Mrpl44
GO_NUCLEOLAR_RIBONUCLEASE_P_COMPLEX	0.00146657	Pop7;Rpp38
GO_ENDONUCLEASE_COMPLEX	0.00154659	Pop7;Rpp38;Clp1
GO_MITOCHONDRIAL_GENE_EXPRESSION	0.00156431	Mrps2;Trmt5;Mrps12;Mrpl14;Mrpl44;Tefm
GO_RESPONSE_TO_RADIATION	0.00157214	Sde2;Fen1;Hoxa1;Fkbpl;Fignl1;Aen;Rbm4b;Bhlhe40;Hyal2
GO_RNA_PHOSPHODIESTER_BOND_HYDROLYSIS_ENDONUCLEOLYTIC	0.0016978	Pop7;Rpp38;Fen1;Mrpl44
GO_POSITIVE_REGULATION_OF_CYTOPLASMIC_TRANSLATION	0.00186477	Nck1;Ythdf2
GO_TERMINATION_OF_RNA_POLYMERASE_II_TRANSCRIPTION	0.00246764	Clp1;Med18;Lsm10
GO_TRNA_PROCESSING	0.00249874	Pop7;Rpp38;Clp1;Trmt5;Lcmt2
GO_DNA_TEMPLATED_TRANSCRIPTION_TERMINATION	0.00252442	Clp1;Polr2l;Med18;Lsm10
GO_RIBONUCLEOPROTEIN_COMPLEX	0.00279753	Pop7;Rpp38;Ckap4;Naa30;Nck1;Mrps2;Ythdf2;Imp3;Tnrc6c;Mrps12;Mrpl14;Mrpl44;Tefm;Lsm10
GO_RNA_METABOLIC_PROCESS	0.00286954	Pop7;Rpp38;Clp1;Fen1;Polr2l;Shq1;Imp3;Ddx24;Trmt5;Rbm15;Mrpl44;Son;Gemin7;Rbm4b;Lsm10;Lcmt2
GO_MULTIMERIC_RIBONUCLEASE_P_COMPLEX	0.0030247	Pop7;Rpp38
GO_RIBONUCLEASE_P_ACTIVITY	0.0030247	Pop7;Rpp38
GO_CATALYTIC_ACTIVITY_ACTING_ON_RNA	0.00324444	Pop7;Rpp38;Fen1;Polr2l;Ddx24;Trmt5;Mrpl44;Lcmt2
GO_TRNA_5_LEADER_REMOVAL	0.00367386	Pop7;Rpp38
GO_NEGATIVE_REGULATION_OF_B_CELL_APOPTOTIC_PROCESS	0.00409986	Irs2;Bcl10
GO_RIBONUCLEASE_P_COMPLEX	0.00431484	Pop7;Rpp38
GO_NCRNA_PROCESSING	0.00530112	Pop7;Rpp38;Clp1;Shq1;Imp3;Trmt5;Mrpl44;Lcmt2
GO_ORGANELLAR_RIBOSOME	0.00539121	Mrps2;Mrps12;Mrpl14;Mrpl44
GO_RNA_INTERFERENCE	0.0055801	Clp1;Mrpl44
GO_RIBONUCLEASE_ACTIVITY	0.00581016	Pop7;Rpp38;Fen1;Mrpl44
GO_REGULATION_OF_CELL_MATURATION	0.00621844	Ythdf2;Bcl11a
GO_MITOCHONDRIAL_TRANSLATIONAL_TERMINATION	0.00623802	Mrps2;Mrps12;Mrpl14;Mrpl44
GO_TRNA_5_END_PROCESSING	0.00680491	Pop7;Rpp38
GO_TRNA_SPECIFIC_RIBONUCLEASE_ACTIVITY	0.00686613	Pop7;Rpp38
GO_REGULATION_OF_B_CELL_APOPTOTIC_PROCESS	0.00713197	Irs2;Bcl10
GO_ENDONUCLEASE_ACTIVITY	0.00822739	Pop7;Rpp38;Fen1;Mrpl44
GO_CRANIAL_SKELETAL_SYSTEM_DEVELOPMENT	0.00833008	Foxn3;Hoxa1;Hoxa2
GO_RESPONSE_TO_LIGHT_STIMULUS	0.00933136	Sde2;Fen1;Hoxa1;Rbm4b;Bhlhe40;Hyal2
GO_MITOCHONDRIAL_PROTEIN_COMPLEX	0.00934277	Ndufaf1;Mrps2;Mrps12;Mrpl14;Mrpl44;Uqcrfs1
GO_NUCLEASE_ACTIVITY	0.00944294	Pop7;Rpp38;Fen1;Aen;Mrpl44
GO_ENTRAINMENT_OF_CIRCADIAN_CLOCK_BY_PHOTOPERIOD	0.00945295	Rbm4b;Bhlhe40
GO_TRANSLATIONAL_TERMINATION	0.00987307	Mrps2;Mrps12;Mrpl14;Mrpl44
GO_NEGATIVE_REGULATION_OF_DENDRITE_DEVELOPMENT	0.0099023	Arf6;Bcl11a
GO_CELLULAR_DEFENSE_RESPONSE	0.0100873	Adora2b;Bcl10
GO_SPECIFIC_GRANULE_MEMBRANE	0.0101617	Ckap4;Hmox2;Degs1
GO_TRNA_METABOLIC_PROCESS	0.0103577	Pop7;Rpp38;Clp1;Trmt5;Lcmt2
GO_PHOTOPERIODISM	0.0115398	Rbm4b;Bhlhe40
GO_CATALYTIC_ACTIVITY_ACTING_ON_A_TRNA	0.0118804	Pop7;Rpp38;Trmt5;Lcmt2
GO_RNA_5_END_PROCESSING	0.0119059	Pop7;Rpp38
GO_NUCLEAR_BODY	0.0119708	Topors;Ckap4;Nxt1;Phax;Mapk7;Rbm15;Son;Gemin7;Rbm4b;Lsm10;Bhlhe40
GO_B_CELL_APOPTOTIC_PROCESS	0.0134634	Irs2;Bcl10
GO_REGULATION_OF_CYTOPLASMIC_TRANSLATION	0.0138215	Nck1;Ythdf2
GO_ENTRAINMENT_OF_CIRCADIAN_CLOCK	0.0140746	Rbm4b;Bhlhe40
GO_BRANCHING_INVOLVED_IN_BLOOD_VESSEL_MORPHOGENESIS	0.0142842	Fkbpl;Rbm15
GO_POSITIVE_REGULATION_OF_TRANSLATIONAL_INITIATION	0.0147278	Nck1;Ythdf2
GO_RNA_METHYLATION	0.0148183	Trmt5;Rbm15;Lcmt2
GO_PHOTORECEPTOR_CONNECTING_CILIUM	0.0148192	Topors;Tbcc
GO_NUCLEOPLASM_PART	0.0149767	Topors;Ckap4;Clp1;Nxt1;Phax;Polr2l;Med18;Mapk7;Rbm15;Son;Gemin7;Rbm4b;Lsm10;Bhlhe40
GO_NCRNA_METABOLIC_PROCESS	0.0150247	Pop7;Rpp38;Clp1;Shq1;Imp3;Trmt5;Mrpl44;Lcmt2
GO_EMBRYONIC_MORPHOGENESIS	0.0153597	Gjb6;Kdf1;Hoxa1;Hoxa2;Ythdf2;Mapk7;Luzp1;Bcl10
GO_MITOCHONDRIAL_MATRIX	0.0167361	Mrps2;Trmt5;Mrps12;Mrpl14;Mrpl44;Tst;Tefm;Fahd1
GO_NEGATIVE_REGULATION_OF_LYMPHOCYTE_APOPTOTIC_PROCESS	0.0171194	Irs2;Bcl10
GO_RNA_PHOSPHODIESTER_BOND_HYDROLYSIS	0.0177779	Pop7;Rpp38;Fen1;Mrpl44
GO_MITOCHONDRIAL_PART	0.0179687	Ndufaf1;Mrps2;Tmem70;Trmt5;Mrps12;Mrpl14;Mrpl44;Coa7;Tst;Uqcrfs1;Tefm;Fahd1;Tmem11
GO_TRANSLATIONAL_ELONGATION	0.0193605	Mrps2;Mrps12;Mrpl14;Mrpl44
GO_CARBOXY_LYASE_ACTIVITY	0.0205421	Umps;Fahd1
GO_ORGANELLE_INNER_MEMBRANE	0.020728	Ndufaf1;Mrps2;Tmem70;Mrps12;Mrpl14;Mrpl44;Uqcrfs1;Tmem11
GO_EAR_MORPHOGENESIS	0.021183	Gjb6;Hoxa1;Hoxa2
GO_CYTOPLASMIC_TRANSLATIONAL_INITIATION	0.0213171	Nck1;Ythdf2
GO_TRNA_METHYLTRANSFERASE_ACTIVITY	0.0215938	Trmt5;Lcmt2
GO_G_PROTEIN_COUPLED_ADENOSINE_RECEPTOR_ACTIVITY	0.0223842	Adora2b
GO_CRANIAL_NERVE_FORMATION	0.0229237	Hoxa1
GO_REGULATION_OF_BRANCHING_MORPHOGENESIS_OF_A_NERVE	0.0230949	Bcl11a
GO_ORGANELLAR_SMALL_RIBOSOMAL_SUBUNIT	0.0233358	Mrps2;Mrps12
GO_MITOCHONDRIAL_TRANSLATION	0.0235192	Mrps2;Mrps12;Mrpl14;Mrpl44
GO_INTERLEUKIN_6_PRODUCTION	0.0237556	Adora2b;Hyal2;Bcl10
GO_POSITIVE_REGULATION_OF_HEMATOPOIETIC_STEM_CELL_PROLIFERATION	0.0238703	N4bp2l2
GO_POSITIVE_REGULATION_OF_INTERLEUKIN_8_PRODUCTION	0.0238912	Hyal2;Bcl10
GO_RAC_PROTEIN_SIGNAL_TRANSDUCTION	0.0239464	Arf6;Rhog
GO_MITOCHONDRIAL_TRNA_METHYLATION	0.0244849	Trmt5
GO_MITOCHONDRIAL_PROTON_TRANSPORTING_ATP_SYNTHASE_COMPLEX_ASSEMBLY	0.0249935	Tmem70
GO_POSITIVE_REGULATION_OF_INTERLEUKIN_8_BIOSYNTHETIC_PROCESS	0.0251798	Bcl10
GO_NEGATIVE_REGULATION_OF_LEUKOCYTE_APOPTOTIC_PROCESS	0.0267613	Irs2;Bcl10
GO_RESPONSE_TO_ABIOTIC_STIMULUS	0.0271909	Gjb6;Sde2;Fen1;Hmox2;Hoxa1;Malat1;Fkbpl;Fignl1;Aen;Rbm4b;Bhlhe40;Hyal2;Bcl10
GO_TRNA_METHYLATION	0.0279809	Trmt5;Lcmt2
GO_GLYCOSYL_COMPOUND_BIOSYNTHETIC_PROCESS	0.0283513	Umps;Lcmt2
GO_MODIFICATION_BY_SYMBIONT_OF_HOST_MORPHOLOGY_OR_PHYSIOLOGY	0.0293585	Rraga;Hyal2
GO_REGULATION_OF_MRNA_SPLICING_VIA_SPLICEOSOME	0.0294906	Rbm15;Son;Rbm4b
GO_LONG_CHAIN_FATTY_ACID_IMPORT_ACROSS_PLASMA_MEMBRANE	0.0310924	Irs2
GO_REGULATION_OF_LONG_CHAIN_FATTY_ACID_IMPORT_INTO_CELL	0.0310924	Irs2
GO_REGULATION_OF_MAST_CELL_CYTOKINE_PRODUCTION	0.0311394	Bcl10
GO_RIBOSOME	0.0311613	Nck1;Mrps2;Mrps12;Mrpl14;Mrpl44
GO_RELAXATION_OF_VASCULAR_SMOOTH_MUSCLE	0.0313219	Adora2b
GO_HYALURONONGLUCOSAMINIDASE_ACTIVITY	0.0314234	Hyal2
GO_NEGATIVE_REGULATION_OF_CELL_MATURATION	0.0315299	Bcl11a
GO_POSITIVE_REGULATION_OF_GUANYLATE_CYCLASE_ACTIVITY	0.0317144	Adora2b
GO_REGULATION_OF_GUANYLATE_CYCLASE_ACTIVITY	0.0317144	Adora2b
GO_REGULATION_OF_CHRONIC_INFLAMMATORY_RESPONSE	0.0318205	Adora2b
GO_CARDIAC_MUSCLE_MYOBLAST_PROLIFERATION	0.0319272	Malat1
GO_EGO_COMPLEX	0.03193	Rraga
GO_REGULATION_OF_HEMATOPOIETIC_STEM_CELL_PROLIFERATION	0.0323691	N4bp2l2
GO_RETINAL_CONE_CELL_DIFFERENTIATION	0.0323733	Topors
GO_RNA_IMPORT_INTO_MITOCHONDRION	0.0325837	Tst
GO_MULTI_ORGANISM_MEMBRANE_FUSION	0.0327403	Hyal2
GO_REGULATION_OF_MORPHOGENESIS_OF_A_BRANCHING_STRUCTURE	0.032978	Bcl11a;Fkbpl
GO_PROTON_TRANSPORTING_ATP_SYNTHASE_COMPLEX_ASSEMBLY	0.0335027	Tmem70
GO_POSITIVE_REGULATION_OF_CYTOLYSIS	0.033528	Rraga
GO_TETRAPYRROLE_CATABOLIC_PROCESS	0.0338316	Hmox2
GO_RNA_SPLICING	0.0350787	Clp1;Polr2l;Rbm15;Son;Gemin7;Rbm4b;Lsm10
GO_DNA_BINDING_TRANSCRIPTION_REPRESSOR_ACTIVITY_RNA_POLYMERASE_II_SPECIFIC	0.0354919	Hoxa2;Bcl11a;Tgif1;Bhlhe40
GO_REGULATION_OF_LYMPHOCYTE_APOPTOTIC_PROCESS	0.0357145	Irs2;Bcl10
GO_TRANSFERASE_ACTIVITY_TRANSFERRING_SULFUR_CONTAINING_GROUPS	0.0362443	Tst;Tpst2
GO_RUFFLE_ASSEMBLY	0.036475	Arf6;Rhog
GO_INTERACTION_WITH_HOST	0.0369621	Rraga;Trim59;Vps18;Hyal2
GO_EMBRYONIC_CRANIAL_SKELETON_MORPHOGENESIS	0.0372323	Hoxa1;Hoxa2
GO_GENE_SILENCING_BY_RNA	0.0375201	Clp1;Polr2l;Tnrc6c;Mrpl44
GO_ENVELOPE	0.0378143	Nxt1;Ndufaf1;Mrps2;Tmem70;Mrps12;Aen;Rbm15;Mrpl14;Mrpl44;Coa7;Uqcrfs1;Tmem11;Mad2l1bp
GO_SEMICIRCULAR_CANAL_MORPHOGENESIS	0.0379927	Hoxa1
GO_SENSORY_ORGAN_MORPHOGENESIS	0.038363	Topors;Gjb6;Hoxa1;Hoxa2
GO_INTRINSIC_APOPTOTIC_SIGNALING_PATHWAY_IN_RESPONSE_TO_DNA_DAMAGE_BY_P53_CLASS_MEDIATOR	0.0390003	Topors;Aen
GO_HEPARIN_BIOSYNTHETIC_PROCESS	0.039063	Glce
GO_RENAL_WATER_TRANSPORT	0.0390671	Hyal2
GO_NEGATIVE_REGULATION_OF_FATTY_ACID_TRANSPORT	0.0393252	Irs2
GO_RETINAL_ROD_CELL_DEVELOPMENT	0.0394251	Topors
GO_MONOCYTE_ACTIVATION	0.0395102	Hyal2
GO_RHOMBOMERE_DEVELOPMENT	0.0397619	Hoxa2
GO_TOXIC_SUBSTANCE_BINDING	0.03977	Phax
GO_RNA_SPLICING_VIA_TRANSESTERIFICATION_REACTIONS	0.0398126	Clp1;Polr2l;Rbm15;Son;Gemin7;Rbm4b
GO_NEGATIVE_REGULATION_OF_PERK_MEDIATED_UNFOLDED_PROTEIN_RESPONSE	0.0401333	Nck1
GO_DNA_TOPOISOMERASE_BINDING	0.0402782	Topors
GO_MULTICELLULAR_ORGANISMAL_IRON_ION_HOMEOSTASIS	0.0403378	Hyal2
GO_POSITIVE_REGULATION_OF_EXTRINSIC_APOPTOTIC_SIGNALING_PATHWAY	0.0403693	Hyal2;Bcl10
GO_PORPHYRIN_CONTAINING_COMPOUND_METABOLIC_PROCESS	0.0404356	Hmox2
GO_MITOCHONDRIAL_RIBOSOME_ASSEMBLY	0.0405036	Mrps2
GO_INTRINSIC_APOPTOTIC_SIGNALING_PATHWAY	0.0407148	Topors;Nck1;Mapk7;Fignl1;Aen
GO_NEGATIVE_REGULATION_OF_CYCLIC_NUCLEOTIDE_PHOSPHODIESTERASE_ACTIVITY	0.0407523	Mapk7
GO_DE_NOVO_PYRIMIDINE_NUCLEOBASE_BIOSYNTHETIC_PROCESS	0.0408986	Umps
GO_PROTEIN_BINDING_BRIDGING_INVOLVED_IN_SUBSTRATE_RECOGNITION_FOR_UBIQUITINATION	0.0409248	Spsb2
GO_RNA_POLYMERASE_III_TYPE_3_PROMOTER_DNA_BINDING	0.0410227	Brf2
GO_TOR_SIGNALING	0.0410401	Rraga;Fam83d;Tti1
GO_POSTTRANSLATIONAL_PROTEIN_TARGETING_TO_MEMBRANE_TRANSLOCATION	0.0414281	Sec62
GO_ENTRY_INTO_OTHER_ORGANISM_INVOLVED_IN_SYMBIOTIC_INTERACTION	0.0415049	Trim59;Vps18;Hyal2
GO_NEGATIVE_REGULATION_OF_HEMATOPOIETIC_PROGENITOR_CELL_DIFFERENTIATION	0.0418864	N4bp2l2
GO_GATOR1_COMPLEX	0.0418898	Rraga
GO_TRANSCRIPTION_FACTOR_TFIIIB_COMPLEX	0.0424743	Brf2
GO_POSITIVE_REGULATION_OF_CELL_CYCLE_G1_S_PHASE_TRANSITION	0.0425739	Fam83d;Lsm10
GO_NUCLEOLAR_PART	0.0427659	Pop7;Rpp38;Polr2l;Imp3
GO_MITOCHONDRION	0.0430033	Fam210a;Fen1;Ndufaf1;Mrps2;Tmem70;Trmt5;Mrps12;Mrpl14;Mrpl44;Coa7;Tst;Uqcrfs1;Tefm;Fahd1;Degs1;Tmem11
GO_CARBON_CARBON_LYASE_ACTIVITY	0.0431644	Umps;Fahd1
GO_INTERLEUKIN_8_PRODUCTION	0.0441936	Hyal2;Bcl10
GO_SPECIFIC_GRANULE	0.0445674	Ckap4;Hmox2;Degs1
GO_MAINTENANCE_OF_POSTSYNAPTIC_SPECIALIZATION_STRUCTURE	0.0449565	Arf6
GO_PROTEIN_SULFATION	0.0452976	Tpst2
GO_SEMICIRCULAR_CANAL_DEVELOPMENT	0.0453565	Hoxa1
GO_EIF2ALPHA_PHOSPHORYLATION_IN_RESPONSE_TO_ENDOPLASMIC_RETICULUM_STRESS	0.0457292	Nck1
GO_SKELETAL_SYSTEM_MORPHOGENESIS	0.0459833	Foxn3;Hoxa1;Hoxa2;Hyal2
GO_POSITIVE_REGULATION_OF_MAST_CELL_ACTIVATION_INVOLVED_IN_IMMUNE_RESPONSE	0.0460176	Adora2b
GO_NEURAL_FOLD_FORMATION	0.0461364	Luzp1
GO_CELLULAR_PROTEIN_CONTAINING_COMPLEX_ASSEMBLY	0.0461779	Clp1;Arf6;Nck1;Ndufaf1;Mrps2;Tmem70;Shq1;Brf2;Vps18;Tbcc;Gemin7;Cenpl
GO_RELAXATION_OF_SMOOTH_MUSCLE	0.0466056	Adora2b
GO_POSITIVE_REGULATION_OF_TRANSLATION_IN_RESPONSE_TO_STRESS	0.046907	Nck1
GO_ADENOSINE_RECEPTOR_SIGNALING_PATHWAY	0.0471257	Adora2b
GO_POSITIVE_REGULATION_OF_MRNA_CATABOLIC_PROCESS	0.0471273	Ythdf2;Tnrc6c
GO_PROTEIN_CARBOXYL_O_METHYLTRANSFERASE_ACTIVITY	0.047289	Lcmt2
GO_NUCLEIC_ACID_PHOSPHODIESTER_BOND_HYDROLYSIS	0.0475501	Pop7;Rpp38;Fen1;Aen;Mrpl44
GO_MAST_CELL_CYTOKINE_PRODUCTION	0.0478424	Bcl10
GO_NEGATIVE_REGULATION_OF_FIBROBLAST_MIGRATION	0.0479401	Hyal2
GO_RS_DOMAIN_BINDING	0.0479723	Son
GO_SIGNAL_COMPLEX_ASSEMBLY	0.0480379	Nck1
GO_RUFFLE_ORGANIZATION	0.0483309	Arf6;Rhog
GO_CELLULAR_RESPONSE_TO_EXTERNAL_STIMULUS	0.0484115	Rraga;Adora2b;Kif26a;Bcl11a;Bcl10
GO_ANCHORED_COMPONENT_OF_EXTERNAL_SIDE_OF_PLASMA_MEMBRANE	0.0485875	Hyal2
GO_RRNA_TRANSPORT	0.0488285	Tst
GO_PYRIMIDINE_NUCLEOBASE_BIOSYNTHETIC_PROCESS	0.0492179	Umps
GO_POSITIVE_REGULATION_OF_CELL_ACTIVATION	0.0492802	Adora2b;Nck1;Irs2;Bcl10
GO_RNA_DNA_HYBRID_RIBONUCLEASE_ACTIVITY	0.0493298	Fen1
GO_REGULATION_OF_OOCYTE_MATURATION	0.0495648	Ythdf2
GO_POSITIVE_REGULATION_OF_CGMP_MEDIATED_SIGNALING	0.0496729	Adora2b
