# Supplementary material for: m6A RNA methylation impacts fate choices during skin morphogenesis
Source: eLife. 2020 Aug 26;9:e56980. doi: 10.7554/eLife.56980 (PMC7535931; doi:10.7554/eLife.56980)
Supplement: Supplementary file 6. [file elife-56980-supp6.xlsx]

## Sheet: Sheet1
Genotyping Mettl3 F	CTCAAAAGAGGATTCAGAAAACAG
Genotyping Mettl3 R (WT)	GTCTTCTATTGCTTAGCTCACTCTATTC
Genotyping Mettl3 R (flox)	ACCCCAGGCTTCACTGAG
qRT-PCR Tbp F	AGAACAATCCAGACTAGCAGC
qRT-PCR Tbp R	GGGAACTTCACATCACAGCTC
qRT-PCR Apex1 F	TGGCTTCGTTGGGAGGC
qRT-PCR Apex1 R	GGGTTCTTCCCCGTCGTC
qRT-PCR Bmyc F	TAGCTTCTCCATCGCAGACC
qRT-PCR Bmyc R	TCTTCACGAAGGTCTCGTCATC
qRT-PCR Ccdc59 F	AGCGTGCGCAAGGGAC
qRT-PCR Ccdc59 R	CTGTGAACTGGGACTCCTGTG
qRT-PCR Clp1 F	GCACCAACATCAAGCTTTACAATAAGA
qRT-PCR Clp1 R	TGACACAGCCACTCACAGAAG
qRT-PCR Exosc4 F	CTGCAGCTACGACAGACCTTC
qRT-PCR Exosc4 R	CCATCTGCTTGCAGCACCT
qRT-PCR Gimap9 F	CTCTCATTAACTGTTGCAGAAGAAGAT
qRT-PCR Gimap9 R	GATCCTCACTTCAGTGTCTCCC
qRT-PCR Imp3 F	TTGCTCCTCAAGCTACGCA
qRT-PCR Imp3 R	GGGATCAGTGACCACGTCTG
qRT-PCR Lef1 F	AGAACACCCTGATGAAGGAAAG
qRT-PCR Lef1 R	ACATGTACGGGTCGCTGTT
qRT-PCR Lsm10 F	AAGGCGGAAGGCATCACG
qRT-PCR Lsm10 R	TCTCAGAAATAGTTCGCTCCTTCAC
qRT-PCR Myc F	CAGCGACTCTGAAGAAGAGCA
qRT-PCR Myc R	TTGTGCTGGTGAGTGGAGAC
qRT-PCR Ndufaf1 F	CGCCTGGTCTTCAGAGTGG
qRT-PCR Ndufaf1 R	AATGGAAGACATTGCCATCGTAAG
qRT-PCR Nxt1 F	ACTAAGATGAGCCACACCCTG
qRT-PCR Nxt1 R	CTCCTTAGGGATCCAGGGACT
qRT-PCR Pop7 F	AGCGACGTCCACTTGGATC
qRT-PCR Pop7 R	TGCCATGCTCTGAGTCCTTC
qRT-PCR Rhog F	GGGAGGGCACCAGGTCA
qRT-PCR Rhog R	CACTTGATGCTCTGCATTGTGC
qRT-PCR Sac3d1 F	TTTCTGCTCTACAACTTGGGTTC
qRT-PCR Sac3d1 R	GGAAGGCAGCGTCAACAG
